# Supplementary material for: A general copper-catalysed enantioconvergent C(sp3)–S cross-coupling via biomimetic radical homolytic substitution
Source: Springer Nature journal article supplement (doi:10.1038/s41557-023-01385-w), 2023-12-06
Supplement: MOESM1 [file 41557_2023_1385_MOESM1_ESM.pdf]

# A general copper-catalysed enantioconvergent C( $sp^3$ )–S cross-coupling via biomimetic radical homolytic substitution

---

In the format provided by the authors and unedited

---

## Table of Contents

|                                                                                                                                      |      |
|--------------------------------------------------------------------------------------------------------------------------------------|------|
| <b>General information</b> .....                                                                                                     | S2   |
| <b>1. Supplementary tables for experiments</b> .....                                                                                 | S3   |
| <b>2. Supplementary figures for experiments</b> .....                                                                                | S11  |
| <b>3. General procedure for synthesis of substrates</b> .....                                                                        | S21  |
| <b>4. Characterization data of ligands</b> .....                                                                                     | S48  |
| <b>5. Enantioconvergent cross-coupling of benzyl electrophiles with sodium arylthiosulfonate</b> .....                               | S54  |
| <b>6. Enantioconvergent cross-coupling of propargyl electrophiles with sodium benzenethiosulfonate</b> .....                         | S74  |
| <b>7. Enantioconvergent cross-coupling of tertiary alkyl electrophiles with thiobenzoic acid or potassium thiocarboxylates</b> ..... | S83  |
| <b>8. Investigation of other electrophiles</b> .....                                                                                 | S103 |
| <b>9. Procedure for synthetic applications (89–102)</b> .....                                                                        | S107 |
| <b>10. Mechanistic studies</b> .....                                                                                                 | S120 |
| <b>11. X-ray crystallography</b> .....                                                                                               | S129 |
| <b>12. Computational studies</b> .....                                                                                               | S135 |
| <b>13. NMR spectra</b> .....                                                                                                         | S143 |
| <b>14. HPLC spectra</b> .....                                                                                                        | S389 |
| <b>15. Reference</b> .....                                                                                                           | S496 |

## General information

Reactions were carried out under argon atmosphere using Schlenk techniques. Reagents were purchased at the highest commercial quality and used without further purification, unless otherwise stated.  $\text{Cu}(\text{MeCN})_4\text{BF}_4$  was purchased from TCI.  $\text{CuI}$  was purchased from Sigma-Aldrich.  $\text{Cu}(\text{PPh}_3)_3\text{CF}_3$  was purchased from Bide Pharmatech Ltd. Anhydrous toluene and diethyl ether ( $\text{Et}_2\text{O}$ ) distilled from sodium ( $\text{Na}$ ) and stored under argon.  $\text{Cs}_2\text{CO}_3$  and  $\text{Rb}_2\text{CO}_3$  were purchased from Bide Pharmatech Ltd, which were dry at  $200\text{ }^\circ\text{C}$  for 3 h in vacuum. Chloroform ( $\text{CHCl}_3$ ) was distilled from anhydrous calcium hydride ( $\text{CaH}_2$ ) and stored under argon. Analytical thin layer chromatography (TLC) was performed on precoated silica gel 60 GF254 plates. Flash column chromatography was performed using Tsingdao silica gel (60, particle size 0.040–0.063 mm). As the eluent, the petroleum ether (PE) and EtOAc were purchased from Shanghai Titan Scientific Co. Ltd without further purification. Visualization on TLC was achieved by use of UV light (254 nm), iodine or basic  $\text{KMnO}_4$  indicator. NMR spectra were recorded on Bruker DRX-400 spectrometers at 400 MHz for  $^1\text{H}$  NMR, 100 MHz for  $^{13}\text{C}$  NMR and 376 MHz for  $^{19}\text{F}$  NMR, respectively, in  $\text{CDCl}_3$ ,  $\text{CD}_3\text{OD}$  or  $\text{DMSO}-d_6$  with tetramethylsilane (TMS) as internal standard. The chemical shifts were expressed in ppm and coupling constants were given in Hz. Data for  $^1\text{H}$  NMR are recorded as follows: chemical shift (ppm), multiplicity (s, singlet; d, doublet; t, triplet; q, quartet; p, pentet, m, multiplet; br, broad), coupling constant (Hz), integration. Data for  $^{13}\text{C}$  NMR were reported in terms of chemical shift ( $\delta$ , ppm). Mass spectrometric data were obtained using Bruker Apex IV RTMS. Enantiomeric excess (e.e.) was determined using SHIMADZU LC-20AD with SPD-20AV detector (at appropriate wavelength). Column conditions were reported in the experimental section below. X-ray diffraction was measured on a 'Bruker APEX-II CCD' diffractometer with  $\text{Cu}-\text{K}\alpha$  radiation.

## 1. Supplementary tables for experiments

**Supplementary Table 1** | Investigation of the nucleophilic substitution reaction with benzyl electrophile.<sup>a</sup>

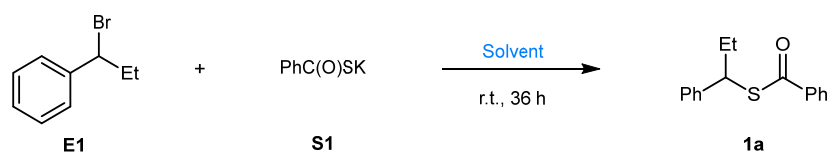

| Entry | Solvent           | Yield (%) <sup>b</sup> |
|-------|-------------------|------------------------|
| 1     | DMF               | 97                     |
| 2     | MeOH              | 81                     |
| 3     | MeCN              | 100                    |
| 4     | THF               | 98                     |
| 5     | Et <sub>2</sub> O | 7                      |
| 6     | DCM               | 4                      |
| 7     | Toluene           | 3                      |

<sup>a</sup>Reaction conditions: **E1** (0.05 mmol) and **S1** (1.2 equiv.) in solvent (1.0 mL) at room temperature (r.t.) for 36 h;

<sup>b</sup>Yield was based on <sup>1</sup>H-NMR analysis of the crude products using 1,3,5-trimethoxybenzene as an internal standard.

**Supplementary Table 2** | Reaction condition optimization with benzyl electrophile: screening of different copper salts.<sup>a</sup>

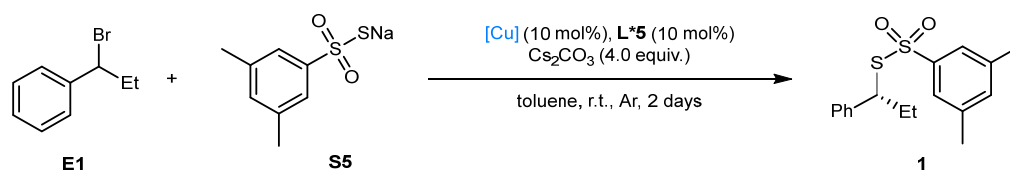

| Entry | [Cu]                                               | Yield (%) <sup>b</sup> | E.e. (%) <sup>c</sup> |
|-------|----------------------------------------------------|------------------------|-----------------------|
| 1     | CuI                                                | 80                     | 79                    |
| 2     | CuTc                                               | 64                     | 78                    |
| 3     | Cu(MeCN) <sub>4</sub> PF <sub>6</sub>              | 88                     | 80                    |
| 4     | <b>Cu(MeCN)<sub>4</sub>BF<sub>4</sub></b>          | <b>90</b>              | <b>80</b>             |
| 5     | Cu(PPh <sub>3</sub> ) <sub>2</sub> BH <sub>4</sub> | 51                     | 77                    |
| 6     | Cu(OTf) <sub>2</sub>                               | 41                     | 76                    |

<sup>a</sup>Reaction conditions: **E1** (0.05 mmol), **S5** (1.2 equiv.), [Cu] (10 mol%), **L\*1** (10 mol%), and Cs<sub>2</sub>CO<sub>3</sub> (4.0 equiv.) in toluene (0.5 mL) at r.t. for 2 days under argon;

<sup>b</sup>Yield was based on <sup>1</sup>H-NMR analysis of the crude products using 1,3,5-trimethoxybenzene as an internal standard;

<sup>c</sup>E.e. values were based on chiral HPLC analysis.

**Supplementary Table 3** | Reaction condition optimization with benzyl electrophile: screening of different solvents and temperature.<sup>a</sup>

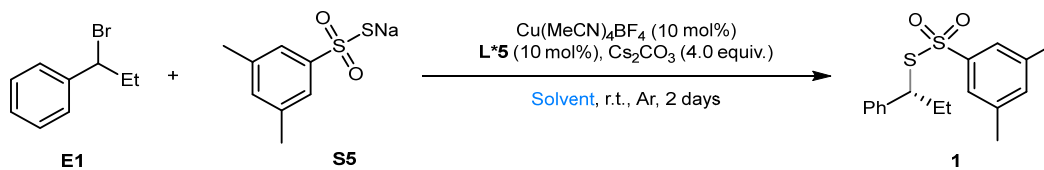

| Entry          | Solvent                   | Yield (%) <sup>b</sup> | E.e. (%) <sup>c</sup> |
|----------------|---------------------------|------------------------|-----------------------|
| 1              | Toluene                   | 90                     | 80                    |
| 2              | Et <sub>2</sub> O         | 23                     | 68                    |
| 3              | DCM                       | 88                     | 79                    |
| 4              | MeCN                      | 14                     | 62                    |
| 5              | Toluene/DMF (10/1)        | 80                     | 82                    |
| 6 <sup>d</sup> | Toluene/DMF (10/1)        | 79                     | 88                    |
| 7 <sup>e</sup> | <b>Toluene/DMF (10/1)</b> | <b>81</b>              | <b>92</b>             |
| 8 <sup>f</sup> | Toluene/DMF (10/1)        | 76                     | 92                    |
| 9 <sup>g</sup> | Toluene/DMF (10/1)        | 54                     | 92                    |

<sup>a</sup>Reaction conditions: **E1** (0.05 mmol), **S5** (1.2 equiv.),  $\text{Cu}(\text{MeCN})_4\text{BF}_4$  (10 mol%), **L\*5** (10 mol%), and  $\text{Cs}_2\text{CO}_3$  (4.0 equiv.) in solvent (0.5 mL) at r.t. for 2 days under argon;

<sup>b</sup>Yield was based on <sup>1</sup>H-NMR analysis of the crude products using 1,3,5-trimethoxybenzene as an internal standard;

<sup>c</sup>E.e. values were based on chiral HPLC analysis;

<sup>d</sup>Run at 0 °C, 3 days;

<sup>e</sup>Run at -15 °C, 3 days;

<sup>f</sup>H<sub>2</sub>O (1.0 equiv.) in toluene/DMF (vol/vol = 10/1) at -15 °C for 3 days;

<sup>g</sup> $\text{Cu}(\text{MeCN})_4\text{BF}_4$  (2.5 mol%), **L\*5** (2.5 mol%) was used.

**Supplementary Table 4** | Reaction condition optimization with propargyl electrophile: screening of different copper salts and solvents.<sup>a</sup>

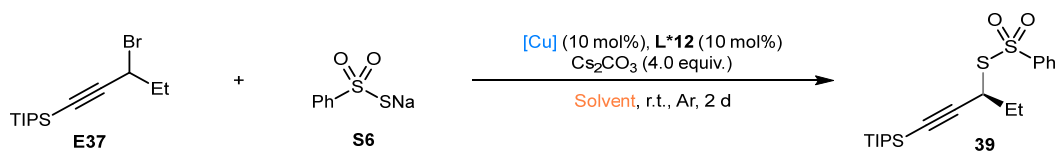

| Entry | [Cu]                                   | Solvent                                    | Yield (%) <sup>b</sup> | E.e. (%) <sup>c</sup> |
|-------|----------------------------------------|--------------------------------------------|------------------------|-----------------------|
| 1     | $\text{Cu}(\text{MeCN})_4\text{BF}_4$  | Toluene                                    | 31                     | 63                    |
| 2     | <b>CuI</b>                             | Toluene                                    | <b>38</b>              | <b>63</b>             |
| 3     | CuTc                                   | Toluene                                    | 13                     | 62                    |
| 4     | $\text{Cu}(\text{OTf})_2$              | Toluene                                    | 4                      | 60                    |
| 5     | $\text{Cu}(\text{PPh}_3)_3\text{CF}_3$ | Toluene                                    | 14                     | 62                    |
| 6     | CuI                                    | $\text{Et}_2\text{O}$                      | trace                  | -- <sup>d</sup>       |
| 7     | CuI                                    | <b><math>\text{CH}_2\text{Cl}_2</math></b> | <b>13</b>              | <b>78</b>             |
| 8     | CuI                                    | $\text{CHCl}_3$                            | trace                  | -- <sup>d</sup>       |
| 9     | CuI                                    | MeCN                                       | trace                  | -- <sup>d</sup>       |

<sup>a</sup>Reaction conditions: **E37** (0.05 mmol), **S6** (1.2 equiv.), **[Cu]** (10 mol%), **L\*12** (10 mol%), and  $\text{Cs}_2\text{CO}_3$  (4.0 equiv.) in solvent (0.5 mL) at r.t. for 2 days under argon;

<sup>b</sup>Yield was based on  $^1\text{H-NMR}$  analysis of the crude products using 1,3,5-trimethoxybenzene as an internal standard;

<sup>c</sup>E.e. values were based on chiral HPLC analysis;

<sup>d</sup>Not determined.

**Supplementary Table 5** | Reaction condition optimization with propargyl electrophile: screening of different catalyst ratios and bases.<sup>a</sup>

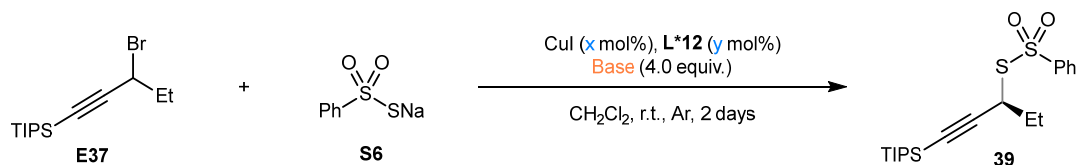

| Entry    | CuI             | <b>L*12</b>   | Base                                       | Yield (%) <sup>b</sup> | E.e. (%) <sup>c</sup> |
|----------|-----------------|---------------|--------------------------------------------|------------------------|-----------------------|
| 1        | 10 mol%         | 10 mol%       | $\text{Cs}_2\text{CO}_3$                   | 13                     | 78                    |
| 2        | 10 mol%         | 8 mol%        | $\text{Cs}_2\text{CO}_3$                   | 14                     | 78                    |
| 3        | 7.5 mol%        | 6 mol%        | $\text{Cs}_2\text{CO}_3$                   | 13                     | 78                    |
| <b>4</b> | <b>7.5 mol%</b> | <b>6 mol%</b> | <b><math>\text{Rb}_2\text{CO}_3</math></b> | <b>60</b>              | <b>78</b>             |
| 5        | 7.5 mol%        | 6 mol%        | $\text{K}_2\text{CO}_3$                    | 29                     | 67                    |
| 6        | 7.5 mol%        | 6 mol%        | $\text{K}_3\text{PO}_4$                    | 59                     | 78                    |

<sup>a</sup>Reaction conditions: **E37** (0.05 mmol), **S6** (1.2 equiv.),  $\text{CuI}$  ( $x$  mol%), **L\*12** ( $y$  mol%), and Base (4.0 equiv.) in  $\text{CH}_2\text{Cl}_2$  (0.5 mL) at r.t. for 2 days under argon;

<sup>b</sup>Yield was based on  $^1\text{H-NMR}$  analysis of the crude products using 1,3,5-trimethoxybenzene as an internal standard;

<sup>c</sup>E.e. values were based on chiral HPLC analysis.



**Supplementary Table 6** | Reaction condition optimization with propargyl electrophile: screening of equivalent of base, H<sub>2</sub>O, and temperature.<sup>a</sup>

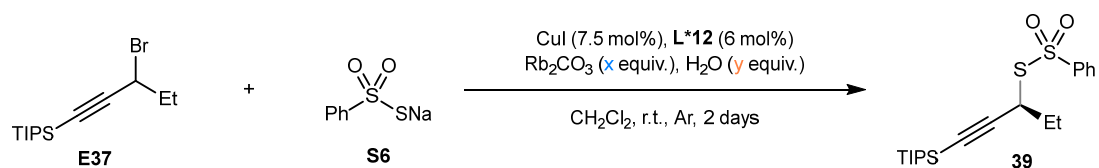

| Entry                | Rb <sub>2</sub> CO <sub>3</sub> | H <sub>2</sub> O  | Yield (%) <sup>b</sup> | E.e. (%) <sup>c</sup> |
|----------------------|---------------------------------|-------------------|------------------------|-----------------------|
| 1                    | 4.0 equiv.                      | none              | 60                     | 78                    |
| 2                    | 2.0 equiv.                      | none              | 58                     | 78                    |
| 3 <sup>d</sup>       | 2.0 equiv.                      | none              | 32                     | 83                    |
| 4 <sup>d</sup>       | 2.0 equiv.                      | 2.0 equiv.        | 83                     | 83                    |
| 5 <sup>e</sup>       | 2.0 equiv.                      | 2.0 equiv.        | 91                     | 88                    |
| <b>6<sup>f</sup></b> | <b>2.0 equiv.</b>               | <b>2.0 equiv.</b> | <b>93</b>              | <b>90</b>             |

<sup>a</sup>Reaction conditions: **E37** (0.05 mmol), **S6** (1.2 equiv.), CuI (7.5 mol%), L\*12 (6 mol%), Rb<sub>2</sub>CO<sub>3</sub> (x equiv.) and H<sub>2</sub>O (y equiv.) in CH<sub>2</sub>Cl<sub>2</sub> (0.5 mL) at r.t. for 2 days under argon;

<sup>b</sup>Yield was based on <sup>1</sup>H-NMR analysis of the crude products using 1,3,5-trimethoxybenzene as an internal standard;

<sup>c</sup>E.e. values were based on chiral HPLC analysis;

<sup>d</sup>E.e. run at 0 °C, 2 days;

<sup>e</sup>E.e. run at -20 °C, 3 days;

<sup>f</sup>E.e. run at -20 °C in CHCl<sub>3</sub>, 3 days.

**Supplementary Table 7 | Reaction condition optimization with tertiary electrophile: screening of different solvents and copper salts.<sup>a</sup>**

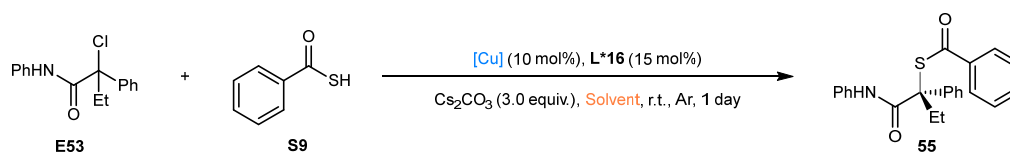

| Entry                 | [Cu]                                                     | Solvent                | Yield (%) <sup>b</sup> | E.e. (%) <sup>c</sup> |
|-----------------------|----------------------------------------------------------|------------------------|------------------------|-----------------------|
| 1                     | CuI                                                      | EtOAc                  | 85                     | 76                    |
| 2                     | CuI                                                      | $\text{CHCl}_3$        | 10                     | 44                    |
| 3                     | CuI                                                      | THF                    | 74                     | 66                    |
| 4                     | CuI                                                      | Toluene                | 86                     | 78                    |
| 5                     | CuI                                                      | 1,4-Dioxane            | 55                     | 60                    |
| <b>6</b>              | CuI                                                      | <b>Et<sub>2</sub>O</b> | <b>81</b>              | <b>79</b>             |
| 7                     | CuCN                                                     | Et <sub>2</sub> O      | 78                     | 67                    |
| 8                     | CuTc                                                     | Et <sub>2</sub> O      | 77                     | 57                    |
| 9                     | $\text{Cu}(\text{MeCN})_4\text{PF}_6$                    | Et <sub>2</sub> O      | 82                     | 80                    |
| 10                    | $\text{Cu}(\text{PPh}_3)_3\text{CF}_3$                   | Et <sub>2</sub> O      | 84                     | 83                    |
| 11 <sup>d</sup>       | $\text{Cu}(\text{PPh}_3)_3\text{CF}_3$                   | Et <sub>2</sub> O      | 90                     | 87                    |
| <b>12<sup>e</sup></b> | <b><math>\text{Cu}(\text{PPh}_3)_3\text{CF}_3</math></b> | <b>Et<sub>2</sub>O</b> | <b>93</b>              | <b>90</b>             |
| <b>13<sup>f</sup></b> | <b><math>\text{Cu}(\text{PPh}_3)_3\text{CF}_3</math></b> | <b>Et<sub>2</sub>O</b> | <b>93</b>              | <b>90</b>             |

<sup>a</sup>Reaction conditions: **E53** (0.05 mmol), **S9** (1.5 equiv.), CuI (10 mol%), **L\*16** (15 mol%) and  $\text{Cs}_2\text{CO}_3$  (3.0 equiv.) in EtOAc (1.0 mL) at r.t. for 1 day under argon;

<sup>b</sup>Yield was based on <sup>1</sup>H-NMR analysis of the crude products using 1,3,5-trimethylbenzene as an internal standard;

<sup>c</sup>E.e. values were based on chiral HPLC analysis;

<sup>d</sup>run at 0 °C, 2 days;

<sup>e</sup>run at -10 °C, 3 days;

<sup>f</sup>**S1** was used, run at -10 °C, 3 days.

**Supplementary Table 8** | Investigation of the background reactions.

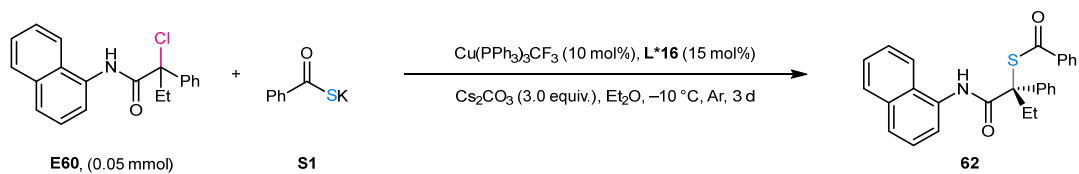

| Entry | [Cu] | L*16 | Cs <sub>2</sub> CO <sub>3</sub> | Yield | E.e. |
|-------|------|------|---------------------------------|-------|------|
| 1     | ×    | ✓    | ✓                               | 52%   | 1%   |
| 2     | ✓    | ×    | ✓                               | 45%   | --   |
| 3     | ×    | ×    | ✓                               | 36%   | --   |
| 4     | ✓    | ✓    | ✓                               | 95%   | 95%  |

Reaction conditions: **E60** (0.05 mmol, 1.0 equiv.), **S1** (1.5 equiv.), Cu(PPh<sub>3</sub>)<sub>3</sub>CF<sub>3</sub> (10 mol%), **L\*16** (15 mol%), and Cs<sub>2</sub>CO<sub>3</sub> (3.0 equiv.) in Et<sub>2</sub>O (1.0 mL) at -10 °C for 3 days under argon. Yield is based on <sup>1</sup>H-NMR analysis of the crude products using 1,3,5-trimethylbenzene as an internal standard; E.e. is based on chiral HPLC analysis.

## 2. Supplementary figures for experiments

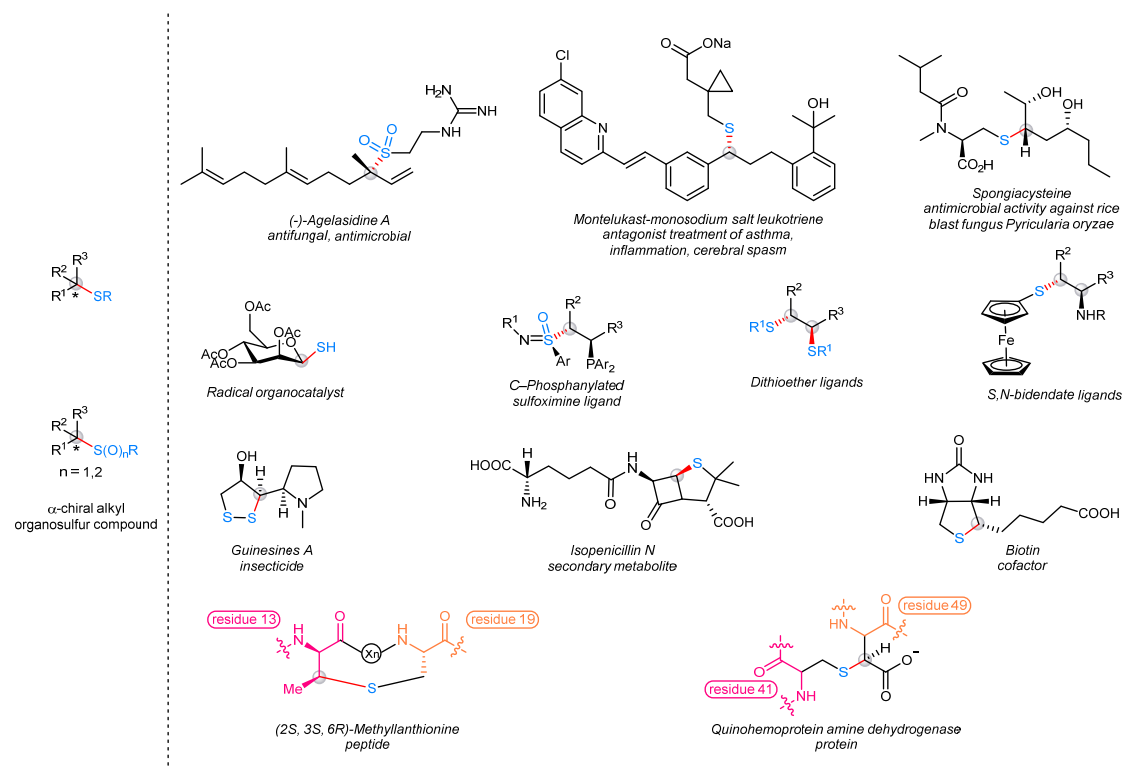

**Supplementary Fig. 1** |  $\alpha$ -Chiral alkyl organosulfur compounds in drugs, natural products, catalysts, ligands, metabolites, biomacromolecules and cofactors.

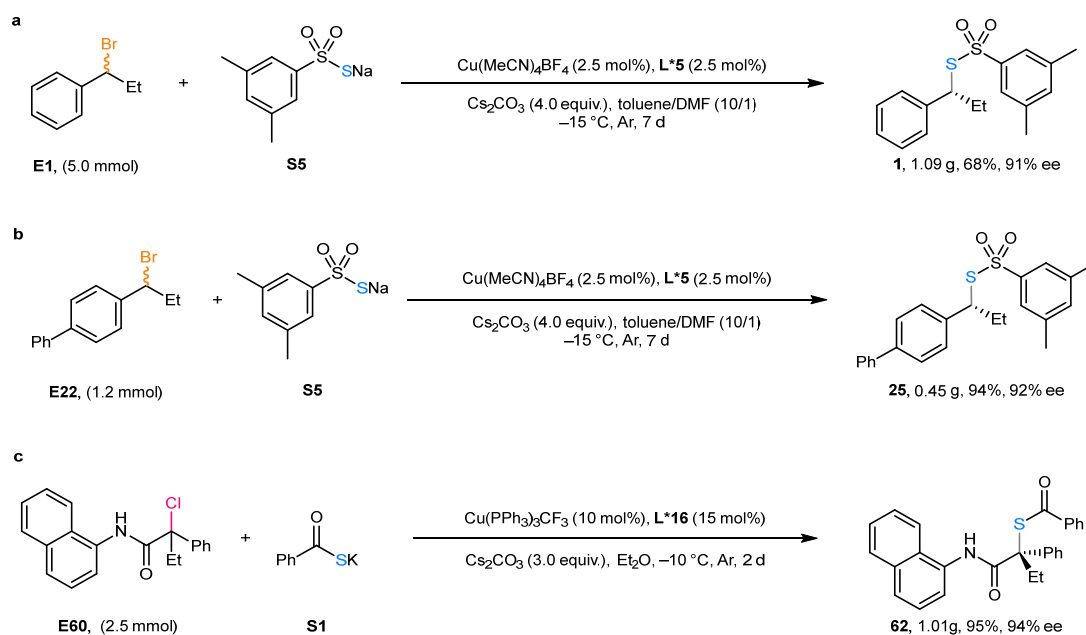

**Supplementary Fig. 2 | Large-scale experiments.** **a**, Reaction conditions: **E1** (5.0 mmol), **S5** (1.2 equiv.),  $\text{Cu(MeCN)}_4\text{BF}_4$  (2.5 mol%), **L\*5** (2.5 mol%) and  $\text{Cs}_2\text{CO}_3$  (4.0 equiv.) in toluene/DMF (vol/vol = 10/1, 55 mL) at  $-15^\circ\text{C}$  for 7 days under argon; **b**, Reaction conditions: **E22** (1.2 mmol), **S5** (1.2 equiv.),  $\text{Cu(MeCN)}_4\text{BF}_4$  (2.5 mol%), **L\*5** (2.5 mol%) and  $\text{Cs}_2\text{CO}_3$  (4.0 equiv.) in toluene/DMF (vol/vol = 10/1, 13.2 mL) at  $-15^\circ\text{C}$  for 7 days under argon. **c**, **E60** (2.5 mmol, 1.0 equiv.), **S1** (1.5 equiv.),  $\text{Cu(PPh}_3)_3\text{CF}_3$  (10 mol%), **L\*16** (15 mol%), and  $\text{Cs}_2\text{CO}_3$  (3.0 equiv.) in  $\text{Et}_2\text{O}$  (50 mL) at  $-10^\circ\text{C}$  for 2 days under argon. Isolated yields are shown; E.e. is based on chiral HPLC analysis.

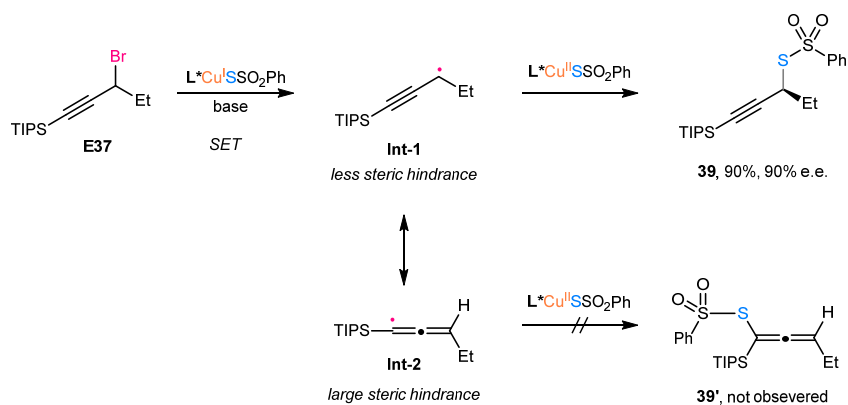

**Supplementary Fig. 3 | Explanation for the observed regioselectivity.** The complex  $\text{L}^*\text{Cu}^{\text{I}}\text{SSO}_2\text{Ph}$  reduced **E37** to generate a propargylic radical (**Int-1**) and its resonance structure allenyl radical (**Int-2**). Subsequently, the propargylic radical (**Int-1**) coupled with the complex  $\text{L}^*\text{Cu}^{\text{II}}\text{SSO}_2\text{Ph}$ , giving rise to the propargylic cross-coupling product **39** in high yield. It was difficult for the allenyl radical (**Int-2**) to react with the complex  $\text{L}^*\text{Cu}^{\text{II}}\text{SSO}_2\text{Ph}$  due to the steric hindrance of the TIPS group. Therefore, we reasoned that the exclusive regioselectivity might be attributed to the less steric **int-I** than **int-II**.<sup>1-3</sup>

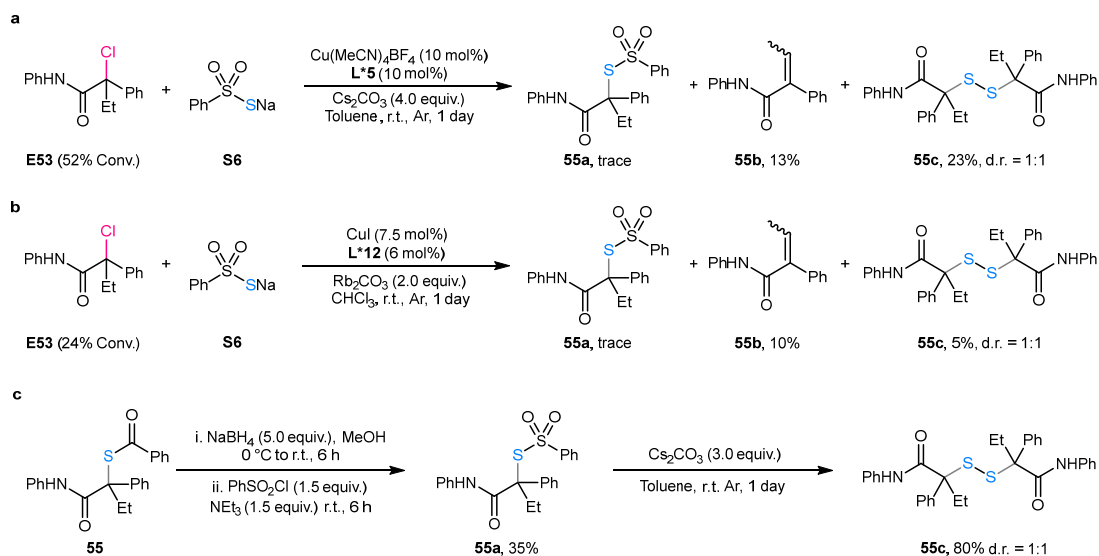

### Supplementary Fig. 4 | Investigation of the reaction with tertiary electrophiles and S6.

**a**, Reaction conditions: **E53** (0.2 mmol), **S6** (0.24 mmol, 1.2 equiv.),  $\text{Cu}(\text{MeCN})_4\text{BF}_4$  (10 mol%), **L\*5** (10 mol%) and  $\text{Cs}_2\text{CO}_3$  (4.0 equiv.) in toluene (2.0 mL) at r.t. for 1 day under argon; **b**, Reaction conditions: **E53** (0.2 mmol), **S6** (0.24 mmol, 1.2 equiv.),  $\text{CuI}$  (7.5 mol%), **L\*12** (6 mol%) and  $\text{Rb}_2\text{CO}_3$  (2.0 equiv.) in  $\text{CH}_2\text{Cl}_2$  (2.0 mL) at r.t. for 1 day under argon. The major side product was elimination by-product **55b** and dimerization by-product **55c**, of which the latter was possibly derived from **55a**.

We have carefully analyzed the NMR spectrum of the crude product for the reaction of **E53** and **S6** in the presence of **L\*5**. We have found that the conversion of **E53** was ca. 52% and the elimination by-product **55b** (13% yield) together with the disulfide by-product **55c** (23% yield) was formed. The reaction with **L\*12** gave a similar result. We theorized that **55c** was probably derived from the desired product **55a** under basic conditions. To verify our hypothesis, we synthesized compound **55a** and found that it could be easily converted to **55c** upon exposure to simply basic conditions.

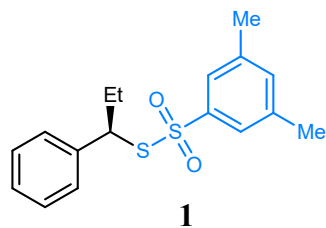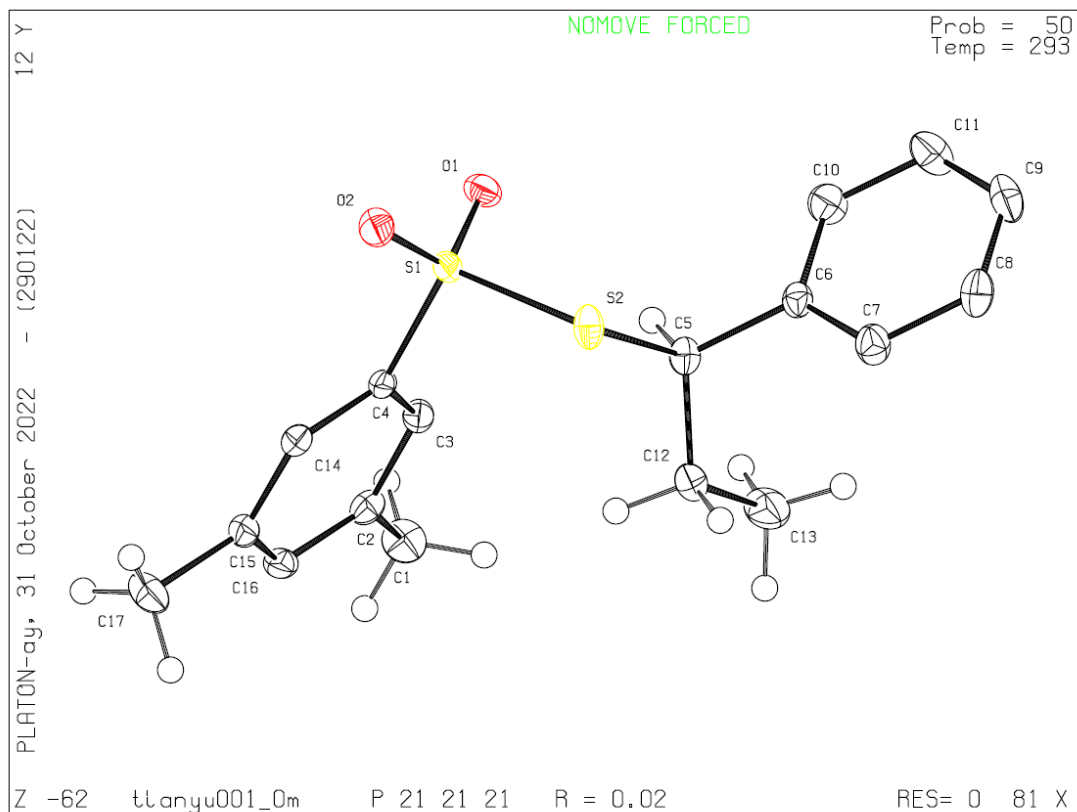

**Supplementary Fig. 5 | The X-ray structure of 1 (CCDC 2212974, 50% probability ellipsoids).**



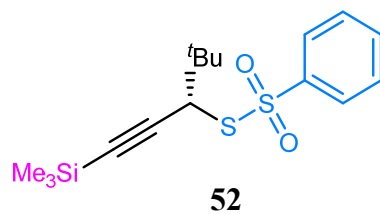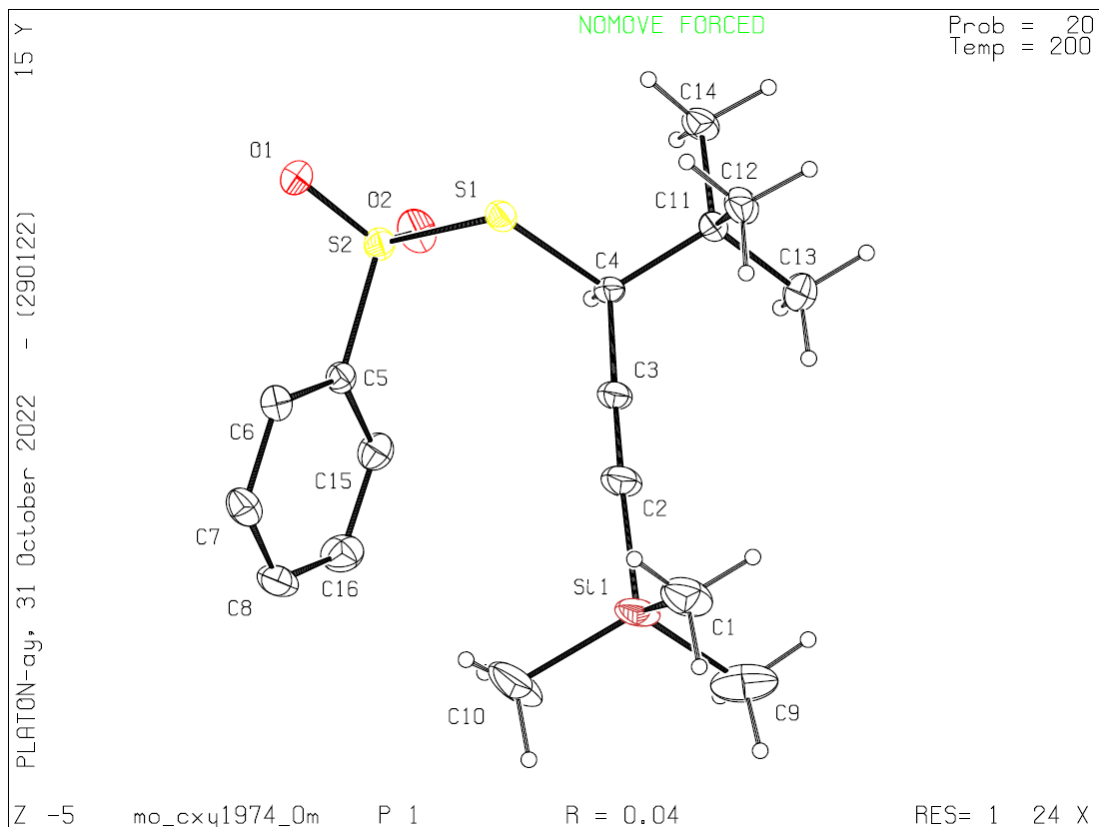

**Supplementary Fig. 6 | The X-ray structure of 52 (CCDC 2213037, 50% probability ellipsoids).**

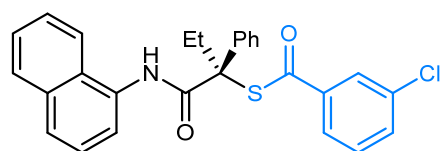

**83**

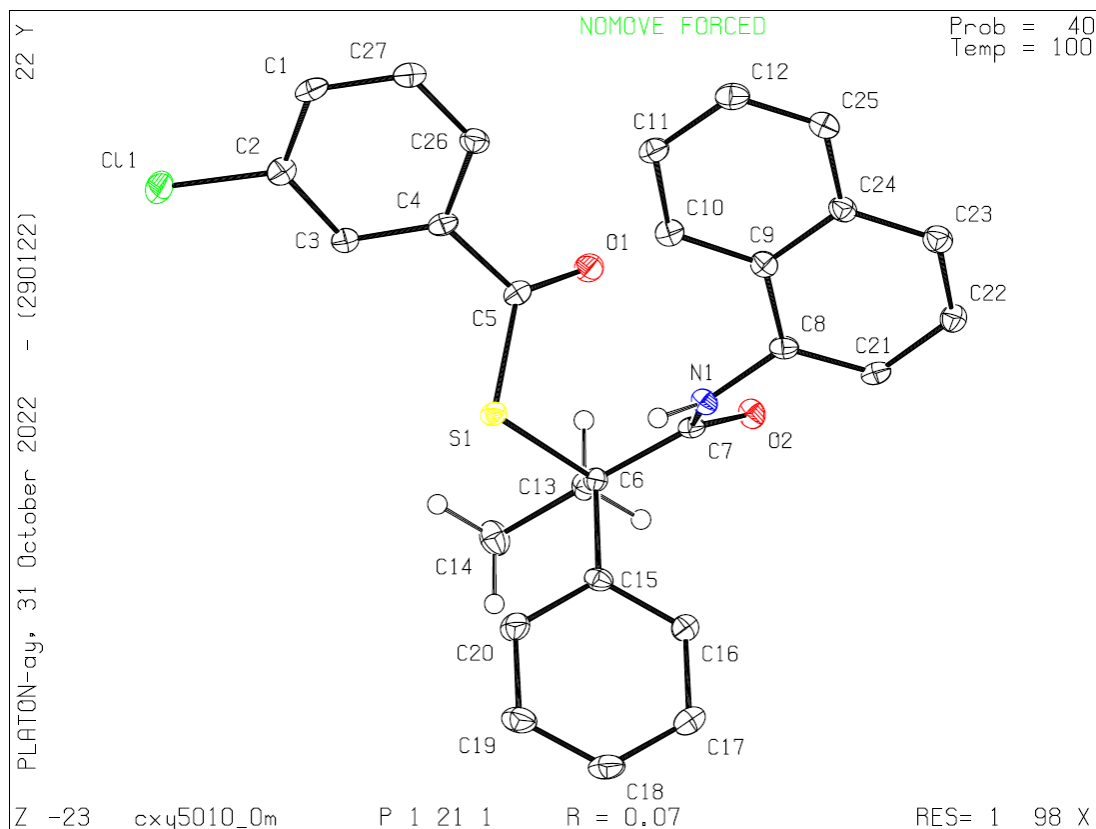

**Supplementary Fig. 7 | The X-ray structure of 83 (CCDC 2213038, 50% probability ellipsoids).**

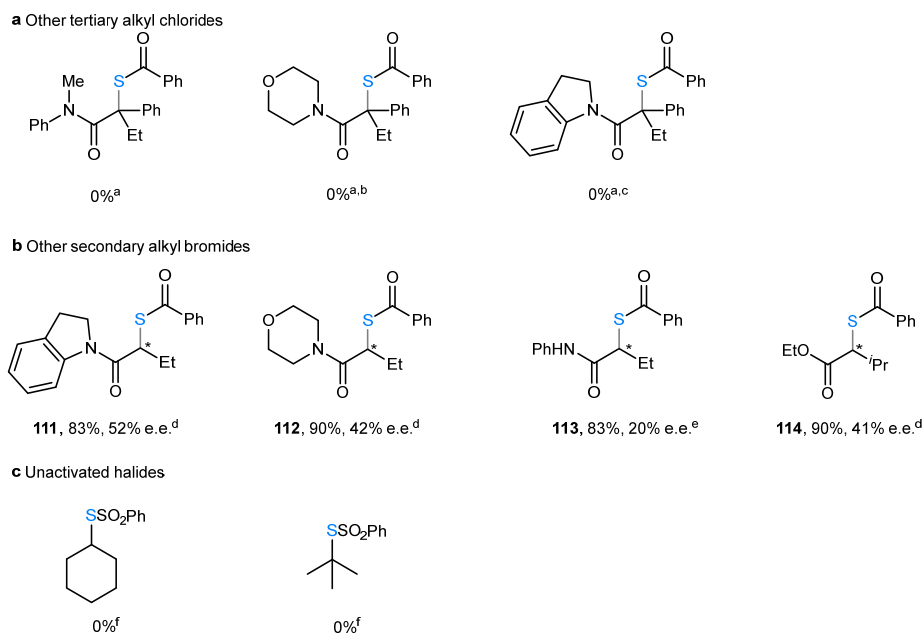

**Supplementary Fig. 8 | Unsuccessful examples.** <sup>a</sup>Cu(PPh<sub>3</sub>)<sub>3</sub>CF<sub>3</sub> (10 mol%), **L\*16** (15 mol%), Cs<sub>2</sub>CO<sub>3</sub> (3.0 equiv.), Et<sub>2</sub>O, Ar, -10 °C, 3 d. low conversion was observed at -10 °C, with the radical cyclization by-product (**107**) detected.

<sup>b</sup>No conversion was observed at -10 °C, low conversion was observed with the major elimination by-product (**108**) detected at 40 °C.

<sup>c</sup>No conversion was observed at -10 °C, low conversion was observed with the elimination and hydrogen abstraction by-products (**109** and **110**) detected at 40 °C.

<sup>d</sup>Cu(MeCN)<sub>4</sub>BF<sub>4</sub> (10 mol%), **L\*5** (10 mol%), Cs<sub>2</sub>CO<sub>3</sub> (4.0 equiv.), toluene, -10 °C, Ar, 3 d.

<sup>e</sup>Cu(PPh<sub>3</sub>)<sub>3</sub>CF<sub>3</sub> (10 mol%), **L\*16** (15 mol%), Cs<sub>2</sub>CO<sub>3</sub> (3.0 equiv.), Et<sub>2</sub>O, r.t., Ar, 1 d.

<sup>f</sup>Cu(MeCN)<sub>4</sub>BF<sub>4</sub> (10 mol%), **L\*5** (10 mol%), Cs<sub>2</sub>CO<sub>3</sub> (4.0 equiv.), toluene, r.t., 2 d. Both alkyl bromide and iodide was used and low conversion of alkyl bromide/iodide was observed.

**a** Radical trap experiments for the benzyl reaction

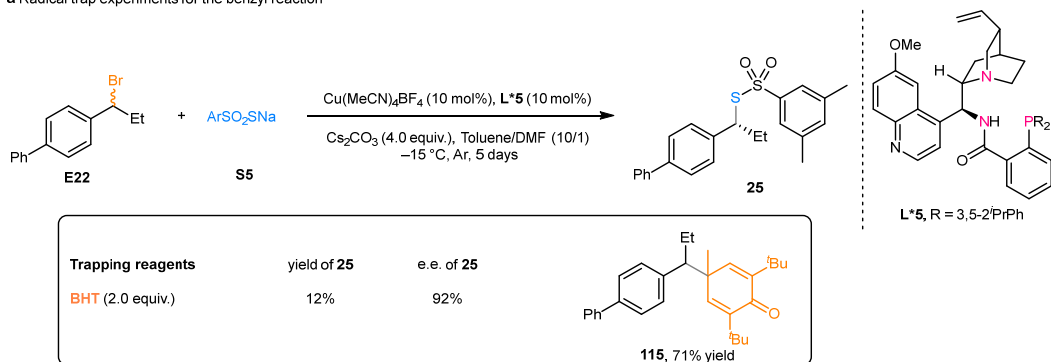

**b** Radical trap experiments for the propargyl reaction

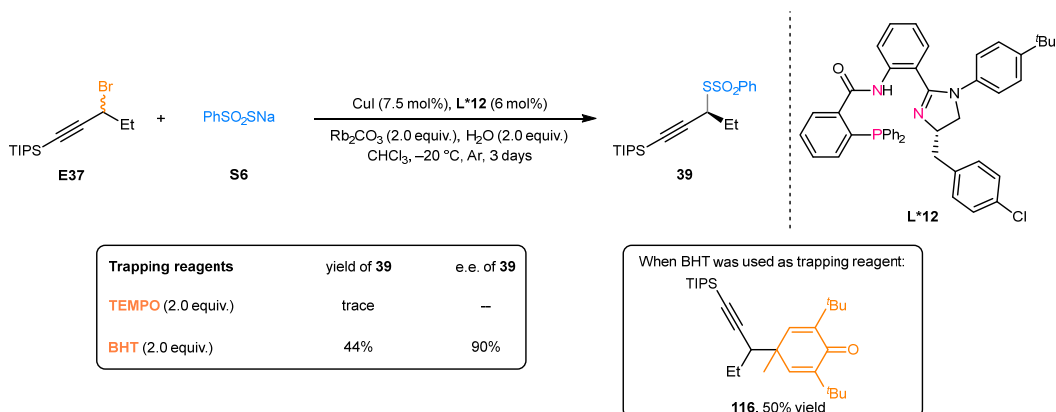

**c** The effect of ligand and copper(I) thiocarboxylates for the tertiary reaction

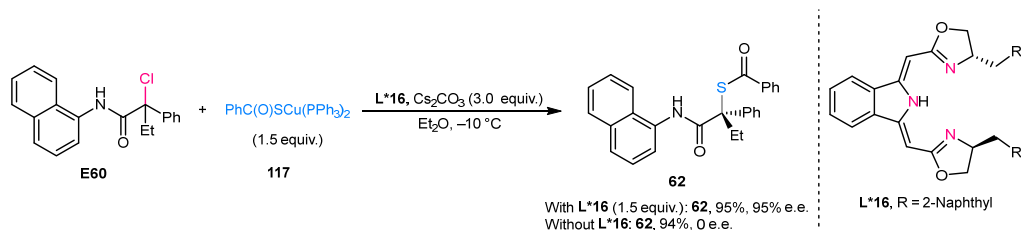

**d** Radical clock experiments for the tertiary reaction

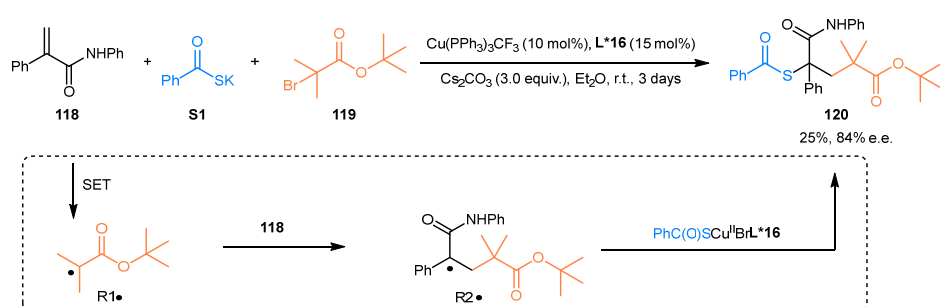

**Supplementary Fig. 9 | Mechanistic discussion.** **a**, The benzyl coupling was inhibited by BHT and the BHT-trapped product **115** was isolated. **b**, The propargyl coupling were inhibited by TEMPO and BHT and the BHT-trapped product **116** was isolated. **c**, The effects of the ligand and copper(I) thiocarboxylates for the tertiary reaction. **d**, Radical clock experiment for the tertiary reaction. Ar, 3,5-dimethyl phenyl; TEMPO, 2,2,6,6-tetramethyl-1-piperidinyloxy; BHT, 2,6-di-*tert*-butyl-4-methylphenol.

The radical trap experiment and isolated BHT-trapped product **115** indicated the formation of benzyl radical species from benzyl halides via a single-electron-transfer process.

The radical trap experiment and isolated BHT-trapped product **116** indicated the formation of propargyl radical species from propargyl halides via a single-electron-transfer process.

There was a strong background reaction without chiral ligand **L\*16** in the tertiary reaction. The combination of **L\*16** and copper(I) thiocarboxylates effectively tuned reactivity and enantioselectivity of this reaction.

The  $\text{PhC(O)SCu}^{\text{I}}\text{L}^*\text{16}$  reduced the radical precursor **119**, leading to the  $\text{PhC(O)SCu}^{\text{II}}\text{BrL}^*\text{16}$  and a R1 radical. The R1 radical underwent a facile addition to alkene **118** and provided the prochiral tertiary alkyl R2 radical. Next, R2 radical interacted with  $\text{PhC(O)SCu}^{\text{II}}\text{BrL}^*\text{16}$  to deliver the desired product **120** and regenerated the copper(I) species.

### 3. General procedure for synthesis of substrates

*Note:* The sodium benzenesulfinate **S2**, sodium benzenethiolate **S3**, sodium hydrosulfide **S4** and thiobenzoic acid **S9** were known compounds and commercially available.

#### The structures and synthesis of potassium arylthioates or alkylthioate:

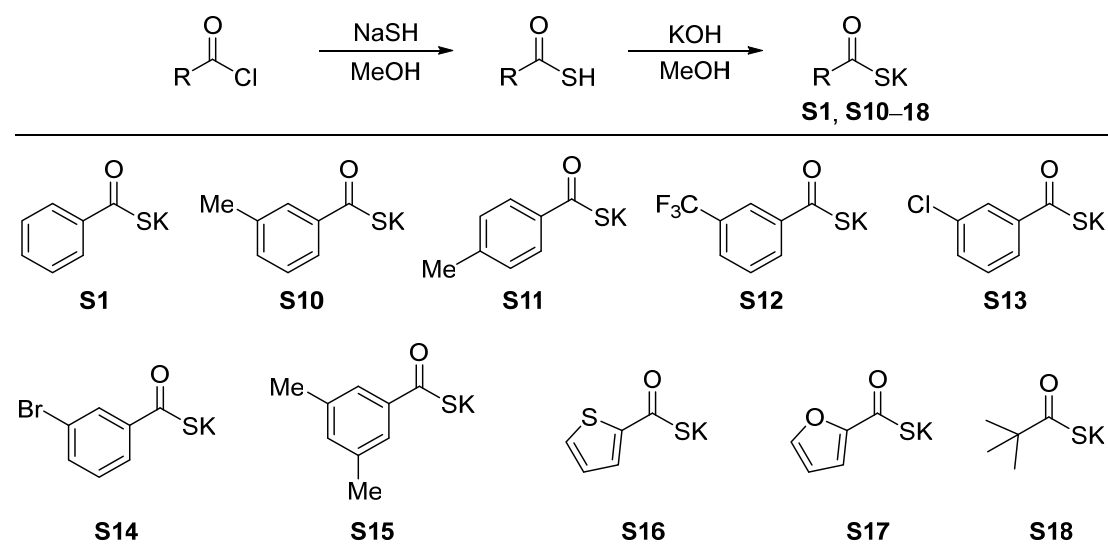

#### General procedure 1:

NaSH (purity: 70%, 2.4 g, 30 mmol, 3.0 equiv.) was suspended in MeOH (20.0 mL) and cooled to 0 °C. Acyl chloride (10.0 mmol, 1.0 equiv.) was added slowly. After stirring at this temperature for 2 hours, the mixture was quenched with HCl (1.0 M) and extracted with CH<sub>2</sub>Cl<sub>2</sub>. The combined organic phase was washed with brine, dried over anhydrous Na<sub>2</sub>SO<sub>4</sub>, filtered and concentrated to get the thiocarboxylic acid. Then the thiocarboxylic acid was dissolved in MeOH (10.0 mL). A solution of KOH (8.0 mmol) in MeOH (5.0 mL) was added to the thiocarboxylic acid solution. After shaking, the solvent was removed using rotary evaporator. The resulting solid was washed with CH<sub>2</sub>Cl<sub>2</sub> (20.0 mL) and collected by filtration. The solid was then recrystallized from MeOH/toluene for further purification.

*Note:* The substrates **S1**, **S16** and **S17** were known compounds and synthesized according to reported literature<sup>4</sup>.

#### Potassium benzothioate (S1)

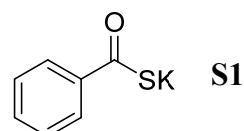

<sup>1</sup>H NMR (400 MHz, CD<sub>3</sub>OD) δ 8.23 – 8.14 (m, 2H), 7.47 – 7.40 (m, 1H), 7.40 – 7.31 (m, 2H).

<sup>13</sup>C NMR (100 MHz, CD<sub>3</sub>OD) δ 214.6, 145.6, 131.4, 129.1, 128.3.

### Potassium 3-methylbenzothioate (S10)

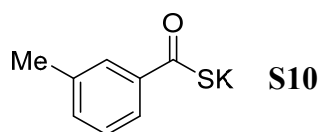

According to **General procedure 1** with 3-methylbenzoyl chloride (1.55 g, 10 mmol, 1.0 equiv.), yield the product **S10** as a white solid (1.35 g, 71% yield).

**<sup>1</sup>H NMR** (400 MHz, CD<sub>3</sub>OD) δ 7.98 – 7.94 (m, 1H), 7.93 – 7.88 (m, 1H), 7.24 – 7.18 (m, 2H), 2.37 (s, 3H).

**<sup>13</sup>C NMR** (100 MHz, CD<sub>3</sub>OD) δ 214.9, 145.8, 137.9, 132.0, 129.8, 128.2, 126.3, 21.4.

**HRMS** (ESI) *m/z* calcd for C<sub>8</sub>H<sub>7</sub>K<sub>2</sub>OS [M + K]<sup>+</sup> 228.9486, found: 228.9485.

### Potassium 4-methylbenzothioate (S11)

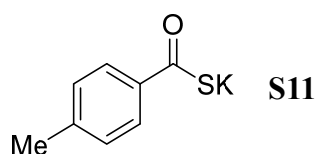

According to **General procedure 1** with 4-methylbenzoyl chloride (1.55 g, 10 mmol, 1.0 equiv.), yield the product **S11** as a white solid (1.52 g, 80% yield).

**<sup>1</sup>H NMR** (400 MHz, CD<sub>3</sub>OD) δ 8.02 (d, *J* = 8.2 Hz, 2H), 7.12 (d, *J* = 7.9 Hz, 2H), 2.34 (s, 3H).

**<sup>13</sup>C NMR** (100 MHz, CD<sub>3</sub>OD) δ 214.4, 143.1, 141.8, 129.4, 128.9, 21.3.

**HRMS** (ESI) *m/z* calcd for C<sub>8</sub>H<sub>7</sub>K<sub>2</sub>OS [M + K]<sup>+</sup> 228.9486, found: 228.9485.

### Potassium 3-(trifluoromethyl)benzothioate (S12)

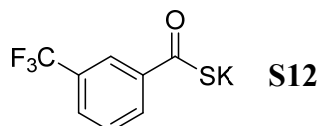

According to **General procedure 1** with 3-(trifluoromethyl)benzoyl chloride (2.09 g, 10 mmol, 1.0 equiv.), yield the product **S12** as a light yellow solid (2.07 g, 85% yield).

**<sup>1</sup>H NMR** (400 MHz, CD<sub>3</sub>OD) δ 8.56 (s, 1H), 8.45 (d, *J* = 8.0 Hz, 1H), 7.74 (d, *J* = 7.7 Hz, 1H), 7.58 (t, *J* = 7.8 Hz, 1H).

**<sup>13</sup>C NMR** (100 MHz, CD<sub>3</sub>OD) δ 212.2, 146.1, 132.5 (d, *J* = 1.4 Hz), 130.6 (q, *J* = 32.1 Hz), 129.2, 127.5 (q, *J* = 3.8 Hz), 126.0 (q, *J* = 3.9 Hz), 125.7 (d, *J* = 271.4 Hz).

**<sup>19</sup>F NMR** (376 MHz, CD<sub>3</sub>OD) δ –63.86.

**HRMS** (ESI) *m/z* calcd for C<sub>8</sub>H<sub>4</sub>F<sub>3</sub>OS [M – K]<sup>–</sup> 204.9940, found: 204.9934.

### Potassium 3-chlorobenzothioate (S13)

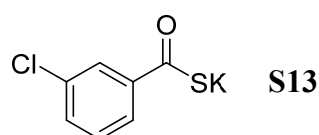

According to **General procedure 1** with 3-chlorobenzoyl chloride (1.75 g, 10 mmol, 1.0 equiv.), yield the product **S13** as a white solid (1.64 g, 78% yield).

$^1\text{H NMR}$  (400 MHz,  $\text{CD}_3\text{OD}$ )  $\delta$  8.15 (t,  $J = 1.9$  Hz, 1H), 8.06 (dt,  $J = 7.7, 1.4$  Hz, 1H), 7.40 (ddd,  $J = 7.9, 2.2, 1.2$  Hz, 1H), 7.32 (t,  $J = 7.8$  Hz, 1H).

$^{13}\text{C NMR}$  (100 MHz,  $\text{CD}_3\text{OD}$ )  $\delta$  212.4, 147.4, 134.3, 130.9, 129.8, 129.2, 127.4.

**HRMS** (ESI)  $m/z$  calcd for  $\text{C}_7\text{H}_4\text{ClK}_2\text{OS}$   $[\text{M} + \text{K}]^+$  248.8940, found: 248.8937.

#### Potassium 3-bromobenzothioate (**S14**)

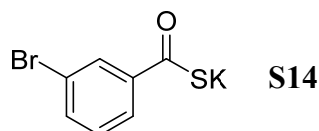

According to **General procedure 1** with 3-bromobenzoyl chloride (2.19 g, 10 mmol, 1.0 equiv.), yield the product **S14** as a white solid (2.04 g, 80% yield).

$^1\text{H NMR}$  (400 MHz,  $\text{CD}_3\text{OD}$ )  $\delta$  8.28 (t,  $J = 1.8$  Hz, 1H), 8.10 – 8.04 (m, 1H), 7.56 – 7.50 (m, 1H), 7.24 (t,  $J = 7.8$  Hz, 1H).

$^{13}\text{C NMR}$  (100 MHz,  $\text{CD}_3\text{OD}$ )  $\delta$  212.3, 147.7, 133.9, 132.2, 130.1, 127.8, 122.4.

**HRMS** (ESI)  $m/z$  calcd for  $\text{C}_7\text{H}_4\text{BrOS}$   $[\text{M} - \text{K}]^-$  214.9172, found: 214.9167.

#### Potassium 3,5-dimethylbenzothioate (**S15**)

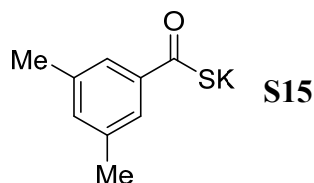

According to **General procedure 1** with 3,5-dimethylbenzoyl chloride (1.69 g, 10 mmol, 1.0 equiv.), yield the product **S15** as a yellow solid (1.68 g, 82% yield).

$^1\text{H NMR}$  (400 MHz,  $\text{CD}_3\text{OD}$ )  $\delta$  7.79 – 7.73 (m, 2H), 7.09 – 7.03 (m, 1H), 2.33 (d,  $J = 0.8$  Hz, 6H).

$^{13}\text{C NMR}$  (100 MHz,  $\text{CD}_3\text{OD}$ )  $\delta$  215.1, 145.8, 137.8, 132.8, 127.0, 21.3.

**HRMS** (ESI)  $m/z$  calcd for  $\text{C}_9\text{H}_9\text{K}_2\text{OS}$   $[\text{M} + \text{K}]^+$  242.9643, found: 242.9641.

#### Potassium thiophene-2-carbothioate (**S16**)

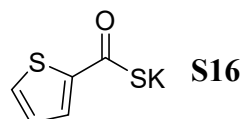

$^1\text{H NMR}$  (400 MHz,  $\text{CD}_3\text{OD}$ )  $\delta$  7.68 (dd,  $J = 3.7, 1.3$  Hz, 1H), 7.46 (dd,  $J = 5.0, 1.3$  Hz, 1H), 7.02 (dd,  $J = 5.0, 3.7$  Hz, 1H).

$^{13}\text{C NMR}$  (100 MHz,  $\text{CD}_3\text{OD}$ )  $\delta$  205.0, 153.2, 131.3, 130.0, 128.1.



**Potassium furan-2-carbothioate (S17)**

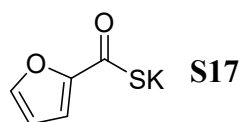

$^1\text{H NMR}$  (400 MHz,  $\text{CD}_3\text{OD}$ )  $\delta$  7.66 – 7.60 (m, 1H), 7.24 (dd,  $J = 3.5, 0.9$  Hz, 1H), 6.53 (dd,  $J = 3.4, 1.8$  Hz, 1H).

$^{13}\text{C NMR}$  (100 MHz,  $\text{CD}_3\text{OD}$ )  $\delta$  201.0, 157.9, 145.1, 116.0, 112.5.

**Potassium 2,2-dimethylpropanethioate (S18)**

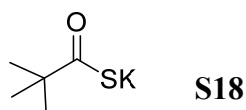

According to **General procedure 1** with pivaloyl chloride (1.21 g, 10 mmol, 1.0 equiv.), yield the product **S18** as a yellow solid (1.17 g, 75% yield).

$^1\text{H NMR}$  (400 MHz,  $\text{CD}_3\text{OD}$ )  $\delta$  1.36 (s, 9H).

$^{13}\text{C NMR}$  (100 MHz,  $\text{CD}_3\text{OD}$ )  $\delta$  230.2, 30.0, 28.5.

**HRMS** (ESI)  $m/z$  calcd for  $\text{C}_5\text{H}_9\text{K}_2\text{OS}$   $[\text{M} + \text{K}]^+$  194.9643, found: 194.9642.

### The structures and synthesis of sodium arylsulfonothioates:

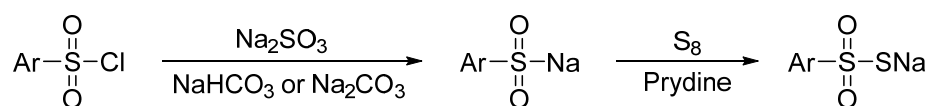

**S5-8**

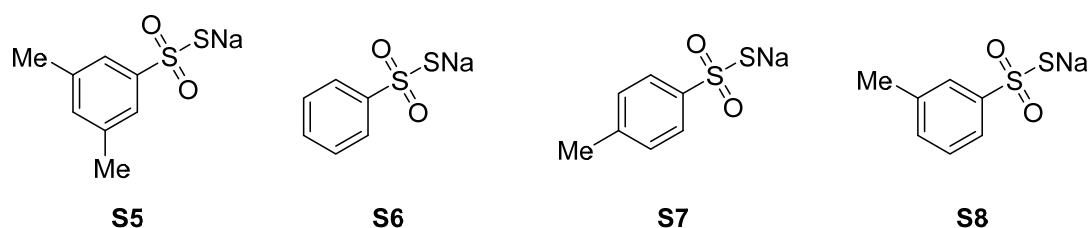

### General procedure 2:

Sodium sulfite (20.0 mmol, 2.0 equiv.), sodium bicarbonate or sodium carbonate (20.0 mmol, 2.0 equiv.) and the corresponding aryl sulfonyl chloride (10.0 mmol, 1.0 equiv.) were dissolved in distilled water (10.0 mL). The reaction mixture was stirred for 4 hours at 80 °C. After cooling down to room temperature, water was removed in vacuo. 50 mL of ethanol was then added to this white residue and the resulting heterogeneous solution was filtered. The filtrate was concentrated under reduced pressure and the desired sodium aryl sulfinates were obtained as white powders.

sodium aryl sulfinates (10.0 mmol, 1.0 equiv.) and S<sub>8</sub> (10.0 mmol, 1.0 equiv.) were dissolved in pyridine (8.0 mL) to give a yellow solution under argon. After the reaction was stirred 6 hours, 30.0 mL anhydrous diethyl ether was added, giving a white suspension, the reaction was filtered and washed with anhydrous diethyl ether. The residue was recrystallized from anhydrous ethanol to afford the desired compound as a white solid

*Note:* The sodium benzenesulfinate for the synthesis of substrate **S6** was commercially available, and the substrate **S6** was known compound and synthesized according to reported literature<sup>5</sup>.

### Sodium 3,5-dimethylbenzenesulfonothioate (S5)

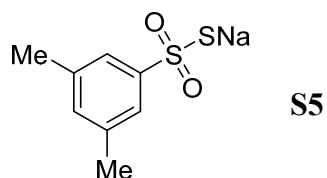

According to **General procedure 2** with 3,5-dimethylbenzenesulfonyl chloride (2.05 g, 10 mmol, 1.0 equiv.), yield the product **S5** as a white solid (2.02 g, 90% yield).

<sup>1</sup>H NMR (400 MHz, CD<sub>3</sub>OD) δ 7.63 (s, 2H), 7.13 (s, 1H), 2.40 (s, 6H).

<sup>13</sup>C NMR (100 MHz, CD<sub>3</sub>OD) δ 154.4, 139.1, 132.6, 123.1, 21.3.

HRMS (ESI) *m/z* calcd for C<sub>8</sub>H<sub>9</sub>O<sub>2</sub>S<sub>2</sub> [M – Na]<sup>–</sup> 201.0049, found: 201.0042

### Sodium benzenesulfonothioate (S6)

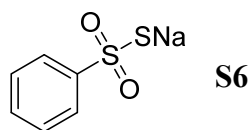

$^1\text{H NMR}$  (400 MHz,  $\text{CD}_3\text{OD}$ )  $\delta$  8.04 – 7.95 (m, 2H), 7.51 – 7.41 (m, 3H).

### Sodium 4-methylbenzenesulfonothioate (S7)

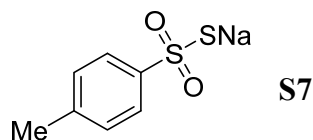

According to **General procedure 2** with 4-methylbenzenesulfonyl chloride (1.91 g, 10 mmol, 1.0 equiv.), yield the product **S7** as a white solid (1.85 g, 88% yield).

$^1\text{H NMR}$  (400 MHz,  $\text{CD}_3\text{OD}$ )  $\delta$  7.93 – 7.85 (m, 2H), 7.28 (d,  $J = 8.0$  Hz, 2H), 2.43 (s, 3H).

$^{13}\text{C NMR}$  (100 MHz,  $\text{CD}_3\text{OD}$ )  $\delta$  152.1, 141.7, 129.6, 125.6, 21.3.

**HRMS** (ESI)  $m/z$  calcd for  $\text{C}_7\text{H}_7\text{O}_2\text{S}_2$  [ $\text{M} - \text{Na}$ ] $^-$  186.9893, found: 186.9885.

### Sodium 3-methylbenzenesulfonothioate (S8)

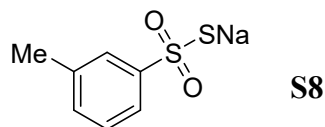

According to **General procedure 2** with 3-methylbenzenesulfonyl chloride (1.91 g, 10 mmol, 1.0 equiv.), yield the product **S8** as a white solid (1.93 g, 92% yield).

$^1\text{H NMR}$  (400 MHz,  $\text{CD}_3\text{OD}$ )  $\delta$  7.83 (s, 1H), 7.79 (d,  $J = 7.7$  Hz, 1H), 7.34 (t,  $J = 7.6$  Hz, 1H), 7.29 (d,  $J = 7.6$  Hz, 1H), 2.42 (s, 3H).

$^{13}\text{C NMR}$  (100 MHz,  $\text{CD}_3\text{OD}$ )  $\delta$  154.3, 139.2, 131.9, 129.0, 125.9, 122.6, 21.4.

**HRMS** (ESI)  $m/z$  calcd for  $\text{C}_7\text{H}_7\text{O}_2\text{S}_2$  [ $\text{M} - \text{Na}$ ] $^-$  186.9893, found: 186.9885.

## The structures and synthesis of benzyl electrophiles:

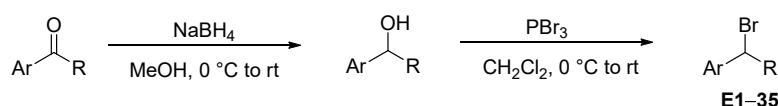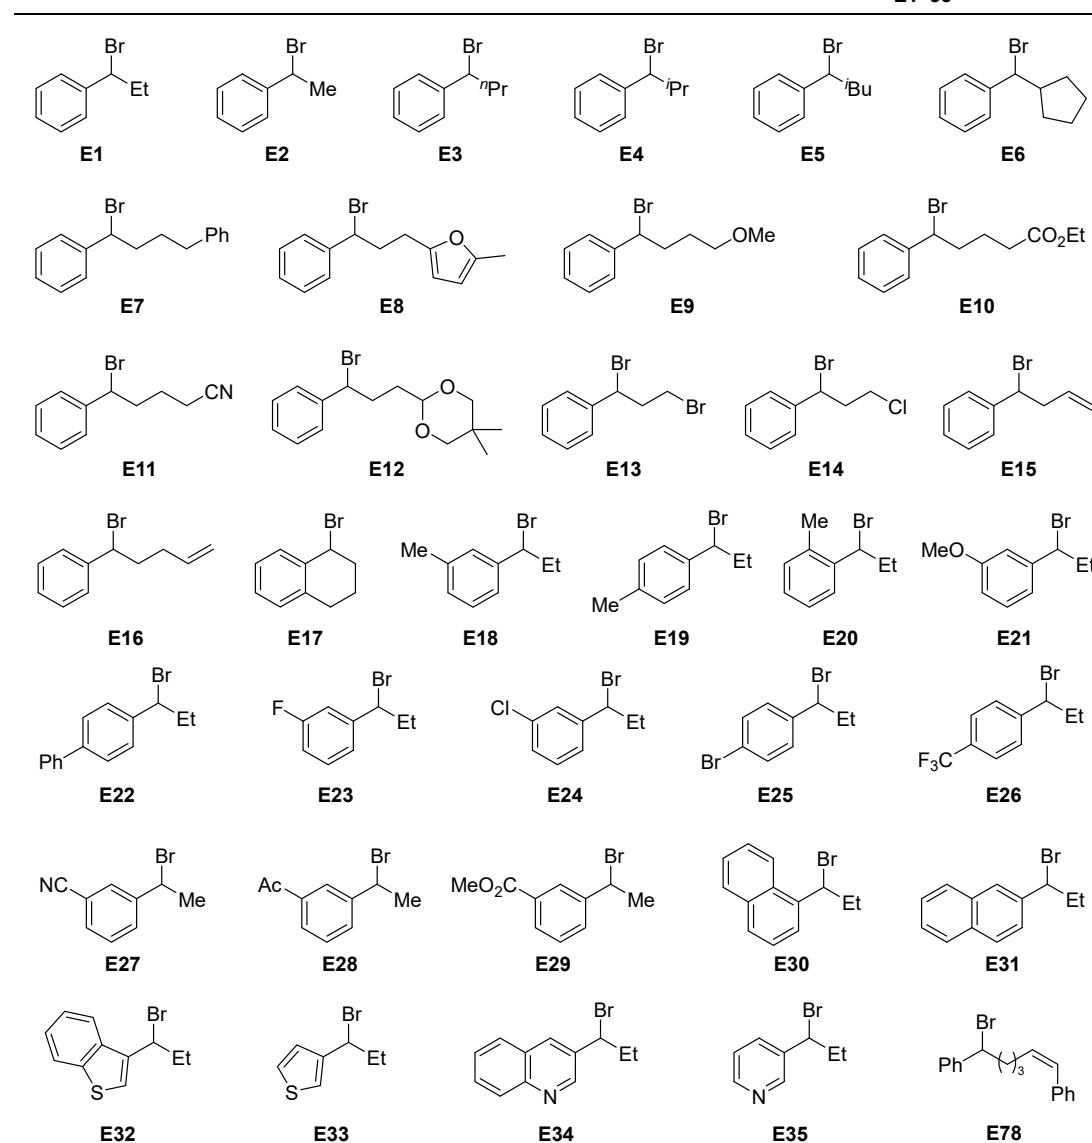

To a solution of ketone (3.0 mmol) in MeOH (9.0 mL) was added NaBH<sub>4</sub> (136.2 mg, 3.6 mmol) at ice bath and the reaction mixture was stirred at room temperature for 0.5–2 hours. After completion of reaction (monitored by TLC), the reaction was quenched by water, and the mixture was extracted with CH<sub>2</sub>Cl<sub>2</sub> three times. The combined organic phase was washed with brine, dried over Na<sub>2</sub>SO<sub>4</sub>, filtered and concentrated under reduced pressure to afford the corresponding alcohol. The crude product was purified by flash chromatography on silica gel to provide the desired product.

To a solution of the residue obtained above in CH<sub>2</sub>Cl<sub>2</sub> (9.0 mL) was added PBr<sub>3</sub> (0.20 mL, 2.1 mmol) under an argon atmosphere at ice water bath and the resulting reaction mixture was stirred at room temperature. After completion of reaction (monitored by TLC), the mixture was quenched by water at ice water bath, and the mixture was

extracted with CH<sub>2</sub>Cl<sub>2</sub> three times. The combined organic phase was washed by brine, dried over Na<sub>2</sub>SO<sub>4</sub>, filtered and concentrated under reduced pressure to afford the corresponding crude benzyl bromides, which was directly used in the next step without further purification or stored in a refrigerator.

*Note:* Benzyl bromide **E2** was purchased from Bide Pharmatech. The benzyl bromide **E1**, **E3–35**, **E78** were known compounds and synthesized according to reported literature<sup>6,7</sup>. The purities of crude benzyl bromides were determined by <sup>1</sup>H NMR spectroscopy using 1,3,5-trimethylbenzene or 1,1,1,2,2-pentachloroethane as an internal standard.

#### (1-Bromopropyl)benzene (**E1**)

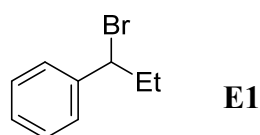

<sup>1</sup>H NMR (400 MHz, CDCl<sub>3</sub>) δ 7.45 – 7.40 (m, 2H), 7.40 – 7.34 (m, 2H), 7.34 – 7.29 (m, 1H), 4.91 (dd, *J* = 8.1, 6.8 Hz, 1H), 2.41 – 2.27 (m, 1H), 2.26 – 2.13 (m, 1H), 1.04 (t, *J* = 7.3 Hz, 3H).

#### (1-Bromobutyl)benzene (**E3**)

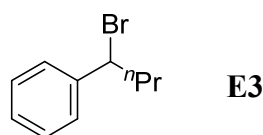

<sup>1</sup>H NMR (400 MHz, CDCl<sub>3</sub>) δ 7.42 – 7.36 (m, 2H), 7.36 – 7.30 (m, 2H), 7.30 – 7.24 (m, 1H), 4.97 (dd, *J* = 8.2, 6.9 Hz, 1H), 2.27 – 2.20 (m, 1H), 2.17 – 2.04 (m, 1H), 1.56 – 1.42 (m, 1H), 1.41 – 1.26 (m, 1H), 0.94 (t, *J* = 7.4 Hz, 3H).

#### (1-Bromo-2-methylpropyl)benzene (**E4**)

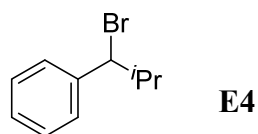

<sup>1</sup>H NMR (400 MHz, CDCl<sub>3</sub>) δ 7.38 – 7.28 (m, 4H), 7.28 – 7.21 (m, 1H), 4.71 (d, *J* = 8.5 Hz, 1H), 2.37 – 2.29 (m, 1H), 1.18 (d, *J* = 6.6 Hz, 3H), 0.85 (d, *J* = 6.7 Hz, 3H).

#### (1-Bromo-3-methylbutyl)benzene (**E5**)

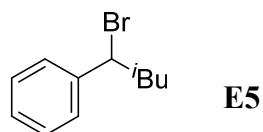

$^1\text{H NMR}$  (400 MHz,  $\text{CDCl}_3$ )  $\delta$  7.44 – 7.37 (m, 2H), 7.36 – 7.30 (m, 2H), 7.30 – 7.24 (m, 1H), 5.04 (dd,  $J = 8.5, 7.1$  Hz, 1H), 2.25 – 2.15 (m, 1H), 2.04 – 1.92 (m, 1H), 1.77 – 1.63 (m, 1H), 0.93 (t,  $J = 6.6$  Hz, 6H).

**(Bromo(cyclopentyl)methyl)benzene (E6)**

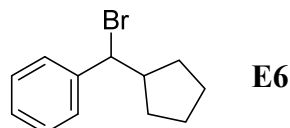

$^1\text{H NMR}$  (400 MHz,  $\text{CDCl}_3$ )  $\delta$  7.41 – 7.35 (m, 2H), 7.34 – 7.28 (m, 2H), 7.28 – 7.23 (m, 1H), 4.77 (d,  $J = 10.2$  Hz, 1H), 2.81 – 2.65 (m, 1H), 2.17 – 2.08 (m, 1H), 1.74 – 1.44 (m, 6H), 1.11 – 0.99 (m, 1H).

**(1-Bromobutane-1,4-diyl)dibenzene (E7)**

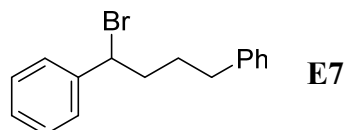

$^1\text{H NMR}$  (400 MHz,  $\text{CDCl}_3$ )  $\delta$  7.39 – 7.26 (m, 6H), 7.25 – 7.21 (m, 1H), 7.20 – 7.11 (m, 3H), 4.95 (dd,  $J = 8.1, 6.9$  Hz, 1H), 2.64 (t,  $J = 7.6$  Hz, 2H), 2.37 – 2.31 (m, 1H), 2.21 – 2.11 (m, 1H), 1.90 – 1.77 (m, 2H), 1.70 – 1.56 (m, 1H).

**2-(3-Bromo-3-phenylpropyl)-5-methylfuran (E8)**

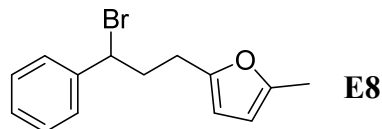

$^1\text{H NMR}$  (400 MHz,  $\text{CDCl}_3$ )  $\delta$  7.41 – 7.36 (m, 2H), 7.35 – 7.27 (m, 3H), 5.90 – 5.78 (m, 2H), 4.94 (dd,  $J = 8.3, 6.4$  Hz, 1H), 2.74 – 2.66 (m, 2H), 2.61 – 2.52 (m, 1H), 2.50 – 2.37 (m, 1H), 2.24 (s, 3H).

**(1-Bromo-4-methoxybutyl)benzene (E9)**

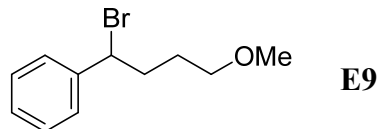

$^1\text{H NMR}$  (400 MHz,  $\text{CDCl}_3$ )  $\delta$  7.49 – 7.42 (m, 2H), 7.42 – 7.29 (m, 3H), 5.02 (dd,  $J = 8.3, 6.7$  Hz, 1H), 3.50 – 3.39 (m, 2H), 3.35 (s, 3H), 2.45 – 2.35 (m, 1H), 2.31 – 2.22 (m, 1H), 1.88 – 1.76 (m, 1H), 1.70 – 1.61 (m, 1H).

**Ethyl 5-bromo-5-phenylpentanoate (E10)**

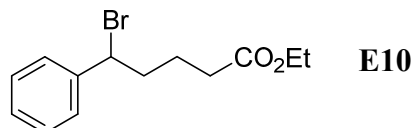

$^1\text{H NMR}$  (400 MHz,  $\text{CDCl}_3$ )  $\delta$  7.44 – 7.25 (m, 5H), 4.95 (dd,  $J = 8.2, 6.7$  Hz, 1H), 4.12 (q,  $J = 7.1$  Hz, 2H), 2.33 (t,  $J = 7.3$  Hz, 3H), 2.24 – 2.11 (m, 1H), 1.91 – 1.77 (m, 1H), 1.71 – 1.57 (m, 1H), 1.24 (t,  $J = 7.1$  Hz, 3H).

### 5-Bromo-5-phenylpentanenitrile (E11)

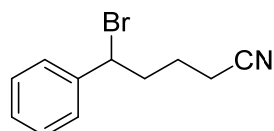

**E11**

$^1\text{H NMR}$  (400 MHz,  $\text{CDCl}_3$ )  $\delta$  7.41 – 7.32 (m, 4H), 7.32 – 7.27 (m, 1H), 4.93 (dd,  $J = 8.6, 6.3$  Hz, 1H), 2.46 – 2.34 (m, 3H), 2.32 – 2.28 (m, 1H), 1.99 – 1.85 (m, 1H), 1.76 – 1.62 (m, 1H).

### 2-(3-Bromo-3-phenylpropyl)-5,5-dimethyl-1,3-dioxane (E12)

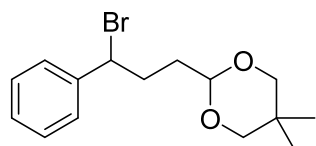

**E12**

$^1\text{H NMR}$  (400 MHz,  $\text{CDCl}_3$ )  $\delta$  7.41 – 7.36 (m, 2H), 7.36 – 7.29 (m, 2H), 7.29 – 7.25 (m, 1H), 4.99 (dd,  $J = 8.4, 6.7$  Hz, 1H), 4.45 (t,  $J = 4.7$  Hz, 1H), 3.62 – 3.53 (m, 2H), 3.39 (d,  $J = 11.1$  Hz, 2H), 2.47 – 2.36 (m, 1H), 2.36 – 2.29 (m, 1H), 1.91 – 1.78 (m, 1H), 1.72 – 1.61 (m, 1H), 1.17 (s, 3H), 0.71 (s, 3H).

### (1,3-Dibromopropyl)benzene (E13)

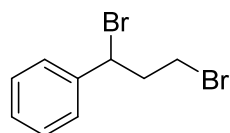

**E13**

$^1\text{H NMR}$  (400 MHz,  $\text{CDCl}_3$ )  $\delta$  7.43 – 7.38 (m, 2H), 7.38 – 7.27 (m, 3H), 5.24 – 5.13 (m, 1H), 3.61 – 3.48 (m, 1H), 3.46 – 3.34 (m, 1H), 2.84 – 2.68 (m, 1H), 2.63 – 2.48 (m, 1H).

### (1-Bromo-3-chloropropyl)benzene (E14)

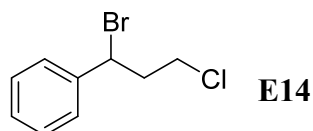

**E14**

$^1\text{H NMR}$  (400 MHz,  $\text{CDCl}_3$ )  $\delta$  7.43 – 7.37 (m, 2H), 7.37 – 7.30 (m, 3H), 5.20 (dd,  $J = 9.0, 5.7$  Hz, 1H), 3.74 – 3.66 (m, 1H), 3.59 – 3.52 (m, 1H), 2.76 – 2.62 (m, 1H), 2.52 – 2.40 (m, 1H).

**(1-Bromobut-3-en-1-yl)benzene (E15)**

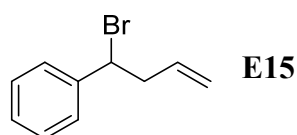

$^1\text{H NMR}$  (400 MHz,  $\text{CDCl}_3$ )  $\delta$  7.42 – 7.37 (m, 2H), 7.37 – 7.31 (m, 2H), 7.31 – 7.25 (m, 1H), 5.82 – 5.65 (m, 1H), 5.17 – 5.05 (m, 2H), 4.95 (t,  $J = 7.5$  Hz, 1H), 3.11 – 2.85 (m, 2H).

**(1-Bromopent-4-en-1-yl)benzene (E16)**

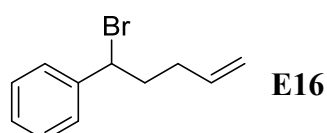

$^1\text{H NMR}$  (400 MHz,  $\text{CDCl}_3$ )  $\delta$  7.42 – 7.36 (m, 2H), 7.36 – 7.24 (m, 3H), 5.84 – 5.70 (m, 1H), 5.09 – 4.99 (m, 2H), 4.95 (dd,  $J = 8.4, 5.7$  Hz, 1H), 2.46 – 2.33 (m, 1H), 2.24 – 2.03 (m, 3H).

**1-Bromo-1,2,3,4-tetrahydronaphthalene (E17)**

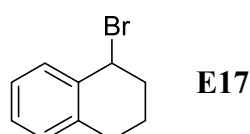

$^1\text{H NMR}$  (400 MHz,  $\text{CDCl}_3$ )  $\delta$  7.37 – 7.32 (m, 1H), 7.21 – 7.12 (m, 2H), 7.09 – 7.03 (m, 1H), 5.60 (t,  $J = 3.6$  Hz, 1H), 2.94 (ddd, 1H), 2.85 (ddd,  $J = 17.1, 11.1, 5.8$  Hz, 1H), 2.47 – 2.36 (m, 1H), 2.34 – 2.20 (m, 1H), 2.20 – 2.09 (m, 1H), 1.96 – 1.85 (m, 1H).

**1-(1-Bromopropyl)-3-methylbenzene (E18)**

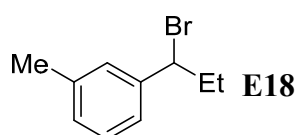

$^1\text{H NMR}$  (400 MHz,  $\text{CDCl}_3$ )  $\delta$  7.22 – 7.14 (m, 3H), 7.11 – 7.04 (m, 1H), 4.84 (dd,  $J = 8.1, 6.8$  Hz, 1H), 2.36 – 2.33 (m, 4H), 2.19 – 2.11 (m, 1H), 0.99 (t,  $J = 7.3$  Hz, 3H).

**1-(1-Bromopropyl)-4-methylbenzene (E19)**

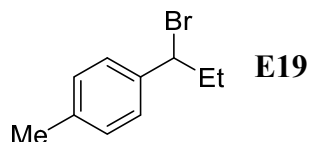

$^1\text{H NMR}$  (400 MHz,  $\text{CDCl}_3$ )  $\delta$  7.30 – 7.24 (m, 2H), 7.15 – 7.12 (m, 2H), 4.87 (t,  $J = 7.4$  Hz, 1H), 2.33 (s, 3H), 2.20 – 2.08 (m, 1H), 1.88 – 1.83 (m, 1H), 0.99 (t,  $J = 7.3$  Hz, 3H).



### 1-(1-Bromopropyl)-2-methylbenzene (E20)

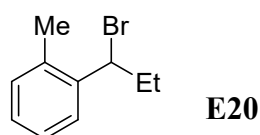

$^1\text{H NMR}$  (400 MHz,  $\text{CDCl}_3$ )  $\delta$  7.23 – 7.14 (m, 3H), 7.11 – 7.06 (m, 1H), 4.85 (dd,  $J = 8.2, 6.7$  Hz, 1H), 2.35 (s, 3H), 2.33 – 2.29 (m, 1H), 2.18 – 2.13 (m, 1H), 1.00 (t,  $J = 7.3$  Hz, 3H).

### 1-(1-Bromopropyl)-3-methoxybenzene (E21)

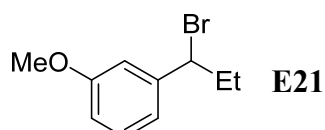

$^1\text{H NMR}$  (400 MHz,  $\text{CDCl}_3$ )  $\delta$  7.27 – 7.22 (m, 1H), 6.99 – 6.95 (m, 1H), 6.93 (t, 1H), 6.84 – 6.80 (m, 1H), 4.84 (dd,  $J = 8.0, 6.7$  Hz, 1H), 3.81 (s, 3H), 2.27 – 2.21 (m, 1H), 2.21 – 2.09 (m, 1H), 1.00 (t,  $J = 7.3$  Hz, 3H).

### 4-(1-Bromopropyl)-1,1'-biphenyl (E22)

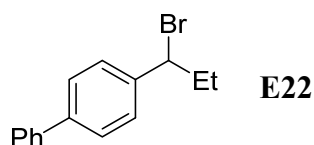

$^1\text{H NMR}$  (400 MHz,  $\text{CDCl}_3$ )  $\delta$  7.59 – 7.54 (m, 4H), 7.46 – 7.41 (m, 4H), 7.37 – 7.31 (m, 1H), 4.93 (dd,  $J = 8.1, 6.7$  Hz, 1H), 2.37 – 2.29 (m, 1H), 2.25 – 2.14 (m, 1H), 1.03 (t,  $J = 7.2$  Hz, 3H).

### 1-(1-Bromopropyl)-3-fluorobenzene (E23)

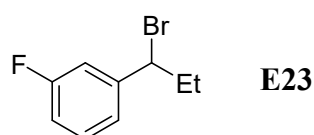

$^1\text{H NMR}$  (400 MHz,  $\text{CDCl}_3$ )  $\delta$  7.34 – 7.24 (m, 1H), 7.19 – 7.07 (m, 2H), 7.00 – 6.93 (m, 1H), 4.88 – 4.76 (m, 1H), 2.33 – 2.20 (m, 1H), 2.20 – 2.08 (m, 1H), 1.00 (t,  $J = 7.3$  Hz, 3H).

### 1-(1-Bromopropyl)-3-chlorobenzene (E24)

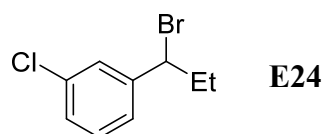

$^1\text{H NMR}$  (400 MHz,  $\text{CDCl}_3$ )  $\delta$  7.39 – 7.37 (m, 1H), 7.27 – 7.25 (m, 3H), 4.80 (dd,  $J = 8.1, 6.8$  Hz, 1H), 2.32 – 2.20 (m, 1H), 2.19 – 2.07 (m, 1H), 1.00 (t,  $J = 7.3$  Hz, 3H).

**1-Bromo-4-(1-bromopropyl)benzene (E25)**

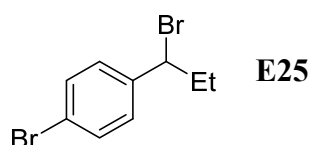

$^1\text{H NMR}$  (400 MHz,  $\text{CDCl}_3$ )  $\delta$  7.49 – 7.45 (m, 2H), 7.29 – 7.26 (m, 2H), 4.85 – 4.79 (m, 1H), 2.32 – 2.20 (m, 1H), 2.20 – 2.07 (m, 1H), 0.99 (t,  $J = 7.2$  Hz, 3H).

**1-(1-Bromopropyl)-4-(trifluoromethyl)benzene (E26)**

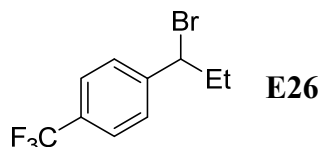

$^1\text{H NMR}$  (400 MHz,  $\text{CDCl}_3$ )  $\delta$  7.60 (d,  $J = 8.2$  Hz, 2H), 7.49 (d,  $J = 8.2$  Hz, 2H), 4.86 (dd,  $J = 8.1, 6.7$  Hz, 1H), 2.34 – 2.28 (m, 1H), 2.21 – 2.08 (m, 1H), 1.01 (t,  $J = 7.3$  Hz, 3H).

**1-(1-Bromoethyl)-3-isocyanobenzene (E27)**

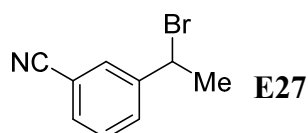

$^1\text{H NMR}$  (400 MHz,  $\text{CDCl}_3$ )  $\delta$  7.72 (t,  $J = 1.8$  Hz, 1H), 7.67 (dt,  $J = 7.8, 1.6$  Hz, 1H), 7.57 (dt,  $J = 7.7, 1.4$  Hz, 1H), 7.46 (t,  $J = 7.8$  Hz, 1H), 5.15 (q,  $J = 6.9$  Hz, 1H), 2.03 (d,  $J = 6.9$  Hz, 3H).

**1-(3-(1-Bromoethyl)phenyl)ethan-1-one (E28)**

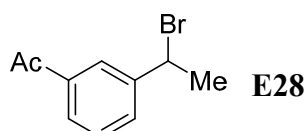

$^1\text{H NMR}$  (400 MHz,  $\text{CDCl}_3$ )  $\delta$  8.01 (t,  $J = 1.9$  Hz, 1H), 7.87 (dt,  $J = 7.7, 1.5$  Hz, 1H), 7.65 (dt,  $J = 7.8, 1.5$  Hz, 1H), 7.45 (t,  $J = 7.7$  Hz, 1H), 5.23 (q,  $J = 7.0$  Hz, 1H), 2.61 (s, 3H), 2.06 (d,  $J = 7.0$  Hz, 3H).

**Methyl 3-(1-bromoethyl)benzoate (E29)**

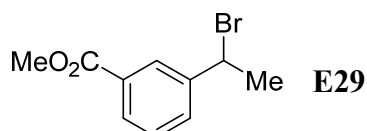

$^1\text{H NMR}$  (400 MHz,  $\text{CDCl}_3$ )  $\delta$  8.10 (d,  $J = 1.9$  Hz, 1H), 7.96 (dt,  $J = 7.8, 1.4$  Hz, 1H), 7.63 (dt,  $J = 7.8, 1.5$  Hz, 1H), 7.42 (t,  $J = 7.8$  Hz, 1H), 5.22 (q,  $J = 6.9$  Hz, 1H), 3.93 (s, 3H), 2.06 (d,  $J = 6.9$  Hz, 3H).

### 1-(1-Bromopropyl)naphthalene (E30)

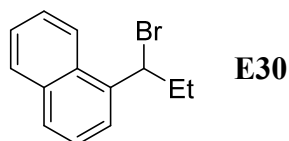

$^1\text{H NMR}$  (400 MHz,  $\text{CDCl}_3$ )  $\delta$  8.25 (d,  $J = 8.6$  Hz, 1H), 7.93 (dd,  $J = 8.2, 1.4$  Hz, 1H), 7.87 (d,  $J = 8.2$  Hz, 1H), 7.76 (d,  $J = 7.3$  Hz, 1H), 7.68 – 7.61 (m, 1H), 7.59 – 7.48 (m, 2H), 5.75 (t,  $J = 7.3$  Hz, 1H), 2.67 – 2.54 (m, 1H), 2.52 – 2.40 (m, 1H), 1.19 (t,  $J = 7.2$  Hz, 3H).

### 2-(1-Bromopropyl)naphthalene (E31)

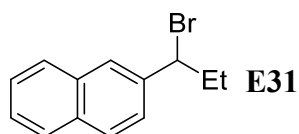

$^1\text{H NMR}$  (400 MHz,  $\text{CDCl}_3$ )  $\delta$  7.88 – 7.81 (m, 4H), 7.61 – 7.57 (m, 1H), 7.54 – 7.51 (m, 2H), 5.10 (t,  $J = 7.4$  Hz, 1H), 2.51 – 2.39 (m, 1H), 2.37 – 2.33 (m, 1H), 1.07 (t,  $J = 7.3$  Hz, 3H).

### 3-(1-Bromopropyl)benzo[b]thiophene (E32)

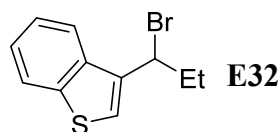

$^1\text{H NMR}$  (400 MHz,  $\text{CDCl}_3$ )  $\delta$  7.96 – 7.91 (m, 1H), 7.87 – 7.83 (m, 1H), 7.47 (s, 1H), 7.46 – 7.41 (m, 1H), 7.40 – 7.35 (m, 1H), 5.31 – 5.24 (m, 1H), 2.49 – 2.37 (m, 2H), 1.13 (t,  $J = 7.3$  Hz, 3H).

### 3-(1-Bromopropyl)thiophene (E33)

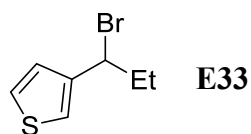

$^1\text{H NMR}$  (400 MHz,  $\text{CDCl}_3$ )  $\delta$  7.33 – 7.27 (m, 1H), 7.25 – 7.20 (m, 1H), 7.14 (d,  $J = 5.1$  Hz, 1H), 5.02 (t,  $J = 7.3$  Hz, 1H), 2.25 – 2.14 (m, 2H), 1.02 (t,  $J = 7.3$  Hz, 3H).

### 3-(1-Bromopropyl)quinoline (E34)

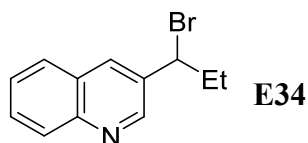

$^1\text{H NMR}$  (400 MHz,  $\text{CDCl}_3$ )  $\delta$  8.99 (s, 1H), 8.20 – 8.11 (m, 2H), 7.85 (dd,  $J = 8.2, 1.4$  Hz, 1H), 7.80 – 7.71 (m, 1H), 7.64 – 7.56 (m, 1H), 5.09 (dd,  $J = 8.2, 6.7$  Hz, 1H), 2.53 – 2.40 (m, 1H), 2.40 – 2.23 (m, 1H), 1.10 (t,  $J = 7.2$  Hz, 3H).

### 3-(1-Bromopropyl)pyridine (E35)

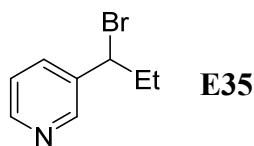

$^1\text{H NMR}$  (400 MHz,  $\text{CDCl}_3$ )  $\delta$  8.61 (d,  $J = 2.4$  Hz, 1H), 8.57 – 8.46 (m, 1H), 7.75 (dt,  $J = 8.0, 2.0$  Hz, 1H), 7.30 (dd,  $J = 8.0, 4.8$  Hz, 1H), 4.87 (t,  $J = 7.4$  Hz, 1H), 2.40 – 2.24 (m, 1H), 2.16 (dp,  $J = 14.2, 7.1$  Hz, 1H), 1.09 – 0.97 (m, 3H).

### (Z)-(6-Bromohex-1-ene-1,6-diyl)dibenzene (E78)

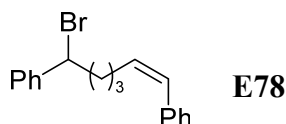

$^1\text{H NMR}$  (400 MHz,  $\text{CDCl}_3$ )  $\delta$  7.36 – 7.30 (m, 7H), 7.28 – 7.25 (m, 2H), 7.23 – 7.21 (m, 2H), 6.43 (d,  $J = 11.5$  Hz, 1H), 5.65 – 5.55 (m, 1H), 4.90 (t,  $J = 7.5$  Hz, 1H), 2.38 – 2.33 (m, 2H), 1.98 – 1.87 (m, 1H), 1.82 – 1.71 (m, 1H), 1.70 – 1.56 (m, 2H), 1.50 – 1.40 (m, 1H).

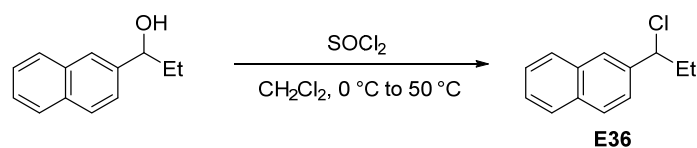

In a vacuum dried 50 mL round bottomed flask, 1-(naphthalen-2-yl)propan-1-ol (0.93 g, 5.0 mmol) was dissolved in dry  $\text{CH}_2\text{Cl}_2$  (12.0 mL). Then, thionyl chloride (1.81 mL, 25.0 mmol) was added at 0 °C under argon atmosphere. Then, the reaction mixture was warmed to 50 °C. After stirred for 3 hours, the solvent and the unreacted thionyl chloride were removed by evaporation. The residue was quenched by saturated aqueous  $\text{NaHCO}_3$  (1.0 mL) and  $\text{H}_2\text{O}$  (20.0 mL), and then extracted with EtOAc three times (20.0 mL  $\times$  3). The combined organic layer was then dried over  $\text{Na}_2\text{SO}_4$ . After filtration, the solvent was removed by rotary evaporator to obtain the corresponding chloride product **E36** (1.05 g, 90% yield) as a pale yellow oil.

*Note:* The substrate **E36** was known compound and synthesized according to reported literature<sup>8</sup>.

### 2-(1-Chloropropyl)naphthalene (E36)

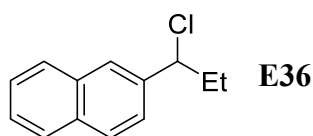

$^1\text{H NMR}$  (400 MHz,  $\text{CDCl}_3$ )  $\delta$  7.84 – 7.73 (m, 4H), 7.53 – 7.42 (m, 3H), 4.93 (t,  $J = 7.0$  Hz, 1H), 2.31 – 2.05 (m, 2H), 0.99 (t,  $J = 7.3$  Hz, 3H).

## The structures and synthesis of propargyl electrophiles:

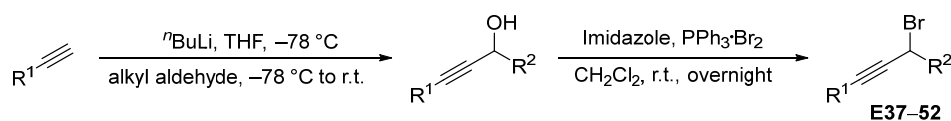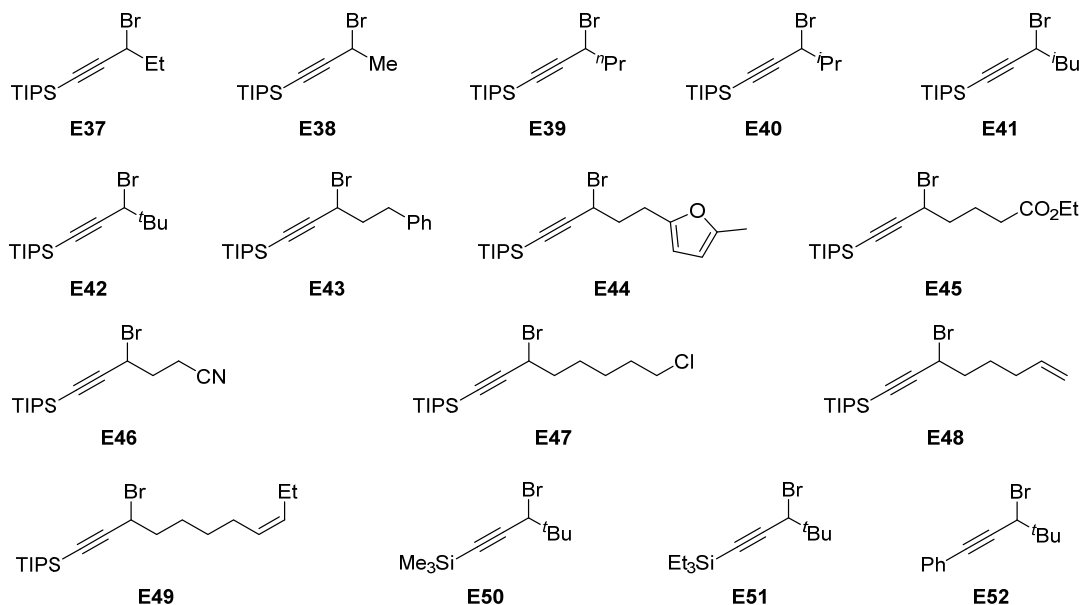

*n*BuLi (2.4 M in hexane, 1.3 equiv.) was added dropwise into a solution of alkynes (1.3 equiv.) in anhydrous THF (1.0 M) at  $-78\text{ }^\circ\text{C}$ . The mixture was stirred at room temperature for 30 min and cooled to  $-78\text{ }^\circ\text{C}$ . Aldehyde (1.0 equiv.) was added dropwise. Then the mixture was warmed up to room temperature and stirred for overnight. The mixture was quenched by a saturated  $\text{NH}_4\text{Cl}$  aqueous solution, extracted with EtOAc, and dried over  $\text{Na}_2\text{SO}_4$ . The organic phase was concentrated under reduced pressure and then subjected to flash chromatography to afford the desired product.

Under an argon atmosphere, to a solution of imidazole (1.2 equiv.) in dry  $\text{CH}_2\text{Cl}_2$  (1.0 M) was added propargyl alcohol (1.0 equiv.). The solution was stirred for 15 min, followed by the addition of dibromotriphenylphosphorane (1.2 equiv.). The reaction mixture was stirred at room temperature overnight. Then the reaction was quenched by the addition of silica gel. The solvent was removed under reduced pressure, and then the plug of silica gel was subjected to flash chromatography to afford the desired product.

*Note:* The substrates **E37–44**, **E46**, **E48**, **E49** were known compounds and synthesized according to reported literature<sup>9</sup>. The substrate **E52** was known compound and synthesized according to reported literature<sup>10</sup>.

### (3-Bromopent-1-yn-1-yl)triisopropylsilane (E37)

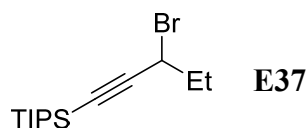

$^1\text{H NMR}$  (400 MHz,  $\text{CDCl}_3$ )  $\delta$  4.53 (t,  $J = 6.3$  Hz, 1H), 2.08 – 1.98 (m, 2H), 1.12 (t,  $J = 7.3$  Hz, 3H), 1.09 – 1.05 (m, 21H).

**(3-Bromobut-1-yn-1-yl)triisopropylsilane (E38)**

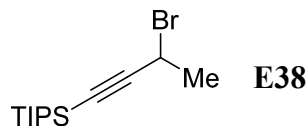

$^1\text{H NMR}$  (400 MHz,  $\text{CDCl}_3$ )  $\delta$  4.63 (q,  $J = 6.9$  Hz, 1H), 1.91 (d,  $J = 6.8$  Hz, 3H), 1.07 (s, 21H).

**(3-Bromohex-1-yn-1-yl)triisopropylsilane (E39)**

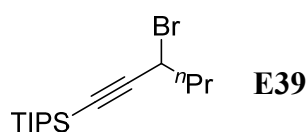

$^1\text{H NMR}$  (400 MHz,  $\text{CDCl}_3$ )  $\delta$  4.57 (t,  $J = 6.8$  Hz, 1H), 2.07 – 1.95 (m, 2H), 1.66 – 1.58 (m, 2H), 1.10 (d,  $J = 1.2$  Hz, 21H), 0.98 (t,  $J = 7.4$  Hz, 3H).

**(3-Bromo-4-methylpent-1-yn-1-yl)triisopropylsilane (E40)**

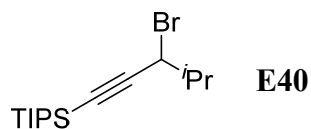

$^1\text{H NMR}$  (400 MHz,  $\text{CDCl}_3$ )  $\delta$  4.54 (d,  $J = 4.4$  Hz, 1H), 2.13 – 2.03 (m, 1H), 1.15 (d,  $J = 6.7$  Hz, 6H), 1.10 (s, 21H).

**(3-Bromo-5-methylhex-1-yn-1-yl)triisopropylsilane (E41)**

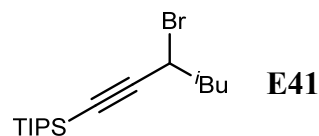

$^1\text{H NMR}$  (400 MHz,  $\text{CDCl}_3$ )  $\delta$  4.55 (t,  $J = 7.4$  Hz, 1H), 1.97 – 1.86 (m, 3H), 1.08 – 1.00 (m, 21H), 0.94 (d,  $J = 6.3$  Hz, 6H).

**(3-Bromohept-1-yn-1-yl)triisopropylsilane (E42)**

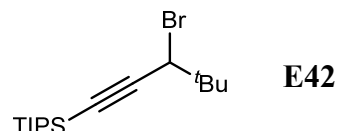

$^1\text{H NMR}$  (400 MHz,  $\text{CDCl}_3$ )  $\delta$  4.39 (s, 1H), 1.15 (s, 9H), 1.08 (s, 21H).

**(3-Bromo-5-phenylpent-1-yn-1-yl)triisopropylsilane (E43)**

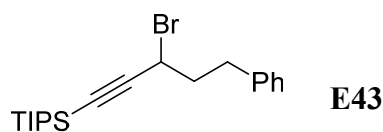

$^1\text{H NMR}$  (400 MHz,  $\text{CDCl}_3$ )  $\delta$  7.33 – 7.26 (m, 2H), 7.24 – 7.17 (m, 3H), 4.49 (t,  $J$  = 6.8 Hz, 1H), 2.88 (t,  $J$  = 7.7 Hz, 2H), 2.36 – 2.27 (m, 2H), 1.09 (s, 21H).

**(3-Bromo-5-(5-methylfuran-2-yl)pent-1-yn-1-yl)triisopropylsilane (E44)**

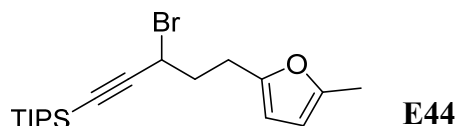

$^1\text{H NMR}$  (400 MHz,  $\text{CDCl}_3$ )  $\delta$  5.95 – 5.79 (m, 2H), 4.53 (t,  $J$  = 6.8 Hz, 1H), 2.84 (t,  $J$  = 7.4 Hz, 2H), 2.35 – 2.27 (m, 2H), 2.25 (d,  $J$  = 1.0 Hz, 3H), 1.08 (s, 21H).

**Ethyl 5-bromo-7-(triisopropylsilyl)hept-6-ynoate (E45)**

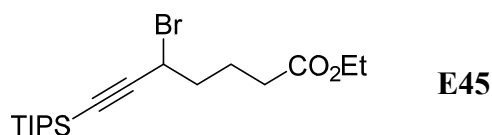

According to **General procedure 3**, ethyl 5-oxopentanoate (2.70 g, 18.7 mmol, 1.0 equiv.) with ethynyltriisopropylsilane (4.43 g, 24.3 mmol, 1.3 equiv.). The reaction mixture was purified by column chromatography on silica gel (petroleum ether/EtOAc = 75/1) to yield the product as a colorless oil (2.62 g, 36% yield over two steps).

$^1\text{H NMR}$  (400 MHz,  $\text{CDCl}_3$ )  $\delta$  4.56 (t,  $J$  = 6.5 Hz, 1H), 4.14 (q,  $J$  = 7.1 Hz, 2H), 2.37 (t,  $J$  = 7.3 Hz, 2H), 2.10 – 2.01 (m, 2H), 1.96 – 1.84 (m, 2H), 1.26 (t,  $J$  = 7.2 Hz, 3H), 1.13 – 0.99 (m, 21H).

$^{13}\text{C NMR}$  (100 MHz,  $\text{CDCl}_3$ )  $\delta$  173.0, 105.5, 89.3, 60.5, 39.0, 36.8, 33.4, 22.9, 18.7, 14.3, 11.2.

**HRMS** (ESI)  $m/z$  calcd. For  $\text{C}_{18}\text{H}_{34}\text{BrO}_2\text{Si}$  [ $\text{M} + \text{H}$ ] $^+$  389.1506, found 389.1506.

**4-Bromo-6-(triisopropylsilyl)hex-5-ynenitrile (E46)**

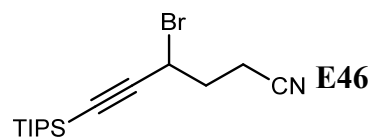

$^1\text{H NMR}$  (400 MHz,  $\text{CDCl}_3$ )  $\delta$  4.68 (t,  $J$  = 6.1 Hz, 1H), 2.67 (td,  $J$  = 7.4, 2.0 Hz, 2H), 2.39 – 2.32 (m, 2H), 1.09 – 1.06 (m, 21H).

**(3-Bromo-8-chlorooct-1-yn-1-yl)triisopropylsilane (E47)**

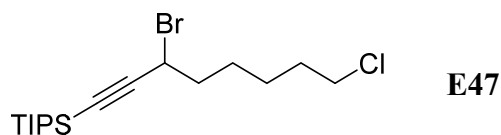

According to **General procedure 3**, 6-chlorohexanal (0.67 g, 5 mmol, 1.0 equiv.) with ethynyltriisopropylsilane (1.19 g, 6.5 mmol, 1.3 equiv.), the reaction mixture was purified by column chromatography on silica gel (petroleum ether) to yield the product as a colorless oil (0.21 g, 11% yield over two steps).

$^1\text{H NMR}$  (400 MHz,  $\text{CDCl}_3$ )  $\delta$  4.55 (t,  $J = 6.6$  Hz, 1H), 3.54 (t, 2H), 2.07 – 1.98 (m, 2H), 1.85 – 1.75 (m, 2H), 1.64 – 1.45 (m, 4H), 1.07 (s, 21H).

$^{13}\text{C NMR}$  (100 MHz,  $\text{CDCl}_3$ )  $\delta$  105.8, 89.0, 44.9, 39.7, 37.3, 32.5, 26.7, 26.1, 18.7, 11.3.

**HRMS** (ESI)  $m/z$  calcd. For  $\text{C}_{17}\text{H}_{33}\text{BrClSi}$   $[\text{M} + \text{H}]^+$  379.1218, found 379.1206.

### (3-Bromo-7-en-1-yn-1-yl)triisopropylsilane (E48)

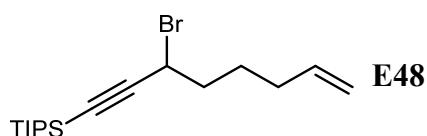

$^1\text{H NMR}$  (400 MHz,  $\text{CDCl}_3$ )  $\delta$  5.84 – 5.74 (m, 1H), 5.06 – 4.96 (m, 2H), 4.56 (t,  $J = 6.7$  Hz, 1H), 2.14 – 2.07 (m, 2H), 2.05 – 1.99 (m, 2H), 1.71 – 1.63 (m, 2H), 1.07 (s, 21H).

### (Z)-(3-bromoundec-8-en-1-yn-1-yl)triisopropylsilane (E49)

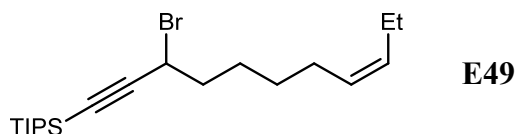

$^1\text{H NMR}$  (400 MHz,  $\text{CDCl}_3$ )  $\delta$  5.41 – 5.27 (m, 2H), 4.54 (t,  $J = 6.7$  Hz, 1H), 2.08 – 1.98 (m, 6H), 1.60 – 1.54 (m, 2H), 1.43 – 1.35 (m, 2H), 1.07 (s, 21H), 0.96 (t,  $J = 7.5$  Hz, 3H).

### (3-Bromo-4,4-dimethylpent-1-yn-1-yl)trimethylsilane (E50)

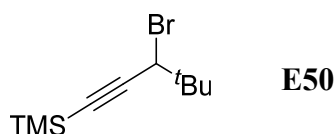

According to **General procedure 3**, pivalaldehyde (1.66 g, 19.3 mmol, 1.0 equiv.) with ethynyltrimethylsilane (2.46 g, 25.1 mmol, 1.3 equiv.), the reaction mixture was purified by column chromatography on silica gel (petroleum ether) to yield the product as a colorless oil (0.86 g, 18% yield over two steps).

$^1\text{H NMR}$  (400 MHz,  $\text{CDCl}_3$ )  $\delta$  4.35 (s, 1H), 1.13 (s, 9H), 0.18 (s, 9H).

$^{13}\text{C NMR}$  (100 MHz,  $\text{CDCl}_3$ )  $\delta$  103.1, 92.8, 51.4, 36.6, 26.9, –0.1.

**HRMS** (ESI)  $m/z$  calcd. For  $\text{C}_{10}\text{H}_{19}\text{BrNaSi}$   $[\text{M} + \text{Na}]^+$  269.0332, found 269.0331.



**(3-Bromo-4,4-dimethylpent-1-yn-1-yl)triethylsilane (E51)**

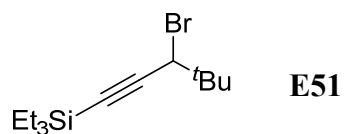

According to **General procedure 3**, pivalaldehyde (0.89 g, 10.3 mmol, 1.0 equiv.) with triethyl(ethynyl)silane (1.88 g, 13.4 mmol, 1.3 equiv.), the reaction mixture was purified by column chromatography on silica gel (petroleum ether) to yield the product as a colorless oil (0.83g, 28% yield over two steps).

$^1\text{H NMR}$  (400 MHz,  $\text{CDCl}_3$ )  $\delta$  4.37 (s, 1H), 1.14 (s, 9H), 1.00 (t,  $J = 7.9$  Hz, 9H), 0.61 (q,  $J = 7.9$  Hz, 6H).

$^{13}\text{C NMR}$  (100 MHz,  $\text{CDCl}_3$ )  $\delta$  104.4, 90.5, 51.6, 36.6, 27.0, 7.6, 4.5.

**HRMS** (ESI)  $m/z$  calcd. For  $\text{C}_{13}\text{H}_{26}\text{BrSi}$  [ $\text{M} + \text{H}$ ] $^+$  289.0982, found 289.0981.

**(3-Bromo-4,4-dimethylpent-1-yn-1-yl)benzene (E52)**

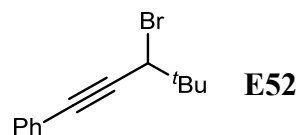

$^1\text{H NMR}$  (400 MHz,  $\text{CDCl}_3$ )  $\delta$  7.50 – 7.44 (m, 2H), 7.37 – 7.32 (m, 3H), 4.65 (s, 1H), 1.24 (s, 9H).

### The structures and synthesis of tertiary $\alpha$ -chloroamides:

The  $\alpha$ -chloro acid chloride in anhydrous  $\text{CH}_2\text{Cl}_2$  (5.0 mL) was added dropwise to a solution of the corresponding amine (10.0 mmol) and triethylamine (4.2 mL, 30.0 mmol) in  $\text{CH}_2\text{Cl}_2$  (30.0 mL) at 0 °C. The reaction was stirred at 0 °C for 15 min and then warmed up to room temperature. After completion (monitored by TLC), the reaction was quenched by the addition of 1.0 M HCl, the organic layer was washed by brine, dried over  $\text{Na}_2\text{SO}_4$ , filtered and concentrated under reduced pressure to afford the crude material, which was purified by flash chromatography to yield the tertiary  $\alpha$ -chloroamide.

*Note:* The substrates **E53–77** were known compounds and synthesized according to reported literature<sup>11,12</sup>

#### 2-Chloro-*N*,2-diphenylbutanamide (**E53**)

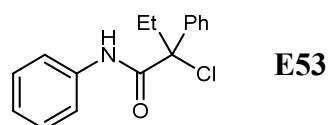

$^1\text{H NMR}$  (400 MHz,  $\text{CDCl}_3$ )  $\delta$  8.42 (s, 1H), 7.64 – 7.57 (m, 2H), 7.57 – 7.48 (m, 2H), 7.42 – 7.27 (m, 5H), 7.18 – 7.10 (m, 1H), 2.66 (dq,  $J = 14.3, 7.1$  Hz, 1H), 2.42 (dq,  $J = 14.4, 7.2$  Hz, 1H), 1.07 (t,  $J = 7.2$  Hz, 3H).

#### *N*-(4-(*Tert*-butyl)phenyl)-2-chloro-2-phenylbutanamide (**E54**)

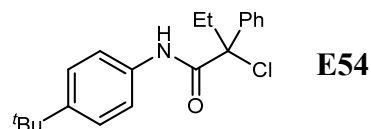

$^1\text{H NMR}$  (400 MHz,  $\text{CDCl}_3$ )  $\delta$  8.39 (s, 1H), 7.66 – 7.55 (m, 2H), 7.49 – 7.44 (m, 2H), 7.39 – 7.29 (m, 5H), 2.67 (dq,  $J = 14.3, 7.1$  Hz, 1H), 2.41 (dq,  $J = 14.4, 7.2$  Hz, 1H), 1.30 (s, 9H), 1.07 (t,  $J = 7.2$  Hz, 3H).

#### *N*-([1,1'-Biphenyl]-4-yl)-2-chloro-2-phenylbutanamide (**E55**)

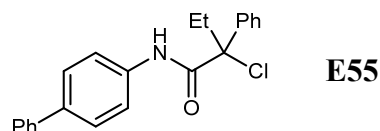

$^1\text{H NMR}$  (400 MHz,  $\text{CDCl}_3$ )  $\delta$  8.47 (s, 1H), 7.66 – 7.59 (m, 4H), 7.59 – 7.54 (m, 4H), 7.45 – 7.31 (m, 6H), 2.68 (dq,  $J = 14.3, 7.1$  Hz, 1H), 2.44 (dq,  $J = 14.5, 7.2$  Hz, 1H), 1.09 (t,  $J = 7.2$  Hz, 3H).

#### *N*-(4-Bromophenyl)-2-chloro-2-phenylbutanamide (**E56**)

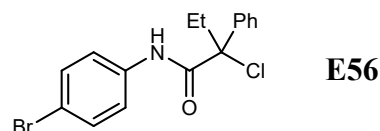

**<sup>1</sup>H NMR** (400 MHz, CDCl<sub>3</sub>) δ 8.37 (s, 1H), 7.63 – 7.54 (m, 2H), 7.44 (s, 4H), 7.41 – 7.30 (m, 3H), 2.64 (dq, *J* = 14.3, 7.1 Hz, 1H), 2.41 (dq, *J* = 14.5, 7.2 Hz, 1H), 1.06 (t, *J* = 7.2 Hz, 3H).

**2-Chloro-*N*-(3-fluorophenyl)-2-phenylbutanamide (E57)**

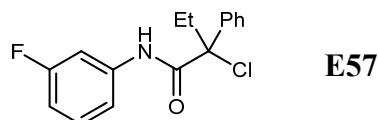

**<sup>1</sup>H NMR** (400 MHz, CDCl<sub>3</sub>) δ 8.42 (s, 1H), 7.61 – 7.57 (m, 2H), 7.53 (dt, *J* = 10.8, 2.2 Hz, 1H), 7.42 – 7.30 (m, 3H), 7.28 – 7.24 (m, 1H), 7.16 – 7.12 (m, 1H), 6.86 – 6.80 (m, 1H), 2.64 (dq, *J* = 14.3, 7.1 Hz, 1H), 2.41 (dq, *J* = 14.4, 7.2 Hz, 1H), 1.06 (t, *J* = 7.2 Hz, 3H).

**2-Chloro-*N*-(3,5-dimethylphenyl)-2-phenylbutanamide (E58)**

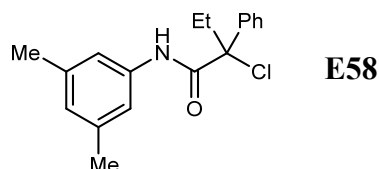

**<sup>1</sup>H NMR** (400 MHz, CDCl<sub>3</sub>) δ 8.35 (s, 1H), 7.64 – 7.55 (m, 2H), 7.43 – 7.28 (m, 3H), 7.19 (s, 2H), 6.83 – 6.75 (m, 1H), 2.66 (dq, *J* = 14.3, 7.1 Hz, 1H), 2.41 (dq, *J* = 14.4, 7.2 Hz, 1H), 2.29 (s, 6H), 1.07 (t, *J* = 7.2 Hz, 3H).

**2-Chloro-*N*-(3,5-dimethoxyphenyl)-2-phenylbutanamide (E59)**

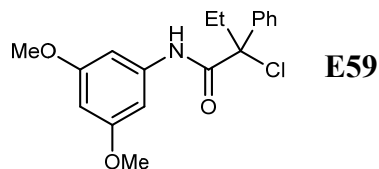

**<sup>1</sup>H NMR** (400 MHz, CDCl<sub>3</sub>) δ 8.36 (s, 1H), 7.64 – 7.55 (m, 2H), 7.40 – 7.30 (m, 3H), 6.78 (d, *J* = 2.3 Hz, 2H), 6.26 (t, *J* = 2.2 Hz, 1H), 3.78 (s, 6H), 2.65 (dq, *J* = 14.3, 7.1 Hz, 1H), 2.41 (dq, *J* = 14.4, 7.2 Hz, 1H), 1.07 (t, *J* = 7.2 Hz, 3H).

**2-Chloro-*N*-(naphthalen-1-yl)-2-phenylbutanamide (E60)**

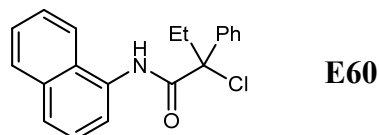

**<sup>1</sup>H NMR** (400 MHz, CDCl<sub>3</sub>) δ 8.90 (s, 1H), 7.99 (d, *J* = 7.5 Hz, 1H), 7.91 – 7.80 (m, 1H), 7.70 (d, *J* = 7.9 Hz, 4H), 7.54 – 7.32 (m, 6H), 2.73 (dq, *J* = 14.3, 7.1 Hz, 1H), 2.49 (dq, *J* = 14.4, 7.2 Hz, 1H), 1.13 (t, *J* = 7.2 Hz, 3H).

**2-Chloro-*N*-(naphthalen-1-yl)-2-phenylpropanamide (E61)**

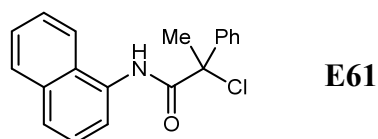

$^1\text{H NMR}$  (400 MHz,  $\text{CDCl}_3$ )  $\delta$  8.53 (s, 1H), 8.34 – 8.17 (m, 1H), 7.83 – 7.74 (m, 3H), 7.69 – 7.60 (m, 2H), 7.49 – 7.31 (m, 6H), 2.25 (s, 3H).

**2-Chloro-*N*-(naphthalen-1-yl)-2-phenylpentanamide (E62)**

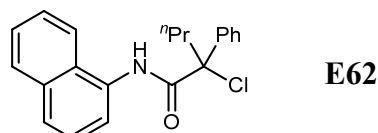

$^1\text{H NMR}$  (400 MHz,  $\text{CDCl}_3$ )  $\delta$  8.91 (s, 1H), 8.00 (d,  $J = 7.5$  Hz, 1H), 7.88 – 7.82 (m, 1H), 7.74 – 7.65 (m, 4H), 7.52 – 7.29 (m, 6H), 2.72 – 2.61 (m, 1H), 2.47 – 2.36 (m, 1H), 1.64 – 1.54 (m, 2H), 0.99 (t,  $J = 7.4$  Hz, 3H).

**2-Chloro-*N*-(naphthalen-1-yl)-2,3-diphenylpropanamide (E63)**

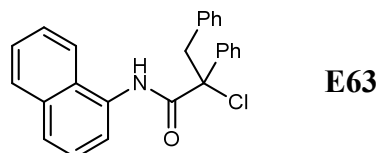

$^1\text{H NMR}$  (400 MHz,  $\text{CDCl}_3$ )  $\delta$  8.68 (s, 1H), 7.89 – 7.78 (m, 2H), 7.75 – 7.65 (m, 3H), 7.52 – 7.34 (m, 7H), 7.29 – 7.15 (m, 5H), 4.08 (d,  $J = 13.9$  Hz, 1H), 3.66 (d,  $J = 13.9$  Hz, 1H).

**2-Chloro-*N*-(naphthalen-1-yl)-2,4-diphenylbutanamide (E64)**

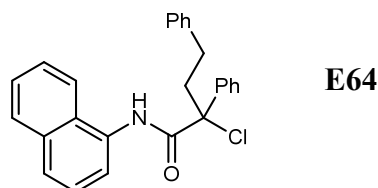

$^1\text{H NMR}$  (400 MHz,  $\text{CDCl}_3$ )  $\delta$  8.90 (s, 1H), 8.03 – 7.95 (m, 1H), 7.88 – 7.82 (m, 1H), 7.76 – 7.67 (m, 4H), 7.54 – 7.45 (m, 3H), 7.45 – 7.38 (m, 2H), 7.38 – 7.32 (m, 1H), 7.30 – 7.20 (m, 4H), 7.20 – 7.13 (m, 1H), 3.07 – 2.95 (m, 1H), 2.93 – 2.84 (m, 2H), 2.77 – 2.65 (m, 1H).

**2-Chloro-3-cyclopropyl-*N*-(naphthalen-1-yl)-2-phenylpropanamide (E65)**

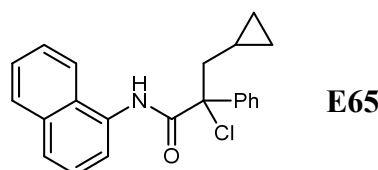

$^1\text{H NMR}$  (400 MHz,  $\text{CDCl}_3$ )  $\delta$  9.05 (s, 1H), 8.02 (d,  $J = 7.5$  Hz, 1H), 7.89 – 7.83 (m,

1H), 7.80 – 7.75 (m, 1H), 7.73 – 7.66 (m, 3H), 7.54 – 7.44 (m, 3H), 7.43 – 7.31 (m, 3H), 2.54 (d,  $J = 6.6$  Hz, 2H), 1.08 – 0.94 (m, 1H), 0.52 – 0.42 (m, 2H), 0.33 – 0.25 (m, 1H), 0.18 – 0.10 (m, 1H).

### 2-Chloro-3-cyclopropyl-*N*-(naphthalen-1-yl)-2-phenylpropanamide (E66)

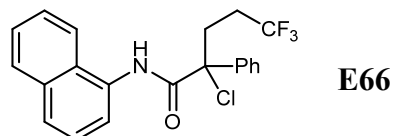

$^1\text{H NMR}$  (400 MHz,  $\text{CDCl}_3$ )  $\delta$  8.55 (s, 1H), 7.92 (d,  $J = 7.5$  Hz, 1H), 7.87 – 7.83 (m, 1H), 7.74 – 7.67 (m, 3H), 7.61 – 7.56 (m, 1H), 7.51 – 7.37 (m, 6H), 2.96 – 2.86 (m, 1H), 2.73 – 2.64 (m, 1H), 2.51 – 2.19 (m, 2H).

### 2-Chloro-*N*-(naphthalen-1-yl)-2-phenylpent-4-enamide (E67)

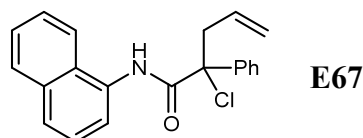

$^1\text{H NMR}$  (400 MHz,  $\text{CDCl}_3$ )  $\delta$  8.83 (s, 1H), 7.99 – 7.93 (m, 1H), 7.90 – 7.83 (m, 1H), 7.74 – 7.67 (m, 4H), 7.53 – 7.46 (m, 3H), 7.46 – 7.40 (m, 2H), 7.39 – 7.34 (m, 1H), 5.97 – 5.82 (m, 1H), 5.31 – 5.14 (m, 2H), 3.50 – 3.41 (m, 1H), 3.26 – 3.16 (m, 1H).

### 2-Chloro-3-methyl-*N*-(naphthalen-1-yl)-2-phenylbutanamide (E68)

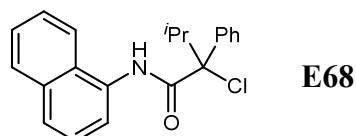

$^1\text{H NMR}$  (400 MHz,  $\text{CDCl}_3$ )  $\delta$  9.04 (s, 1H), 7.91 (d,  $J = 7.5$  Hz, 1H), 7.87 – 7.80 (m, 3H), 7.73 – 7.67 (m, 2H), 7.51 – 7.32 (m, 6H), 3.33 – 3.14 (m, 1H), 1.24 (d,  $J = 6.4$  Hz, 3H), 0.88 (d,  $J = 6.7$  Hz, 3H).

### 2-(4-(*Tert*-butyl)phenyl)-2-chloro-*N*-(naphthalen-1-yl)butanamide (E69)

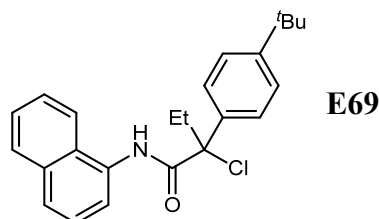

$^1\text{H NMR}$  (400 MHz,  $\text{CDCl}_3$ )  $\delta$  8.92 (s, 1H), 8.03 (d,  $J = 7.5$  Hz, 1H), 7.88 – 7.84 (m, 1H), 7.73 – 7.68 (m, 2H), 7.65 – 7.57 (m, 2H), 7.52 – 7.41 (m, 5H), 2.75 (dq,  $J = 14.3$ , 7.1 Hz, 1H), 2.49 (dq,  $J = 14.4$ , 7.2 Hz, 1H), 1.33 (s, 9H), 1.15 (t,  $J = 7.2$  Hz, 3H).

**2-(4-Bromophenyl)-2-chloro-*N*-(naphthalen-1-yl)butanamide (E70)**

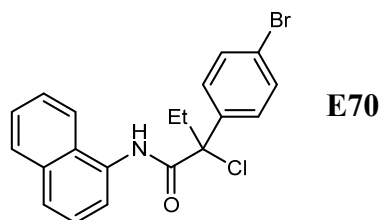

**<sup>1</sup>H NMR** (400 MHz, CDCl<sub>3</sub>) δ 8.97 (s, 1H), 7.97 (d, *J* = 7.5 Hz, 1H), 7.91 – 7.83 (m, 1H), 7.78 – 7.69 (m, 2H), 7.62 – 7.44 (m, 7H), 2.71 (dq, *J* = 14.3, 7.1 Hz, 1H), 2.45 (dq, *J* = 14.4, 7.2 Hz, 1H), 1.14 (t, *J* = 7.2 Hz, 3H).

**2-Chloro-2-(3-fluorophenyl)-*N*-(naphthalen-1-yl)butanamide (E71)**

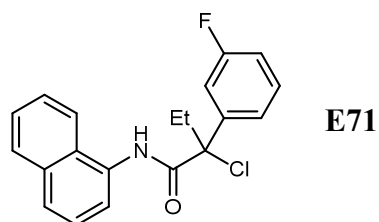

**<sup>1</sup>H NMR** (400 MHz, CDCl<sub>3</sub>) δ 8.95 (s, 1H), 7.98 (d, *J* = 7.5 Hz, 1H), 7.91 – 7.84 (m, 1H), 7.77 – 7.71 (m, 2H), 7.56 – 7.44 (m, 5H), 7.42 – 7.34 (m, 1H), 7.11 – 6.99 (m, 1H), 2.72 (dq, *J* = 14.3, 7.1 Hz, 1H), 2.47 (dq, *J* = 14.4, 7.2 Hz, 1H), 1.14 (t, *J* = 7.2 Hz, 3H).

**2-Chloro-*N*-(naphthalen-1-yl)-2-(*p*-tolyl)propanamide (E72)**

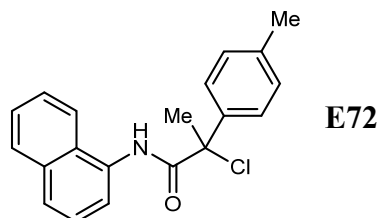

**<sup>1</sup>H NMR** (400 MHz, CDCl<sub>3</sub>) δ 8.83 (s, 1H), 8.02 – 7.94 (m, 1H), 7.83 – 7.77 (m, 1H), 7.72 – 7.62 (m, 2H), 7.60 – 7.51 (m, 2H), 7.48 – 7.40 (m, 3H), 7.19 (d, *J* = 8.1 Hz, 2H), 2.33 (s, 3H), 2.25 (s, 3H).

**2-Chloro-2-(4-isobutylphenyl)-*N*-(naphthalen-1-yl)propanamide (E73)**

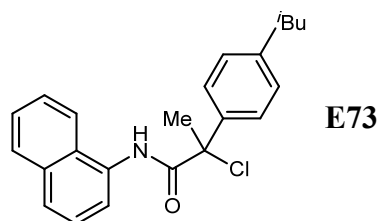

**<sup>1</sup>H NMR** (400 MHz, CDCl<sub>3</sub>) δ 8.79 (s, 1H), 8.02 (d, *J* = 7.5 Hz, 1H), 7.88 – 7.83 (m, 1H), 7.72 – 7.58 (m, 4H), 7.51 – 7.45 (m, 3H), 7.20 (d, *J* = 8.3 Hz, 2H), 2.50 (d, *J* = 7.2 Hz, 2H), 2.29 (s, 3H), 1.94 – 1.83 (m, 1H), 0.92 (d, *J* = 6.6 Hz, 6H).

**2-Chloro-2-(3-methoxyphenyl)-*N*-(naphthalen-1-yl)propanamide (E74)**

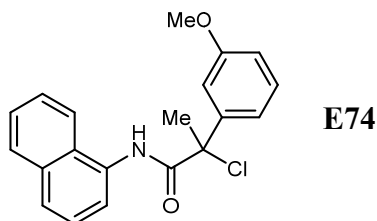

**<sup>1</sup>H NMR** (400 MHz, CDCl<sub>3</sub>) δ 8.76 (s, 1H), 8.00 (d, *J* = 7.6 Hz, 1H), 7.90 – 7.84 (m, 1H), 7.75 – 7.67 (m, 2H), 7.54 – 7.45 (m, 3H), 7.39 – 7.26 (m, 3H), 6.94 – 6.88 (m, 1H), 3.83 (s, 3H), 2.28 (s, 3H).

**2-Chloro-2-(4-chlorophenyl)-*N*-(naphthalen-1-yl)propanamide (E75)**

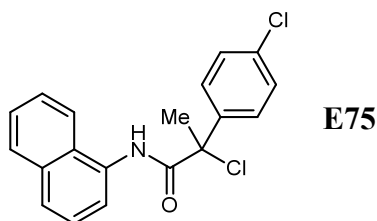

**<sup>1</sup>H NMR** (400 MHz, CDCl<sub>3</sub>) δ 8.94 (s, 1H), 7.99 (d, *J* = 7.5 Hz, 1H), 7.90 – 7.85 (m, 1H), 7.76 – 7.71 (m, 2H), 7.67 – 7.60 (m, 2H), 7.56 – 7.46 (m, 3H), 7.42 – 7.35 (m, 2H), 2.28 (s, 3H).

**2-Chloro-*N*-(naphthalen-1-yl)-2-(3-(trifluoromethyl)phenyl)propanamide (E76)**

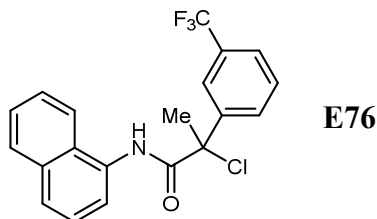

**<sup>1</sup>H NMR** (400 MHz, CDCl<sub>3</sub>) δ 8.95 (s, 1H), 8.00 (s, 1H), 7.94 (d, *J* = 7.5 Hz, 1H), 7.90 – 7.85 (m, 2H), 7.76 – 7.71 (m, 2H), 7.64 (d, *J* = 7.8 Hz, 1H), 7.56 – 7.46 (m, 4H), 2.32 (s, 3H).

**2-Chloro-*N*-(naphthalen-1-yl)-2-(naphthalen-2-yl)propanamide (E77)**

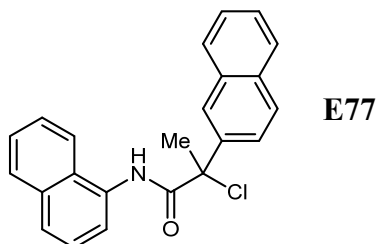

**<sup>1</sup>H NMR** (400 MHz, CDCl<sub>3</sub>) δ 8.89 (s, 1H), 8.19 – 8.13 (m, 1H), 8.03 – 7.97 (m, 1H), 7.92 – 7.80 (m, 4H), 7.77 – 7.67 (m, 3H), 7.55 – 7.42 (m, 5H), 2.38 (s, 3H).



#### 4. Characterization data of ligands

Note: L\*6 and L\*8 were purchased from Daicel Corp. L\*1, L\*2, L\*4, L\*5, L\*9, L\*13–15 were known compounds.

#### 2-(Bis(3,5-di-*tert*-butylphenyl)phosphanyl)-*N*-((*S*)-(6-methoxyquinolin-4-yl)((1*S*,2*S*,4*S*,5*R*)-5-vinylquinuclidin-2-yl)methyl)benzamide (L\*1)

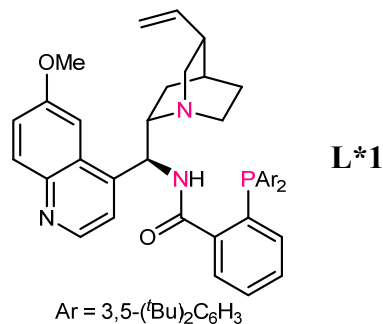

<sup>1</sup>H NMR (400 MHz, CDCl<sub>3</sub>) δ 8.55 (d, *J* = 4.6 Hz, 1H), 7.99 (d, *J* = 9.2 Hz, 1H), 7.74 – 7.65 (m, 2H), 7.59 (s, 1H), 7.41 – 7.32 (m, 4H), 7.31 – 7.27 (m, 1H), 7.15 (s, 1H), 7.10 – 7.04 (m, 2H), 7.00 – 6.93 (m, 2H), 6.90 – 6.83 (m, 1H), 5.72 – 5.59 (m, 1H), 5.40 (s, 1H), 4.99 – 4.84 (m, 2H), 3.98 (s, 3H), 3.12 – 2.98 (m, 2H), 2.83 (s, 1H), 2.55 (s, 1H), 2.49 – 2.37 (m, 1H), 2.20 (s, 1H), 1.63 – 1.46 (m, 3H), 1.39 – 1.30 (m, 1H), 1.23 (s, 18H), 1.19 (s, 18H), 0.97 – 0.87 (m, 1H).

<sup>31</sup>P NMR (162 MHz, CDCl<sub>3</sub>) δ –8.74.

#### 2-(Di-*o*-tolylphosphanyl)-*N*-((*S*)-(6-methoxyquinolin-4-yl)((1*S*,2*S*,4*S*,5*R*)-5-vinylquinuclidin-2-yl)methyl)benzamide (L\*2)

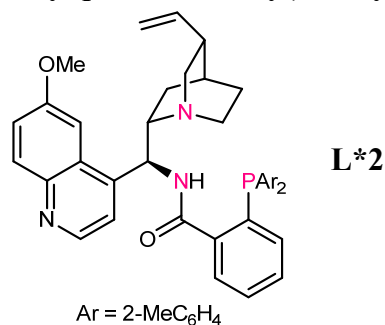

<sup>1</sup>H NMR (400 MHz, CDCl<sub>3</sub>) δ 8.58 (d, *J* = 4.6 Hz, 1H), 7.99 (d, *J* = 9.1 Hz, 1H), 7.73 – 7.63 (m, 2H), 7.42 – 7.32 (m, 2H), 7.30 – 7.24 (m, 2H), 7.23 – 7.17 (m, 2H), 7.17 – 7.09 (m, 3H), 7.08 – 6.98 (m, 2H), 6.88 – 6.81 (m, 1H), 6.74 – 6.68 (m, 1H), 6.68 – 6.63 (m, 1H), 5.77 – 5.63 (m, 1H), 5.49 (s, 1H), 5.01 – 4.96 (m, 1H), 4.95 – 4.92 (m, 1H), 3.95 (s, 3H), 3.24 – 3.03 (m, 2H), 2.89 (s, 1H), 2.67 – 2.45 (m, 2H), 2.27 – 2.22 (m, 1H), 2.17 (d, *J* = 9.5 Hz, 6H), 1.66 – 1.49 (m, 3H), 1.45 – 1.35 (m, 1H), 0.90 – 0.78 (m, 1H).

<sup>31</sup>P NMR (162 MHz, CDCl<sub>3</sub>) δ –26.32.

#### 2-(Bis(3-methoxyphenyl)phosphanyl)-*N*-((*S*)-(6-methoxyquinolin-4-yl)((1*S*,2*S*,4*S*,5*R*)-5-vinylquinuclidin-2-yl)methyl)benzamide (L\*3)

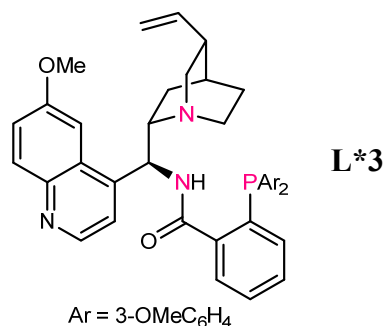

**<sup>1</sup>H NMR** (400 MHz, CDCl<sub>3</sub>) δ 8.66 (d, *J* = 4.6 Hz, 1H), 7.99 (d, *J* = 9.2 Hz, 1H), 7.71 – 7.60 (m, 2H), 7.39 – 7.30 (m, 3H), 7.29 – 7.24 (m, 2H), 7.20 – 7.11 (m, 2H), 6.95 – 6.87 (m, 1H), 6.85 – 6.77 (m, 2H), 6.77 – 6.65 (m, 4H), 5.77 – 5.62 (m, 1H), 5.57 – 5.32 (m, 1H), 5.01 – 4.90 (m, 2H), 3.96 (s, 3H), 3.68 (s, 6H), 3.23 – 3.07 (m, 2H), 3.01 (s, 1H), 2.71 – 2.58 (m, 1H), 2.58 – 2.48 (m, 1H), 2.25 (s, 1H), 1.67 – 1.52 (m, 3H), 1.43 – 1.35 (m, 1H), 0.90 – 0.84 (m, 1H).

**<sup>13</sup>C NMR** (100 MHz, CDCl<sub>3</sub>) δ 169.0, 159.7, 159.6(1), 159.5(8), 159.5(3), 157.9, 147.6, 144.8, 141.3, 138.6, 138.4, 134.4, 131.6, 130.4, 129.7, 129.6, 129.5, 129.0, 128.5, 126.2, 126.0, 121.7, 119.2(4), 119.1(7), 119.0, 118.9, 114.7, 114.4(2), 114.3(5), 102.3, 55.9, 55.8, 55.2(4), 55.2(2), 41.1, 39.5, 27.9, 27.5, 27.0, 26.2.

**<sup>31</sup>P NMR** (162 MHz, CDCl<sub>3</sub>) δ –9.11.

**HRMS** (ESI) *m/z* calcd. for C<sub>41</sub>H<sub>43</sub>N<sub>3</sub>O<sub>4</sub>P [M + H]<sup>+</sup> 672.2986, found: 672.2979.

**2-(Di([1,1'-biphenyl]-4-yl)phosphanyl)-*N*-((*S*)-(6-methoxyquinolin-4-yl))((1*S*,2*S*,4*S*,5*R*)-5-vinylquinuclidin-2-yl)methyl)benzamide (L\*4)**

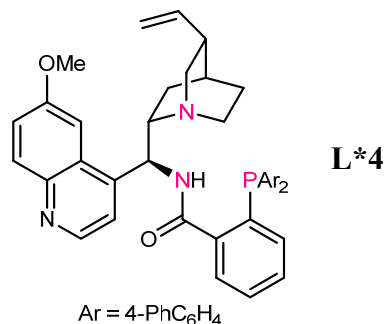

**<sup>1</sup>H NMR** (400 MHz, CDCl<sub>3</sub>) δ 8.63 (d, *J* = 4.5 Hz, 1H), 7.98 (d, *J* = 9.2 Hz, 1H), 7.70 (d, *J* = 2.7 Hz, 1H), 7.69 – 7.64 (m, 1H), 7.61 – 7.55 (m, 4H), 7.55 – 7.48 (m, 4H), 7.47 – 7.39 (m, 5H), 7.38 – 7.36 (m, 1H), 7.36 – 7.28 (m, 4H), 7.28 – 7.25 (m, 2H), 7.25 – 7.18 (m, 3H), 7.07 – 7.00 (m, 1H), 5.78 – 5.62 (m, 1H), 5.46 (s, 1H), 4.99 – 4.93 (m, 1H), 4.93 – 4.89 (m, 1H), 3.96 (s, 3H), 3.23 – 3.07 (m, 2H), 3.02 (s, 1H), 2.68 – 2.50 (m, 2H), 2.28 – 2.18 (m, 1H), 1.66 – 1.59 (m, 1H), 1.59 – 1.48 (m, 2H), 1.47 – 1.35 (m, 1H), 0.94 – 0.84 (m, 1H).

**<sup>31</sup>P NMR** (162 MHz, CDCl<sub>3</sub>) δ –12.32.

**2-(Bis(3,5-diisopropylphenyl)phosphanyl)-N-((S)-(6-methoxyquinolin-4-yl)((1S,2S,4S,5R)-5-vinylquinolidin-2-yl)methyl)benzamide (L\*5)**

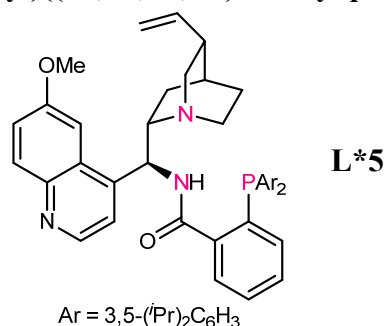

Ar = 3,5-(iPr)<sub>2</sub>C<sub>6</sub>H<sub>3</sub>

**<sup>1</sup>H NMR** (400 MHz, CDCl<sub>3</sub>) δ 8.63 – 8.56 (m, 1H), 8.04 – 7.98 (m, 1H), 7.75 – 7.67 (m, 2H), 7.54 (s, 1H), 7.41 – 7.35 (m, 2H), 7.33 – 7.30 (m, 1H), 7.21 (s, 1H), 7.10 – 7.03 (m, 2H), 6.97 – 6.91 (m, 3H), 6.87 – 6.81 (m, 2H), 5.76 – 5.62 (m, 1H), 5.45 (s, 1H), 5.01 – 4.89 (m, 2H), 4.00 (s, 3H), 3.20 – 3.01 (m, 2H), 2.87 – 2.76 (m, 4H), 2.65 – 2.53 (m, 1H), 2.52 – 2.44 (m, 1H), 2.28 – 2.18 (m, 1H), 1.65 – 1.60 (m, 1H), 1.60 – 1.51 (m, 2H), 1.21 – 1.17 (m, 12H), 1.14 (d, *J* = 6.9 Hz, 12H), 0.98 – 0.89 (m, 1H).

**<sup>31</sup>P NMR** (162 MHz, CDCl<sub>3</sub>) δ –10.06.

**1-((11bS)-2,6-diiododinaaphtho[2,1-d:1',2'-f][1,3,2]dioxaphosphepin-4-yl)piperidine (L\*7)**

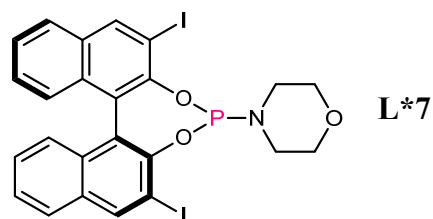

**<sup>1</sup>H NMR** (400 MHz, CDCl<sub>3</sub>) δ 8.50 (d, *J* = 7.8 Hz, 2H), 7.80 (d, *J* = 8.2 Hz, 2H), 7.47 – 7.36 (m, 2H), 7.27 – 7.24 (m, 3H), 7.20 – 7.15 (m, 1H), 3.68 – 3.57 (m, 2H), 3.57 – 3.49 (m, 2H), 3.20 – 3.08 (m, 2H), 3.08 – 2.94 (m, 2H).

**<sup>13</sup>C NMR** (100 MHz, CDCl<sub>3</sub>) δ 148.9, 148.0, 134.0, 139.9, 132.7, 132.6, 132.4, 132.0, 127.4(3), 127.4(2), 126.9, 125.8, 125.7, 124.5(1), 124.4(5), 122.9, 91.5, 91.3, 68.0, 67.9, 44.6, 44.4.

**<sup>31</sup>P NMR** (162 MHz, CDCl<sub>3</sub>) δ 143.74.

**HRMS** (ESI) *m/z* calcd. for C<sub>24</sub>H<sub>19</sub>I<sub>2</sub>NO<sub>3</sub>P [M + H]<sup>+</sup> 653.9186, found: 653.9178.

**(S)-N-(2-(4-benzyl-4,5-dihydrooxazol-2-yl)phenyl)-2-(diphenylphosphanyl)benzamide (L\*9)**

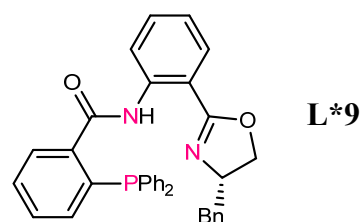

**<sup>1</sup>H NMR** (400 MHz, CDCl<sub>3</sub>) δ 12.68 (s, 1H), 8.79 – 8.72 (m, 1H), 7.83 (dd, *J* = 7.9, 1.6 Hz, 1H), 7.80 – 7.74 (m, 1H), 7.45 – 7.39 (m, 1H), 7.36 – 7.25 (m, 12H), 7.23 – 7.11 (m, 5H), 7.09 – 7.03 (m, 2H), 4.67 – 4.57 (m, 1H), 4.36 (t, *J* = 8.9 Hz, 1H), 4.12 – 4.05 (m, 1H), 3.06 (dd, *J* = 13.8, 6.6 Hz, 1H), 2.79 (dd, *J* = 13.9, 7.4 Hz, 1H).

**<sup>31</sup>P NMR** (162 MHz, CDCl<sub>3</sub>) δ –8.06.

**(*S*)-*N*-(2-(4-(4-chlorobenzyl)-4,5-dihydrooxazol-2-yl)phenyl)-2-(diphenylphosphanyl)benzamide (L\*10)**

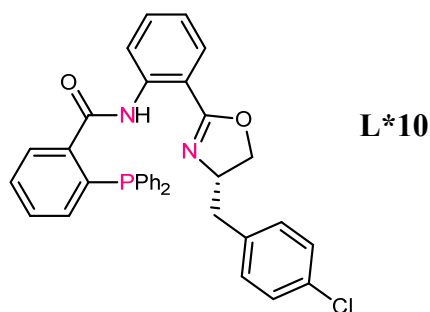

**<sup>1</sup>H NMR** (400 MHz, CDCl<sub>3</sub>) δ 12.58 (s, 1H), 8.75 (dd, *J* = 8.5, 1.1 Hz, 1H), 7.86 – 7.80 (m, 1H), 7.70 – 7.63 (m, 1H), 7.45 – 7.39 (m, 1H), 7.39 – 7.33 (m, 1H), 7.33 – 7.25 (m, 10H), 7.24 – 7.19 (m, 1H), 7.12 – 7.01 (m, 6H), 4.61 – 4.50 (m, 1H), 4.38 (t, *J* = 8.9 Hz, 1H), 4.07 – 3.99 (m, 1H), 2.90 (dd, *J* = 13.9, 7.7 Hz, 1H), 2.79 (dd, *J* = 14.0, 6.3 Hz, 1H).

**<sup>13</sup>C NMR** (100 MHz, CDCl<sub>3</sub>) δ 167.5, 164.3, 141.5, 141.3, 140.2, 138.8, 138.6(2), 138.5(8), 138.4(9), 138.4(6), 138.3, 136.2, 135.0, 134.1, 134.0, 133.9, 133.8, 132.9, 132.5, 130.6, 130.4, 129.2, 128.7, 128.6, 128.5(2), 128.4(8), 128.4(5), 128.4(1), 128.3(8), 127.4, 127.3, 122.5, 120.3, 113.3, 70.8, 67.7, 41.6.

**<sup>31</sup>P NMR** (162 MHz, CDCl<sub>3</sub>) δ –8.25.

**HRMS** (ESI) *m/z* calcd. for C<sub>35</sub>H<sub>29</sub>ClN<sub>2</sub>O<sub>2</sub>P [M + H]<sup>+</sup> 575.1650, found: 575.1646.

**(*S*)-*N*-(2-(4-(4-chlorobenzyl)-1-(*p*-tolyl)-4,5-dihydro-1H-imidazol-2-yl)phenyl)-2-(diphenylphosphanyl)benzamide (L\*11)**

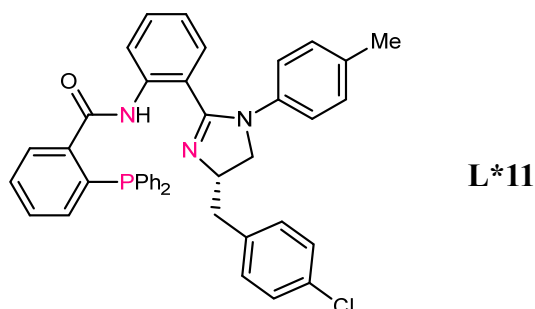

**<sup>1</sup>H NMR** (400 MHz, CDCl<sub>3</sub>) δ 12.26 (s, 1H), 8.51 (d, *J* = 8.4 Hz, 1H), 7.83 – 7.72 (m, 1H), 7.37 – 7.22 (m, 13H), 7.16 (d, 2H), 7.09 – 6.99 (m, 4H), 6.95 (d, *J* = 8.0 Hz, 2H), 6.75 (t, *J* = 7.6 Hz, 1H), 6.61 (d, *J* = 7.9 Hz, 2H), 4.57 – 4.42 (m, 1H), 3.96 (t, *J* = 9.9 Hz, 1H), 3.54 (t, *J* = 8.7 Hz, 1H), 2.98 (dd, *J* = 13.7, 6.4 Hz, 1H), 2.74 (dd, *J* = 13.8, 6.9 Hz, 1H), 2.25 (s, 3H).

$^{13}\text{C}$  NMR (100 MHz,  $\text{CDCl}_3$ )  $\delta$  166.8, 161.7, 141.3, 141.2, 141.1, 139.0, 138.8, 138.6, 138.5(2), 138.4(8), 138.4(0), 136.7, 134.9, 134.3, 134.1(2), 134.0(9), 133.9(2), 133.8(9), 132.4, 131.0, 130.6(5), 130.5(9), 130.1, 129.6, 128.6, 128.5(4), 128.5(1), 128.5, 128.4(4), 128.4(2), 127.4(1), 127.3(7), 123.7, 122.3, 121.5, 117.1, 65.5, 58.3, 42.0, 20.9.  
 $^{31}\text{P}$  NMR (162 MHz,  $\text{CDCl}_3$ )  $\delta$  -8.22.

HRMS (ESI)  $m/z$  calcd. for  $\text{C}_{42}\text{H}_{36}\text{ClN}_3\text{OP}$   $[\text{M} + \text{H}]^+$  664.2279, found: 664.2278.

**(S)-N-(2-(1-(4-(*tert*-butyl)phenyl)-4-(4-chlorobenzyl)-4,5-dihydro-1H-imidazol-2-yl)phenyl)-2-(diphenylphosphanyl)benzamide (L\*12)**

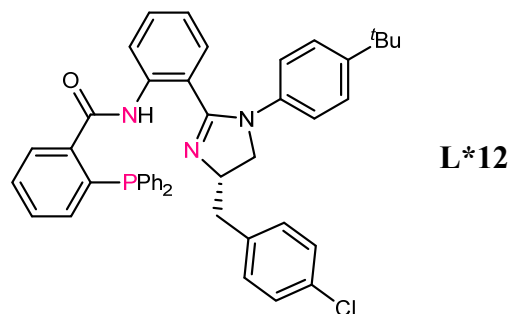

$^1\text{H}$  NMR (400 MHz,  $\text{CDCl}_3$ )  $\delta$  12.26 (s, 1H), 8.52 (d,  $J = 8.4$  Hz, 1H), 7.82 – 7.73 (m, 1H), 7.38 – 7.24 (m, 13H), 7.18 – 7.11 (m, 4H), 7.09 – 7.01 (m, 4H), 6.77 (t,  $J = 7.6$  Hz, 1H), 6.66 – 6.56 (m, 2H), 4.58 – 4.41 (m, 1H), 3.99 (t,  $J = 9.9$  Hz, 1H), 3.61 – 3.50 (m, 1H), 3.03 – 2.91 (m, 1H), 2.74 (dd,  $J = 13.8, 6.8$  Hz, 1H), 1.26 (s, 9H).

$^{13}\text{C}$  NMR (100 MHz,  $\text{CDCl}_3$ )  $\delta$  166.9, 161.6, 147.3, 141.4, 141.1, 141.0, 138.9, 138.8, 138.6, 138.5, 138.4, 136.6, 134.9, 134.1(2), 134.0(9), 133.9(2), 133.8(9), 132.4, 131.0, 130.6(4), 130.5(9), 130.2, 128.6(1), 128.5(5), 128.5(1), 128.4(9), 128.4(4), 128.4(2), 127.4(1), 127.3(8), 125.8, 123.0, 122.4, 121.5, 117.2, 65.5, 58.2, 42.0, 34.4, 31.4.

$^{31}\text{P}$  NMR (162 MHz,  $\text{CDCl}_3$ )  $\delta$  -8.20.

HRMS (ESI)  $m/z$  calcd. for  $\text{C}_{45}\text{H}_{42}\text{ClN}_3\text{OP}$   $[\text{M} + \text{H}]^+$  706.2749, found: 706.2745.

**(S)-N-(2-(4-phenyl-4,5-dihydrooxazol-2-yl)phenyl)picolinamide (L\*13)**

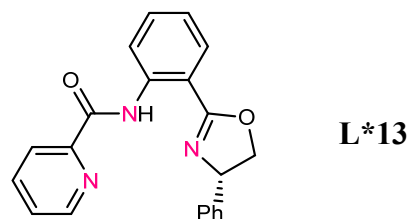

$^1\text{H}$  NMR (400 MHz,  $\text{CDCl}_3$ )  $\delta$  13.86 (s, 1H), 9.11 – 9.03 (m, 1H), 8.29 – 8.22 (m, 2H), 7.97 (dd,  $J = 7.9, 1.6$  Hz, 1H), 7.86 – 7.79 (m, 1H), 7.60 – 7.50 (m, 3H), 7.40 – 7.28 (m, 4H), 7.20 – 7.13 (m, 1H), 5.67 (t,  $J = 9.7$  Hz, 1H), 4.86 (dd,  $J = 10.1, 8.2$  Hz, 1H), 4.35 – 4.18 (m, 1H).

**(1Z,3Z)-1,3-bis(((S)-4-isopropyl-4,5-dihydrooxazol-2-yl)methylene)isoindoline (L\*14)**

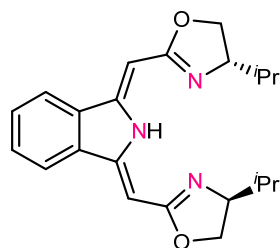

**L\*14**

<sup>1</sup>H NMR (400 MHz, CDCl<sub>3</sub>) δ 11.36 (s, 1H), 7.71 – 7.59 (m, 2H), 7.54 – 7.38 (m, 2H), 5.63 (s, 2H), 4.39 – 4.28 (m, 2H), 4.08 – 3.94 (m, 4H), 1.83 – 1.72 (m, 2H), 1.09 (d, *J* = 6.7 Hz, 6H), 0.96 (d, *J* = 6.7 Hz, 6H).

**(1Z,3Z)-1,3-bis(((S)-4-phenyl-4,5-dihydrooxazol-2-yl)methylene)isoindoline (L\*15)**

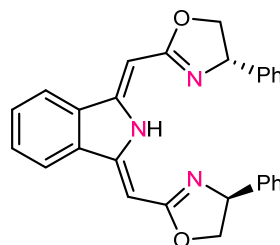

**L\*15**

<sup>1</sup>H NMR (400 MHz, CDCl<sub>3</sub>) δ 11.90 (s, 1H), 7.76 – 7.65 (m, 2H), 7.55 – 7.45 (m, 2H), 7.35 – 7.16 (m, 10H), 5.71 (s, 2H), 5.29 (t, *J* = 9.3 Hz, 2H), 4.64 (t, *J* = 9.1 Hz, 2H), 4.05 (t, *J* = 8.4 Hz, 2H).

**(1Z,3Z)-1,3-bis(((S)-4-(naphthalen-2-ylmethyl)-4,5-dihydrooxazol-2-yl)methylene)isoindoline (L\*16)**

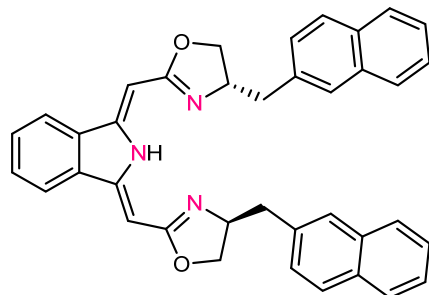

**L\*16**

<sup>1</sup>H NMR (400 MHz, CDCl<sub>3</sub>) δ 11.65 (s, 1H), 7.78 – 7.71 (m, 6H), 7.68 (dd, *J* = 5.7, 3.1 Hz, 2H), 7.66 – 7.64 (m, 2H), 7.48 (dd, *J* = 5.7, 3.1 Hz, 2H), 7.44 – 7.39 (m, 4H), 7.36 (dd, *J* = 8.4, 1.7 Hz, 2H), 5.64 (s, 2H), 4.61 – 4.50 (m, 2H), 4.23 – 4.16 (m, 2H), 3.95 (t, *J* = 7.9 Hz, 2H), 3.29 (dd, *J* = 13.8, 5.4 Hz, 2H), 2.90 (dd, *J* = 13.8, 8.3 Hz, 2H).  
<sup>13</sup>C NMR (100 MHz, CDCl<sub>3</sub>) δ 164.6, 147.7, 135.8, 134.9, 133.7, 132.3, 129.9, 128.2, 127.9, 127.8, 127.7(2), 127.6(7), 126.1, 125.6, 121.1, 83.2, 71.4, 67.4, 42.5.  
HRMS (ESI) *m/z* calcd. for C<sub>38</sub>H<sub>32</sub>N<sub>3</sub>O<sub>2</sub> [M + H]<sup>+</sup> 562.2489, found: 562.2485.

## 5. Enantioconvergent cross-coupling of benzyl electrophiles with sodium arylthiosulfonate

### General procedure A: Substrate scope of (hetero)benzyl halides and sodium arylthiosulfonate (Table 2, 1–38)

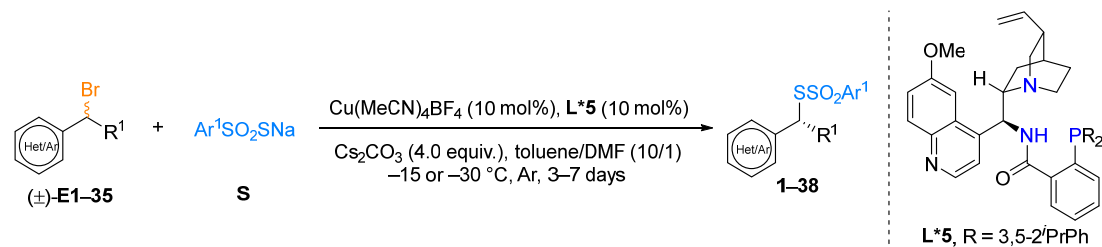

Under argon atmosphere, an oven-dried resealable Schlenk tube equipped with a magnetic stir bar was charged with sodium arylthiosulfonate (0.24 mmol, 1.2 equiv.),  $\text{Cu}(\text{MeCN})_4\text{BF}_4$  (6.28 mg, 0.02 mmol, 10 mol%),  $\text{L}^*\mathbf{5}$  (15.6 mg, 0.02 mmol, 10 mol%) and  $\text{Cs}_2\text{CO}_3$  (260 mg, 0.80 mmol, 4.0 equiv.). Then, (hetero)benzyl halide (0.20 mmol, 1.0 equiv.) and toluene/DMF (v/v = 10/1, 2.2 mL) were sequentially added into the mixture and the reaction mixture was stirred at  $-15$  or  $-30$  °C. Upon completion (monitored by TLC), the precipitate was filtered off and washed by  $\text{CH}_2\text{Cl}_2$ . The filtrate was evaporated and the residue was purified by column chromatography on silica gel to afford the desired product.

The preparation of racemic products  $(\pm)\text{-1-38}$ :

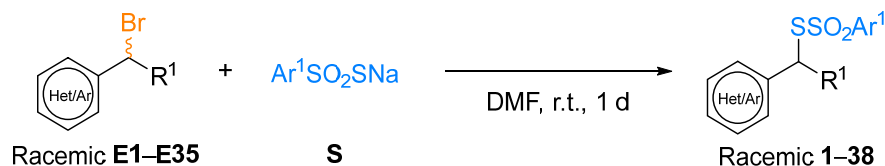

The mixture of sodium arylthiosulfonate (0.12 mmol, 1.2 eq.) and (hetero)benzyl halide (0.10 mmol, 1.0 eq.) in DMF (0.5 mL) was stirring for 1 day. Brine was added to the above reaction solution to quench the reaction. Then, the mixture was extracted with EtOAc (3x) and the combined organic layers were dried over  $\text{Na}_2\text{SO}_4$ , filtered and concentrated. The residue was purified by silica gel column chromatography to afford the desired racemates.

#### (*R*)-*S*-(1-Phenylpropyl) 3,5-dimethylbenzenesulfonothioate (**1**)

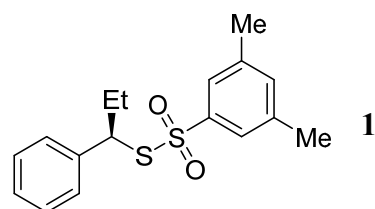

According to **General procedure A**, (1-bromopropyl)benzene **E1** (28.0  $\mu\text{L}$ , 0.2 mmol, 1.0 eq.) with sodium 3,5-dimethylbenzenesulfonothioate **S5** (54.0 mg, 0.24 mmol, 1.2 eq.) run at  $-15$  °C for 3 days. The reaction mixture was purified by column

chromatography on silica gel (petroleum ether/EtOAc = 60/1 ~ 20/1) to yield the product **1** as a white solid (47.4 mg, 74% yield, 92% e.e.).

**HPLC** analysis: Chiralcel IC (*n*-Hexane/*i*-PrOH = 90/10, flow rate 0.8 mL/min,  $\lambda$  = 214 nm),  $t_R$  (minor) = 17.53 min,  $t_R$  (major) = 19.78 min.

**$^1\text{H}$  NMR** (400 MHz,  $\text{CDCl}_3$ )  $\delta$  7.19 – 7.13 (m, 5H), 7.13 – 7.08 (m, 2H), 7.05 (s, 1H), 4.41 (dd,  $J$  = 8.9, 6.5 Hz, 1H), 2.24 (s, 6H), 2.07 – 1.95 (m, 1H), 1.95 – 1.82 (m, 1H), 0.88 (t,  $J$  = 7.3 Hz, 3H).

**$^{13}\text{C}$  NMR** (100 MHz,  $\text{CDCl}_3$ )  $\delta$  145.2, 139.5, 138.9, 134.8, 128.4, 127.9, 127.7, 124.3, 57.7, 29.9, 21.2, 12.0.

**HRMS** (ESI)  $m/z$  calcd. for  $\text{C}_{17}\text{H}_{20}\text{NaO}_2\text{S}_2$  [ $\text{M} + \text{Na}$ ] $^+$  343.0797, found: 343.0794.

### **(*R*)-*S*-(1-Phenylpropyl) benzenesulfonothioate (**2**)**

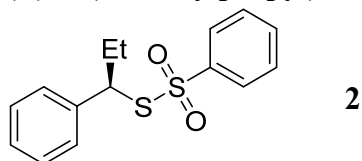

According to **General procedure A**, (1-bromopropyl)benzene **E1** (28  $\mu\text{L}$ , 0.2 mmol, 1.0 eq.) with sodium benzenesulfonothioate **S6** (47.1 mg, 0.24 mmol, 1.2 eq.) run at  $-30$   $^\circ\text{C}$  for 5 days. The reaction mixture was purified by column chromatography on silica gel (petroleum ether/EtOAc = 60/1 ~ 20/1) to yield the product **2** as a white solid (45.8 mg, 78% yield, 90% e.e.).

**HPLC** analysis: Chiralcel IC (*n*-Hexane/*i*-PrOH = 90/10, flow rate 0.8 mL/min,  $\lambda$  = 214 nm),  $t_R$  (minor) = 23.27 min,  $t_R$  (major) = 28.24 min.

**$^1\text{H}$  NMR** (400 MHz,  $\text{CDCl}_3$ )  $\delta$  7.61 – 7.55 (m, 2H), 7.48 – 7.42 (m, 1H), 7.34 – 7.27 (m, 2H), 7.16 – 7.11 (m, 3H), 7.10 – 7.04 (m, 2H), 4.39 (dd,  $J$  = 8.9, 6.5 Hz, 1H), 2.07 – 1.95 (m, 1H), 1.95 – 1.82 (m, 1H), 0.86 (t,  $J$  = 7.3 Hz, 3H).

**$^{13}\text{C}$  NMR** (100 MHz,  $\text{CDCl}_3$ )  $\delta$  145.3, 139.1, 133.1, 128.9, 128.6, 127.8 (two carbon overlapped), 126.7, 57.8, 29.8, 12.0.

**HRMS** (ESI)  $m/z$  calcd. for  $\text{C}_{15}\text{H}_{16}\text{NaO}_2\text{S}_2$  [ $\text{M} + \text{Na}$ ] $^+$  315.0484, found 315.0483.

### **(*R*)-*S*-(1-Phenylpropyl) 4-methylbenzenesulfonothioate (**3**)**

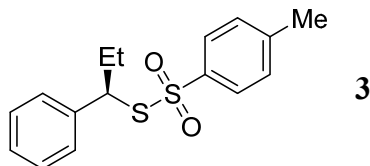

According to **General procedure A**, (1-bromopropyl)benzene **E1** (28  $\mu\text{L}$ , 0.2 mmol, 1.0 eq.) with sodium 4-methylbenzenesulfonothioate **S7** (50.5 mg, 0.24 mmol, 1.2 eq.) run at  $-30$   $^\circ\text{C}$  for 5 days. The reaction mixture was purified by column chromatography on silica gel (petroleum ether/EtOAc = 60/1 ~ 20/1) to yield the product **3** as a white solid (55.2 mg, 90% yield, 90% e.e.).

**HPLC** analysis: Chiralcel IC (*n*-Hexane/*i*-PrOH = 90/10, flow rate 0.8 mL/min,  $\lambda$  = 214 nm),  $t_R$  (minor) = 30.41 min,  $t_R$  (major) = 35.59 min.



<sup>1</sup>H NMR (400 MHz, CDCl<sub>3</sub>) δ 7.52 – 7.46 (m, 2H), 7.17 – 7.13 (m, 3H), 7.13 – 7.10 (m, 1H), 7.10 – 7.05 (m, 3H), 4.36 (dd, *J* = 9.0, 6.4 Hz, 1H), 2.36 (s, 3H), 2.07 – 1.95 (m, 1H), 1.95 – 1.83 (m, 1H), 0.86 (t, *J* = 7.3 Hz, 3H).

<sup>13</sup>C NMR (100 MHz, CDCl<sub>3</sub>) δ 144.1, 142.5, 139.3, 129.5, 128.6, 127.8, 127.6, 126.8, 57.6, 29.8, 21.6, 12.0.

HRMS (ESI) *m/z* calcd. for C<sub>16</sub>H<sub>18</sub>NaO<sub>2</sub>S<sub>2</sub> [*M* + Na]<sup>+</sup> 329.0640, found 329.0640.

#### (*R*)-*S*-(1-Phenylpropyl) 3-methylbenzenesulfonylthioate (**4**)

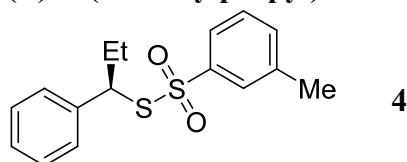

According to **General procedure A**, (1-bromopropyl)benzene **E1** (28 μL, 0.2 mmol, 1.0 eq.) with sodium 3-methylbenzenesulfonylthioate **S8** (50.5 mg, 0.24 mmol, 1.2 eq.) run at –15 °C for 3 days. The reaction mixture was purified by column chromatography on silica gel (petroleum ether/EtOAc = 60/1 ~ 20/1) to yield the product **4** as a white solid (55.9 mg, 91% yield, 90% e.e.).

**HPLC** analysis: Chiralcel IC (*n*-Hexane/*i*-PrOH = 90/10, flow rate 0.8 mL/min, λ = 214 nm), *t<sub>R</sub>* (minor) = 22.73 min, *t<sub>R</sub>* (major) = 27.13 min.

<sup>1</sup>H NMR (400 MHz, CDCl<sub>3</sub>) δ 7.25 – 7.20 (m, 2H), 7.17 – 7.12 (m, 3H), 7.11 – 7.05 (m, 3H), 7.01 – 6.94 (m, 1H), 4.39 (dd, *J* = 8.9, 6.5 Hz, 1H), 3.75 (s, 3H), 2.07 – 1.96 (m, 1H), 1.96 – 1.83 (m, 1H), 0.87 (t, *J* = 7.3 Hz, 3H).

<sup>13</sup>C NMR (100 MHz, CDCl<sub>3</sub>) δ 159.5, 146.3, 139.2, 129.9, 128.5, 127.7 (two carbon overlapped), 119.8, 119.0, 111.1, 57.8, 55.7, 29.9, 12.0.

HRMS (ESI) *m/z* calcd. for C<sub>16</sub>H<sub>18</sub>NaO<sub>2</sub>S<sub>2</sub> [*M* + Na]<sup>+</sup> 329.0640, found 329.0641.

#### (*R*)-*S*-(1-Phenylethyl) 3,5-dimethylbenzenesulfonylthioate (**5**)

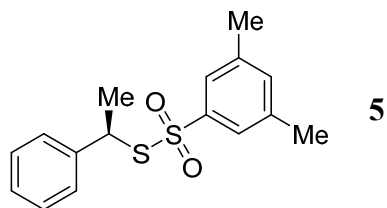

According to **General procedure B**, (1-bromoethyl)benzene **E2** (24 μL, 0.2 mmol, 1.0 eq.) with **S5** (53.8 mg, 0.24 mmol, 1.2 eq.) run at –30 °C for 5 days. The reaction mixture was purified by column chromatography on silica gel (petroleum ether/EtOAc = 60/1 ~ 20/1) to yield the product **5** as a colorless oil (54.8 mg, 89% yield, 91% e.e.).

**HPLC** analysis: Chiralcel IC (*n*-hexane/*i*-PrOH = 90/10, flow rate 0.6 mL/min, λ = 214 nm), *t<sub>R</sub>* (minor) = 29.35 min, *t<sub>R</sub>* (major) = 33.72 min.

<sup>1</sup>H NMR (400 MHz, CDCl<sub>3</sub>) δ 7.25 (s, 2H), 7.21 – 7.13 (m, 5H), 7.10 (s, 1H), 4.65 (q, *J* = 7.2 Hz, 1H), 2.27 (s, 6H), 1.66 (d, *J* = 7.2 Hz, 3H).

<sup>13</sup>C NMR (100 MHz, CDCl<sub>3</sub>) δ 145.0, 140.6, 139.0, 135.0, 128.6, 127.9, 127.3, 124.3, 50.9, 22.8, 21.2.

HRMS (ESI) *m/z* calcd. for C<sub>16</sub>H<sub>18</sub>NaO<sub>2</sub>S<sub>2</sub> [*M* + Na]<sup>+</sup> 329.0640, found 329.0639.

**(R)-S-(1-Phenylbutyl) 3,5-dimethylbenzenesulfonylthioate (6)**

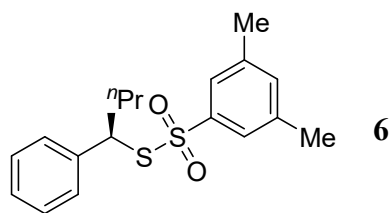

According to the **general procedure A** with (1-bromobutyl)benzene **E3** (30  $\mu$ L, 0.20 mmol, 1.0 eq.) and **S5** (53.8 mg, 0.24 mmol, 1.2 eq.) run at  $-15$   $^{\circ}$ C for 4 days, the reaction mixture was purified by column chromatography on silica gel (petroleum ether/EtOAc = 60/1 ~ 20/1) to yield the product **6** as a white solid (49.9 mg, 75% yield, 91% e.e.).

**HPLC** analysis: Chiralcel IC (*n*-hexane/*i*-PrOH = 95/5, flow rate 1.0 mL/min,  $\lambda$  = 214 nm),  $t_R$  (minor) = 22.64 min,  $t_R$  (major) = 24.14 min.

**$^1$ H NMR** (400 MHz, CDCl<sub>3</sub>)  $\delta$  7.18 – 7.12 (m, 5H), 7.12 – 7.08 (m, 2H), 7.04 (s, 1H), 4.49 (dd,  $J$  = 9.0, 6.5 Hz, 1H), 2.23 (s, 6H), 1.97 – 1.77 (m, 2H), 1.36 – 1.18 (m, 2H), 0.86 (t,  $J$  = 7.3 Hz, 3H).

**$^{13}$ C NMR** (100 MHz, CDCl<sub>3</sub>)  $\delta$  145.2, 139.7, 138.8, 134.8, 128.4, 127.8, 127.7, 124.3, 55.8, 38.5, 21.2, 20.5, 13.6.

**HRMS** (ESI)  $m/z$  calcd. for C<sub>18</sub>H<sub>23</sub>O<sub>2</sub>S<sub>2</sub> [M + H]<sup>+</sup> 335.1134, found 335.1127.

**(R)-S-(2-Methyl-1-phenylpropyl) 3,5-dimethylbenzenesulfonylthioate (7)**

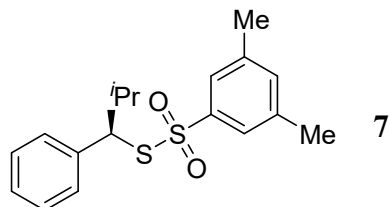

According to the **general procedure A** with (1-bromo-2-methylpropyl)benzene **E4** (31.6  $\mu$ L, 0.20 mmol, 1.0 eq.) and sodium 3,5-dimethylbenzenesulfonylthioate **S5** (53.8 mg, 0.24 mmol, 1.2 eq.) run at  $-15$   $^{\circ}$ C for 7 days, the reaction mixture was purified by column chromatography on silica gel (petroleum ether/EtOAc = 60/1~20/1) to yield the product **7** as a light yellow solid (38.6 mg, 58% yield, 93% e.e.).

**HPLC** analysis: Chiralcel IC (*n*-hexane/*i*-PrOH = 90/10, flow rate 0.8 mL/min,  $\lambda$  = 214 nm),  $t_R$  (minor) = 16.30 min,  $t_R$  (major) = 19.38 min.

**$^1$ H NMR** (400 MHz, CDCl<sub>3</sub>)  $\delta$  7.13 – 7.08 (m, 3H), 7.08 – 7.03 (m, 4H), 6.98 (s, 1H), 4.36 (d,  $J$  = 7.3 Hz, 1H), 2.19 (s, 6H), 2.17 – 2.07 (m, 1H), 1.01 (d,  $J$  = 6.7 Hz, 3H), 0.85 (d,  $J$  = 6.7 Hz, 3H).

**$^{13}$ C NMR** (100 MHz, CDCl<sub>3</sub>)  $\delta$  145.1, 138.9, 138.7, 134.6, 128.5, 127.9, 127.4, 124.3, 63.5, 34.4, 21.1, 20.8, 20.6.

**HRMS** (ESI)  $m/z$  calcd. for C<sub>18</sub>H<sub>22</sub>NaO<sub>2</sub>S<sub>2</sub> [M + Na]<sup>+</sup> 357.0953, found: 357.0952.

**(R)-S-(3-Methyl-1-phenylbutyl) 3,5-dimethylbenzenesulfonylthioate (8)**

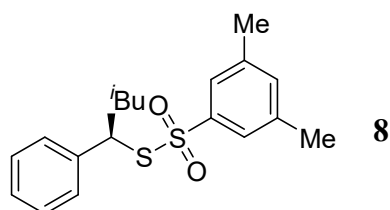

According to the **general procedure A** with (1-bromo-3-methylbutyl)benzene **E5** (35.1  $\mu$ L, 0.20 mmol, 1.0 eq.) and sodium 3,5-dimethylbenzenesulfonylthioate **S5** (53.8 mg, 0.24 mmol, 1.2 eq.) run at  $-15\text{ }^{\circ}\text{C}$  for 4 days, the reaction mixture was purified by column chromatography on silica gel (petroleum ether/EtOAc = 60/1~20/1) to yield the product **8** as a yellow oil (54.2 mg, 78% yield, 90% e.e.).

**HPLC** analysis: Chiralcel OD-H (*n*-hexane/*i*-PrOH = 99/1, flow rate 0.6 mL/min,  $\lambda$  = 214 nm),  $t_R$  (minor) = 12.47 min,  $t_R$  (major) = 13.71 min.

**$^1\text{H}$  NMR** (400 MHz,  $\text{CDCl}_3$ )  $\delta$  7.19 – 7.14 (m, 5H), 7.14 – 7.10 (m, 2H), 7.06 (s, 1H), 4.56 (t,  $J$  = 8.1 Hz, 1H), 2.25 (s, 6H), 1.80 – 1.73 (m, 2H), 1.52 – 1.42 (m, 1H), 0.90 (d,  $J$  = 6.6 Hz, 3H), 0.86 (d,  $J$  = 6.6 Hz, 3H).

**$^{13}\text{C}$  NMR** (100 MHz,  $\text{CDCl}_3$ )  $\delta$  145.1, 139.7, 138.8, 134.8, 128.4, 127.8, 127.7, 124.3, 54.3, 45.2, 25.7, 22.7, 21.7, 21.2.

**HRMS** (ESI)  $m/z$  calcd. for  $\text{C}_{19}\text{H}_{25}\text{O}_2\text{S}_2$  [ $\text{M} + \text{H}$ ] $^+$  349.1290, found: 349.1285.

**(R)-S-(Cyclopentyl(phenyl)methyl) 3,5-dimethylbenzenesulfonylthioate (9)**

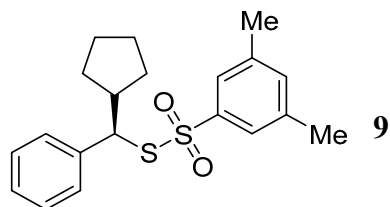

According to the **general procedure A** with (bromo(cyclopentyl)methyl)benzene **E6** (45.6  $\mu$ L, 0.20 mmol, 1.0 eq.) and sodium 3,5-dimethylbenzenesulfonylthioate **S5** (53.8 mg, 0.24 mmol, 1.2 eq.) run at  $-15\text{ }^{\circ}\text{C}$  for 7 days, the reaction mixture was purified by column chromatography on silica gel (petroleum ether/EtOAc = 60/1~20/1) to yield the product **9** as a yellow solid (38.2 mg, 53% yield, 89% e.e.).

**HPLC** analysis: Chiralcel IC (*n*-hexane/*i*-PrOH = 90/10, flow rate 1.0 mL/min,  $\lambda$  = 214 nm),  $t_R$  (minor) = 15.07 min,  $t_R$  (major) = 19.08 min.

**$^1\text{H}$  NMR** (400 MHz,  $\text{CDCl}_3$ )  $\delta$  7.11 – 7.06 (m, 5H), 7.03 (s, 2H), 6.98 (s, 1H), 4.36 (d,  $J$  = 10.0 Hz, 1H), 2.28 – 2.21 (m, 1H), 2.19 (s, 6H), 1.97 – 1.88 (m, 1H), 1.71 – 1.53 (m, 3H), 1.49 – 1.33 (m, 3H), 1.22 – 1.10 (m, 1H).

**$^{13}\text{C}$  NMR** (100 MHz,  $\text{CDCl}_3$ )  $\delta$  145.3, 140.2, 138.6, 134.5, 128.1, 128.0, 127.3, 124.2, 62.0, 45.9, 31.6(4), 31.6(1), 25.3, 25.1, 21.1.

**HRMS** (ESI)  $m/z$  calcd. for  $\text{C}_{20}\text{H}_{25}\text{O}_2\text{S}_2$  [ $\text{M} + \text{H}$ ] $^+$  361.1290, found: 361.1286.

**(R)-S-(1,4-Diphenylbutyl) 3,5-dimethylbenzenesulfonothioate (10)**

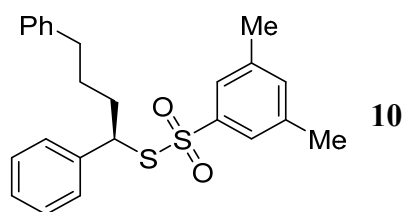

According to the **general procedure A** with (1-bromobutane-1,4-diyl)dibenzene **E7** (44.0  $\mu$ L, 0.20 mmol, 1.0 eq.) and sodium 3,5-dimethylbenzenesulfonothioate **S5** (53.8 mg, 0.24 mmol, 1.2 eq.) run at  $-15\text{ }^{\circ}\text{C}$  for 5 days, the reaction mixture was purified by column chromatography on silica gel (petroleum ether/EtOAc = 60/1~10/1) to yield the product **10** as a colorless oil (57.2 mg, 70% yield, 86% e.e.).

**HPLC** analysis: Chiralcel IC (*n*-hexane/*i*-PrOH = 90/10, flow rate 0.8 mL/min,  $\lambda = 230$  nm),  $t_R$  (minor) = 23.29 min,  $t_R$  (major) = 28.60 min.

**$^1\text{H}$  NMR** (400 MHz,  $\text{CDCl}_3$ )  $\delta$  7.26 – 7.20 (m, 2H), 7.18 – 7.11 (m, 6H), 7.10 – 7.04 (m, 4H), 7.04 – 7.01 (m, 1H), 4.49 (dd,  $J = 8.9, 6.7$  Hz, 1H), 2.62 – 2.48 (m, 2H), 2.22 (s, 6H), 2.04 – 1.93 (m, 1H), 1.92 – 1.82 (m, 1H), 1.69 – 1.57 (m, 1H), 1.56 – 1.44 (m, 1H).

**$^{13}\text{C}$  NMR** (100 MHz,  $\text{CDCl}_3$ )  $\delta$  145.1, 141.5, 139.6, 138.9, 134.8, 128.4(4), 128.4(3), 128.4(0), 127.8 (two carbon overlapped), 126.0, 124.3, 55.9, 35.9, 35.2, 29.0, 21.2.

**HRMS** (ESI)  $m/z$  calcd. for  $\text{C}_{24}\text{H}_{26}\text{NaO}_2\text{S}_2$  [ $\text{M} + \text{Na}$ ] $^+$  433.1266, found: 433.1256.

**(R)-S-(3-(5-Methylfuran-2-yl)-1-phenylpropyl) 3,5-dimethylbenzenesulfonothioate (11)**

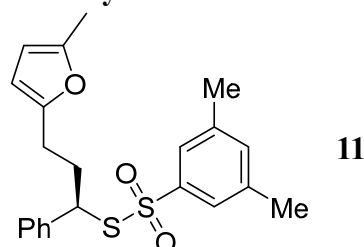

According to the **general procedure A** with 2-(3-bromo-3-phenylpropyl)-5-methylfuran **E8** (56.0  $\mu$ L, 0.20 mmol, 1.0 eq.) and sodium 3,5-dimethylbenzenesulfonothioate **S5** (53.8 mg, 0.24 mmol, 1.2 eq.) run at  $-15\text{ }^{\circ}\text{C}$  for 3.5 days, the reaction mixture was purified by column chromatography on silica gel (petroleum ether/EtOAc = 60/1~5/1) to yield the product **11** as a brown oil (63.0 mg, 79% yield, 85% e.e.).

**HPLC** analysis: Chiralcel IC (*n*-hexane/*i*-PrOH = 90/10, flow rate 1.0 mL/min,  $\lambda = 214$  nm),  $t_R$  (minor) = 15.12 min,  $t_R$  (major) = 19.39 min.

**$^1\text{H}$  NMR** (400 MHz,  $\text{CDCl}_3$ )  $\delta$  7.20 – 7.14 (m, 5H), 7.13 – 7.08 (m, 2H), 7.07 – 7.04 (m, 1H), 5.85 – 5.79 (m, 2H), 4.49 (dd,  $J = 9.3, 6.3$  Hz, 1H), 2.51 (t,  $J = 7.4$  Hz, 2H), 2.36 – 2.26 (m, 1H), 2.24 (s, 6H), 2.23 (s, 3H), 2.21 – 2.11 (m, 1H).

**$^{13}\text{C}$  NMR** (100 MHz,  $\text{CDCl}_3$ )  $\delta$  152.1, 150.8, 145.1, 139.1, 138.9, 134.9, 128.5, 127.9(1), 127.8(8), 124.3, 106.4, 106.0, 55.1, 34.8, 25.8, 21.2, 13.6.

**HRMS** (ESI)  $m/z$  calcd. for  $\text{C}_{22}\text{H}_{24}\text{NaO}_3\text{S}_2$  [ $\text{M} + \text{Na}$ ] $^+$  423.1059, found: 423.1057.

**(R)-S-(4-Methoxy-1-phenylbutyl) 3,5-dimethylbenzenesulfonylthioate (12)**

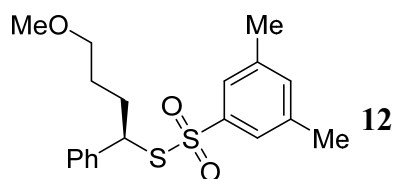

According to the **general procedure A** with (1-bromo-4-methoxybutyl)benzene **E9** (42.6  $\mu\text{L}$ , 0.20 mmol, 1.0 eq.) and sodium 3,5-dimethylbenzenesulfonylthioate **S5** (53.83 mg, 0.24 mmol, 1.2 eq.) run at  $-15\text{ }^{\circ}\text{C}$  for 5 days, the reaction mixture was purified by column chromatography on silica gel (petroleum ether/EtOAc = 30/1~5/1) to yield the product **12** as a white solid (65.6 mg, 90% yield, 87% e.e.).

**HPLC** analysis: Chiralcel IC (*n*-hexane/*i*-PrOH = 75/25, flow rate 0.8 mL/min,  $\lambda = 214$  nm),  $t_{\text{R}}$  (minor) = 18.97 min,  $t_{\text{R}}$  (major) = 21.93 min.

**$^1\text{H}$  NMR** (400 MHz,  $\text{CDCl}_3$ )  $\delta$  7.16 (s, 2H), 7.16 – 7.12 (m, 3H), 7.12 – 7.08 (m, 2H), 7.05 (s, 1H), 4.50 (dd,  $J = 9.0, 6.7$  Hz, 1H), 3.30 (t,  $J = 6.2$  Hz, 2H), 3.26 (s, 3H), 2.24 (s, 6H), 2.10 – 1.99 (m, 1H), 1.99 – 1.89 (m, 1H), 1.65 – 1.52 (m, 1H), 1.52 – 1.39 (m, 1H).

**$^{13}\text{C}$  NMR** (100 MHz,  $\text{CDCl}_3$ )  $\delta$  145.1, 139.5, 138.9, 134.8, 128.4, 127.8, 127.7, 124.3, 71.8, 58.6, 55.9, 33.3, 27.4, 21.2.

**HRMS** (ESI)  $m/z$  calcd. for  $\text{C}_{19}\text{H}_{24}\text{NaO}_3\text{S}_2$  [ $\text{M} + \text{Na}$ ] $^+$  387.1059, found: 387.1058.

**Ethyl (R)-5-(((3,5-dimethylphenyl)sulfonyl)thio)-5-phenylpentanoate (13)**

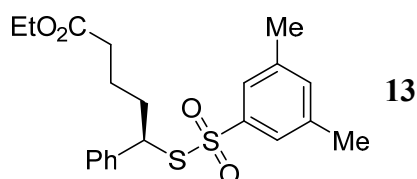

According to the **general procedure A** with ethyl 5-bromo-5-phenylpentanoate **E10** (59.8  $\mu\text{L}$ , 0.20 mmol, 1.0 eq.) and sodium 3,5-dimethylbenzenesulfonylthioate **S5** (53.8 mg, 0.24 mmol, 1.2 eq.) run at  $-15\text{ }^{\circ}\text{C}$  for 5.5 days, the reaction mixture was purified by column chromatography on silica gel (petroleum ether/EtOAc = 60/1~10/1) to yield the product **13** as a yellow oil (60.4 mg, 74% yield, 84% e.e.).

**HPLC** analysis: Chiralcel IC (*n*-hexane/*i*-PrOH = 60/40, flow rate 1.0 mL/min,  $\lambda = 230$  nm),  $t_{\text{R}}$  (minor) = 21.36 min,  $t_{\text{R}}$  (major) = 27.72 min.

**$^1\text{H}$  NMR** (400 MHz,  $\text{CDCl}_3$ )  $\delta$  7.19 – 7.13 (m, 5H), 7.13 – 7.09 (m, 2H), 7.06 (s, 1H), 4.47 (dd,  $J = 9.0, 6.5$  Hz, 1H), 4.09 (q,  $J = 7.1$  Hz, 2H), 2.28 – 2.22 (m, 8H), 2.06 – 1.97 (m, 1H), 1.96 – 1.86 (m, 1H), 1.68 – 1.60 (m, 1H), 1.59 – 1.46 (m, 1H), 1.23 (t,  $J = 7.1$  Hz, 3H).

**$^{13}\text{C}$  NMR** (100 MHz,  $\text{CDCl}_3$ )  $\delta$  173.0, 145.0, 139.2, 139.0, 134.9, 128.5, 127.9, 127.8, 124.3, 60.5, 55.7, 35.8, 33.6, 22.7, 21.2, 14.3.

**HRMS** (ESI)  $m/z$  calcd. for  $\text{C}_{21}\text{H}_{27}\text{O}_4\text{S}_2$  [ $\text{M} + \text{H}$ ] $^+$  407.1345, found: 407.1334.

**(R)-S-(4-Cyano-1-phenylbutyl) 3,5-dimethylbenzenesulfonothioate (14)**

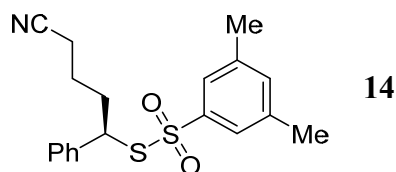

According to the **general procedure A** with 5-bromo-5-phenylpentanenitrile **E11** (35.2  $\mu$ L, 0.20 mmol, 1.0 eq.) and sodium 3,5-dimethylbenzenesulfonothioate **S5** (53.8 mg, 0.24 mmol, 1.2 eq.) run at  $-15\text{ }^{\circ}\text{C}$  for 5 days, the reaction mixture was purified by column chromatography on silica gel (petroleum ether/EtOAc = 60/1~5/1) to yield the product **14** as a colorless oil (55.9 mg, 78% yield, 86% e.e.).

**HPLC** analysis: Chiralcel IC (*n*-hexane/*i*-PrOH = 50/50, flow rate 1.5 mL/min,  $\lambda = 230$  nm),  $t_R$  (minor) = 31.63 min,  $t_R$  (major) = 43.25 min.

**$^1\text{H}$  NMR** (400 MHz,  $\text{CDCl}_3$ )  $\delta$  7.23 – 7.16 (m, 5H), 7.14 – 7.07 (m, 3H), 4.46 (dd,  $J = 8.6, 7.0$  Hz, 1H), 2.31 (t,  $J = 7.1$  Hz, 2H), 2.26 (s, 6H), 2.19 – 2.08 (m, 1H), 2.08 – 1.98 (m, 1H), 1.79 – 1.66 (m, 1H), 1.64 – 1.53 (m, 1H).

**$^{13}\text{C}$  NMR** (100 MHz,  $\text{CDCl}_3$ )  $\delta$  144.9, 139.1, 138.8, 135.2, 128.8, 128.2, 127.6, 124.3, 119.0, 55.0, 35.4, 23.3, 21.2, 16.8.

**HRMS** (ESI)  $m/z$  calcd. for  $\text{C}_{19}\text{H}_{21}\text{NNaO}_2\text{S}_2$  [ $\text{M} + \text{Na}$ ] $^+$  382.0906, found: 382.0903.

**(R)-S-(3-(5,5-Dimethyl-1,3-dioxan-2-yl)-1-phenylpropyl) 3,5-dimethylbenzenesulfonothioate (15)**

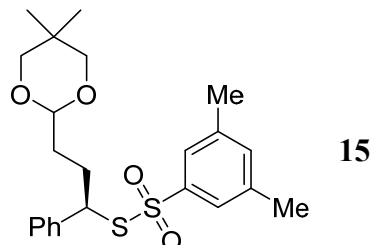

According to the **general procedure A** with 2-(3-bromo-3-phenylpropyl)-5,5-dimethyl-1,3-dioxane **E12** (62.0 mg, 0.20 mmol, 1.0 eq.) and sodium 3,5-dimethylbenzenesulfonothioate **S5** (53.8 mg, 0.24 mmol, 1.2 eq.) run at  $-15\text{ }^{\circ}\text{C}$  for 3 days, the reaction mixture was purified by column chromatography on silica gel (petroleum ether/EtOAc = 60/1~10/1) to yield the product **15** as a white solid (68.7 mg, 79% yield, 84% e.e.).

**HPLC** analysis: Chiralcel IC (*n*-hexane/*i*-PrOH = 80/20, flow rate 1.0 mL/min,  $\lambda = 214$  nm),  $t_R$  (minor) = 12.98 min,  $t_R$  (major) = 15.83 min.

**$^1\text{H}$  NMR** (400 MHz,  $\text{CDCl}_3$ )  $\delta$  7.16 (s, 2H), 7.15 – 7.09 (m, 5H), 7.05 (s, 1H), 4.50 (dd,  $J = 9.2, 6.6$  Hz, 1H), 4.35 (t,  $J = 4.8$  Hz, 1H), 3.54 (d,  $J = 11.1$  Hz, 2H), 3.35 (d,  $J = 11.0$  Hz, 2H), 2.24 (s, 6H), 2.17 – 2.06 (m, 1H), 2.04 – 1.92 (m, 1H), 1.69 – 1.60 (m, 1H), 1.56 – 1.45 (m, 1H), 1.13 (s, 3H), 0.69 (s, 3H).

**$^{13}\text{C}$  NMR** (100 MHz,  $\text{CDCl}_3$ )  $\delta$  145.1, 139.4, 138.9, 134.8, 128.4, 127.9, 127.8, 124.3, 101.1, 56.0, 32.5, 30.7, 30.2, 23.1, 21.9, 21.2.

**HRMS** (ESI)  $m/z$  calcd. for  $\text{C}_{23}\text{H}_{30}\text{NaO}_4\text{S}_2$  [ $\text{M} + \text{Na}$ ] $^+$  457.1478, found: 457.1476.

**(R)-S-(3-Bromo-1-phenylpropyl) 3,5-dimethylbenzenesulfonothioate (16)**

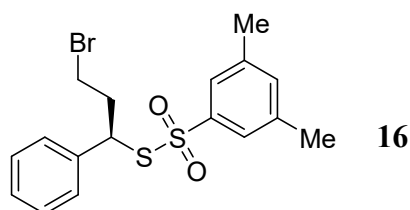

According to the **general procedure A** with (1,3-dibromopropyl)benzene **E13** (29.6  $\mu\text{L}$ , 0.20 mmol, 1.0 eq.) and sodium 3,5-dimethylbenzenesulfonothioate **S5** (53.8 mg, 0.24 mmol, 1.2 eq.) run at  $-15\text{ }^\circ\text{C}$  for 5 days, the reaction mixture was purified by column chromatography on silica gel (petroleum ether/EtOAc = 60/1~20/1) to yield the product **16** as a colorless oil (66.4 mg, 83% yield, 91% e.e.).

**HPLC** analysis: Chiralcel IC (*n*-hexane/*i*-PrOH = 90/10, flow rate 0.8 mL/min,  $\lambda = 214$  nm),  $t_R$  (minor) = 37.23 min,  $t_R$  (major) = 40.22 min.

**$^1\text{H}$  NMR** (400 MHz,  $\text{CDCl}_3$ )  $\delta$  7.29 (s, 2H), 7.23 – 7.19 (m, 3H), 7.16 – 7.11 (m, 3H), 4.66 (dd,  $J = 9.4, 6.1$  Hz, 1H), 3.40 – 3.29 (m, 1H), 3.15 – 3.05 (m, 1H), 2.59 – 2.47 (m, 1H), 2.47 – 2.35 (m, 1H), 2.29 (s, 6H).

**$^{13}\text{C}$  NMR** (100 MHz,  $\text{CDCl}_3$ )  $\delta$  144.7, 139.2, 137.9, 135.2, 128.9, 128.3, 127.8, 124.5, 53.6, 38.7, 29.9, 21.3.

**HRMS** (ESI)  $m/z$  calcd. for  $\text{C}_{17}\text{H}_{19}\text{BrNaO}_2\text{S}_2$  [ $\text{M} + \text{Na}$ ] $^+$  420.9902, found: 420.9899.

**(R)-S-(3-Chloro-1-phenylpropyl) 3,5-dimethylbenzenesulfonothioate (17)**

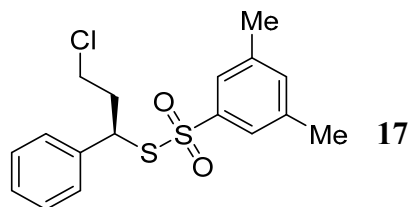

According to the **general procedure A** with (1-bromo-3-chloropropyl)benzene **E14** (45.0  $\mu\text{L}$ , 0.20 mmol, 1.0 eq.) and sodium 3,5-dimethylbenzenesulfonothioate **S5** (53.8 mg, 0.24 mmol, 1.2 eq.) run at  $-15\text{ }^\circ\text{C}$  for 5 days, the reaction mixture was purified by column chromatography on silica gel (petroleum ether/EtOAc = 60/1~20/1) to yield the product **17** as a white solid (52.4 mg, 74% yield, 91% e.e.).

**HPLC** analysis: Chiralcel IC (*n*-hexane/*i*-PrOH = 90/10, flow rate 0.8 mL/min,  $\lambda = 230$  nm),  $t_R$  (minor) = 37.59 min,  $t_R$  (major) = 40.53 min.

**$^1\text{H}$  NMR** (400 MHz,  $\text{CDCl}_3$ )  $\delta$  7.28 (s, 2H), 7.23 – 7.18 (m, 3H), 7.16 – 7.09 (m, 3H), 4.69 (dd,  $J = 9.4, 6.2$  Hz, 1H), 3.55 – 3.45 (m, 1H), 3.32 – 3.20 (m, 1H), 2.51 – 2.40 (m, 1H), 2.36 – 2.30 (m, 1H), 2.28 (s, 6H).

**$^{13}\text{C}$  NMR** (100 MHz,  $\text{CDCl}_3$ )  $\delta$  144.7, 139.2, 138.1, 135.2, 128.8, 128.3, 127.8, 124.5, 52.6, 41.7, 38.7, 21.2.

**HRMS** (ESI)  $m/z$  calcd. for  $\text{C}_{17}\text{H}_{20}\text{ClO}_2\text{S}_2$  [ $\text{M} + \text{H}$ ] $^+$  355.0588, found: 355.0581.

**(R)-S-(1-Phenylbut-3-en-1-yl) 3,5-dimethylbenzenesulfonothioate (18)**

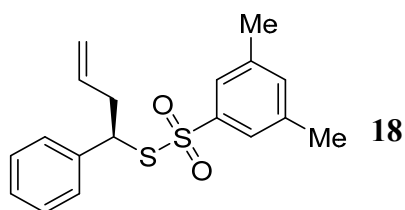

According to the **general procedure A** with (1-bromobut-3-en-1-yl)benzene **E15** (32.0  $\mu\text{L}$ , 0.20 mmol, 1.0 eq.) and sodium 3,5-dimethylbenzenesulfonothioate **S5** (53.8 mg, 0.24 mmol, 1.2 eq.) run at  $-15\text{ }^\circ\text{C}$  for 4 days, the reaction mixture was purified by column chromatography on silica gel (petroleum ether/EtOAc = 60/1~20/1) to yield the product **18** as a light yellow solid (53.2 mg, 80% yield, 90% e.e.).

**HPLC** analysis: Chiralcel IC (*n*-hexane/*i*-PrOH = 95/5, flow rate 0.6 mL/min,  $\lambda = 214\text{ nm}$ ),  $t_{\text{R}}$  (minor) = 35.60 min,  $t_{\text{R}}$  (major) = 38.52 min.

**$^1\text{H NMR}$**  (400 MHz,  $\text{CDCl}_3$ )  $\delta$  7.19 – 7.13 (m, 5H), 7.13 – 7.09 (m, 2H), 7.06 (s, 1H), 5.65 – 5.51 (m, 1H), 5.06 – 5.01 (m, 1H), 5.01 – 4.96 (m, 1H), 4.55 (dd,  $J = 8.3, 6.9\text{ Hz}$ , 1H), 2.72 – 2.61 (m, 2H), 2.24 (s, 6H).

**$^{13}\text{C NMR}$**  (100 MHz,  $\text{CDCl}_3$ )  $\delta$  145.0, 139.0, 138.9, 134.9, 133.5, 128.4, 127.9, 127.8, 124.3, 118.6, 55.5, 40.8, 21.2.

**HRMS** (ESI)  $m/z$  calcd. for  $\text{C}_{18}\text{H}_{21}\text{O}_2\text{S}_2$  [ $\text{M} + \text{H}$ ] $^+$  333.0977, found: 333.0970.

**(R)-S-(1-Phenylpent-4-en-1-yl) 3,5-dimethylbenzenesulfonothioate (19)**

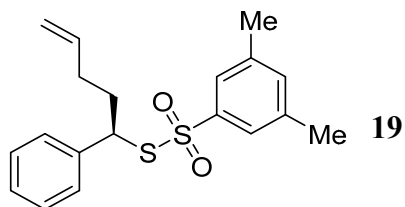

According to the **general procedure B** with (1-bromopent-4-en-1-yl)benzene **E16** (42.6  $\mu\text{L}$ , 0.20 mmol, 1.0 eq.) and sodium 3,5-dimethylbenzenesulfonothioate **S5** (53.8 mg, 0.24 mmol, 1.2 eq.) run at  $-15\text{ }^\circ\text{C}$  for 5 days, the reaction mixture was purified by column chromatography on silica gel (petroleum ether/EtOAc = 60/1~20/1) to yield the product **19** as a light yellow solid (60.0 mg, 87% yield, 90% e.e.).

**HPLC** analysis: Chiralcel IC (*n*-hexane/*i*-PrOH = 95/5, flow rate 0.6 mL/min,  $\lambda = 214\text{ nm}$ ),  $t_{\text{R}}$  (minor) = 39.92 min,  $t_{\text{R}}$  (major) = 42.99 min.

**$^1\text{H NMR}$**  (400 MHz,  $\text{CDCl}_3$ )  $\delta$  7.20 – 7.14 (m, 5H), 7.12 – 7.08 (m, 2H), 7.06 (s, 1H), 5.78 – 5.64 (m, 1H), 5.02 – 4.91 (m, 2H), 4.49 (t,  $J = 7.3\text{ Hz}$ , 1H), 2.25 (s, 6H), 2.09 – 1.92 (m, 4H).

**$^{13}\text{C NMR}$**  (100 MHz,  $\text{CDCl}_3$ )  $\delta$  145.1, 139.3, 138.9, 136.7, 134.9, 128.5, 127.8 (two carbon overlapped), 124.3, 116.1, 55.2, 35.5, 31.2, 21.2.

**HRMS** (ESI)  $m/z$  calcd. for  $\text{C}_{19}\text{H}_{22}\text{O}_2\text{S}_2$  [ $\text{M} + \text{H}$ ] $^+$  347.1134, found: 347.1132.



**(R)-S-(1,2,3,4-Tetrahydronaphthalen-1-yl) 3,5-dimethylbenzenesulfonothioate (20)**

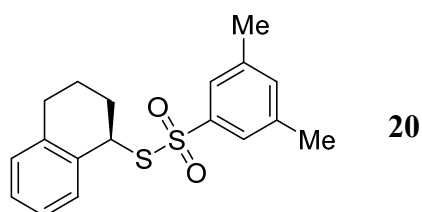

According to the **general procedure A** with 1-bromo-1,2,3,4-tetrahydronaphthalene **E17** (32.0  $\mu$ L, 0.20 mmol, 1.0 eq.) and sodium 3,5-dimethylbenzenesulfonothioate **S5** (53.8 mg, 0.24 mmol, 1.2 eq.) run at  $-15\text{ }^{\circ}\text{C}$  for 3 days, the reaction mixture was purified by column chromatography on silica gel (petroleum ether/EtOAc = 60/1 ~ 20/1) to yield the product **20** as a yellow solid (50.9 mg, 77% yield, 77% e.e.).

**HPLC** analysis: Chiralcel IE (*n*-hexane/*i*-PrOH = 90/10, flow rate 0.8 mL/min,  $\lambda = 230$  nm),  $t_R$  (major) = 18.18 min,  $t_R$  (minor) = 19.40 min.

**$^1\text{H}$  NMR** (400 MHz,  $\text{CDCl}_3$ )  $\delta$  7.62 (s, 2H), 7.27 (s, 1H), 7.15 – 7.09 (m, 1H), 7.08 – 6.97 (m, 3H), 4.72 (t,  $J = 3.7$  Hz, 1H), 2.84 – 2.63 (m, 2H), 2.42 (s, 6H), 2.33 – 2.23 (m, 1H), 2.14 – 2.02 (m, 1H), 1.98 – 1.87 (m, 1H), 1.87 – 1.75 (m, 1H).

**$^{13}\text{C}$  NMR** (100 MHz,  $\text{CDCl}_3$ )  $\delta$  145.0, 139.5, 138.1, 135.4, 132.7, 130.7, 129.5, 127.9, 126.3, 124.6, 51.3, 30.1, 28.7, 21.4, 19.0.

**HRMS** (ESI)  $m/z$  calcd. for  $\text{C}_{18}\text{H}_{20}\text{NaO}_2\text{S}_2$   $[\text{M} + \text{Na}]^+$  355.0797, found: 355.0797.

**(R)-S-(1-(*m*-Tolyl)propyl) 3,5-dimethylbenzenesulfonothioate (21)**

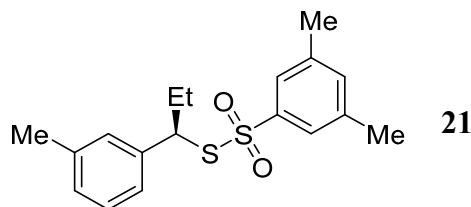

According to the **general procedure A** with 1-(1-bromopropyl)-3-methylbenzene **E18** (42.4  $\mu$ L, 0.20 mmol, 1.0 eq.) and sodium 3,5-dimethylbenzenesulfonothioate **S5** (53.8 mg, 0.24 mmol, 1.2 eq.) run at  $-15\text{ }^{\circ}\text{C}$  for 7 days, the reaction mixture was purified by column chromatography on silica gel (petroleum ether/EtOAc = 60/1 ~ 20/1) to yield the product **21** as a colorless oil (48.1 mg, 72% yield, 90% e.e.).

**HPLC** analysis: Chiralcel IC (*n*-hexane/*i*-PrOH = 90/10, flow rate 0.8 mL/min,  $\lambda = 214$  nm),  $t_R$  (minor) = 18.87 min,  $t_R$  (major) = 21.01 min.

**$^1\text{H}$  NMR** (400 MHz,  $\text{CDCl}_3$ )  $\delta$  7.16 (s, 2H), 7.08 – 7.02 (m, 2H), 6.94 (d,  $J = 7.7$  Hz, 1H), 6.90 (d,  $J = 7.8$  Hz, 1H), 6.86 (s, 1H), 4.37 (dd,  $J = 8.8, 6.5$  Hz, 1H), 2.25 (s, 6H), 2.20 (s, 3H), 2.05 – 1.94 (m, 1H), 1.93 – 1.81 (m, 1H), 0.88 (t,  $J = 7.3$  Hz, 3H).

**$^{13}\text{C}$  NMR** (100 MHz,  $\text{CDCl}_3$ )  $\delta$  145.2, 139.3, 138.8, 138.1, 134.7, 128.5, 128.4, 128.2, 125.0, 124.3, 57.7, 29.9, 21.4, 21.2, 12.1.

**HRMS** (ESI)  $m/z$  calcd. for  $\text{C}_{18}\text{H}_{22}\text{NaO}_2\text{S}_2$   $[\text{M} + \text{Na}]^+$  357.0953, found: 357.0951.

**(R)-S-(1-(*p*-Tolyl)propyl) 3,5-dimethylbenzenesulfonothioate (22)**

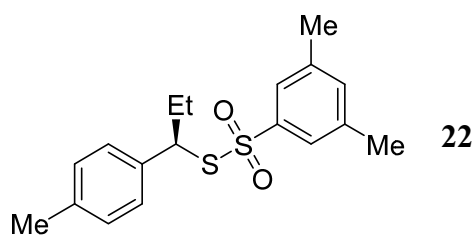

According to the **general procedure A** with 1-(1-bromopropyl)-4-methylbenzene **E19** (63.2  $\mu$ L, 0.20 mmol, 1.0 eq.) and sodium 3,5-dimethylbenzenesulfonothioate **S5** (53.8 mg, 0.24 mmol, 1.2 eq.) run at  $-15\text{ }^{\circ}\text{C}$  for 7 days, the reaction mixture was purified by column chromatography on silica gel (petroleum ether/EtOAc = 60/1 ~ 20/1) to yield the product **22** as a colorless oil (54.8 mg, 82% yield, 90% e.e.).

**HPLC** analysis: Chiralcel IC (*n*-hexane/*i*-PrOH = 90/10, flow rate 0.8 mL/min,  $\lambda = 214$  nm),  $t_R$  (minor) = 20.35 min,  $t_R$  (major) = 22.63 min.

**$^1\text{H}$  NMR** (400 MHz,  $\text{CDCl}_3$ )  $\delta$  7.16 (s, 2H), 7.06 (s, 1H), 6.99 (d,  $J = 8.1$  Hz, 2H), 6.95 (d,  $J = 8.2$  Hz, 2H), 4.38 (dd,  $J = 9.0, 6.4$  Hz, 1H), 2.27 (s, 3H), 2.25 (s, 6H), 2.06 – 1.94 (m, 1H), 1.93 – 1.81 (m, 1H), 0.87 (t,  $J = 7.3$  Hz, 3H).

**$^{13}\text{C}$  NMR** (100 MHz,  $\text{CDCl}_3$ )  $\delta$  145.2, 138.8, 137.4, 136.4, 134.6, 129.1, 127.8, 124.4, 57.6, 29.9, 21.2 (two carbon overlapped), 12.1.

**HRMS** (ESI)  $m/z$  calcd. for  $\text{C}_{18}\text{H}_{22}\text{NaO}_2\text{S}_2$  [ $\text{M} + \text{Na}$ ] $^+$  357.0953, found: 357.0951.

**(R)-S-(1-(*o*-Tolyl)propyl) 3,5-dimethylbenzenesulfonothioate (23)**

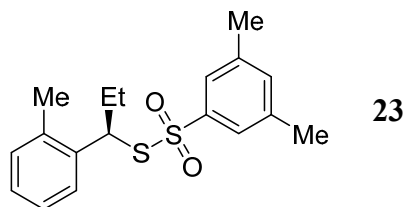

According to the **general procedure A** with 1-(1-bromopropyl)-2-methylbenzene **E20** (43.6  $\mu$ L, 0.20 mmol, 1.0 equiv) and sodium 3,5-dimethylbenzenesulfonothioate **S5** (53.8 mg, 0.24 mmol, 1.2 equiv) run at  $-15\text{ }^{\circ}\text{C}$  for 7 days, the reaction mixture was purified by column chromatography on silica gel (petroleum ether) to yield the product **23** as a colorless oil (50.3 mg, 75% yield, 91% e.e.).

**HPLC** analysis: Chiralcel IC (*n*-hexane/*i*-PrOH = 90/10, flow rate 0.8 mL/min,  $\lambda = 214$  nm),  $t_R$  (minor) = 18.99 min,  $t_R$  (major) = 21.15 min.

**$^1\text{H}$  NMR** (400 MHz,  $\text{CDCl}_3$ )  $\delta$  7.23 (s, 2H), 7.10 – 7.02 (m, 4H), 7.00 – 6.94 (m, 1H), 4.69 (dd,  $J = 9.2, 6.1$  Hz, 1H), 2.31 – 2.25 (m, 9H), 2.12 – 2.02 (m, 1H), 2.02 – 1.89 (m, 1H), 0.88 (t,  $J = 7.3$  Hz, 3H).

**$^{13}\text{C}$  NMR** (100 MHz,  $\text{CDCl}_3$ )  $\delta$  145.1, 139.0, 137.1, 136.1, 134.9, 130.4, 127.6, 127.4, 126.4, 124.3, 53.3, 29.8, 21.3, 19.5, 12.0.

**HRMS** (ESI)  $m/z$  calcd. for  $\text{C}_{18}\text{H}_{22}\text{NaO}_2\text{S}_2$  [ $\text{M} + \text{Na}$ ] $^+$  357.0953, found: 357.0952.

**(R)-S-(1-(3-Methoxyphenyl)propyl) 3,5-dimethylbenzenesulfonothioate (24)**

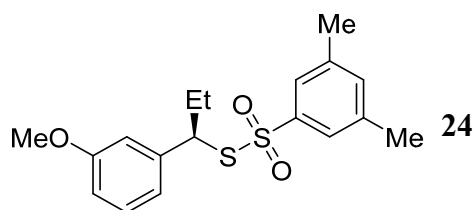

According to the **general procedure A** with 1-(1-bromopropyl)-3-methoxybenzene **E21** (49.2  $\mu$ L, 0.20 mmol, 1.0 eq.) and sodium 3,5-dimethylbenzenesulfonothioate **S5** (53.8 mg, 0.24 mmol, 1.2 eq.) run at  $-15\text{ }^{\circ}\text{C}$  for 5 days, the reaction mixture was purified by column chromatography on silica gel (petroleum ether/EtOAc = 60/1 ~ 20/1) to yield the product **24** as a white solid (50.8 mg, 72% yield, 92% e.e.).

**HPLC** analysis: Chiralcel IC (*n*-hexane/*i*-PrOH = 90/10, flow rate 0.8 mL/min,  $\lambda = 214$  nm),  $t_R$  (minor) = 20.14 min,  $t_R$  (major) = 22.10 min.

**$^1\text{H}$  NMR** (400 MHz,  $\text{CDCl}_3$ )  $\delta$  7.18 (s, 2H), 7.11 – 7.03 (m, 2H), 6.73 – 6.63 (m, 2H), 6.60 (t,  $J = 2.1$  Hz, 1H), 4.37 (dd,  $J = 8.8, 6.5$  Hz, 1H), 3.68 (s, 3H), 2.25 (s, 6H), 2.05 – 1.93 (m, 1H), 1.93 – 1.80 (m, 1H), 0.89 (t,  $J = 7.3$  Hz, 3H).

**$^{13}\text{C}$  NMR** (100 MHz,  $\text{CDCl}_3$ )  $\delta$  159.6, 145.2, 140.9, 138.8, 134.8, 129.3, 124.3, 120.4, 113.3, 113.2, 57.7, 55.1, 29.8, 21.2, 12.1.

**HRMS** (ESI)  $m/z$  calcd. for  $\text{C}_{18}\text{H}_{22}\text{NaO}_3\text{S}_2$   $[\text{M} + \text{Na}]^+$  373.0903, found: 373.0901.

**(R)-S-(1-([1,1'-Biphenyl]-4-yl)propyl) 3,5-dimethylbenzenesulfonothioate (25)**

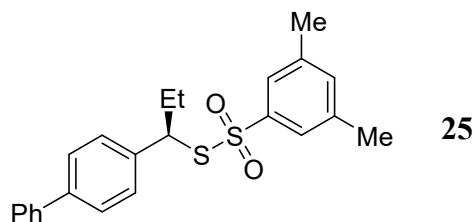

According to the **general procedure A** with 4-(1-bromopropyl)-1,1'-biphenyl **E22** (55.0 mg, 0.20 mmol, 1.0 eq.) and sodium 3,5-dimethylbenzenesulfonothioate **S5** (53.8 mg, 0.24 mmol, 1.2 eq.) run at  $-15\text{ }^{\circ}\text{C}$  for 5 days, the reaction mixture was purified by column chromatography on silica gel (petroleum ether/EtOAc = 60/1 ~ 20/1) to yield the product **25** as a colorless oil (69.8 mg, 88% yield, 92% e.e.).

**HPLC** analysis: Chiralcel IC (*n*-hexane/*i*-PrOH = 90/10, flow rate 0.8 mL/min,  $\lambda = 214$  nm),  $t_R$  (minor) = 23.00 min,  $t_R$  (major) = 25.91 min.

**$^1\text{H}$  NMR** (400 MHz,  $\text{CDCl}_3$ )  $\delta$  7.51 (d,  $J = 7.6$  Hz, 2H), 7.44 (t,  $J = 7.5$  Hz, 2H), 7.39 – 7.32 (m, 3H), 7.21 – 7.12 (m, 4H), 7.01 (s, 1H), 4.47 (dd,  $J = 8.7, 6.6$  Hz, 1H), 2.18 (s, 6H), 2.10 – 1.98 (m, 1H), 1.98 – 1.85 (m, 1H), 0.93 (t,  $J = 7.3$  Hz, 3H).

**$^{13}\text{C}$  NMR** (100 MHz,  $\text{CDCl}_3$ ) 145.1, 140.4(3), 140.4(2), 138.9, 138.5, 134.7, 129.0, 128.3, 127.6, 126.9(5), 126.9(4), 124.4, 57.5, 29.9, 21.2, 12.1.

**HRMS** (ESI)  $m/z$  calcd. for  $\text{C}_{23}\text{H}_{24}\text{NaO}_2\text{S}_2$   $[\text{M} + \text{Na}]^+$  419.1110, found: 419.1111.

**(R)-S-(1-(3-Fluorophenyl)propyl) 3,5-dimethylbenzenesulfonothioate (26)**

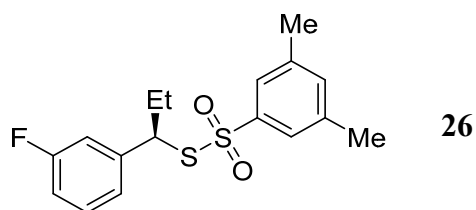

According to the **general procedure A** with 1-(1-bromopropyl)-3-fluorobenzene **E23** (35.2  $\mu$ L, 0.20 mmol, 1.0 eq.) and sodium 3,5-dimethylbenzenesulfonothioate **S5** (53.8 mg, 0.24 mmol, 1.2 eq.) run at  $-15\text{ }^{\circ}\text{C}$  for 3 days, the reaction mixture was purified by column chromatography on silica gel (petroleum ether/EtOAc = 60/1 ~ 20/1) to yield the product **26** as a colorless oil (47.9 mg, 71% yield, 93% e.e.).

**HPLC** analysis: Chiralcel IC (*n*-hexane/*i*-PrOH = 90/10, flow rate 0.8 mL/min,  $\lambda = 214$  nm),  $t_R$  (minor) = 16.32 min,  $t_R$  (major) = 18.80 min.

**$^1\text{H}$  NMR** (400 MHz,  $\text{CDCl}_3$ )  $\delta$  7.17 (s, 2H), 7.15 – 7.09 (m, 1H), 7.06 (s, 1H), 6.93 – 6.88 (m, 1H), 6.85 – 6.79 (m, 1H), 6.79 – 6.74 (m, 1H), 4.38 (dd,  $J = 8.7, 6.6$  Hz, 1H), 2.25 (s, 6H), 2.04 – 1.92 (m, 1H), 1.90 – 1.78 (m, 1H), 0.89 (t,  $J = 7.3$  Hz, 3H).

**$^{13}\text{C}$  NMR** (100 MHz,  $\text{CDCl}_3$ )  $\delta$  162.7 (d,  $J = 246.6$  Hz), 145.0, 142.1 (d,  $J = 7.0$  Hz), 139.0, 135.0, 129.8 (d,  $J = 8.3$  Hz), 124.3, 123.7 (d,  $J = 2.9$  Hz), 114.8 (d,  $J = 13.4$  Hz), 114.5 (d,  $J = 12.4$  Hz), 57.0 (d,  $J = 1.9$  Hz), 29.7, 21.2, 12.0.

**$^{19}\text{F}$  NMR** (376 MHz,  $\text{CDCl}_3$ )  $\delta$   $-112.85$ .

**HRMS** (ESI)  $m/z$  calcd. for  $\text{C}_{17}\text{H}_{19}\text{FNaO}_2\text{S}_2$  [ $\text{M} + \text{Na}$ ] $^+$  361.0703, found: 361.0701.

**(R)-S-(1-(3-Chlorophenyl)propyl) 3,5-dimethylbenzenesulfonothioate (27)**

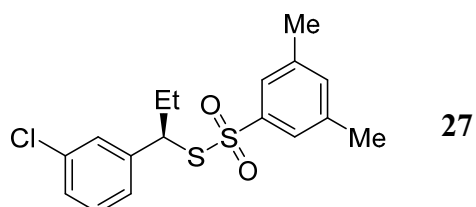

According to the **general procedure A** with 1-(1-bromopropyl)-3-chlorobenzene **E24** (37.0  $\mu$ L, 0.20 mmol, 1.0 eq.) and sodium 3,5-dimethylbenzenesulfonothioate **S5** (53.8 mg, 0.24 mmol, 1.2 eq.) run at  $-15\text{ }^{\circ}\text{C}$  for 3.5 days, the reaction mixture was purified by column chromatography on silica gel (petroleum ether) to yield the product **27** as a colorless oil (48.0 mg, 68% yield, 92% e.e.).

**HPLC** analysis: Chiralcel IC (*n*-hexane/*i*-PrOH = 90/10, flow rate 0.8 mL/min,  $\lambda = 230$  nm),  $t_R$  (minor) = 15.23 min,  $t_R$  (major) = 17.25 min.

**$^1\text{H}$  NMR** (400 MHz,  $\text{CDCl}_3$ )  $\delta$  7.14 (s, 2H), 7.10 – 7.04 (m, 3H), 7.03 – 6.96 (m, 2H), 4.36 (dd,  $J = 8.5, 6.8$  Hz, 1H), 2.26 (s, 6H), 2.02 – 1.90 (m, 1H), 1.89 – 1.77 (m, 1H), 0.90 (t,  $J = 7.3$  Hz, 3H).

**$^{13}\text{C}$  NMR** (100 MHz,  $\text{CDCl}_3$ )  $\delta$  144.8, 141.5, 139.0, 135.1, 134.3, 129.4, 127.9, 127.7, 126.2, 124.2, 56.9, 29.7, 21.2, 12.0.

**HRMS** (ESI)  $m/z$  calcd. for  $\text{C}_{17}\text{H}_{19}\text{ClNaO}_2\text{S}_2$  [ $\text{M} + \text{Na}$ ] $^+$  377.0407, found: 377.0405.

**(R)-S-(1-(4-Bromophenyl)propyl) 3,5-dimethylbenzenesulfonothioate (28)**

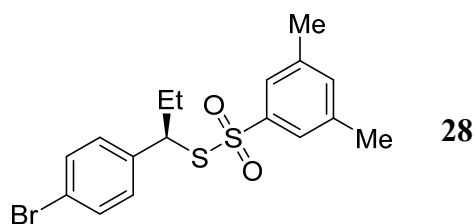

According to the **general procedure A** with 1-bromo-4-(1-bromopropyl)benzene **E25** (55.6 mg, 0.20 mmol, 1.0 eq.) and sodium 3,5-dimethylbenzenesulfonothioate **S5** (53.8 mg, 0.24 mmol, 1.2 eq.) run at  $-15\text{ }^{\circ}\text{C}$  for 5 days, the reaction mixture was purified by column chromatography on silica gel (petroleum ether/EtOAc = 60/1 ~ 20/1) to yield the product **28** as a white solid (70.0 mg, 88% yield, 92% e.e.).

**HPLC** analysis: Chiralcel IC (*n*-hexane/*i*-PrOH = 90/10, flow rate 1.0 mL/min,  $\lambda = 230$  nm),  $t_R$  (minor) = 13.67 min,  $t_R$  (major) = 16.24 min.

**$^1\text{H}$  NMR** (400 MHz,  $\text{CDCl}_3$ )  $\delta$  7.26 – 7.19 (m, 2H), 7.11 – 7.05 (m, 3H), 6.99 – 6.93 (m, 2H), 4.39 (dd,  $J = 8.8, 6.6$  Hz, 1H), 2.26 (s, 6H), 2.02 – 1.90 (m, 1H), 1.86 – 1.74 (m, 1H), 0.88 (t,  $J = 7.3$  Hz, 3H).

**$^{13}\text{C}$  NMR** (100 MHz,  $\text{CDCl}_3$ )  $\delta$  145.0, 138.9, 138.6, 134.7, 131.3, 129.6, 124.2, 121.5, 57.0, 29.6, 21.2, 12.0.

**HRMS** (ESI)  $m/z$  calcd. for  $\text{C}_{17}\text{H}_{19}\text{BrNaO}_2\text{S}_2$  [ $\text{M} + \text{Na}$ ] $^+$  420.9902, found: 420.9899.

**(R)-S-(1-(4-(Trifluoromethyl)phenyl)propyl) 3,5-dimethylbenzenesulfonothioate (29)**

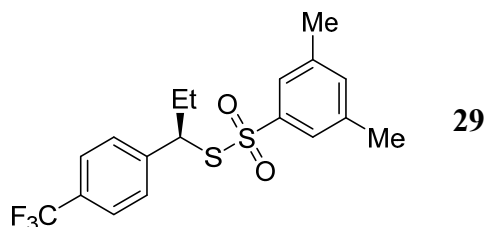

According to the **general procedure A** with 1-(1-bromopropyl)-4-(trifluoromethyl)benzene **E26** (45.8 mg, 0.20 mmol, 1.0 eq.) and sodium 3,5-dimethylbenzenesulfonothioate **S5** (53.8 mg, 0.24 mmol, 1.2 eq.) run at  $-15\text{ }^{\circ}\text{C}$  for 3.5 days, the reaction mixture was purified by column chromatography on silica gel (petroleum ether/EtOAc = 60/1 ~ 20/1) to yield the product **29** as a white solid (58.4 mg, 75% yield, 92% e.e.).

**HPLC** analysis: Chiralcel IC (*n*-hexane/*i*-PrOH = 95/5, flow rate 0.6 mL/min,  $\lambda = 214$  nm),  $t_R$  (minor) = 20.28 min,  $t_R$  (major) = 23.05 min.

**$^1\text{H}$  NMR** (400 MHz,  $\text{CDCl}_3$ )  $\delta$  7.37 (d,  $J = 8.1$  Hz, 2H), 7.21 (d,  $J = 8.1$  Hz, 2H), 7.12 (s, 2H), 7.02 (s, 1H), 4.46 (dd,  $J = 8.5, 6.8$  Hz, 1H), 2.22 (s, 6H), 2.05 – 1.94 (m, 1H), 1.92 – 1.80 (m, 1H), 0.90 (t,  $J = 7.3$  Hz, 3H).

**$^{13}\text{C}$  NMR** (100 MHz,  $\text{CDCl}_3$ )  $\delta$  144.8, 143.8, 139.0, 135.0, 129.8 (q,  $J = 32.4$  Hz), 128.3, 125.2 (q,  $J = 3.7$  Hz), 124.3, 124.0 (q,  $J = 272.1$  Hz), 56.9, 29.7, 21.0, 12.0.

**$^{19}\text{F}$  NMR** (376 MHz,  $\text{CDCl}_3$ )  $\delta$  -62.67.

**HRMS** (ESI)  $m/z$  calcd. for  $\text{C}_{18}\text{H}_{19}\text{F}_3\text{NaO}_2\text{S}_2$  [ $\text{M} + \text{Na}$ ] $^+$  411.0671, found: 411.0661.

**(R)-S-(1-(3-Cyanophenyl)ethyl) 3,5-dimethylbenzenesulfonothioate (30)**

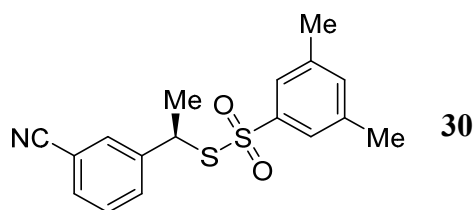

According to the **general procedure A** with 1-(1-bromoethyl)-3-isocyanobenzene **E27** (35.4  $\mu$ L, 0.20 mmol, 1.0 eq.) and sodium 3,5-dimethylbenzenesulfonothioate **S5** (53.8 mg, 0.24 mmol, 1.2 eq.) run at  $-30\text{ }^{\circ}\text{C}$  for 5 days, the reaction mixture was purified by column chromatography on silica gel (petroleum ether/EtOAc = 50/1 ~ 5/1) to yield the product **30** as a colorless oil (59.2 mg, 89% yield, 88% e.e.).

**HPLC** analysis: Chiralcel IC (*n*-hexane/*i*-PrOH = 70/30, flow rate 0.8 mL/min,  $\lambda$  = 230 nm),  $t_R$  (major) = 29.46 min,  $t_R$  (minor) = 33.46 min.

**$^1\text{H}$  NMR** (400 MHz,  $\text{CDCl}_3$ )  $\delta$  7.46 – 7.39 (m, 2H), 7.36 – 7.26 (m, 2H), 7.18 (s, 2H), 7.13 (s, 1H), 4.66 (q,  $J$  = 7.3 Hz, 1H), 2.29 (s, 6H), 1.64 (d,  $J$  = 7.4, 3H).

**$^{13}\text{C}$  NMR** (100 MHz,  $\text{CDCl}_3$ )  $\delta$  144.6, 142.4, 139.3, 135.4, 131.9, 131.2, 130.8, 129.3, 124.3, 118.2, 112.6, 49.7, 22.5, 21.2.

**HRMS** (ESI)  $m/z$  calcd. for  $\text{C}_{17}\text{H}_{18}\text{NO}_2\text{S}_2$   $[\text{M} + \text{H}]^+$  332.0773, found: 332.0770.

**(R)-S-(1-(3-Acetylphenyl)ethyl) 3,5-dimethylbenzenesulfonothioate (31)**

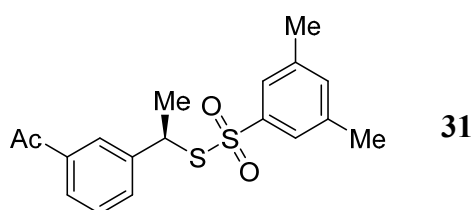

According to the **general procedure A** with 1-(3-(1-bromoethyl)phenyl)ethan-1-one **E28** (42.1  $\mu$ L, 0.20 mmol, 1.0 eq.) and sodium 3,5-dimethylbenzenesulfonothioate **S5** (53.8 mg, 0.24 mmol, 1.2 eq.) run at  $-30\text{ }^{\circ}\text{C}$  for 5 days, the reaction mixture was purified by column chromatography on silica gel (petroleum ether/EtOAc = 50/1 ~ 3/1) to yield the product **31** as a colorless oil (54.6 mg, 78% yield, 89% e.e.).

**HPLC** analysis: Chiralcel IE (*n*-hexane/*i*-PrOH = 90/10, flow rate 0.8 mL/min,  $\lambda$  = 214 nm),  $t_R$  (major) = 55.27 min,  $t_R$  (minor) = 61.52 min.

**$^1\text{H}$  NMR** (400 MHz,  $\text{CDCl}_3$ )  $\delta$  7.74 (d,  $J$  = 7.8 Hz, 1H), 7.68 (s, 1H), 7.40 (d,  $J$  = 7.9 Hz, 1H), 7.31 (t,  $J$  = 7.7 Hz, 1H), 7.19 (s, 2H), 7.05 (s, 1H), 4.71 (q,  $J$  = 7.3 Hz, 1H), 2.50 (s, 3H), 2.25 (s, 6H), 1.67 (d,  $J$  = 7.2 Hz, 3H).

**$^{13}\text{C}$  NMR** (100 MHz,  $\text{CDCl}_3$ )  $\delta$  197.3, 144.8, 141.3, 139.1, 137.3, 135.0, 132.1, 128.8, 127.7, 127.0, 124.3, 50.4, 26.7, 22.7, 21.2.

**HRMS** (ESI)  $m/z$  calcd. for  $\text{C}_{18}\text{H}_{20}\text{NaO}_3\text{S}_2$   $[\text{M} + \text{Na}]^+$  371.0746, found: 371.0744.

### Methyl (*R*)-3-(1-(((3,5-dimethylphenyl)sulfonyl)thio)ethyl)benzoate (**32**)

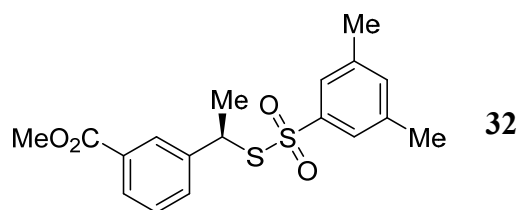

According to the **general procedure A** with methyl 3-(1-bromoethyl)benzoate **E29** (41.2  $\mu$ L, 0.20 mmol, 1.0 eq.) and sodium 3,5-dimethylbenzenesulfonylthioate **S5** (53.8 mg, 0.24 mmol, 1.2 eq.) run at  $-30\text{ }^{\circ}\text{C}$  for 5 days, the reaction mixture was purified by column chromatography on silica gel (petroleum ether/EtOAc = 50/1 ~ 10/1) to yield the product **32** as a colorless oil (63.6 mg, 87% yield, 87% e.e.).

**HPLC** analysis: Chiralcel IE (*n*-hexane/*i*-PrOH = 80/20, flow rate 0.8 mL/min,  $\lambda = 254$  nm),  $t_R$  (major) = 24.46 min,  $t_R$  (minor) = 26.68 min.

**$^1\text{H}$  NMR** (400 MHz,  $\text{CDCl}_3$ )  $\delta$  7.83 – 7.78 (m, 1H), 7.76 (s, 1H), 7.36 (d,  $J = 7.6$  Hz, 1H), 7.29 – 7.22 (m, 1H), 7.18 (s, 2H), 7.03 (s, 1H), 4.70 (q,  $J = 7.3$  Hz, 1H), 3.90 (s, 3H), 2.24 (s, 6H), 1.66 (d,  $J = 7.0$  Hz, 3H).

**$^{13}\text{C}$  NMR** (100 MHz,  $\text{CDCl}_3$ )  $\delta$  166.5, 144.8, 141.1, 139.0, 134.9, 132.0, 130.4, 129.0, 128.5, 128.3, 124.3, 52.3, 50.4, 22.7, 21.2.

**HRMS** (ESI)  $m/z$  calcd. for  $\text{C}_{18}\text{H}_{21}\text{O}_4\text{S}_2$  [ $\text{M} + \text{H}$ ] $^+$  365.0876, found: 365.0870.

### (*R*)-*S*-(1-(Naphthalen-1-yl)propyl) 3,5-dimethylbenzenesulfonylthioate (**33**)

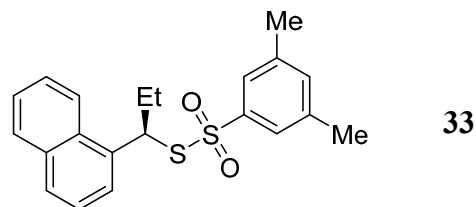

According to the **general procedure A** with 1-(1-bromopropyl)naphthalene **E30** (49.8 mg, 0.20 mmol, 1.0 eq.) and sodium 3,5-dimethylbenzenesulfonylthioate **S5** (53.8 mg, 0.24 mmol, 1.2 eq.) run at  $-15\text{ }^{\circ}\text{C}$  for 5 days, the reaction mixture was purified by column chromatography on silica gel (petroleum ether/EtOAc = 60/1 ~ 20/1) to yield the product **33** as a white solid (63.5 mg, 86% yield, 93% e.e.).

**HPLC** analysis: Chiralcel IE (*n*-hexane/*i*-PrOH = 92/8, flow rate 0.0 mL/min,  $\lambda = 214$  nm),  $t_R$  (minor) = 23.82 min,  $t_R$  (major) = 25.01 min.

**$^1\text{H}$  NMR** (400 MHz,  $\text{CDCl}_3$ )  $\delta$  7.97 – 7.88 (m, 1H), 7.83 – 7.75 (m, 1H), 7.64 (d,  $J = 8.2$  Hz, 1H), 7.50 – 7.42 (m, 2H), 7.35 (d,  $J = 7.2$  Hz, 1H), 7.27 – 7.23 (m, 1H), 7.11 (s, 2H), 6.94 (s, 1H), 5.20 (s, 1H), 2.29 – 2.16 (m, 2H), 2.10 (s, 6H), 0.92 (t,  $J = 7.4$  Hz, 3H).

**$^{13}\text{C}$  NMR** (100 MHz,  $\text{CDCl}_3$ )  $\delta$  144.5, 138.8, 134.8, 134.5, 133.9, 131.0, 129.0, 128.5, 126.5, 125.9, 125.1, 124.4 (two carbon overlapped), 122.8, 30.0, 29.8, 21.1, 12.3.

**HRMS** (ESI)  $m/z$  calcd. for  $\text{C}_{21}\text{H}_{22}\text{NaO}_2\text{S}_2$  [ $\text{M} + \text{Na}$ ] $^+$  393.0953, found: 393.0953.

**(R)-S-(1-(Naphthalen-2-yl)propyl) 3,5-dimethylbenzenesulfonothioate (34)**

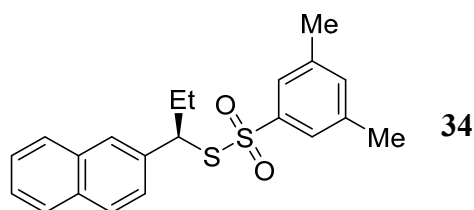

According to the **general procedure A** with 2-(1-bromopropyl)naphthalene **E31** (49.8 mg, 0.20 mmol, 1.0 eq.) and sodium 3,5-dimethylbenzenesulfonothioate **S5** (53.8 mg, 0.24 mmol, 1.2 eq.) run at  $-15\text{ }^{\circ}\text{C}$  for 5 days, the reaction mixture was purified by column chromatography on silica gel (petroleum ether/EtOAc = 60/1 ~ 20/1) to yield the product **34** as a white solid (64.6 mg, 87% yield, 93% e.e.).

**HPLC** analysis: Chiralcel IC (*n*-hexane/*i*-PrOH = 90/10, flow rate 0.8 mL/min,  $\lambda = 254$  nm),  $t_R$  (minor) = 21.78 min,  $t_R$  (major) = 24.07 min.

**$^1\text{H}$  NMR** (400 MHz,  $\text{CDCl}_3$ )  $\delta$  7.75 – 7.65 (m, 2H), 7.55 (d,  $J = 8.6$  Hz, 1H), 7.53 (s, 1H), 7.48 – 7.41 (m, 2H), 7.16 (dd,  $J = 8.5, 1.9$  Hz, 1H), 6.99 (s, 2H), 6.71 (s, 1H), 4.60 (dd,  $J = 9.0, 6.5$  Hz, 1H), 2.12 – 2.01 (m, 1H), 2.00 – 1.92 (m, 1H), 1.91 (s, 6H), 0.92 (t,  $J = 7.3$  Hz, 3H).

**$^{13}\text{C}$  NMR** (100 MHz,  $\text{CDCl}_3$ )  $\delta$  144.9, 138.6, 136.4, 134.4, 132.9, 132.8, 128.2, 127.9, 127.6, 127.3, 126.3(2), 126.3(0), 125.1, 124.1, 58.0, 29.4, 20.7, 12.1.

**HRMS** (ESI)  $m/z$  calcd. for  $\text{C}_{21}\text{H}_{22}\text{NaO}_2\text{S}_2$  [ $\text{M} + \text{Na}$ ] $^+$  393.0953, found: 393.0953.

**34** was prepared from 2-(1-chloropropyl)naphthalene **E36**:

Under argon atmosphere, an oven-dried resealable Schlenk tube equipped with a magnetic stir bar was charged with sodium 3,5-dimethylbenzenesulfonothioate **S5** (53.8 mg, 0.24 mmol, 1.2 eq.),  $\text{Cu}(\text{MeCN})_4\text{BF}_4$  (12.6 mg, 0.04 mmol, 20 mol%), **L\*5** (31.2 mg, 0.04 mmol, 20 mol%) and  $\text{Cs}_2\text{CO}_3$  (260 mg, 0.80 mmol, 4.0 eq.). Then, 2-(1-chloropropyl)naphthalene **E36** (40.9 mg, 0.20 mmol, 1.0 eq.) and toluene/DMF (v/v = 10/1, 2.2 mL) were sequentially added into the mixture and the reaction mixture was stirred at  $-15\text{ }^{\circ}\text{C}$  for 7 days, the reaction mixture was purified by column chromatography on silica gel (petroleum ether/EtOAc = 60/1 ~ 20/1) to yield the product **34** as a white solid (29.7 mg, 40% yield, 91% e.e.).

**HPLC** analysis: Chiralcel IC (*n*-hexane/*i*-PrOH = 90/10, flow rate 0.8 mL/min,  $\lambda = 254$  nm),  $t_R$  (minor) = 20.94 min,  $t_R$  (major) = 23.21 min.

**(R)-S-(1-(Benzo[*b*]thiophen-3-yl)propyl) 3,5-dimethylbenzenesulfonothioate (35)**

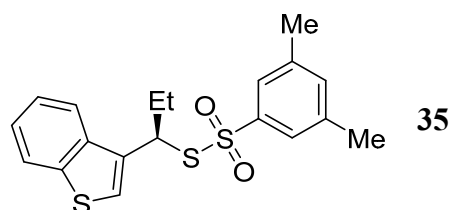

According to the **general procedure A** with 3-(1-bromopropyl)benzo[*b*]thiophene **E32**



(51.2 mg, 0.20 mmol, 1.0 eq.) and sodium 3,5-dimethylbenzenesulfonothioate **S5** (53.8 mg, 0.24 mmol, 1.2 eq.) run at  $-15\text{ }^{\circ}\text{C}$  for 4 days, the reaction mixture was purified by column chromatography on silica gel (petroleum ether/EtOAc = 60/1 ~ 20/1) to yield the product **35** as a colorless oil (56.9 mg, 76% yield, 92% e.e.).

**HPLC** analysis: Chiralcel IB (*n*-hexane/*i*-PrOH = 95/5, flow rate 0.6 mL/min,  $\lambda = 254$  nm),  $t_{\text{R}}$  (major) = 13.61 min,  $t_{\text{R}}$  (minor) = 16.24 min.

**$^1\text{H}$  NMR** (400 MHz,  $\text{CDCl}_3$ )  $\delta$  7.75 – 7.70 (m, 1H), 7.65 – 7.59 (m, 1H), 7.31 – 7.26 (m, 2H), 7.18 (s, 1H), 7.15 (s, 2H), 6.94 (s, 1H), 4.78 (dd,  $J = 8.4, 6.7$  Hz, 1H), 2.20 – 2.11 (m, 8H), 0.96 (t,  $J = 7.3$  Hz, 3H).

**$^{13}\text{C}$  NMR** (100 MHz,  $\text{CDCl}_3$ )  $\delta$  144.5, 140.5, 138.8, 136.9, 134.8, 133.0, 125.3, 124.6, 124.3, 124.1, 122.8, 121.9, 51.5, 28.7, 21.1, 12.3.

**HRMS** (ESI)  $m/z$  calcd. for  $\text{C}_{19}\text{H}_{20}\text{NaO}_2\text{S}_3$  [ $\text{M} + \text{Na}$ ] $^+$  399.0518, found: 399.0515.

### (*R*)-*S*-(1-(Thiophen-3-yl)propyl) 3,5-dimethylbenzenesulfonothioate (**36**)

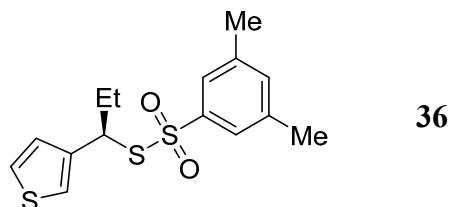

According to the **general procedure A** with 3-(1-bromopropyl)thiophene **E33** (34.4  $\mu\text{L}$ , 0.20 mmol, 1.0 eq.) and sodium 3,5-dimethylbenzenesulfonothioate **S5** (53.8 mg, 0.24 mmol, 1.2 eq.) run at  $-15\text{ }^{\circ}\text{C}$  for 4 days, the reaction mixture was purified by column chromatography on silica gel (petroleum ether/EtOAc = 60/1 ~ 20/1) to yield the product **36** as a colorless oil (44.5 mg, 68% yield, 88% e.e.).

**HPLC** analysis: Chiralcel IC (*n*-hexane/*i*-PrOH = 90/10, flow rate 0.8 mL/min,  $\lambda = 214$  nm),  $t_{\text{R}}$  (minor) = 19.47 min,  $t_{\text{R}}$  (major) = 22.40 min.

**$^1\text{H}$  NMR** (400 MHz,  $\text{CDCl}_3$ )  $\delta$  7.26 – 7.23 (m, 2H), 7.13 – 7.08 (m, 2H), 7.01 – 6.99 (m, 1H), 6.80 (dd,  $J = 5.0, 1.3$  Hz, 1H), 4.54 (dd,  $J = 8.6, 6.5$  Hz, 1H), 2.32 – 2.29 (m, 6H), 2.06 – 1.95 (m, 1H), 1.95 – 1.84 (m, 1H), 0.90 (t,  $J = 7.3$  Hz, 3H).

**$^{13}\text{C}$  NMR** (100 MHz,  $\text{CDCl}_3$ )  $\delta$  145.2, 140.2, 139.0, 134.9, 126.6, 126.1, 124.3, 122.9, 52.9, 29.5, 21.3, 12.0.

**HRMS** (ESI)  $m/z$  calcd. for  $\text{C}_{15}\text{H}_{18}\text{NaO}_2\text{S}_3$  [ $\text{M} + \text{Na}$ ] $^+$  349.0361, found: 349.0359.

### (*R*)-*S*-(1-(Quinolin-3-yl)propyl) 3,5-dimethylbenzenesulfonothioate (**37**)

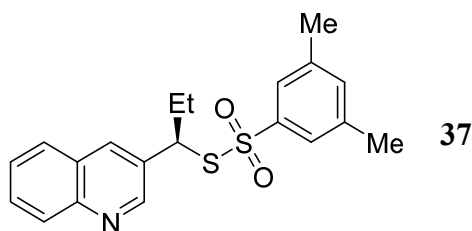

According to the **general procedure A** with 3-(1-bromopropyl)quinoline **E34** (50 mg, 0.20 mmol, 1.0 eq.) and sodium 3,5-dimethylbenzenesulfonothioate **S5** (53.8 mg, 0.24 mmol, 1.2 eq.) run at  $-15\text{ }^{\circ}\text{C}$  for 5 days, the reaction mixture was purified by column

chromatography on silica gel (petroleum ether/EtOAc = 10/1 ~ 5/1) to yield the product **37** as a light yellow solid (69.1 mg, 93% yield, 94% e.e.).

**HPLC** analysis: Chiralcel OD-H (*n*-hexane/*i*-PrOH = 90/10, flow rate 1.0 mL/min,  $\lambda$  = 214 nm),  $t_R$  (major) = 10.60 min,  $t_R$  (minor) = 15.75 min.

**$^1\text{H}$  NMR** (400 MHz,  $\text{CDCl}_3$ )  $\delta$  8.62 (d,  $J$  = 2.3 Hz, 1H), 8.00 (d,  $J$  = 8.4 Hz, 1H), 7.80 (d,  $J$  = 2.3 Hz, 1H), 7.72 – 7.66 (m, 1H), 7.66 – 7.60 (m, 1H), 7.54 – 7.48 (m, 1H), 7.01 (s, 2H), 6.65 (s, 1H), 4.62 (dd,  $J$  = 8.6, 6.7 Hz, 1H), 2.15 – 2.06 (m, 1H), 2.03 – 1.93 (m, 7H), 0.96 (t,  $J$  = 7.3 Hz, 3H).

**$^{13}\text{C}$  NMR** (100 MHz,  $\text{CDCl}_3$ )  $\delta$  150.2, 147.3, 144.6, 138.8, 134.6, 134.6, 132.0, 129.7, 129.2, 127.6, 127.3, 126.9, 124.0, 55.1, 29.4, 20.8, 11.9.

**HRMS** (ESI)  $m/z$  calcd. for  $\text{C}_{20}\text{H}_{22}\text{NO}_2\text{S}_2$  [ $\text{M} + \text{H}$ ] $^+$  372.1086, found: 372.1079.

### (*R*)-*S*-(1-(Pyridin-3-yl)propyl) 3,5-dimethylbenzenesulfonothioate (**38**)

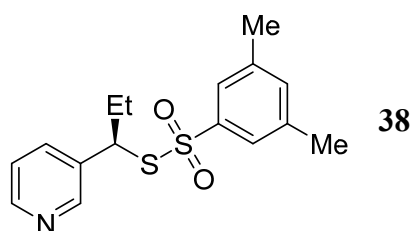

According to the **general procedure A** with 3-(1-bromopropyl)pyridine **E35** (40  $\mu\text{L}$ , 0.20 mmol, 1.0 eq.) and sodium 3,5-dimethylbenzenesulfonothioate **S5** (53.8 mg, 0.24 mmol, 1.2 eq.) run at  $-15\text{ }^\circ\text{C}$  for 5 days, the reaction mixture was purified by column chromatography on silica gel (petroleum ether/EtOAc = 60/1 ~ 20/1) to yield the product **38** as a light yellow solid (33.0 mg, 51% yield, 88% e.e.).

**HPLC** analysis: Chiralcel OD-H (*n*-hexane/*i*-PrOH = 90/10, flow rate 0.5 mL/min,  $\lambda$  = 230 nm),  $t_R$  (major) = 28.83 min,  $t_R$  (minor) = 32.66 min.

**$^1\text{H}$  NMR** (400 MHz,  $\text{CDCl}_3$ )  $\delta$  8.44 – 8.32 (m, 2H), 7.45 – 7.38 (m, 1H), 7.15 (s, 2H), 7.10 – 7.01 (m, 2H), 4.41 (t,  $J$  = 7.7 Hz, 1H), 2.26 (s, 6H), 2.05 – 1.98 (m, 1H), 1.93 – 1.81 (m, 1H), 0.91 (t,  $J$  = 7.3 Hz, 3H).

**$^{13}\text{C}$  NMR** (100 MHz,  $\text{CDCl}_3$ )  $\delta$  149.3, 148.9, 144.8, 139.1, 135.5, 135.1, 135.0, 124.2, 123.3, 54.8, 29.6, 21.2, 11.9.

**HRMS** (ESI)  $m/z$  calcd. for  $\text{C}_{16}\text{H}_{20}\text{NO}_2\text{S}_2$  [ $\text{M} + \text{H}$ ] $^+$  322.0930, found: 322.0923.

## 6. Enantioconvergent cross-coupling of propargyl electrophiles with sodium benzenethiosulfonate

### General procedure B: Substrate scope of propargyl halides and sodium benzenethiosulfonate (Table 3, 39–54)

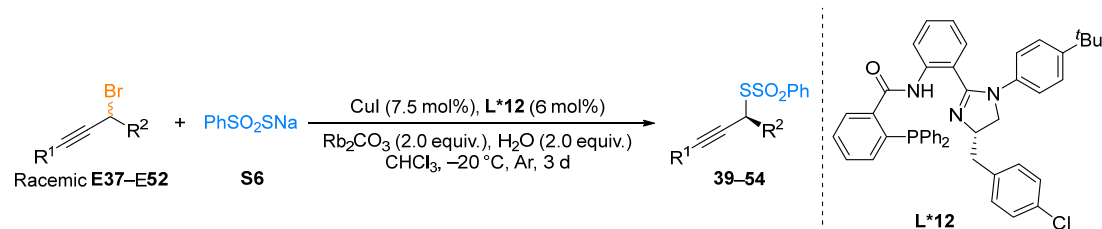

Under argon atmosphere, an oven-dried resealable Schlenk tube equipped with a magnetic stir bar was charged with sodium benzenethiosulfonate **S6** (47.2 mg, 0.24 mmol, 1.2 equiv.), CuI (2.86 mg, 0.015 mmol, 7.5 mol%), **L\*12** (8.47 mg, 0.012 mmol, 6 mol%) and  $\text{Rb}_2\text{CO}_3$  (92.8 mg, 0.40 mmol, 2.0 equiv.), Then, propargyl halide (0.20 mmol, 1.0 equiv.),  $\text{H}_2\text{O}$  (7.2  $\mu\text{L}$ , 0.40 mmol, 2.0 equiv.) and  $\text{CHCl}_3$  (2.0 mL) were sequentially added into the mixture and the reaction mixture was stirred at  $-20^\circ\text{C}$ . Upon completion (monitored by TLC), the precipitate was filtered off and washed by  $\text{CH}_2\text{Cl}_2$ . The filtrate was evaporated and the residue was purified by column chromatography on silica gel to afford the desired product.

The preparation of racemic products **39–43**, **45–51**:

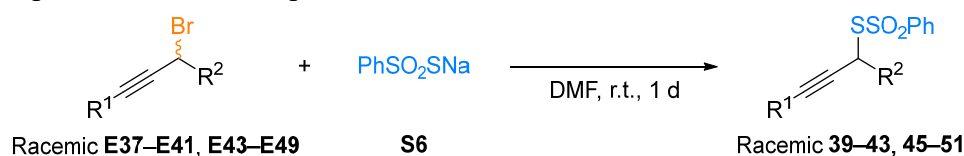

The mixture of sodium benzenethiosulfonate **S6** (23.6 mg, 0.12 mmol, 1.2 equiv.) and propargyl halide (0.10 mmol, 1.0 equiv.) in DMF (0.5 mL) was stirring for 1 d. Brine was added to the above reaction solution to quench the reaction. Then, the mixture was extracted with EtOAc (3x) and the combined organic layers were dried over  $\text{Na}_2\text{SO}_4$ , filtered and concentrated. The residue was purified by silica gel column chromatography to afford the desired racemates.

The preparation of racemic products ( $\pm$ )-**44**, **52–54**:

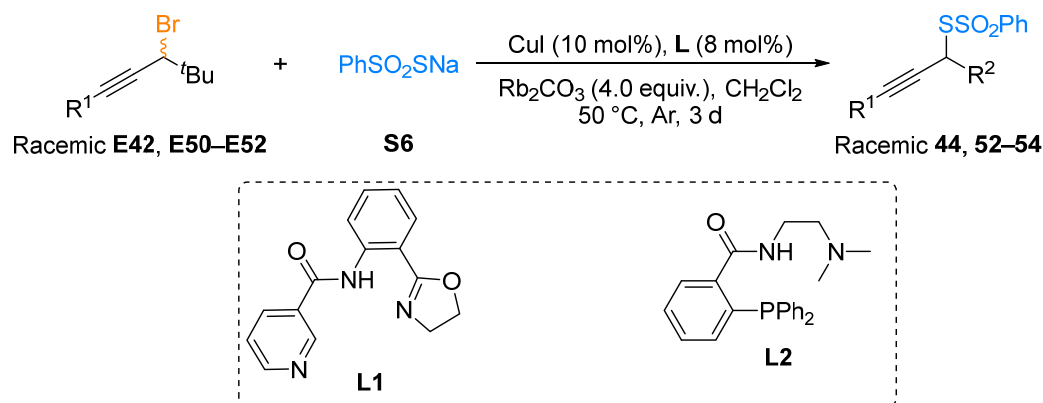

Under argon atmosphere, an oven-dried resealable Schlenk tube equipped with a magnetic stir bar was charged with sodium benzenethiosulfonate **S6** (47.2 mg, 0.24 mmol, 1.2 equiv.), CuI (3.81 mg, 0.02 mmol, 10 mol%), **L1** (4.28 mg, 0.016 mmol, 8 mol%), for synthesis of ( $\pm$ )-**44**, **53** or **L2** (6.02 mg, 0.016 mmol, 8 mol%), for synthesis of ( $\pm$ )-**52**, **54**, Rb<sub>2</sub>CO<sub>3</sub> (185.6 mg, 0.80 mmol, 4.0 equiv.), Then, propargyl halide (0.20 mmol, 1.0 equiv.) and CH<sub>2</sub>Cl<sub>2</sub> (2.0 mL) were sequentially added into the mixture and the reaction mixture was stirred at 50 °C for 3 days, the precipitate was filtered off and washed by CH<sub>2</sub>Cl<sub>2</sub>. The filtrate was evaporated and the residue was purified by column chromatography on silica gel to afford the desired product.

**(S)-S-(1-(Triisopropylsilyl)pent-1-yn-3-yl) benzenesulfonothioate (39)**

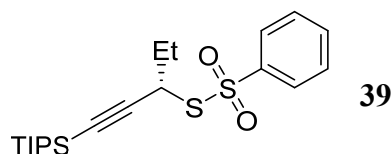

According to **General procedure B**, (3-bromopent-1-yn-1-yl)triisopropylsilane **E37** (59.2  $\mu$ L, 0.2 mmol, 1.0 eq.) with sodium benzenesulfonothioate **S6** (47.2 mg, 0.24 mmol, 1.2 eq.). The reaction mixture was purified by column chromatography on silica gel (petroleum ether/EtOAc = 100/1 ~ 50/1) to yield the product **39** as a colorless oil (71.4 mg, 90% yield, 90% e.e.).

**HPLC** analysis: Chiralcel OZ-3 (*n*-Hexane/*i*-PrOH = 99/1, flow rate 0.7 mL/min,  $\lambda$  = 214 nm),  $t_R$  (minor) = 11.27 min,  $t_R$  (major) = 13.58 min.

**<sup>1</sup>H NMR** (400 MHz, CDCl<sub>3</sub>)  $\delta$  7.99 – 7.93 (m, 2H), 7.64 – 7.59 (m, 1H), 7.56 – 7.51 (m, 2H), 4.17 (dd,  $J$  = 7.6, 5.2 Hz, 1H), 1.98 – 1.78 (m, 2H), 1.05 (d,  $J$  = 7.3 Hz, 3H), 1.01 – 0.95 (m, 21H).

**<sup>13</sup>C NMR** (100 MHz, CDCl<sub>3</sub>)  $\delta$  145.5, 133.7, 129.4, 127.0, 103.6, 87.9, 44.2, 29.6, 18.6, 11.1(5), 11.1(3).

**HRMS** (ESI)  $m/z$  calcd. for C<sub>20</sub>H<sub>33</sub>O<sub>2</sub>S<sub>2</sub>Si [M + H]<sup>+</sup> 397.1686, found: 397.1682.

**(S)-S-(4-(Triisopropylsilyl)but-3-yn-2-yl) benzenesulfonothioate (40)**

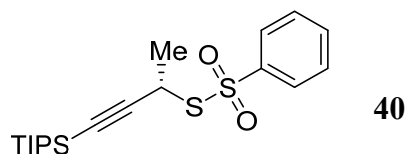

According to **General procedure B**, (3-bromobut-1-yn-1-yl)triisopropylsilane **E38** (56.0  $\mu$ L, 0.2 mmol, 1.0 eq.) with sodium benzenesulfonothioate **S6** (47.2 mg, 0.24 mmol, 1.2 eq.). The reaction mixture was purified by column chromatography on silica gel (petroleum ether/EtOAc = 100/1 ~ 50/1) to yield the product **40** as a light yellow oil (69.1 mg, 90% yield, 91% e.e.).

**HPLC** analysis: Chiralcel OZ-3 (*n*-Hexane/*i*-PrOH = 99/1, flow rate 0.7 mL/min,  $\lambda$  = 214 nm),  $t_R$  (minor) = 11.20 min,  $t_R$  (major) = 12.44 min.

**<sup>1</sup>H NMR** (400 MHz, CDCl<sub>3</sub>)  $\delta$  7.99 – 7.93 (m, 2H), 7.66 – 7.59 (m, 1H), 7.58 – 7.51 (m, 2H), 4.24 (q,  $J$  = 7.0 Hz, 1H), 1.62 (d,  $J$  = 7.0 Hz, 3H), 1.02 – 0.95 (m, 21H).

$^{13}\text{C}$  NMR (100 MHz,  $\text{CDCl}_3$ )  $\delta$  145.3, 133.8, 129.4, 127.0, 104.8, 87.2, 37.5, 23.4, 18.6, 11.1.

HRMS (ESI)  $m/z$  calcd. for  $\text{C}_{19}\text{H}_{30}\text{NaO}_2\text{S}_2\text{Si}$  [ $\text{M} + \text{Na}$ ] $^+$  405.1349, found: 405.1347.

**(S)-S-(1-(Triisopropylsilyl)hex-1-yn-3-yl) benzenesulfonothioate (41)**

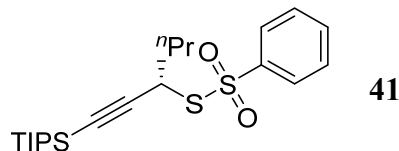

According to **General procedure B**, (3-bromohex-1-yn-1-yl)triisopropylsilane **E39** (63.0  $\mu\text{L}$ , 0.2 mmol, 1.0 eq.) with sodium benzenesulfonothioate **S6** (47.2 mg, 0.24 mmol, 1.2 eq.). The reaction mixture was purified by column chromatography on silica gel (petroleum ether/EtOAc = 100/1 ~ 50/1) to yield the product **41** as a colorless oil (69.7 mg, 85% yield, 90% e.e.).

HPLC analysis: Chiralcel OZ-3 (*n*-Hexane/*i*-PrOH = 99/1, flow rate 0.7 mL/min,  $\lambda$  = 214 nm),  $t_R$  (minor) = 10.08 min,  $t_R$  (major) = 11.91 min.

$^1\text{H}$  NMR (400 MHz,  $\text{CDCl}_3$ )  $\delta$  7.98 – 7.93 (m, 2H), 7.64 – 7.58 (m, 1H), 7.57 – 7.50 (m, 2H), 4.19 (dd,  $J$  = 7.9, 5.7 Hz, 1H), 1.86 – 1.73 (m, 2H), 1.58 – 1.46 (m, 2H), 1.01 – 0.93 (m, 21H), 0.90 (t,  $J$  = 7.4 Hz, 3H).

$^{13}\text{C}$  NMR (100 MHz,  $\text{CDCl}_3$ )  $\delta$  145.5, 133.7, 129.4, 127.0, 104.0, 87.6, 42.5, 38.2, 20.1, 18.6, 13.5, 11.1.

HRMS (ESI)  $m/z$  calcd. for  $\text{C}_{21}\text{H}_{35}\text{O}_2\text{S}_2\text{Si}$  [ $\text{M} + \text{H}$ ] $^+$  411.1842, found: 411.1839.

**(S)-S-(4-Methyl-1-(triisopropylsilyl)pent-1-yn-3-yl) benzenesulfonothioate (42)**

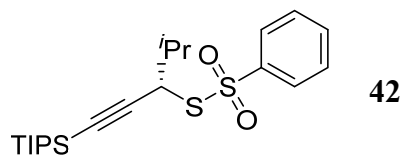

According to **General procedure B**, (3-bromo-4-methylpent-1-yn-1-yl)triisopropylsilane **E40** (100  $\mu\text{L}$ , 0.2 mmol, 1.0 eq.) with sodium benzenesulfonothioate **S6** (47.2 mg, 0.24 mmol, 1.2 eq.) run at 5 days. The reaction mixture was purified by column chromatography on silica gel (petroleum ether/EtOAc = 100/1 ~ 50/1) to yield the product **42** as a colorless oil (50.1 mg, 61% yield, 90% e.e.).

HPLC analysis: Chiralcel OZ-3 (*n*-Hexane/*i*-PrOH = 99/1, flow rate 0.7 mL/min,  $\lambda$  = 214 nm),  $t_R$  (minor) = 10.07 min,  $t_R$  (major) = 12.68 min.

$^1\text{H}$  NMR (400 MHz,  $\text{CDCl}_3$ )  $\delta$  7.98 – 7.93 (m, 2H), 7.64 – 7.58 (m, 1H), 7.57 – 7.51 (m, 2H), 4.13 (d,  $J$  = 4.3 Hz, 1H), 2.19 – 2.09 (m, 1H), 1.06 (d,  $J$  = 6.7 Hz, 3H), 1.01 (d,  $J$  = 6.6 Hz, 3H), 1.00 – 0.95 (m, 21H).

$^{13}\text{C}$  NMR (100 MHz,  $\text{CDCl}_3$ )  $\delta$  145.6, 133.7, 129.4, 127.0, 102.3, 88.5, 49.8, 33.8, 20.7, 18.7, 18.3, 11.2.

HRMS (ESI)  $m/z$  calcd. for  $\text{C}_{21}\text{H}_{35}\text{O}_2\text{S}_2\text{Si}$  [ $\text{M} + \text{H}$ ] $^+$  411.1842, found: 411.1839.

**(S)-S-(5-Methyl-1-(triisopropylsilyl)hex-1-yn-3-yl) benzenesulfonothioate (43)**

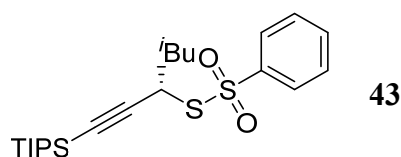

According to **General procedure B**, (3-bromo-5-methylhex-1-yn-1-yl)triisopropylsilane **E41** (63.0  $\mu$ L, 0.2 mmol, 1.0 eq.) with sodium benzenesulfonothioate **S6** (47.2 mg, 0.24 mmol, 1.2 eq.). The reaction mixture was purified by column chromatography on silica gel (petroleum ether/EtOAc = 100/1 ~ 50/1) to yield the product **43** as a colorless oil (80.7 mg, 95% yield, 90% e.e.).

**HPLC** analysis: Chiralcel OZ-3 (*n*-Hexane/*i*-PrOH = 99/1, flow rate 0.7 mL/min,  $\lambda$  = 214 nm),  $t_R$  (minor) = 8.70 min,  $t_R$  (major) = 11.39 min.

**$^1\text{H}$  NMR** (400 MHz,  $\text{CDCl}_3$ )  $\delta$  7.99 – 7.92 (m, 2H), 7.65 – 7.59 (m, 1H), 7.57 – 7.51 (m, 2H), 4.17 (dd,  $J$  = 9.5, 6.1 Hz, 1H), 1.95 – 1.83 (m, 1H), 1.78 – 1.69 (m, 1H), 1.68 – 1.59 (m, 1H), 1.02 – 0.94 (m, 21H), 0.91 (dd,  $J$  = 6.6, 4.1 Hz, 6H).

**$^{13}\text{C}$  NMR** (100 MHz,  $\text{CDCl}_3$ )  $\delta$  145.5, 133.7, 129.4, 127.1, 104.2, 87.5, 45.1, 41.1, 26.4, 22.8, 21.5, 18.6, 11.1.

**HRMS** (ESI)  $m/z$  calcd. for  $\text{C}_{22}\text{H}_{37}\text{O}_2\text{S}_2\text{Si}$  [ $\text{M} + \text{H}$ ] $^+$  425.1992, found: 425.1999.

**(S)-S-(4,4-Dimethyl-1-(triisopropylsilyl)pent-1-yn-3-yl) benzenesulfonothioate (44)**

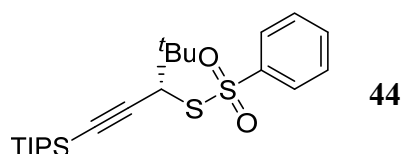

According to **General procedure B**, (3-bromo-4,4-dimethylpent-1-yn-1-yl)triisopropylsilane **E42** (65.0  $\mu$ L, 0.2 mmol, 1.0 eq.) with sodium benzenesulfonothioate **S6** (47.2 mg, 0.24 mmol, 1.2 eq.) run at 7 days. The reaction mixture was purified by column chromatography on silica gel (petroleum ether/EtOAc = 100/1 ~ 50/1) to yield the product **44** as a colorless oil (51.8 mg, 61% yield, 96% e.e.).

**HPLC** analysis: Chiralcel OZ-3 (*n*-Hexane/*i*-PrOH = 99/1, flow rate 0.7 mL/min,  $\lambda$  = 214 nm),  $t_R$  (minor) = 9.05 min,  $t_R$  (major) = 12.72 min.

**$^1\text{H}$  NMR** (400 MHz,  $\text{CDCl}_3$ )  $\delta$  7.99 – 7.92 (m, 2H), 7.63 – 7.56 (m, 1H), 7.56 – 7.48 (m, 2H), 3.91 (s, 1H), 1.09 (s, 9H), 0.98 – 0.93 (m, 21H).

**$^{13}\text{C}$  NMR** (100 MHz,  $\text{CDCl}_3$ )  $\delta$  145.7, 133.6, 129.3, 127.0, 104.1, 87.5, 55.2, 36.5, 27.5, 18.7, 11.2.

**HRMS** (ESI)  $m/z$  calcd. for  $\text{C}_{22}\text{H}_{36}\text{NaO}_2\text{S}_2\text{Si}$  [ $\text{M} + \text{Na}$ ] $^+$  447.1818, found: 447.1816.

**(S)-S-(5-Phenyl-1-(triisopropylsilyl)pent-1-yn-3-yl) benzenesulfonothioate (45)**

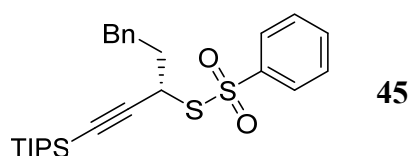

According to **General procedure B**, (3-bromo-5-phenylpent-1-yn-1-yl)triisopropylsilane **E43** (70.4  $\mu$ L, 0.2 mmol, 1.0 eq.) with sodium benzenesulfonothioate **S6** (47.2

mg, 0.24 mmol, 1.2 eq.). The reaction mixture was purified by column chromatography on silica gel (petroleum ether/EtOAc = 100/1 ~ 50/1) to yield the product **45** as a colorless oil (75.8 mg, 80% yield, 87% e.e.).

**HPLC analysis:** Chiralcel OZ-3 (*n*-Hexane/*i*-PrOH = 99/1, flow rate 0.7 mL/min,  $\lambda$  = 214 nm),  $t_R$  (major) = 28.24 min,  $t_R$  (minor) = 29.95 min.

**$^1\text{H NMR}$**  (400 MHz,  $\text{CDCl}_3$ )  $\delta$  7.88 – 7.80 (m, 2H), 7.60 (t,  $J$  = 7.4 Hz, 1H), 7.49 (t,  $J$  = 7.7 Hz, 2H), 7.33 – 7.26 (m, 2H), 7.24 – 7.19 (m, 1H), 7.16 – 7.08 (m, 2H), 4.11 (dd,  $J$  = 8.5, 5.0 Hz, 1H), 2.89 – 2.73 (m, 2H), 2.25 – 2.04 (m, 2H), 1.04 – 0.96 (m, 21H).

**$^{13}\text{C NMR}$**  (100 MHz,  $\text{CDCl}_3$ )  $\delta$  145.2, 140.2, 133.8, 129.4, 128.7 (two carbon overlapped), 127.0, 126.4, 103.3, 88.6, 41.8, 38.0, 33.0, 18.7, 11.2.

**HRMS** (ESI)  $m/z$  calcd. for  $\text{C}_{26}\text{H}_{36}\text{NaO}_2\text{S}_2\text{Si}$  [ $\text{M} + \text{Na}$ ] $^+$  495.1818, found: 495.1814.

#### (*S*)-*S*-(5-(5-Methylfuran-2-yl)-1-(triisopropylsilyl)pent-1-yn-3-yl) benzenesulfonothioate (**46**)

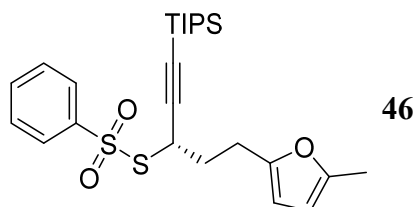

According to **General procedure B**, (3-bromo-5-(5-methylfuran-2-yl)pent-1-yn-1-yl)triisopropylsilane **E44** (71.0  $\mu\text{L}$ , 0.2 mmol, 1.0 eq.) with sodium benzenesulfonothioate **S6** (47.2 mg, 0.24 mmol, 1.2 eq.). The reaction mixture was purified by column chromatography on silica gel (petroleum ether/EtOAc = 100/1 ~ 50/1) to yield the product **46** as a brown oil (76.3 mg, 80% yield, 87% e.e.).

**HPLC analysis:** Chiralcel OZ-3 (*n*-Hexane/*i*-PrOH = 99/1, flow rate 0.7 mL/min,  $\lambda$  = 214 nm),  $t_R$  (minor) = 11.63 min,  $t_R$  (major) = 13.50 min.

**$^1\text{H NMR}$**  (400 MHz,  $\text{CDCl}_3$ )  $\delta$  7.94 – 7.87 (m, 2H), 7.65 – 7.55 (m, 1H), 7.56 – 7.48 (m, 2H), 5.89 – 5.82 (m, 2H), 4.18 (dd,  $J$  = 8.4, 5.3 Hz, 1H), 2.79 (t,  $J$  = 7.4 Hz, 2H), 2.25 (s, 3H), 2.25 – 2.13 (m, 1H), 2.15 – 2.01 (m, 1H), 1.05 – 0.93 (m, 21H).

**$^{13}\text{C NMR}$**  (100 MHz,  $\text{CDCl}_3$ )  $\delta$  151.7, 150.9, 145.3, 133.8, 129.4, 127.0, 106.7, 106.1, 103.2, 88.4, 41.7, 34.8, 25.4, 18.6, 13.6, 11.1.

**HRMS** (ESI)  $m/z$  calcd. for  $\text{C}_{25}\text{H}_{37}\text{O}_3\text{S}_2\text{Si}$  [ $\text{M} + \text{H}$ ] $^+$  477.1948, found: 477.1946.

#### Ethyl (*S*)-5-((phenylsulfonyl)thio)-7-(triisopropylsilyl)hept-6-ynoate (**47**)

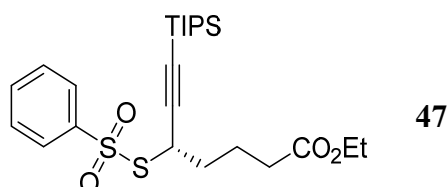

According to **General procedure B**, ethyl 5-bromo-7-(triisopropylsilyl)hept-6-ynoate **E45** (62.0  $\mu\text{L}$ , 0.2 mmol, 1.0 eq.) with sodium benzenesulfonothioate **S6** (47.2 mg, 0.24 mmol, 1.2 eq.). The reaction mixture was purified by column chromatography on silica gel (petroleum ether/EtOAc = 100/1 ~ 50/1) to yield the product **47** as a colorless oil

(82.6 mg, 86% yield, 87% e.e.).

**HPLC analysis:** Chiralcel OZ-3 (*n*-Hexane/*i*-PrOH = 99/1, flow rate 0.7 mL/min,  $\lambda$  = 214 nm),  $t_R$  (minor) = 45.86 min,  $t_R$  (major) = 53.00 min.

**$^1\text{H NMR}$**  (400 MHz,  $\text{CDCl}_3$ )  $\delta$  8.00 – 7.91 (m, 2H), 7.66 – 7.60 (m, 1H), 7.58 – 7.50 (m, 2H), 4.22 – 4.16 (m, 1H), 4.12 (q,  $J$  = 7.1 Hz, 2H), 2.33 – 2.26 (m, 2H), 2.00 – 1.89 (m, 1H), 1.89 – 1.79 (m, 3H), 1.25 (t,  $J$  = 7.1 Hz, 3H), 1.02 – 0.94 (m, 21H).

**$^{13}\text{C NMR}$**  (100 MHz,  $\text{CDCl}_3$ )  $\delta$  172.9, 145.4, 133.8, 129.4, 127.0, 103.3, 88.3, 60.5, 42.2, 35.4, 33.5, 22.2, 18.6, 14.3, 11.1.

**HRMS (ESI)**  $m/z$  calcd. for  $\text{C}_{24}\text{H}_{39}\text{O}_4\text{S}_2\text{Si}$  [ $\text{M} + \text{H}$ ] $^+$  483.2054, found: 483.2052.

#### (*S,S*)-(5-Cyano-1-(triisopropylsilyl)pent-1-yn-3-yl) benzenesulfonothioate (**48**)

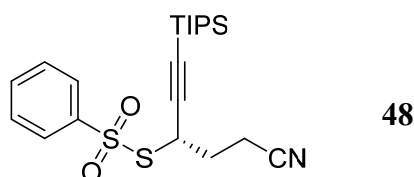

According to **General procedure B**, 4-bromo-6-(triisopropylsilyl)hex-5-yne nitrile **E46** (56.0  $\mu\text{L}$ , 0.2 mmol, 1.0 eq.) with sodium benzenesulfonothioate **S6** (47.2 mg, 0.24 mmol, 1.2 eq.). The reaction mixture was purified by column chromatography on silica gel (petroleum ether/EtOAc = 100/1 ~ 50/1) to yield the product **48** as a brown oil (68.3 mg, 81% yield, 85% e.e.).

**HPLC analysis:** Chiralcel ODH (*n*-Hexane/*i*-PrOH = 95/5, flow rate 0.6 mL/min,  $\lambda$  = 214 nm),  $t_R$  (major) = 18.86 min,  $t_R$  (minor) = 24.69 min.

**$^1\text{H NMR}$**  (400 MHz,  $\text{CDCl}_3$ )  $\delta$  7.99 – 7.94 (m, 2H), 7.70 – 7.64 (m, 1H), 7.62 – 7.56 (m, 2H), 4.24 (dd,  $J$  = 7.9, 5.3 Hz, 1H), 2.57 (t,  $J$  = 7.5 Hz, 2H), 2.36 – 2.26 (m, 1H), 2.24 – 2.14 (m, 1H), 1.01 – 0.96 (m, 21H).

**$^{13}\text{C NMR}$**  (100 MHz,  $\text{CDCl}_3$ )  $\delta$  144.7, 134.3, 129.7, 127.1, 118.3, 100.7, 90.7, 40.8, 31.9, 18.6, 14.7, 11.0.

**HRMS (ESI)**  $m/z$  calcd. for  $\text{C}_{21}\text{H}_{31}\text{NNaO}_2\text{S}_2\text{Si}$  [ $\text{M} + \text{Na}$ ] $^+$  444.1458, found: 444.1456.

#### (*S,S*)-(8-Chloro-1-(triisopropylsilyl)oct-1-yn-3-yl) benzenesulfonothioate (**49**)

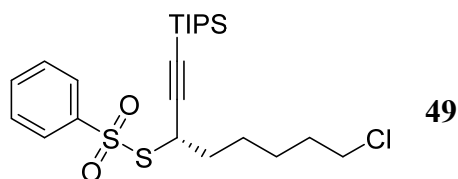

According to **General procedure B**, (3-bromo-8-chlorooct-1-yn-1-yl)triisopropylsilane **E47** (72.0  $\mu\text{L}$ , 0.2 mmol, 1.0 eq.) with sodium benzenesulfonothioate (47.2 mg, 0.24 mmol, 1.2 eq.). The reaction mixture was purified by column chromatography on silica gel (petroleum ether/EtOAc = 100/1 ~ 50/1) to yield the product **49** as a light yellow oil (81.5 mg, 86% yield, 84% e.e.).

**HPLC analysis:** Chiralcel OZ-3 (*n*-Hexane/*i*-PrOH = 99/1, flow rate 0.7 mL/min,  $\lambda$  = 214 nm),  $t_R$  (minor) = 16.36 min,  $t_R$  (major) = 17.85 min.



$^1\text{H NMR}$  (400 MHz,  $\text{CDCl}_3$ )  $\delta$  7.98 – 7.92 (m, 2H), 7.65 – 7.59 (m, 1H), 7.58 – 7.50 (m, 2H), 4.19 (dd,  $J = 7.9, 5.5$  Hz, 1H), 3.50 (t,  $J = 6.6$  Hz, 2H), 1.94 – 1.77 (m, 2H), 1.77 – 1.68 (m, 2H), 1.57 – 1.48 (m, 2H), 1.47 – 1.37 (m, 2H), 1.03 – 0.90 (m, 21H).

$^{13}\text{C NMR}$  (100 MHz,  $\text{CDCl}_3$ )  $\delta$  145.4, 133.8, 129.4, 127.0, 103.6, 88.0, 44.8, 42.5, 35.9, 32.3, 26.1, 25.9, 18.6, 11.1.

**HRMS** (ESI)  $m/z$  calcd. for  $\text{C}_{23}\text{H}_{37}\text{ClNaO}_2\text{S}_2\text{Si}$   $[\text{M} + \text{Na}]^+$  495.1585, found: 495.1582.

**(S)-S-(1-(Triisopropylsilyl)oct-7-en-1-yn-3-yl) benzenesulfonothioate (50)**

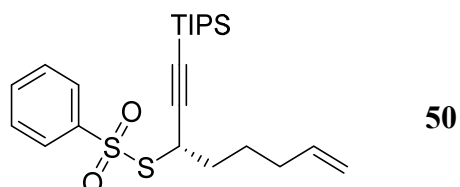

According to **General procedure B**, (3-bromooct-7-en-1-yn-1-yl)triisopropylsilane **E48** (68.5  $\mu\text{L}$ , 0.2 mmol, 1.0 eq.) with sodium benzenesulfonothioate **S6** (47.2 mg, 0.24 mmol, 1.2 eq.). The reaction mixture was purified by column chromatography on silica gel (petroleum ether/EtOAc = 100/1 ~ 50/1) to yield the product **50** as a colorless oil (69.9 mg, 80% yield, 86% e.e.).

**HPLC** analysis: Chiralcel OZ-3 (*n*-Hexane/*i*-PrOH = 99/1, flow rate 0.7 mL/min,  $\lambda = 214$  nm),  $t_R$  (major) = 20.46 min,  $t_R$  (minor) = 22.86 min.

$^1\text{H NMR}$  (400 MHz,  $\text{CDCl}_3$ )  $\delta$  7.98 – 7.92 (m, 2H), 7.65 – 7.59 (m, 1H), 7.57 – 7.50 (m, 2H), 5.78 – 5.66 (m, 1H), 5.02 – 4.92 (m, 2H), 4.20 (dd,  $J = 8.1, 5.3$  Hz, 1H), 2.10 – 1.98 (m, 2H), 1.93 – 1.74 (m, 2H), 1.64 – 1.56 (m, 2H), 1.02 – 0.93 (m, 21H).

$^{13}\text{C NMR}$  (100 MHz,  $\text{CDCl}_3$ )  $\delta$  145.5, 137.8, 133.8, 129.4, 127.0, 115.3, 103.7, 87.9, 42.6, 35.5, 32.9, 25.9, 18.6, 11.1.

**HRMS** (ESI)  $m/z$  calcd. for  $\text{C}_{23}\text{H}_{37}\text{O}_2\text{S}_2\text{Si}$   $[\text{M} + \text{H}]^+$  437.1999, found: 437.1997.

**(S,Z)-S-(1-(Triisopropylsilyl)undec-8-en-1-yn-3-yl) benzenesulfonothioate (51)**

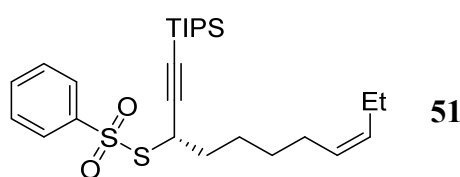

According to **General procedure B**, (3-bromooct-7-en-1-yn-1-yl)triisopropylsilane **E49** (78.0  $\mu\text{L}$ , 0.2 mmol, 1.0 eq.) with sodium benzenesulfonothioate **S6** (47.2 mg, 0.24 mmol, 1.2 eq.). The reaction mixture was purified by column chromatography on silica gel (petroleum ether/EtOAc = 100/1 ~ 50/1) to yield the product **51** as a colorless oil (78.0 mg, 81% yield, 85% e.e.).

**HPLC** analysis: Chiralcel OZ-3 (*n*-Hexane/*i*-PrOH = 99/1, flow rate 0.5 mL/min,  $\lambda = 214$  nm),  $t_R$  (minor) = 13.67 min,  $t_R$  (major) = 15.68 min.

$^1\text{H NMR}$  (400 MHz,  $\text{CDCl}_3$ )  $\delta$  7.99 – 7.92 (m, 2H), 7.64 – 7.58 (m, 1H), 7.57 – 7.49 (m, 2H), 5.40 – 5.32 (m, 1H), 5.31 – 5.22 (m, 1H), 4.19 (dd,  $J = 8.1, 5.4$  Hz, 1H), 2.07 – 1.94 (m, 4H), 1.89 – 1.74 (m, 2H), 1.57 – 1.45 (m, 2H), 1.38 – 1.24 (m, 2H), 1.02 – 0.92 (m, 24H).

$^{13}\text{C}$  NMR (100 MHz,  $\text{CDCl}_3$ )  $\delta$  145.5, 133.7, 132.2, 129.3, 128.6, 127.0, 103.8, 87.8, 42.6, 36.0, 29.0, 26.9, 26.4, 20.6, 18.6, 14.5, 11.1.

HRMS (ESI)  $m/z$  calcd. for  $\text{C}_{26}\text{H}_{42}\text{NaO}_2\text{S}_2\text{Si}$  [ $\text{M} + \text{Na}$ ] $^+$  501.2288, found: 501.2286.

**(S)-S-(4,4-Dimethyl-1-(trimethylsilyl)pent-1-yn-3-yl) benzenesulfonylthioate (52)**

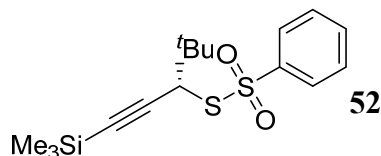

According to **General procedure B**, (3-bromo-4,4-dimethylpent-1-yn-1-yl)trimethylsilane **E50** (46.6  $\mu\text{L}$ , 0.2 mmol, 1.0 eq.) with sodium benzenesulfonylthioate **S6** (47.2 mg, 0.24 mmol, 1.2 eq.). The reaction mixture was purified by column chromatography on silica gel (petroleum ether/EtOAc = 100/1 ~ 50/1) to yield the product **52** as a white solid (54.5 mg, 80% yield, 95% e.e.).

HPLC analysis: Chiralcel OZ-3 (*n*-Hexane/*i*-PrOH = 99/1, flow rate 0.7 mL/min,  $\lambda$  = 230 nm),  $t_{\text{R}}$  (minor) = 12.05 min,  $t_{\text{R}}$  (major) = 15.37 min.

$^1\text{H}$  NMR (400 MHz,  $\text{CDCl}_3$ )  $\delta$  8.00 – 7.93 (m, 2H), 7.64 – 7.58 (m, 1H), 7.57 – 7.50 (m, 2H), 3.92 (s, 1H), 1.06 (s, 9H), 0.01 (s, 9H).

$^{13}\text{C}$  NMR (100 MHz,  $\text{CDCl}_3$ )  $\delta$  145.6, 133.6, 129.2, 127.3, 102.2, 91.1, 54.9, 36.3, 27.6, –0.1.

HRMS (ESI)  $m/z$  calcd. for  $\text{C}_{16}\text{H}_{25}\text{O}_2\text{S}_2\text{Si}$  [ $\text{M} + \text{H}$ ] $^+$  341.1056, found: 341.1060.

**(S)-S-(4,4-Dimethyl-1-(triethylsilyl)pent-1-yn-3-yl) benzenesulfonylthioate (53)**

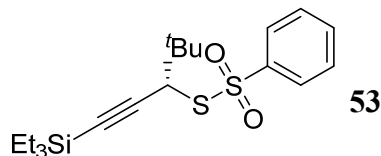

According to **General procedure B**, (3-bromo-4,4-dimethylpent-1-yn-1-yl)triethylsilane **E51** (55.5  $\mu\text{L}$ , 0.2 mmol, 1.0 eq.) with sodium benzenesulfonylthioate **S6** (47.2 mg, 0.24 mmol, 1.2 eq.). The reaction mixture was purified by column chromatography on silica gel (petroleum ether/EtOAc = 100/1 ~ 50/1) to yield the product **53** as a colorless oil (57.4 mg, 75% yield, 97% e.e.).

HPLC analysis: Chiralcel OZ-3 (*n*-Hexane/*i*-PrOH = 99/1, flow rate 0.7 mL/min,  $\lambda$  = 214 nm),  $t_{\text{R}}$  (minor) = 10.65 min,  $t_{\text{R}}$  (major) = 13.67 min.

$^1\text{H}$  NMR (400 MHz,  $\text{CDCl}_3$ )  $\delta$  7.99 – 7.94 (m, 2H), 7.64 – 7.58 (m, 1H), 7.57 – 7.49 (m, 2H), 3.92 (s, 1H), 1.08 (s, 9H), 0.87 (t,  $J$  = 7.9 Hz, 9H), 0.46 (q,  $J$  = 7.9 Hz, 6H).

$^{13}\text{C}$  NMR (100 MHz,  $\text{CDCl}_3$ )  $\delta$  145.7, 133.6, 129.2, 127.1, 103.5, 88.6, 55.1, 36.4, 27.5, 7.6, 4.4.

HRMS (ESI)  $m/z$  calcd. for  $\text{C}_{19}\text{H}_{31}\text{O}_2\text{S}_2\text{Si}$  [ $\text{M} + \text{H}$ ] $^+$  383.1523, found: 383.1529.

**(S)-S-(4,4-Dimethyl-1-phenylpent-1-yn-3-yl) benzenesulfonothioate (54)**

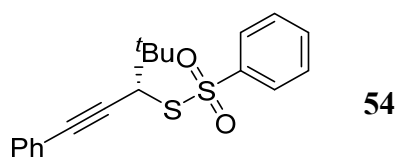

According to **General procedure B**, (3-bromo-4,4-dimethylpent-1-yn-1-yl)benzene **E52** (42.5  $\mu$ L, 0.2 mmol, 1.0 eq.) with sodium benzenesulfonothioate **S6** (47.2 mg, 0.24 mmol, 1.2 eq.). The reaction mixture was purified by column chromatography on silica gel (petroleum ether/EtOAc = 100/1 ~ 50/1) to yield the product **54** as a white solid (63.4 mg, 92% yield, 95% e.e.).

**HPLC** analysis: Chiralcel OZ-3 (*n*-Hexane/*i*-PrOH = 99/1, flow rate 0.7 mL/min,  $\lambda$  = 230 nm),  $t_R$  (minor) = 25.71 min,  $t_R$  (major) = 34.43 min.

**$^1\text{H}$  NMR** (400 MHz,  $\text{CDCl}_3$ )  $\delta$  8.02 – 7.95 (m, 2H), 7.52 – 7.39 (m, 3H), 7.33 – 7.19 (m, 3H), 7.16 – 7.08 (m, 2H), 4.18 (s, 1H), 1.13 (s, 9H).

**$^{13}\text{C}$  NMR** (100 MHz,  $\text{CDCl}_3$ )  $\delta$  145.4, 133.5, 131.6, 129.1, 128.5, 128.2, 127.3, 122.5, 86.5, 86.1, 55.0, 36.7, 27.7.

**HRMS** (ESI)  $m/z$  calcd. for  $\text{C}_{19}\text{H}_{21}\text{O}_2\text{S}_2\text{Si}$   $[\text{M} + \text{H}]^+$  345.0972, found: 345.0978.

## 7. Enantioconvergent cross-coupling of tertiary alkyl electrophiles with thiobenzoic acid or potassium thiocarboxylates.

### General procedure C: Substrate scope of tertiary alkyl electrophiles and thiobenzoic acid (Table, 55–79)

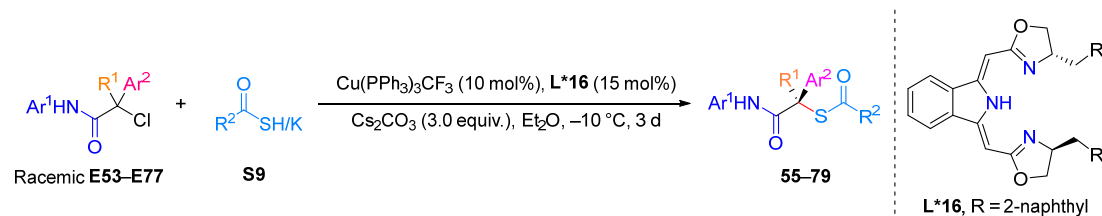

Under argon atmosphere, an oven-dried resealable Schlenk tube equipped with a magnetic stir bar was charged with tertiary alkyl electrophiles (0.10 mmol, 1.0 equiv.),  $\text{Cu(PPh}_3)_3\text{CF}_3$  (9.24 mg, 0.010 mmol, 10 mol%), **L\*16** (8.44 mg, 0.015 mmol, 15 mol%) and  $\text{Cs}_2\text{CO}_3$  (97.6 mg, 0.30 mmol, 3.0 equiv.). Then, thiobenzoic acid **S9** (17.6  $\mu\text{L}$ , 0.15 mmol, 1.5 equiv.) and  $\text{Et}_2\text{O}$  (2.0 mL) were sequentially added into the mixture and the reaction mixture was stirred at  $-10^\circ\text{C}$  for 3 days. The precipitate was filtered off and washed by  $\text{CH}_2\text{Cl}_2$ . The filtrate was evaporated and the residue was purified by column chromatography on silica gel to afford the desired product.

### General procedure D: Substrate scope of ( $\pm$ )-**E60** and potassium thiocarboxylates. (Table, 80–88)

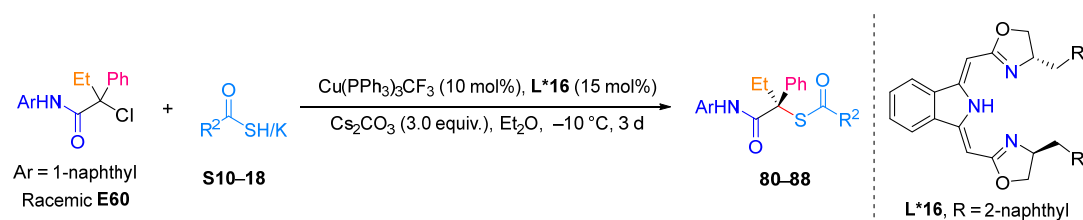

Under argon atmosphere, an oven-dried resealable Schlenk tube equipped with a magnetic stir bar was charged with tertiary alkyl electrophiles **E60** (32.4 mg, 0.10 mmol, 1.0 equiv.),  $\text{Cu(PPh}_3)_3\text{CF}_3$  (9.24 mg, 0.010 mmol, 10 mol%), **L\*16** (8.44 mg, 0.015 mmol, 15 mol%), potassium thiocarboxylates (0.15 mmol, 1.5 equiv.) and  $\text{Cs}_2\text{CO}_3$  (97.6 mg, 0.30 mmol, 3.0 equiv.). Then,  $\text{Et}_2\text{O}$  (2.0 mL) were sequentially added into the mixture and the reaction mixture was stirred at  $-10^\circ\text{C}$  for 3 days. The precipitate was filtered off and washed by  $\text{CH}_2\text{Cl}_2$ . The filtrate was evaporated and the residue was purified by column chromatography on silica gel to afford the desired product.

The preparation of racemic products **55–88**:

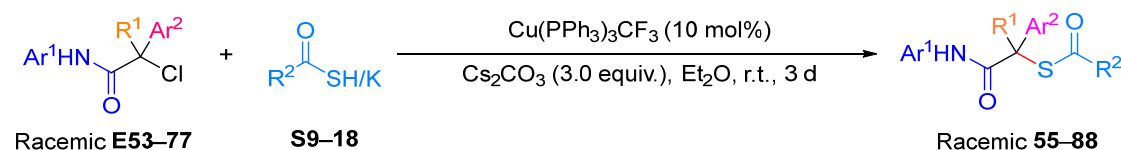

Under argon atmosphere, an oven-dried resealable Schlenk tube equipped with a magnetic stir bar was charged with tertiary alkyl electrophiles (0.10 mmol, 1.0 equiv.),

Cu(PPh<sub>3</sub>)<sub>3</sub>CF<sub>3</sub> (9.24 mg, 0.010 mmol, 10 mol%), Cs<sub>2</sub>CO<sub>3</sub> (97.6 mg, 0.30 mmol, 3.0 equiv.). Then, thiobenzoic acid or potassium thiocarboxylates (0.15 mmol, 1.5 equiv.) and Et<sub>2</sub>O (2.0 mL) were sequentially added into the mixture and the reaction mixture was stirred at r.t. for 3 days. The precipitate was filtered off and washed by CH<sub>2</sub>Cl<sub>2</sub>. The filtrate was evaporated and the residue was purified by column chromatography on silica gel to afford the desired product.

**(R)-S-(1-Oxo-2-phenyl-1-(phenylamino)butan-2-yl) benzothioate (55)**

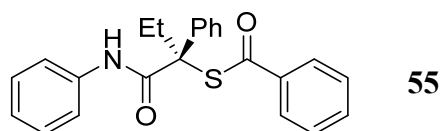

According to **General procedure C**, 2-chloro-*N*,2-diphenylbutanamide **E53** (27.4 mg, 0.1 mmol, 1.0 eq.) with thiobenzoic acid **S9** (17.7 μL, 0.15 mmol, 1.5 eq.). The reaction mixture was purified by column chromatography on silica gel (petroleum ether/EtOAc = 60/1 ~ 10/1) to yield the product **55** as a white solid (34.9 mg, 93% yield, 90% e.e.). **HPLC** analysis: Chiralcel AD-3 (*n*-Hexane/*i*-PrOH = 85/15, flow rate 0.8 mL/min, λ = 254 nm), *t<sub>R</sub>* (minor) = 16.11 min, *t<sub>R</sub>* (major) = 20.49 min.

**<sup>1</sup>H NMR** (400 MHz, CDCl<sub>3</sub>) δ 8.97 (s, 1H), 8.03 – 7.94 (m, 2H), 7.64 – 7.56 (m, 1H), 7.54 – 7.48 (m, 4H), 7.48 – 7.42 (m, 2H), 7.39 – 7.31 (m, 3H), 7.30 – 7.24 (m, 2H), 7.10 – 7.04 (m, 1H), 2.54 – 2.43 (m, 1H), 2.37 – 2.26 (m, 1H), 0.88 (t, *J* = 7.3 Hz, 3H).

**<sup>13</sup>C NMR** (100 MHz, CDCl<sub>3</sub>) δ 192.3, 169.9, 138.4, 138.1, 136.9, 134.2, 129.0, 128.9, 128.6, 128.0, 127.7, 127.4, 124.2, 120.0, 66.0, 32.5, 9.4.

**HRMS** (ESI) *m/z* calcd. for C<sub>23</sub>H<sub>22</sub>NO<sub>2</sub>S [M + H]<sup>+</sup> 376.1366, found: 376.1362.

**S-(1-Oxo-2-phenyl-1-(phenylamino)butan-2-yl) benzenesulfonothioate (55a)**

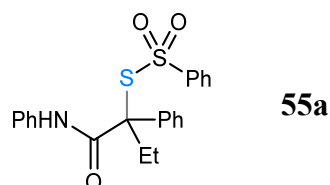

**<sup>1</sup>H NMR** (400 MHz, CDCl<sub>3</sub>) δ 7.46 – 7.35 (m, 4H), 7.34 – 7.18 (m, 8H), 7.18 – 7.06 (m, 4H), 2.92 – 2.78 (m, 1H), 2.55 – 2.40 (m, 1H), 1.08 (t, *J* = 7.2 Hz, 3H).

**<sup>13</sup>C NMR** (100 MHz, CDCl<sub>3</sub>) δ 168.7, 145.0, 137.1, 136.9, 133.0, 129.0, 128.9, 128.7, 128.7, 128.1, 126.7, 125.0, 120.1, 72.5, 30.8, 9.5.

**HRMS** (ESI) *m/z* calcd. for C<sub>22</sub>H<sub>22</sub>NO<sub>3</sub>S<sub>2</sub> [M + H]<sup>+</sup> 412.1036, found: 412.1039.

***N*,2-Diphenylbut-2-enamide (55b)**

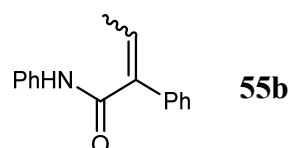

**<sup>1</sup>H NMR** (400 MHz, CDCl<sub>3</sub>) δ 7.58 (s, 1H), 7.54 (d, *J* = 8.0 Hz, 2H), 7.40 – 7.34 (m, 2H), 7.34 – 7.24 (m, 5H), 7.09 (t, *J* = 7.4 Hz, 1H), 6.15 (q, *J* = 7.2 Hz, 1H), 2.00 (d, *J*

= 7.2 Hz, 3H).

$^{13}\text{C}$  NMR (100 MHz,  $\text{CDCl}_3$ )  $\delta$  167.2, 139.0, 137.9, 137.3, 130.0, 129.0, 128.8, 127.9, 126.7, 124.5, 112.0, 15.8.

HRMS (ESI)  $m/z$  calcd. for  $\text{C}_{16}\text{H}_{16}\text{NO}$   $[\text{M} + \text{H}]^+$  238.1226, found: 238.1222

### 2,2'-Disulfanediylbis(*N*,2-diphenylbutanamide) (**55c**)

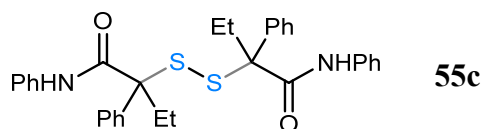

$^1\text{H}$  NMR (400 MHz,  $\text{CDCl}_3$ )  $\delta$  7.75 (s, 1H), 7.66 (s, 1H), 7.53 – 7.46 (m, 4H), 7.43 – 7.26 (m, 14H), 7.11 (q,  $J = 7.1$  Hz, 2H), 2.38 – 2.25 (m, 2H), 2.22 – 2.08 (m, 2H), 0.84 (t,  $J = 7.2$  Hz, 3H), 0.78 (t,  $J = 7.2$  Hz, 3H).

$^{13}\text{C}$  NMR (100 MHz,  $\text{CDCl}_3$ )  $\delta$  170.4, 170.2, 139.0, 138.9, 137.7(5), 137.7(3), 129.1(0), 129.0(5), 128.8, 128.7, 128.4, 128.30, 128.2(5), 128.1(6), 124.6(3), 124.5(7), 120.0(3), 119.9(8), 68.5, 68.1, 31.1, 30.9, 9.9, 9.8.

HRMS (ESI)  $m/z$  calcd. for  $\text{C}_{32}\text{H}_{33}\text{N}_2\text{O}_2\text{S}_2$   $[\text{M} + \text{H}]^+$  541.1978, found: 541.1992.

### (*R*)-*S*-(1-((4-(*Tert*-butyl)phenyl)amino)-1-oxo-2-phenylbutan-2-yl) benzothioate (**56**)

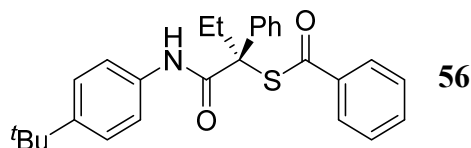

According to **General procedure C**, *N*-(4-(*tert*-butyl)phenyl)-2-chloro-2-phenylbutanamide **E54** (33.0 mg, 0.10 mmol, 1.0 eq.) with thiobenzoic acid **S9** (17.7  $\mu\text{L}$ , 0.15 mmol, 1.5 eq.). The reaction mixture was purified by column chromatography on silica gel (petroleum ether/EtOAc = 60/1 ~ 10/1) to yield the product **56** as a white solid (41.0 mg, 95% yield, 87% e.e.).

HPLC analysis: Chiralcel OZ-3 (*n*-Hexane/*i*-PrOH = 98/2, flow rate 0.3 mL/min,  $\lambda = 254$  nm),  $t_R$  (major) = 24.83 min,  $t_R$  (minor) = 29.95 min.

$^1\text{H}$  NMR (400 MHz,  $\text{CDCl}_3$ )  $\delta$  8.89 (s, 1H), 8.02 – 7.93 (m, 2H), 7.63 – 7.55 (m, 1H), 7.52 – 7.48 (m, 2H), 7.47 – 7.41 (m, 4H), 7.38 – 7.27 (m, 5H), 2.54 – 2.44 (m, 1H), 2.37 – 2.26 (m, 1H), 1.28 (s, 9H), 0.88 (t,  $J = 7.3$  Hz, 3H).

$^{13}\text{C}$  NMR (100 MHz,  $\text{CDCl}_3$ )  $\delta$  192.2, 169.8, 147.2, 138.2, 136.9, 135.8, 134.1, 128.9, 128.6, 127.9, 127.6, 127.5, 125.8, 119.6, 66.0, 34.5, 32.5, 31.5, 9.4.

HRMS (ESI)  $m/z$  calcd. for  $\text{C}_{27}\text{H}_{30}\text{NO}_2\text{S}$   $[\text{M} + \text{H}]^+$  432.1992, found: 432.1989.

### (*R*)-*S*-(1-([1,1'-Biphenyl]-4-ylamino)-1-oxo-2-phenylbutan-2-yl) benzothioate (**57**)

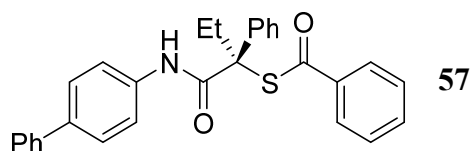

According to **General procedure C**, *N*-([1,1'-biphenyl]-4-yl)-2-chloro-2-phenylbutanamide **E55** (35.0 mg, 0.10 mmol, 1.0 eq.) with thiobenzoic acid **S9** (17.7  $\mu$ L, 0.15 mmol, 1.5 eq.). The reaction mixture was purified by column chromatography on silica gel (petroleum ether/EtOAc = 60/1 ~ 10/1) to yield the product **57** as a colorless oil (42.5 mg, 94% yield, 89% e.e.).

**HPLC** analysis: Chiralcel OD-3 (*n*-Hexane/*i*-PrOH = 90/1, flow rate 0.5 mL/min,  $\lambda$  = 254 nm),  $t_R$  (minor) = 17.66 min,  $t_R$  (major) = 20.18 min.

**$^1\text{H}$  NMR** (400 MHz,  $\text{CDCl}_3$ )  $\delta$  9.06 (s, 1H), 8.06 – 7.96 (m, 2H), 7.64 – 7.57 (m, 3H), 7.56 – 7.49 (m, 6H), 7.49 – 7.43 (m, 2H), 7.43 – 7.35 (m, 4H), 7.35 – 7.27 (m, 2H), 2.55 – 2.44 (m, 1H), 2.38 – 2.27 (m, 1H), 0.89 (t,  $J$  = 7.3 Hz, 3H).

**$^{13}\text{C}$  NMR** (100 MHz,  $\text{CDCl}_3$ )  $\delta$  192.5, 170.0, 140.8, 138.1, 137.7, 137.1, 136.9, 134.2, 128.9(2), 128.8(7), 128.6, 128.0, 127.7 (two carbon overlapped), 127.4, 127.1, 127.0, 120.2, 66.1, 32.6, 9.4.

**HRMS** (ESI)  $m/z$  calcd. for  $\text{C}_{29}\text{H}_{26}\text{NO}_2\text{S}$  [ $\text{M} + \text{H}$ ] $^+$  452.1679, found: 452.1674.

**(*R*)-*S*-(1-((4-Bromophenyl)amino)-1-oxo-2-phenylbutan-2-yl) benzothioate (**58**)**

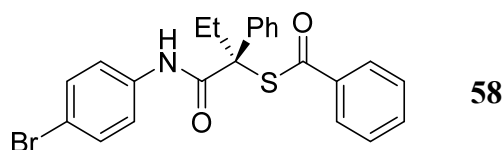

According to **General procedure C**, *N*-(4-bromophenyl)-2-chloro-2-phenylbutanamide **E56** (35.3 mg, 0.10 mmol, 1.0 eq.) with thiobenzoic acid **S9** (17.7  $\mu$ L, 0.15 mmol, 1.5 eq.). The reaction mixture was purified by column chromatography on silica gel (petroleum ether/EtOAc = 60/1 ~ 10/1) to yield the product **58** as a light yellow solid (41.8 mg, 92% yield, 84% e.e.).

**HPLC** analysis: Chiralcel OD-3 (*n*-Hexane/*i*-PrOH = 95/5, flow rate 0.4 mL/min,  $\lambda$  = 254 nm),  $t_R$  (minor) = 19.06 min,  $t_R$  (major) = 27.43 min.

**$^1\text{H}$  NMR** (400 MHz,  $\text{CDCl}_3$ )  $\delta$  9.08 (s, 1H), 8.04 – 7.93 (m, 2H), 7.64 – 7.56 (m, 1H), 7.49 – 7.43 (m, 4H), 7.43 – 7.37 (m, 4H), 7.37 – 7.29 (m, 3H), 2.51 – 2.38 (m, 1H), 2.35 – 2.23 (m, 1H), 0.86 (t,  $J$  = 7.3 Hz, 3H).

**$^{13}\text{C}$  NMR** (100 MHz,  $\text{CDCl}_3$ )  $\delta$  192.6, 170.0, 137.8, 137.5, 136.7, 134.3, 132.0, 128.9, 128.6, 128.0, 127.7, 127.3, 121.5, 116.7, 65.9, 32.6, 9.4.

**HRMS** (ESI)  $m/z$  calcd. for  $\text{C}_{23}\text{H}_{21}\text{BrNO}_2\text{S}$  [ $\text{M} + \text{H}$ ] $^+$  454.0471, found: 454.0466.

**(*R*)-*S*-(1-((3-Fluorophenyl)amino)-1-oxo-2-phenylbutan-2-yl) benzothioate (**59**)**

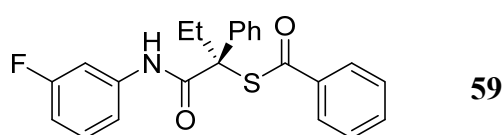

According to **General procedure C**, 2-chloro-*N*-(3-fluorophenyl)-2-

phenylbutanamide **E57** (29.2 mg, 0.10 mmol, 1.0 eq.) with thiobenzoic acid **S9** (17.7  $\mu$ L, 0.15 mmol, 1.5 eq.). The reaction mixture was purified by column chromatography on silica gel (petroleum ether/EtOAc = 60/1 ~ 10/1) to yield the product **59** as a light yellow solid (38.2 mg, 97% yield, 87% e.e.).

**HPLC** analysis: Chiralcel OD-3 (*n*-Hexane/*i*-PrOH = 95/5, flow rate 0.4 mL/min,  $\lambda$  = 254 nm),  $t_R$  (minor) = 15.77 min,  $t_R$  (major) = 18.69 min.

**$^1\text{H}$  NMR** (400 MHz,  $\text{CDCl}_3$ )  $\delta$  9.16 (s, 1H), 8.00 (d,  $J$  = 7.7 Hz, 2H), 7.64 – 7.58 (m, 1H), 7.56 – 7.50 (m, 1H), 7.50 – 7.43 (m, 4H), 7.40 – 7.29 (m, 3H), 7.24 – 7.16 (m, 1H), 7.14 – 7.07 (m, 1H), 6.79 – 6.72 (m, 1H), 2.52 – 2.39 (m, 1H), 2.36 – 2.22 (m, 1H), 0.87 (t,  $J$  = 7.3 Hz, 3H).

**$^{13}\text{C}$  NMR** (100 MHz,  $\text{CDCl}_3$ )  $\delta$  192.6, 170.1, 163.1 (d,  $J$  = 244.6 Hz), 139.9 (d,  $J$  = 10.9 Hz), 137.7, 136.7, 134.3, 130.0 (d,  $J$  = 9.4 Hz), 128.9, 128.7, 128.0, 127.7, 127.3, 115.2 (d,  $J$  = 3.0 Hz), 110.9 (d,  $J$  = 21.3 Hz), 107.4 (d,  $J$  = 26.3 Hz), 65.9, 32.6, 9.4.

**$^{19}\text{F}$  NMR** (376 MHz,  $\text{CDCl}_3$ )  $\delta$  -111.58.

**HRMS** (ESI)  $m/z$  calcd. for  $\text{C}_{23}\text{H}_{21}\text{FNO}_2\text{S}$  [ $\text{M} + \text{H}$ ] $^+$  394.1272, found: 394.1267.

**(*R*)-*S*-(1-((3,5-Dimethylphenyl)amino)-1-oxo-2-phenylbutan-2-yl) benzothioate (60)**

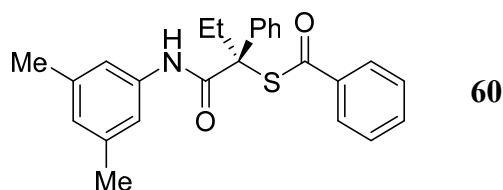

According to **General procedure C**, 2-chloro-*N*-(3,5-dimethylphenyl)-2-phenylbutanamide **E58** (30.2 mg, 0.10 mmol, 1.0 eq.) with thiobenzoic acid **S9** (17.7  $\mu$ L, 0.15 mmol, 1.5 eq.). The reaction mixture was purified by column chromatography on silica gel (petroleum ether/EtOAc = 60/1 ~ 10/1) to yield the product **60** as a colorless oil (36.3 mg, 90% yield, 86% e.e.).

**HPLC** analysis: Chiralcel AS-3 (*n*-Hexane/*i*-PrOH = 95/5, flow rate 0.4 mL/min,  $\lambda$  = 254 nm),  $t_R$  (minor) = 12.85 min,  $t_R$  (major) = 15.71 min.

**$^1\text{H}$  NMR** (400 MHz,  $\text{CDCl}_3$ )  $\delta$  8.82 (s, 1H), 8.03 – 7.94 (m, 2H), 7.63 – 7.56 (m, 1H), 7.52 – 7.42 (m, 4H), 7.39 – 7.28 (m, 3H), 7.16 (s, 2H), 6.72 (s, 1H), 2.54 – 2.44 (m, 1H), 2.37 – 2.28 (m, 1H), 2.26 (s, 6H), 0.88 (t,  $J$  = 7.3 Hz, 3H).

**$^{13}\text{C}$  NMR** (100 MHz,  $\text{CDCl}_3$ )  $\delta$  192.2, 169.9, 138.8, 138.2(2), 138.1(9), 136.9, 134.1, 128.9, 128.6, 127.9, 127.7, 127.4, 125.9, 117.6, 66.0, 32.5, 21.5, 9.5.

**HRMS** (ESI)  $m/z$  calcd. for  $\text{C}_{25}\text{H}_{26}\text{NO}_2\text{S}$  [ $\text{M} + \text{H}$ ] $^+$  404.1679, found: 404.1673.



**(R)-S-(1-((3,5-Dimethoxyphenyl)amino)-1-oxo-2-phenylbutan-2-yl) benzothioate (61)**

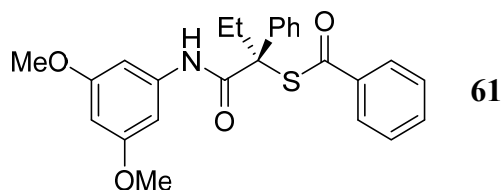

According to **General procedure C**, 2-chloro-*N*-(3,5-dimethoxyphenyl)-2-phenylbutanamide **E59** (33.4 mg, 0.10 mmol, 1.0 eq.) with thiobenzoic acid **S9** (17.7  $\mu$ L, 0.15 mmol, 1.5 eq.). The reaction mixture was purified by column chromatography on silica gel (petroleum ether/EtOAc = 60/1 ~ 10/1) to yield the product **61** as a yellow oil (41.4 mg, 95% yield, 90% e.e.).

**HPLC** analysis: Chiralcel AD-3 (*n*-Hexane/*i*-PrOH = 90/10, flow rate 0.5 mL/min,  $\lambda$  = 254 nm),  $t_R$  (major) = 28.53 min,  $t_R$  (minor) = 32.83 min.

**$^1\text{H}$  NMR** (400 MHz,  $\text{CDCl}_3$ )  $\delta$  8.97 (s, 1H), 8.02 – 7.94 (m, 2H), 7.65 – 7.56 (m, 1H), 7.51 – 7.40 (m, 4H), 7.40 – 7.28 (m, 3H), 6.78 (d,  $J$  = 2.3 Hz, 2H), 6.21 (t,  $J$  = 2.3 Hz, 1H), 3.76 (s, 6H), 2.53 – 2.41 (m, 1H), 2.36 – 2.23 (m, 1H), 0.87 (t,  $J$  = 7.3 Hz, 3H).

**$^{13}\text{C}$  NMR** (100 MHz,  $\text{CDCl}_3$ )  $\delta$  192.4, 170.0, 161.1, 140.1, 137.9, 136.8, 134.2, 128.9, 128.6, 128.0, 127.7, 127.4, 97.9, 97.0, 66.1, 55.5, 32.5, 9.4.

**HRMS** (ESI)  $m/z$  calcd. for  $\text{C}_{25}\text{H}_{26}\text{NO}_4\text{S}$   $[\text{M} + \text{H}]^+$  436.1577, found: 436.1572.

**(R)-S-(1-(Naphthalen-1-ylamino)-1-oxo-2-phenylbutan-2-yl) benzothioate (62)**

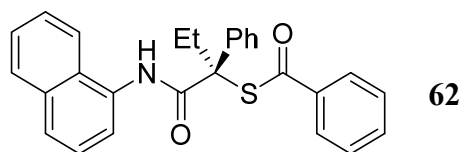

According to **General procedure C**, 2-chloro-*N*-(naphthalen-1-yl)-2-phenylbutanamide **E60** (32.4 mg, 0.10 mmol, 1.0 eq.) with thiobenzoic acid **S9** (17.7  $\mu$ L, 0.15 mmol, 1.5 eq.). The reaction mixture was purified by column chromatography on silica gel (petroleum ether/EtOAc = 60/1 ~ 10/1) to yield the product **62** as a light yellow oil (40.5 mg, 95% yield, 95% e.e.).

**HPLC** analysis: Chiralcel AD-3 (*n*-Hexane/*i*-PrOH = 90/10, flow rate 0.5 mL/min,  $\lambda$  = 254 nm),  $t_R$  (minor) = 28.39 min,  $t_R$  (major) = 32.45 min.

**$^1\text{H}$  NMR** (400 MHz,  $\text{CDCl}_3$ )  $\delta$  9.20 (s, 1H), 8.29 (s, 1H), 8.03 – 7.96 (m, 2H), 7.77 (d,  $J$  = 8.2 Hz, 1H), 7.72 (d,  $J$  = 8.6 Hz, 2H), 7.58 (t,  $J$  = 7.4 Hz, 1H), 7.55 – 7.50 (m, 2H), 7.47 – 7.39 (m, 4H), 7.39 – 7.28 (m, 4H), 2.58 – 2.46 (m, 1H), 2.41 – 2.29 (m, 1H), 0.91 (t,  $J$  = 7.3 Hz, 3H).

**$^{13}\text{C}$  NMR** (100 MHz,  $\text{CDCl}_3$ )  $\delta$  192.5, 170.2, 138.1, 136.8, 135.8, 134.2, 134.0, 130.6, 128.9, 128.7, 128.6, 128.0, 127.8, 127.7, 127.6, 127.4, 126.5, 125.0, 120.0, 116.5, 66.0, 32.6, 9.5.

**HRMS** (ESI)  $m/z$  calcd. for  $\text{C}_{27}\text{H}_{24}\text{NO}_2\text{S}$   $[\text{M} + \text{H}]^+$  426.1522, found: 426.1518.

**(R)-S-(1-(Naphthalen-1-ylamino)-1-oxo-2-phenylpropan-2-yl) benzothioate (63)**

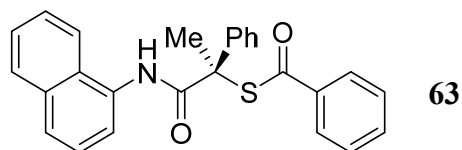

According to **General procedure C**, 2-chloro-*N*-(naphthalen-1-yl)-2-phenylpropanamide **E61** (31.0 mg, 0.10 mmol, 1.0 eq.) with thiobenzoic acid **S9** (17.7  $\mu$ L, 0.15 mmol, 1.5 eq.). The reaction mixture was purified by column chromatography on silica gel (petroleum ether/EtOAc = 60/1 ~ 10/1) to yield the product **63** as a light yellow solid (38.7 mg, 94% yield, 92% e.e.).

**HPLC** analysis: Chiralcel OZ-3 (*n*-Hexane/*i*-PrOH = 90/10, flow rate 0.8 mL/min,  $\lambda$  = 254 nm),  $t_R$  (minor) = 18.76 min,  $t_R$  (major) = 23.65 min.

**<sup>1</sup>H NMR** (400 MHz, CDCl<sub>3</sub>)  $\delta$  9.18 (s, 1H), 8.16 – 8.06 (m, 1H), 8.06 – 7.95 (m, 2H), 7.88 – 7.76 (m, 1H), 7.73 – 7.62 (m, 4H), 7.62 – 7.55 (m, 1H), 7.52 – 7.32 (m, 8H), 2.14 (s, 3H).

**<sup>13</sup>C NMR** (100 MHz, CDCl<sub>3</sub>)  $\delta$  191.7, 170.5, 140.9, 136.6, 134.3, 134.2, 132.8, 129.1, 128.9, 128.7, 128.2, 127.7, 127.2, 126.6, 126.4, 126.0, 125.9, 125.6, 120.8, 120.2, 61.3, 27.9.

**HRMS** (ESI)  $m/z$  calcd. for C<sub>26</sub>H<sub>22</sub>NO<sub>2</sub>S [M + H]<sup>+</sup> 412.1366, found: 412.1361.

**(R)-S-(1-(Naphthalen-1-ylamino)-1-oxo-2-phenylpentan-2-yl) benzothioate (64)**

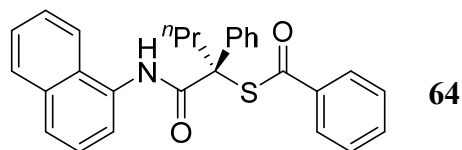

According to **General procedure C**, 2-chloro-*N*-(naphthalen-1-yl)-2-phenylpentanamide **E62** (33.8 mg, 0.10 mmol, 1.0 eq.) with thiobenzoic acid **S9** (17.7  $\mu$ L, 0.15 mmol, 1.5 eq.). The reaction mixture was purified by column chromatography on silica gel (petroleum ether/EtOAc = 60/1 ~ 10/1) to yield the product **64** as a light yellow solid (40.9 mg, 93% yield, 92% e.e.).

**HPLC** analysis: Chiralcel OD-3 (*n*-Hexane/*i*-PrOH = 90/10, flow rate 0.5 mL/min,  $\lambda$  = 254 nm),  $t_R$  (minor) = 13.41 min,  $t_R$  (major) = 18.51 min.

**<sup>1</sup>H NMR** (400 MHz, CDCl<sub>3</sub>)  $\delta$  9.17 (s, 1H), 8.09 (d,  $J$  = 7.5 Hz, 1H), 8.00 (d,  $J$  = 7.8 Hz, 2H), 7.80 (d,  $J$  = 8.1 Hz, 1H), 7.66 – 7.61 (m, 4H), 7.58 (t,  $J$  = 7.4 Hz, 1H), 7.50 – 7.32 (m, 8H), 2.58 – 2.48 (m, 1H), 2.40 – 2.29 (m, 1H), 1.45 – 1.28 (m, 2H), 0.91 (t,  $J$  = 7.3 Hz, 3H).

**<sup>13</sup>C NMR** (100 MHz, CDCl<sub>3</sub>)  $\delta$  191.9, 170.6, 139.0, 136.8, 134.2, 134.1, 132.9, 128.9, 128.7(1), 128.6(6), 128.0, 127.7, 127.4, 127.2, 126.3, 125.9, 125.8, 125.4, 120.9, 120.1, 65.6, 41.6, 18.5, 14.4.

**HRMS** (ESI)  $m/z$  calcd. for C<sub>28</sub>H<sub>26</sub>NO<sub>2</sub>S [M + H]<sup>+</sup> 440.1679, found: 440.1675.

**(R)-S-(1-(Naphthalen-1-ylamino)-1-oxo-2,3-diphenylpropan-2-yl) benzothioate (65)**

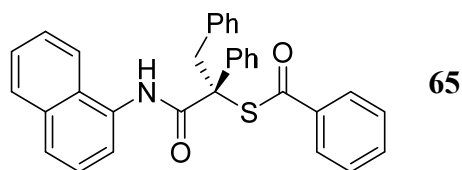

According to **General procedure C**, 2-chloro-*N*-(naphthalen-1-yl)-2,3-diphenylpropanamide **E63** (38.6 mg, 0.10 mmol, 1.0 eq.) with thiobenzoic acid **S9** (17.7  $\mu$ L, 0.15 mmol, 1.5 eq.). The reaction mixture was purified by column chromatography on silica gel (petroleum ether/EtOAc = 60/1 ~ 10/1) to yield the product **65** as a white solid (46.4 mg, 95% yield, 95% e.e.).

**HPLC** analysis: Chiralcel AD-3 (*n*-Hexane/*i*-PrOH = 85/15, flow rate 0.8 mL/min,  $\lambda$  = 254 nm),  $t_R$  (major) = 21.68 min,  $t_R$  (minor) = 24.15 min.

**$^1\text{H}$  NMR** (400 MHz,  $\text{CDCl}_3$ )  $\delta$  8.98 (s, 1H), 8.07 – 8.03 (m, 1H), 8.02 – 7.96 (m, 2H), 7.83 – 7.76 (m, 1H), 7.67 – 7.63 (m, 1H), 7.61 – 7.56 (m, 1H), 7.56 – 7.53 (m, 1H), 7.51 – 7.44 (m, 3H), 7.43 – 7.39 (m, 1H), 7.39 – 7.35 (m, 2H), 7.34 – 7.28 (m, 4H), 7.19 – 7.13 (m, 1H), 7.12 – 7.06 (m, 2H), 6.80 – 6.74 (m, 2H), 3.83 (s, 2H).

**$^{13}\text{C}$  NMR** (100 MHz,  $\text{CDCl}_3$ )  $\delta$  191.0, 170.6, 138.0, 136.8, 135.8, 134.3, 134.1, 132.7, 131.6, 129.0, 128.6, 128.5, 128.3, 127.7(6), 127.7(0), 127.5, 127.4, 126.9, 126.3, 125.9, 125.8, 125.7, 120.9, 120.5, 66.0, 44.5.

**HRMS** (ESI)  $m/z$  calcd. for  $\text{C}_{32}\text{H}_{26}\text{NO}_2\text{S}$   $[\text{M} + \text{H}]^+$  488.1679, found: 488.1675.

**(R)-S-(1-(Naphthalen-1-ylamino)-1-oxo-2,4-diphenylbutan-2-yl) benzothioate (66)**

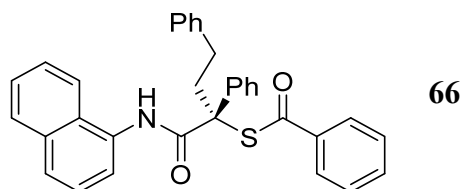

According to **General procedure C**, 2-chloro-*N*-(naphthalen-1-yl)-2,4-diphenylbutanamide **E64** (39.0 mg, 0.10 mmol, 1.0 eq.) with thiobenzoic acid **S9** (17.7  $\mu$ L, 0.15 mmol, 1.5 eq.). The reaction mixture was purified by column chromatography on silica gel (petroleum ether/EtOAc = 60/1 ~ 10/1) to yield the product **66** as a light yellow solid (44.1 mg, 88% yield, 93% e.e.).

**HPLC** analysis: Chiralcel AD-3 (*n*-Hexane/*i*-PrOH = 85/15, flow rate 0.8 mL/min,  $\lambda$  = 254 nm),  $t_R$  (major) = 27.03 min,  $t_R$  (minor) = 37.59 min.

**$^1\text{H}$  NMR** (400 MHz,  $\text{CDCl}_3$ )  $\delta$  9.20 (s, 1H), 8.12 – 8.07 (m, 1H), 8.04 – 7.98 (m, 2H), 7.85 – 7.80 (m, 1H), 7.73 – 7.64 (m, 4H), 7.63 – 7.58 (m, 1H), 7.52 – 7.42 (m, 6H), 7.41 – 7.35 (m, 2H), 7.25 – 7.21 (m, 2H), 7.18 – 7.12 (m, 3H), 2.95 – 2.84 (m, 1H), 2.77 – 2.57 (m, 3H).

**$^{13}\text{C}$  NMR** (100 MHz,  $\text{CDCl}_3$ )  $\delta$  191.7, 170.3, 141.7, 138.8, 136.8, 134.3, 134.2, 132.8, 128.9(6), 128.9(5), 128.7, 128.6, 128.5, 128.3, 127.7, 127.4, 127.3, 126.4, 126.1, 126.0, 125.9, 125.6, 121.0, 120.3, 65.3, 41.6, 31.7.

HRMS (ESI)  $m/z$  calcd. for  $C_{33}H_{28}NO_2S$   $[M + H]^+$  502.1835, found: 502.1830.

**(*R*)-*S*-(3-Cyclopropyl-1-(naphthalen-1-ylamino)-1-oxo-2-phenylpropan-2-yl)benzothioate (67)**

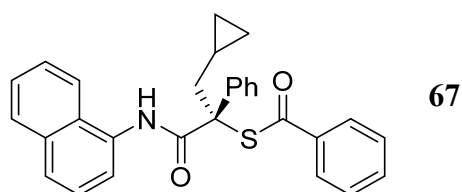

According to **General procedure C**, 2-chloro-3-cyclopropyl-*N*-(naphthalen-1-yl)-2-phenylpropanamide **E65** (35.0 mg, 0.10 mmol, 1.0 eq.) with thiobenzoic acid **S9** (17.7  $\mu$ L, 0.15 mmol, 1.5 eq.). The reaction mixture was purified by column chromatography on silica gel (petroleum ether/EtOAc = 60/1 ~ 10/1) to yield the product **67** as a light yellow solid (40.7 mg, 90% yield, 93% e.e.).

**HPLC** analysis: Chiralcel ODH (*n*-Hexane/*i*-PrOH = 90/10, flow rate 0.8 mL/min,  $\lambda$  = 254 nm),  $t_R$  (minor) = 9.87 min,  $t_R$  (major) = 13.09 min.

**$^1H$  NMR** (400 MHz,  $CDCl_3$ )  $\delta$  9.18 (s, 1H), 8.17 – 8.08 (m, 1H), 8.07 – 7.98 (m, 2H), 7.87 – 7.79 (m, 1H), 7.73 – 7.56 (m, 5H), 7.53 – 7.46 (m, 3H), 7.46 – 7.38 (m, 4H), 7.38 – 7.34 (m, 1H), 2.53 (dd,  $J$  = 14.6, 6.4 Hz, 1H), 2.39 (dd,  $J$  = 14.6, 6.9 Hz, 1H), 0.95 – 0.77 (m, 1H), 0.48 – 0.39 (m, 1H), 0.39 – 0.31 (m, 1H), 0.08 – 0.00 (m, 1H), 0.00 – -0.09 (m, 1H).

**$^{13}C$  NMR** (100 MHz,  $CDCl_3$ )  $\delta$  191.9, 170.7, 139.1, 136.9, 134.1(5), 134.1(3), 132.8, 128.9, 128.7, 128.6, 128.0, 127.7, 127.5, 127.2, 126.3, 125.9, 125.8, 125.4, 120.9, 120.1, 66.3, 44.3, 7.1, 5.4, 5.1.

HRMS (ESI)  $m/z$  calcd. for  $C_{29}H_{26}NO_2S$   $[M + H]^+$  452.1679, found:452.1675

**(*R*)-*S*-(5,5,5-Trifluoro-1-(naphthalen-1-ylamino)-1-oxo-2-phenylpentan-2-yl)benzothioate (68)**

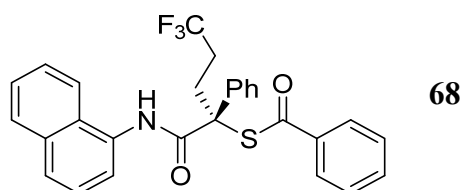

According to **General procedure C**, 2-chloro-5,5,5-trifluoro-*N*-(naphthalen-1-yl)-2-phenylpentanamide **E66** (39.2 mg, 0.10 mmol, 1.0 eq.) with thiobenzoic acid **S9** (17.7  $\mu$ L, 0.15 mmol, 1.5 eq.). The reaction mixture was purified by column chromatography on silica gel (petroleum ether/EtOAc = 60/1 ~ 10/1) to yield the product **68** as a yellow solid (42.0 mg, 85% yield, 92% e.e.).

**HPLC** analysis: Chiralcel OD-3 (*n*-Hexane/*i*-PrOH = 90/10, flow rate 0.5 mL/min,  $\lambda$  = 254 nm),  $t_R$  (minor) = 12.82 min,  $t_R$  (major) = 15.72 min.

**$^1H$  NMR** (400 MHz,  $CDCl_3$ )  $\delta$  9.09 (s, 1H), 8.05 – 7.96 (m, 3H), 7.86 – 7.79 (m, 1H), 7.70 – 7.56 (m, 5H), 7.52 – 7.39 (m, 7H), 7.39 – 7.32 (m, 1H), 3.02 – 2.88 (m, 1H), 2.63 – 2.52 (m, 1H), 2.39 – 2.20 (m, 1H), 2.20 – 2.00 (m, 1H).

$^{13}\text{C}$  NMR (100 MHz,  $\text{CDCl}_3$ )  $\delta$  190.7, 169.8, 137.6, 136.4, 134.6, 134.2, 132.4, 129.3, 129.1, 128.8(2), 128.7(7), 127.8, 127.3, 127.1(0) (q,  $J = 276.4$  Hz), 127.0(6), 126.5, 126.0, 125.9, 125.8, 120.8, 120.5, 63.6, 32.2 (q,  $J = 3.0$  Hz), 30.4 (q,  $J = 28.6$  Hz).

$^{19}\text{F}$  NMR (376 MHz,  $\text{CDCl}_3$ )  $\delta$  -66.23.

HRMS (ESI)  $m/z$  calcd. for  $\text{C}_{28}\text{H}_{23}\text{F}_3\text{NO}_2\text{S}$   $[\text{M} + \text{H}]^+$  494.1396, found: 494.1393.

**(*R*)-*S*-(1-(Naphthalen-1-ylamino)-1-oxo-2-phenylpent-4-en-2-yl) benzothioate (69)**

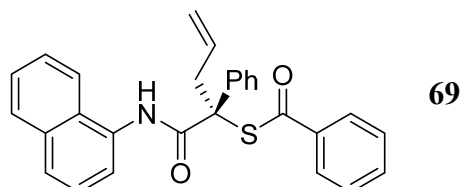

According to **General procedure C**, 2-chloro-*N*-(naphthalen-1-yl)-2-phenylpent-4-enamide **E67** (33.6 mg, 0.10 mmol, 1.0 eq.) with thiobenzoic acid **S9** (17.7  $\mu\text{L}$ , 0.15 mmol, 1.5 eq.). The reaction mixture was purified by column chromatography on silica gel (petroleum ether/EtOAc = 60/1 ~ 10/1) to yield the product **69** as a light yellow solid (41.1 mg, 94% yield, 90% e.e.).

HPLC analysis: Chiralcel OZ-3 (*n*-Hexane/*i*-PrOH = 90/10, flow rate 0.5 mL/min,  $\lambda = 254$  nm),  $t_R$  (major) = 30.88 min,  $t_R$  (minor) = 46.89 min.

$^1\text{H}$  NMR (400 MHz,  $\text{CDCl}_3$ )  $\delta$  9.14 (s, 1H), 8.10 – 8.03 (m, 1H), 8.03 – 7.97 (m, 2H), 7.84 – 7.78 (m, 1H), 7.68 – 7.56 (m, 5H), 7.51 – 7.43 (m, 3H), 7.43 – 7.38 (m, 3H), 7.38 – 7.32 (m, 2H), 5.89 – 5.66 (m, 1H), 5.15 – 4.98 (m, 2H), 3.36 – 3.18 (m, 2H).

$^{13}\text{C}$  NMR (100 MHz,  $\text{CDCl}_3$ )  $\delta$  191.7, 170.3, 138.6, 136.8, 134.3, 134.2, 133.0, 132.7, 128.9, 128.8, 128.7, 128.2, 127.7, 127.3 (two carbons overlap), 126.3, 125.9, 125.8, 125.6, 120.9, 120.4, 119.7, 64.8, 43.9.

HRMS (ESI)  $m/z$  calcd. for  $\text{C}_{28}\text{H}_{24}\text{NO}_2\text{S}$   $[\text{M} + \text{H}]^+$  438.1522, found: 438.1518.

**(*R*)-*S*-(3-Methyl-1-(naphthalen-1-ylamino)-1-oxo-2-phenylbutan-2-yl) benzothioate (70)**

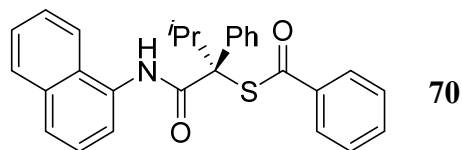

According to **General procedure C**, 2-chloro-3-methyl-*N*-(naphthalen-1-yl)-2-phenylbutanamide **E68** (33.8 mg, 0.10 mmol, 1.0 eq.) with thiobenzoic acid **S9** (17.7  $\mu\text{L}$ , 0.15 mmol, 1.5 eq.). The reaction mixture was purified by column chromatography on silica gel (petroleum ether/EtOAc = 60/1 ~ 10/1) to yield the product **70** as a brown oil (33.0 mg, 75% yield, 89% e.e.).

HPLC analysis: Chiralcel IG (*n*-Hexane/*i*-PrOH = 85/15, flow rate 0.8 mL/min,  $\lambda = 254$  nm),  $t_R$  (minor) = 15.26 min,  $t_R$  (major) = 16.09 min.

$^1\text{H}$  NMR (400 MHz,  $\text{CDCl}_3$ )  $\delta$  9.45 (s, 1H), 8.14 (d,  $J = 7.6$  Hz, 1H), 7.99 (d,  $J = 7.8$  Hz, 2H), 7.81 (d,  $J = 8.0$  Hz, 1H), 7.74 – 7.69 (m, 1H), 7.66 – 7.55 (m, 4H), 7.52 – 7.42

(m, 4H), 7.42 – 7.36 (m, 4H), 3.01 – 2.88 (m, 1H), 1.13 (d,  $J = 6.8$  Hz, 3H), 1.01 (d,  $J = 6.7$  Hz, 3H).

$^{13}\text{C}$  NMR (100 MHz,  $\text{CDCl}_3$ )  $\delta$  192.7, 170.1, 137.0, 136.1, 134.2 (two carbon overlapped), 133.1, 128.9, 128.8, 128.6, 127.9(9), 127.9(6), 127.7, 127.2, 126.3, 125.9, 125.8, 125.3, 121.2, 119.9, 70.0, 36.2, 19.2, 18.9.

HRMS (ESI)  $m/z$  calcd. for  $\text{C}_{28}\text{H}_{26}\text{NO}_2\text{S}$   $[\text{M} + \text{H}]^+$  440.1679, found: 440.1674.

**(*R*)-*S*-(2-(4-(*Tert*-butyl)phenyl)-1-(naphthalen-1-ylamino)-1-oxobutan-2-yl)benzothioate (71)**

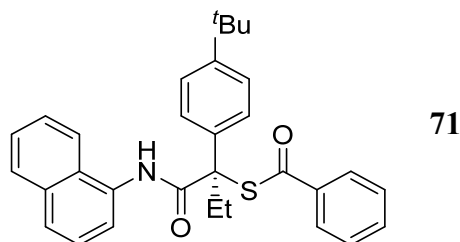

According to **General procedure C**, 2-chloro-2-(4-isobutylphenyl)-*N*-(naphthalen-1-yl)butanamide **E69** (48.2 mg, 0.10 mmol, 1.0 eq.) with thiobenzoic acid **S9** (17.7  $\mu\text{L}$ , 0.15 mmol, 1.5 eq.). The reaction mixture was purified by column chromatography on silica gel (petroleum ether/EtOAc = 60/1 ~ 10/1) to yield the product **71** as a light yellow oil (45.3 mg, 94% yield, 88% e.e.).

HPLC analysis: Chiralcel AD-3 (*n*-Hexane/*i*-PrOH = 95/5, flow rate 0.3 mL/min,  $\lambda = 254$  nm),  $t_R$  (major) = 65.30 min,  $t_R$  (minor) = 76.48 min.

$^1\text{H}$  NMR (400 MHz,  $\text{CDCl}_3$ )  $\delta$  8.95 (s, 1H), 8.11 – 8.01 (m, 3H), 7.82 (d,  $J = 8.2$  Hz, 1H), 7.67 (d,  $J = 8.3$  Hz, 1H), 7.63 – 7.54 (m, 4H), 7.52 – 7.41 (m, 6H), 7.35 (t,  $J = 7.8$  Hz, 1H), 2.77 – 2.64 (m, 1H), 2.60 – 2.49 (m, 1H), 1.37 (s, 9H), 1.01 (t,  $J = 7.3$  Hz, 3H).

$^{13}\text{C}$  NMR (100 MHz,  $\text{CDCl}_3$ )  $\delta$  191.4, 170.8, 151.0, 137.0, 135.4, 134.1, 134.0, 132.7, 128.8, 128.6, 127.6, 127.3, 127.1, 126.2, 125.9, 125.8, 125.6, 125.4, 120.9, 120.3, 66.1, 34.6, 31.7, 31.4, 9.7.

HRMS (ESI)  $m/z$  calcd. for  $\text{C}_{31}\text{H}_{32}\text{NO}_2\text{S}$   $[\text{M} + \text{H}]^+$  482.2148, found: 482.2142.

**(*R*)-*S*-(2-(4-Bromophenyl)-1-(naphthalen-1-ylamino)-1-oxobutan-2-yl)benzothioate (72)**

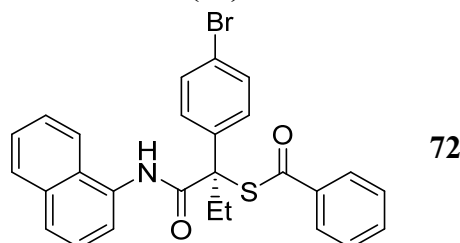

According to **General procedure C**, 2-(4-bromophenyl)-2-chloro-*N*-(naphthalen-1-yl)butanamide **E70** (40.3 mg, 0.10 mmol, 1.0 eq.) with thiobenzoic acid **S9** (17.7  $\mu\text{L}$ , 0.15 mmol, 1.5 eq.). The reaction mixture was purified by column chromatography on silica gel (petroleum ether/EtOAc = 60/1 ~ 10/1) to yield the product **72** as a brown

solid (46.9 mg, 93% yield, 89% e.e.).

**HPLC** analysis: Chiralcel AD-3 (*n*-Hexane/*i*-PrOH = 85/15, flow rate 0.5 mL/min,  $\lambda$  = 254 nm),  $t_R$  (minor) = 23.44 min,  $t_R$  (major) = 28.73 min.

**$^1\text{H}$  NMR** (400 MHz,  $\text{CDCl}_3$ )  $\delta$  9.19 (s, 1H), 8.09 – 8.04 (m, 1H), 8.03 – 7.96 (m, 2H), 7.85 – 7.79 (m, 1H), 7.69 – 7.63 (m, 2H), 7.63 – 7.58 (m, 1H), 7.56 – 7.36 (m, 9H), 2.63 – 2.49 (m, 1H), 2.47 – 2.34 (m, 1H), 0.95 (t,  $J$  = 7.3 Hz, 3H).

**$^{13}\text{C}$  NMR** (100 MHz,  $\text{CDCl}_3$ )  $\delta$  191.9, 170.0, 137.9, 136.7, 134.4, 134.2, 132.7, 131.8, 129.3, 129.0, 128.7, 127.7, 127.2, 126.5, 126.0, 125.8, 125.6, 122.1, 120.8, 120.2, 65.6, 32.5, 9.6.

**HRMS** (ESI)  $m/z$  calcd. for  $\text{C}_{27}\text{H}_{23}\text{BrNO}_2\text{S}$   $[\text{M} + \text{H}]^+$  504.0627, found: 504.0622.

**(*R*)-*S*-(2-(3-Fluorophenyl)-1-(naphthalen-1-ylamino)-1-oxobutan-2-yl) benzothioate (73)**

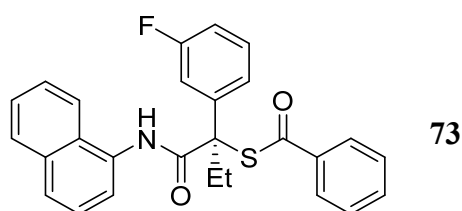

According to **General procedure C**, 2-chloro-2-(3-fluorophenyl)-*N*-(naphthalen-1-yl)butanamide **E71** (34.2 mg, 0.10 mmol, 1.0 eq.) with thiobenzoic acid **S9** (17.7  $\mu\text{L}$ , 0.15 mmol, 1.5 eq.). The reaction mixture was purified by column chromatography on silica gel (petroleum ether/EtOAc = 60/1 ~ 10/1) to yield the product **73** as a yellow solid (39.9 mg, 90% yield, 90% e.e.).

**HPLC** analysis: Chiralcel OD-3 (*n*-Hexane/*i*-PrOH = 90/10, flow rate 0.5 mL/min,  $\lambda$  = 254 nm),  $t_R$  (minor) = 16.56 min,  $t_R$  (major) = 19.17 min.

**$^1\text{H}$  NMR** (400 MHz,  $\text{CDCl}_3$ )  $\delta$  9.15 (s, 1H), 8.09 – 8.03 (m, 1H), 8.03 – 7.96 (m, 2H), 7.84 – 7.78 (m, 1H), 7.68 – 7.63 (m, 2H), 7.63 – 7.57 (m, 1H), 7.51 – 7.42 (m, 4H), 7.42 – 7.33 (m, 4H), 7.09 – 7.03 (m, 1H), 2.66 – 2.54 (m, 1H), 2.48 – 2.37 (m, 1H), 0.96 (t,  $J$  = 7.3 Hz, 3H).

**$^{13}\text{C}$  NMR** (100 MHz,  $\text{CDCl}_3$ )  $\delta$  191.7, 169.9, 162.9 (d,  $J$  = 246.6 Hz), 141.4 (d,  $J$  = 7.1 Hz), 136.7, 134.4, 134.2, 132.7, 130.2 (d,  $J$  = 8.3 Hz), 129.0, 128.7, 127.7, 127.3, 126.4, 126.0, 125.8, 125.7, 123.2 (d,  $J$  = 2.8 Hz), 120.8, 120.3, 115.1 (d,  $J$  = 21.0 Hz), 114.8 (d,  $J$  = 23.5 Hz), 65.6 (d,  $J$  = 1.8 Hz), 32.5, 9.6.

**$^{19}\text{F}$  NMR** (376 MHz,  $\text{CDCl}_3$ )  $\delta$  -111.88.

**HRMS** (ESI)  $m/z$  calcd. for  $\text{C}_{27}\text{H}_{23}\text{FNO}_2\text{S}$   $[\text{M} + \text{H}]^+$  444.1428, found: 444.1421.

**(*R*)-*S*-(1-(Naphthalen-1-ylamino)-1-oxo-2-(*p*-tolyl)propan-2-yl) benzothioate (74)**

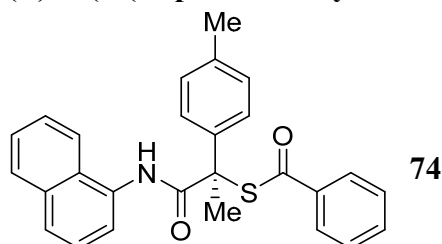

According to **General procedure C**, 2-chloro-*N*-(naphthalen-1-yl)-2-(*p*-tolyl)propanamide **E72** (32.4 mg, 0.10 mmol, 1.0 eq.) with thiobenzoic acid **S9** (17.7  $\mu$ L, 0.15 mmol, 1.5 eq.). The reaction mixture was purified by column chromatography on silica gel (petroleum ether/EtOAc = 60/1 ~ 10/1) to yield the product **74** as a yellow solid (39.2 mg, 92% yield, 91% e.e.).

**HPLC** analysis: Chiralcel AD-3 (*n*-Hexane/*i*-PrOH = 85/15, flow rate 0.8 mL/min,  $\lambda$  = 254 nm),  $t_R$  (major) = 19.06 min,  $t_R$  (minor) = 25.50 min.

**$^1\text{H}$  NMR** (400 MHz,  $\text{CDCl}_3$ )  $\delta$  9.16 (s, 1H), 8.13 – 8.09 (m, 1H), 8.02 – 7.97 (m, 2H), 7.84 – 7.80 (m, 1H), 7.71 – 7.64 (m, 2H), 7.62 – 7.57 (m, 1H), 7.56 – 7.52 (m, 2H), 7.51 – 7.42 (m, 4H), 7.42 – 7.36 (m, 1H), 7.24 – 7.20 (m, 2H), 2.37 (s, 3H), 2.12 (s, 3H).

**$^{13}\text{C}$  NMR** (100 MHz,  $\text{CDCl}_3$ )  $\delta$  191.8, 170.7, 138.1, 137.9, 136.7, 134.2(1), 134.1(7), 132.8, 129.8, 128.9, 128.7, 127.7, 127.2, 126.5, 126.4, 126.0, 125.9, 125.5, 120.9, 120.2, 61.2, 27.8, 21.2.

**HRMS** (ESI)  $m/z$  calcd. for  $\text{C}_{27}\text{H}_{24}\text{NO}_2\text{S}$   $[\text{M} + \text{H}]^+$  426.1522, found: 426.1516.

**(*R*)-*S*-(2-(4-Isobutylphenyl)-1-(naphthalen-1-ylamino)-1-oxopropan-2-yl)benzothioate (75)**

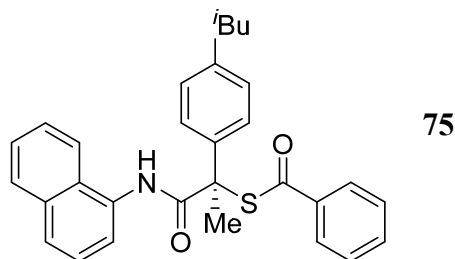

According to **General procedure C**, 2-chloro-2-(4-isobutylphenyl)-*N*-(naphthalen-1-yl)propanamide **E73** (36.6 mg, 0.10 mmol, 1.0 eq.) with thiobenzoic acid **S9** (17.7  $\mu$ L, 0.15 mmol, 1.5 eq.). The reaction mixture was purified by column chromatography on silica gel (petroleum ether/EtOAc = 60/1 ~ 10/1) to yield the product **75** as a brown solid (42.1 mg, 90% yield, 93% e.e.).

**HPLC** analysis: Chiralcel IA (*n*-Hexane/*i*-PrOH = 85/15, flow rate 0.8 mL/min,  $\lambda$  = 254 nm),  $t_R$  (major) = 11.79 min,  $t_R$  (minor) = 14.54 min.

**$^1\text{H}$  NMR** (400 MHz,  $\text{CDCl}_3$ )  $\delta$  9.04 (s, 1H), 8.12 – 8.05 (m, 1H), 8.02 – 7.95 (m, 2H), 7.84 – 7.78 (m, 1H), 7.69 – 7.63 (m, 1H), 7.63 – 7.53 (m, 4H), 7.52 – 7.39 (m, 4H), 7.38 – 7.31 (m, 1H), 7.22 – 7.16 (m, 2H), 2.50 (d,  $J$  = 7.2 Hz, 2H), 2.17 (s, 3H), 1.96 – 1.80 (m, 1H), 0.92 (d,  $J$  = 6.5 Hz, 6H).

**$^{13}\text{C}$  NMR** (100 MHz,  $\text{CDCl}_3$ )  $\delta$  191.5, 170.7, 141.9, 138.0, 136.8, 134.1(6), 134.1(3), 132.7, 129.8, 128.9, 128.7, 127.6, 127.2, 126.5, 126.3, 125.9(4), 125.9(1), 125.5, 120.8, 120.2, 61.3, 45.1, 30.2, 27.5, 22.6, 22.5.

**HRMS** (ESI)  $m/z$  calcd. for  $\text{C}_{30}\text{H}_{29}\text{NO}_2\text{S}$   $[\text{M} + \text{H}]^+$  468.1992, found: 468.1987.

**(*R*)-*S*-(2-(3-Methoxyphenyl)-1-(naphthalen-1-ylamino)-1-oxopropan-2-yl)benzothioate (76)**



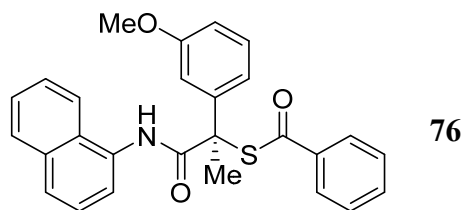

According to **General procedure C**, 2-chloro-2-(3-methoxyphenyl)-*N*-(naphthalen-1-yl)propanamide **E74** (34.0 mg, 0.10 mmol, 1.0 eq.) with thiobenzoic acid **S9** (17.7  $\mu$ L, 0.15 mmol, 1.5 eq.). The reaction mixture was purified by column chromatography on silica gel (petroleum ether/EtOAc = 60/1 ~ 10/1) to yield the product **76** as a light yellow solid (40.2 mg, 91% yield, 92% e.e.).

**HPLC** analysis: Chiralcel IF (*n*-Hexane/*i*-PrOH = 85/15, flow rate 0.5 mL/min,  $\lambda$  = 254 nm),  $t_R$  (major) = 41.58 min,  $t_R$  (minor) = 47.27 min.

**$^1\text{H}$  NMR** (400 MHz,  $\text{CDCl}_3$ )  $\delta$  9.15 (s, 1H), 8.11 – 8.06 (m, 1H), 8.02 – 7.96 (m, 2H), 7.84 – 7.79 (m, 1H), 7.72 – 7.64 (m, 2H), 7.62 – 7.56 (m, 1H), 7.51 – 7.41 (m, 4H), 7.41 – 7.36 (m, 1H), 7.33 (t,  $J$  = 8.0 Hz, 1H), 7.27 – 7.24 (m, 1H), 7.22 (t,  $J$  = 2.2 Hz, 1H), 6.92 – 6.87 (m, 1H), 3.77 (s, 3H), 2.14 (s, 3H).

**$^{13}\text{C}$  NMR** (100 MHz,  $\text{CDCl}_3$ )  $\delta$  191.6, 170.4, 160.0, 142.5, 136.7, 134.2(4), 134.1(6), 132.7, 130.1, 128.9, 128.7, 127.7, 127.3, 126.4, 126.0, 125.9, 125.6, 120.9, 120.3, 118.9, 113.4, 112.8, 61.2, 55.4, 27.8.

**HRMS** (ESI)  $m/z$  calcd. for  $\text{C}_{27}\text{H}_{24}\text{NO}_2\text{S}$  [ $\text{M} + \text{H}$ ] $^+$  442.1471, found: 442.1465.

**(*R*)-*S*-(2-(4-Chlorophenyl)-1-(naphthalen-1-ylamino)-1-oxopropan-2-yl)benzothioate (**77**)**

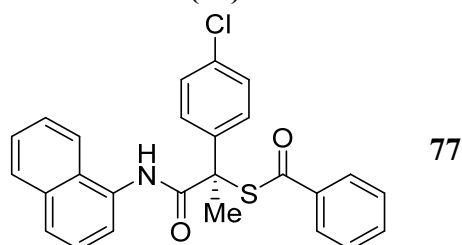

According to **General procedure C**, 2-chloro-2-(4-chlorophenyl)-*N*-(naphthalen-1-yl)propanamide **E75** (34.4 mg, 0.10 mmol, 1.0 eq.) with thiobenzoic acid **S9** (17.7  $\mu$ L, 0.15 mmol, 1.5 eq.). The reaction mixture was purified by column chromatography on silica gel (petroleum ether/EtOAc = 60/1 ~ 10/1) to yield the product **77** as a brown solid (40.6 mg, 91% yield, 95% e.e.).

**HPLC** analysis: Chiralcel OD-3 (*n*-Hexane/*i*-PrOH = 95/5, flow rate 0.4 mL/min,  $\lambda$  = 254 nm),  $t_R$  (minor) = 47.99 min,  $t_R$  (major) = 52.05min.

**$^1\text{H}$  NMR** (400 MHz,  $\text{CDCl}_3$ )  $\delta$  9.24 (s, 1H), 8.12 – 8.04 (m, 1H), 8.02 – 7.94 (m, 2H), 7.86 – 7.79 (m, 1H), 7.72 – 7.65 (m, 2H), 7.63 – 7.55 (m, 3H), 7.51 – 7.40 (m, 5H), 7.40 – 7.34 (m, 2H), 2.09 (s, 3H).

**$^{13}\text{C}$  NMR** (100 MHz,  $\text{CDCl}_3$ )  $\delta$  191.8, 170.1, 139.6, 136.4, 134.5, 134.1(7), 134.1(2), 132.6, 129.2, 129.0, 128.8, 128.1, 127.7, 127.2, 126.5, 126.0, 125.9, 125.7, 120.7, 120.3, 60.6, 28.0.

**HRMS** (ESI)  $m/z$  calcd. for  $\text{C}_{26}\text{H}_{21}\text{ClNO}_2\text{S}$  [ $\text{M} + \text{H}$ ] $^+$  446.0976, found: 446.0971.

**(R)-S-(1-(Naphthalen-1-ylamino)-1-oxo-2-(3-(trifluoromethyl)phenyl)propan-2-yl) benzothioate (78)**

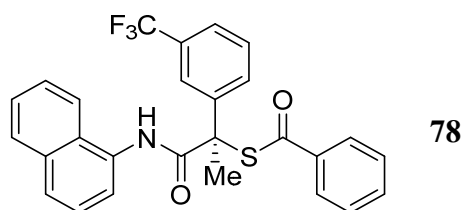

According to **General procedure C**, 2-chloro-*N*-(naphthalen-1-yl)-2-(3-(trifluoromethyl)phenyl)propanamide **E76** (37.8 mg, 0.10 mmol, 1.0 eq.) with thiobenzoic acid **S9** (17.7  $\mu$ L, 0.15 mmol, 1.5 eq.). The reaction mixture was purified by column chromatography on silica gel (petroleum ether/EtOAc = 60/1 ~ 10/1) to yield the product **78** as a light yellow oil (45.6 mg, 95% yield, 84% e.e.).

**HPLC** analysis: Chiralcel OD-3 (*n*-Hexane/*i*-PrOH = 90/10, flow rate 0.5 mL/min,  $\lambda$  = 254 nm),  $t_R$  (minor) = 22.00 min,  $t_R$  (major) = 27.05 min.

**$^1\text{H}$  NMR** (400 MHz,  $\text{CDCl}_3$ )  $\delta$  9.21 (s, 1H), 8.05 – 7.92 (m, 4H), 7.88 – 7.80 (m, 2H), 7.71 – 7.66 (m, 2H), 7.65 – 7.57 (m, 2H), 7.56 – 7.51 (m, 1H), 7.51 – 7.37 (m, 5H), 2.19 – 2.08 (m, 3H).

**$^{13}\text{C}$  NMR** (100 MHz,  $\text{CDCl}_3$ )  $\delta$  191.6, 169.9, 142.2, 136.3, 134.6, 134.2, 132.4, 131.4 (q,  $J$  = 32.2 Hz), 130.1, 129.6, 129.0, 128.7, 127.7, 127.5, 126.5, 126.1, 126.0, 125.8, 125.1 (q,  $J$  = 3.8 Hz), 124.0 (q,  $J$  = 272.7 Hz), 123.6 (q,  $J$  = 4.0, 3.5 Hz), 120.8(2), 120.7(9), 60.6, 27.9.

**$^{19}\text{F}$  NMR** (376 MHz,  $\text{CDCl}_3$ )  $\delta$  -62.52.

**HRMS** (ESI)  $m/z$  calcd. for  $\text{C}_{27}\text{H}_{21}\text{F}_3\text{NO}_2\text{S}$  [ $\text{M} + \text{H}$ ] $^+$  480.1240, found: 480.1232.

**(R)-S-(1-(Naphthalen-1-ylamino)-2-(naphthalen-2-yl)-1-oxopropan-2-yl) benzothioate (79)**

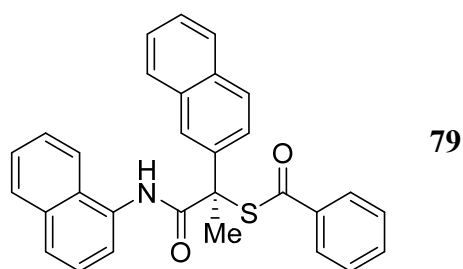

According to **General procedure C**, 2-chloro-*N*-(naphthalen-1-yl)-2-(naphthalen-2-yl)propanamide **E77** (36.0 mg, 0.10 mmol, 1.0 eq.) with thiobenzoic acid **S9** (17.7  $\mu$ L, 0.15 mmol, 1.5 eq.). The reaction mixture was purified by column chromatography on silica gel (petroleum ether/EtOAc = 60/1 ~ 10/1) to yield the product **79** as a white solid (40.2 mg, 87% yield, 88% e.e.).

**HPLC** analysis: Chiralcel AD-3 (*n*-Hexane/*i*-PrOH = 85/15, flow rate 0.8 mL/min,  $\lambda$  = 254 nm),  $t_R$  (major) = 22.63 min,  $t_R$  (minor) = 29.47 min.

<sup>1</sup>H NMR (400 MHz, CDCl<sub>3</sub>) δ 9.28 (s, 1H), 8.16 – 8.07 (m, 2H), 8.05 – 7.97 (m, 2H), 7.92 – 7.87 (m, 1H), 7.87 – 7.76 (m, 4H), 7.71 – 7.65 (m, 2H), 7.63 – 7.57 (m, 1H), 7.55 – 7.48 (m, 3H), 7.48 – 7.38 (m, 3H), 7.34 – 7.28 (m, 1H), 2.21 (s, 3H).

<sup>13</sup>C NMR (100 MHz, CDCl<sub>3</sub>) δ 191.8, 170.6, 138.3, 136.7, 134.3, 134.2, 133.3, 132.9, 132.8, 129.0(3), 128.9(7), 128.7, 128.4, 127.7(4), 127.7(2), 127.4, 126.8 (two carbon overlapped), 126.4, 126.0, 125.9(0), 125.8(5), 125.7, 124.3, 120.9, 120.5, 61.5, 27.9.

HRMS (ESI) *m/z* calcd. for C<sub>30</sub>H<sub>24</sub>NO<sub>2</sub>S [M + H]<sup>+</sup> 462.1522, found: 462.1519.

**(R)-S-(1-(Naphthalen-1-ylamino)-1-oxo-2-phenylbutan-2-yl) 3-methylbenzo-  
thioate (80)**

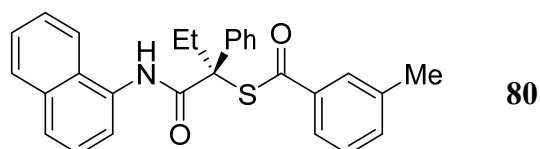

According to **General procedure D**, 2-chloro-*N*-(naphthalen-1-yl)-2-phenylbutanamide **E60** (32.4 mg, 0.10 mmol, 1.0 eq.) with potassium 3-methylbenzothioate **S10** (28.5 mg, 0.15 mmol, 1.5 eq.). The reaction mixture was purified by column chromatography on silica gel (petroleum ether/EtOAc = 60/1 ~ 10/1) to yield the product **80** as a colorless oil (41.8 mg, 95% yield, 95% e.e.).

**HPLC** analysis: Chiralcel AD-3 (*n*-hexane/*i*-PrOH = 90/10, flow rate 0.5 mL/min, λ = 254 nm), *t<sub>R</sub>* (minor) = 20.23 min, *t<sub>R</sub>* (major) = 23.68 min.

<sup>1</sup>H NMR (400 MHz, CDCl<sub>3</sub>) δ 9.16 (s, 1H), 8.11 – 8.04 (m, 1H), 7.84 – 7.76 (m, 3H), 7.67 – 7.59 (m, 4H), 7.49 – 7.44 (m, 1H), 7.44 – 7.30 (m, 7H), 2.67 – 2.55 (m, 1H), 2.50 – 2.40 (m, 1H), 2.38 (s, 3H), 0.95 (t, *J* = 7.4 Hz, 3H).

<sup>13</sup>C NMR (100 MHz, CDCl<sub>3</sub>) δ 192.0, 170.6, 138.8, 138.6, 136.9, 135.0, 134.1, 132.9, 128.8, 128.7, 128.6, 128.1, 128.0, 127.5, 127.2, 126.3, 125.9, 125.8, 125.4, 124.9, 120.9, 120.1, 66.1, 32.4, 21.4, 9.6.

HRMS (ESI) *m/z* calcd. for C<sub>28</sub>H<sub>26</sub>NO<sub>2</sub>S [M + H]<sup>+</sup> 440.1679, found: 440.1675.

**(R)-S-(1-(Naphthalen-1-ylamino)-1-oxo-2-phenylbutan-2-yl) 4-methylbenzo-  
thioate (81)**

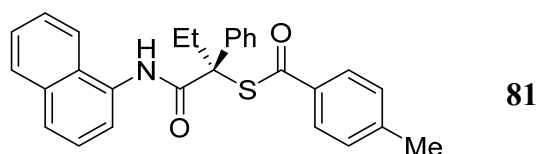

According to **General procedure D**, 2-chloro-*N*-(naphthalen-1-yl)-2-phenylbutanamide **E60** (32.4 mg, 0.10 mmol, 1.0 eq.) with potassium 4-methylbenzothioate **S11** (28.5 mg, 0.15 mmol, 1.5 eq.). The reaction mixture was purified by column chromatography on silica gel (petroleum ether/EtOAc = 60/1 ~ 10/1) to yield the product **81** as a brown oil (41.8 mg, 95% yield, 92% e.e.).

**HPLC** analysis: Chiralcel IA (*n*-hexane/*i*-PrOH = 97/3, flow rate 1.0 mL/min, λ = 254 nm), *t<sub>R</sub>* (minor) = 24.88 min, *t<sub>R</sub>* (major) = 27.25 min.

<sup>1</sup>H NMR (400 MHz, CDCl<sub>3</sub>) δ 9.22 (s, 1H), 8.12 – 8.05 (m, 1H), 7.95 – 7.87 (m, 2H), 7.81 (d, *J* = 8.1 Hz, 1H), 7.68 – 7.58 (m, 4H), 7.50 – 7.45 (m, 1H), 7.45 – 7.32 (m, 5H), 7.28 – 7.22 (m, 2H), 2.66 – 2.53 (m, 1H), 2.48 – 2.36 (m, 4H), 0.94 (t, *J* = 7.3 Hz, 3H).  
<sup>13</sup>C NMR (100 MHz, CDCl<sub>3</sub>) δ 191.5, 170.7, 145.3, 138.7, 134.4, 134.2, 132.9, 129.6, 128.6(7), 128.6(4), 128.0, 127.8, 127.5, 127.3, 126.3, 125.9(1), 125.8(6), 125.4, 121.0, 120.1, 65.9, 32.5, 21.9, 9.6.

HRMS (ESI) *m/z* calcd. for C<sub>28</sub>H<sub>26</sub>NO<sub>2</sub>S [M + H]<sup>+</sup> 440.1670, found: 440.1679.

**(*R*)-*S*-(1-(Naphthalen-1-ylamino)-1-oxo-2-phenylbutan-2-yl) 3-(trifluoromethyl)benzothioate (82)**

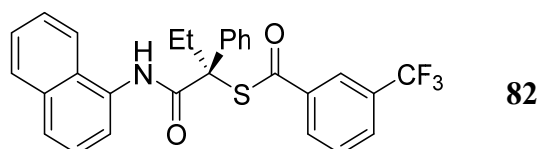

According to **General procedure D**, 2-chloro-*N*-(naphthalen-1-yl)-2-phenylbutanamide **E60** (32.4 mg, 0.10 mmol, 1.0 eq.) with potassium 3-(trifluoromethyl)benzothioate **S12** (36.6 mg, 0.15 mmol, 1.5 eq.). The reaction mixture was purified by column chromatography on silica gel (petroleum ether/EtOAc = 60/1 ~ 10/1) to yield the product **82** as a brown solid (45.4 mg, 92% yield, 96% e.e.).

**HPLC** analysis: Chiralcel IA (*n*-hexane/*i*-PrOH = 97/3, flow rate 1.0 mL/min, λ = 230 nm), *t<sub>R</sub>* (minor) = 16.17 min, *t<sub>R</sub>* (major) = 17.69 min.

<sup>1</sup>H NMR (400 MHz, CDCl<sub>3</sub>) δ 8.86 (s, 1H), 8.28 – 8.22 (m, 1H), 8.21 – 8.15 (m, 1H), 8.10 – 8.02 (m, 1H), 7.88 – 7.77 (m, 2H), 7.69 – 7.62 (m, 3H), 7.62 – 7.56 (m, 1H), 7.56 – 7.52 (m, 1H), 7.50 – 7.46 (m, 1H), 7.46 – 7.33 (m, 5H), 2.76 – 2.62 (m, 1H), 2.56 – 2.42 (m, 1H), 0.98 (t, *J* = 7.3 Hz, 3H).

<sup>13</sup>C NMR (100 MHz, CDCl<sub>3</sub>) δ 190.5, 170.1, 138.3, 137.5, 134.1, 132.6, 131.5 (q, *J* = 33.3 Hz), 130.8, 130.4 (q, *J* = 3.5 Hz), 129.6, 128.9, 128.8, 128.3, 127.5, 127.2, 126.4, 126.0, 125.8, 125.6, 124.4 (q, *J* = 3.8 Hz), 123.5 (q, *J* = 272.6 Hz), 120.6, 120.2, 66.9, 32.0, 9.6.

<sup>19</sup>F NMR (376 MHz, CDCl<sub>3</sub>) δ –62.79.

HRMS (ESI) *m/z* calcd. for C<sub>28</sub>H<sub>23</sub>F<sub>3</sub>NO<sub>2</sub>S [M + H]<sup>+</sup> 494.1387, found: 494.1396.

**(*R*)-*S*-(1-(Naphthalen-1-ylamino)-1-oxo-2-phenylbutan-2-yl) 3-chlorobenzothioate (83)**

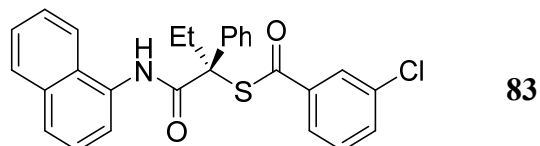

According to **General procedure D**, 2-chloro-*N*-(naphthalen-1-yl)-2-phenylbutanamide **E60** (32.4 mg, 0.10 mmol, 1.0 eq.) with potassium 3-chlorobenzothioate **S13** (31.6 mg, 0.15 mmol, 1.5 eq.). The reaction mixture was purified by column chromatography on silica gel (petroleum ether/EtOAc = 60/1 ~ 10/1) to yield the product **83** as a yellow solid (45.5 mg, 99% yield, 95% e.e.).

**HPLC** analysis: Chiralcel IA (*n*-hexane/*i*-PrOH = 97/3, flow rate 1.0 mL/min, λ = 214

nm),  $t_R$  (minor) = 18.98 min,  $t_R$  (major) = 21.44 min.

$^1\text{H NMR}$  (400 MHz,  $\text{CDCl}_3$ )  $\delta$  8.94 (s, 1H), 8.08 – 8.03 (m, 1H), 7.99 – 7.94 (m, 1H), 7.91 – 7.85 (m, 1H), 7.83 – 7.77 (m, 1H), 7.68 – 7.59 (m, 3H), 7.59 – 7.51 (m, 2H), 7.50 – 7.45 (m, 1H), 7.45 – 7.33 (m, 6H), 2.72 – 2.57 (m, 1H), 2.53 – 2.37 (m, 1H), 0.96 (t,  $J = 7.3$  Hz, 3H).

$^{13}\text{C NMR}$  (100 MHz,  $\text{CDCl}_3$ )  $\delta$  190.5, 170.2, 138.3, 135.2, 134.1, 134.0 (two carbons overlap), 132.6, 130.2, 128.8, 128.7, 128.2, 127.6, 127.5, 127.2, 126.4, 126.0, 125.8, 125.7, 125.6, 120.7, 120.2, 66.7, 32.1, 9.6.

**HRMS** (ESI)  $m/z$  calcd. for  $\text{C}_{27}\text{H}_{23}\text{ClNO}_2\text{S}$   $[\text{M} + \text{H}]^+$  460.1133, found: 460.1120.

**(*R*)-*S*-(1-(Naphthalen-1-ylamino)-1-oxo-2-phenylbutan-2-yl) 3-bromobenzo-  
thioate (84)**

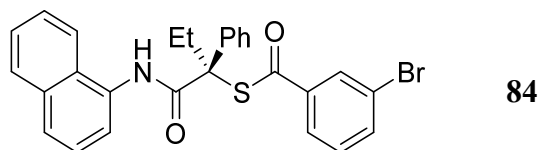

According to **General procedure D**, 2-chloro-*N*-(naphthalen-1-yl)-2-phenylbutanamide **E60** (32.4 mg, 0.10 mmol, 1.0 eq.) with potassium 3-bromobenzothioate **S14** (38.3 mg, 0.15 mmol, 1.5 eq.). The reaction mixture was purified by column chromatography on silica gel (petroleum ether/EtOAc = 60/1 ~ 10/1) to yield the product **84** as a yellow solid (50.0 mg, 99% yield, 94% e.e.).

**HPLC** analysis: Chiralcel IA (*n*-hexane/*i*-PrOH = 97/3, flow rate 1.0 mL/min,  $\lambda = 254$  nm),  $t_R$  (minor) = 19.92 min,  $t_R$  (major) = 22.64 min.

$^1\text{H NMR}$  (400 MHz,  $\text{CDCl}_3$ )  $\delta$  8.92 (s, 1H), 8.14 – 8.08 (m, 1H), 8.08 – 8.02 (m, 1H), 7.96 – 7.88 (m, 1H), 7.84 – 7.77 (m, 1H), 7.72 – 7.67 (m, 1H), 7.67 – 7.59 (m, 3H), 7.58 – 7.53 (m, 1H), 7.49 – 7.34 (m, 6H), 7.34 – 7.27 (m, 1H), 2.76 – 2.53 (m, 1H), 2.53 – 2.33 (m, 1H), 0.96 (t,  $J = 7.3$  Hz, 3H).

$^{13}\text{C NMR}$  (100 MHz,  $\text{CDCl}_3$ )  $\delta$  190.4, 170.2, 138.5, 138.3, 136.9, 134.1, 132.6, 130.5, 130.4, 128.8, 128.7, 128.2, 127.5, 127.2, 126.4, 126.2, 126.0, 125.8, 125.6, 123.1, 120.7, 120.2, 66.7, 32.1, 9.6.

**HRMS** (ESI)  $m/z$  calcd. for  $\text{C}_{27}\text{H}_{23}\text{BrNO}_2\text{S}$   $[\text{M} + \text{H}]^+$  504.0627, found: 504.0616.

**(*R*)-*S*-(1-(Naphthalen-1-ylamino)-1-oxo-2-phenylbutan-2-yl) 3,5-dimethylbenzo-  
thioate (85)**

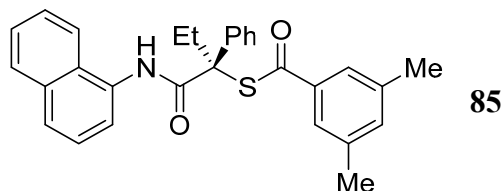

According to **General procedure D**, 2-chloro-*N*-(naphthalen-1-yl)-2-phenylbutanamide **E60** (32.4 mg, 0.10 mmol, 1.0 eq.) with potassium 3,5-dimethylbenzothioate **S15** (30.6 mg, 0.15 mmol, 1.5 eq.). The reaction mixture was purified by column chromatography on silica gel (petroleum ether/EtOAc = 60/1 ~ 10/1) to yield the product **85** as a yellow oil (42.2 mg, 93% yield, 95% e.e.).

**HPLC** analysis: Chiralcel AD-3 (*n*-hexane/*i*-PrOH = 90/10, flow rate 0.5 mL/min,  $\lambda$  = 254 nm),  $t_R$  (minor) = 17.19 min,  $t_R$  (major) = 22.22 min.

**$^1\text{H}$  NMR** (400 MHz,  $\text{CDCl}_3$ )  $\delta$  9.20 (s, 1H), 8.08 (d,  $J$  = 7.5 Hz, 1H), 7.80 (d,  $J$  = 8.1 Hz, 1H), 7.69 – 7.57 (m, 6H), 7.46 (t,  $J$  = 7.9 Hz, 1H), 7.44 – 7.32 (m, 5H), 7.21 (s, 1H), 2.65 – 2.55 (m, 1H), 2.49 – 2.38 (m, 1H), 2.34 (s, 6H), 0.95 (t,  $J$  = 7.3 Hz, 3H).

**$^{13}\text{C}$  NMR** (100 MHz,  $\text{CDCl}_3$ )  $\delta$  192.2, 170.7, 138.6(8), 138.6(5), 136.9, 135.8, 134.1, 132.9, 128.6, 128.6, 128.0, 127.5, 127.2, 126.3, 125.8(8), 125.8(3), 125.4(two carbons overlap), 121.0, 120.1, 66.0, 32.4, 21.3, 9.6.

**HRMS** (ESI)  $m/z$  calcd. for  $\text{C}_{29}\text{H}_{28}\text{NO}_2\text{S}$  [ $\text{M} + \text{H}$ ] $^+$  454.1835, found: 454.1834.

**(*R*)-*S*-(1-(Naphthalen-1-ylamino)-1-oxo-2-phenylbutan-2-yl) thiophene-2-carbothioate (86)**

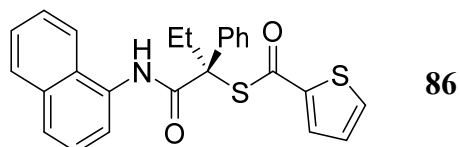

According to **General procedure D**, 2-chloro-*N*-(naphthalen-1-yl)-2-phenylbutanamide **E60** (32.4 mg, 0.10 mmol, 1.0 eq.) with potassium thiophene-2-carbothioate **S16** (27.3 mg, 0.15 mmol, 1.5 eq.). The reaction mixture was purified by column chromatography on silica gel (petroleum ether/EtOAc = 60/1 ~ 10/1) to yield the product **86** as a brown solid (42.8 mg, 99% yield, 96% e.e.).

**HPLC** analysis: Chiralcel OD-3 (*n*-hexane/*i*-PrOH = 95/15, flow rate 0.6 mL/min,  $\lambda$  = 254 nm),  $t_R$  (minor) = 25.66 min,  $t_R$  (major) = 28.32 min.

**$^1\text{H}$  NMR** (400 MHz,  $\text{CDCl}_3$ )  $\delta$  9.17 (s, 1H), 8.11 – 8.02 (m, 1H), 7.93 – 7.87 (m, 1H), 7.83 – 7.77 (m, 1H), 7.68 – 7.57 (m, 5H), 7.50 – 7.44 (m, 1H), 7.44 – 7.30 (m, 5H), 7.13 – 7.08 (m, 1H), 2.65 – 2.54 (m, 1H), 2.47 – 2.36 (m, 1H), 0.96 (t,  $J$  = 7.3 Hz, 3H).

**$^{13}\text{C}$  NMR** (100 MHz,  $\text{CDCl}_3$ )  $\delta$  183.8, 170.4, 141.5, 138.5, 134.1 (two carbon overlapped), 132.8, 132.3, 128.7, 128.6, 128.3, 128.1, 127.4, 127.3, 126.3, 125.9, 125.8, 125.5, 121.0, 120.2, 66.7, 32.5, 9.6.

**HRMS** (ESI)  $m/z$  calcd. for  $\text{C}_{25}\text{H}_{22}\text{NO}_2\text{S}$  [ $\text{M} + \text{H}$ ] $^+$  432.1086, found: 432.1081.

**(*R*)-*S*-(1-(Naphthalen-1-ylamino)-1-oxo-2-phenylbutan-2-yl) furan-2-carbothioate (87)**

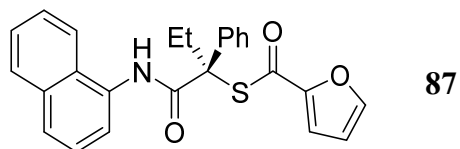

According to **General procedure D**, 2-chloro-*N*-(naphthalen-1-yl)-2-phenylbutanamide **E60** (32.4 mg, 0.10 mmol, 1.0 eq.) with potassium furan-2-carbothioate **S17** (25.0 mg, 0.15 mmol, 1.5 eq.). The reaction mixture was purified by column chromatography on silica gel (petroleum ether/EtOAc = 60/1 ~ 10/1) to yield the product **87** as a brown oil (41.2 mg, 99% yield, 92% e.e.).

**HPLC** analysis: Chiralcel IG (*n*-hexane/*i*-PrOH = 70/30, flow rate 1.0 mL/min,  $\lambda$  = 254 nm),  $t_R$  (minor) = 16.58 min,  $t_R$  (major) = 19.45 min.

<sup>1</sup>H NMR (400 MHz, CDCl<sub>3</sub>) δ 9.12 (s, 1H), 8.10 – 8.04 (m, 1H), 7.83 – 7.77 (m, 1H), 7.68 – 7.56 (m, 5H), 7.50 – 7.44 (m, 1H), 7.44 – 7.32 (m, 5H), 7.25 – 7.22 (m, 1H), 6.56 – 6.50 (m, 1H), 2.67 – 2.52 (m, 1H), 2.50 – 2.35 (m, 1H), 0.95 (t, *J* = 7.3 Hz, 3H).  
<sup>13</sup>C NMR (100 MHz, CDCl<sub>3</sub>) δ 180.1, 170.4, 150.4, 147.1, 138.5, 134.1, 132.8, 128.7, 128.6, 128.1, 127.4, 127.2, 126.3, 125.9, 125.8, 125.5, 120.9, 120.1, 117.2, 112.7, 66.1, 32.5, 9.6.

HRMS (ESI) *m/z* calcd. for C<sub>25</sub>H<sub>22</sub>NO<sub>3</sub>S [M + H]<sup>+</sup> 416.1315, found: 416.1303.

**(*R*)-*S*-(1-(Naphthalen-1-ylamino)-1-oxo-2-phenylbutan-2-yl) 2,2-dimethylpropanethioate (88)**

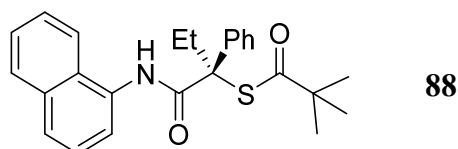

According to **General procedure D**, 2-chloro-*N*-(naphthalen-1-yl)-2-phenylbutanamide **E60** (32.4 mg, 0.10 mmol, 1.0 eq.) with potassium 2,2-dimethylpropanethioate **S18** (23.4 mg, 0.15 mmol, 1.5 eq.). The reaction mixture was purified by column chromatography on silica gel (petroleum ether/EtOAc = 60/1 ~ 10/1) to yield the product **88** as a yellow oil (40.2 mg, 99% yield, 90% e.e.).

**HPLC** analysis: Chiralcel IA (*n*-hexane/*i*-PrOH = 95/5, flow rate 1.0 mL/min, λ = 230 nm), *t<sub>R</sub>* (major) = 9.29 min, *t<sub>R</sub>* (minor) = 12.95 min.

<sup>1</sup>H NMR (400 MHz, CDCl<sub>3</sub>) δ 8.98 (s, 1H), 8.09 – 8.02 (m, 1H), 7.85 – 7.77 (m, 1H), 7.65 (d, *J* = 8.2 Hz, 1H), 7.64 – 7.59 (m, 1H), 7.56 – 7.51 (m, 2H), 7.51 – 7.42 (m, 2H), 7.41 – 7.30 (m, 4H), 2.56 – 2.44 (m, 1H), 2.37 – 2.25 (m, 1H), 1.28 (s, 9H), 0.88 (t, *J* = 7.3 Hz, 3H).

<sup>13</sup>C NMR (100 MHz, CDCl<sub>3</sub>) δ 206.9, 170.8, 138.8, 134.2, 133.0, 128.7, 128.6, 127.9, 127.3(3), 127.2(6), 126.2, 125.9(4), 125.9(1), 125.4, 121.0, 120.1, 65.2, 47.7, 32.3, 27.5, 9.5.

HRMS (ESI) *m/z* calcd. for C<sub>25</sub>H<sub>28</sub>NO<sub>2</sub>S [M + H]<sup>+</sup> 406.1835, found: 406.1824.

## 8. Investigation of other electrophiles

### Investigation of tertiary alkyl chlorides containing no N–H bond

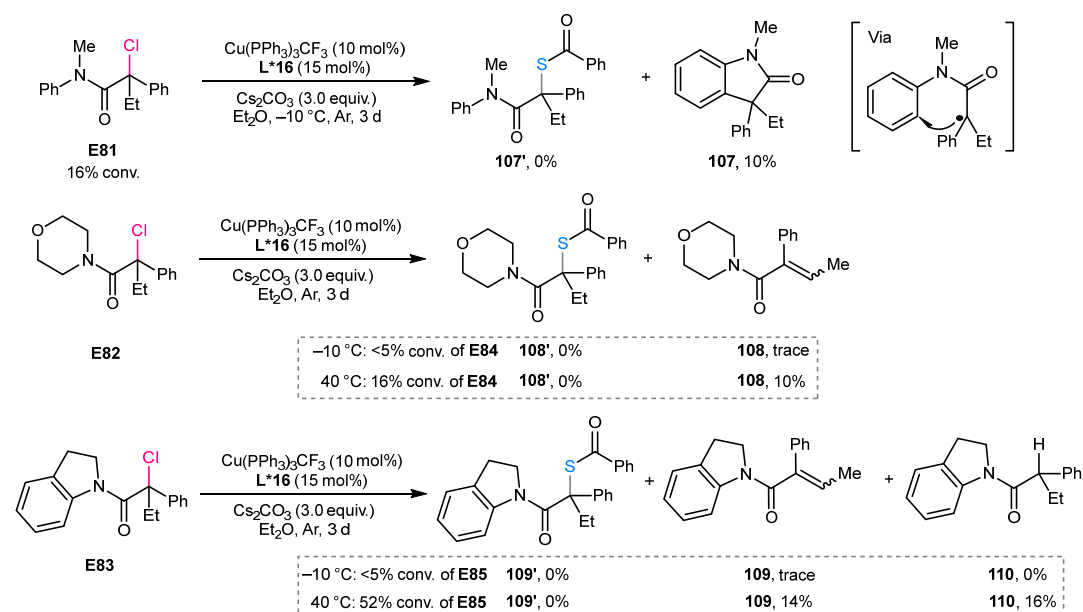

We examined the reaction of tertiary  $\alpha$ -carbonyl alkyl chlorides containing no N–H bond. Under the standard conditions, **E81** gave rise to the corresponding radical cyclization product **107** rather than C–S coupling product **107'**. Under the standard conditions, almost no conversion of **E82** was observed. Only 16% conversion of **E82** was observed at an elevated temperature ( $40^\circ\text{C}$ ), and the reaction afforded no desired product **108'** but elimination by-product **108** (10% yield). Under the standard conditions, no conversion of **E83** was observed as well. At  $40^\circ\text{C}$ , the reaction of **E83** afforded no desired product **109'**, but furnished the elimination by-product **109** and hydrogen atom abstraction by-product **110**. These results revealed that the N–H bond on tertiary  $\alpha$ -carbonyl alkyl chlorides is crucial in tuning reactivity and chemoselectivity.

### 3-Ethyl-1-methyl-3-phenylindolin-2-one (**107**)

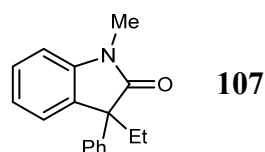

$^1\text{H NMR}$  (400 MHz,  $\text{CDCl}_3$ )  $\delta$  7.40 – 7.25 (m, 5H), 7.25 – 7.18 (m, 2H), 7.11 (t,  $J = 7.6$  Hz, 1H), 6.90 (d,  $J = 7.8$  Hz, 1H), 3.22 (s, 3H), 2.48 – 2.38 (m, 1H), 2.29 – 2.17 (m, 1H), 0.68 (t,  $J = 7.4$  Hz, 3H).

$^{13}\text{C NMR}$  (100 MHz,  $\text{CDCl}_3$ )  $\delta$  178.7, 144.2, 140.4, 132.2, 128.6, 128.2, 127.3, 127.1, 124.9, 122.7, 108.3, 57.5, 31.0, 26.4, 9.2.

Note: **107** is a known compound<sup>12</sup>.



### 1-Morpholino-2-phenylbut-2-en-1-one (108)

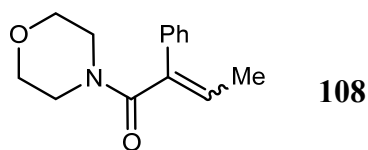

$^1\text{H NMR}$  (400 MHz,  $\text{CDCl}_3$ )  $\delta$  7.40 – 7.23 (m, 5H), 6.19 (q,  $J = 7.1$  Hz, 1H), 3.85 – 3.76 (m, 2H), 3.76 – 3.70 (m, 2H), 3.55 – 3.45 (m, 2H), 3.41 – 3.33 (m, 2H), 1.87 (d,  $J = 7.1$  Hz, 3H).

$^{13}\text{C NMR}$  (100 MHz,  $\text{CDCl}_3$ )  $\delta$  168.7, 137.5, 136.0, 128.9, 127.9, 125.3, 124.8, 67.0, 66.9, 46.8, 41.6, 15.6.

**HRMS** (ESI)  $m/z$  calcd for  $\text{C}_{14}\text{H}_{18}\text{NO}_2$   $[\text{M} + \text{H}]^+$  232.1332, found: 232.1327.

### 1-(Indolin-1-yl)-2-phenylbut-2-en-1-one (109)

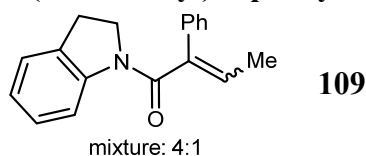

$^1\text{H NMR}$  (400 MHz,  $\text{CDCl}_3$ ) (major)  $\delta$  8.40 (d,  $J = 8.1$  Hz, 1H), 7.42 (d,  $J = 8.3$  Hz, 2H), 7.31 (t,  $J = 7.1$  Hz, 2H), 7.25 (t,  $J = 7.2$  Hz, 2H), 7.17 (d,  $J = 7.4$  Hz, 1H), 7.05 (t,  $J = 7.4$  Hz, 1H), 6.18 (q,  $J = 7.1$  Hz, 1H), 3.80 (t,  $J = 8.4$  Hz, 2H), 3.06 (t,  $J = 8.4$  Hz, 2H), 1.91 (d,  $J = 7.0$  Hz, 3H).

$^{13}\text{C NMR}$  (100 MHz,  $\text{CDCl}_3$ ) (major)  $\delta$  168.0, 142.6, 139.7, 135.8, 131.9, 128.9, 127.9, 127.7, 125.5, 124.8, 124.7, 124.3, 117.4, 48.5, 28.1, 15.6.

**HRMS** (ESI)  $m/z$  calcd for  $\text{C}_{18}\text{H}_{18}\text{NO}$   $[\text{M} + \text{H}]^+$  264.1383, found: 264.1386.

### 1-(indolin-1-yl)-2-phenylbutan-1-one (110)

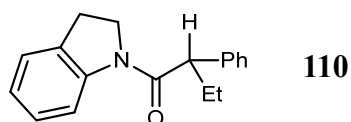

$^1\text{H NMR}$  (400 MHz,  $\text{CDCl}_3$ )  $\delta$  8.33 (d,  $J = 8.2$  Hz, 1H), 7.37 – 7.26 (m, 4H), 7.26 – 7.14 (m, 2H), 7.10 (d,  $J = 7.5$  Hz, 1H), 6.97 (t,  $J = 7.4$  Hz, 1H), 4.18 – 4.06 (m, 1H), 3.88 – 3.77 (m, 1H), 3.57 (t,  $J = 7.3$  Hz, 1H), 3.18 – 3.05 (m, 1H), 3.05 – 2.91 (m, 1H), 2.28 – 2.15 (m, 1H), 1.89 – 1.72 (m, 1H), 0.93 (t,  $J = 7.4$  Hz, 3H).

$^{13}\text{C NMR}$  (100 MHz,  $\text{CDCl}_3$ )  $\delta$  171.6, 143.4, 139.5, 131.2, 128.9, 128.2, 127.5, 127.1, 124.5, 123.7, 117.3, 54.0, 47.8, 28.1, 28.1, 12.6.

**HRMS** (ESI)  $m/z$  calcd for  $\text{C}_{18}\text{H}_{19}\text{NNaO}$   $[\text{M} + \text{Na}]^+$  288.1359, found: 288.1361.

## Investigation of other secondary alkyl bromides

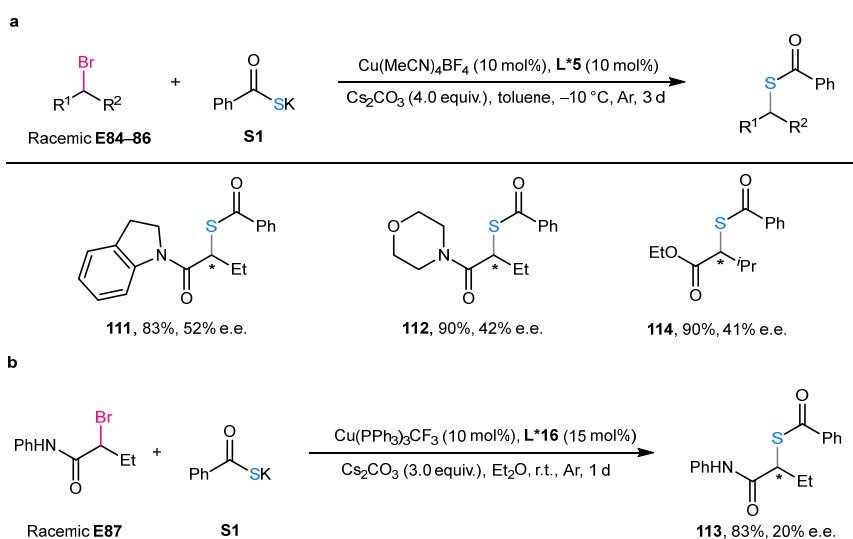

### S-(1-(Indolin-1-yl)-1-oxobutan-2-yl) benzothioate (**111**)

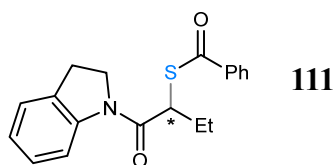

**HPLC** analysis: Chiralcel AD-H (*n*-Hexane/*i*-PrOH = 90/10, flow rate 0.8 mL/min,  $\lambda$  = 254 nm),  $t_R$  (minor) = 14.81 min,  $t_R$  (major) = 19.04 min.

**<sup>1</sup>H NMR** (400 MHz, CDCl<sub>3</sub>)  $\delta$  8.27 (d,  $J$  = 8.0 Hz, 1H), 8.03 – 7.84 (m, 2H), 7.64 – 7.52 (m, 1H), 7.52 – 7.37 (m, 2H), 7.24 – 7.14 (m, 2H), 7.07 – 7.00 (m, 1H), 4.62 (t,  $J$  = 7.4 Hz, 1H), 4.43 – 4.30 (m, 1H), 4.28 – 4.14 (m, 1H), 3.22 (t,  $J$  = 8.5 Hz, 2H), 2.30 – 2.14 (m, 1H), 2.01 – 1.85 (m, 1H), 1.09 (t,  $J$  = 7.4 Hz, 3H).

**<sup>13</sup>C NMR** (100 MHz, CDCl<sub>3</sub>)  $\delta$  191.2, 169.1, 143.0, 136.4, 134.0, 131.8, 128.9, 127.7, 127.6, 124.7, 124.3, 117.6, 48.3, 47.4, 28.2, 26.4, 12.0.

**HRMS** (ESI)  $m/z$  calcd. for C<sub>19</sub>H<sub>20</sub>NO<sub>2</sub>S [M + H]<sup>+</sup> 326.1209, found: 326.1208.

### S-(1-Morpholino-1-oxobutan-2-yl) benzothioate (**112**)

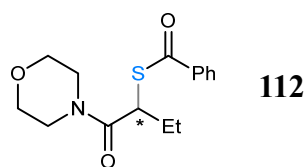

**HPLC** analysis: Chiralcel AD-H (*n*-Hexane/*i*-PrOH = 85/15, flow rate 0.8 mL/min,  $\lambda$  = 214 nm),  $t_R$  (minor) = 10.21 min,  $t_R$  (major) = 11.33 min.

**<sup>1</sup>H NMR** (400 MHz, CDCl<sub>3</sub>)  $\delta$  8.00 – 7.81 (m, 2H), 7.66 – 7.54 (m, 1H), 7.51 – 7.38 (m, 2H), 4.64 (t,  $J$  = 7.3 Hz, 1H), 3.77 – 3.55 (m, 8H), 2.19 – 2.03 (m, 1H), 1.94 – 1.80 (m, 1H), 1.03 (t,  $J$  = 7.3 Hz, 3H).

**<sup>13</sup>C NMR** (100 MHz, CDCl<sub>3</sub>)  $\delta$  191.1, 169.8, 136.3, 134.0, 128.9, 127.5, 67.0, 66.9, 46.7, 43.8, 42.9, 26.4, 11.9.

HRMS (ESI)  $m/z$  calcd. for  $C_{15}H_{20}NO_3S$   $[M + H]^+$  294.1158, found: 294.1156.

**S-(1-Oxo-1-(phenylamino)butan-2-yl) benzothioate (113)**

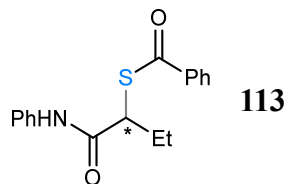

HPLC analysis: Chiralcel AD-H (*n*-Hexane/*i*-PrOH = 85/15, flow rate 0.8 mL/min,  $\lambda$  = 254 nm),  $t_R$  (minor) = 12.83 min,  $t_R$  (major) = 15.56 min.

$^1H$  NMR (400 MHz,  $CDCl_3$ )  $\delta$  8.33 (s, 1H), 8.01 – 7.93 (m, 2H), 7.65 – 7.58 (m, 1H), 7.58 – 7.51 (m, 2H), 7.51 – 7.43 (m, 2H), 7.34 – 7.27 (m, 2H), 7.12 – 7.06 (m, 1H), 4.20 (t,  $J$  = 7.6 Hz, 1H), 2.34 – 2.16 (m, 1H), 1.96 – 1.83 (m, 1H), 1.12 (t,  $J$  = 7.3 Hz, 3H).

$^{13}C$  NMR (100 MHz,  $CDCl_3$ )  $\delta$  193.6, 169.1, 138.0, 136.3, 134.3, 129.1, 129.0, 127.6, 124.5, 119.9, 48.5, 23.4, 12.3.

HRMS (ESI)  $m/z$  calcd. for  $C_{17}H_{18}NO_2S$   $[M + H]^+$  300.1053, found: 300.1054.

**Ethyl 2-(benzoylthio)-3-methylbutanoate (114)**

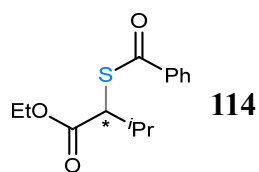

HPLC analysis: Chiralcel AD-H (*n*-Hexane/*i*-PrOH = 99/1, flow rate 0.8 mL/min,  $\lambda$  = 254 nm),  $t_R$  (minor) = 11.09 min,  $t_R$  (major) = 14.57 min.

$^1H$  NMR (400 MHz,  $CDCl_3$ )  $\delta$  8.01 – 7.93 (m, 2H), 7.61 – 7.54 (m, 1H), 7.50 – 7.41 (m, 2H), 4.34 (d,  $J$  = 6.6 Hz, 1H), 4.27 – 4.18 (m, 2H), 2.42 – 2.28 (m, 1H), 1.29 (t,  $J$  = 7.1 Hz, 3H), 1.07 (dd,  $J$  = 6.8, 5.7 Hz, 6H).

$^{13}C$  NMR (100 MHz,  $CDCl_3$ )  $\delta$  190.5, 171.5, 136.7, 133.8, 128.8, 127.6, 61.6, 53.4, 30.9, 20.5, 19.9, 14.3.

HRMS (ESI)  $m/z$  calcd. for  $C_{14}H_{19}O_3S$   $[M + H]^+$  267.1049, found: 267.1050.

## 9. Procedure for synthetic applications (89–102)

### The synthesis of 89

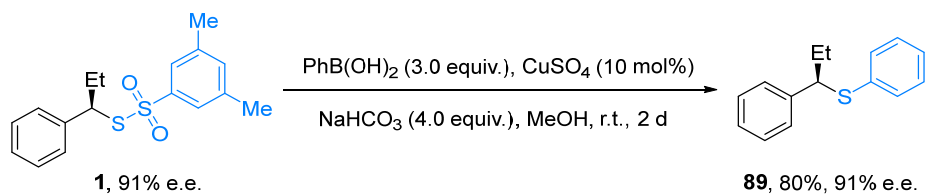

To a mixture of copper(II) sulfate (16.0 mg, 0.1 mmol, 10 mol%) and sodium bicarbonate (336.0 mg, 4.0 mmol, 4.0 equiv.) was added a solution of corresponding thiosulfonates **1** (320.5 mg, 1.0 mmol, 1.0 equiv.) and phenylboronic acid (366.0 mg, 3.0 mmol, 3.0 equiv.) dissolved in methanol (5.0 mL) at room temperature. After stirring for 48 hours at the same temperature, the mixture was passed through a short pad of silica gel with EtOAc and then concentrated under reduced pressure. The residue was purified by column chromatography on silica gel (petroleum ether /EtOAc = 100/1 ~ 20/1) to give product **89** (183.3 mg, 80%, 91% e.e.) as a white solid.

### (*R*)-Phenyl(1-phenylpropyl)sulfane (**89**)

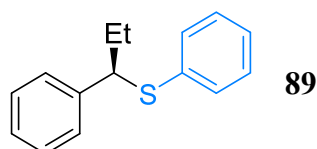

**HPLC** analysis: Chiralcel OJ-H (*n*-Hexane/*i*-PrOH = 95/5, flow rate 1.0 mL/min,  $\lambda$  = 254 nm),  $t_R$  (minor) = 8.68 min,  $t_R$  (major) = 13.98 min.

**<sup>1</sup>H NMR** (400 MHz,  $\text{CDCl}_3$ )  $\delta$  7.29 – 7.22 (m, 6H), 7.22 – 7.15 (m, 4H), 4.05 (dd,  $J$  = 8.8, 6.0 Hz, 1H), 2.07 – 1.86 (m, 2H), 0.92 (t,  $J$  = 7.4 Hz, 3H).

**<sup>13</sup>C NMR** (100 MHz,  $\text{CDCl}_3$ )  $\delta$  142.1, 135.3, 132.4, 128.7, 128.4, 128.0, 127.2, 127.0, 55.4, 29.5, 12.4.

**HRMS** (ESI)  $m/z$  calcd for  $\text{C}_{15}\text{H}_{17}\text{S}$  [ $\text{M} + \text{H}$ ]<sup>+</sup> 229.1045, found: 229.1042.

### The synthesis of 90 or 91

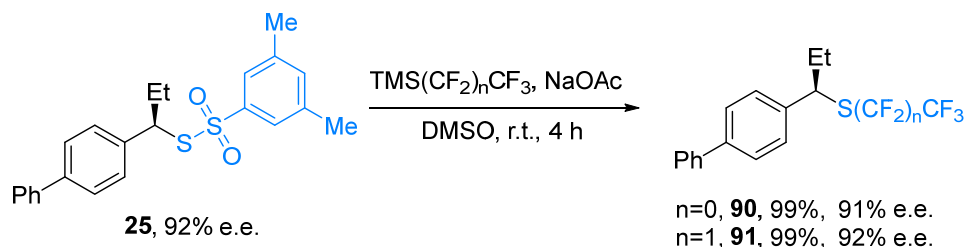

An oven-dried Schlenk tube was sequentially charged with the corresponding thiosulfonates **25** (79.3 mg, 0.2 mmol, 1.0 equiv) and NaOAc (49.2 mg, 0.6 mmol, 3.0 equiv). Anhydrous DMSO (1.0 mL) was then added followed by dropwise addition of  $\text{TMS}(\text{CF}_2)_n\text{CF}_3$  ( $n = 0$  or  $1$ ) (3.0 equiv) with stirring. Then the reaction was stirred at room temperature for 4 hours. After the reaction was completed, it was diluted with DCM. The organic layer was washed with water (three times) and brine, then dried over

anhydrous Na<sub>2</sub>SO<sub>4</sub>. After filtration, the filtrate was concentrated under reduced pressure. The residue was purified by flash chromatography on silica gel to afford the corresponding perfluoroalkyl sulfides **90** or **91**.

**(R)**-(1-([1,1'-Biphenyl]-4-yl)propyl)(trifluoromethyl)sulfane (**90**)

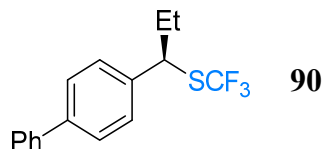

**25** with Me<sub>3</sub>SiCF<sub>3</sub> (88.8 μL, 0.6 mmol, 3.0 eq.). The reaction mixture was purified by column chromatography on silica gel (petroleum ether) to yield the product **90** as a light yellow solid (58.7 mg, 99% yield, 91% e.e.).

**HPLC** analysis: Chiralcel OD-H (*n*-Hexane/*i*-PrOH = 100/0, flow rate 1.0 mL/min, λ = 254 nm), *t<sub>R</sub>* (major) = 10.55 min, *t<sub>R</sub>* (minor) = 17.61 min.

**<sup>1</sup>H NMR** (400 MHz, CDCl<sub>3</sub>) δ 7.61 – 7.53 (m, 4H), 7.46 – 7.39 (m, 2H), 7.38 – 7.30 (m, 3H), 4.24 (dd, *J* = 8.8, 6.4 Hz, 1H), 2.14 – 1.91 (m, 2H), 0.94 (t, *J* = 7.3 Hz, 3H).

**<sup>13</sup>C NMR** (100 MHz, CDCl<sub>3</sub>) δ 140.9, 140.6, 139.6, 130.8 (q, *J* = 307.2 Hz), 128.9, 128.0, 127.6, 127.5, 127.2, 51.2 (d, *J* = 1.7 Hz), 30.0, 12.1.

**<sup>19</sup>F NMR** (376 MHz, CDCl<sub>3</sub>) δ –39.66.

**HRMS** (ESI) *m/z* calcd for C<sub>16</sub>H<sub>16</sub>F<sub>3</sub>S [M + H]<sup>+</sup> 297.0919, found: 297.0933.

**(R)**-(1-([1,1'-Biphenyl]-4-yl)propyl)(perfluoroethyl)sulfane (**91**)

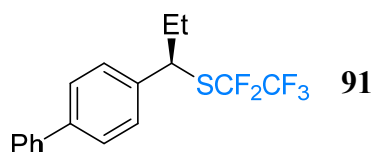

**25** with Me<sub>3</sub>SiCF<sub>2</sub>CF<sub>3</sub> (105.2 μL, 0.6 mmol, 3.0 eq.). The reaction mixture was purified by column chromatography on silica gel (petroleum ether) to yield the product **91** as a white solid (68.6 mg, 99% yield, 92% e.e.).

**HPLC** analysis: Chiralcel OD-H (*n*-Hexane/*i*-PrOH = 100/0, flow rate 1.0 mL/min, λ = 254 nm), *t<sub>R</sub>* (major) = 9.60 min, *t<sub>R</sub>* (minor) = 15.65 min.

**<sup>1</sup>H NMR** (400 MHz, CDCl<sub>3</sub>) δ 7.61 – 7.53 (m, 4H), 7.46 – 7.39 (m, 2H), 7.38 – 7.30 (m, 3H), 4.34 (dd, *J* = 8.8, 6.5 Hz, 1H), 2.17 – 1.96 (m, 2H), 0.95 (t, *J* = 7.3 Hz, 3H).

**<sup>13</sup>C NMR** (100 MHz, CDCl<sub>3</sub>) δ 140.9, 140.6, 139.8, 128.9, 128.0(4), 127.5(9), 127.5(8), 127.2, 122.0 (tq, *J* = 40.6 Hz), 118.7 (qt, *J* = 36.4 Hz), 50.1 (t, *J* = 2.6 Hz), 30.7, 12.1.

**<sup>19</sup>F NMR** (376 MHz, CDCl<sub>3</sub>) δ –83.41 (t, *J* = 3.9 Hz, 3F), –90.31 (q, *J* = 3.8 Hz, 1F), –90.45 (q, *J* = 4.0 Hz, 1F).

**HRMS** (ESI) *m/z* calcd for C<sub>17</sub>H<sub>16</sub>F<sub>5</sub>S [M + H]<sup>+</sup> 347.0887, found: 347.0882.

## The synthesis of **92**

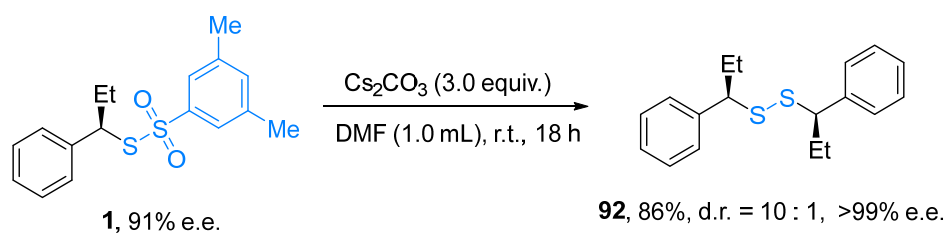

An oven-dried Schlenk tube was sequentially charged with the corresponding thiosulfonates **1** (64.1 mg, 0.2 mmol, 1.0 equiv) and Cs<sub>2</sub>CO<sub>3</sub> (195.6 mg, 0.6 mmol, 3.0 equiv). Anhydrous DMF (1.0 mL) was then added, then the reaction was stirred at room temperature for 18 hours. After the reaction was completed, it was diluted with DCM. The organic layer was washed with water (three times) and brine, then dried over anhydrous Na<sub>2</sub>SO<sub>4</sub>. After filtration, the filtrate was concentrated under reduced pressure. The residue was purified by flash chromatography on silica gel (petroleum ether) to afford the product **92** (52.0 mg, 86%, d.r. = 10:1, >99% e.e.) as a light yellow solid. The diastereomeric ratio was determined by crude <sup>1</sup>H NMR spectroscopy.

## 1,2-Bis((*R*)-1-phenylpropyl)disulfane (**92**)

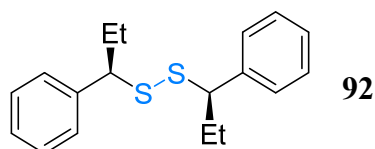

**HPLC** analysis: Chiralcel OJ-3 (*n*-Hexane/*i*-PrOH = 95/5, flow rate 0.8 mL/min, λ = 214 nm), *t*<sub>R</sub> (minor) = 6.64 min, *t*<sub>R</sub> (major) = 8.82 min, *t*<sub>R</sub> (meso) = 10.14 min.

**<sup>1</sup>H NMR** (400 MHz, CDCl<sub>3</sub>) δ 7.34 – 7.25 (m, 6H + 6H × 0.1), 7.19 – 7.12 (m, 4H + 4H × 0.1), 3.23 (dd, *J* = 9.1, 6.1 Hz, 2H × 0.1) 3.16 (dd, *J* = 9.6, 5.6 Hz, 2H), 2.09 – 1.98 (m, 2H), 1.97 – 1.91 (m, 2H × 0.1), 1.78 (m, 2H + 2H × 0.1), 0.81 – 0.71 (m, 6H + 6H × 0.1).

**<sup>13</sup>C NMR** (100 MHz, CDCl<sub>3</sub>) δ 141.4, 128.5 (two carbon overlapped), 127.5, 57.0, 27.8, 12.3.

**HRMS** (ESI) *m/z* calcd for C<sub>18</sub>H<sub>23</sub>S<sub>2</sub> [M + H]<sup>+</sup> 303.1236, found: 303.1227.

## The synthesis of **93**

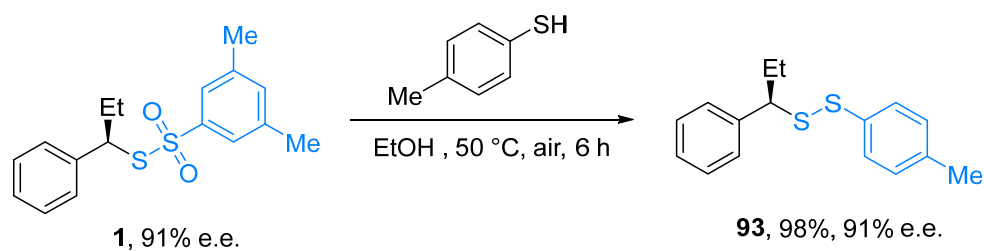

A mixture of corresponding thiosulfonates **1** (64.1 mg, 0.2 mmol, 1.0 equiv.) and 4-methylphenylthiol (24.8 mg, 0.2 mmol, 1.0 equiv.) in EtOH (1.0 mL) was stirred at 50 °C for 6 hours in air. After the residue was dissolved in Et<sub>2</sub>O, the solution was

washed with brine and dried over anhydrous Na<sub>2</sub>SO<sub>4</sub>. After filtration, the filtrate was concentrated under reduced pressure. The residue was purified by flash chromatography on silica gel (petroleum ether) to afford the product **93** (53.8 mg, 98%, 91% e.e.) as white solid.

### (*R*)-1-(1-Phenylpropyl)-2-(*p*-tolyl)disulfane (**93**)

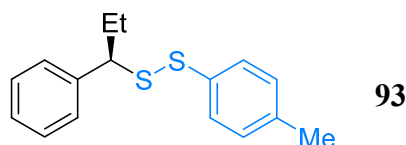

**HPLC** analysis: Chiralcel OJ (*n*-Hexane/*i*-PrOH = 95/5, flow rate 0.8 mL/min,  $\lambda$  = 214 nm),  $t_R$  (minor) = 15.54 min,  $t_R$  (major) = 19.50 min.

**<sup>1</sup>H NMR** (400 MHz, CDCl<sub>3</sub>)  $\delta$  7.31 – 7.25 (m, 4H), 7.25 – 7.20 (m, 3H), 7.05 (d,  $J$  = 8.1 Hz, 2H), 3.79 (dd,  $J$  = 9.6, 5.6 Hz, 1H), 2.31 (s, 3H), 2.20 – 2.09 (m, 1H), 1.98 – 1.85 (m, 1H), 0.86 (t,  $J$  = 7.3 Hz, 3H).

**<sup>13</sup>C NMR** (100 MHz, CDCl<sub>3</sub>)  $\delta$  140.5, 136.9, 134.3, 129.7, 128.6, 128.4, 128.3, 127.6, 57.7, 28.0, 21.1, 12.4.

**HRMS** (ESI)  $m/z$  calcd for C<sub>16</sub>H<sub>19</sub>S<sub>2</sub> [M + H]<sup>+</sup> 275.0923, found: 275.0918.

### The synthesis of **94**

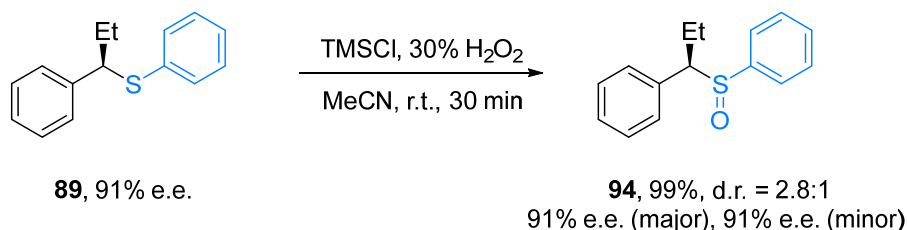

In a round bottomed flask (10 mL) equipped with a stir bar, a solution of **89** (45.7 mg, 0.20 mmol, 1.0 equiv.) in CH<sub>3</sub>CN (1.0 mL) was prepared, the solution was cooled to 0 °C. Aqueous 30% H<sub>2</sub>O<sub>2</sub> (40.0  $\mu$ L, 0.4 mmol, 2.0 equiv.) and Me<sub>3</sub>SiCl (17.6  $\mu$ L, 0.20 mmol, 1.0 equiv.) were added and the mixture was stirred at room temperature for 30 min. After disappearance of the sulfide, the reaction mixture was quenched by adding H<sub>2</sub>O (10 mL), extracted with EtOAc (3  $\times$  5 mL). The organic layer was dried over Na<sub>2</sub>SO<sub>4</sub>, filtered, and concentrated. The residue was purified by column chromatography on silica gel (petroleum ether /EtOAc = 20/1 ~ 3/1) to afford the product **94** (48.4 mg, 99%, d.r. = 2.8:1, 91% e.e. (major), 91% e.e. (minor)) as a white solid. The diastereomeric ratio was determined by crude <sup>1</sup>H NMR spectroscopy.

### ((*R*)-1-Phenylpropyl)sulfinylbenzene (**94**)

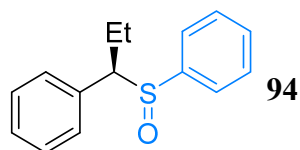

**HPLC** analysis: Chiralcel OD-H (*n*-Hexane/*i*-PrOH = 95/5, flow rate 0.6 mL/min,  $\lambda$  =

214 nm),  $t_R$  (minor1) = 17.38 min,  $t_R$  (major2) = 18.84 min,  $t_R$  (minor2) = 20.04 min,  $t_R$  (major1) = 26.49 min.

$^1\text{H NMR}$  (400 MHz,  $\text{CDCl}_3$ )  $\delta$  7.41 – 7.32 (m, 1H + 1H  $\times$  0.36), 7.32 – 7.13 (m, 7H + 5H  $\times$  0.36), 7.11 – 7.07 (m, 2H  $\times$  0.36), 6.94 – 6.88 (m, 2H), 6.88 – 6.84 (m, 2H  $\times$  0.36), 3.57 (m, 1H + 1H  $\times$  0.36), 2.50 – 2.39 (m, 1H), 2.39 – 2.29 (m, 1H  $\times$  0.36), 2.12 – 2.00 (m, 1H), 2.00 – 1.92 (m, 1H  $\times$  0.36), 1.03 (t,  $J$  = 7.4 Hz, 3H  $\times$  0.36), 0.90 (t,  $J$  = 7.4 Hz, 3H).

$^{13}\text{C NMR}$  (100 MHz,  $\text{CDCl}_3$ ), (major),  $\delta$  142.3, 133.6, 131.0, 129.3, 128.5(3), 128.4(6), 128.0, 125.0, 75.0, 22.4, 11.6.

$^{13}\text{C NMR}$  (100 MHz,  $\text{CDCl}_3$ ), (minor),  $\delta$  141.3, 132.2, 130.7, 129.4, 128.4, 128.3, 128.1, 124.8, 72.2, 21.4, 12.1.

**HRMS** (ESI)  $m/z$  calcd for  $\text{C}_{15}\text{H}_{17}\text{OS}$   $[\text{M} + \text{H}]^+$  245.0995, found: 245.0989.

### The synthesis of **95**

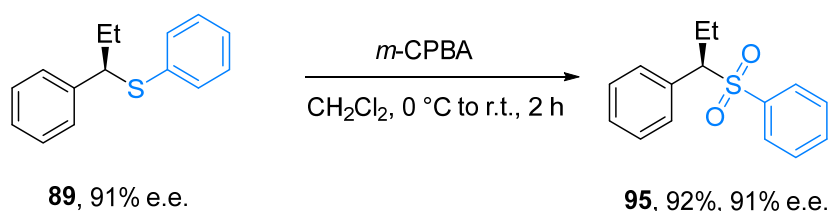

In a round-bottomed flask (10 mL) equipped with a stir bar, a solution of **89** (45.7 mg, 0.20 mmol, 1.0 equiv.) in  $\text{CH}_2\text{Cl}_2$  (0.8 mL) was prepared. The solution was cooled to 0 °C. A solution of *m*-CPBA (purity: 85%, 162.4 mg, 0.8 mmol, 4.0 equiv.) in  $\text{CH}_2\text{Cl}_2$  (4.0 mL) was added dropwise and the mixture was stirred at room temperature for 2 hours. After disappearance of the sulfide, the reaction mixture was quenched by adding  $\text{H}_2\text{O}$  (10 mL), extracted with  $\text{EtOAc}$  (3  $\times$  5 mL). The organic layer was dried over  $\text{Na}_2\text{SO}_4$ , filtered, and concentrated. The residue was purified by column chromatography on silica gel (petroleum ether / $\text{EtOAc}$  = 20/1 ~ 3/1) to afford the product **95** (47.9 mg, 92%, 91% e.e.) as a white solid.

### (*R*)-((1-Phenylpropyl)sulfonyl)benzene (**95**)

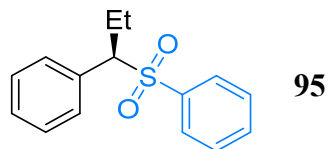

**HPLC** analysis: Chiralcel OD-H (*n*-Hexane/*i*-PrOH = 90/10, flow rate 1.0 mL/min,  $\lambda$  = 214 nm),  $t_R$  (minor) = 7.96 min,  $t_R$  (major) = 9.88 min.

$^1\text{H NMR}$  (400 MHz,  $\text{CDCl}_3$ )  $\delta$  7.57 – 7.48 (m, 3H), 7.36 (t,  $J$  = 7.7 Hz, 2H), 7.30 – 7.19 (m, 3H), 7.09 (d,  $J$  = 7.4 Hz, 2H), 3.96 (dd,  $J$  = 11.5, 3.7 Hz, 1H), 2.56 – 2.41 (m, 1H), 2.24 – 2.08 (m, 1H), 0.87 (t,  $J$  = 7.4 Hz, 3H).

$^{13}\text{C NMR}$  (100 MHz,  $\text{CDCl}_3$ )  $\delta$  137.5, 133.5, 132.2, 130.0, 129.1, 128.8, 128.7, 128.5, 73.2, 21.0, 11.6.

**HRMS** (ESI)  $m/z$  calcd for  $\text{C}_{15}\text{H}_{17}\text{O}_2\text{S}$   $[\text{M} + \text{H}]^+$  261.0944, found: 261.0938.



## The synthesis of **96**

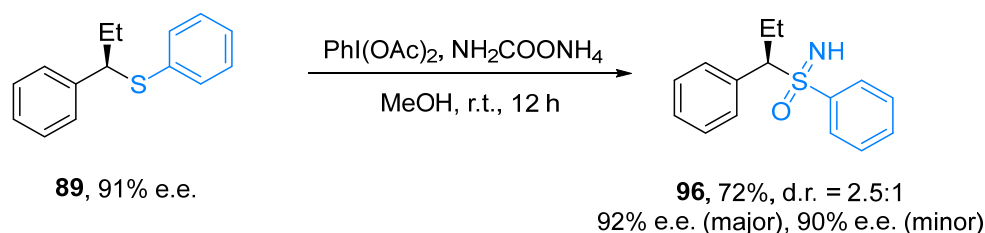

The sulfide **89** (45.7 mg, 0.20 mmol, 1.0 equiv.), (diacetoxyiodo)benzene (193.2 mg, 0.60 mmol, 3.0 equiv.) and ammonium carbamate (46.8 mg, 0.60 mmol, 3.0 equiv.) were added to a flask containing a stirrer bar. MeOH (1.0 mL) was added and the reaction was stirred at room temperature for 12 h. After disappearance of the sulfide, the reaction mixture was quenched by adding H<sub>2</sub>O (10 mL), extracted with EtOAc (3 × 5 mL). The organic layer was dried over Na<sub>2</sub>SO<sub>4</sub>, filtered, and concentrated. The residue was purified by column chromatography on silica gel (petroleum ether /EtOAc = 20/1 ~ 3/1) to afford the product **96** (37.3 mg, 72%, d.r. = 2.5:1, 92% e.e. (major), 90% e.e. (minor)) as a light yellow solid. The diastereomeric ratio was determined by crude <sup>1</sup>H NMR spectroscopy.

### Imino(phenyl)((*R*)-1-phenylpropyl)-λ<sup>6</sup>-sulfanone (**96**)

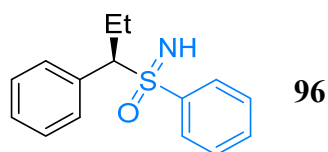

**HPLC** analysis: Chiralcel OJ (*n*-Hexane/*i*-PrOH = 80/20, flow rate 0.8 mL/min, λ = 214 nm), *t<sub>R</sub>* (minor1) = 13.43 min, *t<sub>R</sub>* (minor2) = 15.97 min, *t<sub>R</sub>* (major2) = 18.22 min, *t<sub>R</sub>* (major1) = 37.84 min.

**<sup>1</sup>H NMR** (400 MHz, CDCl<sub>3</sub>) δ 7.81 – 7.77 (m, 2H), 7.68 – 7.63 (m, 2H × 0.4), 7.59 – 7.54 (m, 1H), 7.52 – 7.48 (m, 1H × 0.4), 7.48 – 7.42 (m, 2H), 7.39 – 7.34 (m, 1H), 7.34 – 7.28 (m, 2H + 3H × 0.4), 7.26 – 7.20 (m, 2H + 2H × 0.4), 7.14 – 7.07 (m, 2H × 0.4), 4.04 (dd, *J* = 11.9, 3.6 Hz, 1H × 0.4), 3.92 (dd, *J* = 11.0, 4.3 Hz, 1H), 2.69 (s, 1H + 1H × 0.4), 2.51 – 2.39 (m, 1H × 0.4), 2.25 – 2.10 (m, 2H + 1H × 0.4), 0.82 (t, *J* = 7.4 Hz, 3H × 0.4), 0.78 (t, *J* = 7.4 Hz, 3H).

**<sup>13</sup>C NMR** (100 MHz, CDCl<sub>3</sub>) (major), δ 139.3, 133.0, 132.0, 130.3, 129.4, 128.9, 128.6(0), 128.5(8), 75.2, 22.4, 11.6(5).

**<sup>13</sup>C NMR** (100 MHz, CDCl<sub>3</sub>) (minor), δ 139.9, 132.8, 132.4, 130.2, 129.3, 129.0, 128.7, 128.4, 74.4, 21.2, 11.5(9).

**HRMS** (ESI) *m/z* calcd for C<sub>15</sub>H<sub>18</sub>ONS [M + H]<sup>+</sup> 260.1104, found: 260.1096.

## The synthesis of **97**

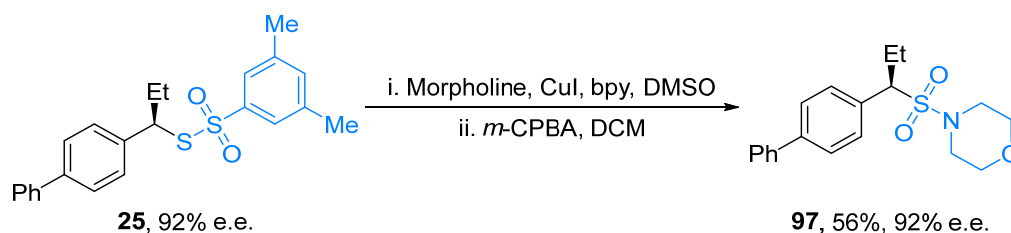

A mixture of corresponding thiosulfonates **25** (79.3 mg, 0.2 mmol, 1.0 equiv.), morpholine (35.0  $\mu$ L, 0.4 mmol, 2.0 equiv.), CuI (5.73 mg, 0.03 mmol, 10 mol%) and 2,2'-bipyridine (bpy, 4.68 mg, 0.03 mmol, 10 mol%) in DMSO (1.0 mL) was stirred at 60 °C for 19 hours in air. After the residue was dissolved in Et<sub>2</sub>O, the solution was washed with brine and dried over anhydrous Na<sub>2</sub>SO<sub>4</sub>, filtered, and concentrated to afford the corresponding sulfenamides, which was directly used in the next step without further purification.

In a round-bottomed flask (10 mL) equipped with a stir bar, a solution of the crude sulfenamides obtained above in CH<sub>2</sub>Cl<sub>2</sub> (0.6 mL) was prepared. The solution was cooled to 0 °C. A solution of *m*-CPBA (purity: 85%, 121.8 mg, 0.6 mmol, 3.0 equiv.) in CH<sub>2</sub>Cl<sub>2</sub> (3.0 mL) was added dropwise and the mixture was stirred at room temperature for 3 hours. After disappearance of the sulfenamides, the reaction mixture was quenched by adding H<sub>2</sub>O (10 mL), extracted with EtOAc (3  $\times$  5 mL). The organic layer was dried over Na<sub>2</sub>SO<sub>4</sub>, filtered, and concentrated. The residue was purified by column chromatography on silica gel (petroleum ether /EtOAc = 20/1 ~ 3/1) to afford the product **97** (38.7 mg, 56% for 2 steps, 92% e.e.) as a white solid.

### (*R*)-4-((1-([1,1'-Biphenyl]-4-yl)propyl)sulfonyl)morpholine (**97**)

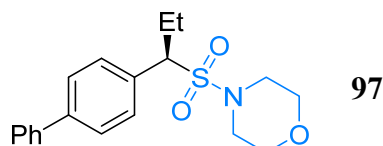

**HPLC** analysis: Chiralcel OD-H (*n*-Hexane/*i*-PrOH = 80/20, flow rate 0.8 mL/min,  $\lambda$  = 254 nm),  $t_R$  (minor) = 10.04 min,  $t_R$  (major) = 11.55 min.

**<sup>1</sup>H NMR** (400 MHz, CDCl<sub>3</sub>)  $\delta$  7.67 – 7.59 (m, 4H), 7.51 – 7.43 (m, 4H), 7.40 – 7.35 (m, 1H), 4.00 (dd,  $J$  = 11.2, 3.9 Hz, 1H), 3.60 – 3.52 (m, 2H), 3.52 – 3.45 (m, 2H), 3.14 – 3.05 (m, 2H), 2.89 – 2.78 (m, 2H), 2.50 – 2.38 (m, 1H), 2.25 – 2.11 (m, 1H), 0.90 (t,  $J$  = 7.4 Hz, 3H).

**<sup>13</sup>C NMR** (100 MHz, CDCl<sub>3</sub>)  $\delta$  141.9, 140.1, 132.1, 130.1, 129.0, 127.9, 127.5, 127.1, 69.7, 66.9, 46.3, 23.5, 11.5.

**HRMS** (ESI) calcd for C<sub>19</sub>H<sub>23</sub>NNaO<sub>3</sub>S [M + Na]<sup>+</sup> 368.1291, found: 368.1280.

## The synthesis of 98

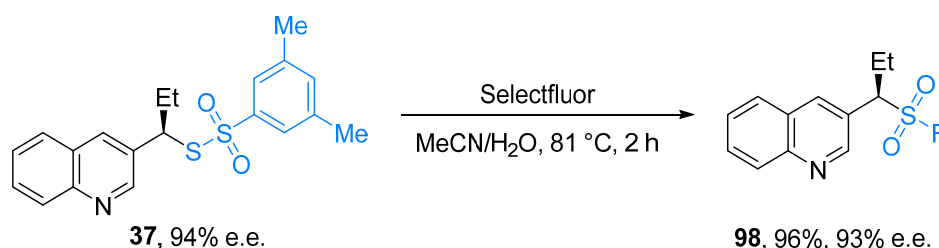

To a stirred solution of thiosulfonate **37** (37.2 mg, 0.1 mmol, 1.0 equiv.) in acetonitrile (1.0 mL) and water (0.1 mL), Selectfluor (159.5 mg, 0.45 mmol, 4.5 equiv.) was added and the resulting mixture was heated at 81 °C for 2 hours. The reaction was monitored via TLC. After the thiosulfonate disappeared from the TLC, water (10 mL) was added and the resulting mixture was extracted with EtOAc (3 × 5 mL). The extract was washed with brine, dried over anhydrous Na<sub>2</sub>SO<sub>4</sub>, filtered, and concentrated. The residue was purified by column chromatography on silica gel (petroleum ether /EtOAc = 10/1 ~ 4/1) to afford the product **98** (24.2 mg, 96%, 93% e.e.) as a yellow oil.

## (R)-1-(Quinolin-3-yl)propane-1-sulfonyl fluoride (98)

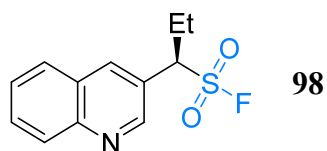

**HPLC** analysis: Chiralcel OD-H (*n*-Hexane/*i*-PrOH = 95/5, flow rate 0.5 mL/min,  $\lambda$  = 214 nm),  $t_R$  (major) = 34.80 min,  $t_R$  (minor) = 37.90 min.

**<sup>1</sup>H NMR** (400 MHz, CDCl<sub>3</sub>)  $\delta$  8.91 (d,  $J$  = 2.4 Hz, 1H), 8.28 (d,  $J$  = 2.3 Hz, 1H), 8.16 (d,  $J$  = 8.5 Hz, 1H), 7.91 – 7.84 (m, 1H), 7.85 – 7.75 (m, 1H), 7.67 – 7.58 (m, 1H), 4.60 (dd,  $J$  = 10.7, 4.6 Hz, 1H), 2.71 – 2.56 (m, 1H), 2.50 – 2.34 (m, 1H), 1.02 (t,  $J$  = 7.4 Hz, 3H).

**<sup>13</sup>C NMR** (100 MHz, CDCl<sub>3</sub>)  $\delta$  150.6, 148.7, 137.0, 131.0, 129.5, 128.2, 127.8, 127.6, 123.4, 67.4 (d,  $J$  = 13.3 Hz), 23.6, 11.3.

**<sup>19</sup>F NMR** (376 MHz, CDCl<sub>3</sub>)  $\delta$  46.44.

**HRMS** (ESI) calcd for C<sub>12</sub>H<sub>13</sub>O<sub>2</sub>NFS [M + H]<sup>+</sup> 254.0646, found: 254.0639.

## The synthesis of 99

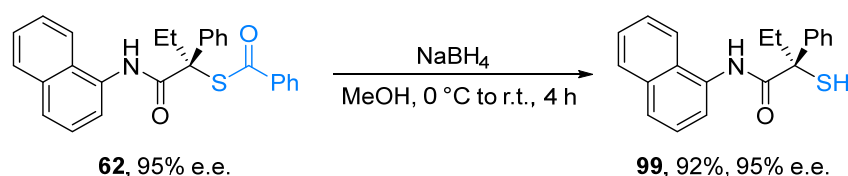

In a round-bottomed flask (10 mL) equipped with a stir bar, a solution of the **62** (42.6 mg, 0.1 mmol, 1.0 equiv.) in MeOH (2.0 mL) was prepared. The solution was cooled to 0 °C. NaBH<sub>4</sub> (18.9 mg, 0.5 mmol, 5.0 equiv.) was added and the mixture was stirred at room temperature for 4 hours. the reaction mixture was quenched by adding 3N HCl (aq.) and concentrated. The residue was purified by column chromatography on silica

gel (petroleum ether /CH<sub>2</sub>Cl<sub>2</sub> = 5/1 ~ 1/1) to afford the product **99** (29.6 mg, 92%, 95% e.e.) as a white solid.

### (*R*)-2-Mercapto-*N*-(naphthalen-1-yl)-2-phenylbutanamide (**99**)

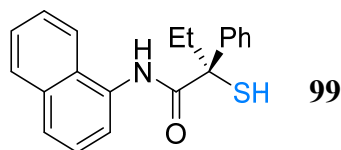

**HPLC** analysis: Chiralcel AS-H (*n*-Hexane/*i*-PrOH = 98/2, flow rate 1.0 mL/min,  $\lambda$  = 214 nm),  $t_R$  (major) = 12.60 min,  $t_R$  (minor) = 15.70 min.

**<sup>1</sup>H NMR** (400 MHz, CDCl<sub>3</sub>)  $\delta$  8.93 (s, 1H), 8.07 (d,  $J$  = 7.5 Hz, 1H), 7.92 – 7.78 (m, 1H), 7.68 (d,  $J$  = 8.3 Hz, 1H), 7.62 (d,  $J$  = 7.7 Hz, 3H), 7.53 – 7.45 (m, 3H), 7.45 – 7.40 (m, 2H), 7.38 – 7.33 (m, 1H), 2.65 (s, 1H), 2.62 – 2.52 (m, 1H), 2.52 – 2.42 (m, 1H), 1.07 (t,  $J$  = 7.3 Hz, 3H).

**<sup>13</sup>C NMR** (100 MHz, CDCl<sub>3</sub>)  $\delta$  171.9, 141.7, 134.2, 132.3, 129.1, 129.0, 128.2, 126.9, 126.8, 126.5, 126.1, 125.9, 125.7, 120.3, 119.6, 61.6, 34.8, 9.9.

**HRMS** (ESI)  $m/z$  calcd for C<sub>20</sub>H<sub>20</sub>ONS [M + H]<sup>+</sup> 322.1260, found: 322.1253.

### The synthesis of **100'** and **100**

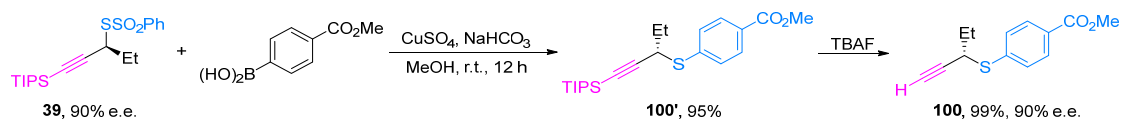

To a mixture of copper(II) sulfate (3.2 mg, 0.02 mmol, 10 mol%) and sodium bicarbonate (33.6 mg, 0.4 mmol, 2.0 equiv.) was added a solution of corresponding thiosulfonates **39** (79.3 mg, 0.2 mmol, 1.0 equiv.) and 4-(methoxycarbonyl)phenylboronic acid (54.0 mg, 0.3 mmol, 1.5 equiv.) dissolved in methanol (1.0 mL) at room temperature. After stirring for 16 hours at the same temperature, the mixture was passed through a short pad of silica gel with EtOAc and then concentrated under reduced pressure. The residue was purified by column chromatography on silica gel (petroleum ether /EtOAc = 100/1 ~ 60/1) to give product **100'** (74.2 mg, 95%) as a colorless oil.

Under argon atmosphere, an oven-dried resealable Schlenk tube equipped with a magnetic stir bar was charged with **100'** (46.9 mg, 0.12 mmol, 1.0 equiv.) dissolved in anhydrous THF (1.2 mL) cooled to –78 °C. Then, tetrabutylammonium fluoride (0.13 mL, 1.0 M in THF, 0.13 mmol, 1.1 equiv.) diluted in anhydrous THF (1.2 mL) were sequentially added into the mixture and the reaction mixture was stirred at –15 °C for 10 min. Upon completion (monitored by TLC), water (10 mL) was added and the resulting mixture was extracted with EtOAc (3 × 5 mL). The extract was washed with brine, dried over anhydrous Na<sub>2</sub>SO<sub>4</sub>, filtered, and concentrated. The residue was purified by column chromatography on silica gel (petroleum ether /EtOAc = 60/1 ~ 20/1) to afford the product **100** (27.8 mg, 99%, 90% e.e.) as a colorless oil.

### Methyl (S)-4-((1-(triisopropylsilyl)pent-1-yn-3-yl)thio)benzoate (**100'**)

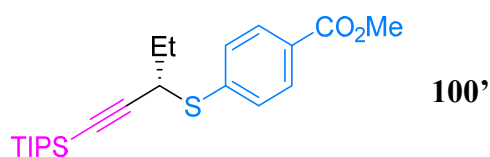

<sup>1</sup>H NMR (400 MHz, CDCl<sub>3</sub>) δ 7.96 – 7.89 (m, 2H), 7.53 – 7.46 (m, 2H), 3.96 (dd, *J* = 7.9, 5.6 Hz, 1H), 3.90 (s, 3H), 1.95 – 1.77 (m, 2H), 1.16 (t, *J* = 7.3 Hz, 3H), 1.04 – 0.97 (m, 21H).

<sup>13</sup>C NMR (100 MHz, CDCl<sub>3</sub>) δ 166.9, 142.1, 129.9, 129.5, 128.0, 106.5, 85.7, 52.2, 39.7, 28.5, 18.7, 11.8, 11.3.

HRMS (ESI) *m/z* calcd for C<sub>22</sub>H<sub>34</sub>NaO<sub>2</sub>SSi [M + Na]<sup>+</sup> 413.1941, found: 413.1949.

### Methyl (S)-4-(pent-1-yn-3-ylthio)benzoate (**100**)

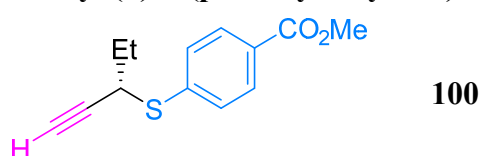

HPLC analysis: Chiralcel OD-H (*n*-Hexane/*i*-PrOH = 98/2, flow rate 0.8 mL/min, λ = 230 nm), *t<sub>R</sub>* (minor) = 12.12 min, *t<sub>R</sub>* (major) = 14.16 min.

<sup>1</sup>H NMR (400 MHz, CDCl<sub>3</sub>) δ 7.96 (d, *J* = 8.5 Hz, 2H), 7.48 (d, *J* = 8.4 Hz, 2H), 3.91 (s, 3H), 3.89 – 3.86 (m, 1H), 2.37 (d, *J* = 2.4 Hz, 1H), 1.93 – 1.81 (m, 2H), 1.15 (t, *J* = 7.4 Hz, 3H).

<sup>13</sup>C NMR (100 MHz, CDCl<sub>3</sub>) δ 166.8, 141.5, 130.0, 129.5, 128.2, 83.0, 72.7, 52.3, 38.6, 28.2, 11.7.

HRMS (ESI) *m/z* calcd for C<sub>13</sub>H<sub>15</sub>O<sub>2</sub>S [M + H]<sup>+</sup> 235.0787, found: 235.0787.

### The synthesis of **101**

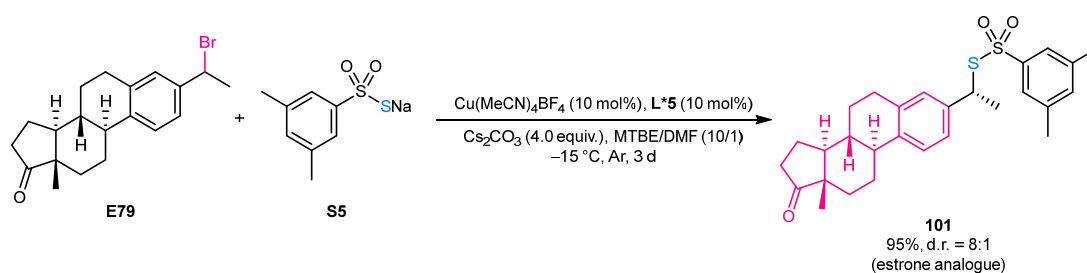

Under argon atmosphere, an oven-dried resealable Schlenk tube equipped with a magnetic stir bar was charged with **S5** (54.0 mg, 0.24 mmol, 1.2 equiv.), Cu(MeCN)<sub>4</sub>BF<sub>4</sub> (6.28 mg, 0.02 mmol, 10 mol%), **L\*5** (15.6 mg, 0.02 mmol, 10 mol%) and Cs<sub>2</sub>CO<sub>3</sub> (260 mg, 0.80 mmol, 4.0 equiv.). Then, **E79** (72.2 mg, 0.20 mmol, 1.0 equiv.) and MTBE/DMF (v/v = 10/1, 2.2 mL) were sequentially added into the mixture and the reaction mixture was stirred at –15 or –30 °C. Upon completion (monitored by TLC), the precipitate was filtered off and washed by CH<sub>2</sub>Cl<sub>2</sub> and EtOAc. The filtrate was evaporated and the residue was purified by column chromatography on silica gel (petroleum ether/EtOAc = 20/1 ~ 5/1) to afford the desired product **101** as a white solid

(86.6 mg, 95% yield, d.r. = 8:1). The diastereomeric ratio was determined by crude  $^1\text{H}$  NMR spectroscopy.

*Note:* The substrates **E79** were known compounds and synthesized according to reported literature<sup>6</sup>, the diastereomeric ratio was determined by crude  $^1\text{H}$  NMR spectroscopy.

**(8*R*,9*S*,13*S*,14*S*)-3-(1-bromoethyl)-13-methyl-6,7,8,9,11,12,13,14,15,16 decahydro-17*H*-cyclopenta[*a*]phenanthren-17-one (**E79**)**

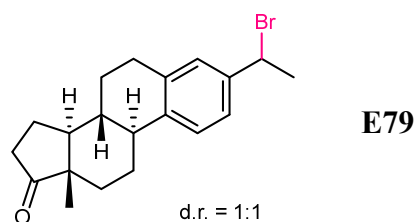

$^1\text{H}$  NMR (400 MHz,  $\text{CDCl}_3$ )  $\delta$  7.31 – 7.20 (m, 2H), 7.17 (s, 1H), 5.28 – 5.09 (m, 1H), 2.98 – 2.87 (m, 2H), 2.56 – 2.46 (m, 1H), 2.45 – 2.38 (m, 1H), 2.33 – 2.24 (m, 1H), 2.22 – 2.09 (m, 2H), 2.07 – 2.01 (m, 4H), 1.99 – 1.93 (m, 1H), 1.69 – 1.60 (m, 2H), 1.56 – 1.38 (m, 4H), 0.90 (s, 3H).

***S*-((*R*)-1-((8*R*,9*S*,13*S*,14*S*)-13-Methyl-17-oxo-7,8,9,11,12,13,14,15,16,17-decahydro-6*H*-cyclopenta[*a*]phenanthren-3-yl)ethyl) dimethylbenzenesulfonothioate (**101**)**

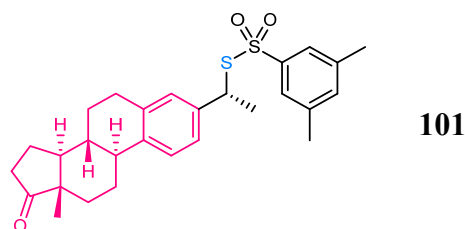

$^1\text{H}$  NMR (400 MHz,  $\text{CDCl}_3$ )  $\delta$  7.36 – 7.30 (m, 2H), 7.16 – 7.10 (m, 2H), 6.97 – 6.91 (m, 1H), 6.88 – 6.82 (m, 1H), 4.63 – 4.54 (m, 1H), 2.85 – 2.74 (m, 2H), 2.55 – 2.46 (m, 1H), 2.41 – 2.34 (m, 1H), 2.31 (s, 6H), 2.25 – 1.93 (m, 6H), 1.66 (d,  $J = 7.2$  Hz, 3H), 1.60 – 1.41 (m, 5H), 0.90 (s, 3H).

$^{13}\text{C}$  NMR (100 MHz,  $\text{CDCl}_3$ )  $\delta$  220.7, 145.0, 139.4, 139.0, 137.8, 136.8, 134.9, 127.8, 125.6, 124.5, 124.4, 124.4, 50.6, 50.5, 48.0, 44.4, 38.1, 35.9, 31.6, 29.3, 26.5, 25.6, 22.8, 21.6, 21.3, 13.9.

HRMS (ESI)  $m/z$  calcd. for  $\text{C}_{28}\text{H}_{34}\text{NaO}_3\text{S}_2$  [ $\text{M} + \text{Na}$ ] $^+$  505.1842, found: 505.1837.

## The synthesis of 102

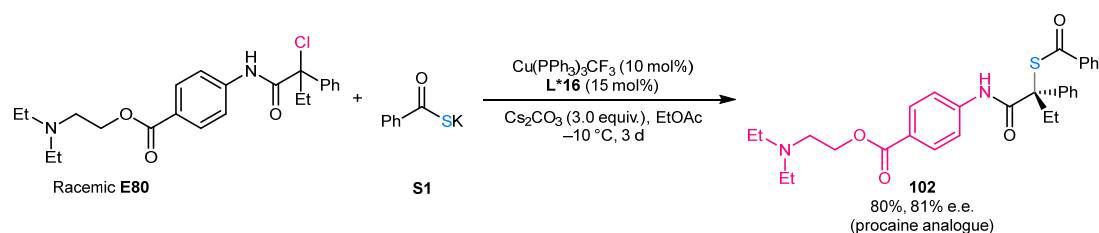

Under argon atmosphere, an oven-dried resealable Schlenk tube equipped with a magnetic stir bar was charged with tertiary alkyl electrophiles **E80** (41.7 mg, 0.1 mmol, 1.0 equiv.),  $\text{Cu(PPh}_3)_3\text{CF}_3$  (9.24 mg, 0.010 mmol, 10 mol%), **L\*16** (8.44 mg, 0.015 mmol, 15 mol%), **S1** (0.15 mmol, 1.5 equiv.) and  $\text{Cs}_2\text{CO}_3$  (97.6 mg, 0.30 mmol, 3.0 equiv.). Then, EtOAc (2.0 mL) were sequentially added into the mixture and the reaction mixture was stirred at  $-10^\circ\text{C}$  for 3 days. The precipitate was filtered off and washed by  $\text{CH}_2\text{Cl}_2$  and EtOAc. The filtrate was evaporated and the residue was purified by column chromatography on silica gel ( $\text{CH}_2\text{Cl}_2/\text{MeOH} = 200/1 \sim 30/1$ ) to afford the desired product **102** as a light yellow oli (41.7 mg, 80% yield, 81% e.e.).

### 2-(Diethylamino)ethyl 4-(2-chloro-2-phenylbutanamido)benzoate (**E80**)

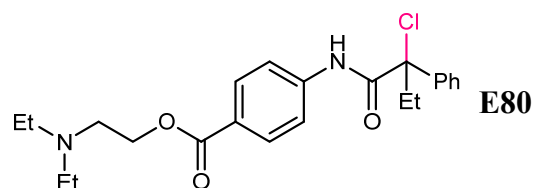

$^1\text{H NMR}$  (400 MHz,  $\text{CDCl}_3$ )  $\delta$  8.65 (s, 1H), 8.04 – 7.92 (m, 2H), 7.72 – 7.62 (m, 2H), 7.62 – 7.54 (m, 2H), 7.43 – 7.29 (m, 3H), 4.73 (t,  $J = 5.4$  Hz, 2H), 3.38 (t,  $J = 5.4$  Hz, 2H), 3.15 (q,  $J = 7.3$  Hz, 4H), 2.70 – 2.55 (m, 1H), 2.49 – 2.35 (m, 1H), 1.35 (t,  $J = 7.3$  Hz, 6H), 1.04 (t,  $J = 7.2$  Hz, 3H).

$^{13}\text{C NMR}$  (100 MHz,  $\text{CDCl}_3$ )  $\delta$  168.4, 165.2, 141.8, 139.6, 130.8, 128.6, 128.5, 126.2, 124.9, 119.3, 79.0, 59.5, 49.9, 47.4, 34.8, 9.3, 9.1.

HRMS (ESI)  $m/z$  calcd. for  $\text{C}_{23}\text{H}_{30}\text{ClN}_2\text{O}_3$   $[\text{M} + \text{H}]^+$  417.1939, found: 417.1944.

### 2-(Diethylamino)ethyl (*R*)-4-(2-(benzoylthio)-2-phenylbutanamido)benzoate (**102**)

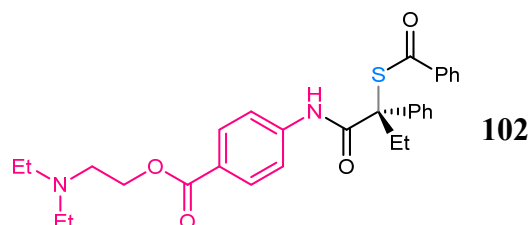

HPLC analysis: Chiralcel ADH ( $n$ -Hexane/*i*-PrOH = 70/30, flow rate 0.8 mL/min,  $\lambda = 254$  nm),  $t_R$  (minor) = 17.06 min,  $t_R$  (major) = 23.40 min.

$^1\text{H NMR}$  (400 MHz,  $\text{CDCl}_3$ )  $\delta$  9.31 (s, 1H), 8.05 – 7.91 (m, 4H), 7.66 – 7.56 (m, 3H), 7.51 – 7.42 (m, 4H), 7.40 – 7.31 (m, 3H), 4.39 (t,  $J = 6.2$  Hz, 2H), 2.88 (t,  $J = 6.2$  Hz, 2H), 2.66 (q,  $J = 7.1$  Hz, 4H), 2.50 – 2.40 (m, 1H), 2.34 – 2.25 (m, 1H), 1.08 (t,  $J = 7.1$  Hz, 6H), 0.87 (t,  $J = 7.3$  Hz, 3H).

**<sup>13</sup>C NMR** (100 MHz, CDCl<sub>3</sub>) δ 192.7, 170.3, 166.2, 142.6, 137.6, 136.7, 134.4, 130.9, 129.0, 128.7, 128.1, 127.7, 127.3, 125.6, 119.1, 66.0, 63.1, 51.0, 47.9, 32.7, 12.0, 9.3.  
**HRMS** (ESI) *m/z* calcd. for C<sub>30</sub>H<sub>35</sub>N<sub>2</sub>O<sub>4</sub>S [M + H]<sup>+</sup> 519.2312, found: 519.2296.



## 10. Mechanistic studies

### The synthesis of copper(I) 3,5-dimethylbenzenesulfonothioate **103**

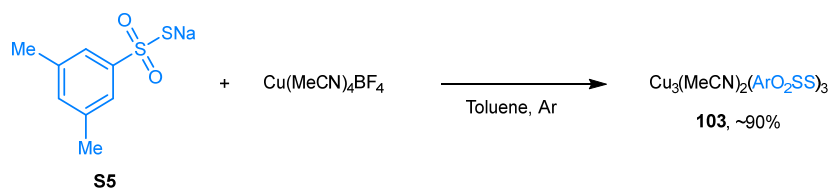

Under argon atmosphere, an oven-dried resealable Schlenk tube equipped with a magnetic stir bar was charged with sodium 3,5-dimethylbenzenesulfonothioate **S5** (67.8 mg, 0.3 mmol, 1.0 eq.),  $\text{Cu}(\text{MeCN})_4\text{BF}_4$  (0.3 mmol, 1.0 eq.). Then, toluene (1.5 mL) were sequentially added into the mixture and the reaction mixture was stirred at r.t. for 5 hours, the toluene was evaporated under vacuum to afford analytically pure **103** (~90% yield) as a light yellow solid.

### Bis(acetonitrile)tri(copper) tri(3,5-dimethylbenzenesulfonothioate) (**103**)

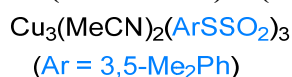

<sup>1</sup>H NMR (400 MHz, DMSO-*d*<sub>6</sub>) δ 7.48 (s, 6H), 7.14 (s, 3H), 2.31 (s, 18H), 2.07 (s, 6H).

<sup>13</sup>C NMR (100 MHz, DMSO-*d*<sub>6</sub>) δ 150.8, 137.6, 132.1, 122.4, 117.9, 20.6, 0.9.

HRMS (ESI) *m/z* calcd for C<sub>24</sub>H<sub>27</sub>Cu<sub>3</sub>NaO<sub>6</sub>S<sub>6</sub> [M – 2MeCN + Na]<sup>+</sup> 816.7894, found: 816.7871.

### The effects of the ligand and copper 3,5-dimethylbenzenesulfonothioate **103** on the reaction initiation and product formation

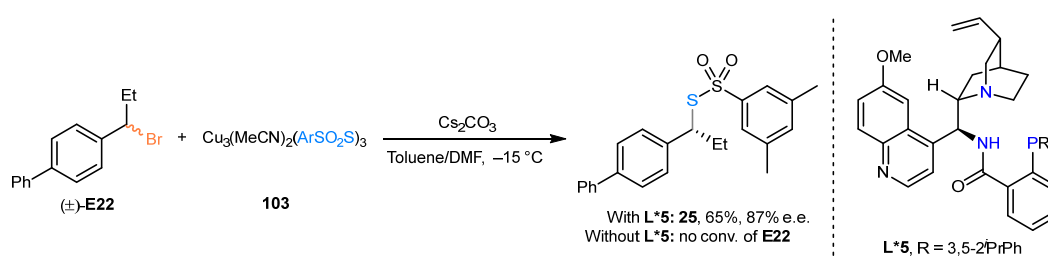

Under argon atmosphere, an oven-dried resealable Schlenk tube equipped with a magnetic stir bar was charged with **103** (17.5 mg, 0.02 mmol, 0.4 eq.), **L\*5** (46.8 mg, 0.06 mmol, 1.2 eq.),  $\text{Cs}_2\text{CO}_3$  (65.0 mg, 0.20 mmol, 4.0 eq.), Then, 4-(1-bromopropyl)-1,1'-biphenyl **E22** (13.8 mg, 0.05 mmol, 1.0 eq.) and toluene/DMF (v/v = 10/1, 0.55 mL) were sequentially added into the mixture and the reaction mixture was stirred at -15 °C for 3.5 days. Upon completion, the reaction was quenched with H<sub>2</sub>O and extracted with EtOAc. The combined organic layer was concentrated to afford crude product. The residue was analyzed by <sup>1</sup>H NMR spectroscopy using 1,3,5-trimethylbenzene as an internal standard. The product was then separated by preparative TLC. The e.e. values of **25** was determined by HPLC analysis.

The procedure for the reaction without **L\*5** was the same with that described above except that **L\*5** was not added. There was no conversion of **E22**.

### The effects of sodium 3,5-dimethylbenzenesulfonothioate **S5** on the reaction initiation and product formation

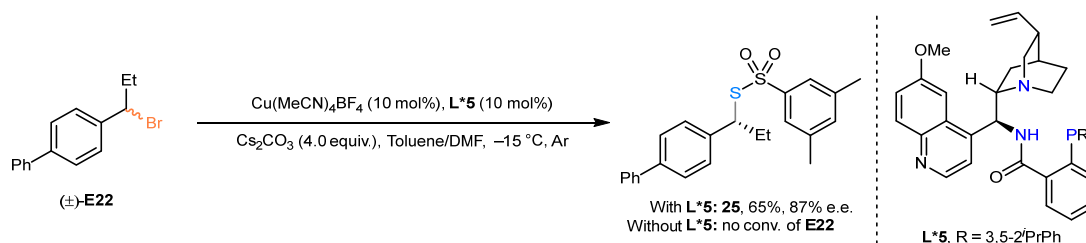

According to the **general procedure A** with 4-(1-bromopropyl)-1,1'-biphenyl **E22** (55.0 mg, 0.20 mmol, 1.0 eq.) and sodium 3,5-dimethylbenzenesulfonothioate **S5** (54.0 mg, 0.24 mmol, 1.2 eq.) run at  $-15\text{ }^\circ\text{C}$  for 5 days, the reaction mixture was purified by column chromatography on silica gel (petroleum ether/EtOAc = 60/1 ~ 20/1) to yield the product **25** as a colorless oil (69.8 mg, 88% yield, 92% e.e.).

The procedure for the reaction without **S5** was the same with that described above except that **L\*5** was not added. There was no conversion of **E22**.

### The stereochemistry of benzyl halide and product during the reaction

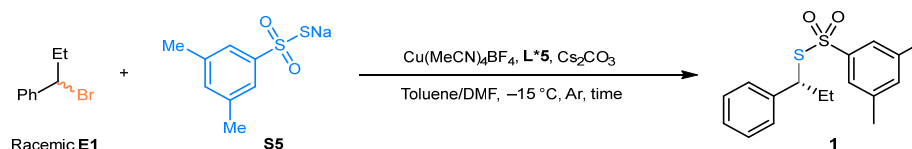

Under argon atmosphere, an oven-dried resealable Schlenk tube equipped with a magnetic stir bar was charged with **S5** (0.06 mmol, 1.2 eq.),  $\text{Cu}(\text{MeCN})_4\text{BF}_4$  (1.57 mg, 0.005 mmol, 10 mol%), **L\*5** (3.9 mg, 0.005 mmol, 10 mol%) and  $\text{Cs}_2\text{CO}_3$  (65 mg, 0.20 mmol, 4.0 eq.). Then, **E1** (0.05 mmol, 1.0 eq.) and toluene/DMF (v/v = 10/1, 0.55 mL) were sequentially added into the mixture and the reaction mixture was stirred at  $-15\text{ }^\circ\text{C}$  for appropriate time. Upon completion, the reaction was quenched with  $\text{H}_2\text{O}$  and extracted with EtOAc. The combined organic layer was concentrated to afford crude product. The residue was analyzed by  $^1\text{H}$  NMR spectroscopy using 1,3,5-trimethylbenzene as an internal standard. The product was then separated by preparative TLC. The e.e. values of **1** and recovered **E1** were determined by HPLC analysis.

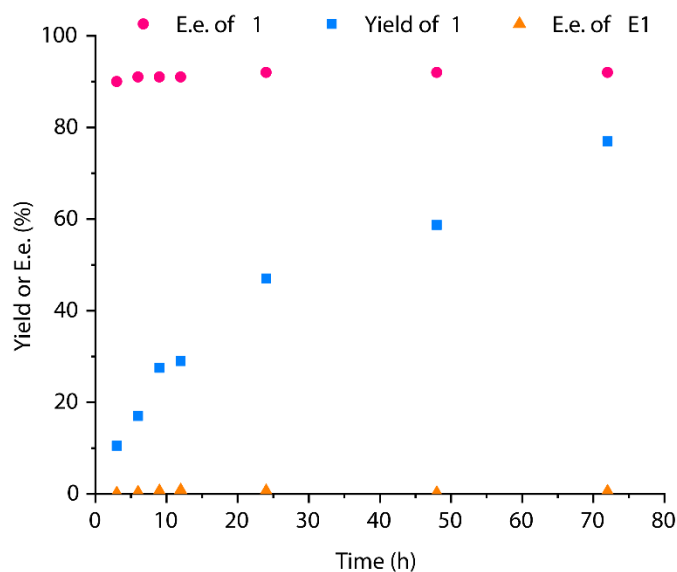

No apparent enantioenrichment of the recovered alkyl bromide **E1** was observed under typical conditions, disfavoring a possible kinetic resolution of **E1**, and therefore ruling out the typical  $S_N2$ -type substitution pathway. Moreover, the observed e.e. values of the product **1** remained nearly constant at different time intervals, favoring the involvement of a uniform mechanism throughout the reaction course.

### Radical trap experiments

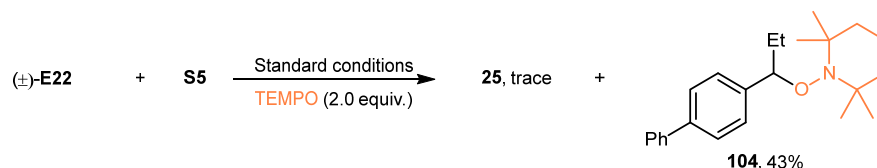

According to the **general procedure A** with 4-(1-bromopropyl)-1,1'-biphenyl **E22** (55.0 mg, 0.20 mmol, 1.0 eq.), sodium 3,5-dimethylbenzenesulfonothioate **S5** (54.0 mg, 0.24 mmol, 1.2 eq.) and 2,2,6,6-tetramethyl-1-piperidinyloxy (TEMPO, 62.5 mg, 0.40 mmol, 2.0 eq.) run at  $-15\text{ }^\circ\text{C}$  for 5 days, the reaction mixture was purified by column chromatography on silica gel (petroleum ether/EtOAc = 60/1) to yield the TEMPO-trapped products **104** as a white solid (30.5 mg, 43% yield).

### 1-(1-([1,1'-Biphenyl]-4-yl)propoxy)-2,2,6,6-tetramethylpiperidine (**104**)

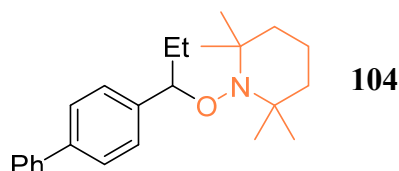

$^1\text{H NMR}$  (400 MHz,  $\text{CDCl}_3$ )  $\delta$  7.61 (d,  $J = 7.7$  Hz, 2H), 7.54 (d,  $J = 7.8$  Hz, 2H), 7.42 (t,  $J = 7.6$  Hz, 2H), 7.36 – 7.28 (m, 3H), 4.59 (dd,  $J = 9.5, 3.8$  Hz, 1H), 2.19 – 2.07 (m, 1H), 1.91 – 1.77 (m, 1H), 1.49 (s, 3H), 1.41 – 1.14 (m, 10H), 1.03 (s, 3H), 0.71 (t,  $J = 7.4$  Hz, 3H), 0.65 (s, 2H).

$^{13}\text{C}$  NMR (100 MHz,  $\text{CDCl}_3$ )  $\delta$  142.8, 141.2, 139.6, 128.8, 128.3, 127.2, 127.1, 126.6, 88.5, 60.0 – 59.7 (m, 1C), 40.6, 34.5 – 34.3 (m, 1C), 28.9, 20.7 – 20.5 (m, 1C), 17.4, 9.9.

Note: **104** is a known compound<sup>9</sup>.

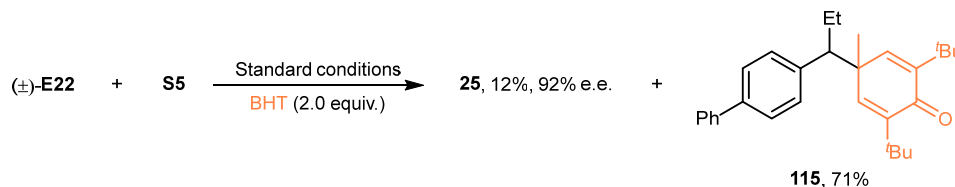

According to the **general procedure A** with 4-(1-bromopropyl)-1,1'-biphenyl **E22** (55.0 mg, 0.20 mmol, 1.0 eq.), sodium 3,5-dimethylbenzenesulfonothioate **S5** (54.0 mg, 0.24 mmol, 1.2 eq.) and 2,6-di-*tert*-butyl-4-methylphenol (BHT, 88.1 mg, 0.40 mmol, 2.0 eq.) run at  $-15\text{ }^\circ\text{C}$  for 5 days, the reaction mixture was purified by column chromatography on silica gel (petroleum ether/EtOAc = 60/1) to yield the BHT-trapped products **115** as a colorless oil (58.7 mg, 71% yield).

#### 4-(1-([1,1'-Biphenyl]-4-yl)propyl)-2,6-di-*tert*-butyl-4-methylcyclohexa-2,5-dien-1-one (**115**)

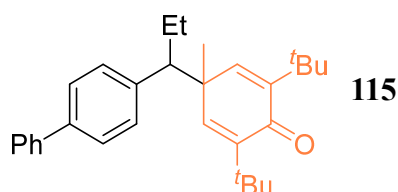

$^1\text{H}$  NMR (400 MHz,  $\text{CDCl}_3$ )  $\delta$  7.56 (d,  $J = 7.7$  Hz, 2H), 7.48 (d,  $J = 7.8$  Hz, 2H), 7.41 (t,  $J = 7.4$  Hz, 2H), 7.31 (t,  $J = 7.3$  Hz, 1H), 7.12 (d,  $J = 7.8$  Hz, 2H), 6.59 (s, 1H), 6.44 (s, 1H), 2.67 – 2.60 (m, 1H), 1.83 – 1.72 (m, 1H), 1.64 – 1.52 (m, 1H), 1.28 (s, 9H), 1.15 (s, 3H), 1.12 (s, 9H), 0.72 (t,  $J = 7.2$  Hz, 3H).

$^{13}\text{C}$  NMR (100 MHz,  $\text{CDCl}_3$ )  $\delta$  186.5, 147.1, 146.1, 145.8, 145.4, 141.0, 139.7, 139.4, 129.7, 128.8, 127.2, 127.1, 126.6, 57.8, 43.1, 35.0, 34.8, 29.6, 29.5, 25.5, 22.9, 13.1.

HRMS (ESI)  $m/z$  calcd for  $\text{C}_{30}\text{H}_{39}\text{O}$   $[\text{M} + \text{H}]^+$  415.2995, found: 415.2992.

#### Radical clock experiments

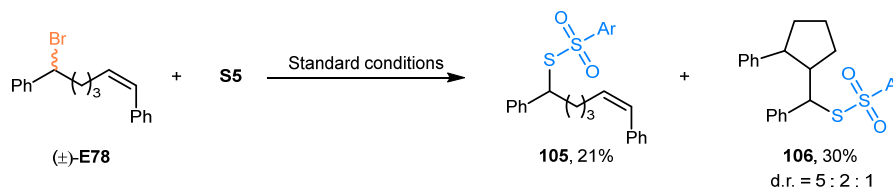

Under argon atmosphere, an oven-dried resealable Schlenk tube equipped with a magnetic stir bar was charged with sodium 3,5-dimethylbenzenesulfonothioate **S5** (54.0 mg, 0.24 mmol, 1.2 eq.),  $\text{Cu}(\text{MeCN})_4\text{BF}_4$  (6.28 mg, 0.02 mmol, 10 mol%), **L\*5** (15.6 mg, 0.02 mmol, 10 mol%) and  $\text{Cs}_2\text{CO}_3$  (260 mg, 0.80 mmol, 4.0 eq.). Then, (*Z*)-(6-bromohex-1-ene-1,6-diyl)dibenzene **E78** and toluene/DMF (v/v = 10/1, 2.2 mL) were

sequentially added into the mixture and the reaction mixture was stirred at  $-15\text{ }^{\circ}\text{C}$  for 5 days. The precipitate was filtered off and washed by  $\text{CH}_2\text{Cl}_2$ . The filtrate was evaporated and the residue was purified by column chromatography (petroleum ether/EtOAc = 60/1 ~ 20/1) on silica gel to afford the desired product **105** as a colorless oil (18.2 mg, 21% yield) and the radical clock product **106** was then separated by preparative TLC (*n*-Hexane/EtOAc = 20/1) as a colorless oil (26.0 mg, 30% yield, d.r. = 5:2:1). The diastereomeric ratio was determined by crude  $^1\text{H}$  NMR spectroscopy.

**(*R,Z*)-*S*-1,6-Diphenylhex-5-en-1-yl 3,5-dimethylbenzenesulfonothioate (105)**

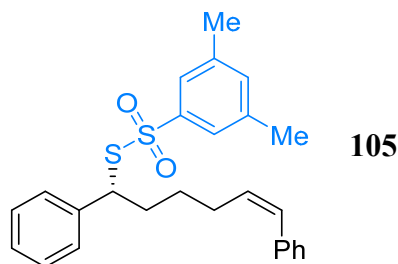

$^1\text{H}$  NMR (400 MHz,  $\text{CDCl}_3$ )  $\delta$  7.31 (t,  $J = 7.6$  Hz, 2H), 7.25 – 7.17 (m, 3H), 7.16 – 7.12 (m, 5H), 7.09 – 7.05 (m, 2H), 7.03 (s, 1H), 6.39 (d,  $J = 11.6$  Hz, 1H), 5.50 (dt,  $J = 11.7, 7.2$  Hz, 1H), 4.46 (dd,  $J = 9.0, 6.5$  Hz, 1H), 2.35 – 2.24 (m, 2H), 2.22 (s, 6H), 2.01 – 1.81 (m, 2H), 1.51 – 1.40 (m, 1H), 1.39 – 1.28 (m, 1H).

$^{13}\text{C}$  NMR (100 MHz,  $\text{CDCl}_3$ )  $\delta$  145.1, 139.5, 138.9, 137.5, 134.8, 131.8, 129.6, 128.8, 128.4, 128.3, 127.8 (two carbon overlapped), 126.7, 124.3, 55.9, 36.0, 28.0, 27.6, 21.2.

HRMS (ESI)  $m/z$  calcd for  $\text{C}_{26}\text{H}_{28}\text{NaO}_2\text{S}_2$  [ $\text{M} + \text{Na}$ ] $^+$  459.1423, found: 459.1422.

***S*-(Phenyl(2-phenylcyclopentyl)methyl) 3,5-dimethylbenzenesulfonothioate (106)**

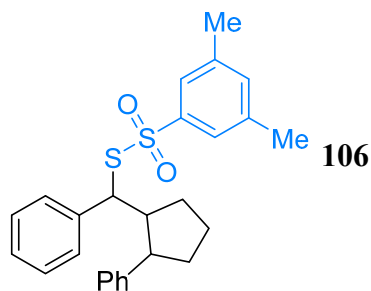

d.r. = 5 : 2 : 1

$^1\text{H}$  NMR (400 MHz,  $\text{CDCl}_3$ )  $\delta$  7.22 – 7.10 (m, 6.4H), 7.04 – 6.91 (m, 12.4H), 6.77 – 6.69 (m, 1H), 6.64 – 6.54 (m, 1H), 4.50 (d,  $J = 5.9$  Hz, 1H), 4.47 – 4.44 (m, 0.2H), 4.04 (d,  $J = 11.8$  Hz, 0.4H), 2.92 (q,  $J = 8.9$  Hz, 1H), 2.87 – 2.82 (m, 0.2H), 2.79 – 2.65 (m, 0.4H), 2.53 (t,  $J = 7.7$  Hz, 0.4H), 2.46 – 2.35 (m, 1.2H), 2.23 (s, 1.2H), 2.21 (s, 2.4H), 2.15 (s, 6H), 2.11 – 2.03 (m, 1.4H), 2.01 – 1.91 (m, 1.8H), 1.82 – 1.55 (m, 6.4H).

$^{13}\text{C}$  NMR (100 MHz,  $\text{CDCl}_3$ ) (major 1)  $\delta$  145.1, 144.6, 139.9, 138.6(8), 134.6, 128.5, 128.2, 127.9, 127.5, 127.2, 126.2, 124.3, 59.8, 54.5, 49.8, 35.6, 30.3, 24.7, 21.1.

$^{13}\text{C}$  NMR (100 MHz,  $\text{CDCl}_3$ ) (major 2)  $\delta$  145.1, 143.2, 139.6(6), 138.7(4), 134.8, 129.2, 128.2, 128.1, 127.8, 127.4, 126.3, 124.4, 58.6, 49.6, 47.9, 34.8, 31.1, 29.8, 23.9, 21.2.

$^{13}\text{C}$  NMR (100 MHz,  $\text{CDCl}_3$ ) (minor)  $\delta$  145.2, 142.5, 139.6(7), 138.9, 129.0, 128.8, 128.4(2), 128.3(8), 127.7, 125.8, 124.3, 124.2, 56.1, 36.4, 35.8, 31.2, 29.5, 28.7, 27.2.  
**HRMS** (ESI)  $m/z$  calcd for  $\text{C}_{26}\text{H}_{28}\text{NaO}_2\text{S}_2$   $[\text{M} + \text{Na}]^+$  459.1423, found: 459.1422.

### Radical trap experiments for the propargyl reaction

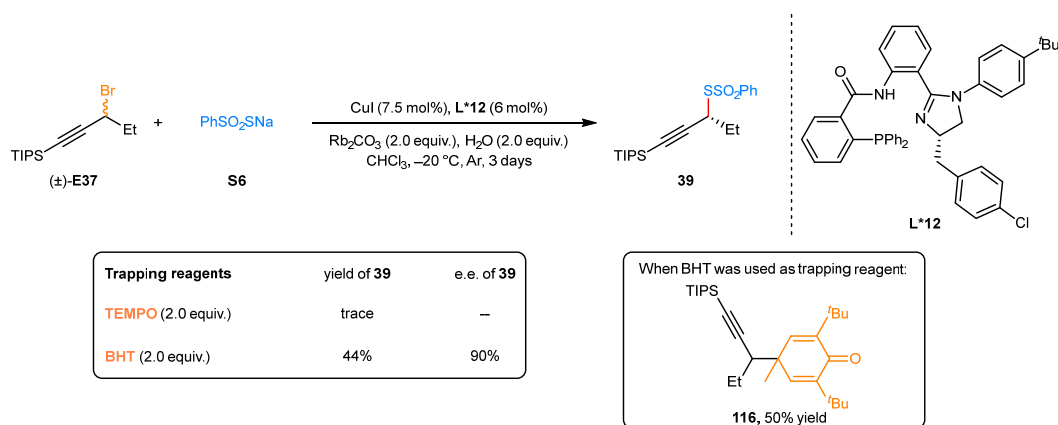

Under argon atmosphere, an oven-dried resealable Schlenk tube equipped with a magnetic stir bar was charged with sodium benzenethiosulfonate **S6** (47.2 mg, 0.24 mmol, 1.2 equiv.), CuI (2.86 mg, 0.015 mmol, 7.5 mol%), **L\*12** (8.47 mg, 0.012 mmol, 6 mol%),  $\text{Rb}_2\text{CO}_3$  (92.8 mg, 0.40 mmol, 2.0 equiv.) and the corresponding trapping reagents (2.0 equiv.). Then, propargyl halide (0.20 mmol, 1.0 equiv.),  $\text{H}_2\text{O}$  (7.2  $\mu\text{L}$ , 0.40 mmol, 2.0 equiv.) and  $\text{CHCl}_3$  (2.0 mL) were sequentially added into the mixture and the reaction mixture was stirred at  $-20\text{ }^\circ\text{C}$ . Upon completion (monitored by TLC), the precipitate was filtered off and washed by  $\text{CH}_2\text{Cl}_2$ . The filtrate was evaporated and the residue was purified by column chromatography on silica gel (petroleum ether/EtOAc = 100/1 ~ 50/1) to afford the desired product **39**.

*Note:* When TEMPO was used as trapping reagent, the coupling was completely inhibited. When BHT was used as trapping reagent, the residue was purified by preparative TLC ( $n$ -Hexane/ $\text{Et}_2\text{O}$  = 60/1) to afford the BHT-trapped products **116** as colorless oil (44.3 mg, 50% yield).

### 2,6-Di-*tert*-butyl-4-methyl-4-(1-(triisopropylsilyl)pent-1-yn-3-yl)cyclohexa-2,5-dien-1-one (**116**)

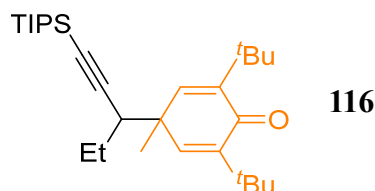

$^1\text{H}$  NMR (400 MHz,  $\text{CDCl}_3$ )  $\delta$  6.82 (d,  $J$  = 2.9 Hz, 1H), 6.36 (d,  $J$  = 2.9 Hz, 1H), 2.41 (dd,  $J$  = 11.0, 3.8 Hz, 1H), 1.35 (s, 3H), 1.25 – 1.20 (m, 19H), 1.13 – 1.07 (m, 22H), 0.98 (t,  $J$  = 7.1 Hz, 3H).

$^{13}\text{C}$  NMR (100 MHz,  $\text{CDCl}_3$ )  $\delta$  186.6, 147.3(4), 147.3(1), 145.9, 144.3, 108.1, 85.1, 45.3, 42.5, 35.0, 34.9, 29.7, 26.2, 24.1, 18.8, 12.8, 11.4.

HRMS (ESI)  $m/z$  calcd for  $\text{C}_{29}\text{H}_{51}\text{OSi}$   $[\text{M} + \text{H}]^+$  443.3704, found: 443.3699.

### The synthesis of copper(I) thiocarboxylate **117**

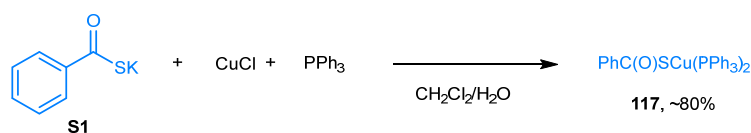

Potassium benzothioate **S1** (123.4 mg, 0.7 mmol, 1.0 eq.) in 1.0 mL of water was added a suspension of  $\text{CuCl}$  (69.3 mg, 0.7 mmol, 1.0 eq.) in 2.0 mL of  $\text{CH}_2\text{Cl}_2$  containing triphenylphosphine (367.2 mg, 1.4 mmol, 2.0 eq.). The reddish  $\text{CH}_2\text{Cl}_2$  layer was separated and layered with  $\text{Et}_2\text{O}$ . Greenish yellow solid were filtered off, washed with  $\text{Et}_2\text{O}$ , and dried under vacuum to afford the product **117** as greenish yellow solid (~80% yield).

*Note:* The **117** is a known compound and synthesized according to reported literature<sup>13</sup>.

### Bis(triphenylphosphine)copper(I) thiocarboxylate (**117**)

$\text{PhC(O)SCu(PPh}_3)_2$

$^1\text{H}$  NMR (400 MHz,  $\text{CDCl}_3$ )  $\delta$  7.91 (d,  $J = 7.6$  Hz, 2H), 7.40 – 7.30 (m, 14H), 7.29 – 7.25 (m, 5H), 7.21 – 7.13 (m, 14H).

$^{31}\text{P}$  NMR (162 MHz,  $\text{CDCl}_3$ )  $\delta$  -1.83.

*Note:* **117** is a known compound and NMR spectra match with the literature report<sup>13</sup>.

### The effect of ligand and copper(I) thiocarboxylates **117** for the tertiary reaction

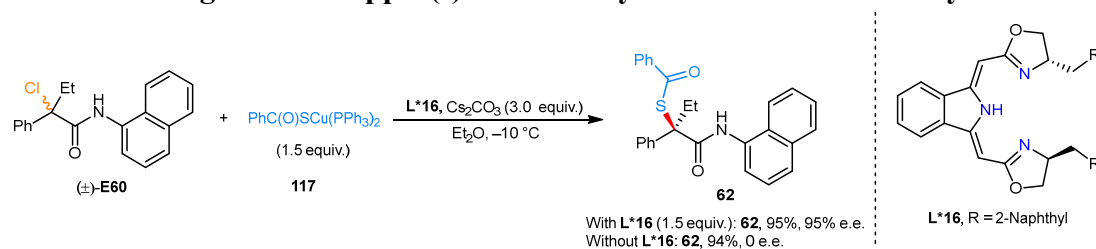

Under argon atmosphere, an oven-dried resealable Schlenk tube equipped with a magnetic stir bar was charged with tertiary alkyl electrophiles **E60** (16.2 mg, 0.05 mmol, 1.0 equiv.),  $\text{PhC(O)SCu(PPh}_3)_2$  (54.4 mg, 0.075 mmol, 1.5 equiv.), **L\*16** (42.2 mg, 0.075 mmol, 1.5 equiv.) and  $\text{Cs}_2\text{CO}_3$  (97.6 mg, 0.30 mmol, 3.0 equiv.). Then,  $\text{Et}_2\text{O}$  (2.0 mL) were sequentially added into the mixture and the reaction mixture was stirred at -10 °C for 3 days. Upon completion, the reaction was quenched with  $\text{H}_2\text{O}$  and extracted with  $\text{EtOAc}$ . The combined organic layer was concentrated to afford crude product. The residue was analyzed by  $^1\text{H}$  NMR spectroscopy using 1,3,5-trimethylbenzene as an internal standard. The product was then separated by preparative TLC. The e.e. values of **62** was determined by HPLC analysis.

The procedure for the reaction without **L\*16** was the same with that described above

except that **L\*16** was not added. The racemic product **62** was obtained in high yield, which indicated that there was a strong background reaction without chiral ligand **L\*16**. While combination **L\*16** and copper(I) thiocarboxylates effectively tuned reactivity and enantioselectivity of this reaction.

### Radical clock experiments for the tertiary reaction

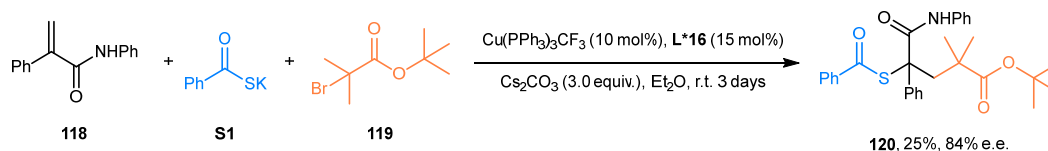

*Note:* The substrate **118** was a known compound and synthesized according to reported literature<sup>14</sup>, and **119** was commercially available.

Under argon atmosphere, an oven-dried resealable Schlenk tube equipped with a magnetic stir bar was charged with *N*,2-diphenylacrylamide **118** (0.1 mmol, 1.0 equiv.), potassium benzothioate **S1** (0.15 mmol, 1.5 equiv.), Cu(PPh<sub>3</sub>)<sub>3</sub>CF<sub>3</sub> (9.24 mg, 0.010 mmol, 10 mol%), **L\*16** (8.44 mg, 0.015 mmol, 15 mol%) and Cs<sub>2</sub>CO<sub>3</sub> (97.6 mg, 0.30 mmol, 3.0 equiv.). Then, *tert*-butyl 2-bromo-2-methylpropanoate **119** (22.4 μL, 0.12 mmol, 1.2 equiv.) and Et<sub>2</sub>O (2.0 mL) were sequentially added into the mixture and the reaction mixture was stirred at r.t. for 3 days. The precipitate was filtered off and washed by CH<sub>2</sub>Cl<sub>2</sub>. The filtrate was evaporated and the residue was purified by column chromatography on silica gel (petroleum ether/EtOAc = 50/1 ~ 10/1) to afford the desired product **120** as colorless oil (12.6 mg, 25% yield, 84% e.e.).

### *N*,2-Diphenylacrylamide (**118**)

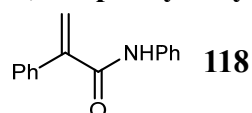

<sup>1</sup>H NMR (400 MHz, CDCl<sub>3</sub>) δ 7.51 (d, *J* = 8.0 Hz, 2H), 7.47 – 7.37 (m, 6H), 7.30 (t, *J* = 7.8 Hz, 2H), 7.11 (t, *J* = 7.4 Hz, 1H), 6.26 (s, 1H), 5.71 (s, 1H).

### *Tert*-butyl 4-(benzoylthio)-2,2-dimethyl-5-oxo-4-phenyl-5-(phenylamino)pentanoate (**120**)

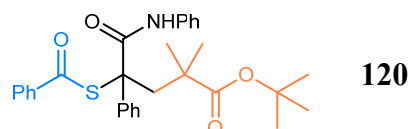

**HPLC** analysis: Chiralcel IG (*n*-hexane/*i*-PrOH = 80/20, flow rate 1.0 mL/min, λ = 254 nm), *t*<sub>R</sub> (major) = 15.54 min, *t*<sub>R</sub> (minor) = 17.50 min.

<sup>1</sup>H NMR (400 MHz, CDCl<sub>3</sub>) δ 8.78 (s, 1H), 7.96 (d, *J* = 7.8 Hz, 2H), 7.63 – 7.55 (m, 3H), 7.49 – 7.41 (m, 4H), 7.35 – 7.25 (m, 5H), 7.06 (t, *J* = 7.4 Hz, 1H), 3.07 (d, *J* = 15.2 Hz, 1H), 2.96 (d, *J* = 15.2 Hz, 1H), 1.36 (s, 9H), 1.21 (s, 3H), 1.00 (s, 3H).



**<sup>13</sup>C NMR** (101 MHz, CDCl<sub>3</sub>) δ 191.2, 176.9, 169.8, 139.9, 138.3, 136.9, 134.2, 129.0, 128.8, 128.7, 128.0, 127.8, 127.5, 124.3, 120.2, 80.2, 64.7, 46.9, 43.0, 28.0, 27.7, 26.7.  
**HRMS** (ESI) *m/z* calcd for C<sub>30</sub>H<sub>34</sub>NO<sub>4</sub>S [M + H]<sup>+</sup> 504.2203, found: 504.2198.

## 11. X-ray crystallography

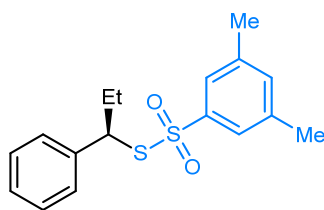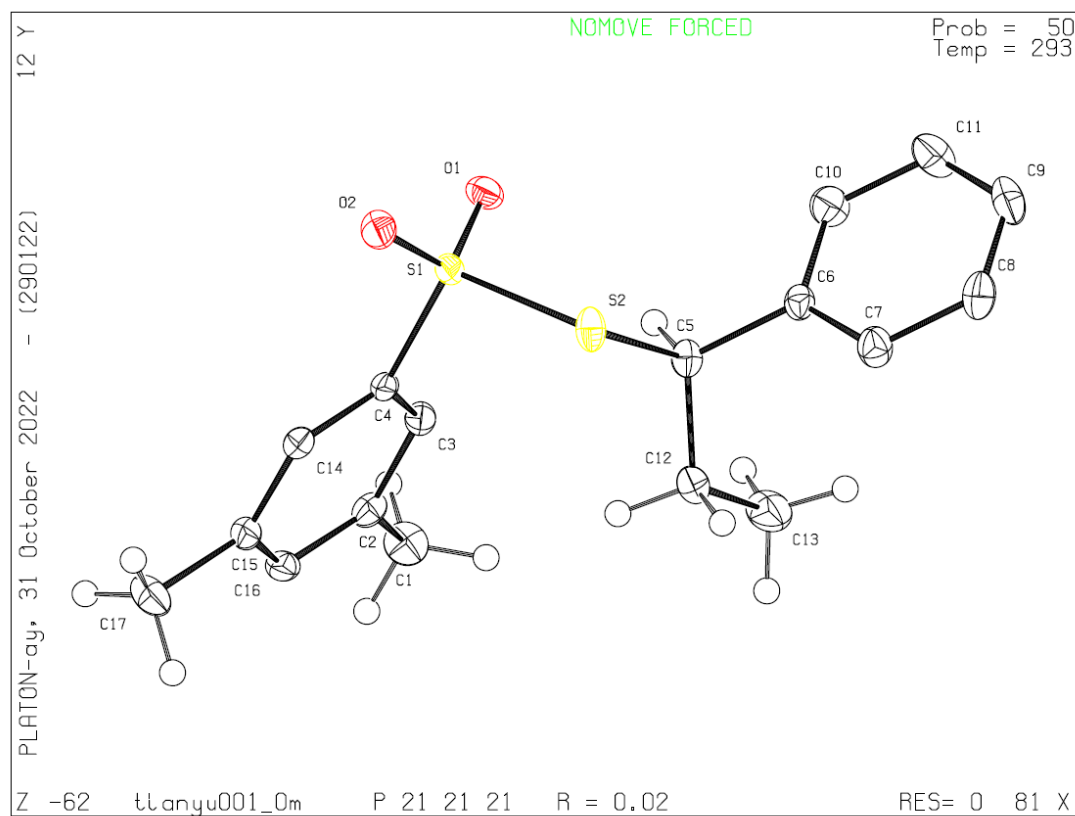

**Supplementary Fig. 5'** | The X-ray structure of **1** (CCDC 2212974, 50% probability ellipsoids).

**Supplementary Table 9 | Crystal data and structure refinement for Compound 1.**

|                                                              |                                                                              |
|--------------------------------------------------------------|------------------------------------------------------------------------------|
| Empirical formula                                            | C <sub>17</sub> H <sub>20</sub> O <sub>2</sub> S <sub>2</sub>                |
| Formula weight                                               | 320.45                                                                       |
| Temperature/K                                                | 100.0                                                                        |
| Crystal system                                               | orthorhombic                                                                 |
| Space group                                                  | <i>P</i> 2 <sub>1</sub> 2 <sub>1</sub> 2 <sub>1</sub>                        |
| <i>a</i> /Å                                                  | 8.676(4)                                                                     |
| <i>b</i> /Å                                                  | 10.434(6)                                                                    |
| <i>c</i> /Å                                                  | 17.758(6)                                                                    |
| $\alpha$ /°                                                  | 90                                                                           |
| $\beta$ /°                                                   | 90                                                                           |
| $\gamma$ /°                                                  | 90                                                                           |
| Volume/Å <sup>3</sup>                                        | 1607.6(13)                                                                   |
| <i>Z</i>                                                     | 4                                                                            |
| $\rho_{\text{calc}}$ /cm <sup>3</sup>                        | 1.324                                                                        |
| $\mu$ /mm <sup>-1</sup>                                      | 3.008                                                                        |
| F(000)                                                       | 680.0                                                                        |
| Crystal size/mm <sup>3</sup>                                 | 0.1 × 0.1 × 0.1                                                              |
| Radiation                                                    | CuK $\alpha$ ( $\lambda$ = 1.54184)                                          |
| 2 $\Theta$ range for data collection/°                       | 13.272 to 136.93                                                             |
| Index ranges                                                 | -10 ≤ <i>h</i> ≤ 10, -10 ≤ <i>k</i> ≤ 12, -14 ≤ <i>l</i> ≤ 21                |
| Reflections collected                                        | 10708                                                                        |
| Independent reflections                                      | 2911 [ <i>R</i> <sub>int</sub> = 0.0326, <i>R</i> <sub>sigma</sub> = 0.0315] |
| Data/restraints/parameters                                   | 2911/0/193                                                                   |
| Goodness-of-fit on <i>F</i> <sup>2</sup>                     | 1.079                                                                        |
| Final <i>R</i> indexes [ <i>I</i> ≥ 2 $\sigma$ ( <i>I</i> )] | <i>R</i> <sub>1</sub> = 0.0232, <i>wR</i> <sub>2</sub> = 0.0589              |
| Final <i>R</i> indexes [all data]                            | <i>R</i> <sub>1</sub> = 0.0236, <i>wR</i> <sub>2</sub> = 0.0590              |
| Largest diff. peak/hole / e Å <sup>-3</sup>                  | 0.34/-0.27                                                                   |
| Flack parameter                                              | 0.034(6)                                                                     |

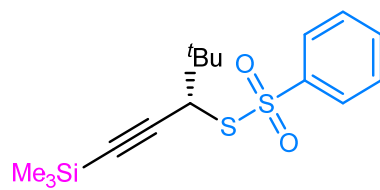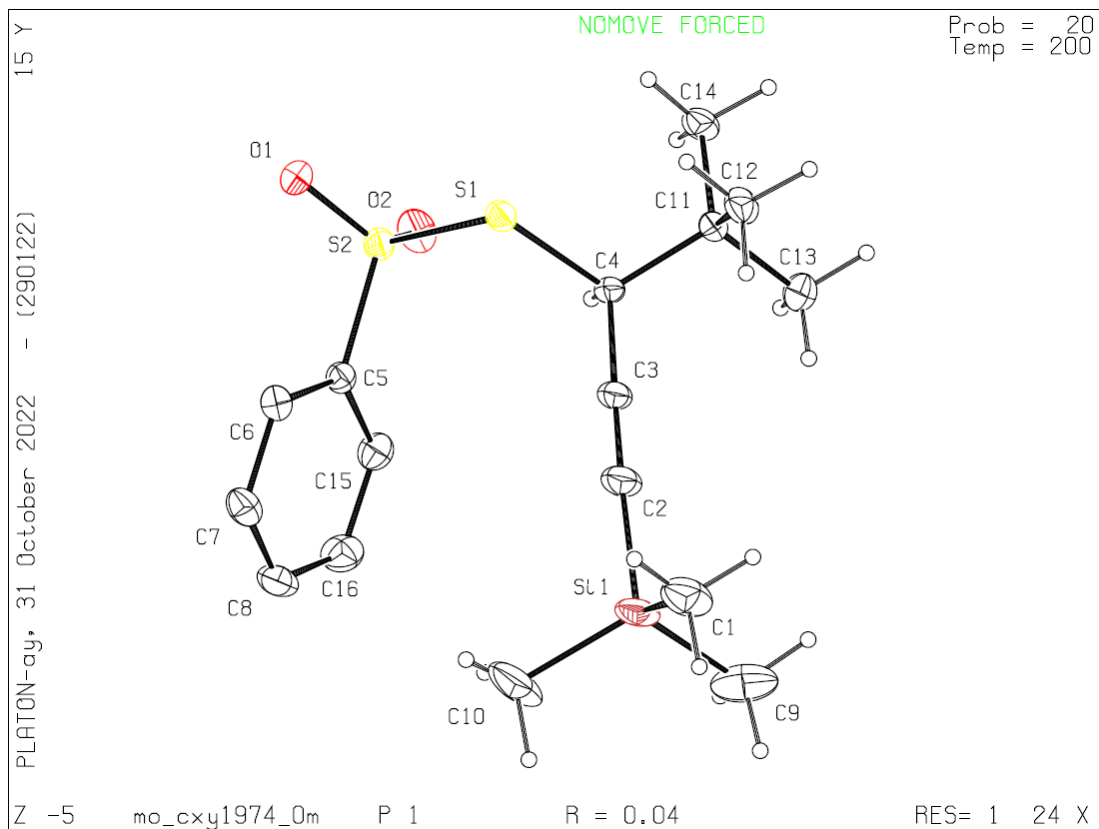

**Supplementary Fig. 6' | The X-ray structure of 52 (CCDC 2213037, 50% probability ellipsoids).**

**Supplementary Table 10 | Crystal data and structure refinement for Compound 52.**

|                                                              |                                                                              |
|--------------------------------------------------------------|------------------------------------------------------------------------------|
| Empirical formula                                            | C <sub>16</sub> H <sub>24</sub> O <sub>2</sub> S <sub>2</sub> Si             |
| Formula weight                                               | 340.56                                                                       |
| Temperature/K                                                | 200.0(2)                                                                     |
| Crystal system                                               | triclinic                                                                    |
| Space group                                                  | <i>P</i> <sub>1</sub>                                                        |
| <i>a</i> /Å                                                  | 9.4425(3)                                                                    |
| <i>b</i> /Å                                                  | 10.3552(4)                                                                   |
| <i>c</i> /Å                                                  | 10.7218(4)                                                                   |
| $\alpha$ /°                                                  | 91.4010(10)                                                                  |
| $\beta$ /°                                                   | 92.7930(10)                                                                  |
| $\gamma$ /°                                                  | 111.4310(10)                                                                 |
| Volume/Å <sup>3</sup>                                        | 973.71(6)                                                                    |
| <i>Z</i>                                                     | 2                                                                            |
| $\rho_{\text{calc}}$ /cm <sup>3</sup>                        | 1.162                                                                        |
| $\mu$ /mm <sup>-1</sup>                                      | 0.336                                                                        |
| F(000)                                                       | 364.0                                                                        |
| Crystal size/mm <sup>3</sup>                                 | 0.34 × 0.29 × 0.28                                                           |
| Radiation                                                    | MoK $\alpha$ ( $\lambda$ = 0.71073)                                          |
| 2 $\Theta$ range for data collection/°                       | 4.644 to 56.706                                                              |
| Index ranges                                                 | -12 ≤ <i>h</i> ≤ 12, -13 ≤ <i>k</i> ≤ 13, -14 ≤ <i>l</i> ≤ 14                |
| Reflections collected                                        | 38244                                                                        |
| Independent reflections                                      | 9568 [ <i>R</i> <sub>int</sub> = 0.0487, <i>R</i> <sub>sigma</sub> = 0.0353] |
| Data/restraints/parameters                                   | 9568/3/391                                                                   |
| Goodness-of-fit on <i>F</i> <sup>2</sup>                     | 1.050                                                                        |
| Final <i>R</i> indexes [ <i>I</i> ≥ 2 $\sigma$ ( <i>I</i> )] | <i>R</i> <sub>1</sub> = 0.0449, <i>wR</i> <sub>2</sub> = 0.1225              |
| Final <i>R</i> indexes [all data]                            | <i>R</i> <sub>1</sub> = 0.0517, <i>wR</i> <sub>2</sub> = 0.1264              |
| Largest diff. peak/hole / e Å <sup>-3</sup>                  | 0.44/-0.35                                                                   |
| Flack parameter                                              | -0.01(3)                                                                     |

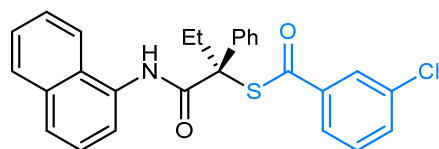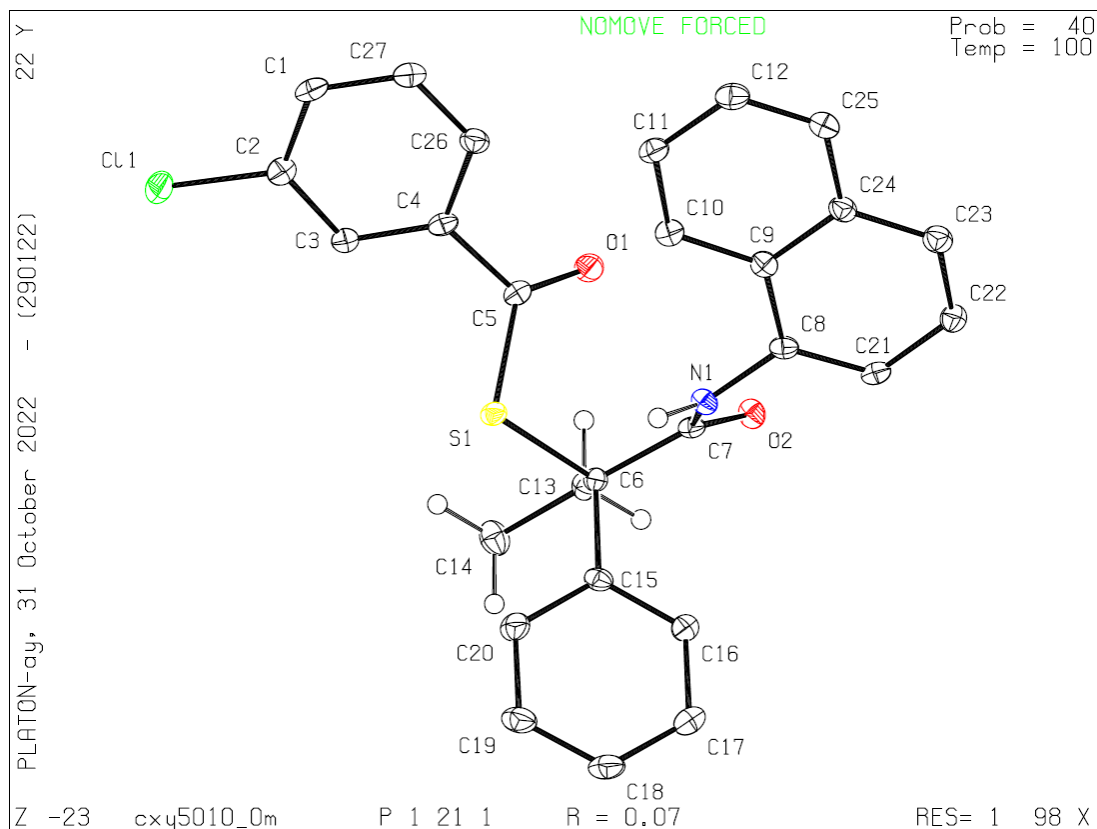

**Supplementary Fig. 7' | The X-ray structure of 83 (CCDC 2213038, 50% probability ellipsoids).**

**Supplementary Table 11 | Crystal data and structure refinement for Compound 83.**

|                                                              |                                                                              |
|--------------------------------------------------------------|------------------------------------------------------------------------------|
| Empirical formula                                            | C <sub>27</sub> H <sub>22</sub> ClNO <sub>2</sub> S                          |
| Formula weight                                               | 459.96                                                                       |
| Temperature/K                                                | 100.0(2)                                                                     |
| Crystal system                                               | monoclinic                                                                   |
| Space group                                                  | <i>P</i> 2 <sub>1</sub>                                                      |
| <i>a</i> /Å                                                  | 11.6349(7)                                                                   |
| <i>b</i> /Å                                                  | 9.8818(6)                                                                    |
| <i>c</i> /Å                                                  | 19.6807(11)                                                                  |
| $\alpha$ /°                                                  | 90                                                                           |
| $\beta$ /°                                                   | 92.263(3)                                                                    |
| $\gamma$ /°                                                  | 90                                                                           |
| Volume/Å <sup>3</sup>                                        | 2261.0(2)                                                                    |
| <i>Z</i>                                                     | 4                                                                            |
| $\rho_{\text{calc}}$ /cm <sup>3</sup>                        | 1.351                                                                        |
| $\mu$ /mm <sup>-1</sup>                                      | 1.682                                                                        |
| F(000)                                                       | 960.0                                                                        |
| Crystal size/mm <sup>3</sup>                                 | 0.28 × 0.03 × 0.03                                                           |
| Radiation                                                    | GaK $\alpha$ ( $\lambda$ = 1.34139)                                          |
| 2 $\Theta$ range for data collection/°                       | 3.908 to 114.118                                                             |
| Index ranges                                                 | -14 ≤ <i>h</i> ≤ 14, -12 ≤ <i>k</i> ≤ 12, -24 ≤ <i>l</i> ≤ 24                |
| Reflections collected                                        | 49135                                                                        |
| Independent reflections                                      | 9250 [ <i>R</i> <sub>int</sub> = 0.0759, <i>R</i> <sub>sigma</sub> = 0.0501] |
| Data/restraints/parameters                                   | 9250/3/585                                                                   |
| Goodness-of-fit on F <sup>2</sup>                            | 1.141                                                                        |
| Final <i>R</i> indexes [ <i>I</i> ≥ 2 $\sigma$ ( <i>I</i> )] | <i>R</i> <sub>1</sub> = 0.0697, <i>wR</i> <sub>2</sub> = 0.1826              |
| Final <i>R</i> indexes [all data]                            | <i>R</i> <sub>1</sub> = 0.0729, <i>wR</i> <sub>2</sub> = 0.1859              |
| Largest diff. peak/hole / e Å <sup>-3</sup>                  | 0.32/-0.72                                                                   |
| Flack parameter                                              | -0.02(2)                                                                     |

## 12. Computational studies

### 12.1. Computational Details

All density functional theory (DFT) calculation results are obtained with Gaussian 16 program<sup>15</sup>. Default SCF convergence criteria, optimization convergence criteria and integral grid parameters for Gaussian 16 are applied unless otherwise stated. (5d,7f) keyword in Gaussian 16 was used. Geometry optimizations are conducted with B3LYP functional<sup>16,17</sup>, employing the D3 version of Grimme's dispersion corrections<sup>18</sup> with Becke-Johnson damping<sup>19</sup>. LANL2DZ basis set<sup>20-23</sup> is used for copper and 6-31G(d) basis set is used for all other light atoms. Single-point energies and solvent effects at toluene and diethyl ether are also evaluated with B3LYP functional with Grimme's dispersion corrections and Becke-Johnson damping. SDD basis set<sup>20,24-27</sup> is used for copper and 6-311+G(d,p) basis set is used for all other light atoms. The solvation energies are calculated with a self-consistent reaction field (SCRF) using the SMD implicit solvent model<sup>28</sup>. Frequency analysis is also performed at the same level of theory as geometry optimization using harmonic oscillator model to confirm whether optimized stationary points are either local minimum or transition state, as well as to evaluate zero-point vibrational energies and thermal corrections for enthalpies and free energies at 298.15 K. Mulliken spin distribution is obtained at the same level of theory as geometry optimization.

In addition, geometry optimization, frequency analysis and single point energy of open-shell transition states and local minimums are calculated with unrestricted DFT methods, while same computations for closed-shell structures are performed with restricted DFT methods. Wavefunction stability test at the same level of theory as geometry optimizations is employed to ensure that the SCF converged wavefunction is stable.

To correct the Gibbs free energies under 1 atm to the standard state in solution (1 mol/L), a correction of  $RT\ln(c_s/c_g)$  is added to energies of all species.  $c_s$  stands for the standard molar concentration in solution (1 mol/L),  $c_g$  stands for the standard molar concentration in gas phase (about 0.040876 mol/L), and  $R$  is the gas constant. For calculated intermediates at the standard state of 1 mol/L at 298.15 K, the correction value equaling to 1.89 kcal/mol is used.

The 3D diagrams of optimized structures shown in this supplementary information for computations are generated with CYLview software<sup>29</sup>. Cartesian coordinates of computed species are included in the Computational Archives.



## 12.2. Discussion on Cu-Mediated C–S Bonding Mechanism of Secondary Benzyl Radical and Benzothioate

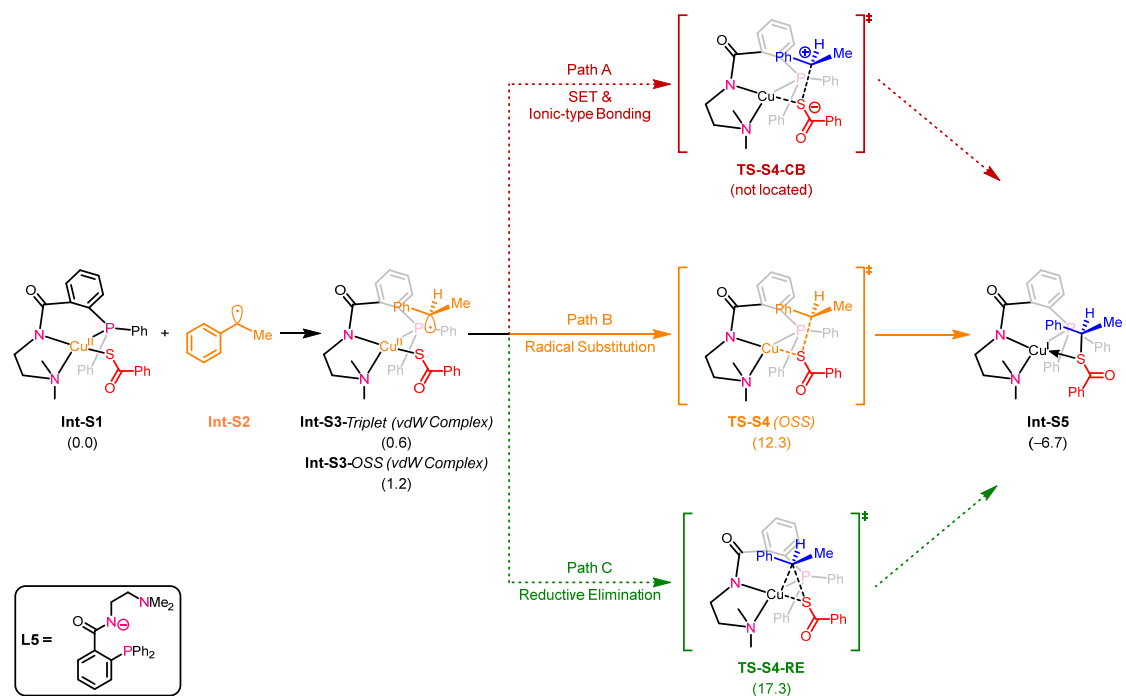

**Supplementary Fig. 10 | DFT exploration of C–S bond formation pathways with **L5Cu(II)**(benzoylthiolate) species **Int-S1** and secondary benzyl radical **Int-S2**.** Free energies in kcal/mol are shown in parentheses, which are compared to **Int-S1** and **Int-S2**.

DFT calculations in model systems are performed to study Cu-mediated C–S bond formation pathway for secondary benzyl radical and benzothioate. Simplified achiral *N,N,P*-ligand based on **L\*5** is used for calculations in this section.

The proposed C–S bond formation pathways between **L5Cu(II)**(benzoylthiolate) species **Int-S1** and secondary benzyl radical **Int-S2** include three major possibilities: sequential SET and ion-type C–S bonding (path A in **Supplementary Fig. 10**), outer-sphere radical-substitution-type C–S bond formation via **TS-S4** (path B in **Supplementary Fig. 10**), and reductive elimination via **TS-S4-RE** (path C in **Supplementary Fig. 10**).

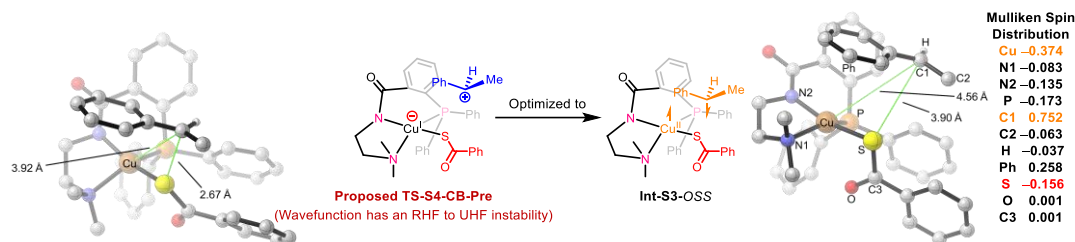

**Supplementary Fig. 11 | Proposed closed-shell structure of pre-intermediate ion-type C–S bond formation and further geometry optimization results.** Trivial hydrogen atoms are omitted for clarity.

Regarding path A, the ion-type C–S bonding, the transition state cannot be located after extensive efforts. The structure of the pre-intermediate prior to the proposed ion-type C–S bonding transition state, **Proposed TS-S4-CB-Pre**, has an RHF to UHF ‘wavefunction’ instability, indicating that such closed-shell singlet, zwitterionic intermediate does not exist at computed potential energy surface. Further open-shell singlet optimization with unrestricted Hartree-Fock (UHF) calculation of **Proposed TS-S4-CB-Pre** leads to the open-shell singlet intermediate **Int-S3-OSS**, which is a VdW (van der Waals) complex of **L5Cu(II)**(benzoylthiolate) species **Int-S1** and secondary benzyl radical **Int-S2**, and also the pre-intermediate for the radical substitution C–S bond formation. Also, the Mulliken spin distribution indicates the open-shell singlet diradical nature of **Int-S3-OSS**. Based on these results, the ion-type C–S bonding pathway is not operative. (**Supplementary Fig. 11**)

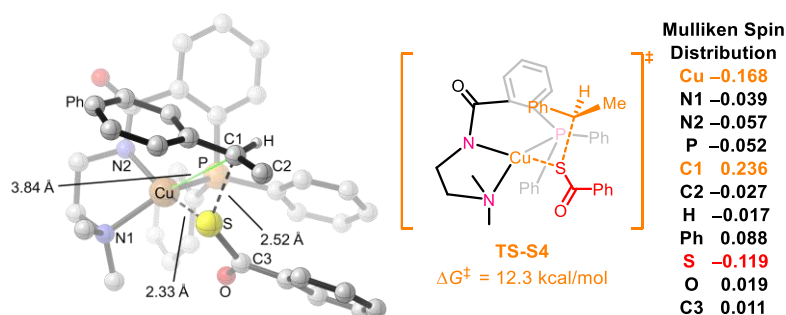

**Supplementary Fig. 12 | Located radical-substitution-type C–S bond formation transition state.** Trivial hydrogen atoms are omitted for clarity.

Regarding path B, the radical-substitution-type C–S bonding, the transition state is located as **TS-S4**. The free energy barrier of C–S bond formation via **TS-S4** is 12.3 kcal/mol. The Mulliken spin distribution indicates the open-shell singlet nature of **TS-S4**. (**Supplementary Fig. 12**)

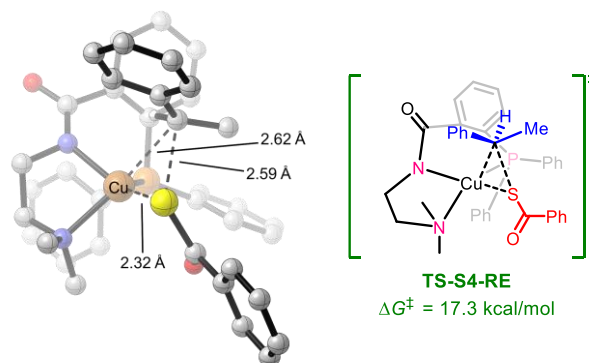

**Supplementary Fig. 13 | Located C–S reductive elimination transition state.** Trivial hydrogen atoms are omitted for clarity.

Regarding path C, C–S reductive elimination, the transition state is located as **TS-S4-RE**. This **TS-S4-RE** already has a stable wavefunction using RHF (restricted Hartree-Fock) calculation. This result illustrates that open-shell form of **TS-S4-RE** doesn't exist. The free energy barrier of C–S bond formation via **TS-S4-RE** is 17.3 kcal/mol, which is 5.0 kcal/mol unfavorable compared to radical-substitution-type C–S bond formation via **TS-S4**. (**Supplementary Fig. 13, Supplementary Table. 12**)

Based on the above calculations and discussions, Cu-mediated C–S bond formation for secondary benzyl radical and benzothioate via open-shell singlet radical substitution transition state **TS-S4** is the most favorable.

### 12.3. Discussion on Cu-Mediated C–S Bonding Mechanism of Tertiary Benzyl Radical and Benzothioate

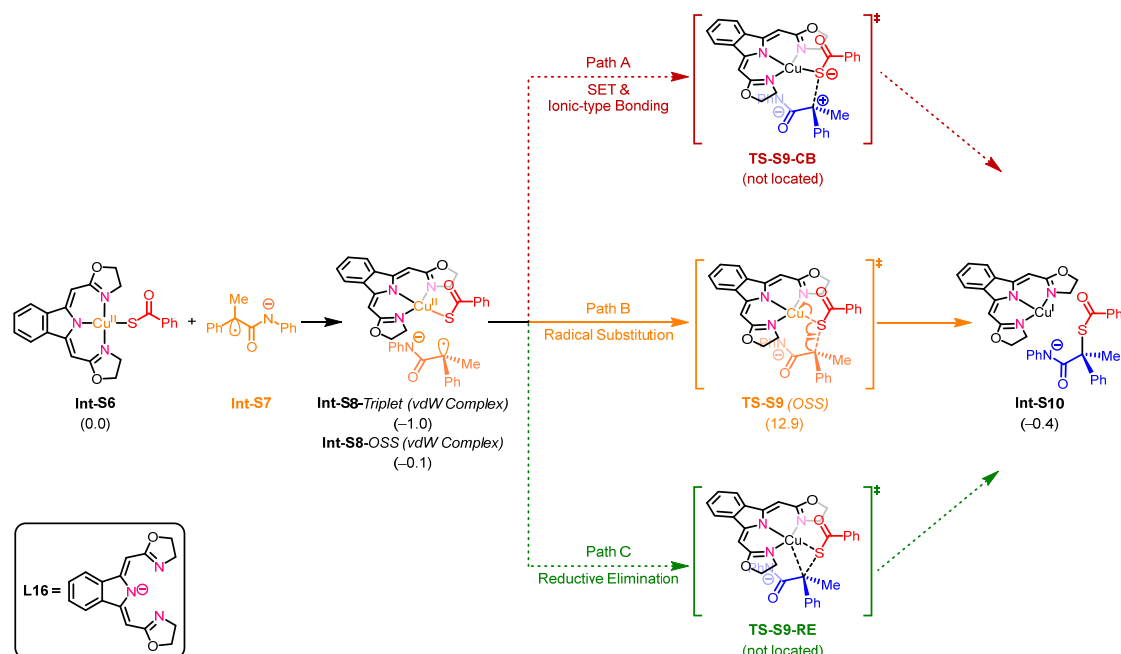

**Supplementary Fig. 14 | DFT exploration of C–S bond formation pathways with L16Cu(II)(benzoylthiolate) species Int-S6 and tertiary benzyl radical Int-S7. Free energies in kcal/mol are shown in parentheses, which are compared to Int-S6 and Int-S7.**

DFT calculations in model systems are performed to study Cu-mediated C–S bond formation pathway for tertiary benzyl radical and benzothioate. Simplified achiral *N,N,N*-ligand based on **L\*16** is used for calculations in this section.

The proposed C–S bond formation pathways between **L16Cu(II)(benzoylthiolate)** species **Int-S6** and tertiary benzyl radical **Int-S7** include three major possibilities: sequential SET and ion-type C–S bonding (path A in **Supplementary Fig. 14**), outer-sphere radical-substitution-type C–S bond formation via **TS-S9** (path B in **Supplementary Fig. 14**), and reductive elimination (path C in **Supplementary Fig. 14**).

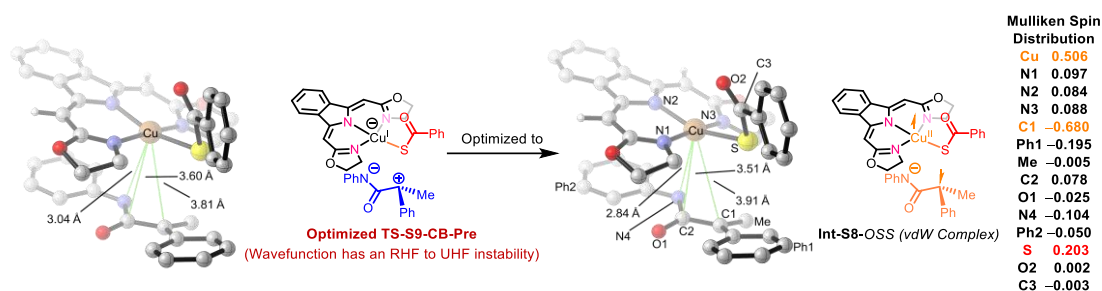

**Supplementary Fig. 15 | Optimized closed-shell structure of pre-intermediate ion-type C–S bond formation and further geometry optimization results.** Trivial hydrogen atoms are omitted for clarity.

Regarding path A, the ion-type C–S bonding, the transition state cannot be located after extensive efforts. The structure of the pre-intermediate prior to the proposed ion-type C–S bonding transition state can be located using restricted Hartree-Fock (RHF) calculation as **Optimized TS-S9-CB-Pre**. The sequential wavefunction test indicates that this **Optimized TS-S9-CB-Pre** has an RHF to UHF ‘wavefunction’ instability. Such closed-shell singlet, zwitterionic intermediate does not exist at computed potential energy surface. Further open-shell singlet optimization with unrestricted Hartree-Fock (UHF) calculation of **Optimized TS-S9-CB-Pre** leads to the open-shell singlet intermediate **Int-S8-OSS**, which is a VdW (van der Waals) complex of **L16Cu(II)**(benzoylthio) species **Int-S6** and tertiary benzyl radical **Int-S7**, and also the pre-intermediate for the radical substitution C–S bond formation. Mulliken spin distribution indicates the open-shell singlet diradical nature of **Int-S8-OSS**. Based on these results, the ion-type C–S bonding pathway is not operative. (**Supplementary Fig. 15**)

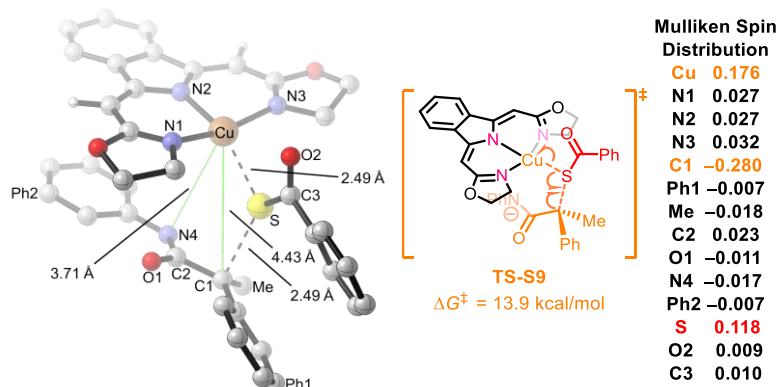

**Supplementary Fig. 16 | Located radical-substitution-type C–S bond formation transition state.** Trivial hydrogen atoms are omitted for clarity.

Regarding path B, the radical-substitution-type C–S bonding, the transition state is located as **TS-S9**. The free energy barrier of C–S bond formation via **TS-S4** is 13.9 kcal/mol compared to the favored VdW complex **Int-S8-Triplet**. The Mulliken spin distribution indicates the open-shell singlet nature of **TS-S9**. (**Supplementary Fig. 16**)

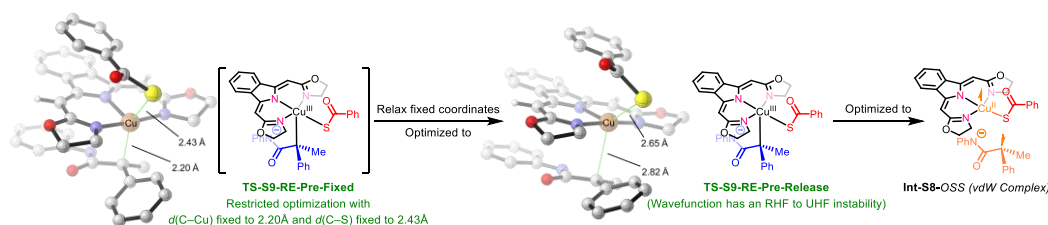

**Supplementary Fig. 17 | Results on sequential geometry optimizations for closed-shell structure of pre-intermediate C–S reductive elimination.** Trivial hydrogen atoms are omitted for clarity.

Regarding path C, C–S reductive elimination, the reductive elimination transition state cannot be located after extensive efforts. The pre-intermediate of reductive elimination, **TS-S9-RE-Pre-Fixed**, is firstly optimized with  $d(\text{C–Cu})$  fixed to 2.20 Å and  $d(\text{C–S})$  fixed to 2.43 Å in order to maintain the characteristics of the proposed Cu(III) structure during optimization. Sequential geometry optimization with full degrees of freedom leads to **TS-S9-RE-Pre-Release** with C–Cu bond length of 2.82 Å. Wavefunction test indicates that this **TS-S9-RE-Pre-Release** has an RHF to UHF ‘wavefunction’ instability. Further open-shell singlet optimization with unrestricted Hartree-Fock (UHF) calculation of **TS-S9-RE-Pre-Release** leads to **Int-S8-OSS**. Based on these results, the C–S reductive elimination pathway is not operative. (**Supplementary Fig. 17**)

Based on the above calculations and discussions, Cu-mediated C–S bond formation between tertiary benzyl radical and benzothioate via open-shell singlet radical substitution transition state **TS-S9** is the most favorable.

## 12.4. Table of Energies

**Supplementary Table 12** | Energies in **Supplementary Figs. 10, 12 and 14**. Zero-point correction (*ZPE*), thermal correction to enthalpy (*TCH*), thermal correction to Gibbs free energy (*TCG*), energies (*E*), enthalpies (*H*), and Gibbs free energies (*G*) (in Hartree) of the structures calculated at B3LYP-D3(BJ)/6-311+G(d,p)-SDD-SMD(Toluene)//B3LYP-D3(BJ)/6-31G(d)-LANL2DZ level of theory.

| Structure             | <i>ZPE</i> | <i>TCH</i> | <i>TCG</i> | <i>E</i>     | <i>H</i>     | <i>G</i>     | Imaginary Frequency |
|-----------------------|------------|------------|------------|--------------|--------------|--------------|---------------------|
| <b>Int-S1</b>         | 0.527361   | 0.562973   | 0.458709   | -2358.237425 | -2357.674452 | -2357.778716 |                     |
| <b>Int-S2</b>         | 0.143393   | 0.151750   | 0.110895   | -310.353457  | -310.201707  | -310.242562  |                     |
| <b>Int-S3-OSS</b>     | 0.672446   | 0.717195   | 0.592468   | -2668.608790 | -2667.891595 | -2668.016322 |                     |
| <b>Int-S3-Triplet</b> | 0.672460   | 0.717199   | 0.591489   | -2668.608809 | -2667.891610 | -2668.017320 |                     |
| <b>TS-S4</b>          | 0.672600   | 0.716539   | 0.593891   | -2668.592583 | -2667.876044 | -2667.998692 | 235.9 <i>i</i>      |
| <b>TS-S4-RE</b>       | 0.673177   | 0.717210   | 0.592332   | -2668.583021 | -2667.865811 | -2667.990689 | 104.6 <i>i</i>      |
| <b>Int-S5</b>         | 0.675801   | 0.719455   | 0.598784   | -2668.627689 | -2667.908234 | -2668.028905 |                     |

**Supplementary Table 13** | Energies in **Supplementary Figs. 14 and 16** Zero-point correction (*ZPE*), thermal correction to enthalpy (*TCH*), thermal correction to Gibbs free energy (*TCG*), energies (*E*), enthalpies (*H*), and Gibbs free energies (*G*) (in Hartree) of the structures calculated at B3LYP-D3(BJ)/6-311+G(d,p)-SDD-SMD(Diethyl Ether)//B3LYP-D3(BJ)/6-31G(d)-LANL2DZ level of theory.

| Structure             | <i>ZPE</i> | <i>TCH</i> | <i>TCG</i> | <i>E</i>     | <i>H</i>     | <i>G</i>     | Imaginary Frequency |
|-----------------------|------------|------------|------------|--------------|--------------|--------------|---------------------|
| <b>Int-S6</b>         | 0.383519   | 0.411261   | 0.322601   | -1873.966007 | -1873.554746 | -1873.643406 |                     |
| <b>Int-S7</b>         | 0.23856    | 0.253748   | 0.194709   | -709.748212  | -709.494464  | -709.553503  |                     |
| <b>Int-S8-OSS</b>     | 0.624067   | 0.667389   | 0.546065   | -2583.740099 | -2583.072710 | -2583.194034 |                     |
| <b>Int-S8-Triplet</b> | 0.624005   | 0.667356   | 0.544790   | -2583.740237 | -2583.072881 | -2583.195447 |                     |
| <b>TS-S9</b>          | 0.622438   | 0.665361   | 0.545773   | -2583.719100 | -2583.053739 | -2583.173327 | 201.8 <i>i</i>      |
| <b>Int-S10</b>        | 0.624152   | 0.667367   | 0.545544   | -2583.740048 | -2583.072681 | -2583.194504 |                     |

### 13. NMR spectra

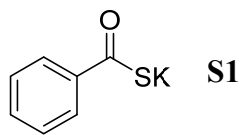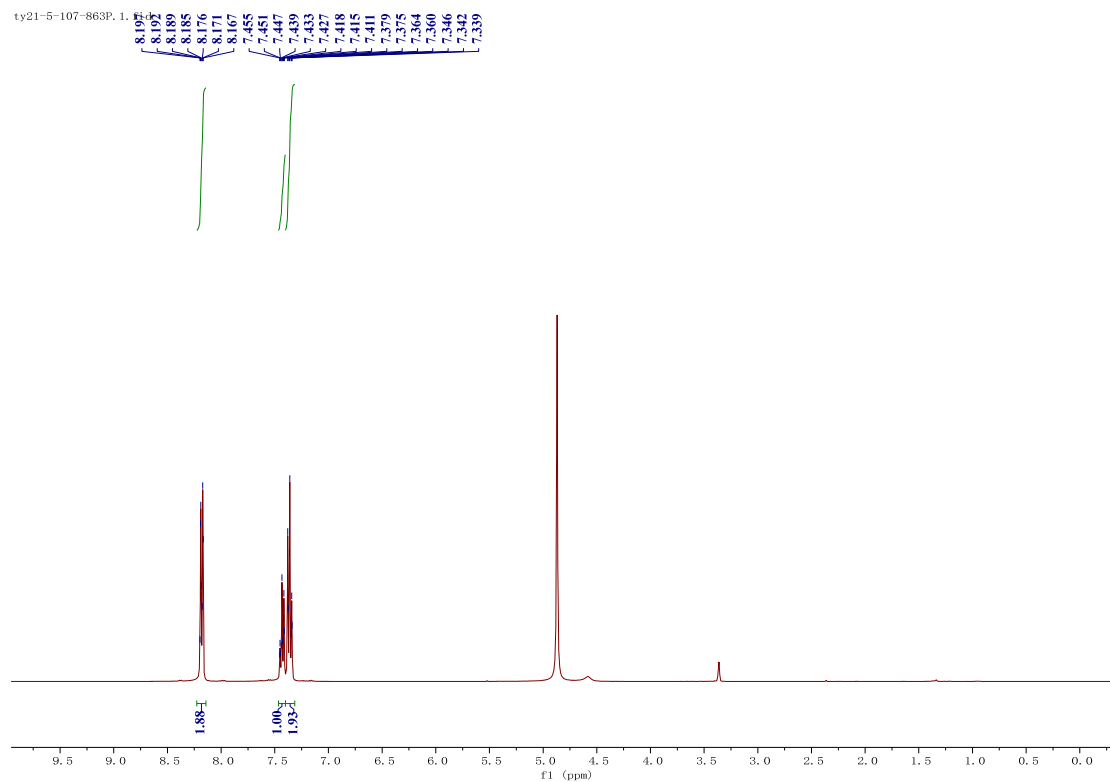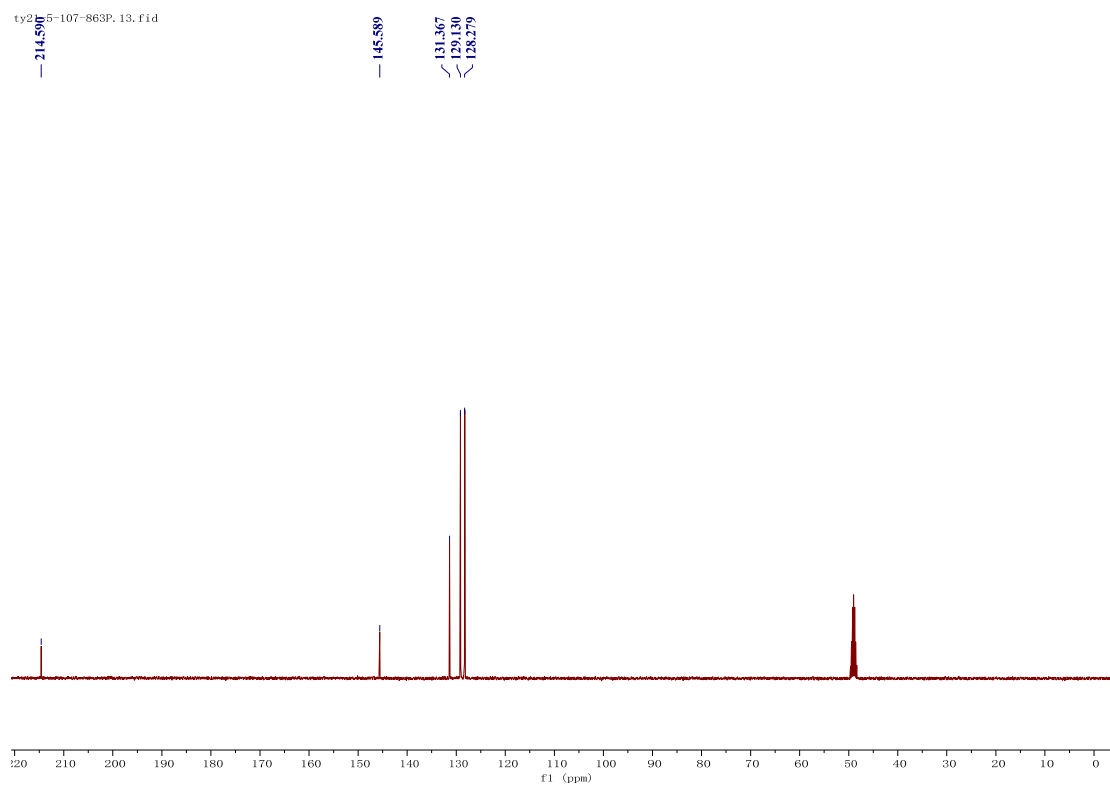



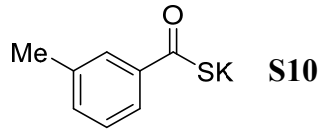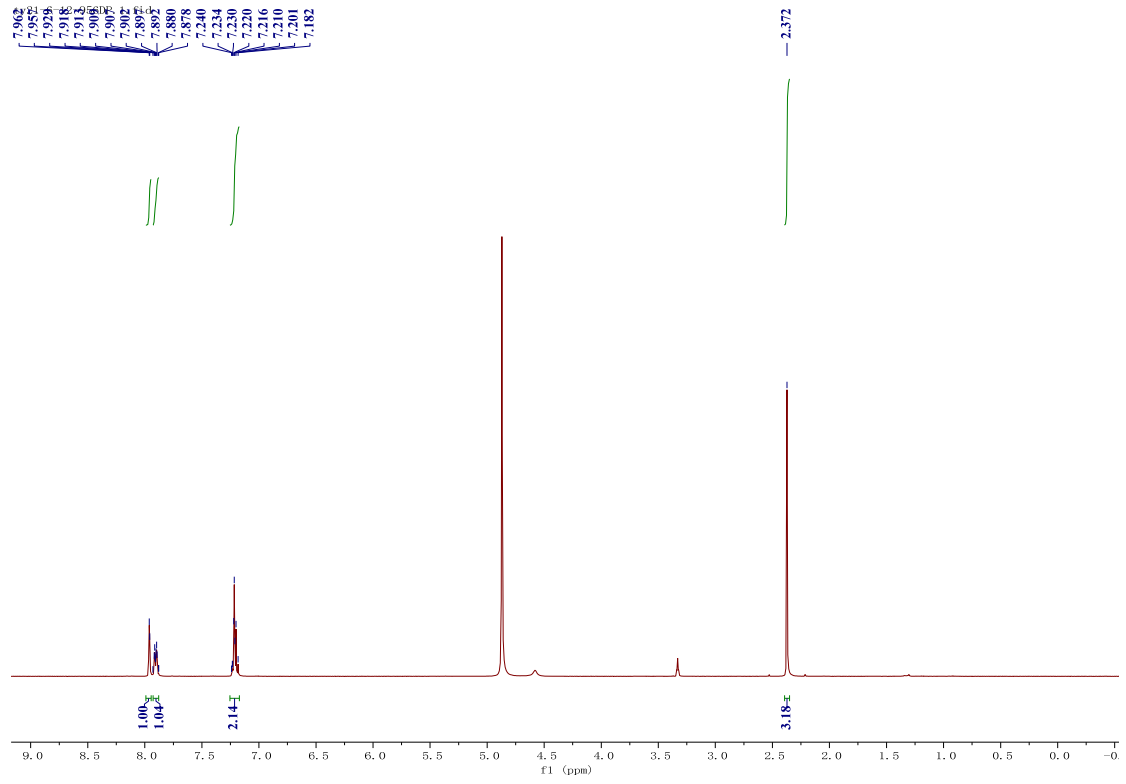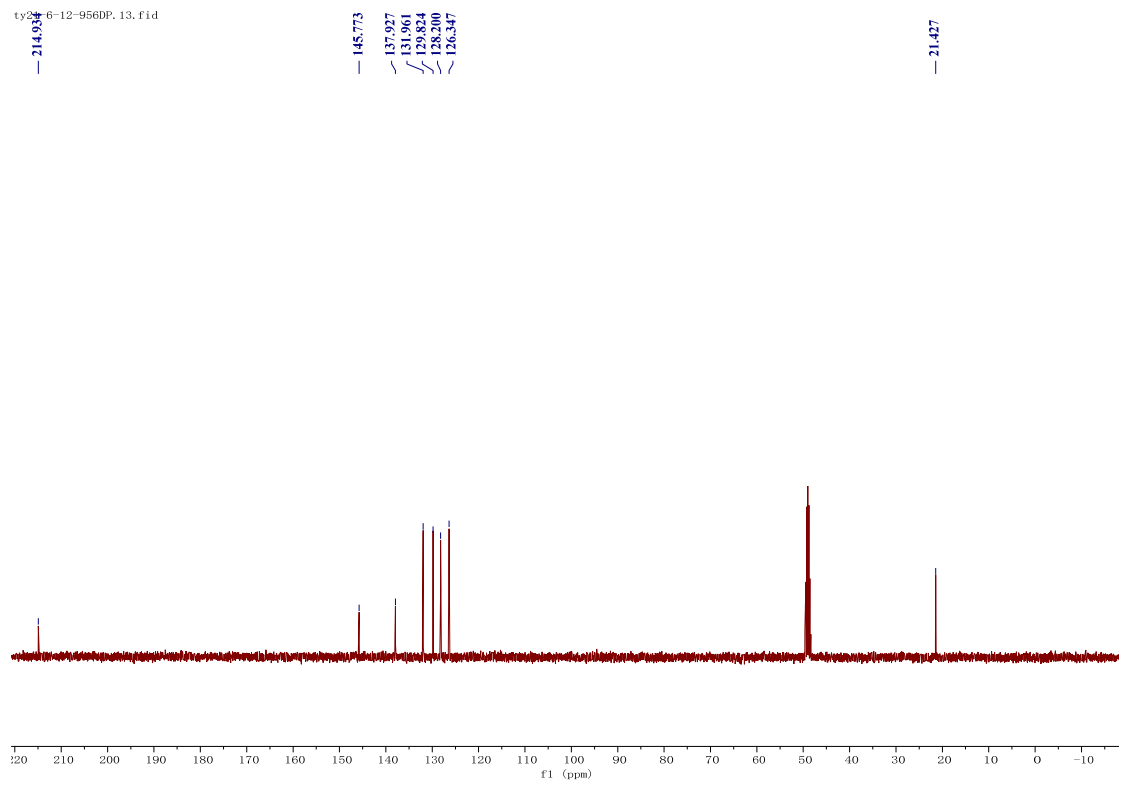

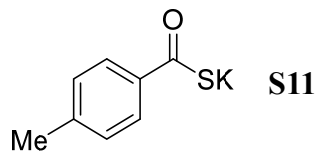

ty22-6-195-11390, 1, f1d

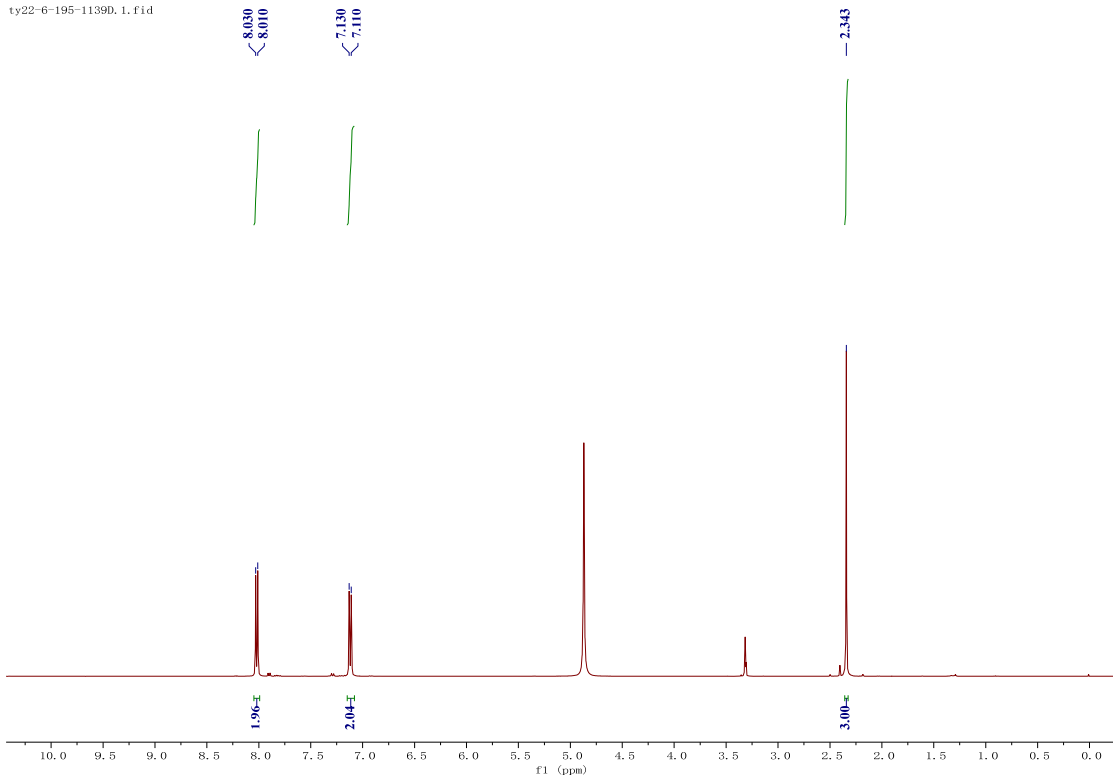

ty22-6-195-11390, 13, f1d

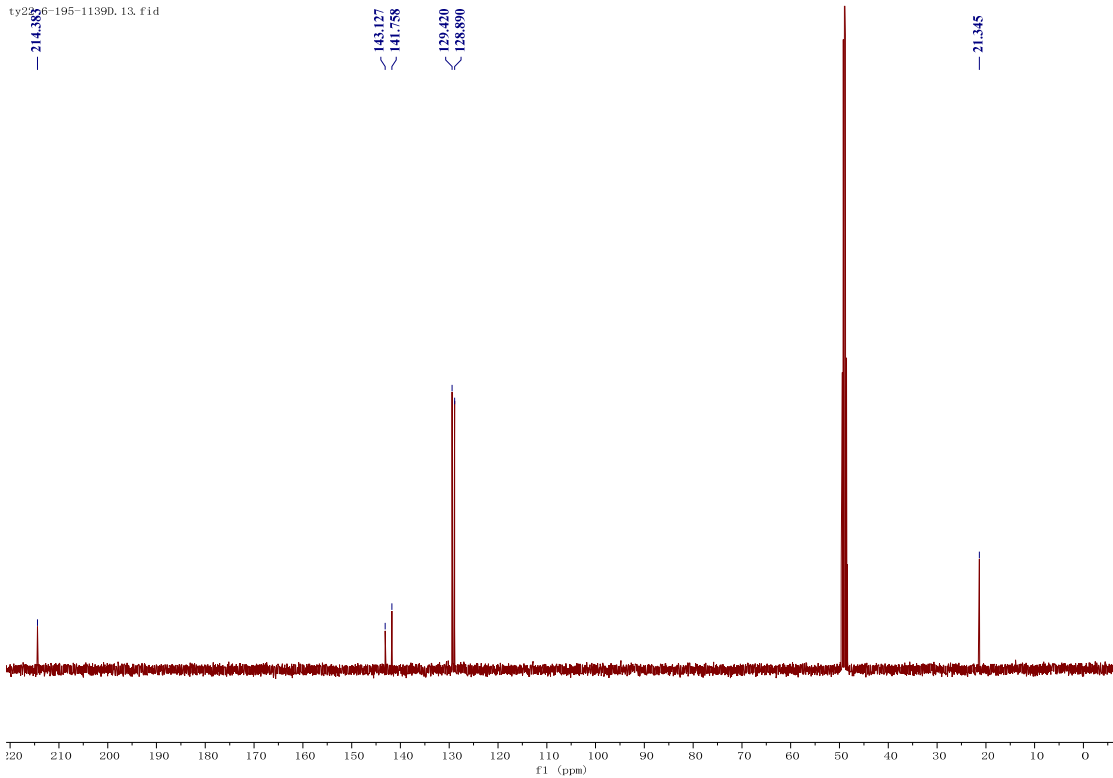

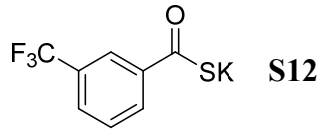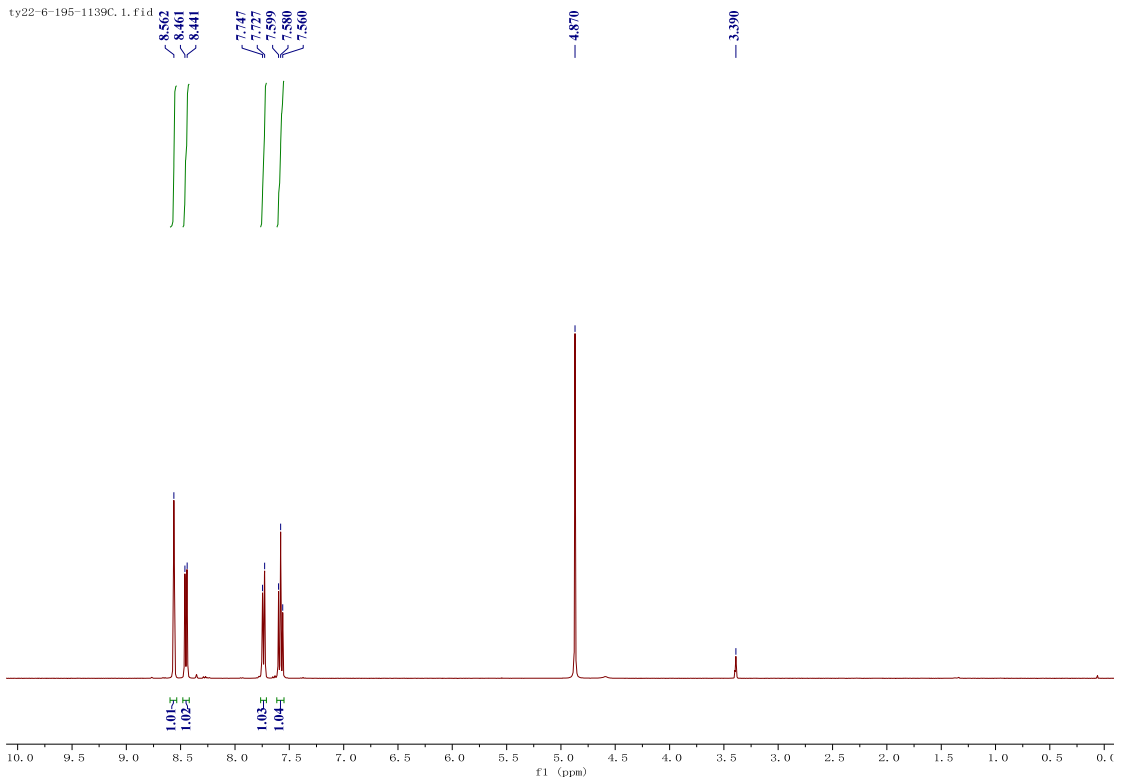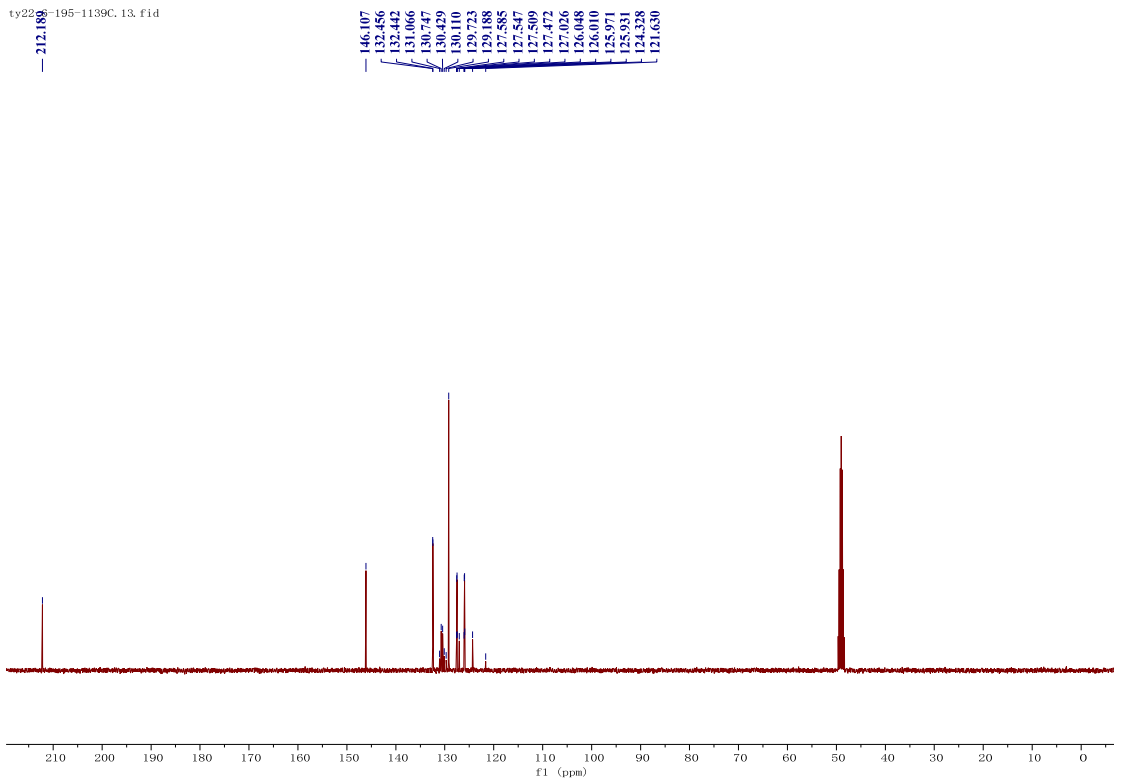

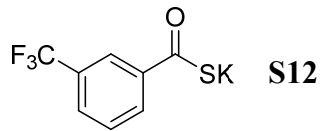

ty22-6-195-1139C\_19.f1d

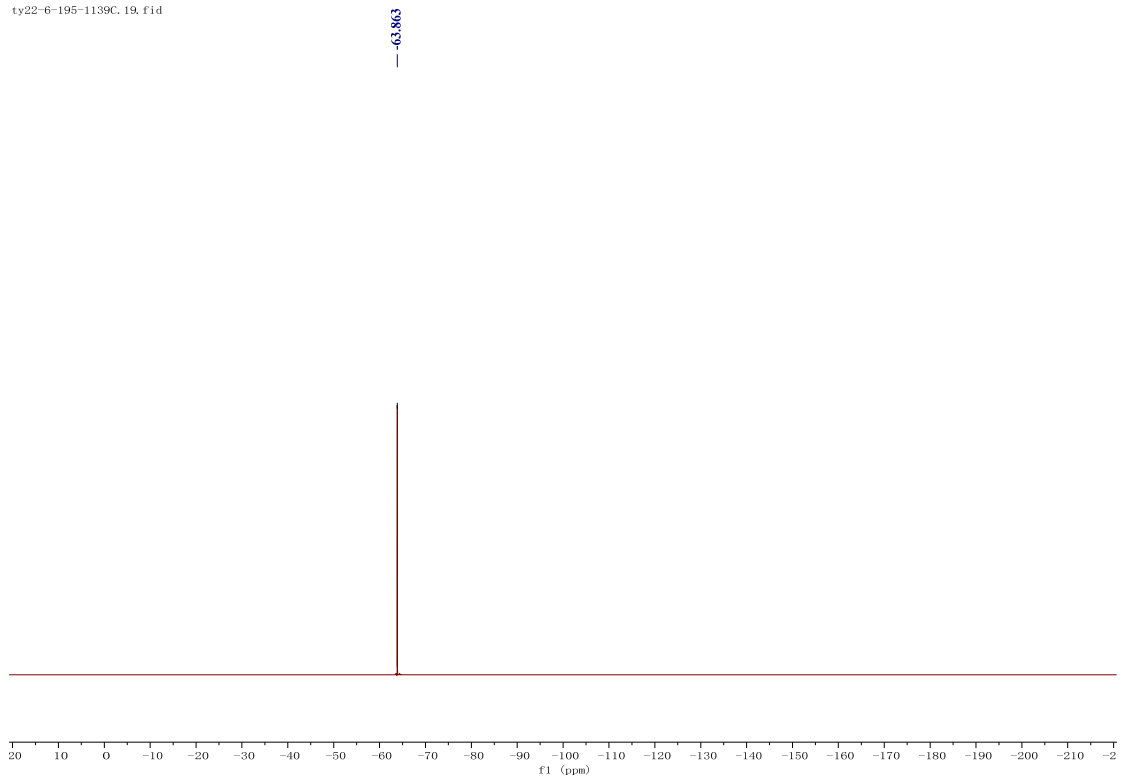

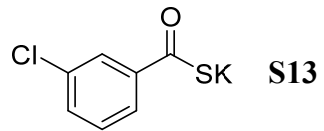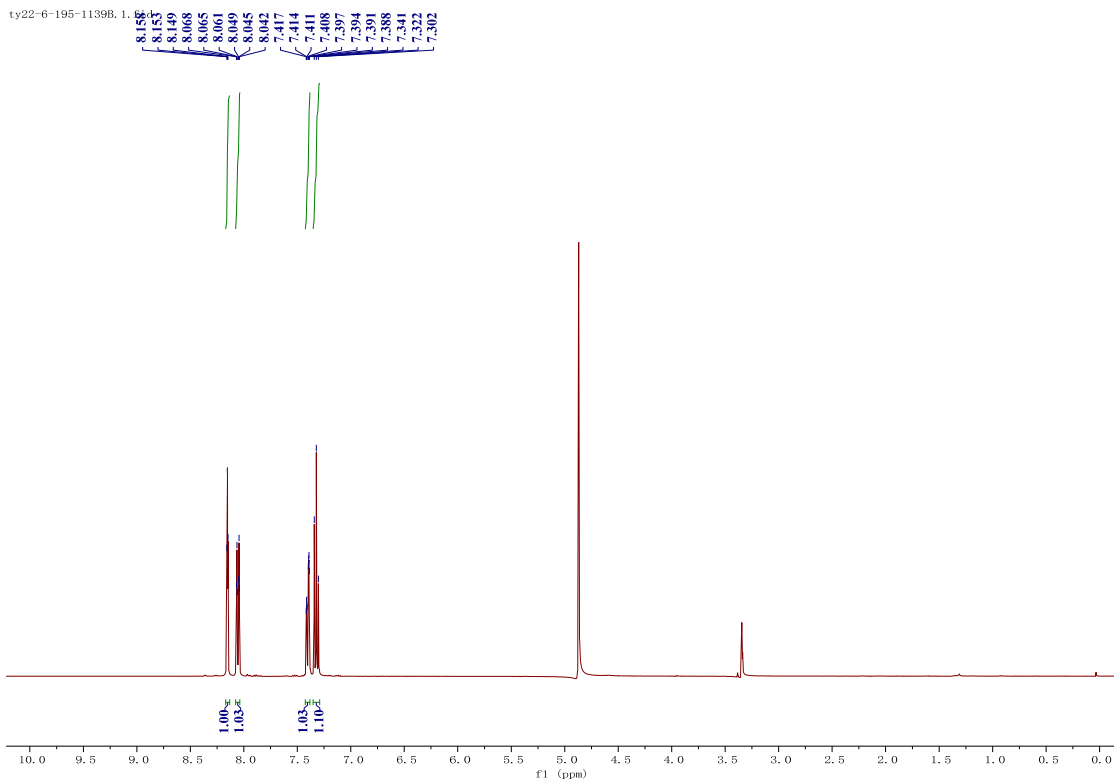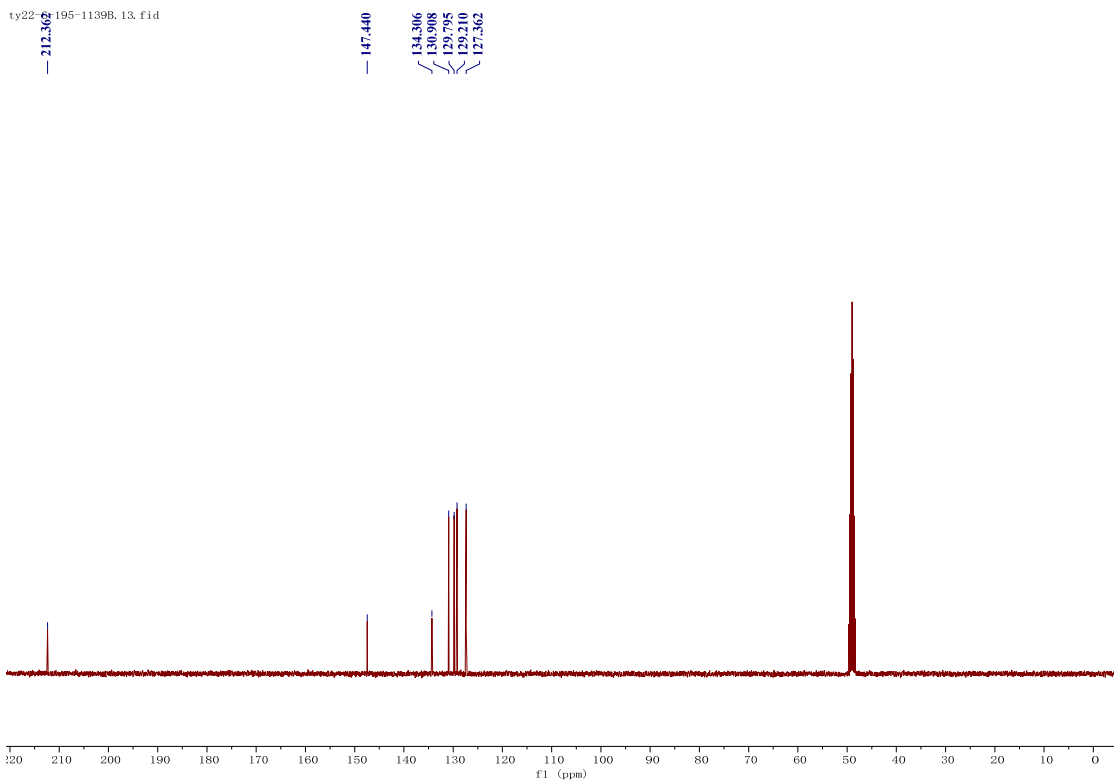

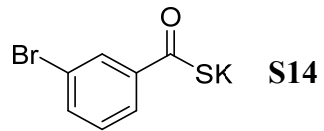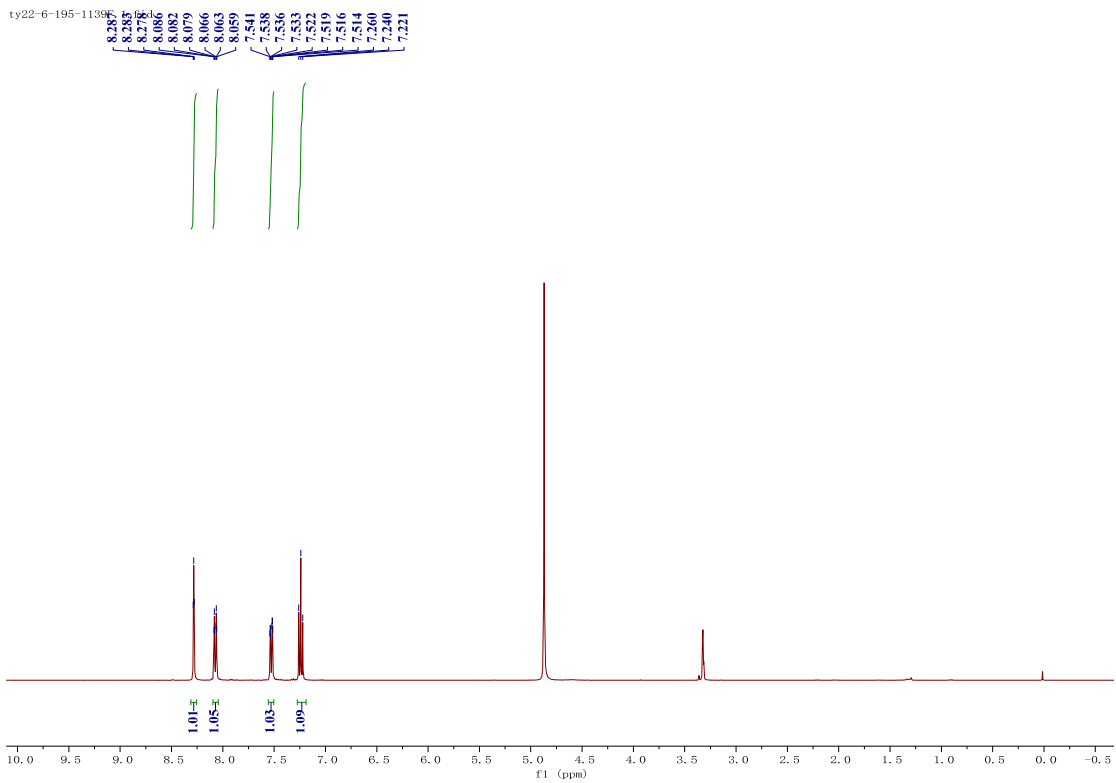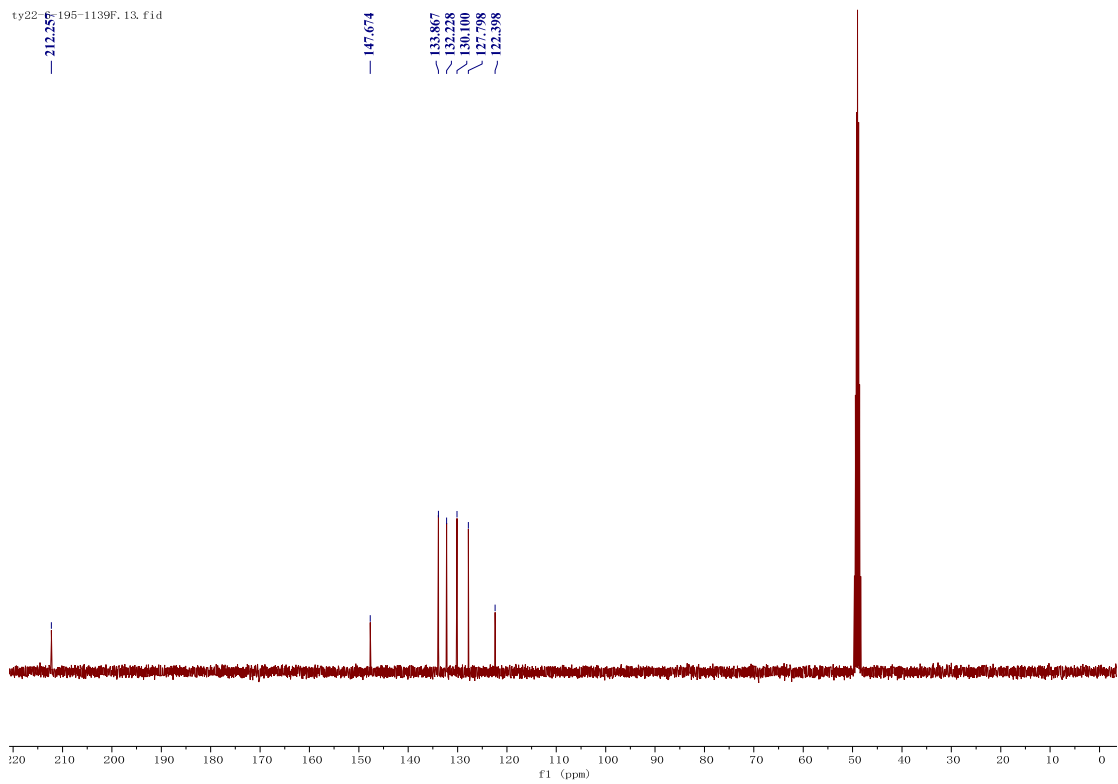

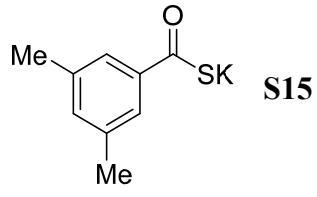

ty21-6-12-956M, 1, fid

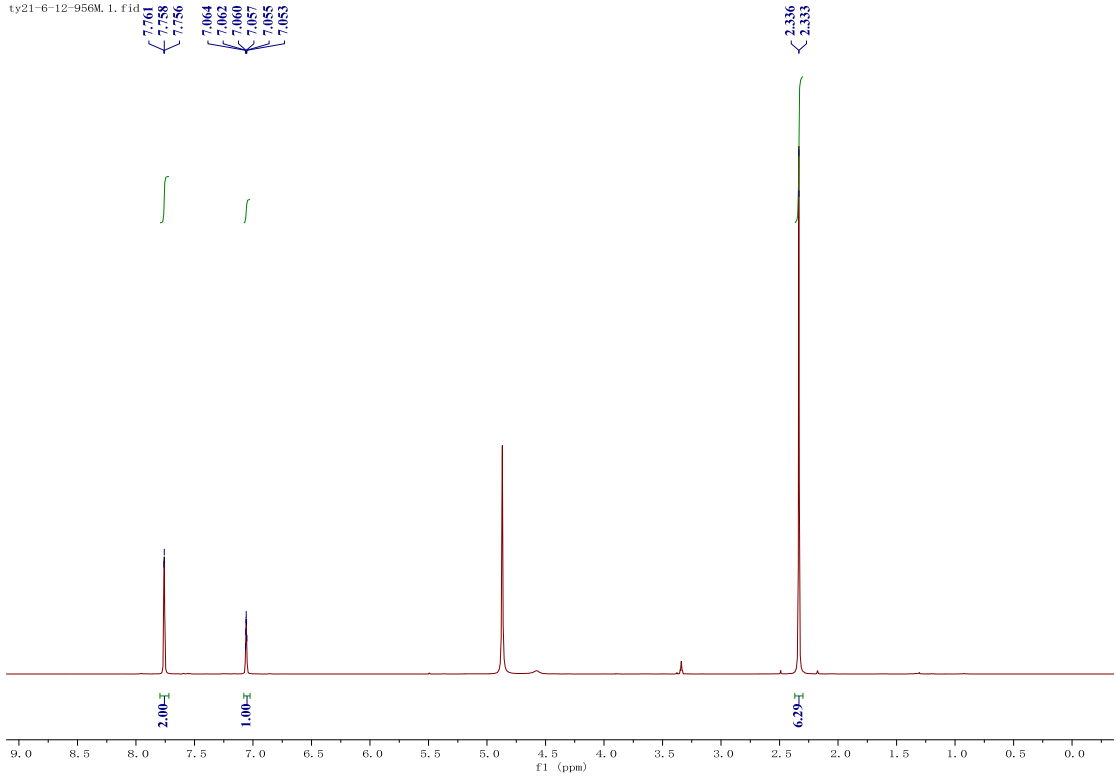

ty21-6-12-956M, 13, fid

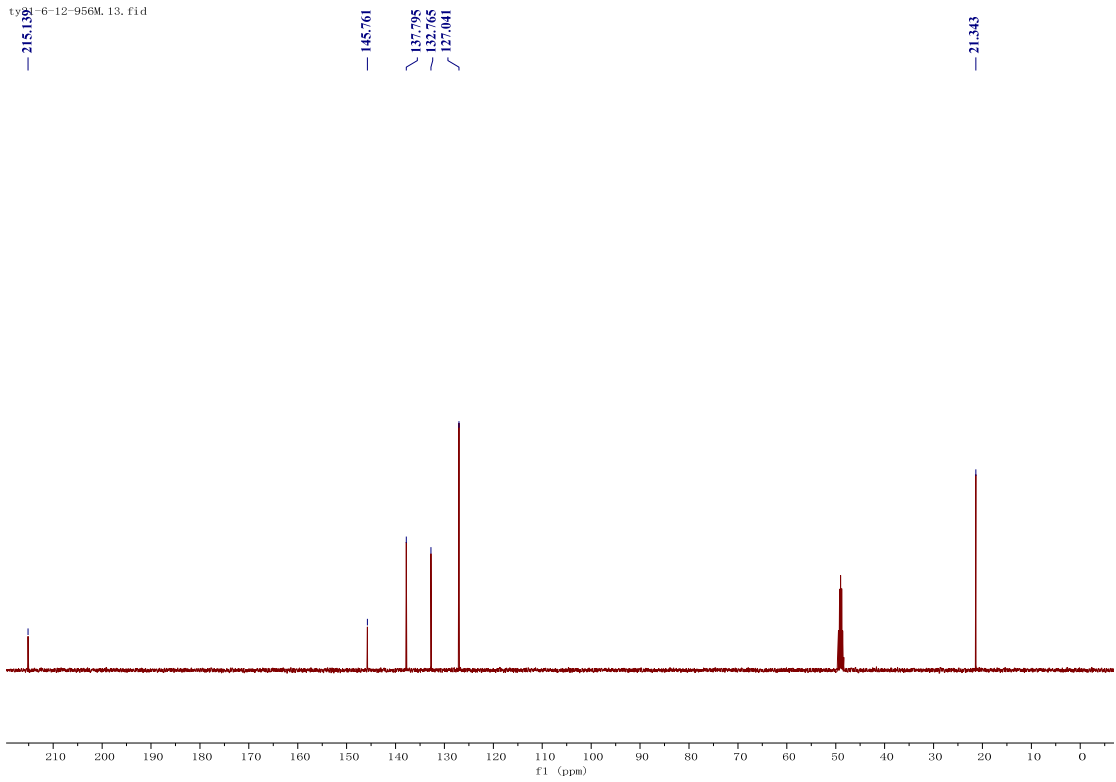

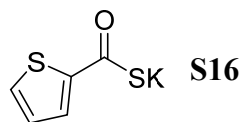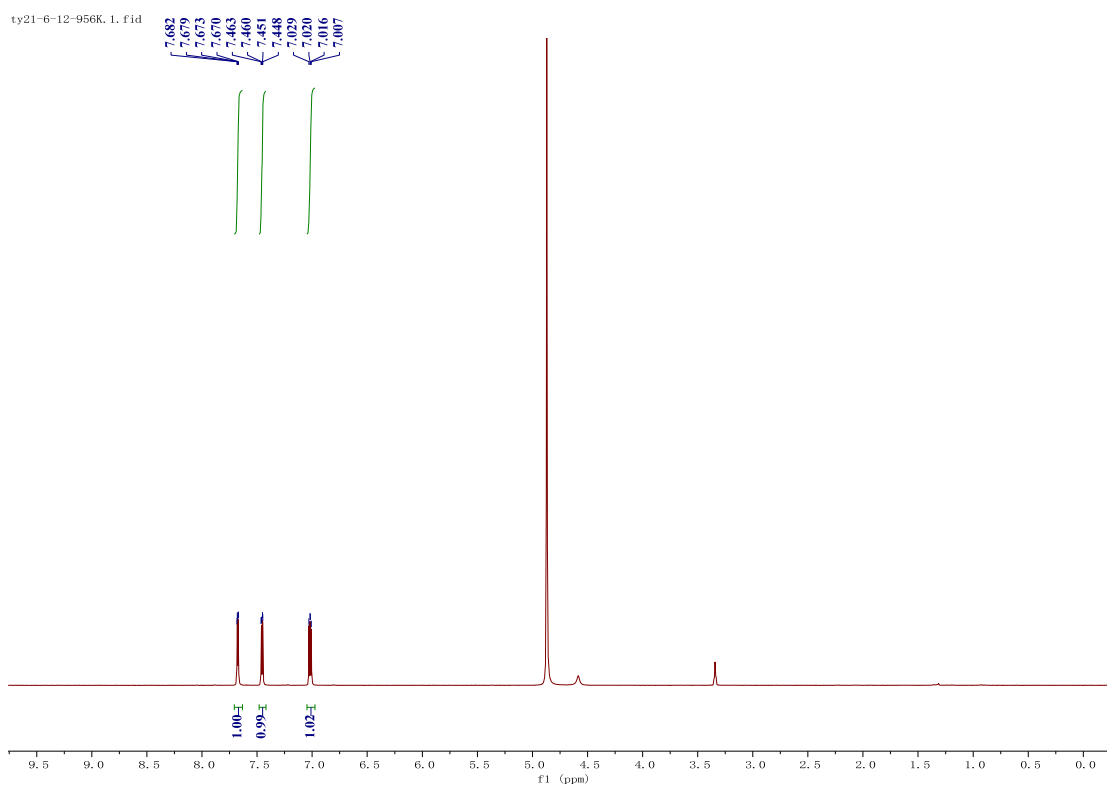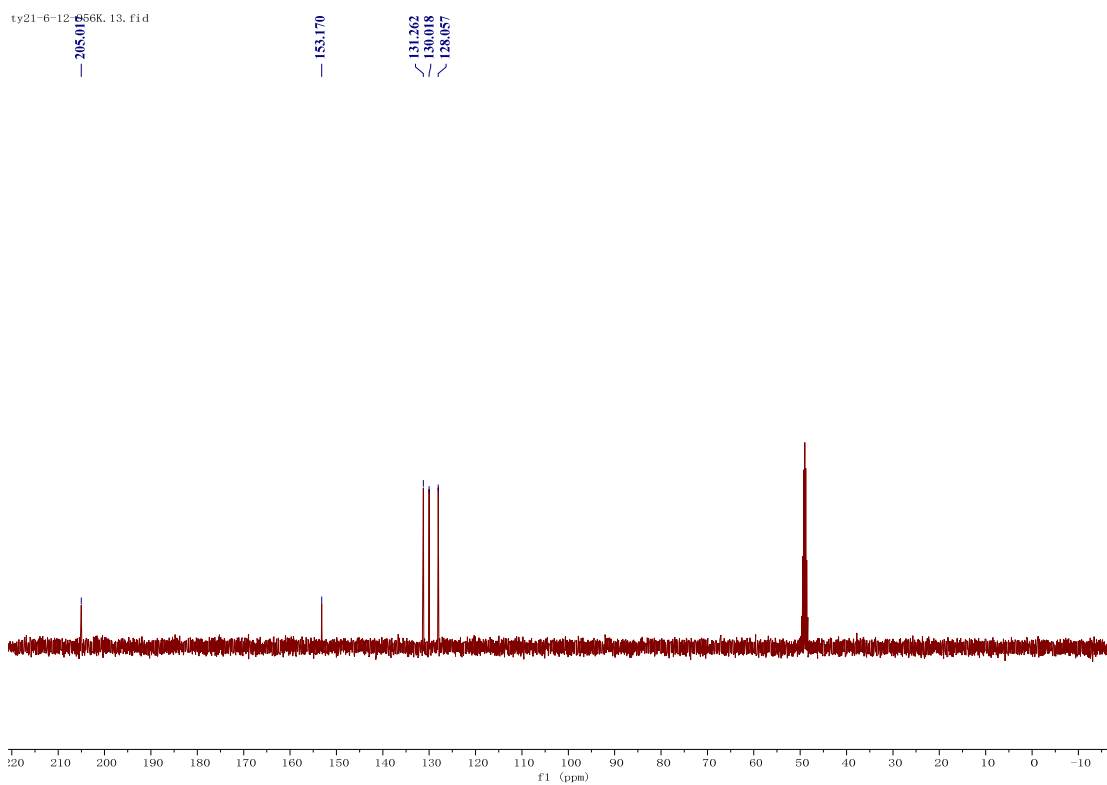



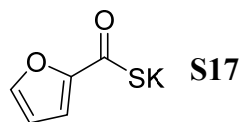

ty22-6-195-1139H.1.f1d

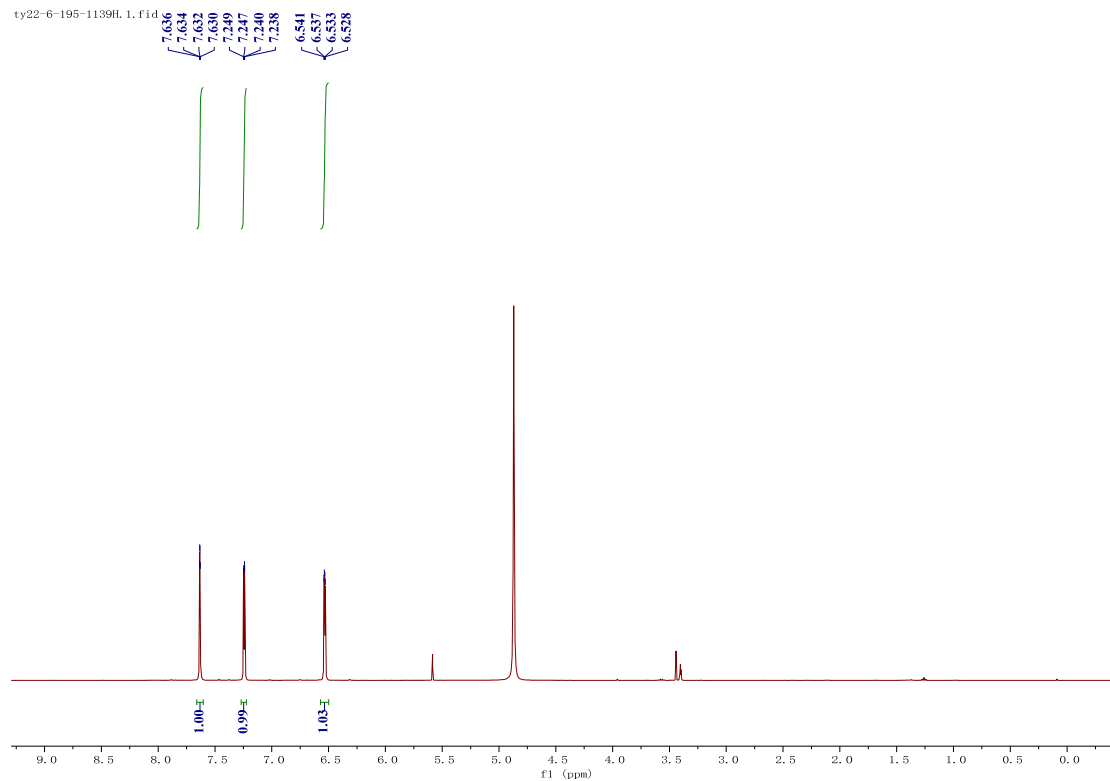

ty22-6-195-1139H.13.f1d

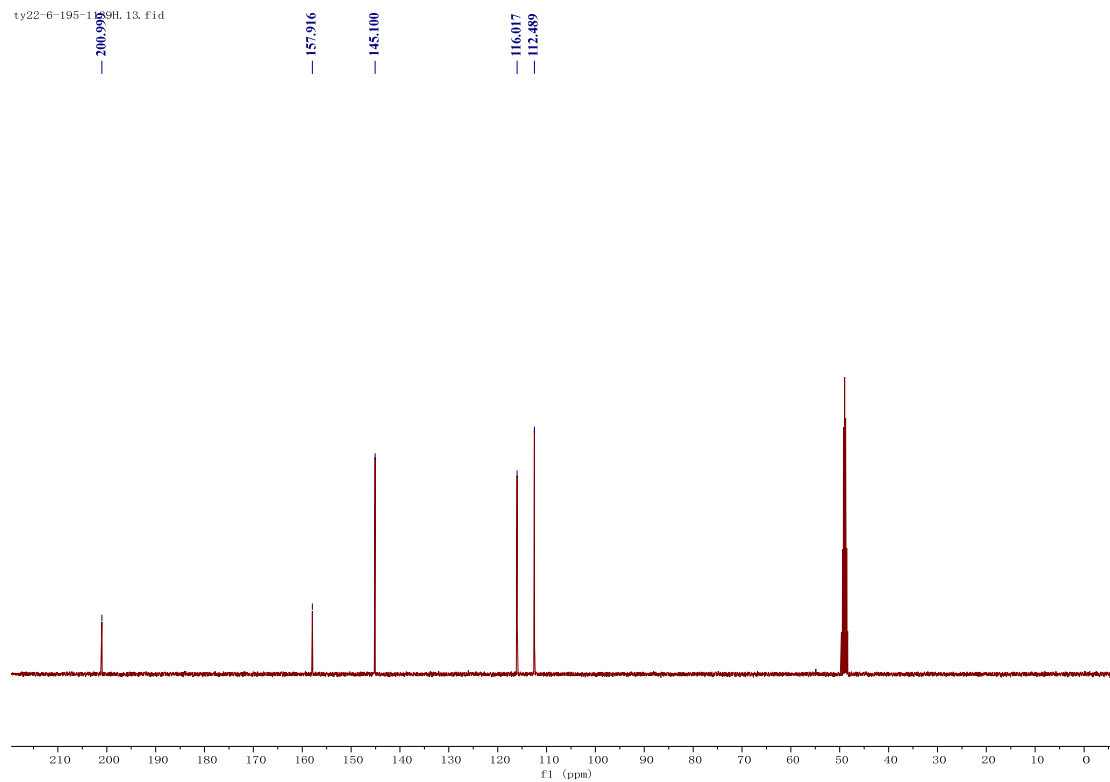

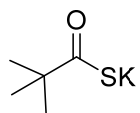

S18

S18. 1. F1d

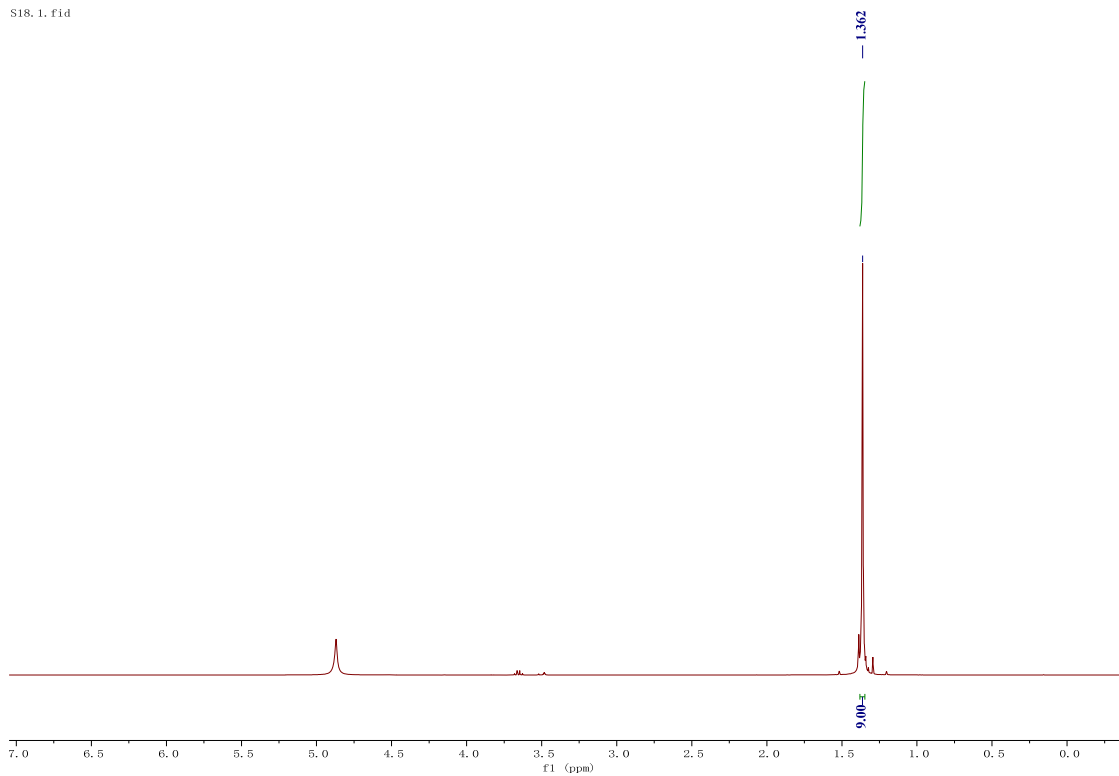

S18

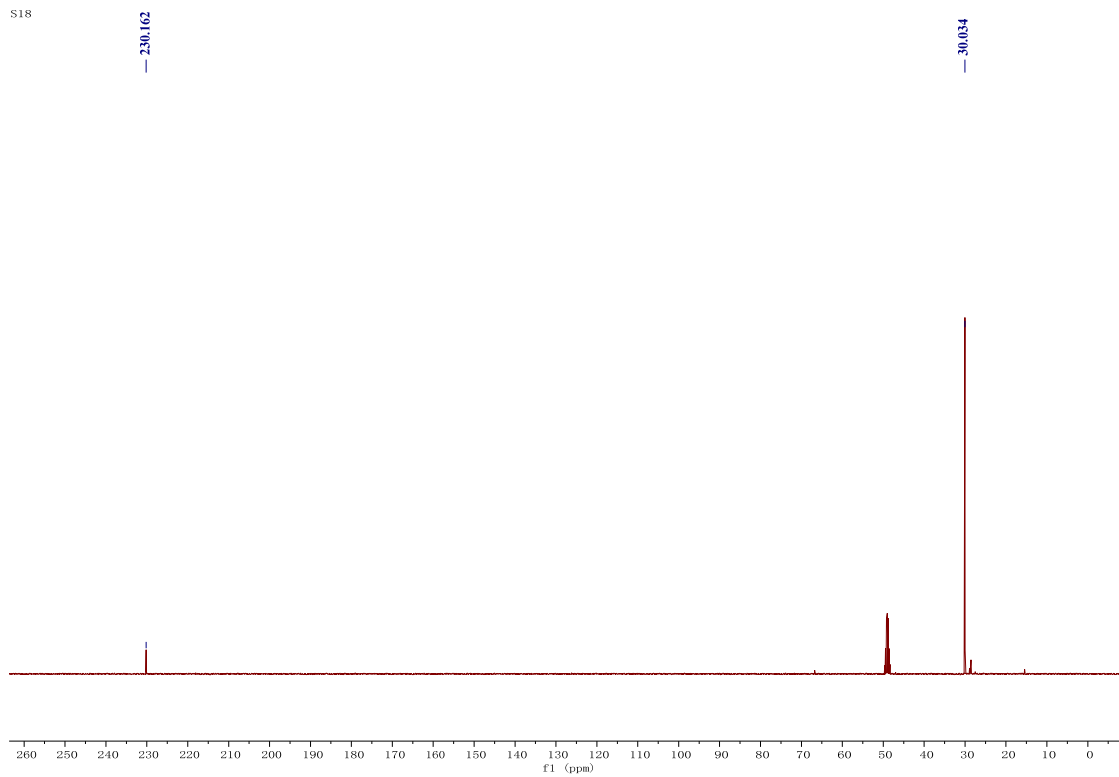

S153

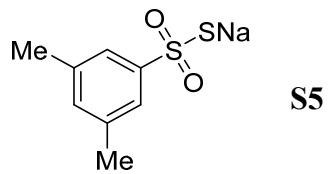

ty21-5-161-917-Pc. 1. fid

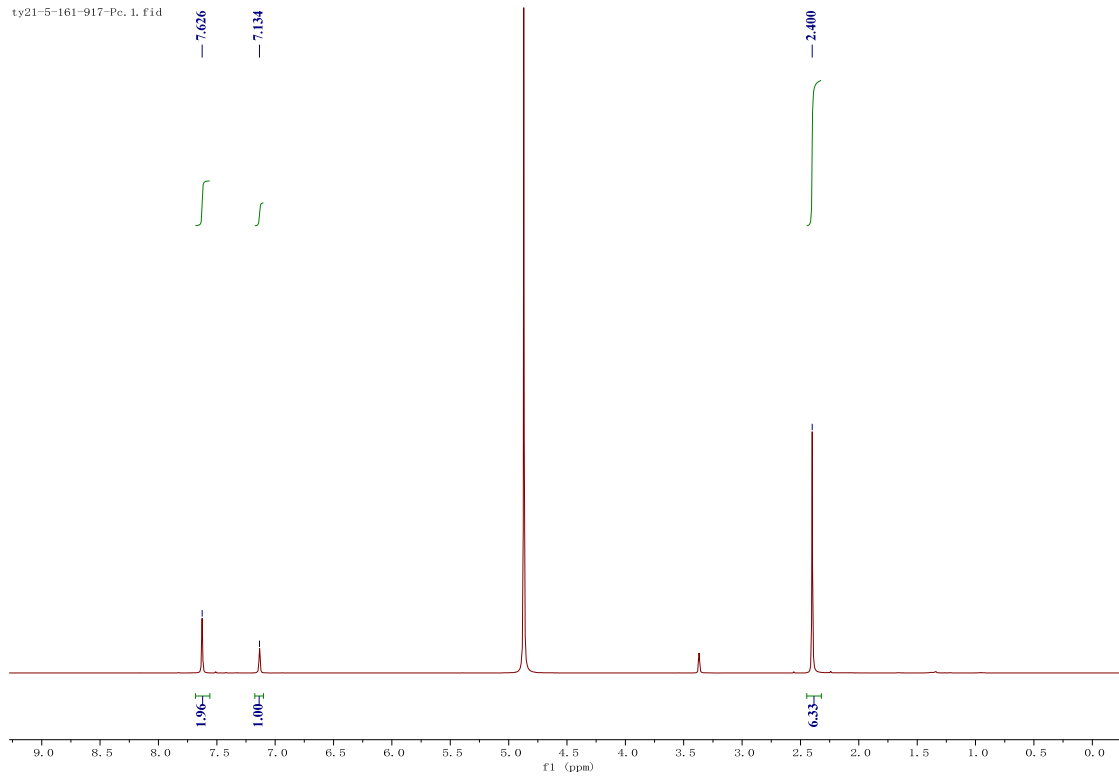

ty21-5-161-917-Pc. 13. f13

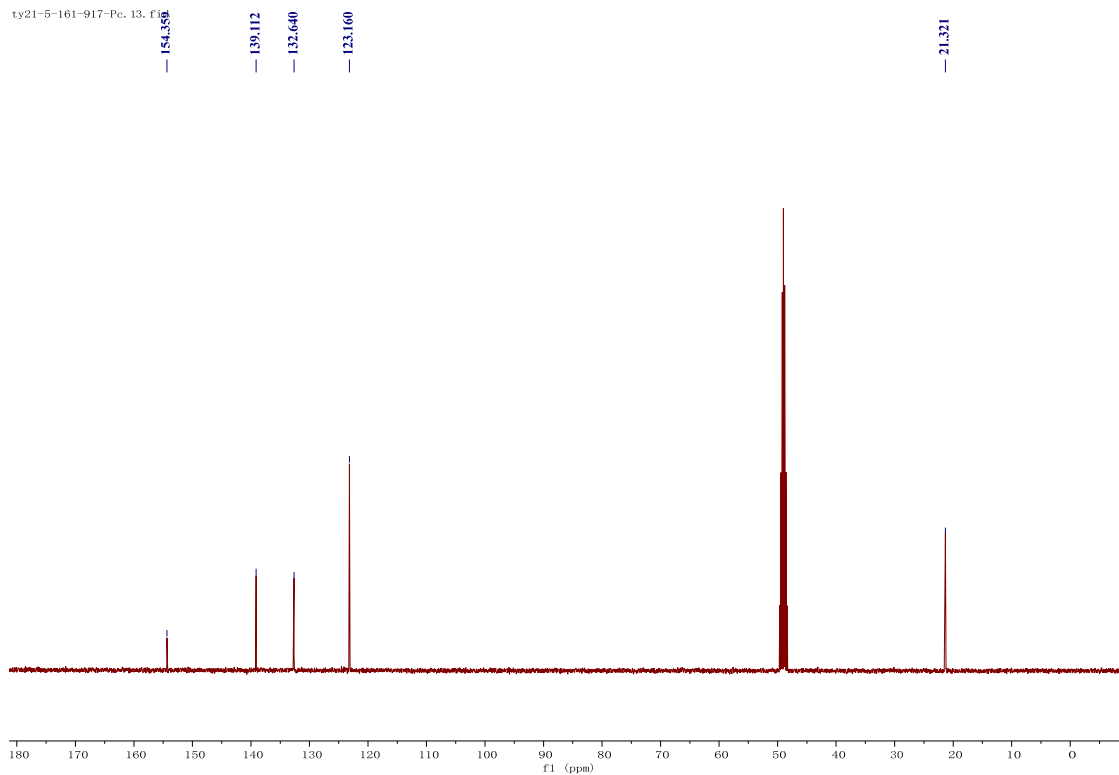

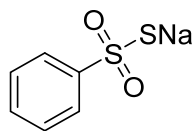

S6

ty22-6-76-1020-4P.1.fid

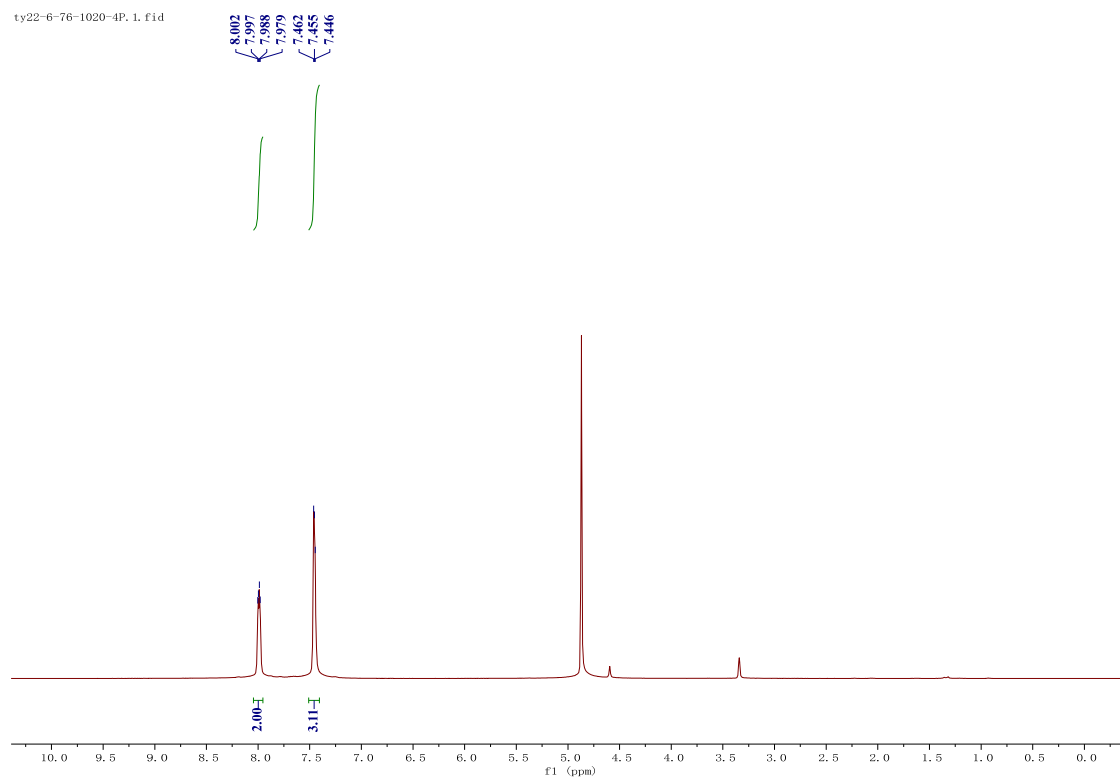

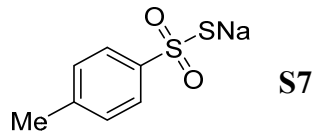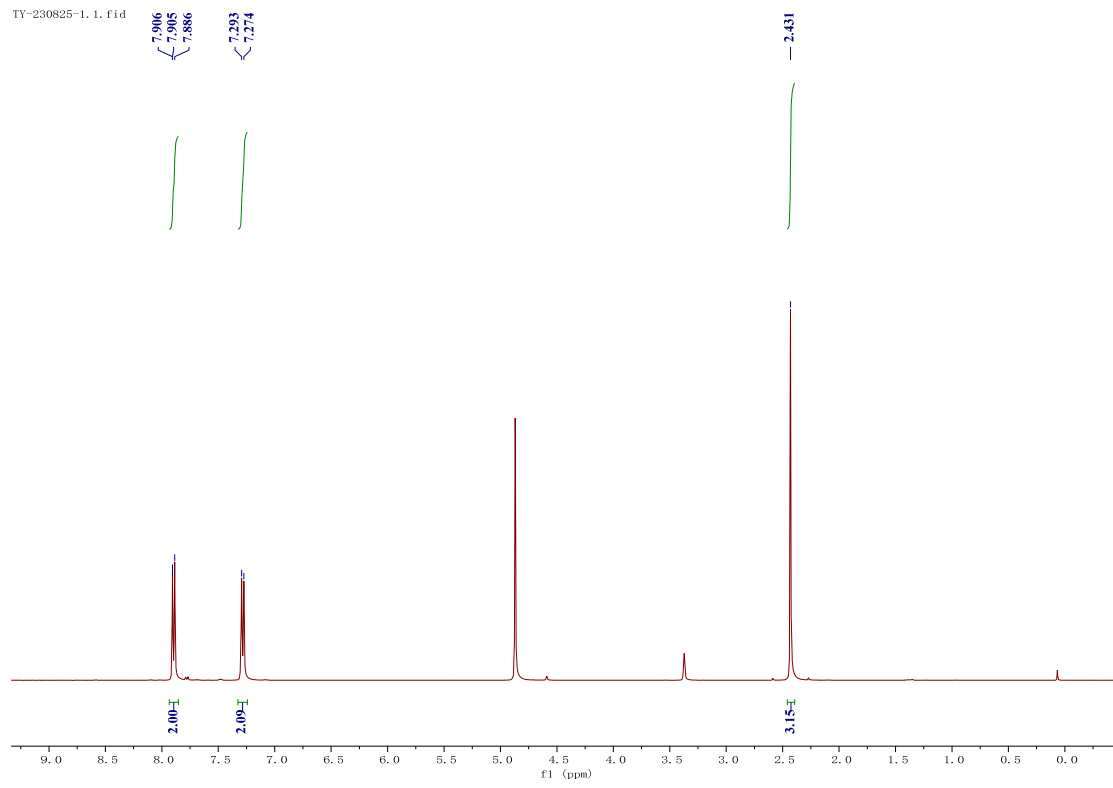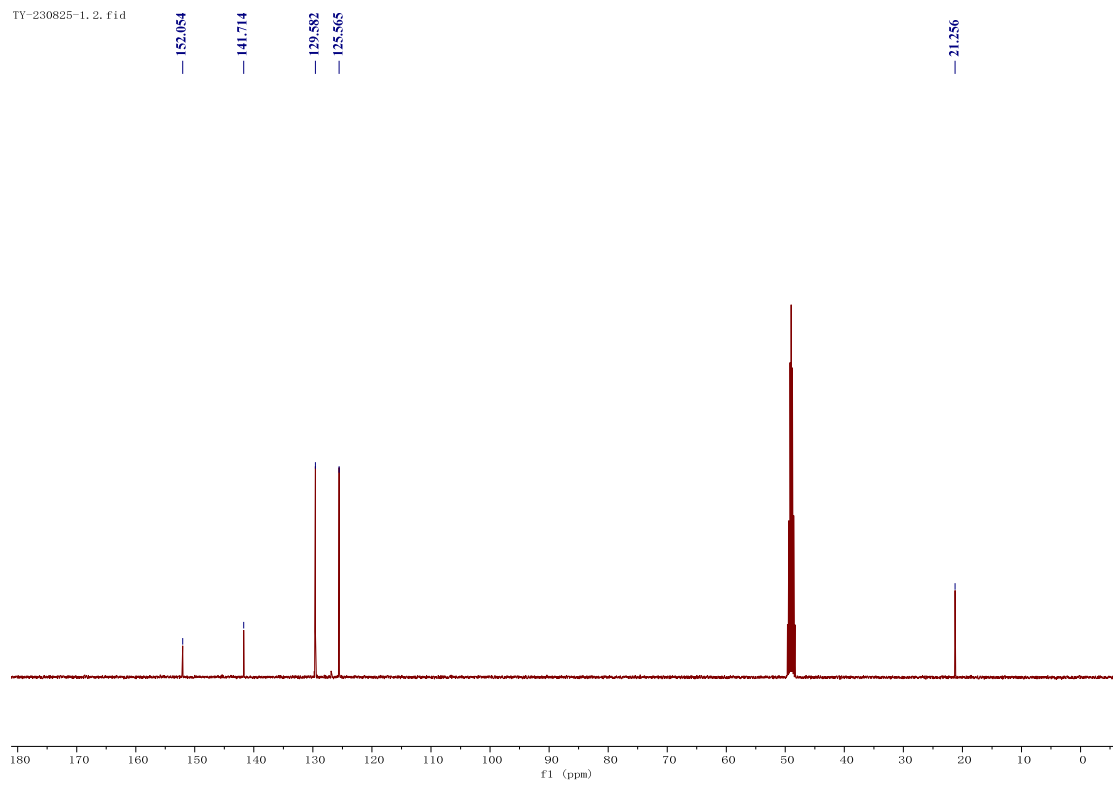

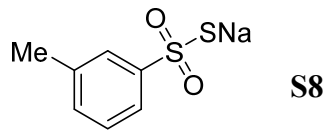

ty22-S8.1.fid

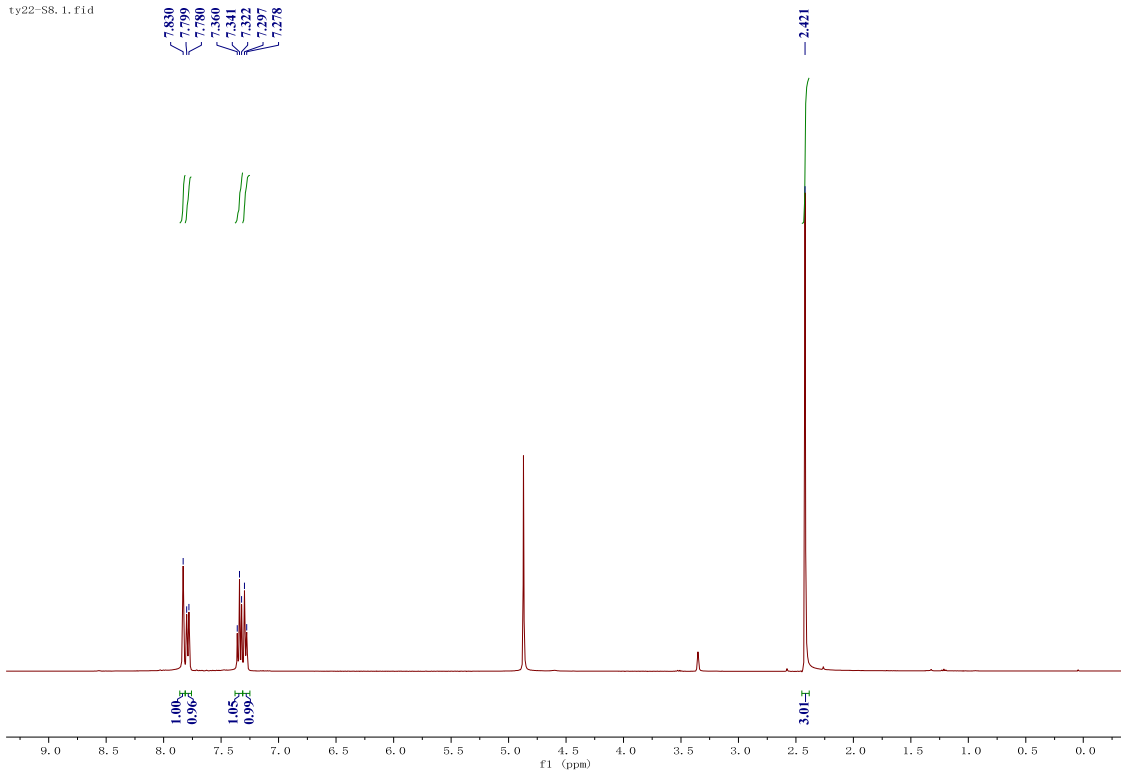

ty22-S8.13.fid

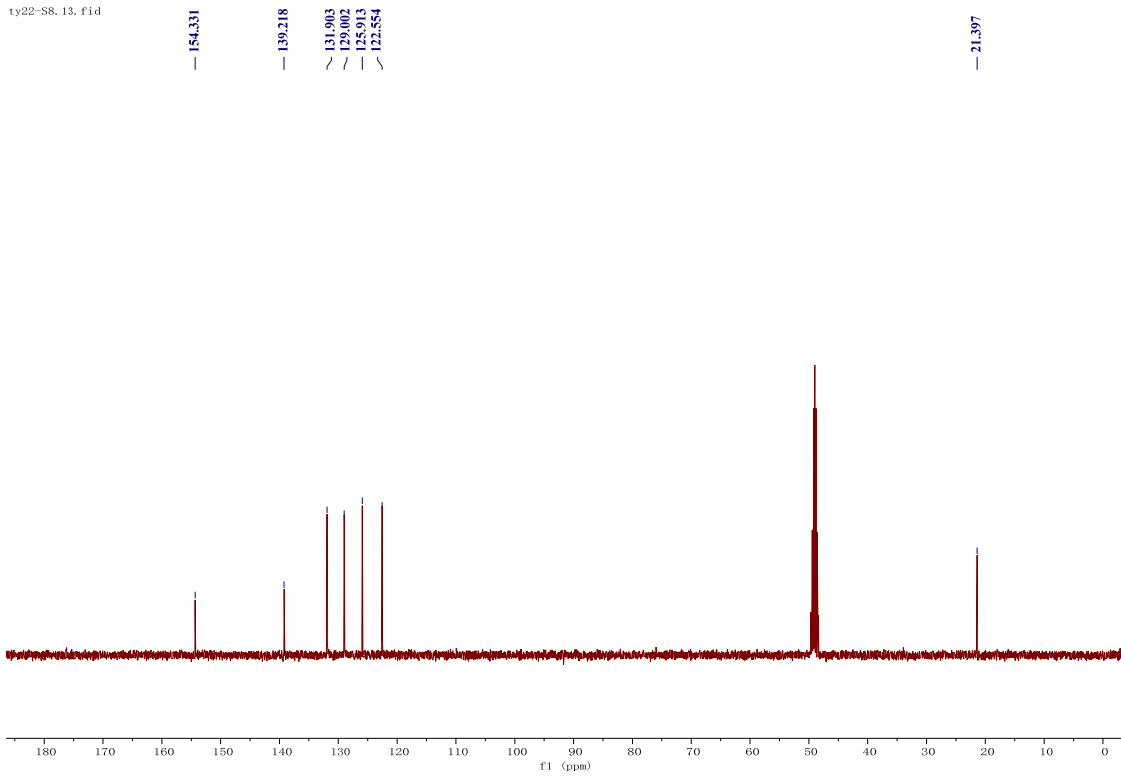

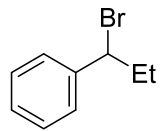

E1

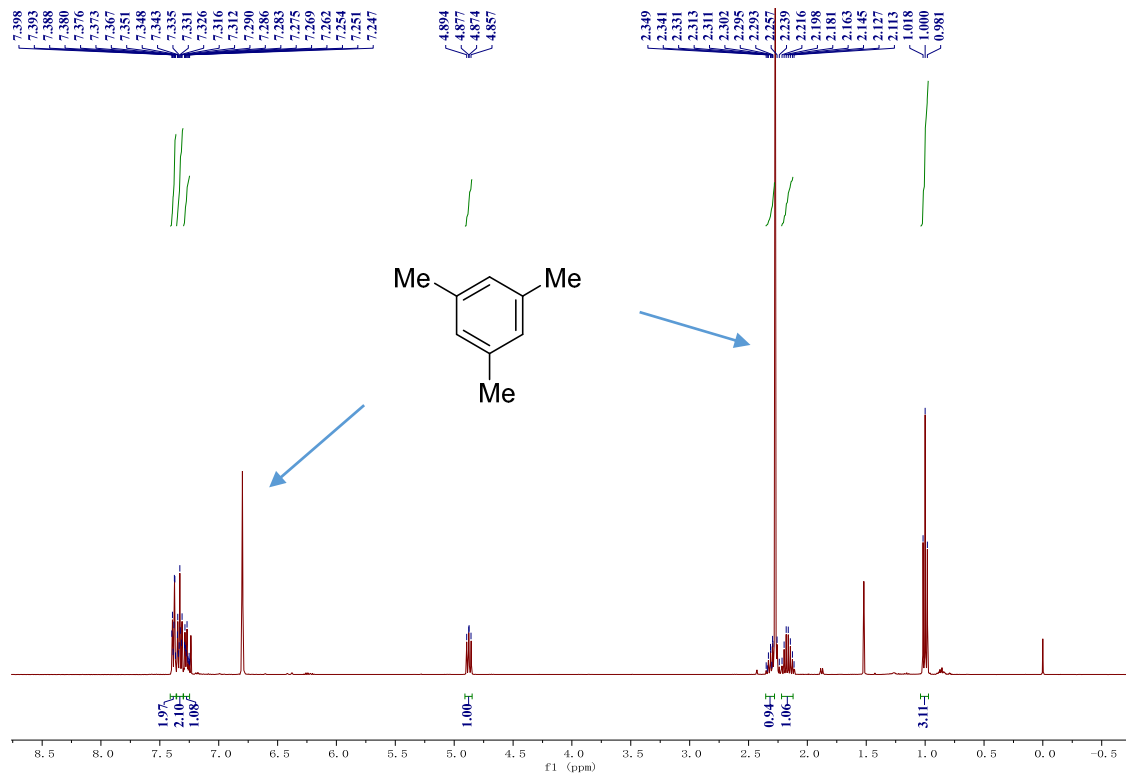

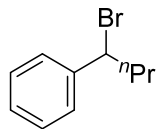

**E3**

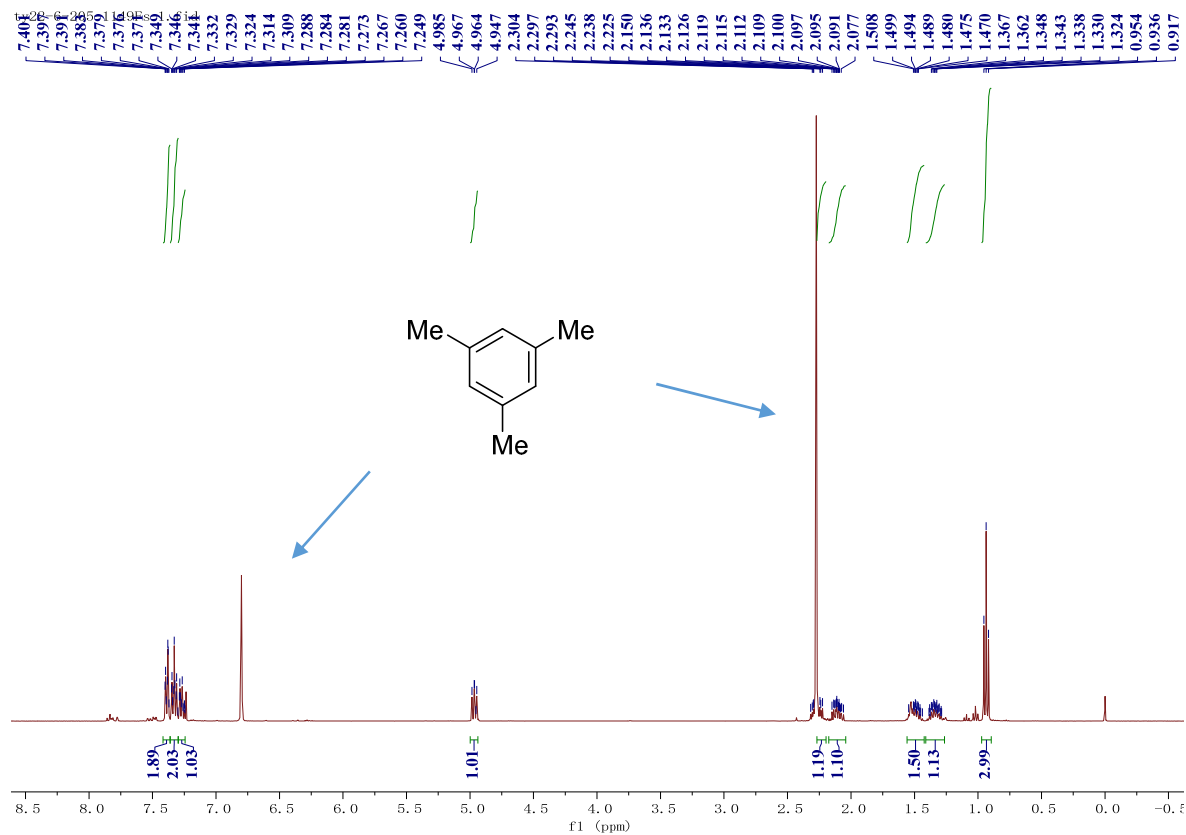



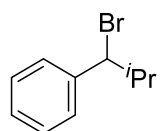

**E4**

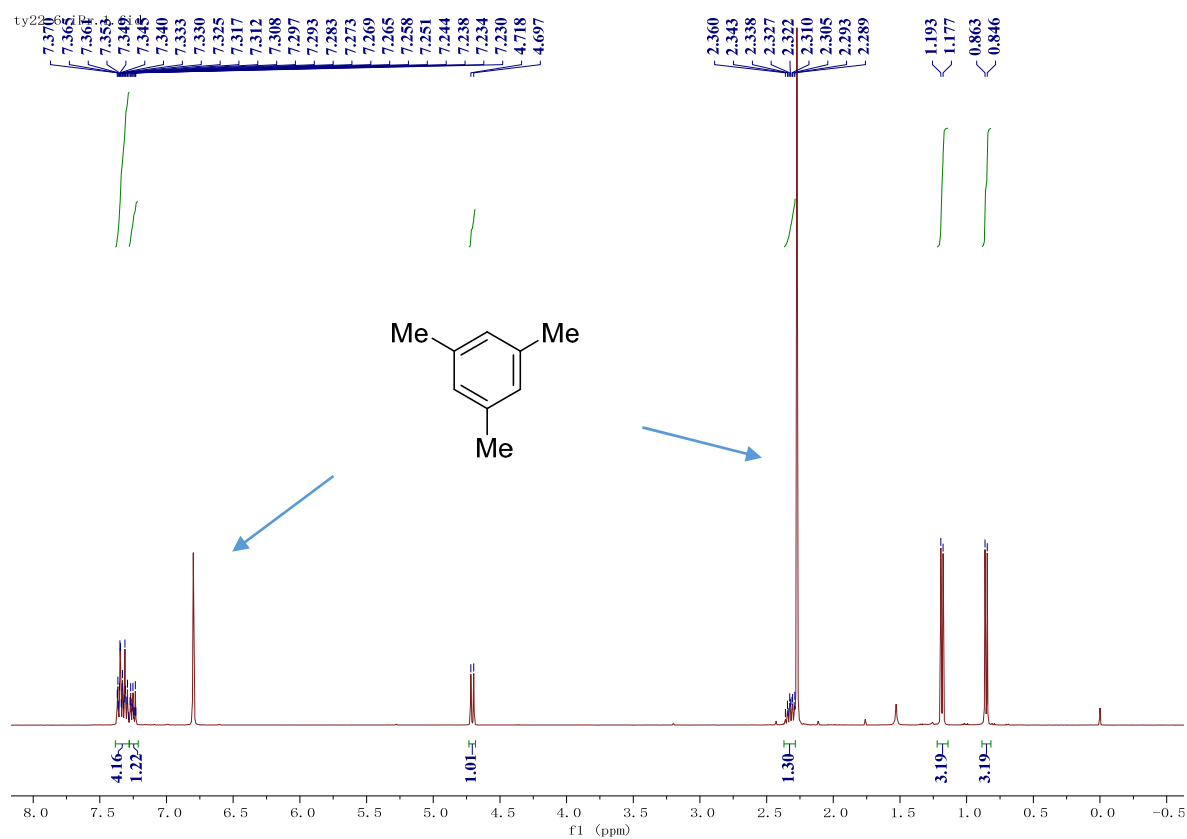

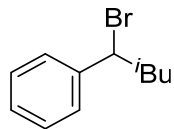

**E5**

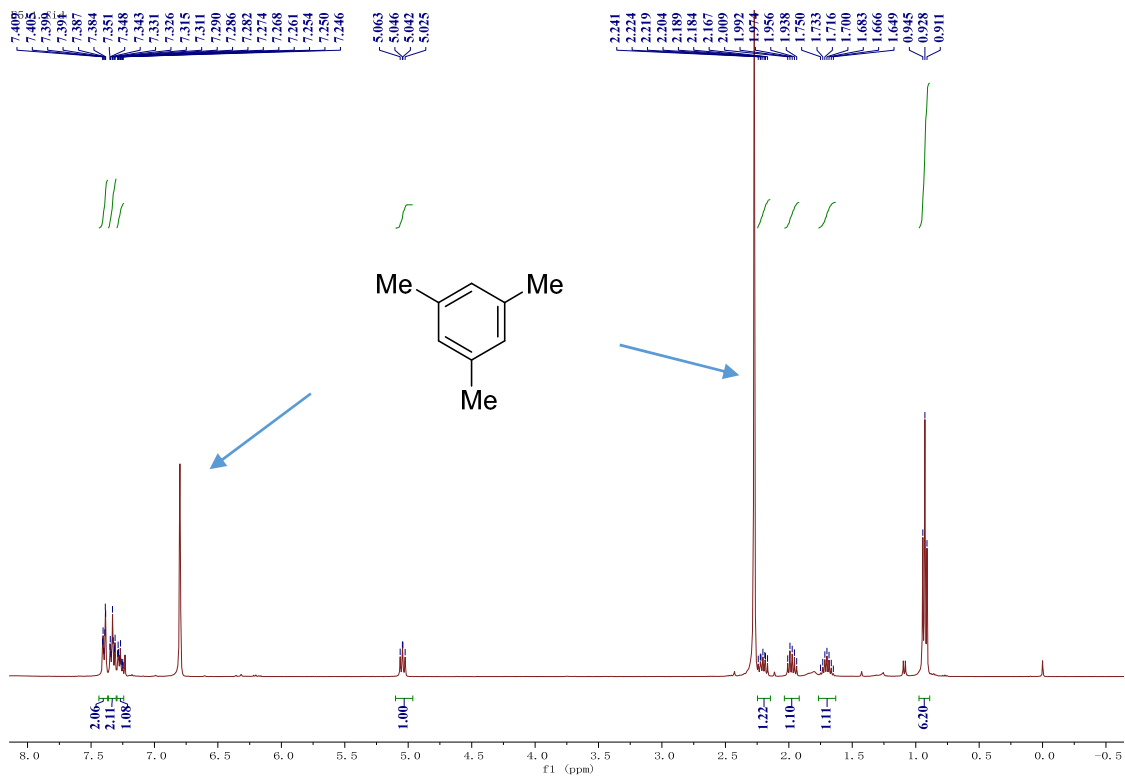

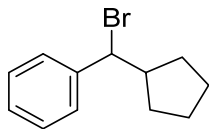

**E6**

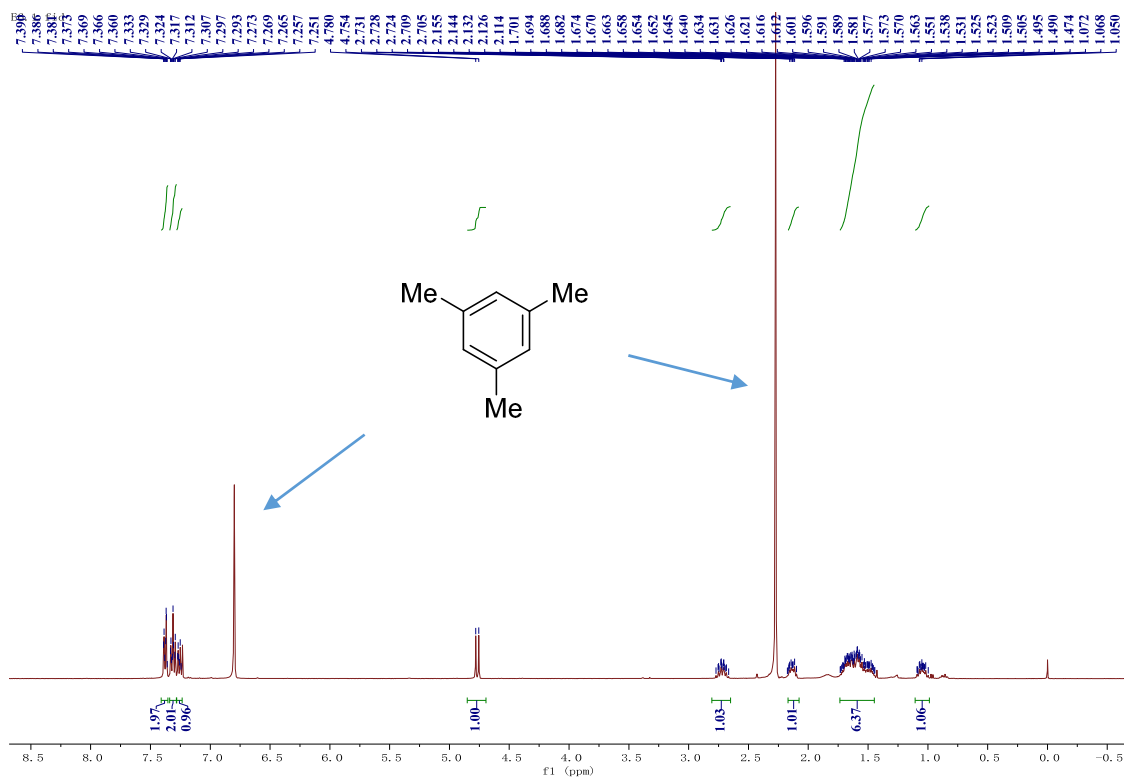

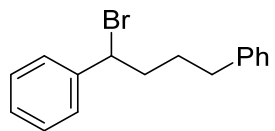

**E7**

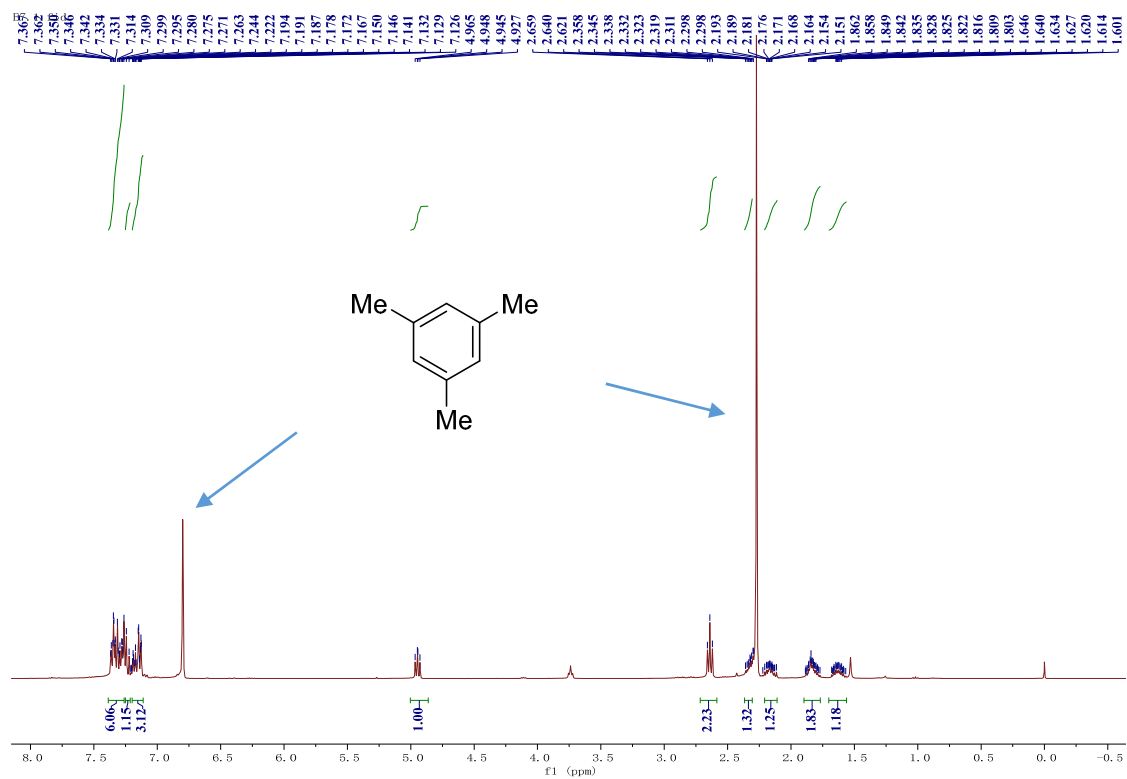

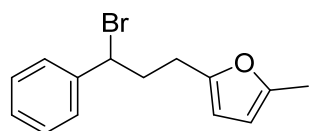

**E8**

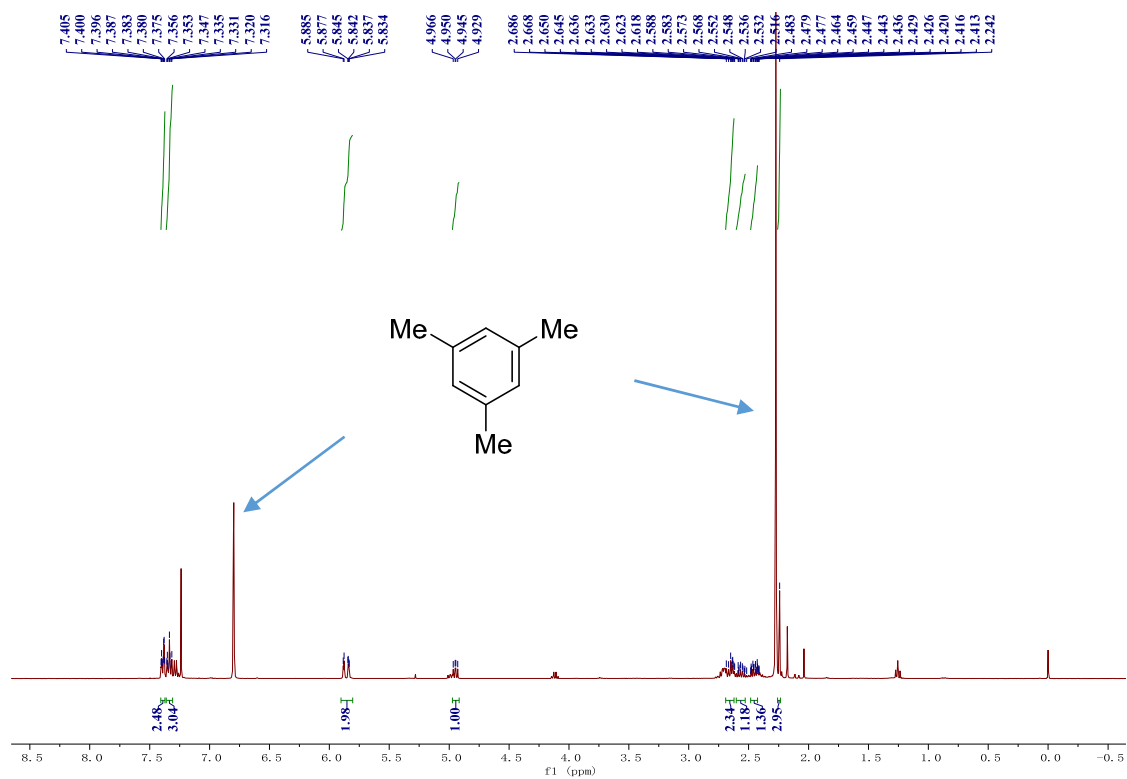

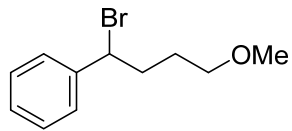

**E9**

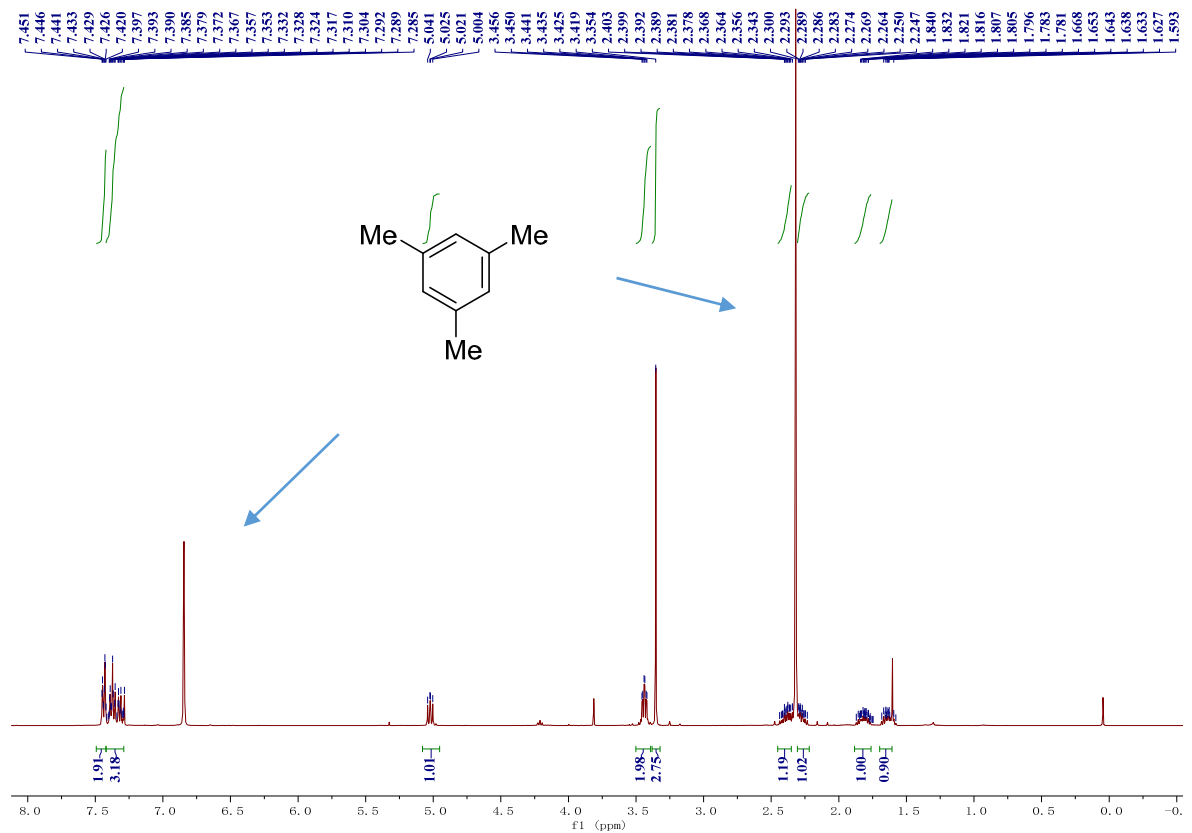

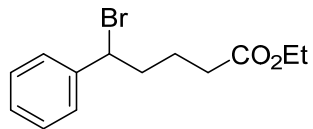

**E10**

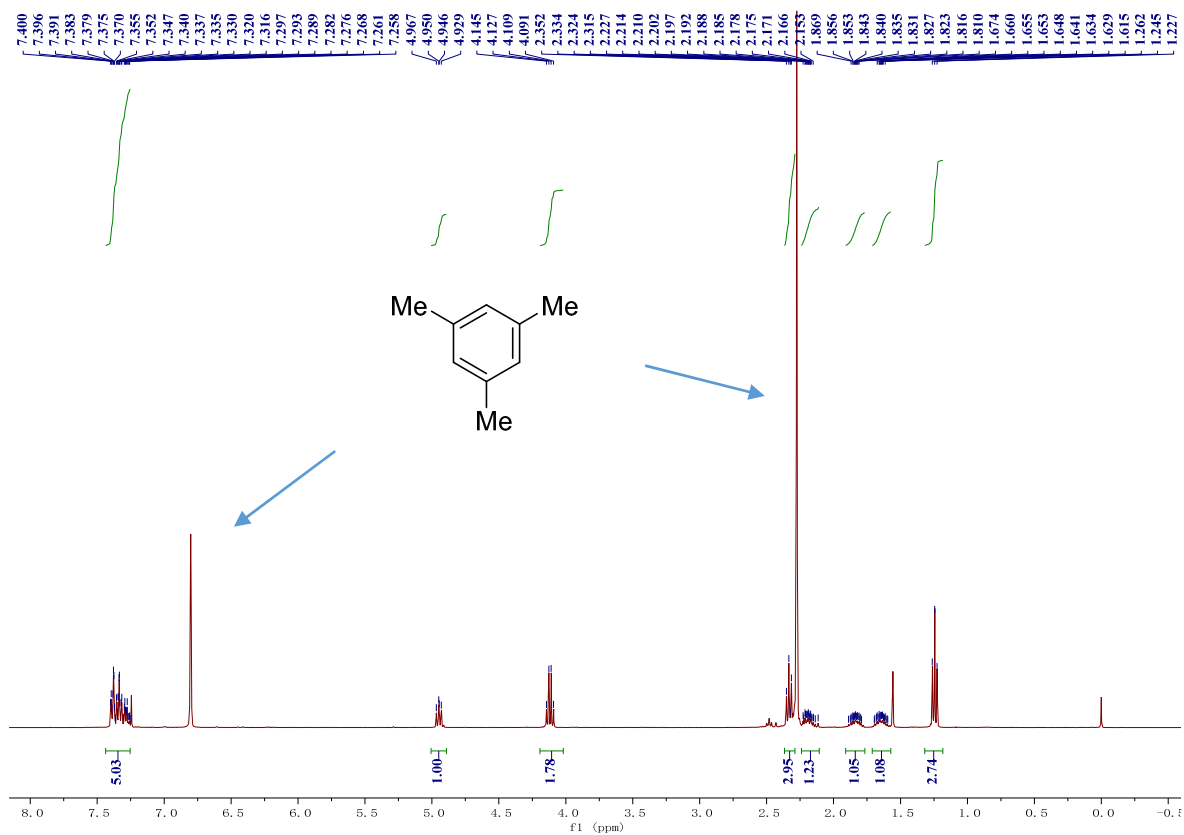

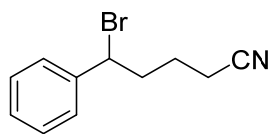

**E11**

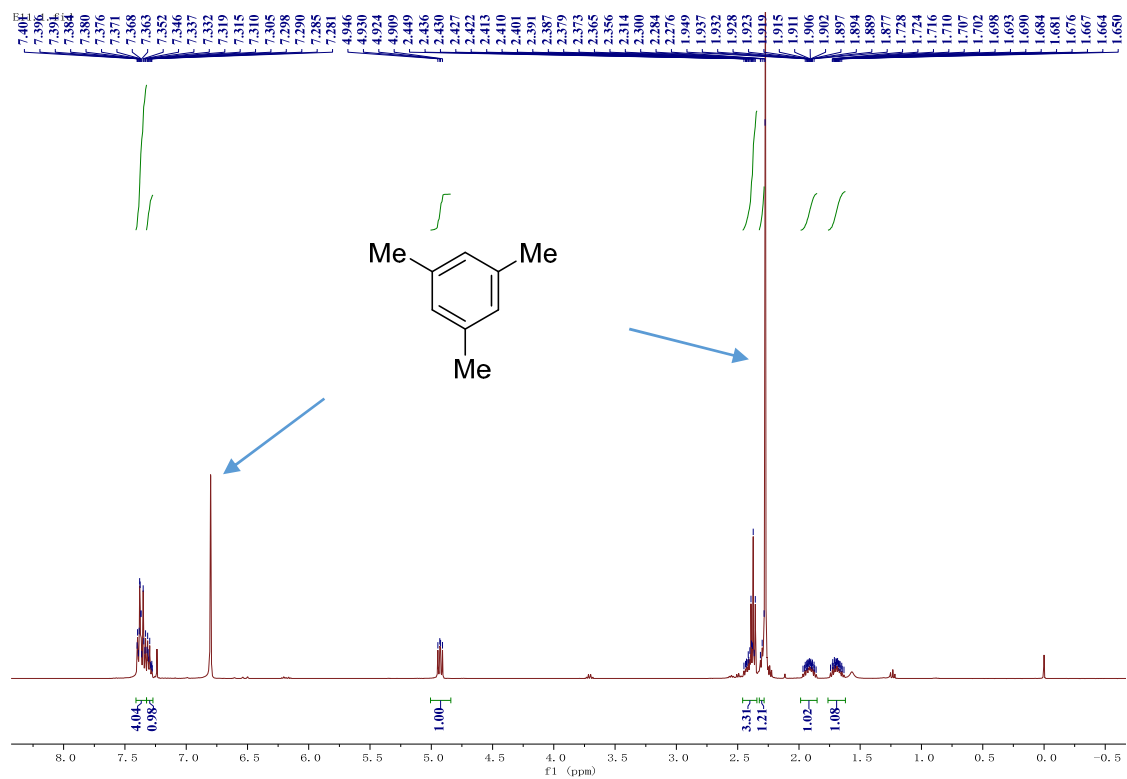



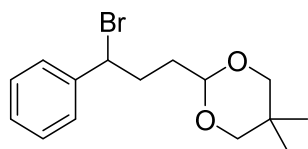

**E12**

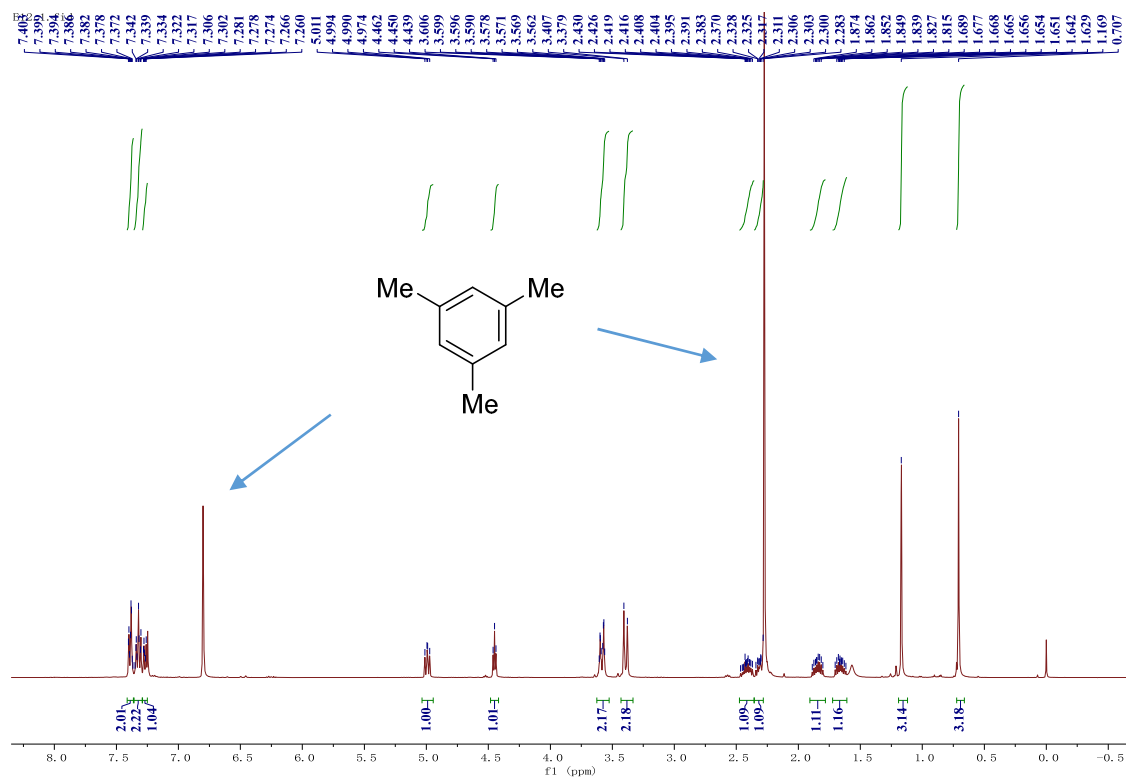

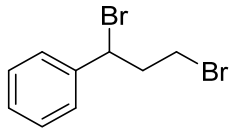

E13

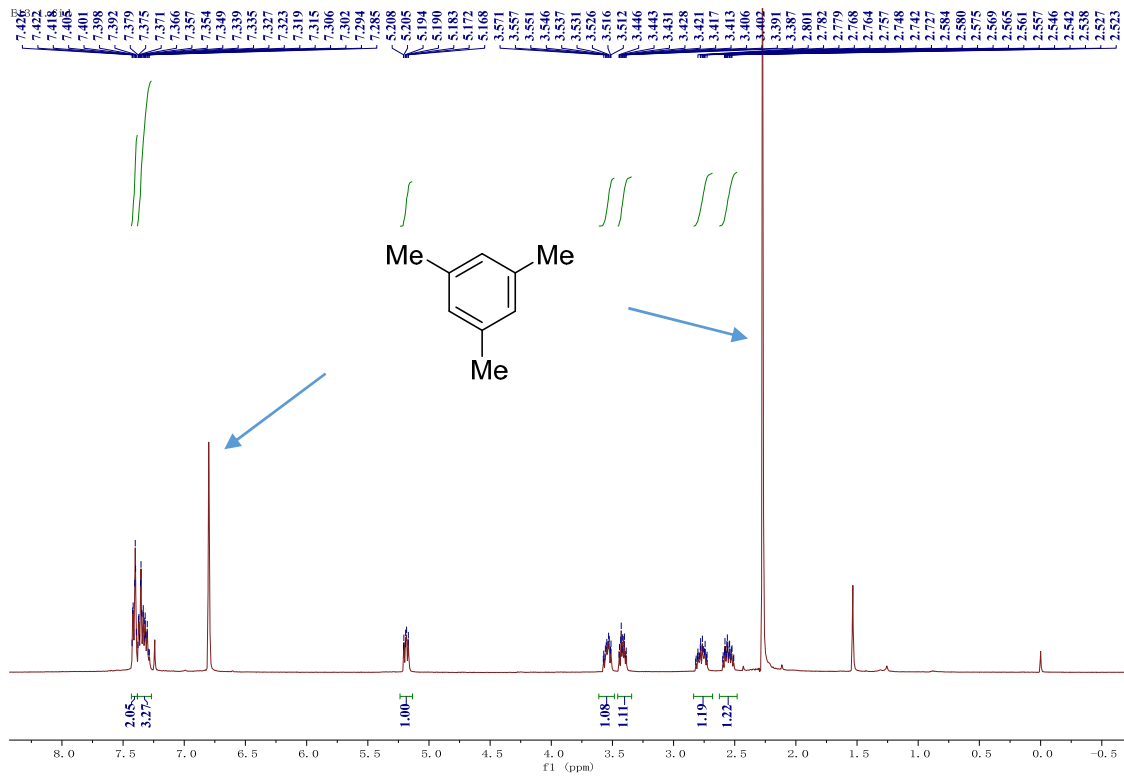

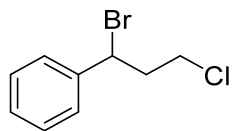

**E14**

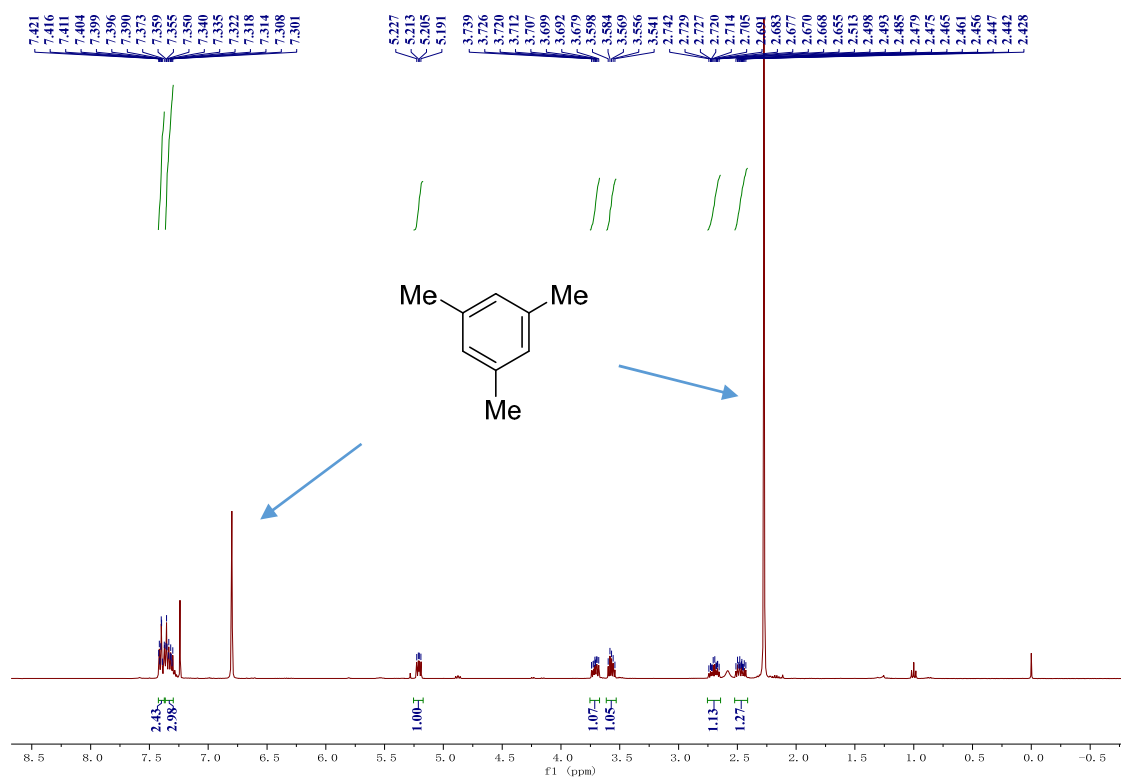

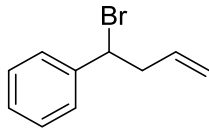

E15

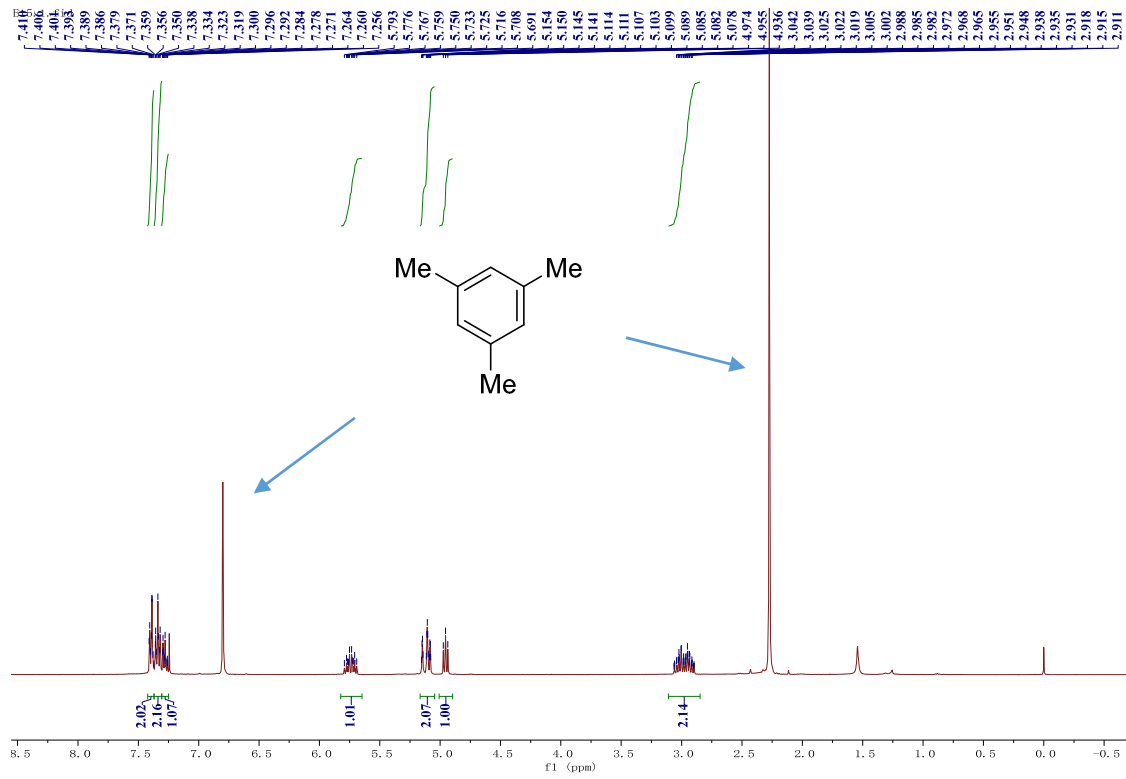

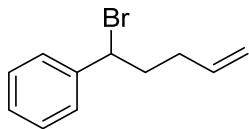

**E16**

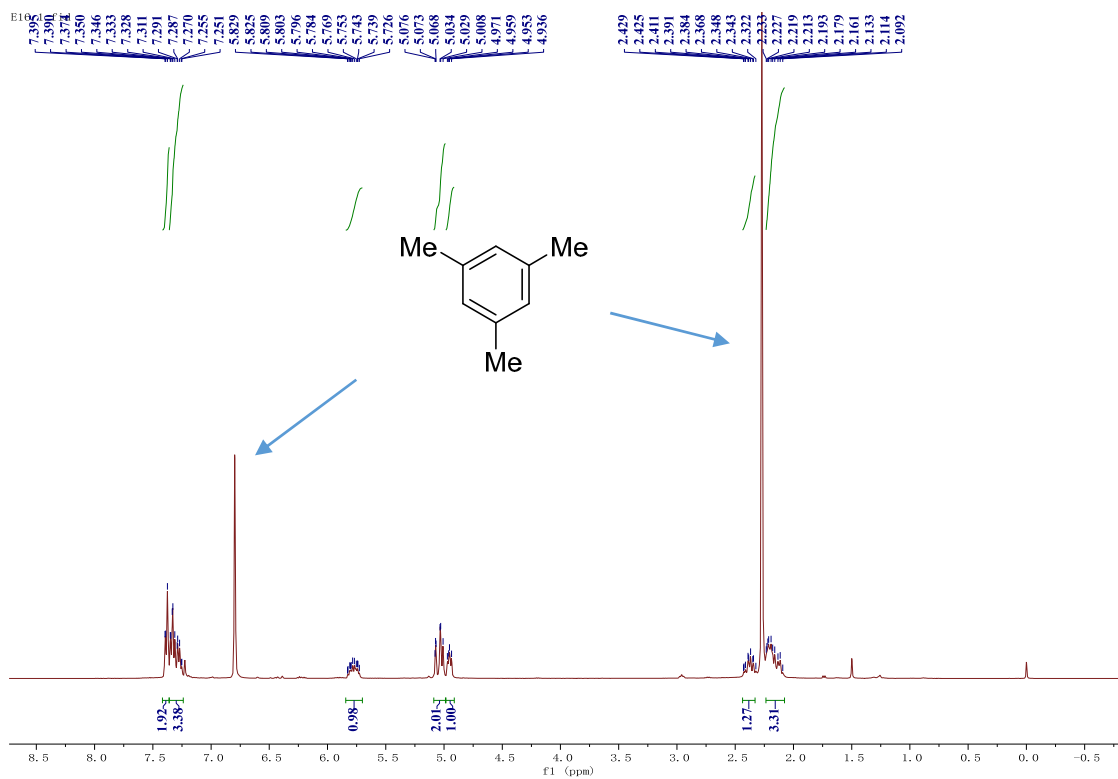

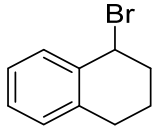

**E17**

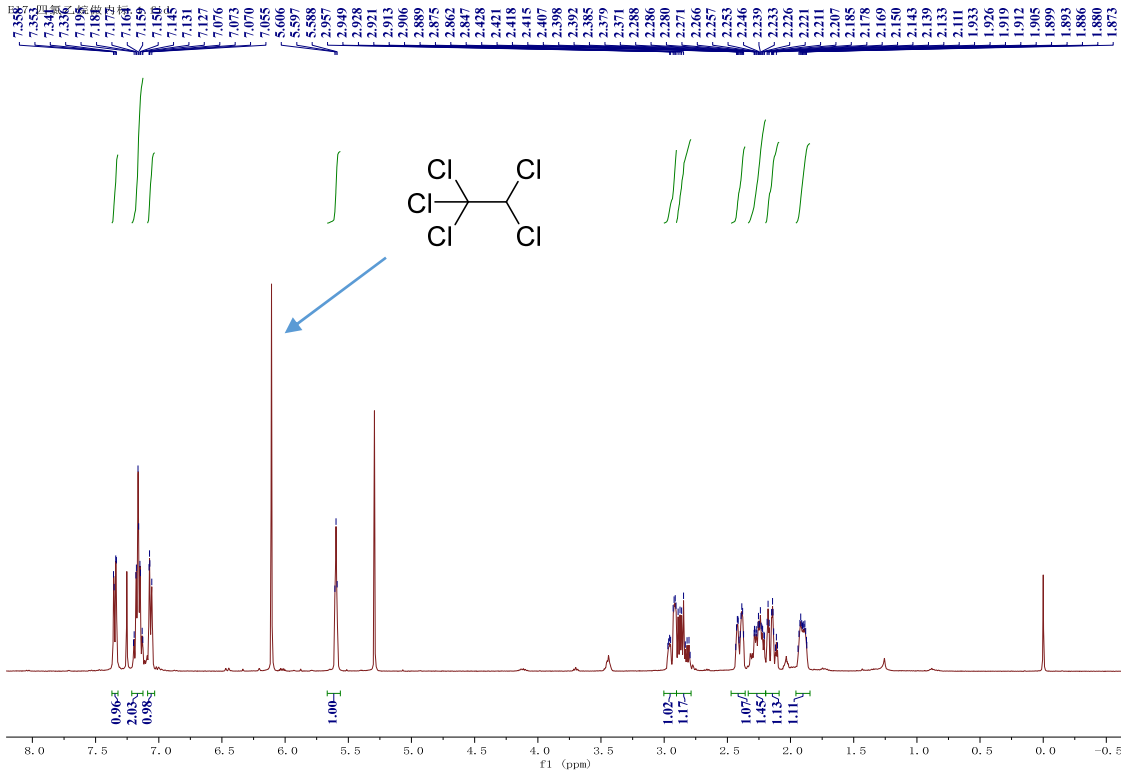

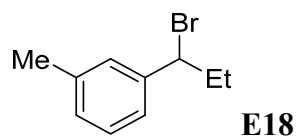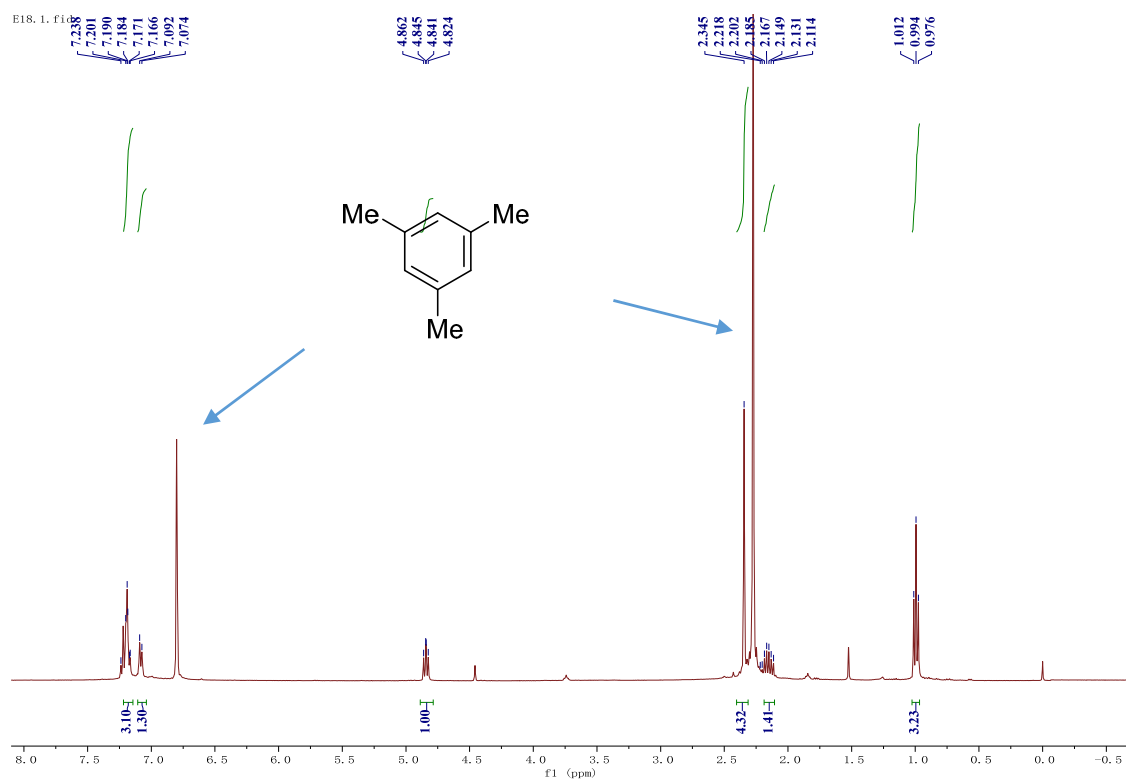

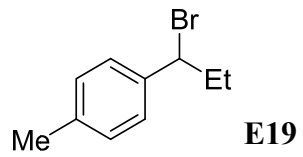

E19\_1.fid

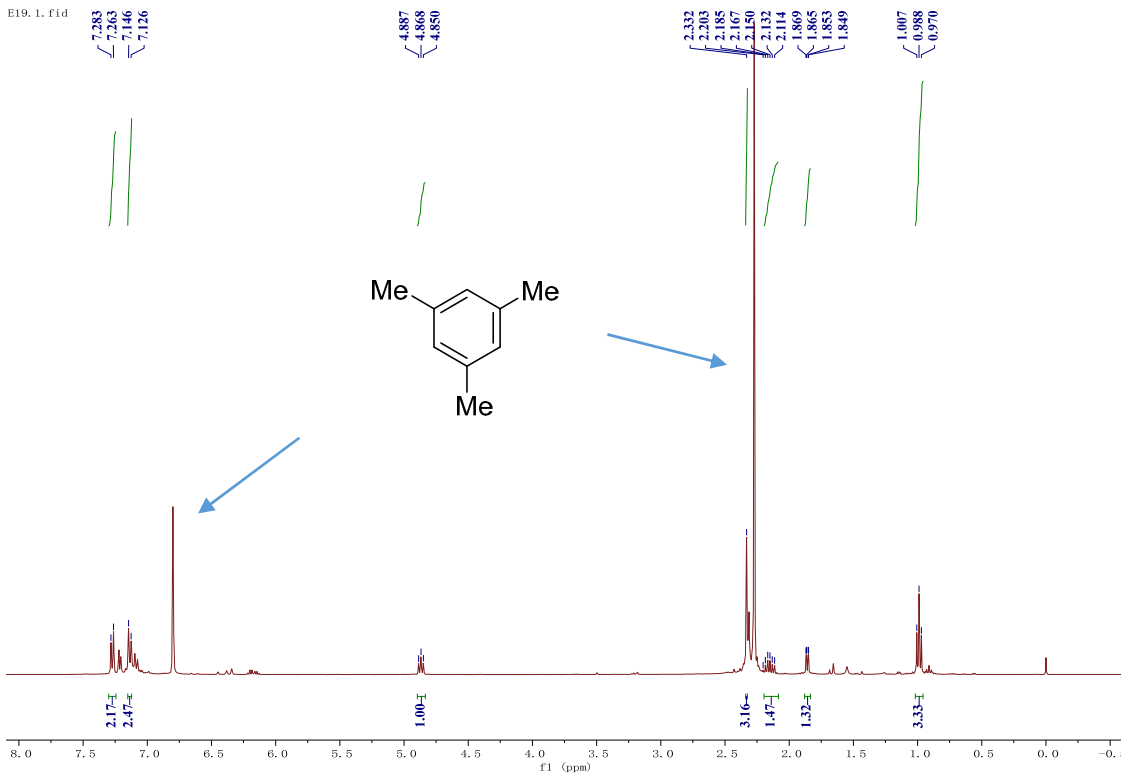



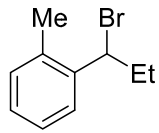

**E20**

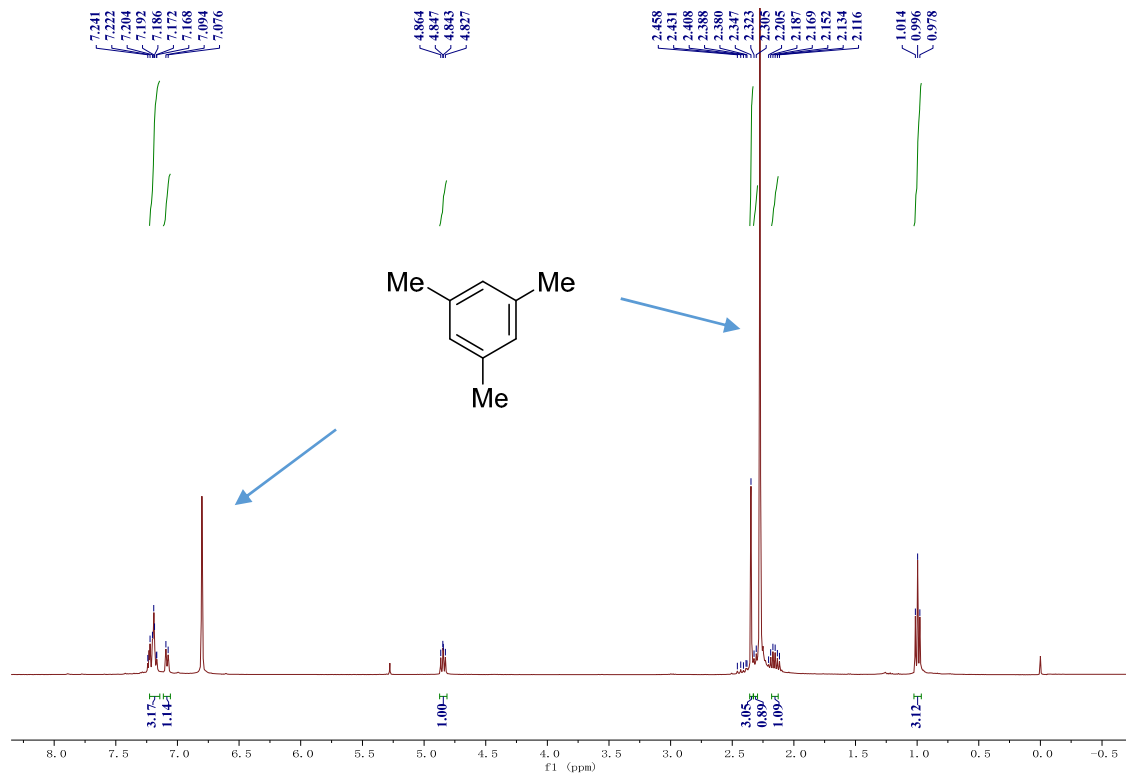

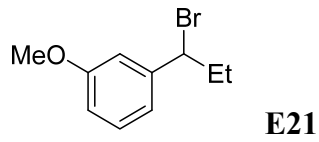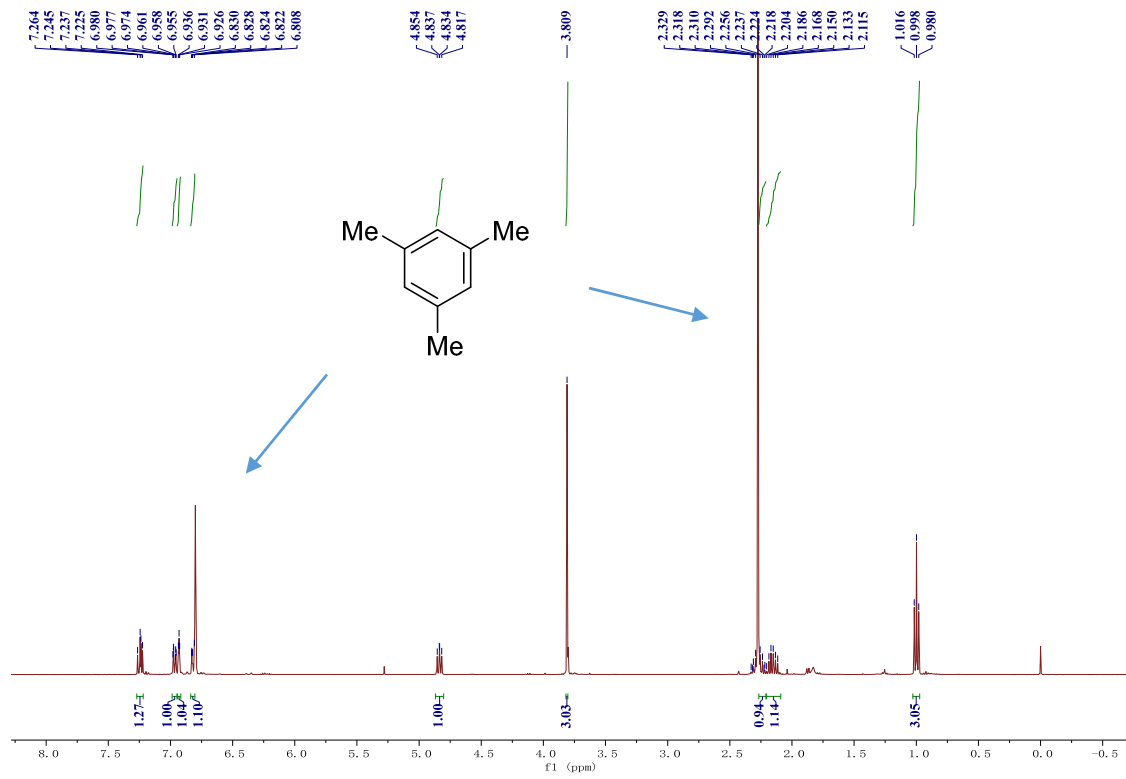

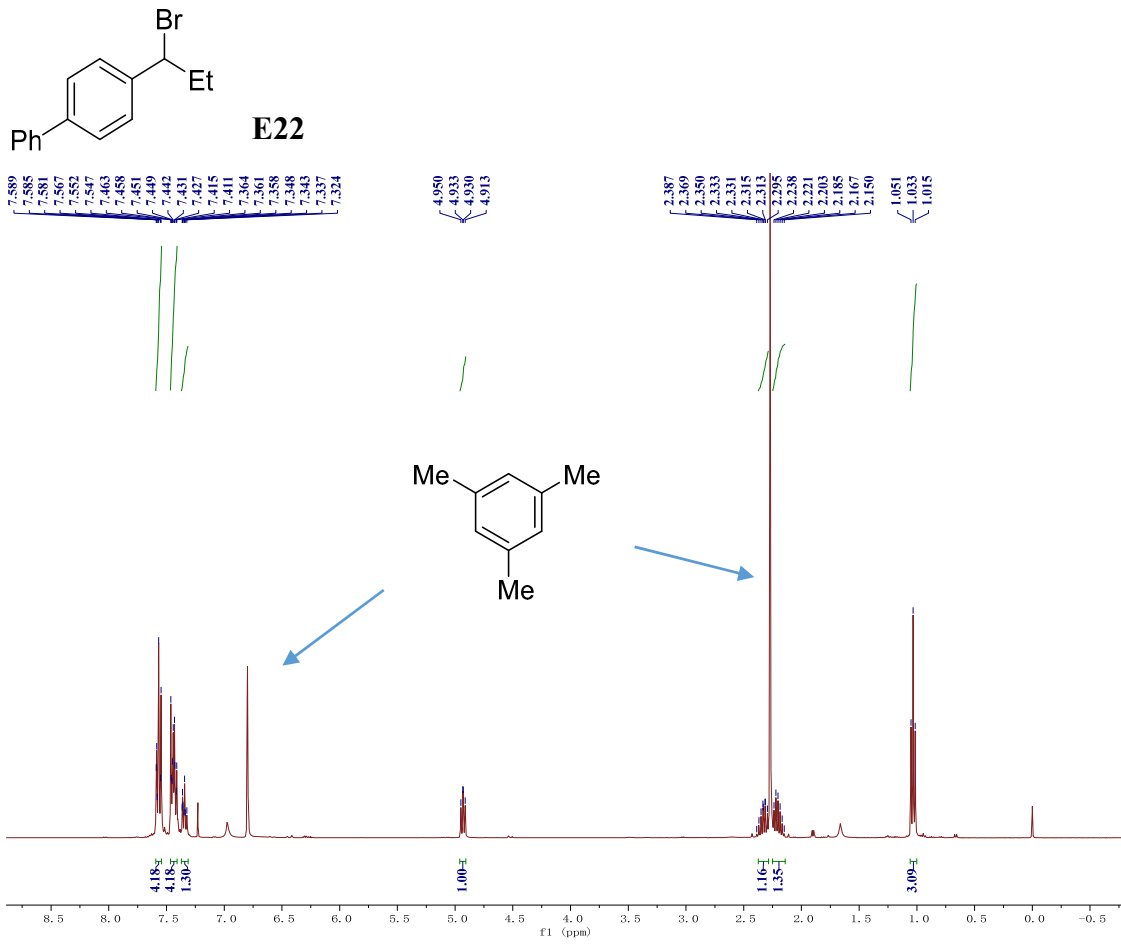

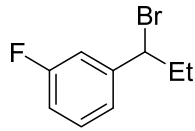

**E23**

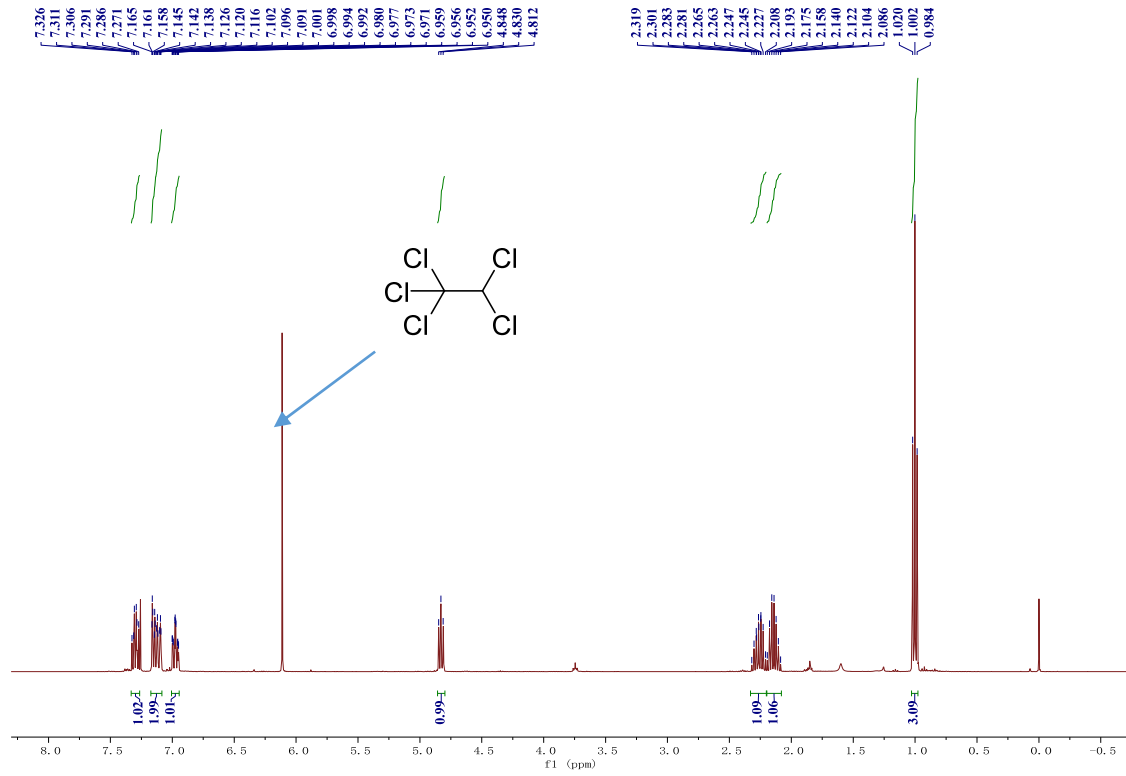

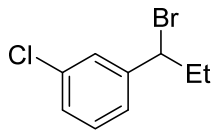

**E24**

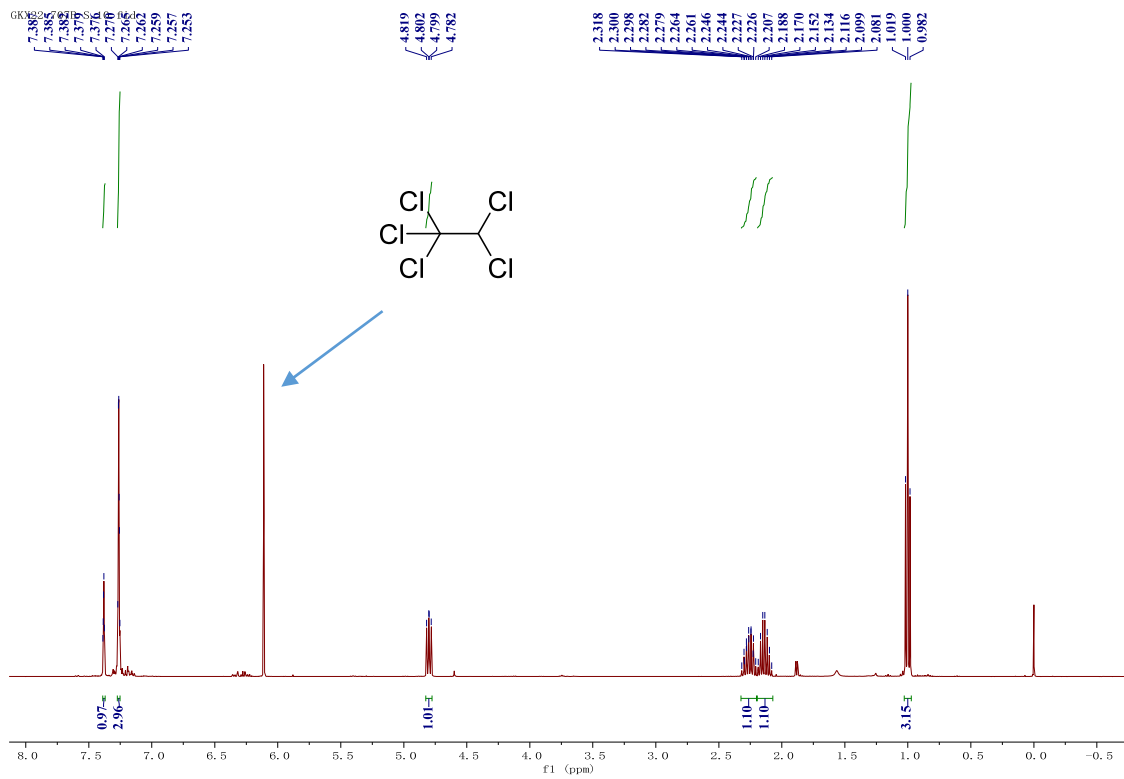

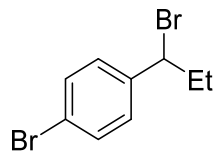

E25

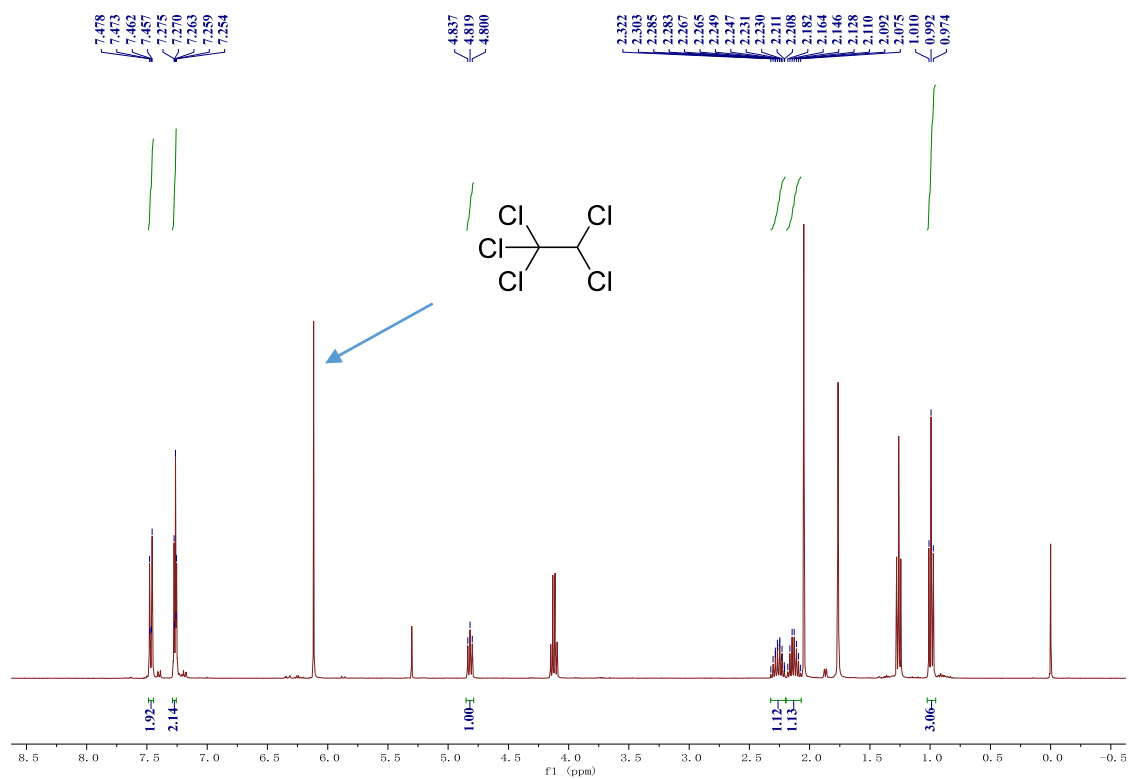

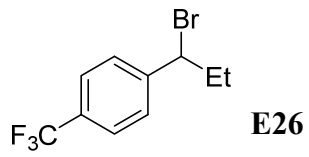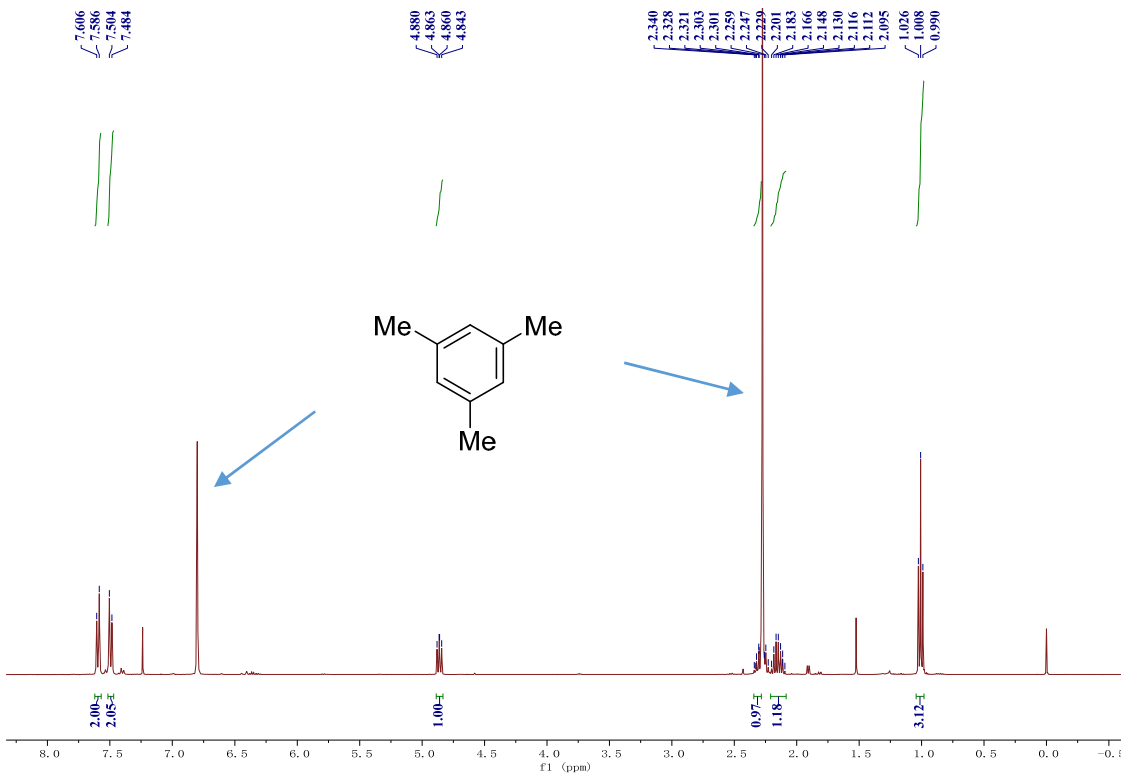

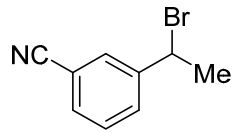

E27

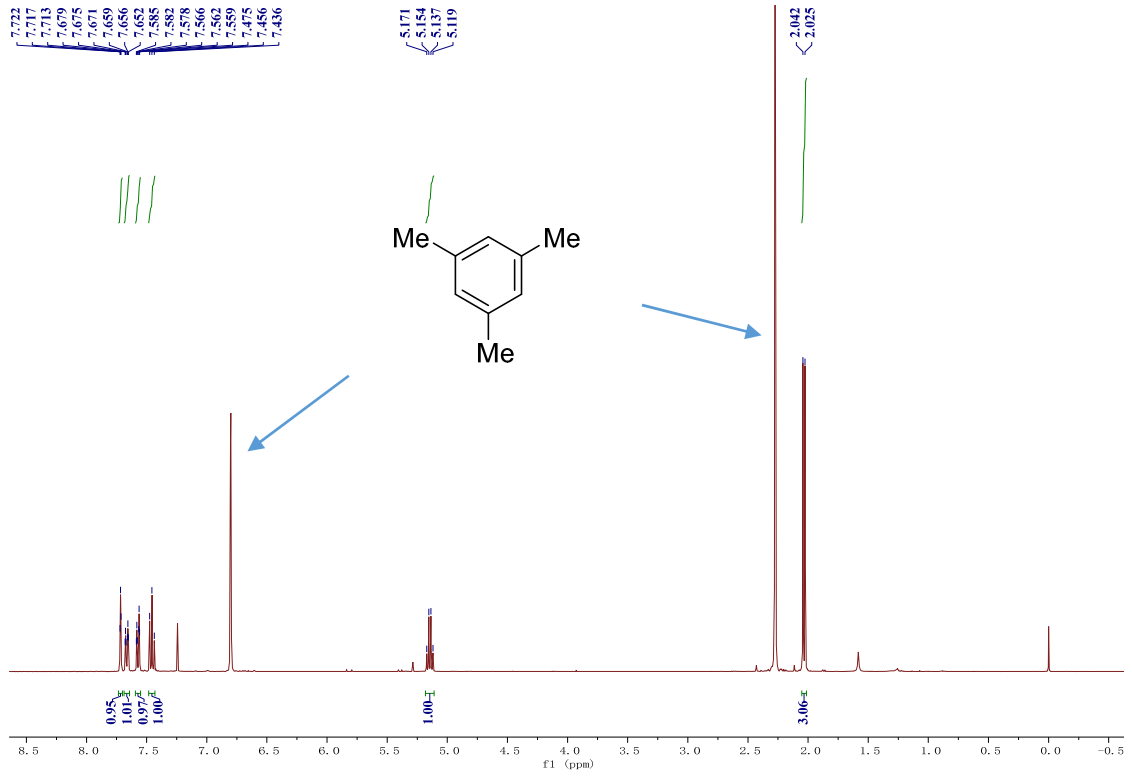



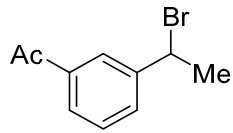

**E28**

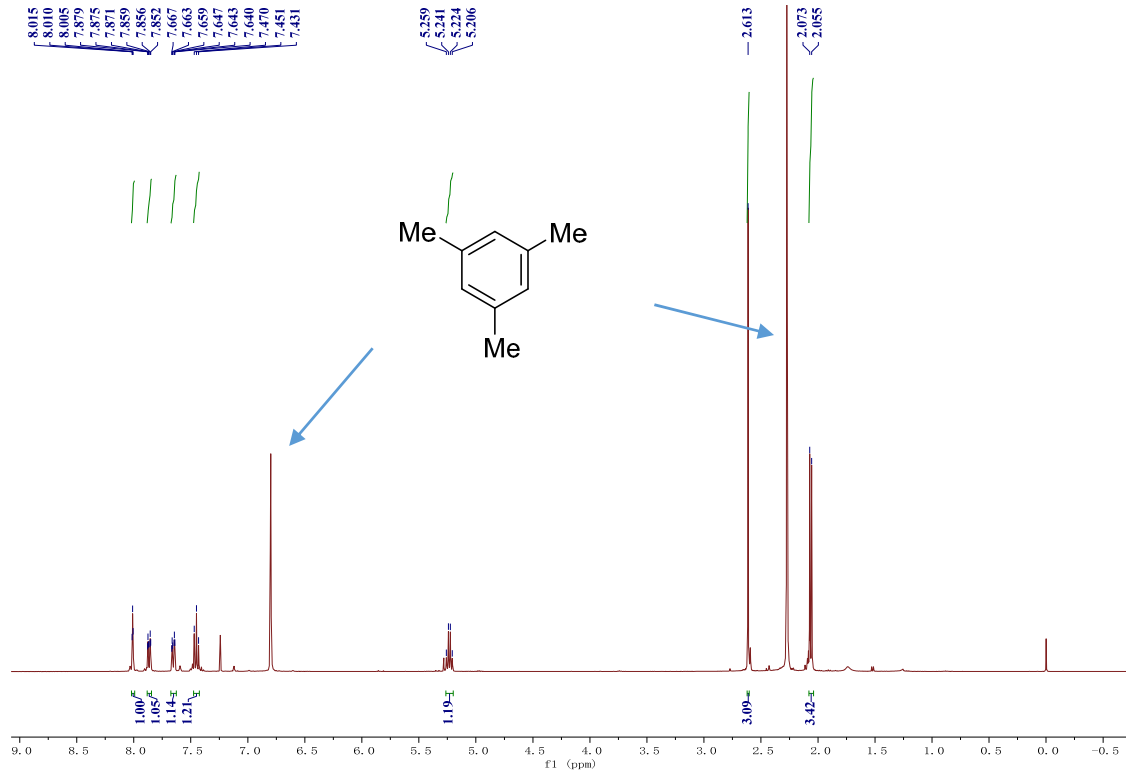

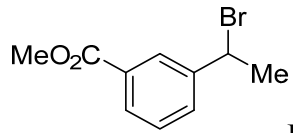

E29

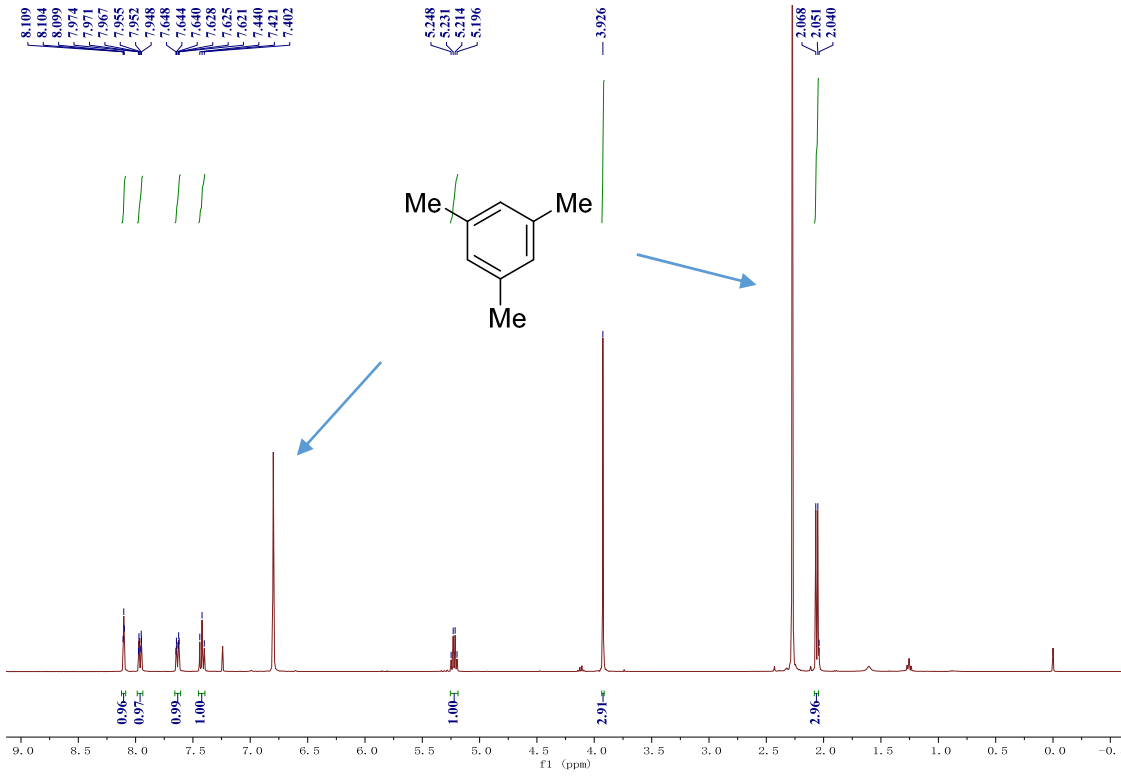

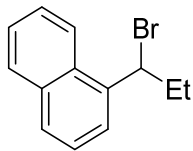

**E30**

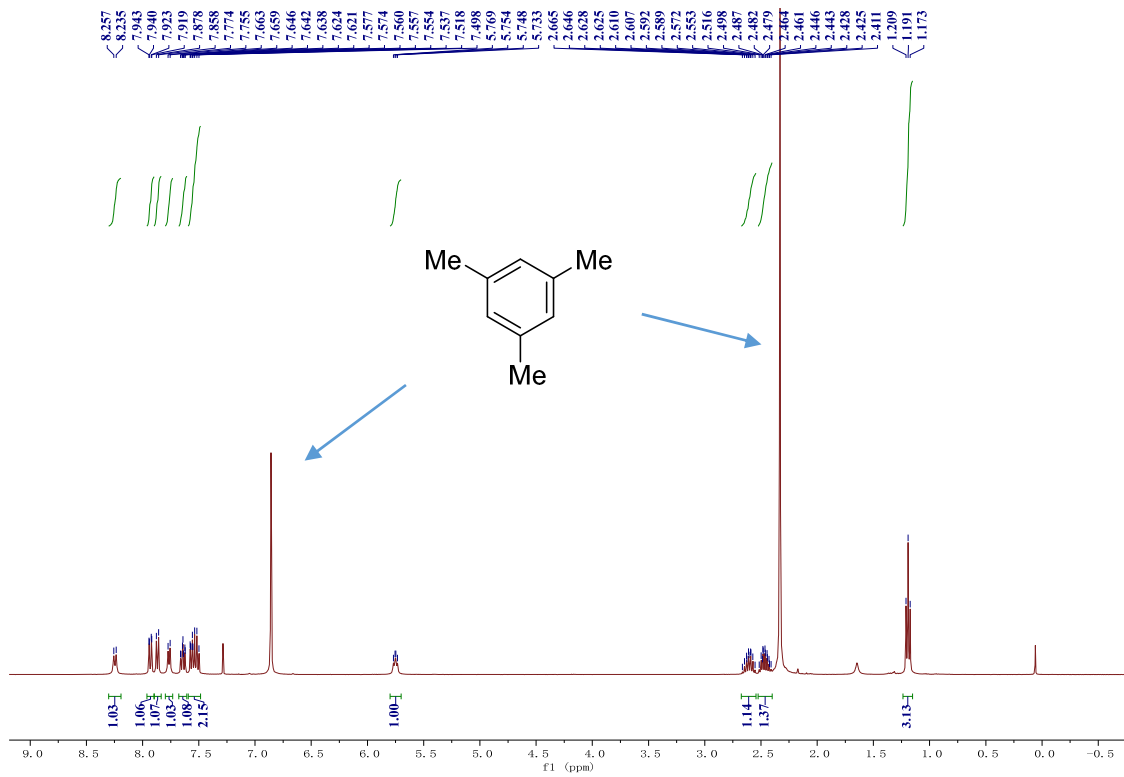

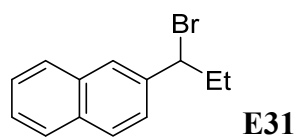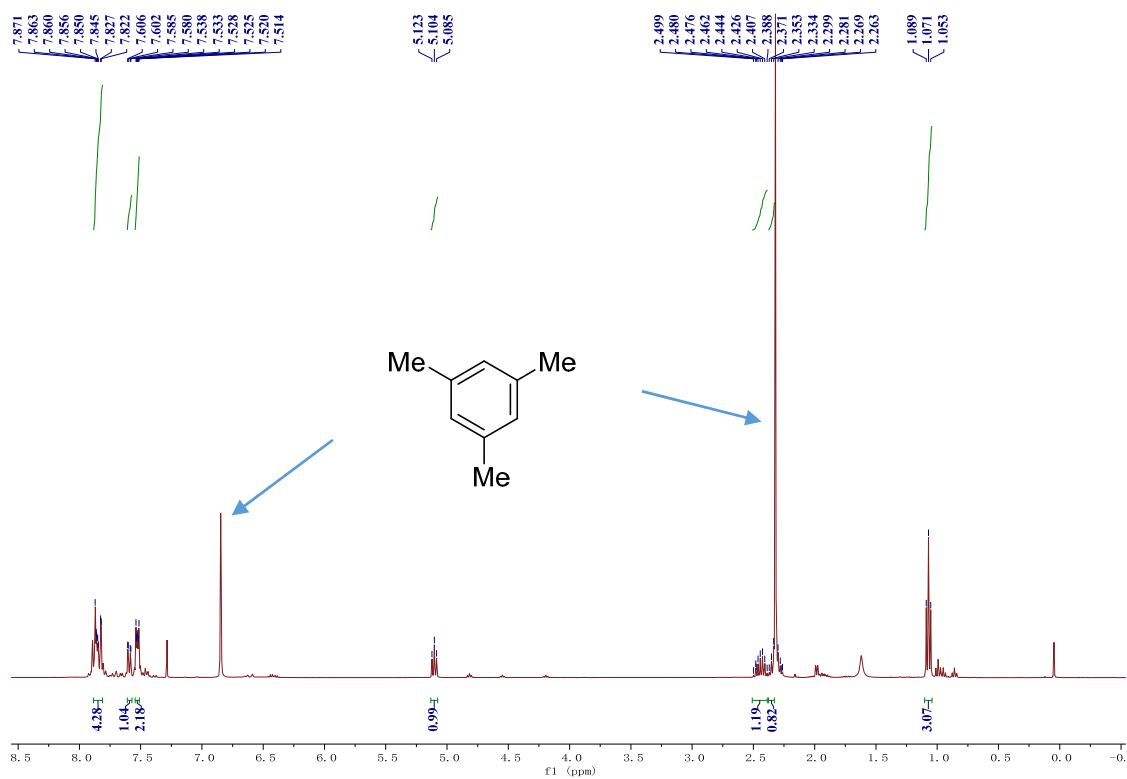

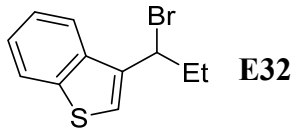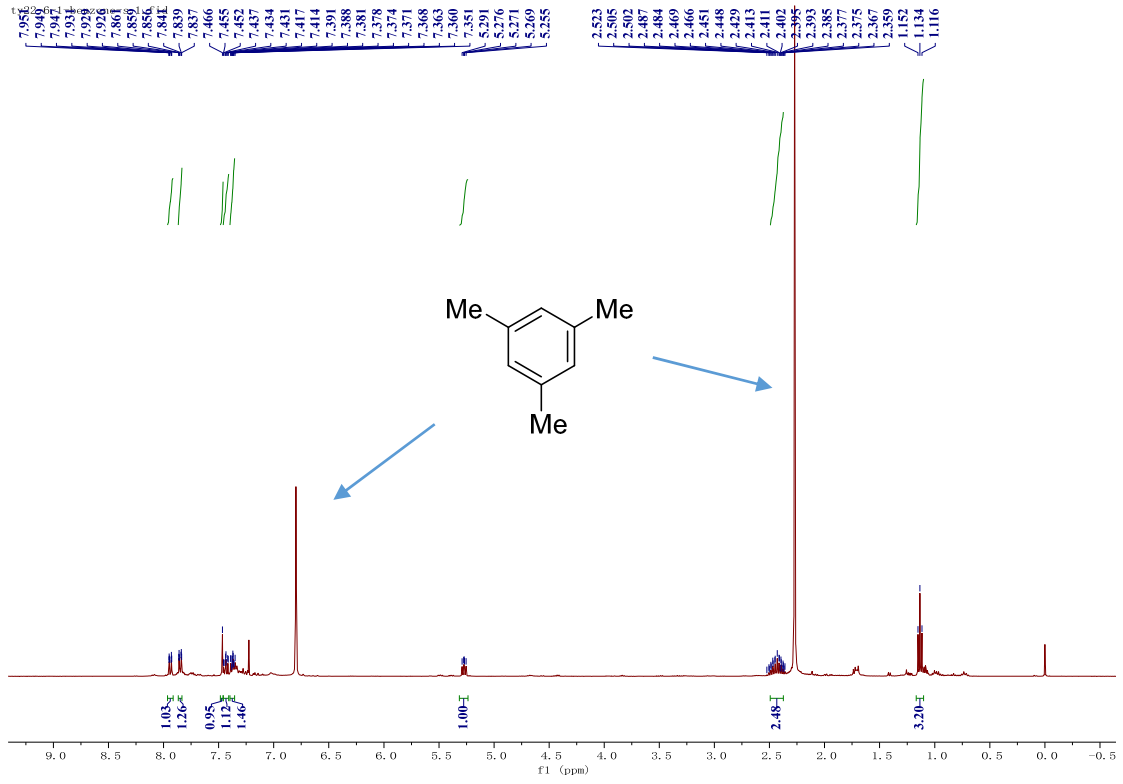

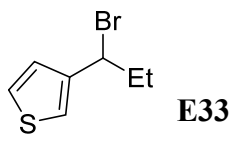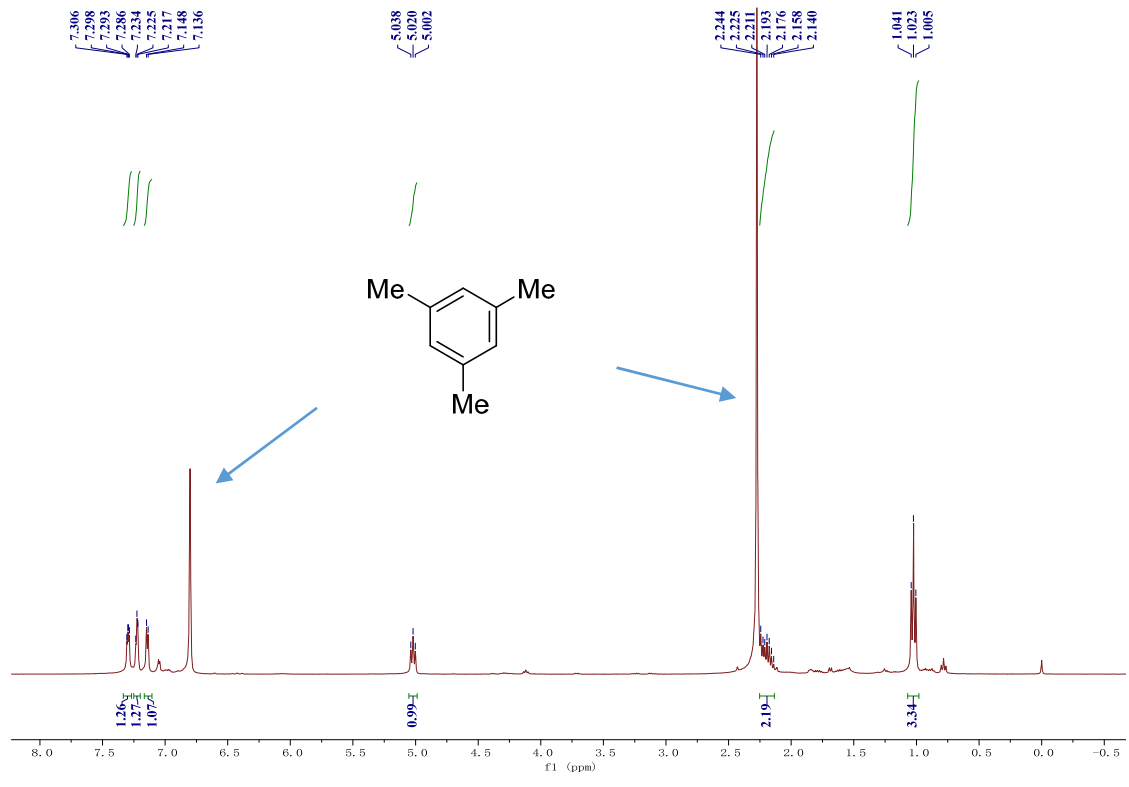

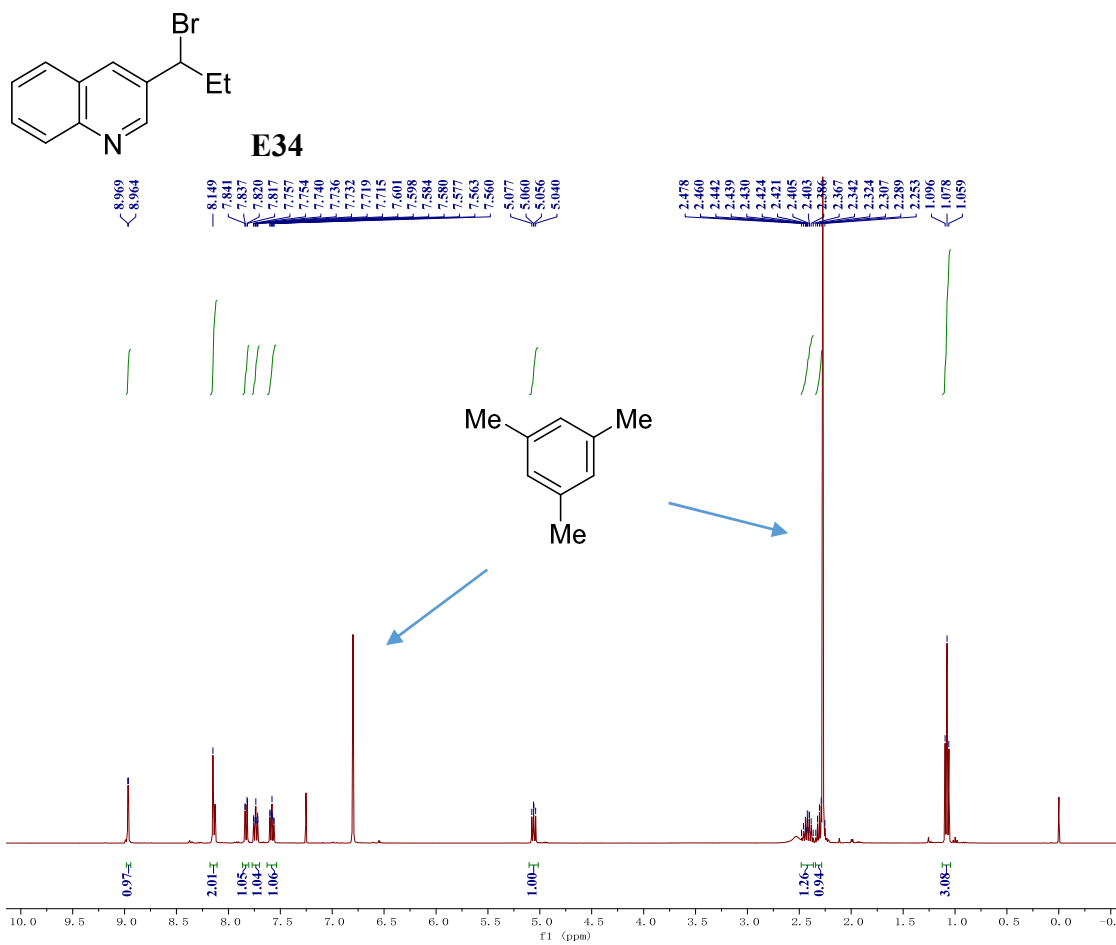

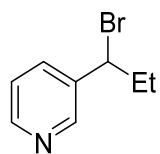

**E35**

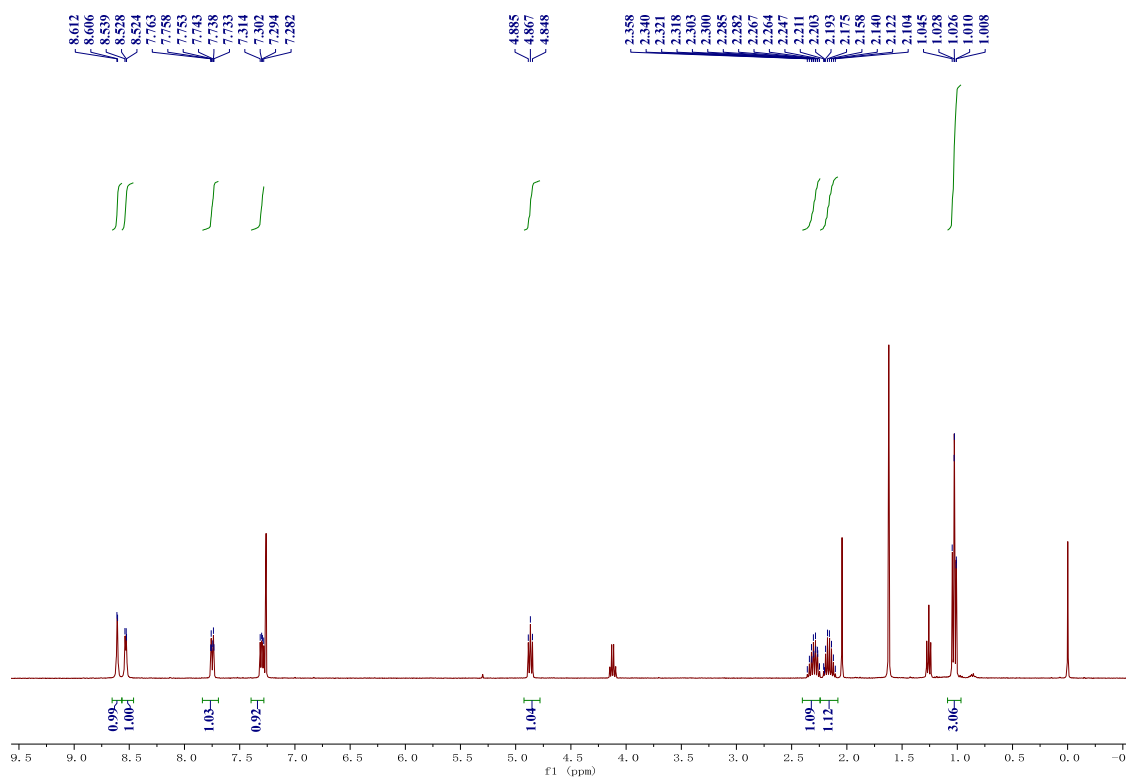



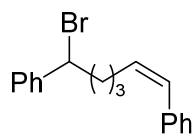

**E78**

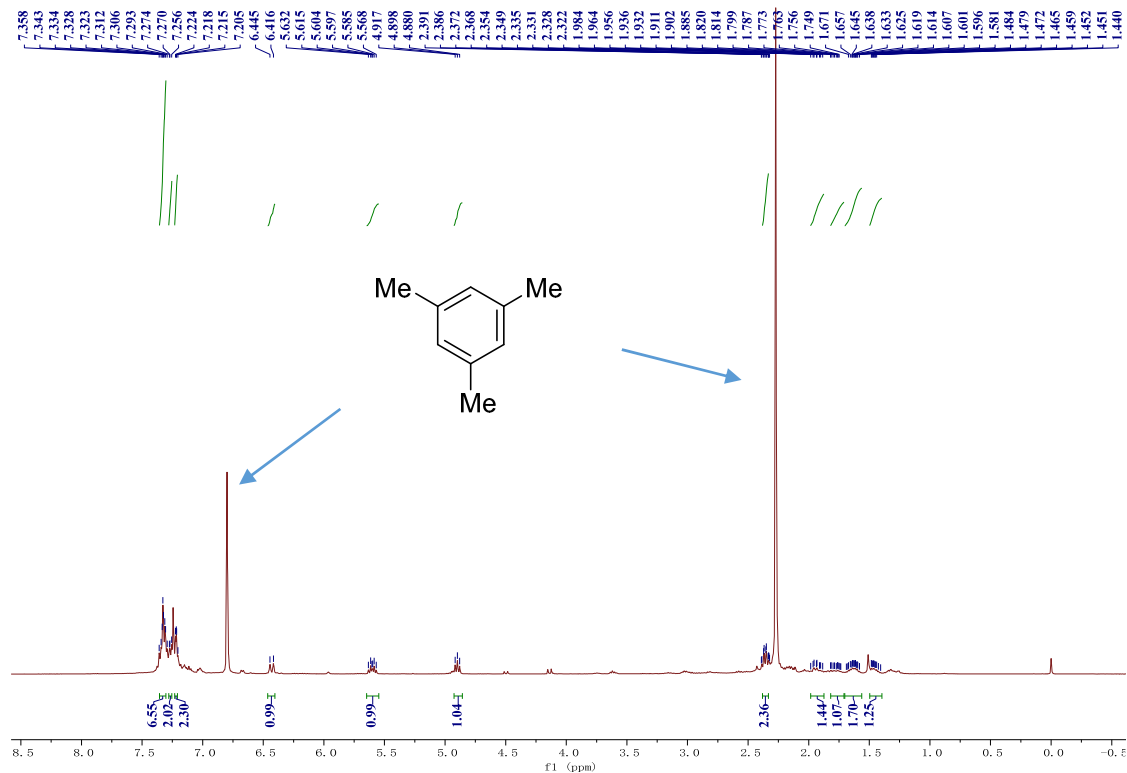

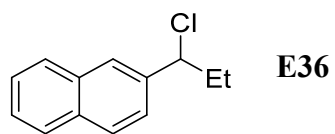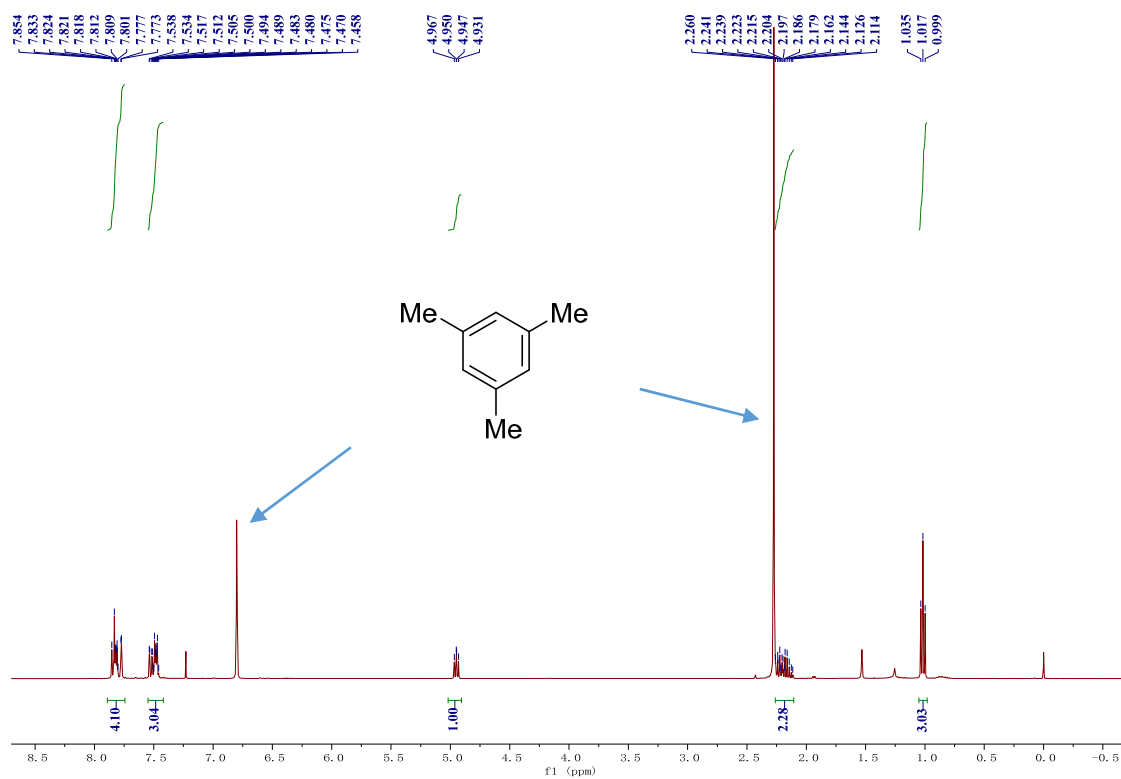

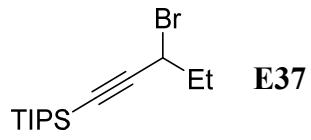

ty21-6-4-948PF.1.fid

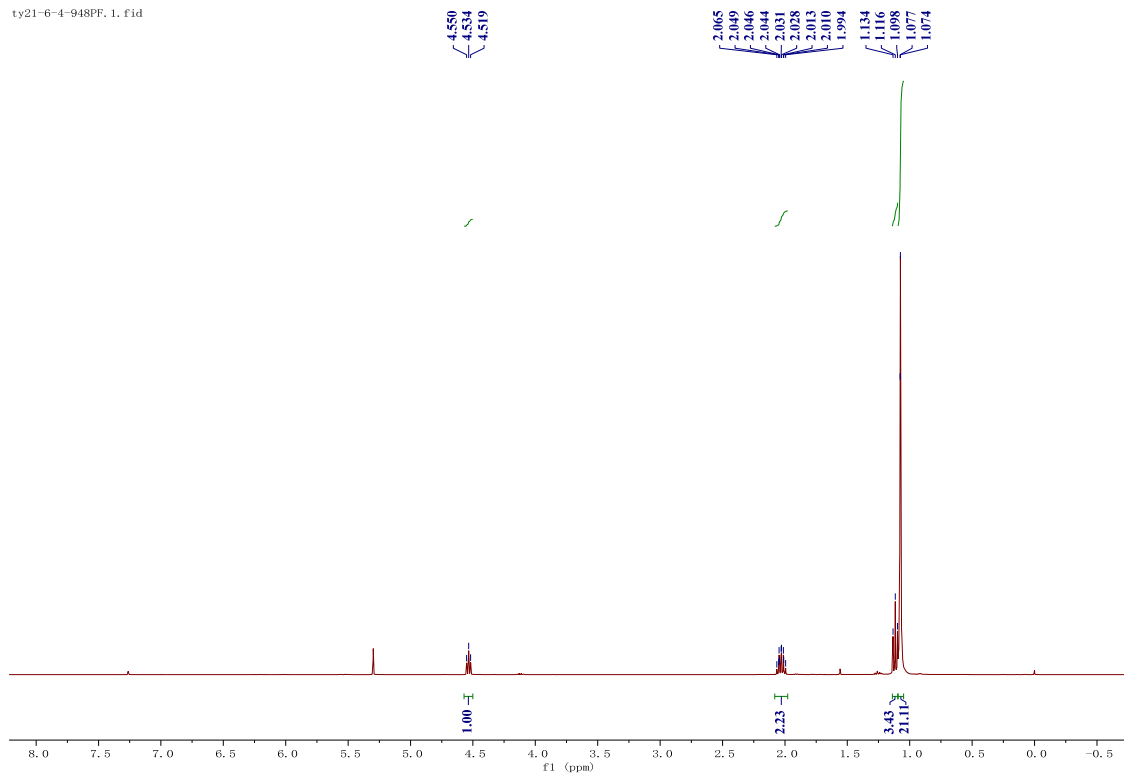

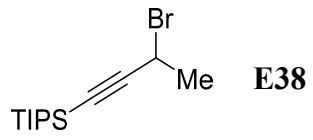

ty23-7-77-1242PD, 1.fid

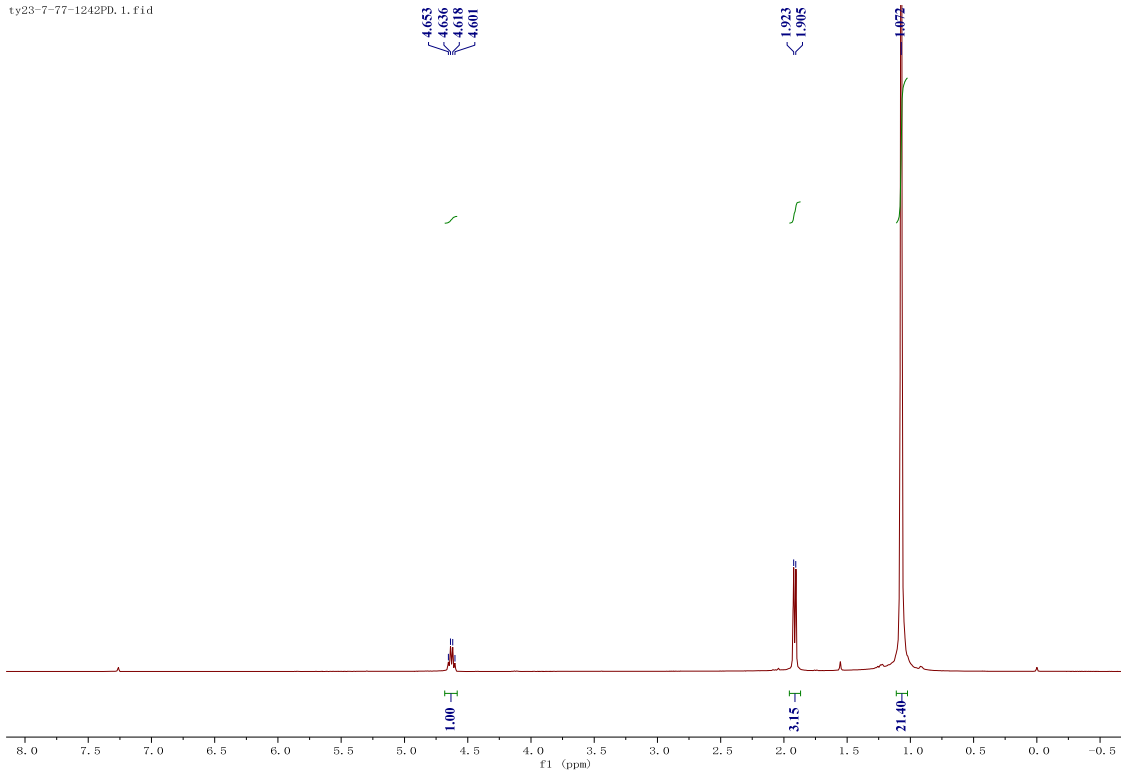



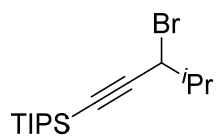

E40

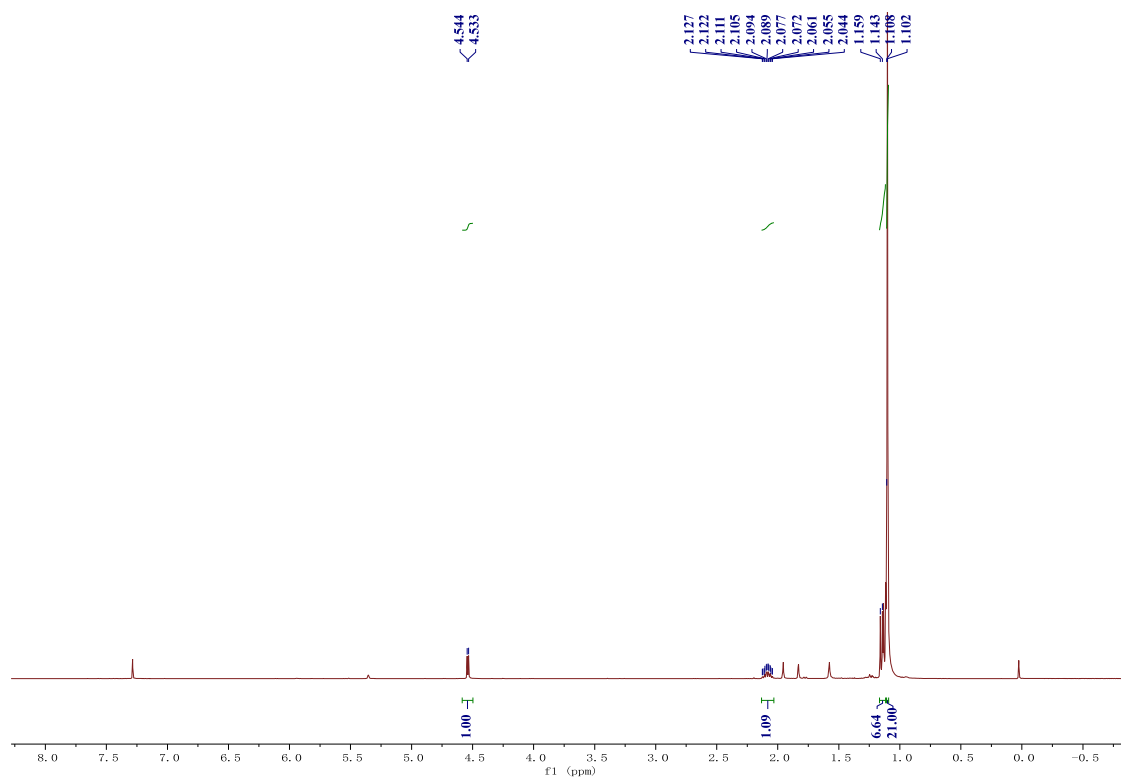

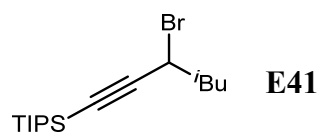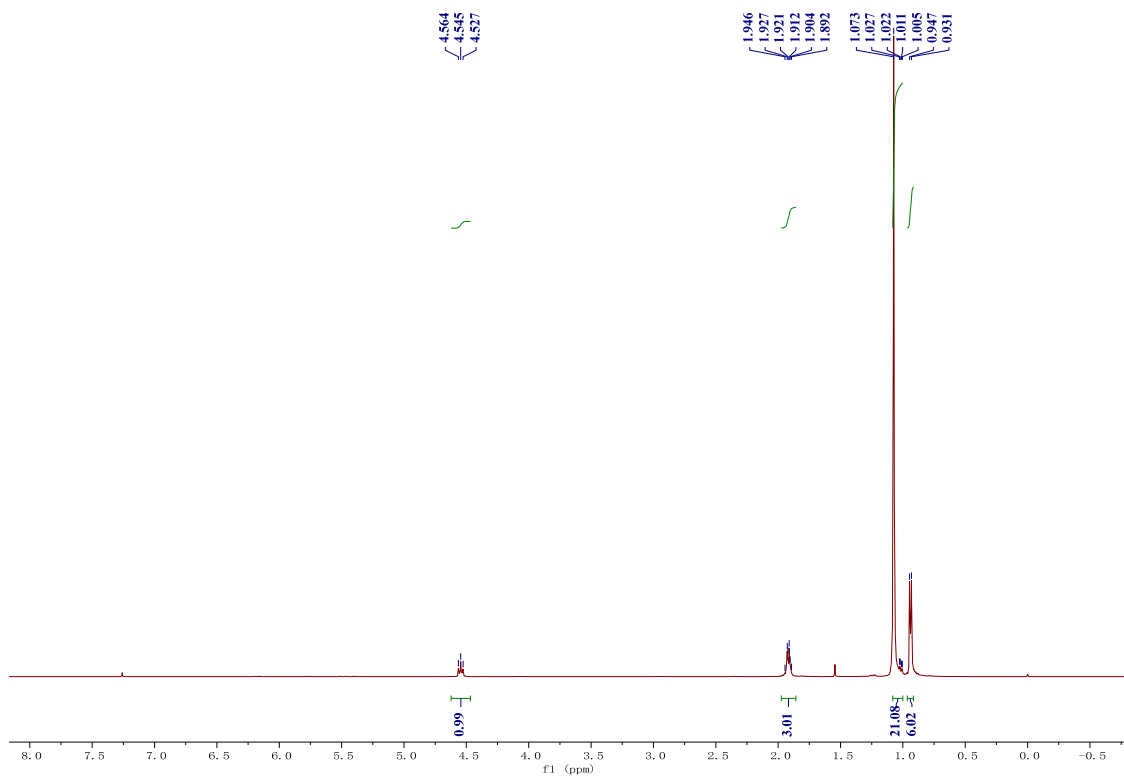

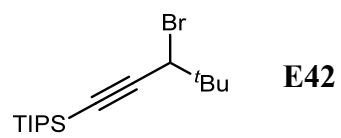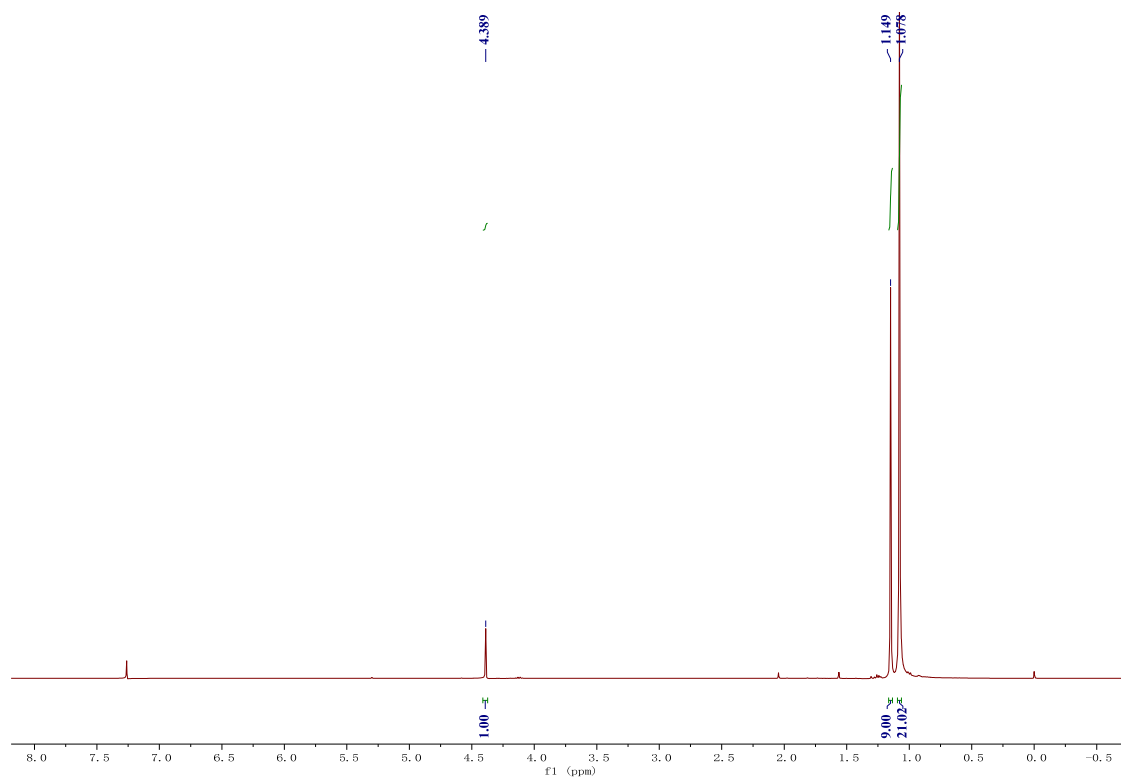



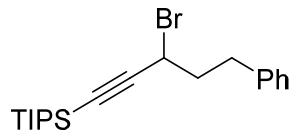

**E43**

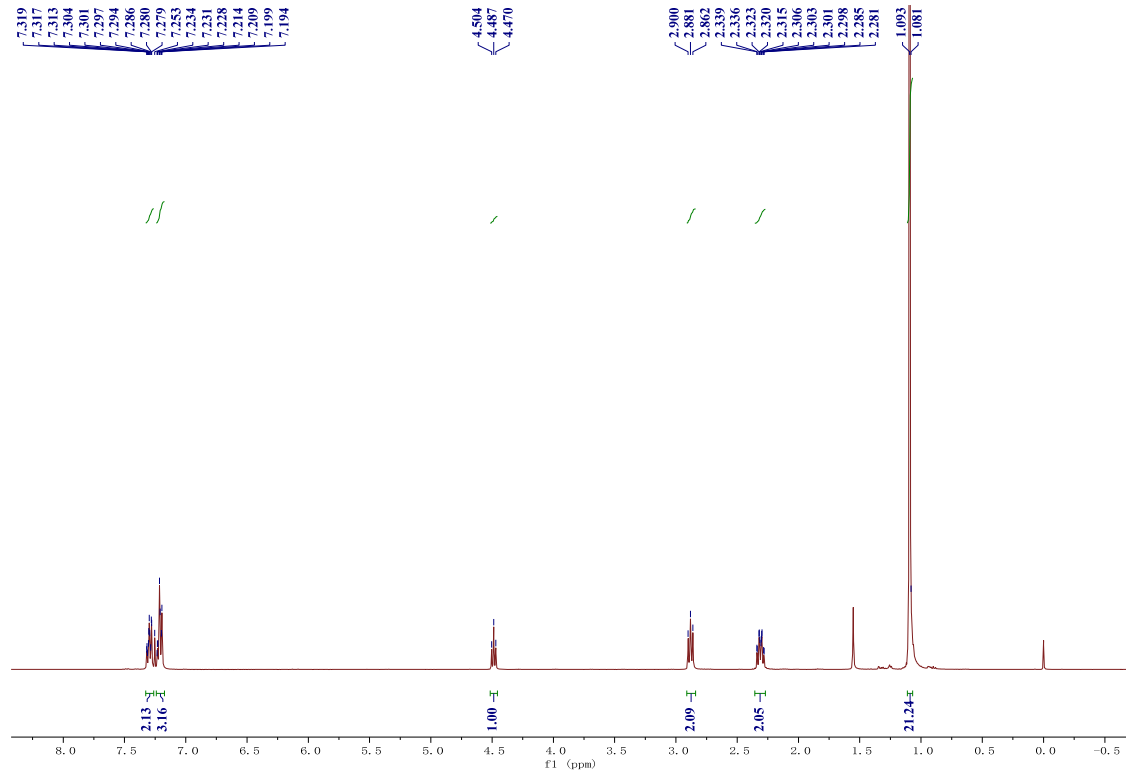

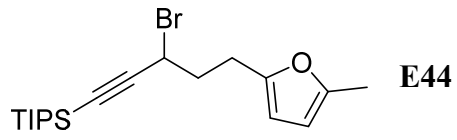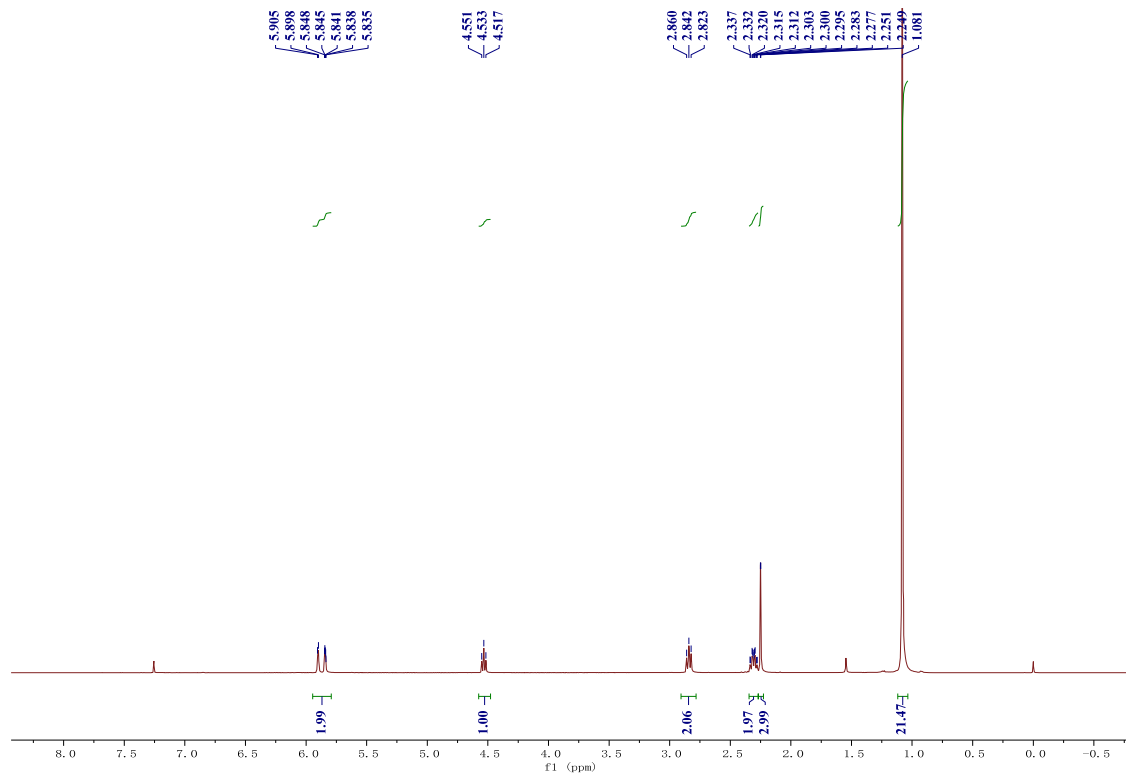



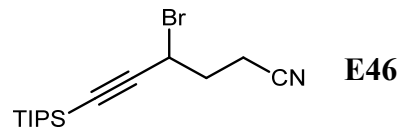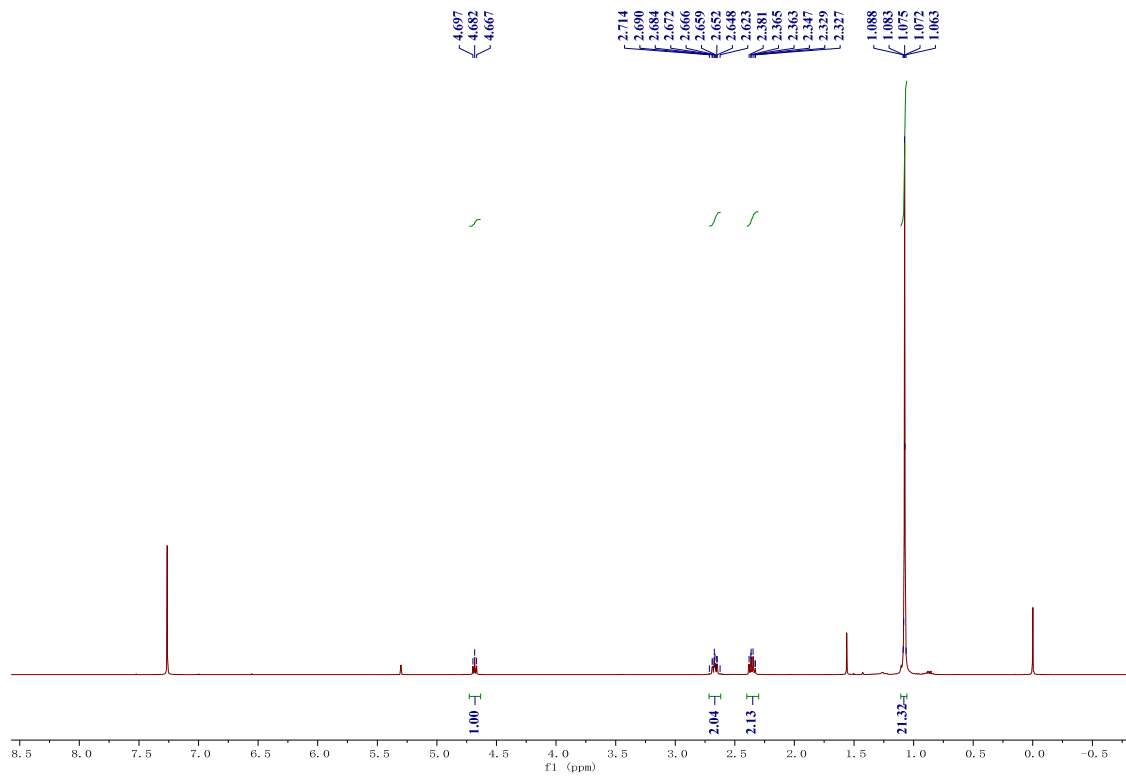

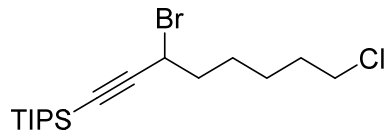

E47

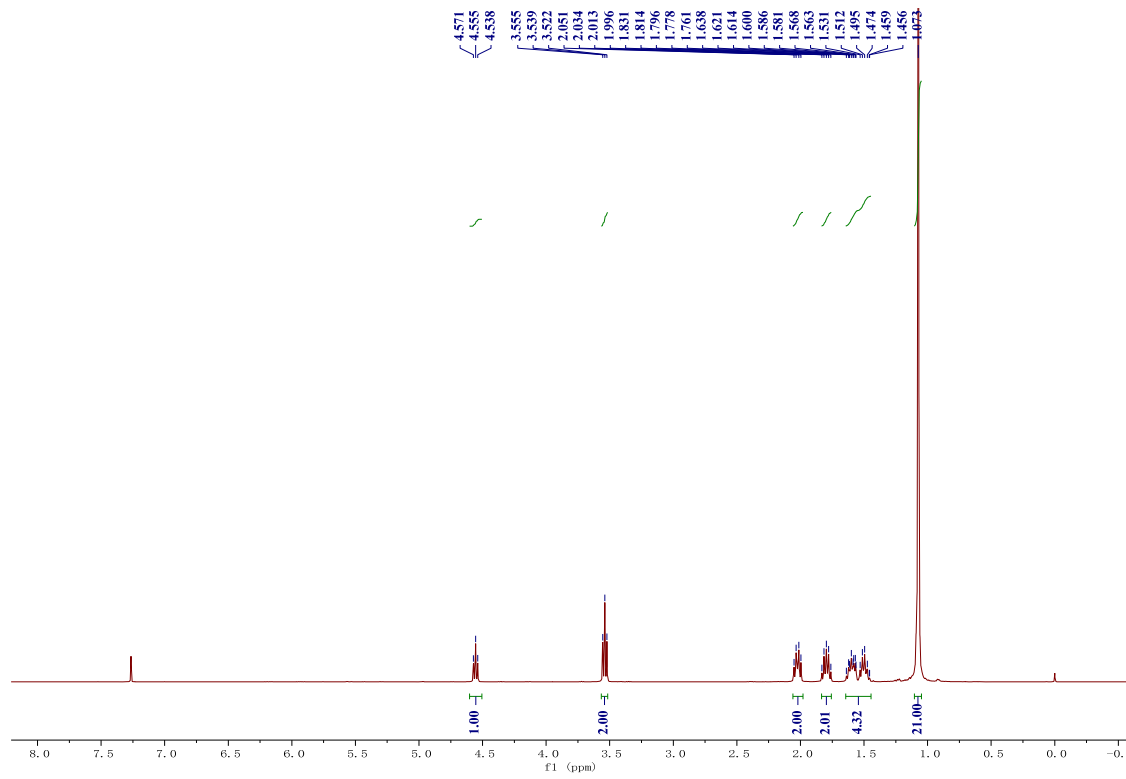

ga22-113-a, 13, f1.d

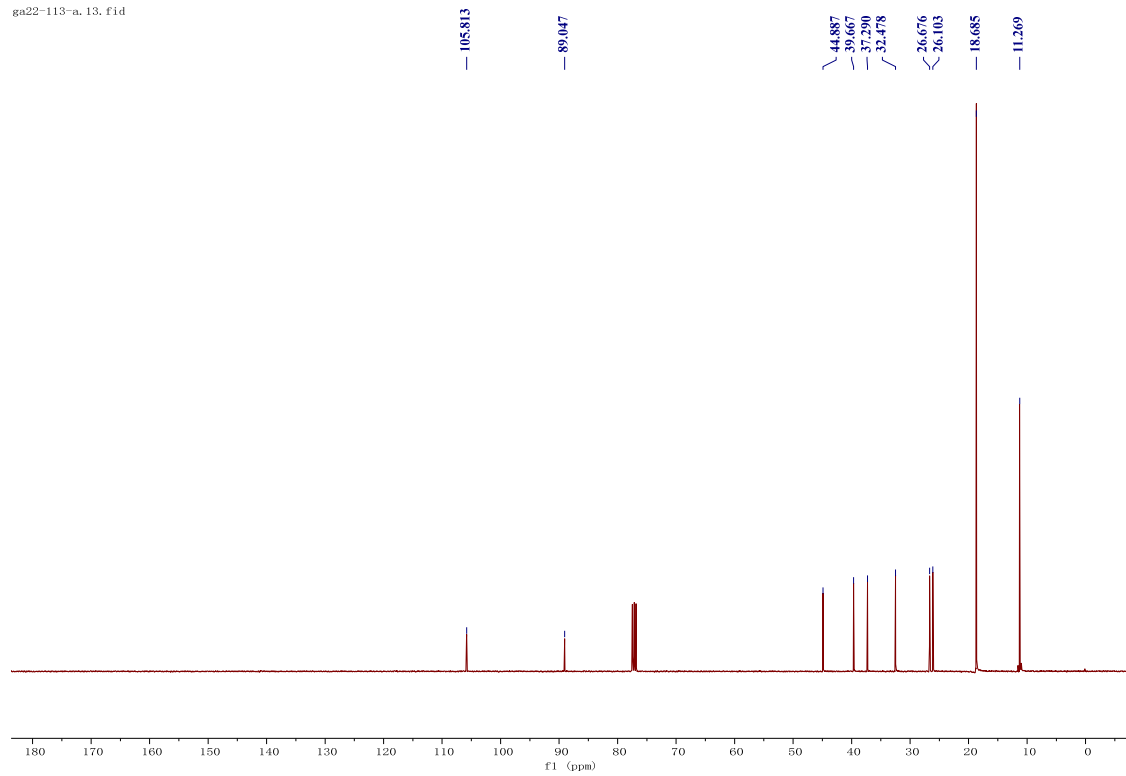

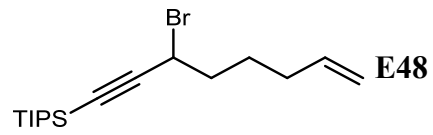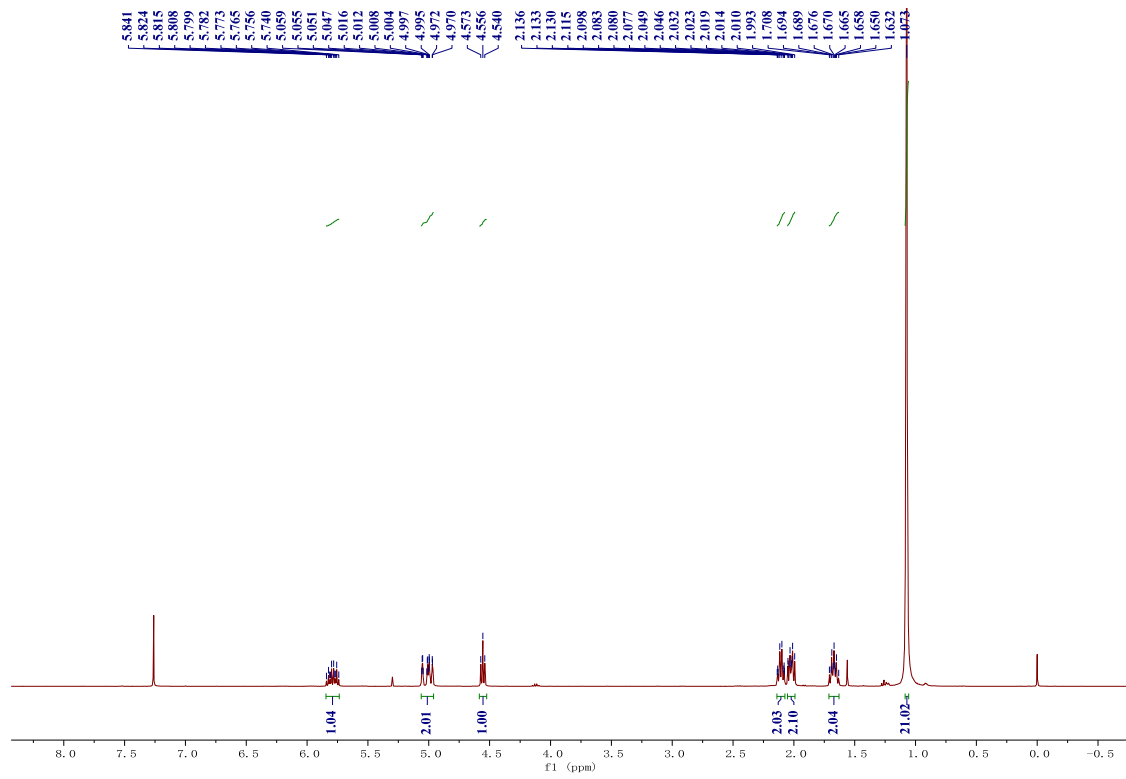

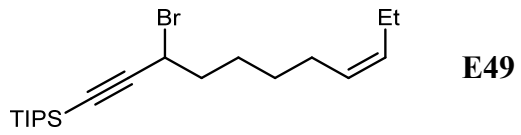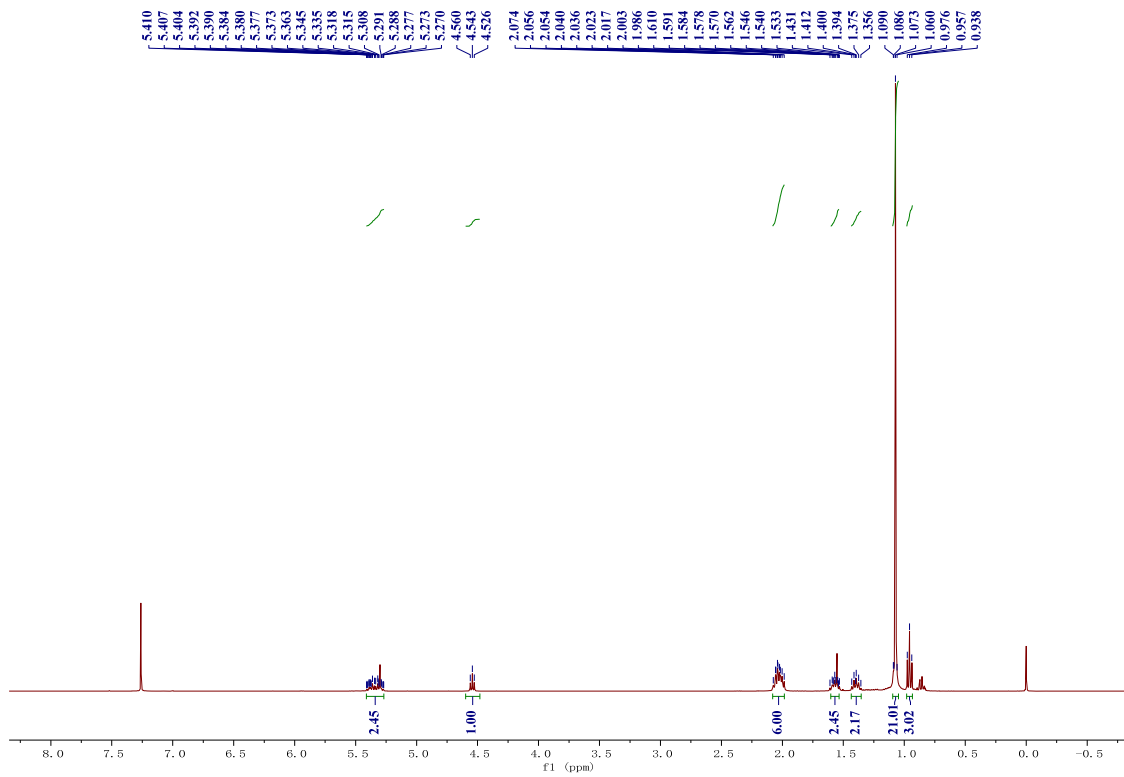

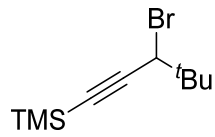

**E50**

E50 ga-tms-tbu. 1. fid

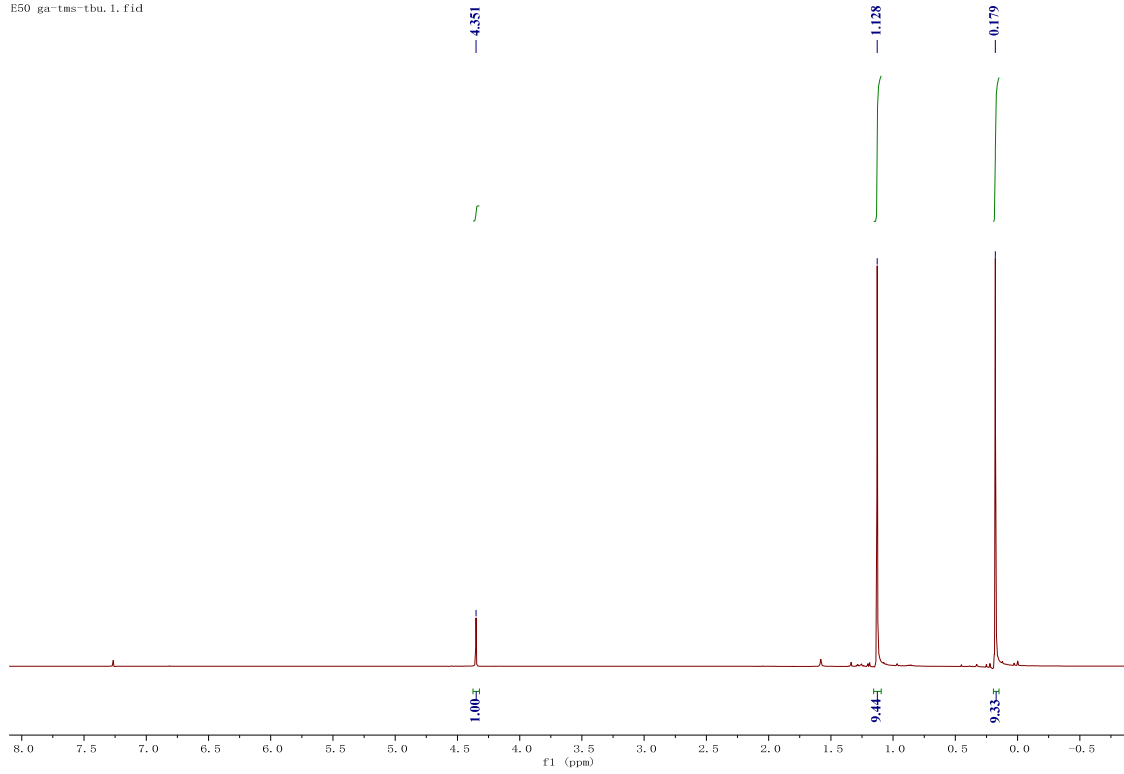

E50 ga-tms-tbu. 13. fid

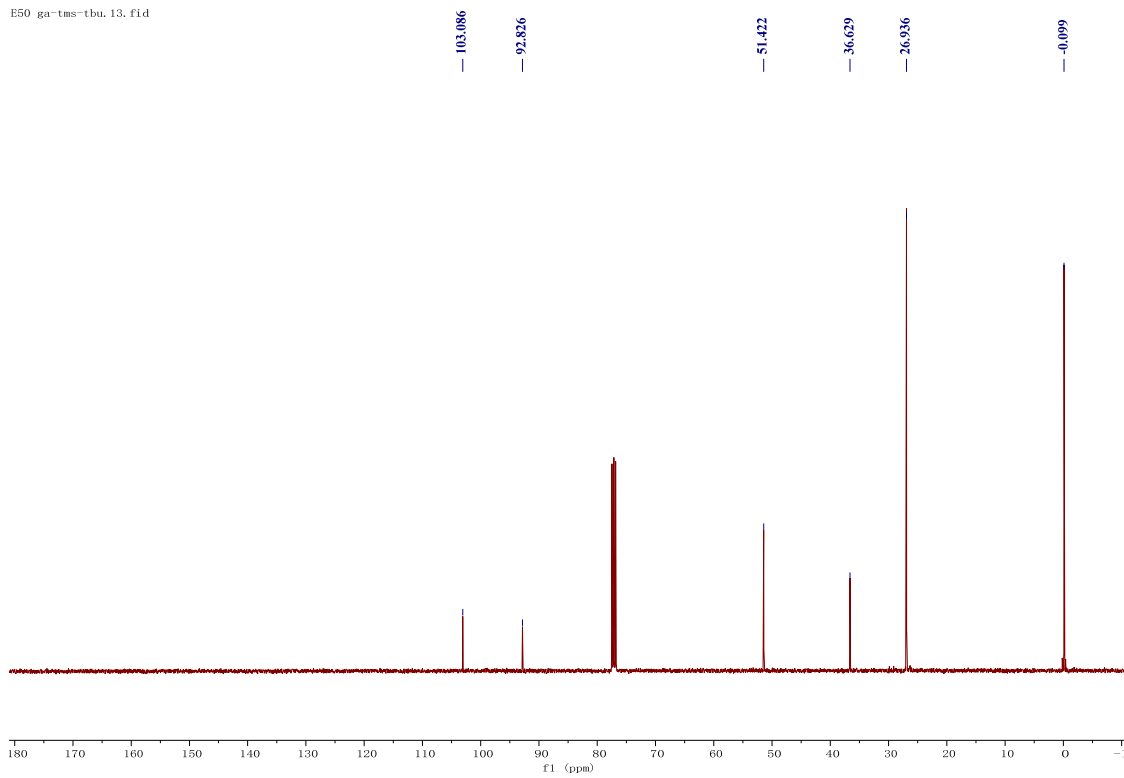



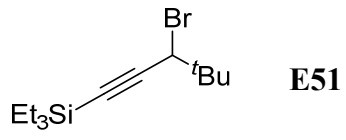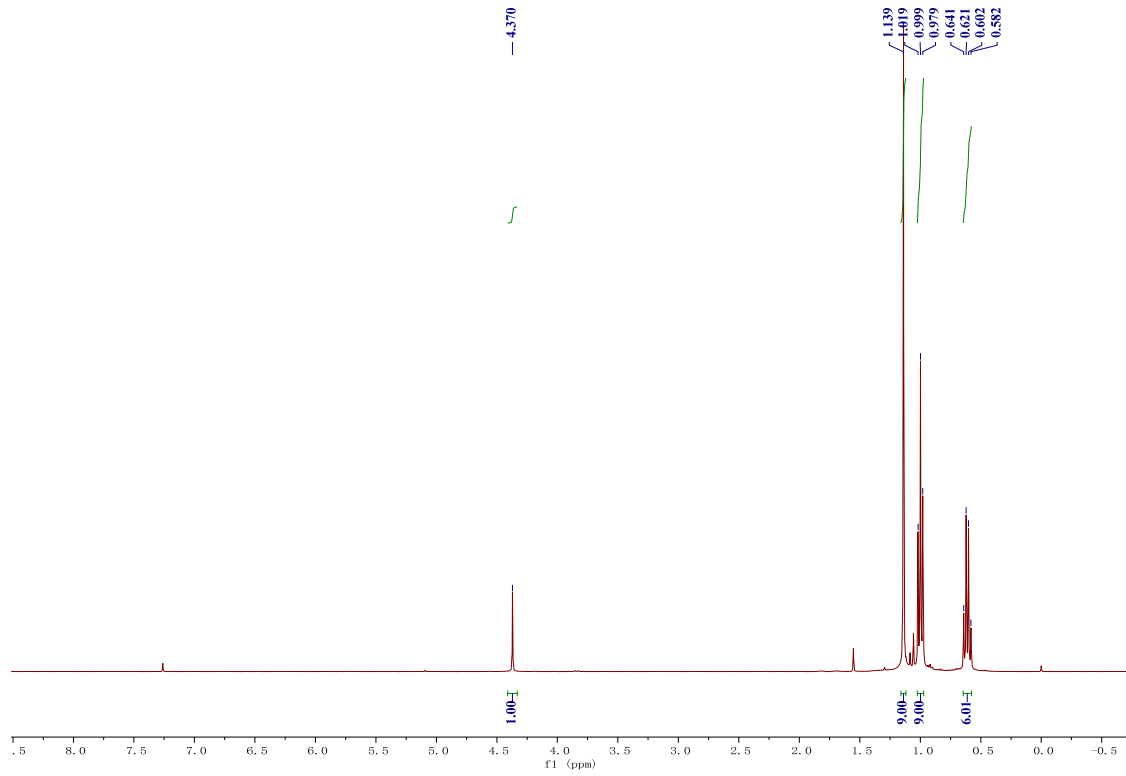

E51 ga22-184-iii, 13, fid

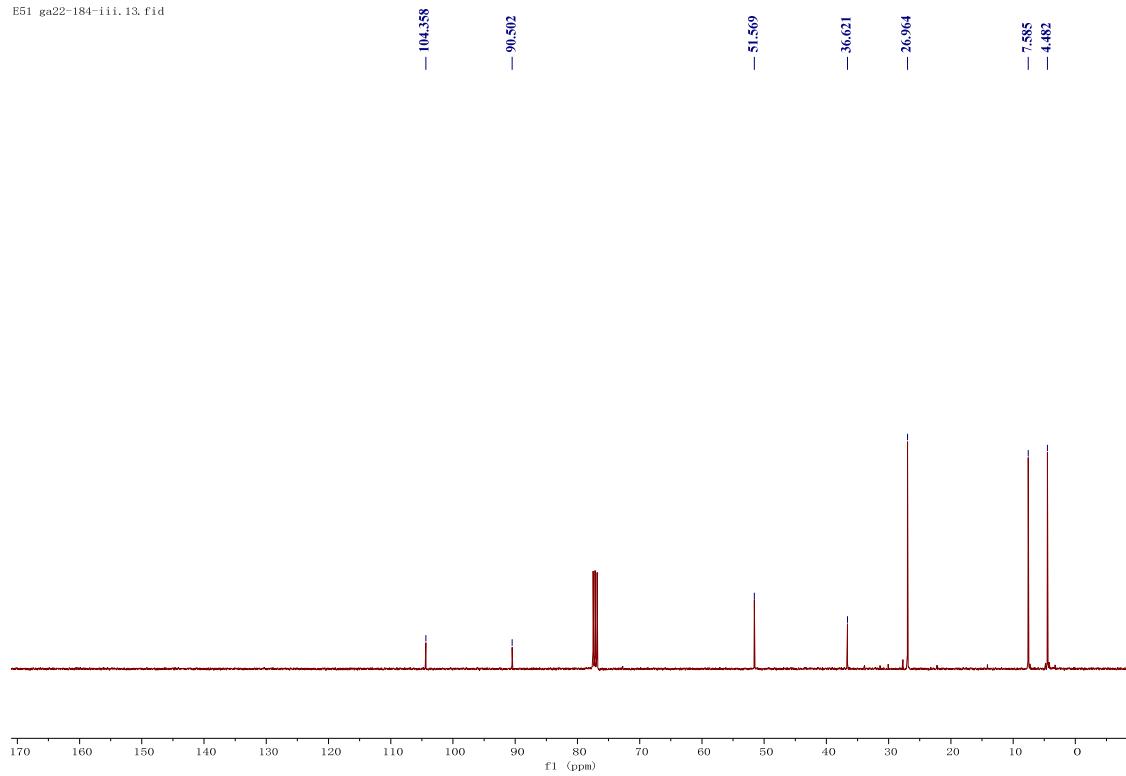

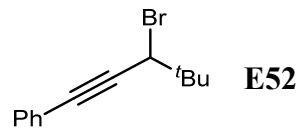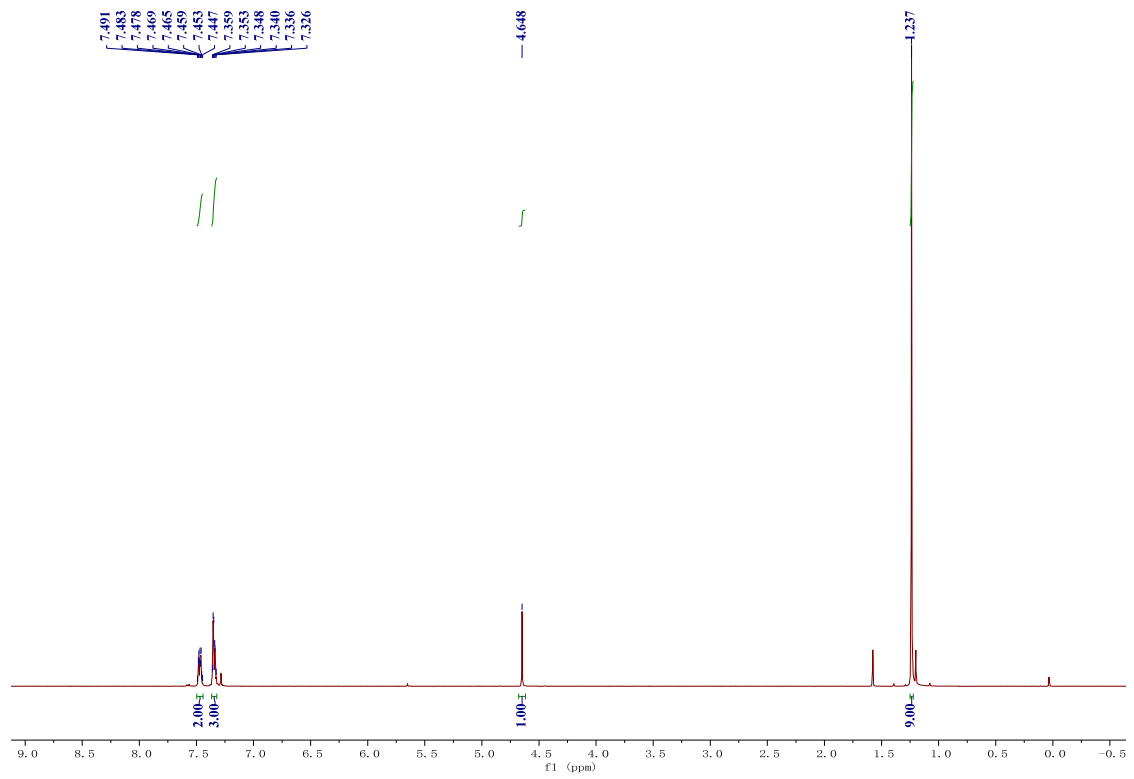

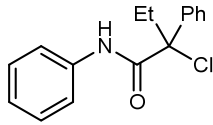

E53

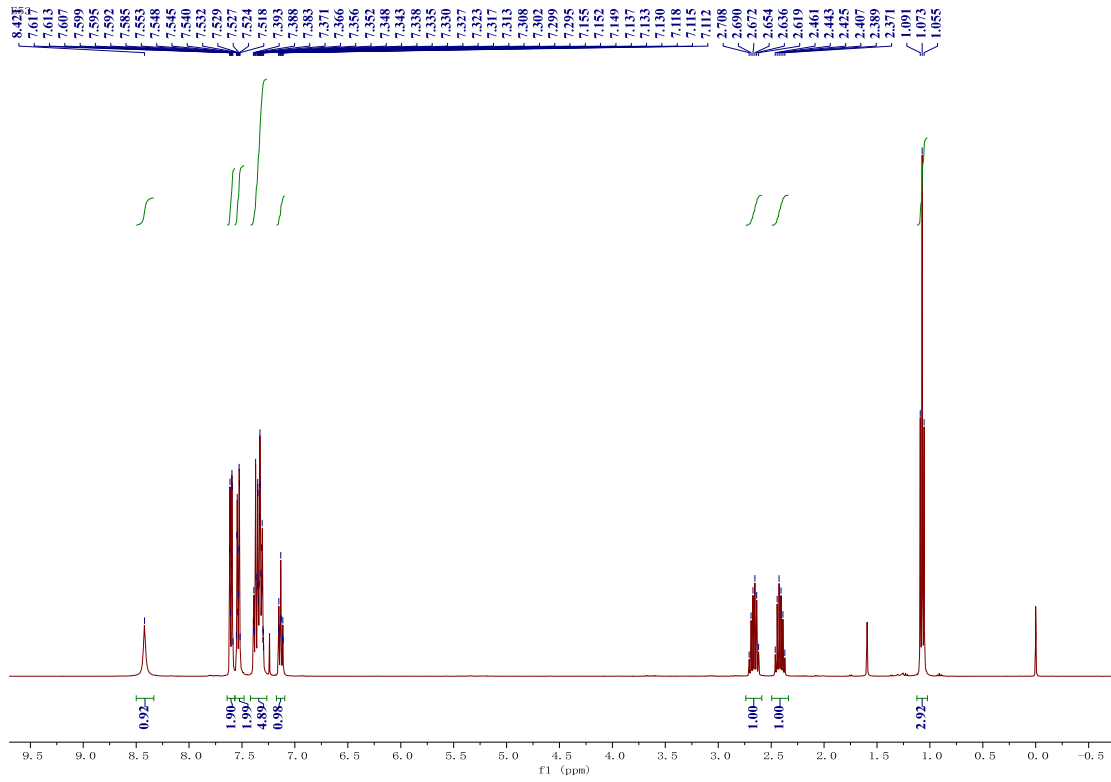

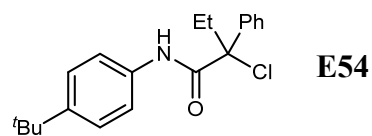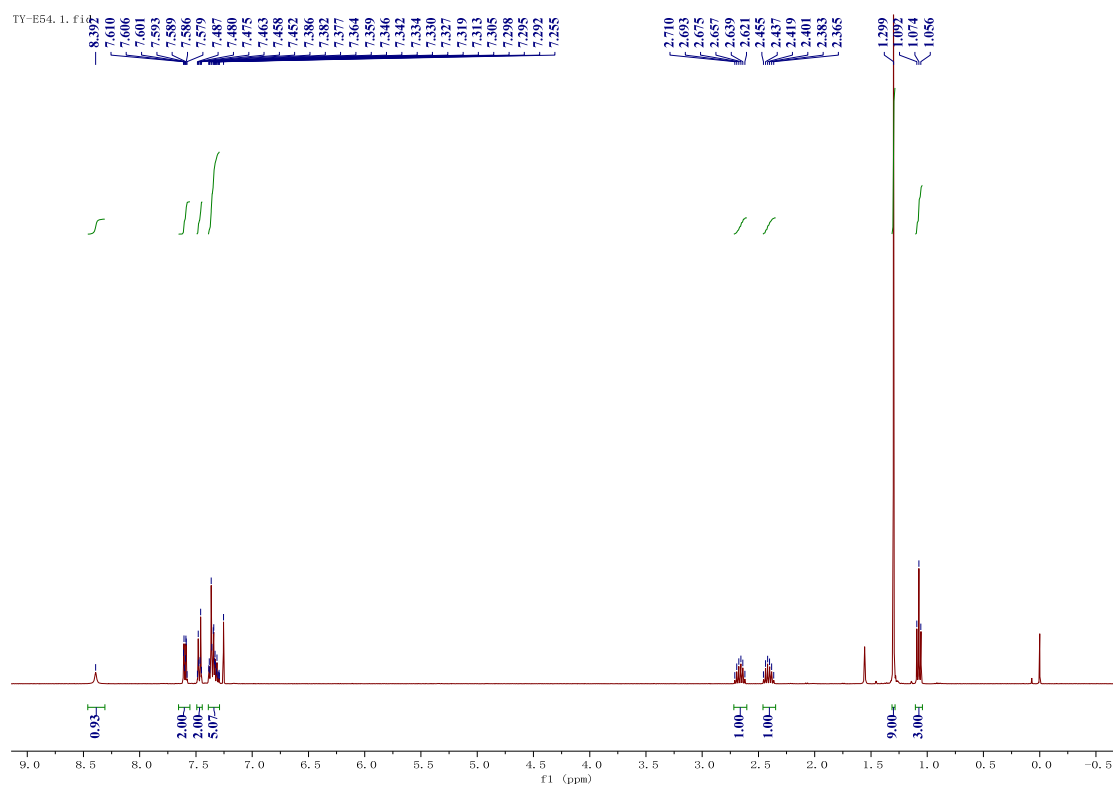

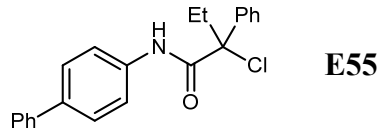

TY-E55.1.fid

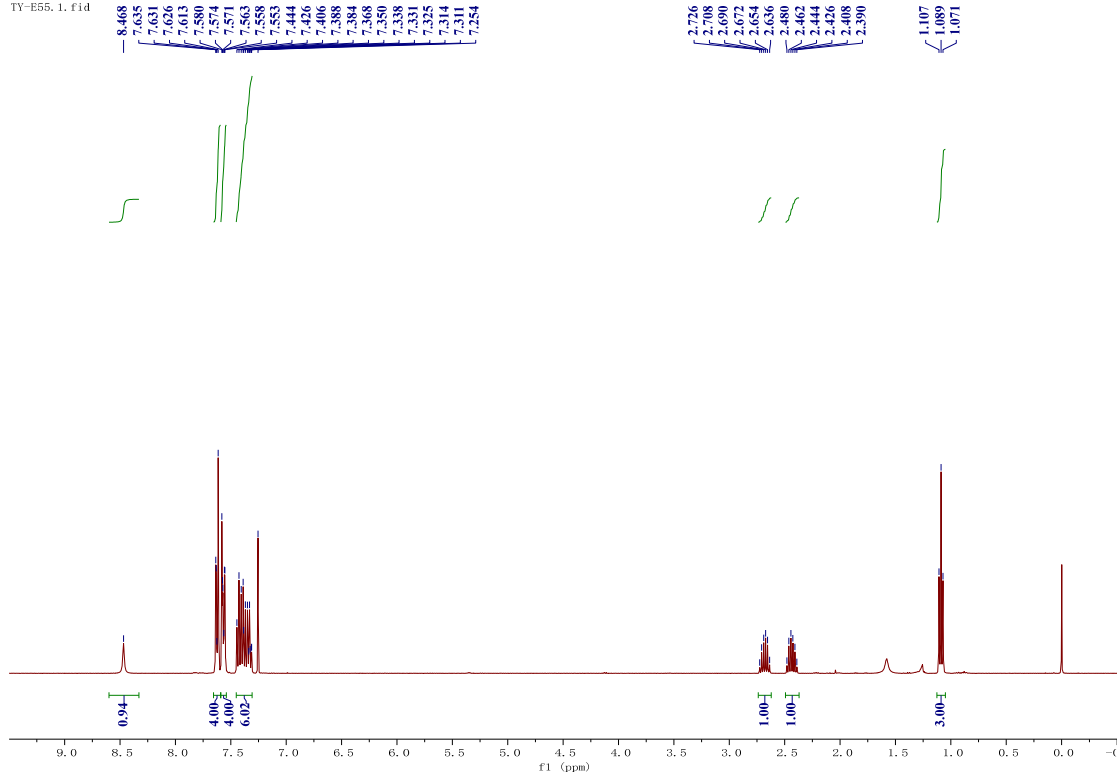

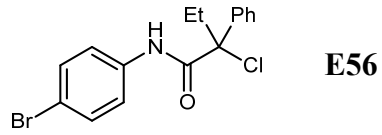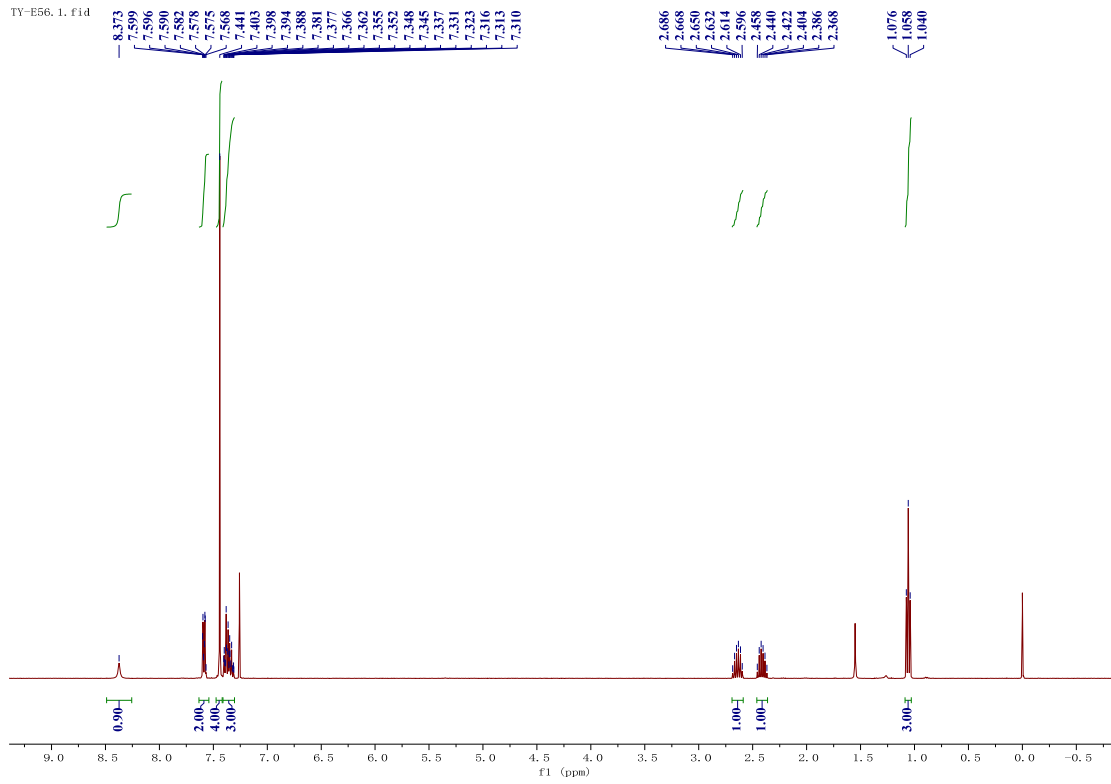

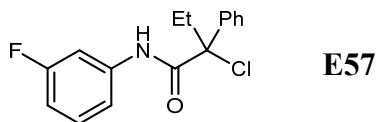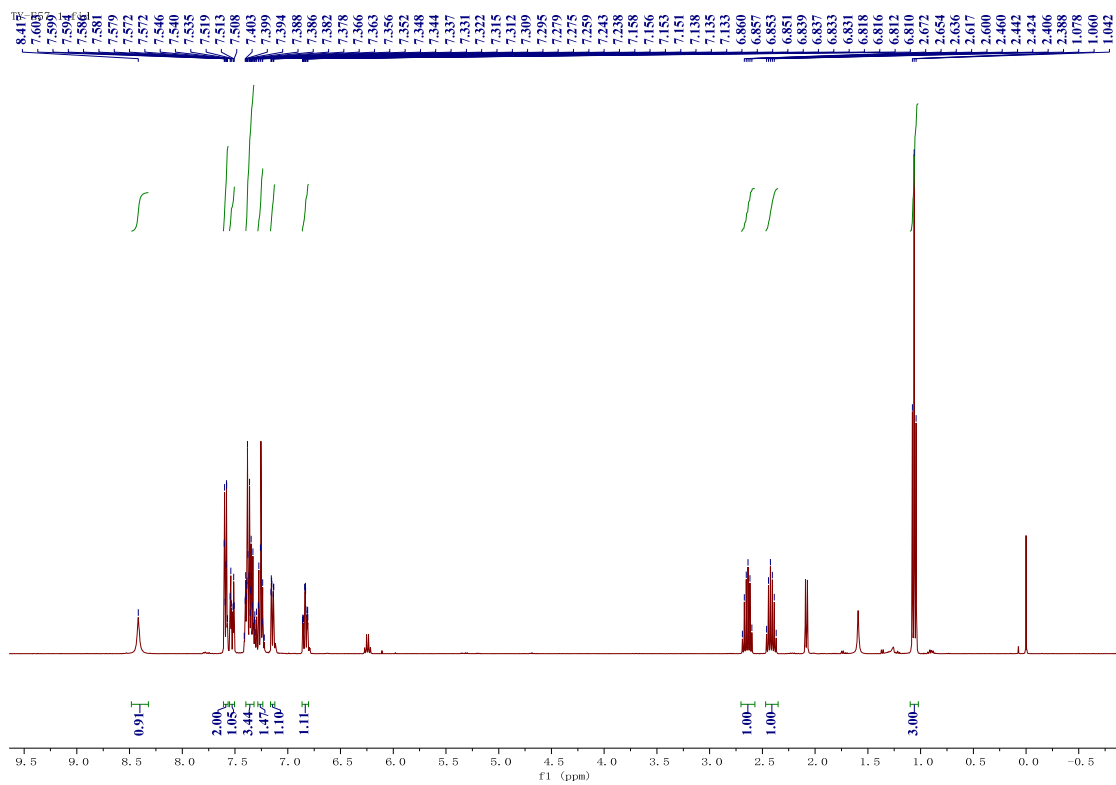

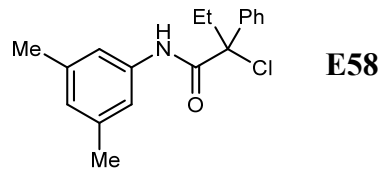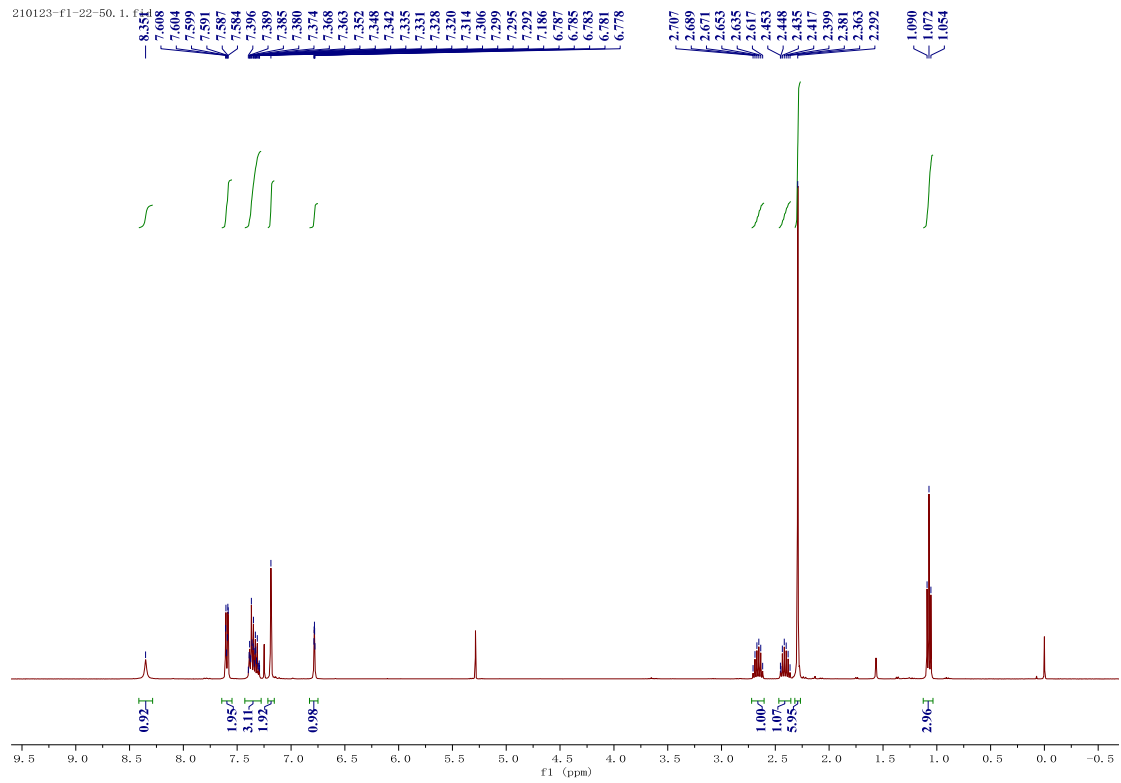



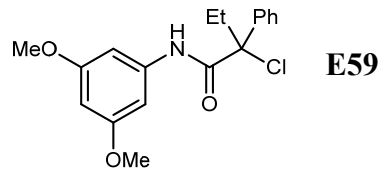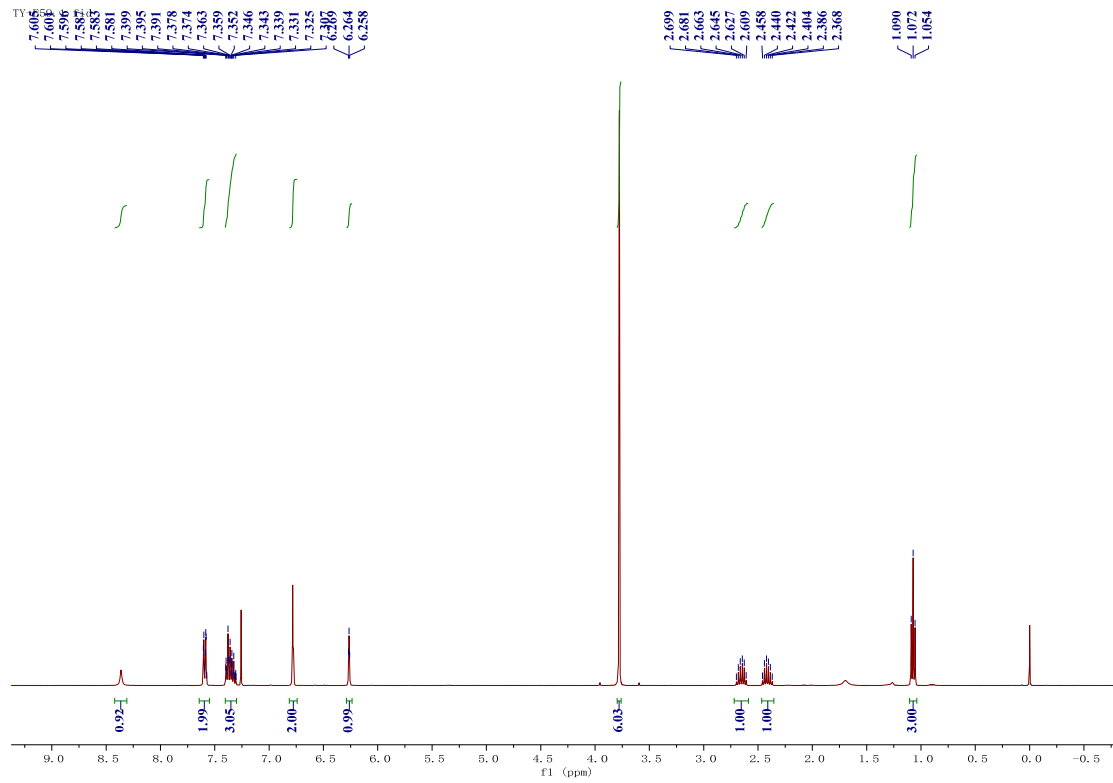

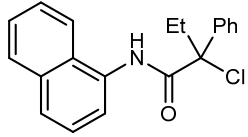

**E60**

ga22-206-b-p. 1. f1.d

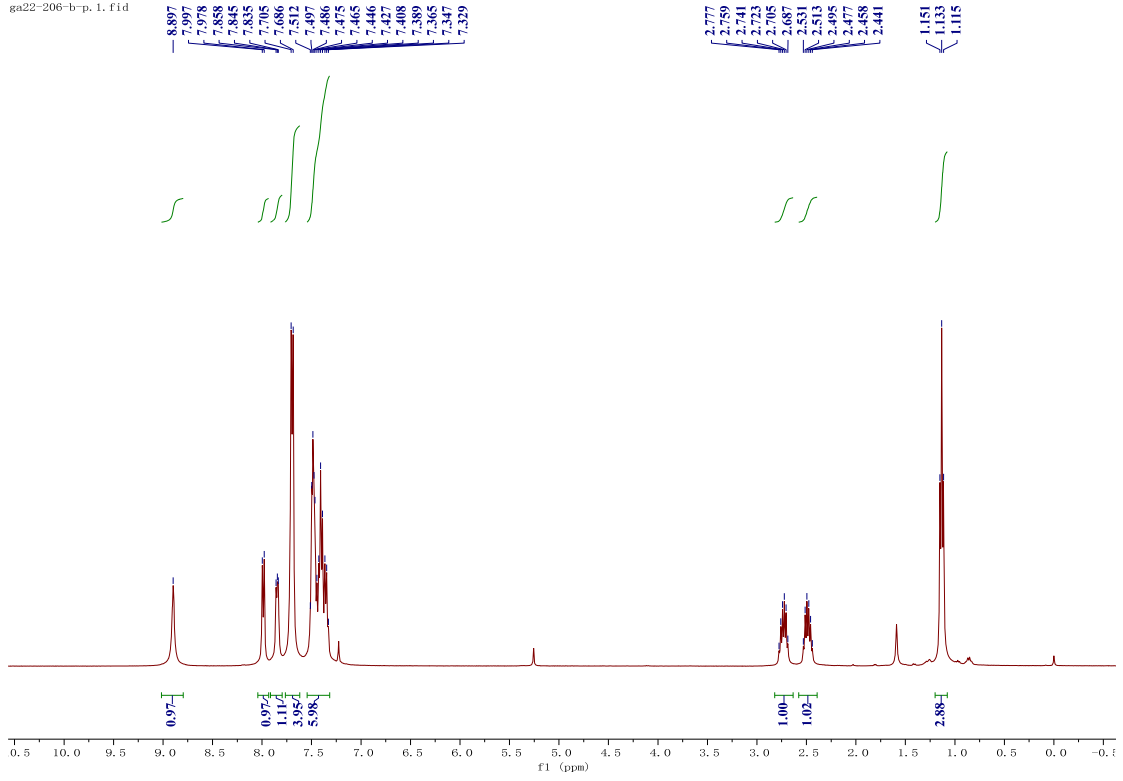

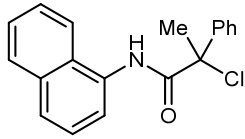

**E61**

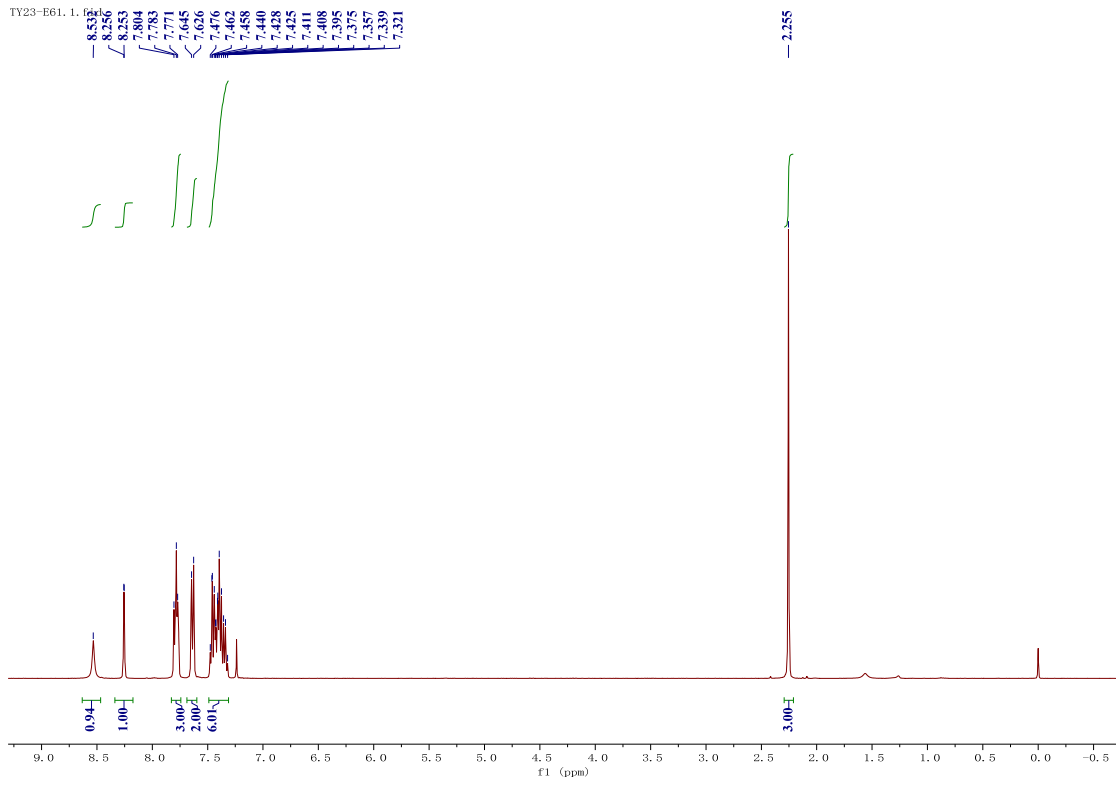

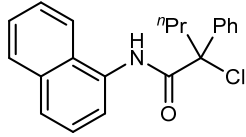

**E62**

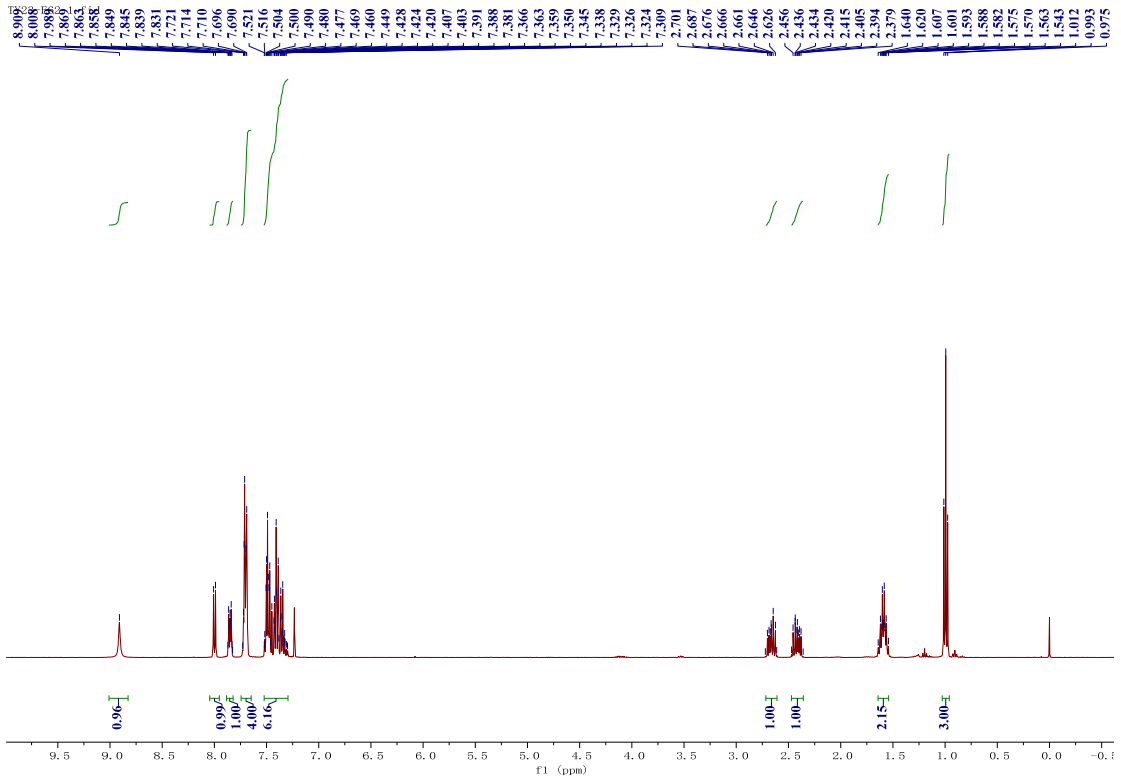

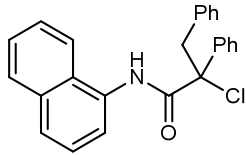

**E63**

TY23-E63. 1. f1d

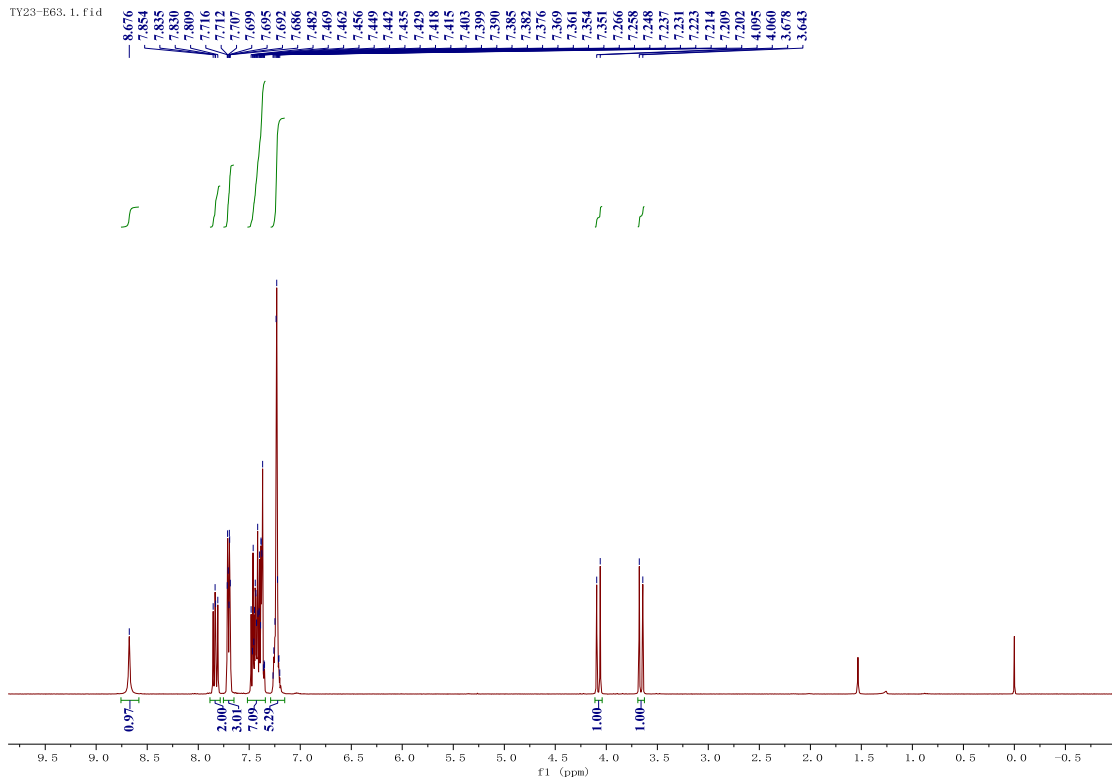

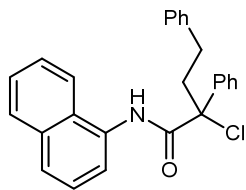

**E64**

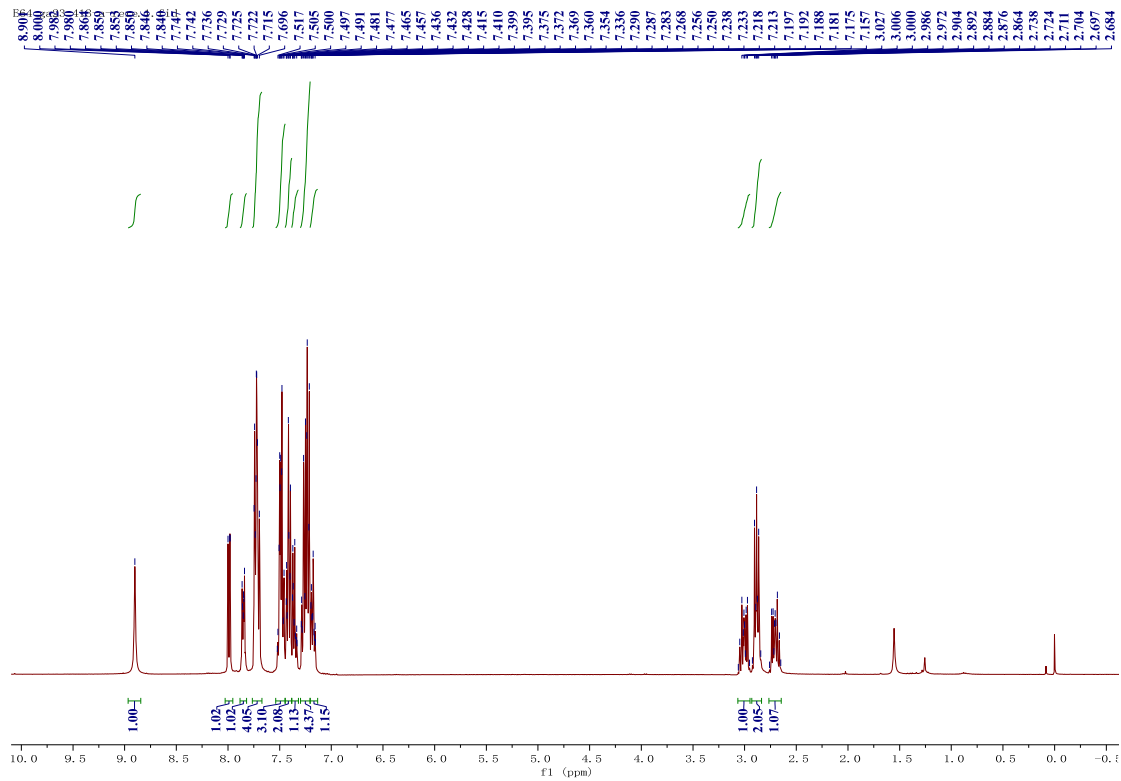

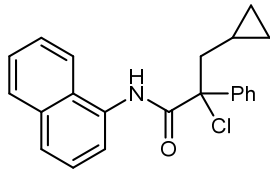

**E65**

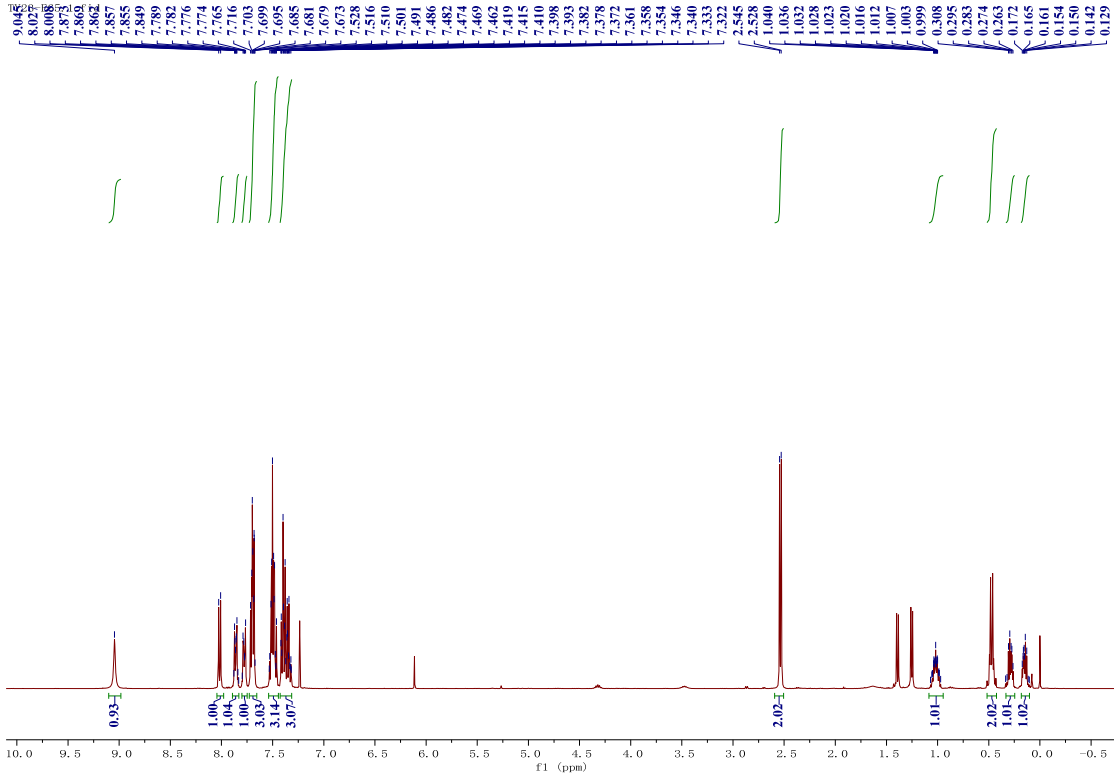

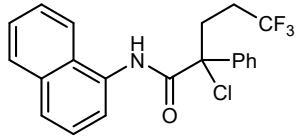

**E66**

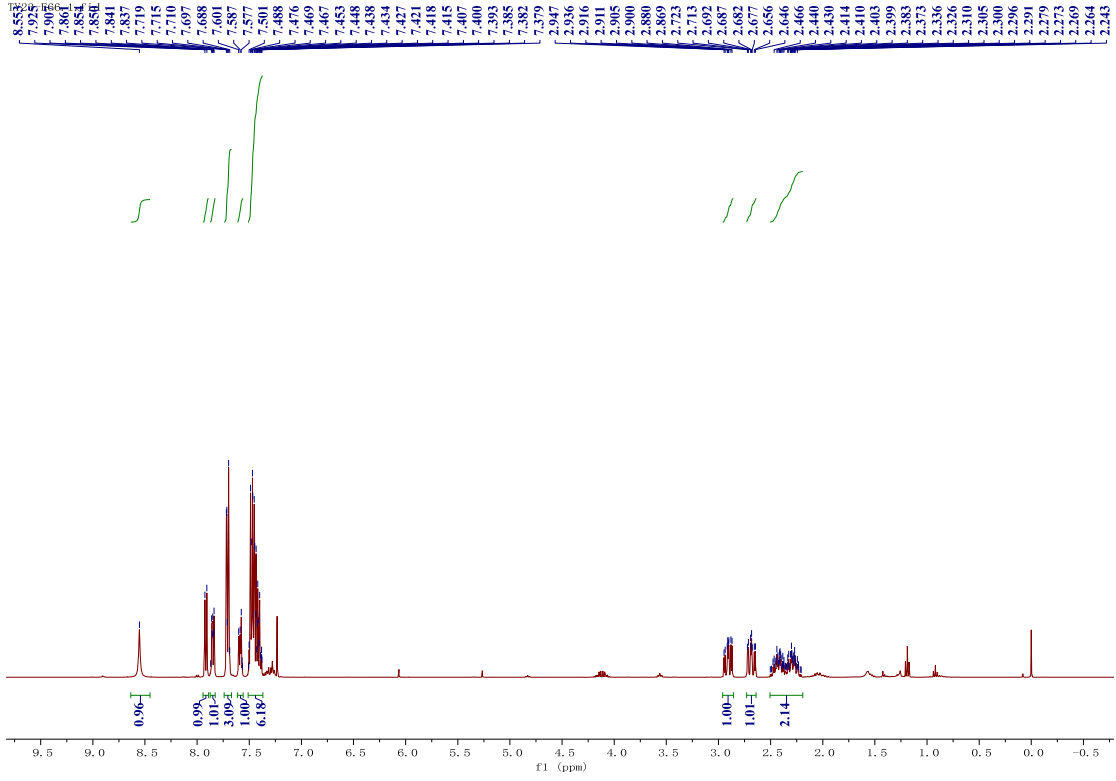



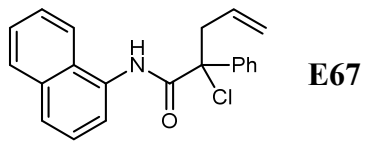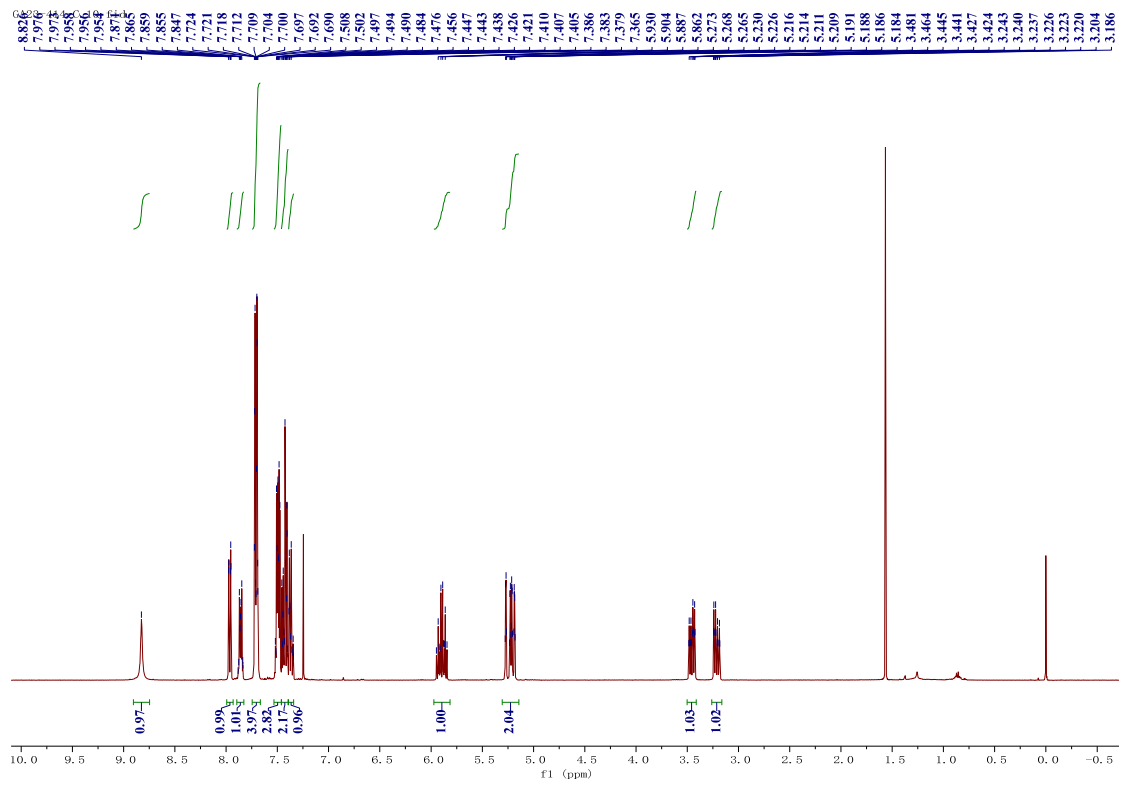

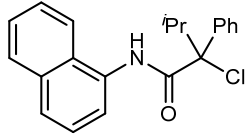

**E68**

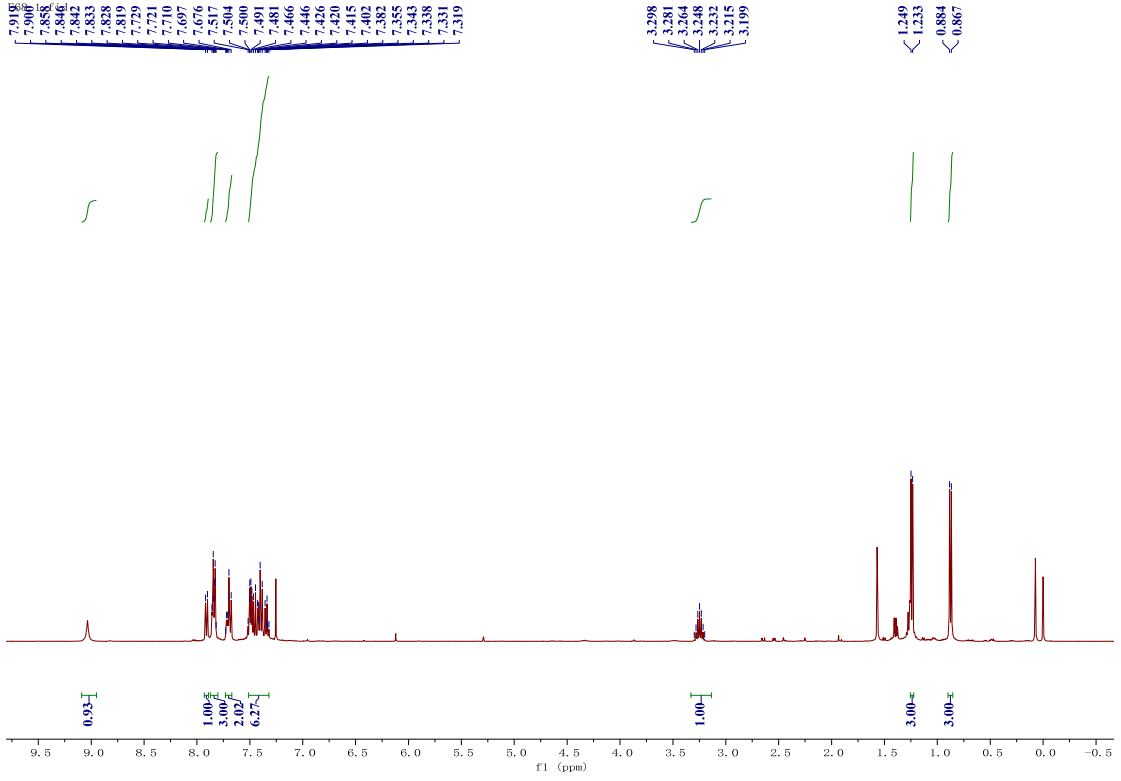

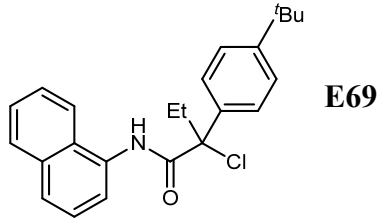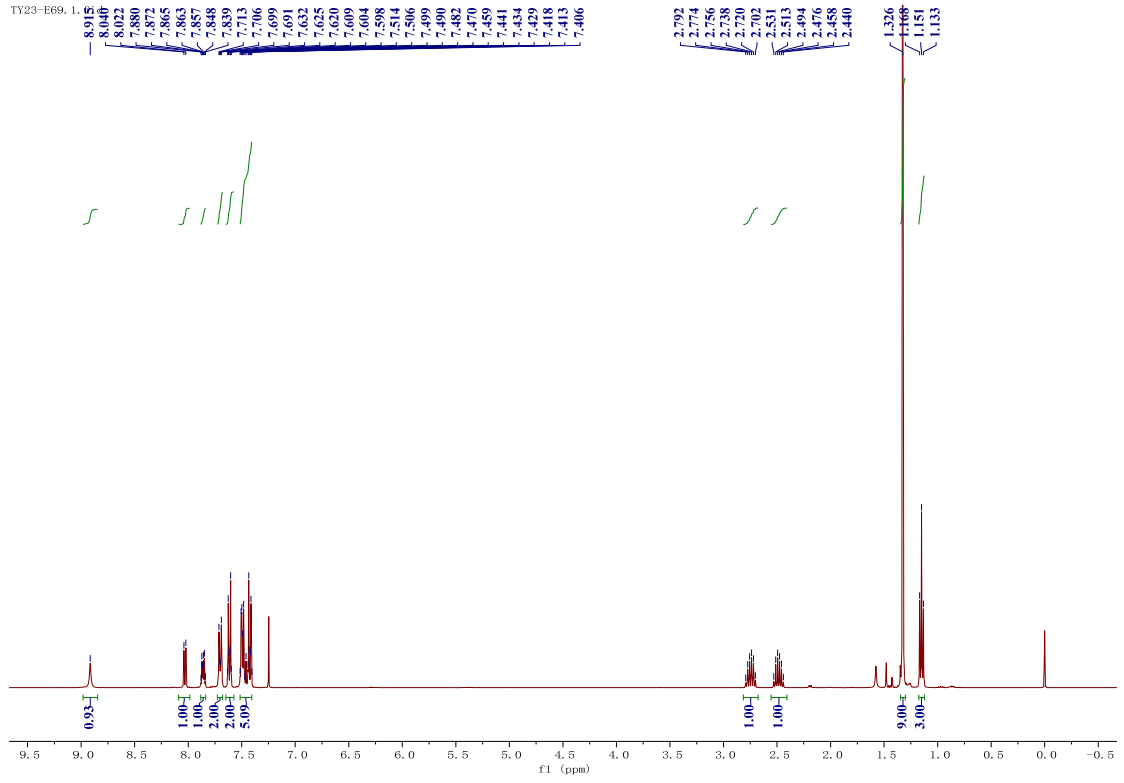

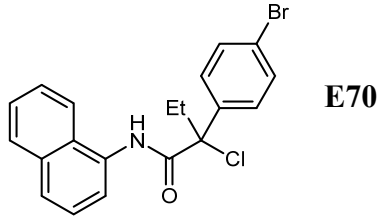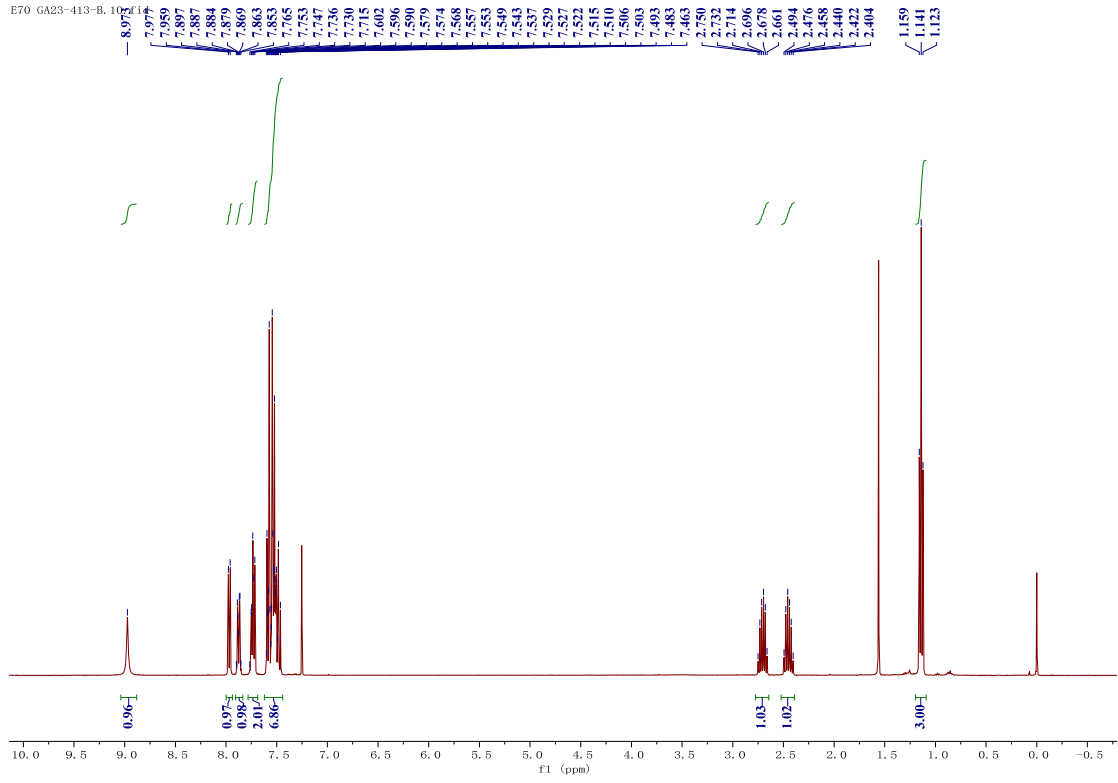

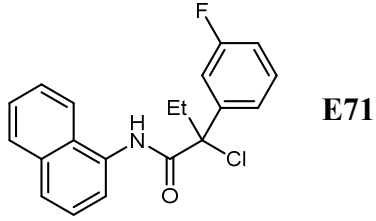

TY23-E71.1.fid

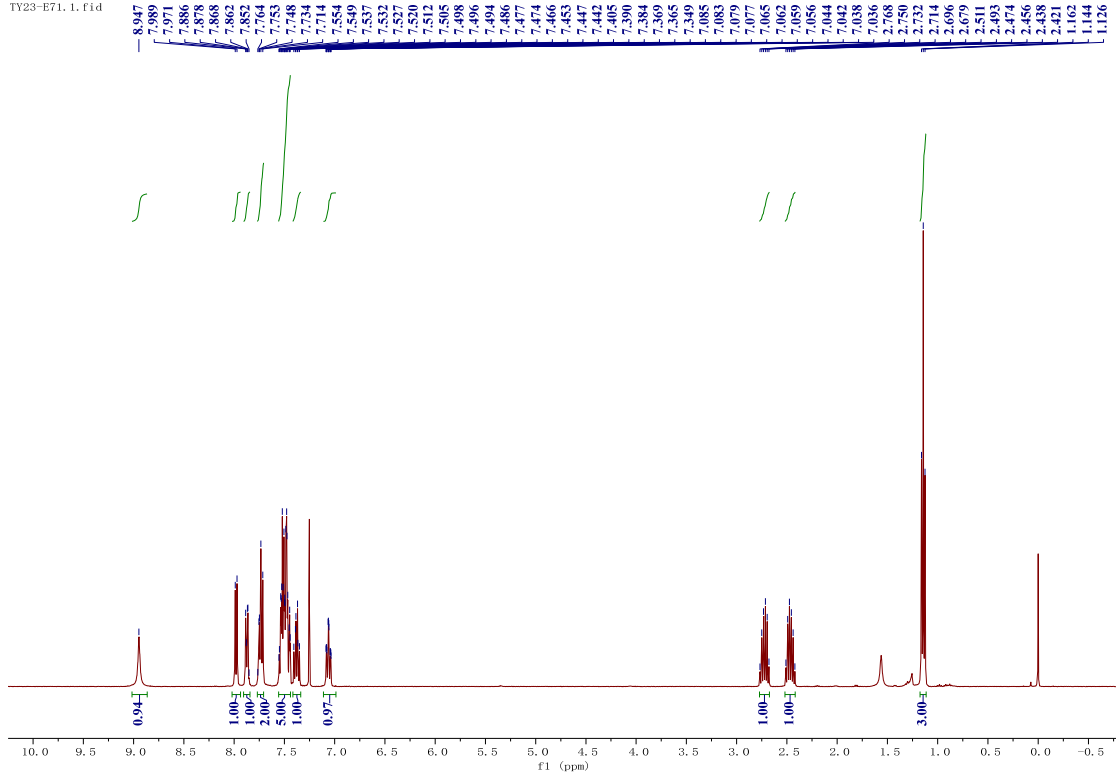

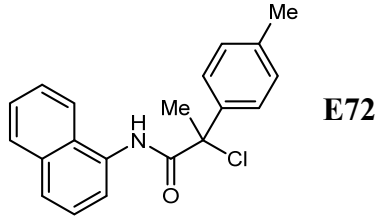

E72.1.fid

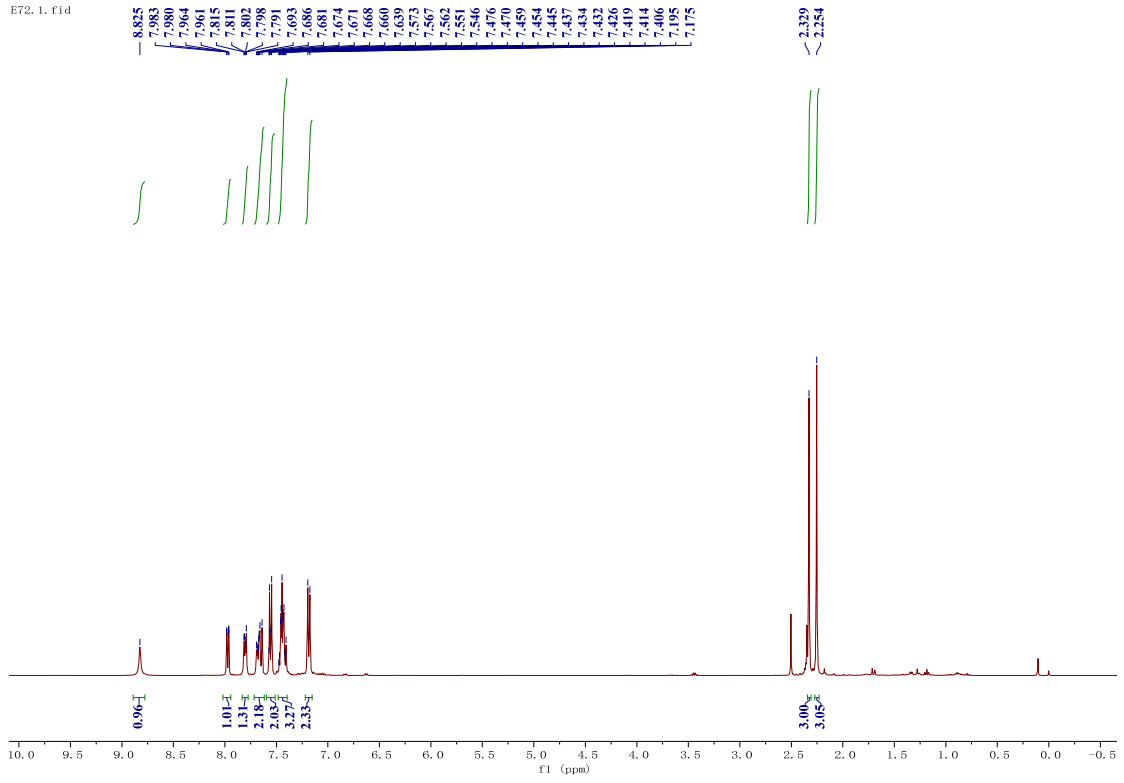

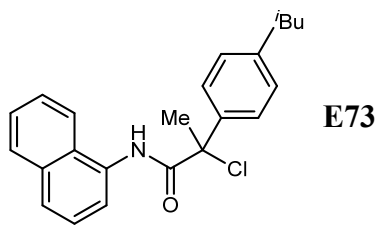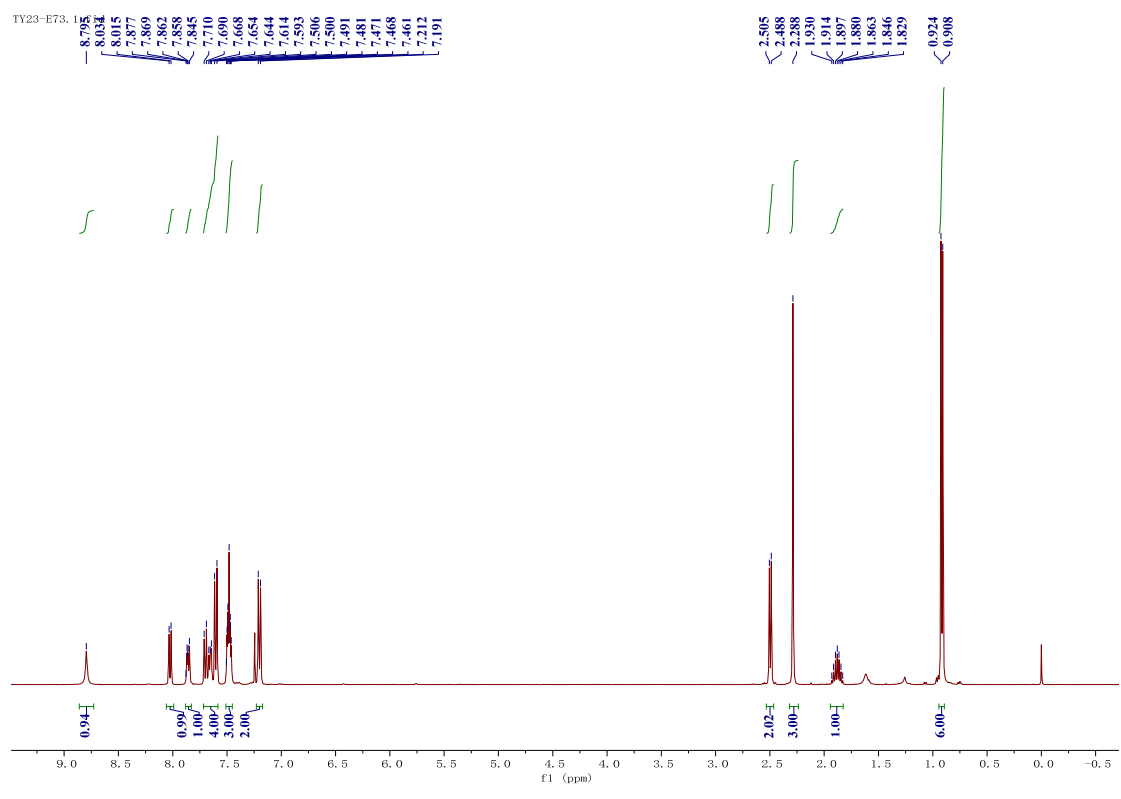

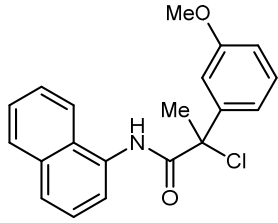

**E74**

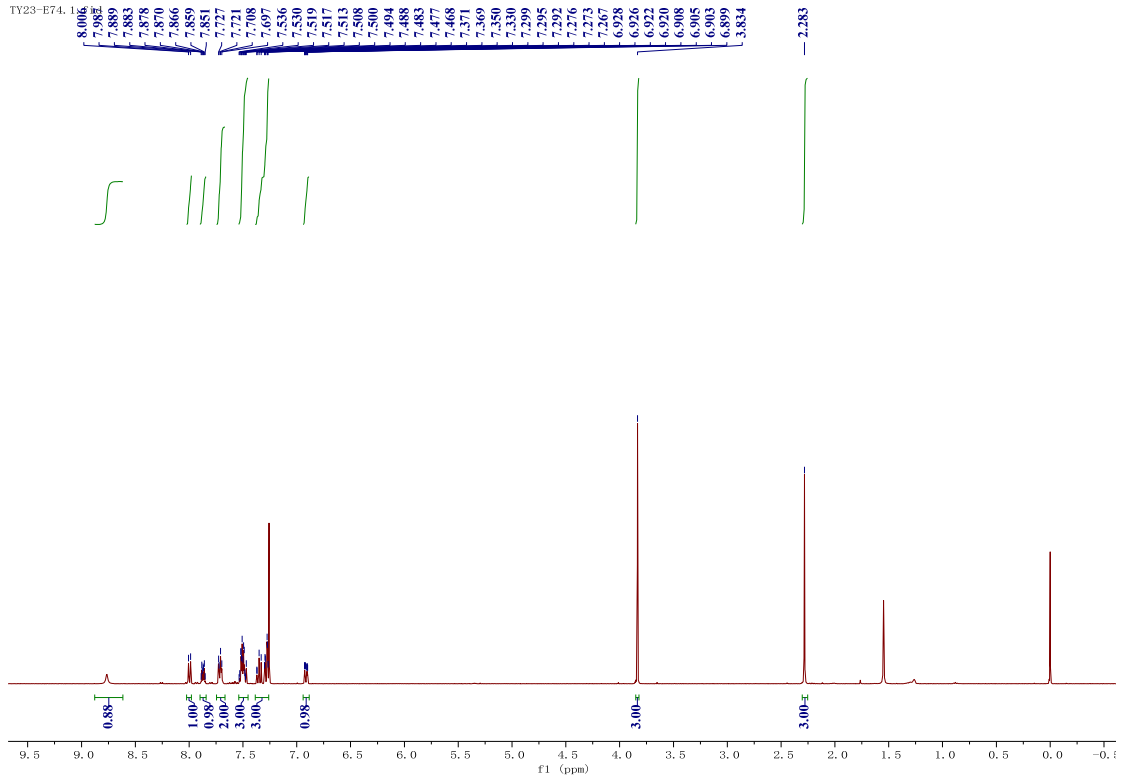



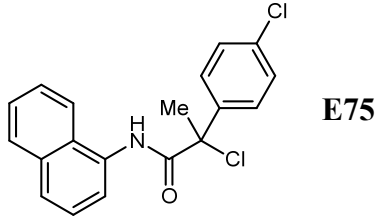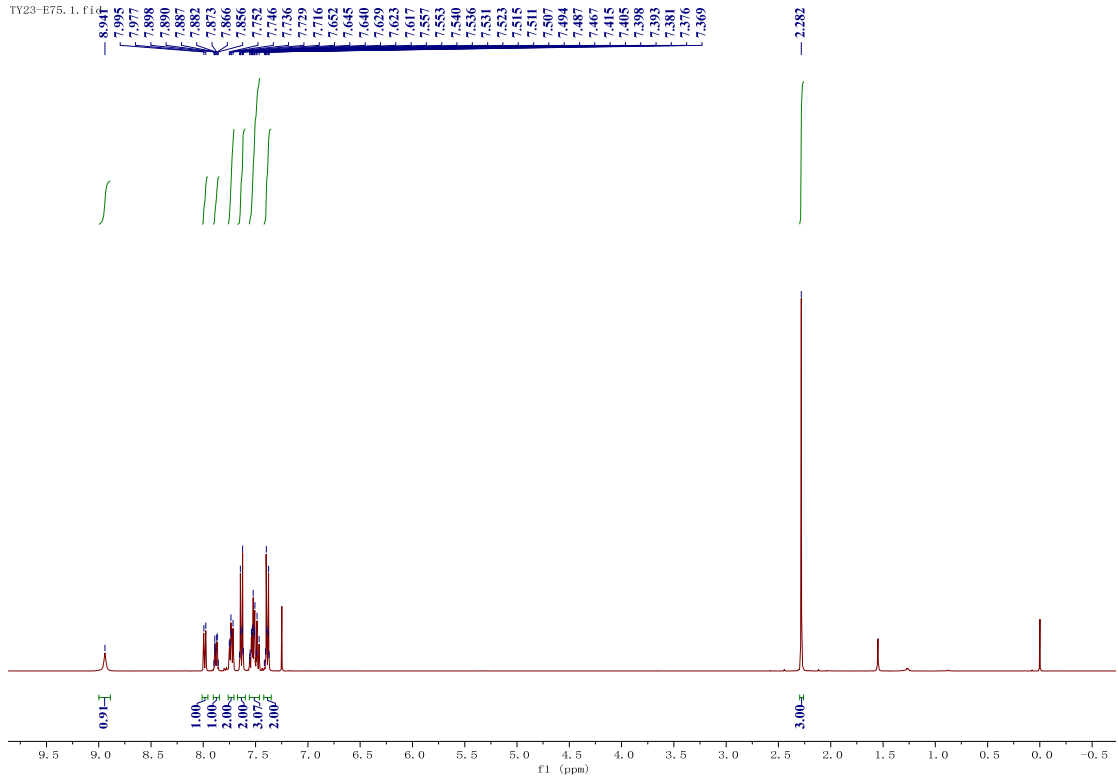

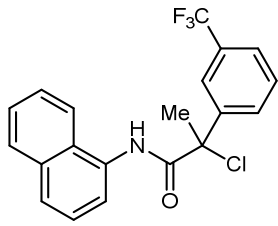

**E76**

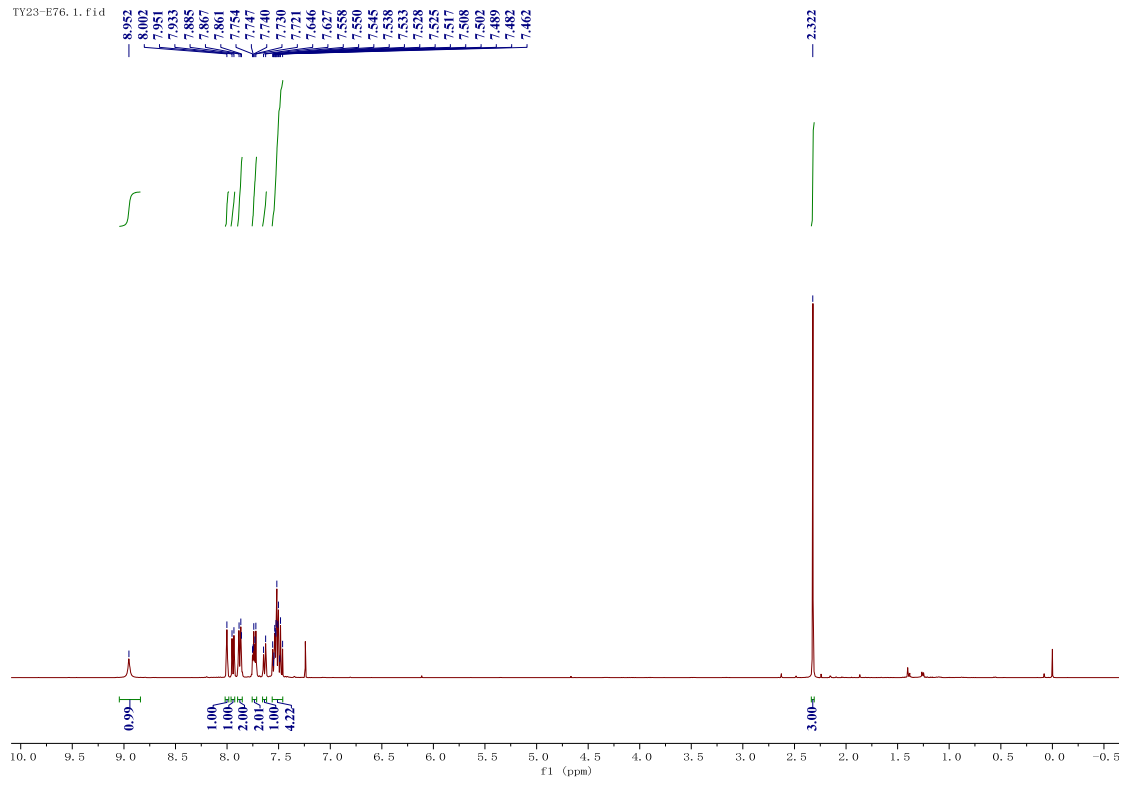

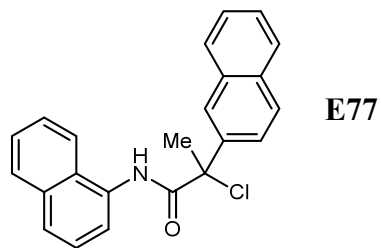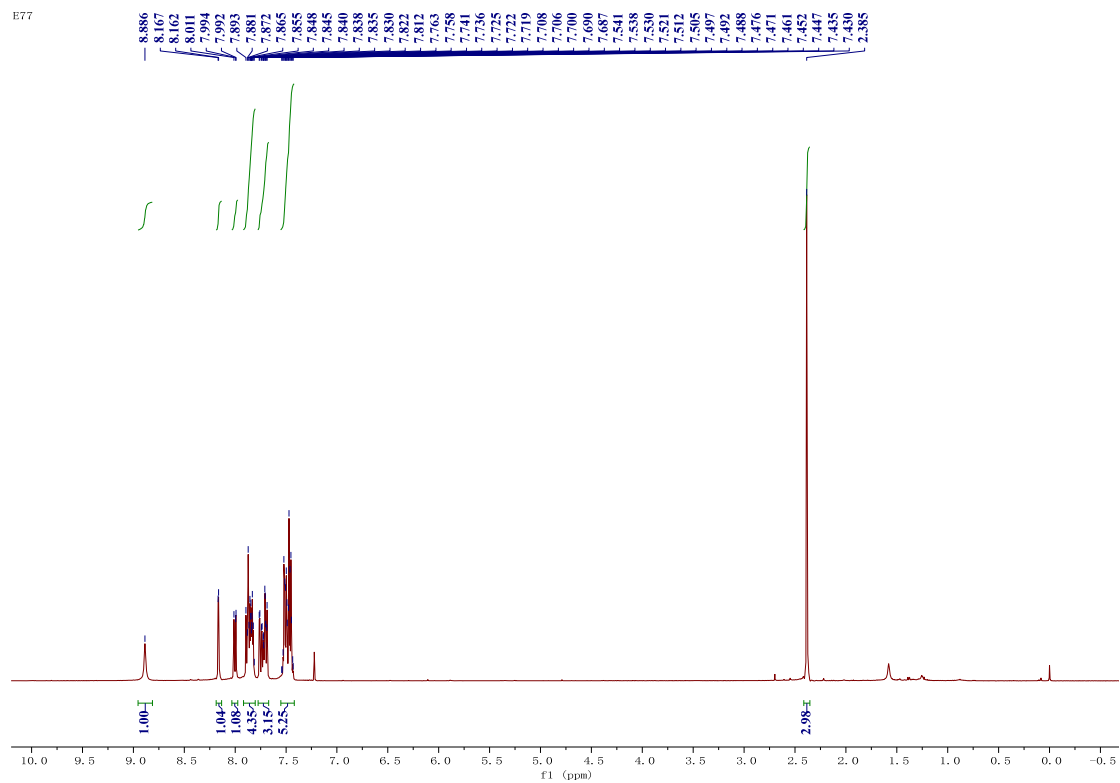

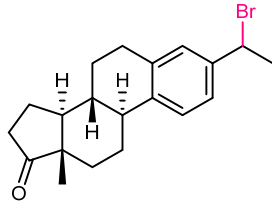

**E79**

ty23-7-64-1229PD, 1.f1

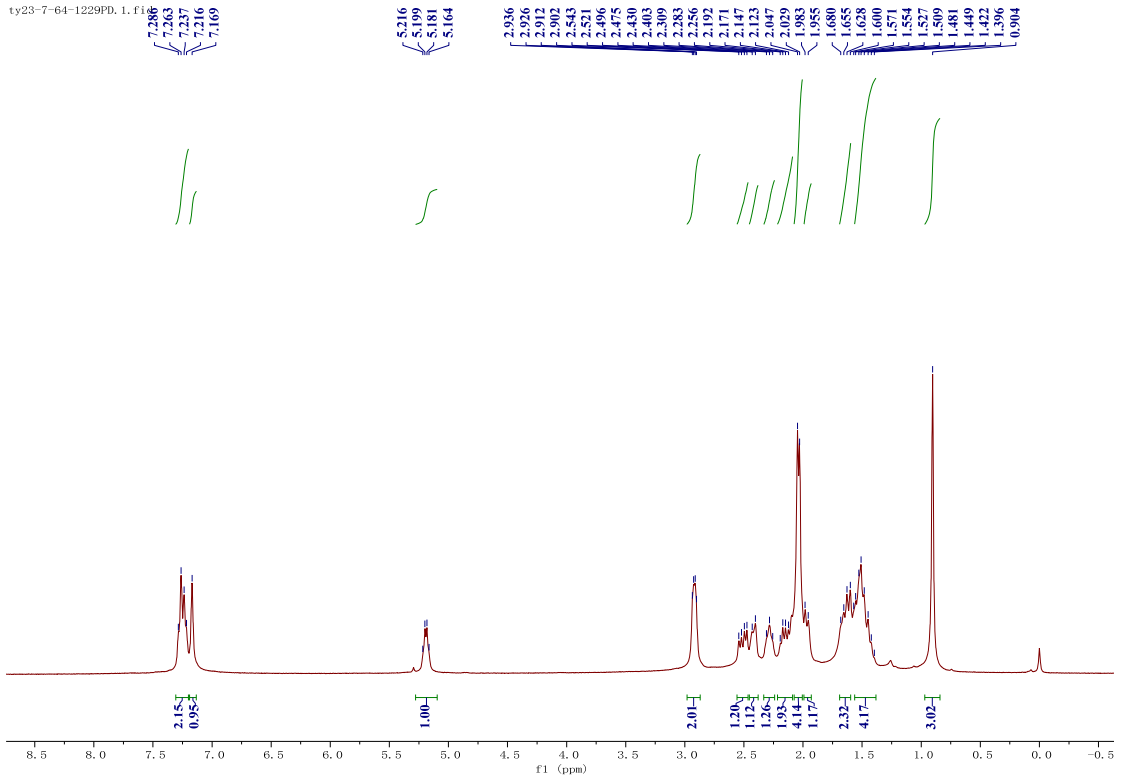

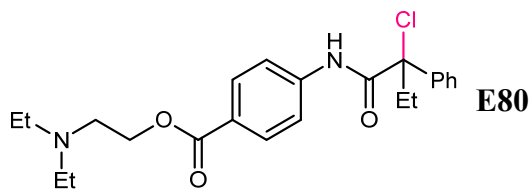

ty23-7-70-1235PC

8.658  
8.008  
8.007  
7.996  
7.984  
7.979  
7.959  
7.676  
7.671  
7.659  
7.654  
7.599  
7.595  
7.589  
7.581  
7.577  
7.574  
7.567  
7.551  
7.403  
7.399  
7.394  
7.382  
7.376  
7.366  
7.362  
7.354  
7.351  
7.347  
7.347  
7.344  
7.341  
7.336  
7.330  
7.322  
7.315  
4.744  
4.730  
4.716  
3.390  
3.377  
3.363  
3.179  
3.161  
3.143  
3.125  
2.677  
2.659  
2.641  
2.623  
2.605  
2.588  
2.465  
2.447  
2.428  
2.410  
2.394  
2.372  
1.366  
1.356  
1.331  
1.061  
1.043  
1.025

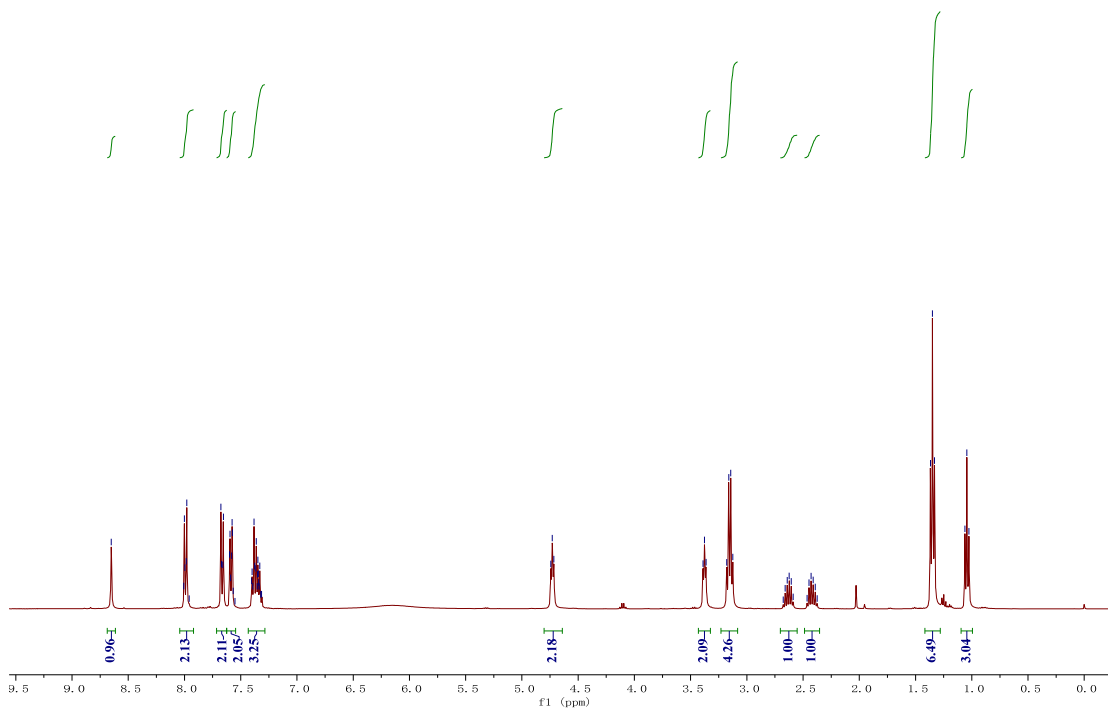

ty23-7-70-1235PC, 13, f1

168.408  
165.221  
141.837  
139.613  
130.815  
128.568  
128.540  
126.173  
124.931  
119.294  
78.958  
59.502  
49.880  
47.362  
34.780  
9.291  
9.134

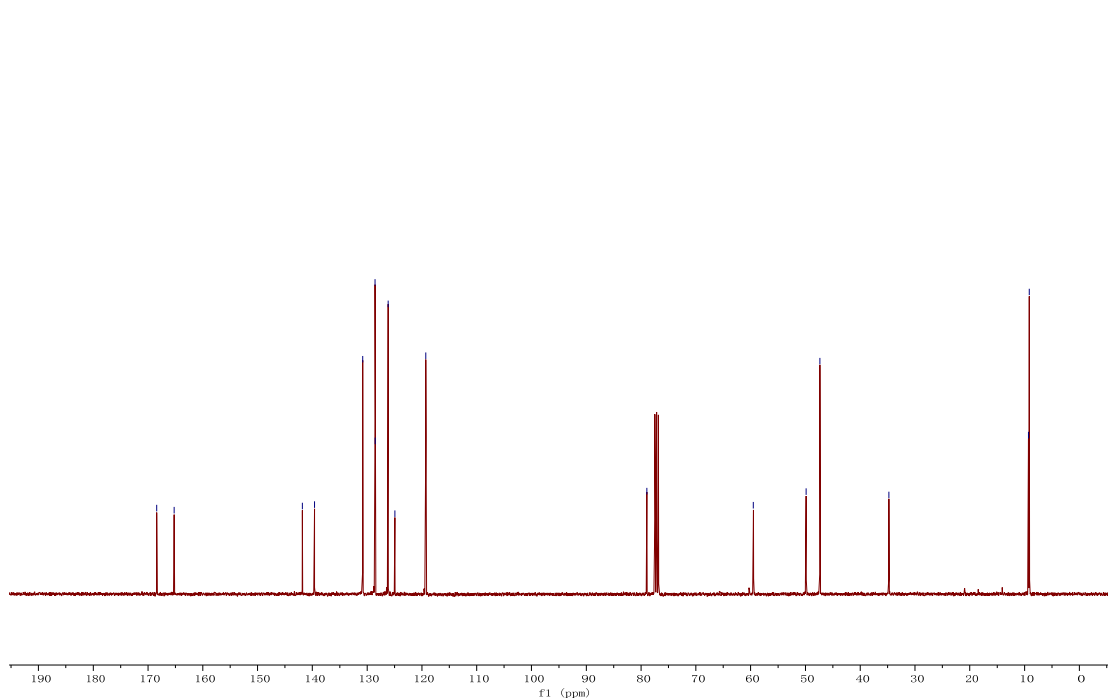

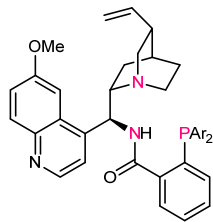

**L\*1**

Ar = 3,5-(tBu)<sub>2</sub>C<sub>6</sub>H<sub>3</sub>

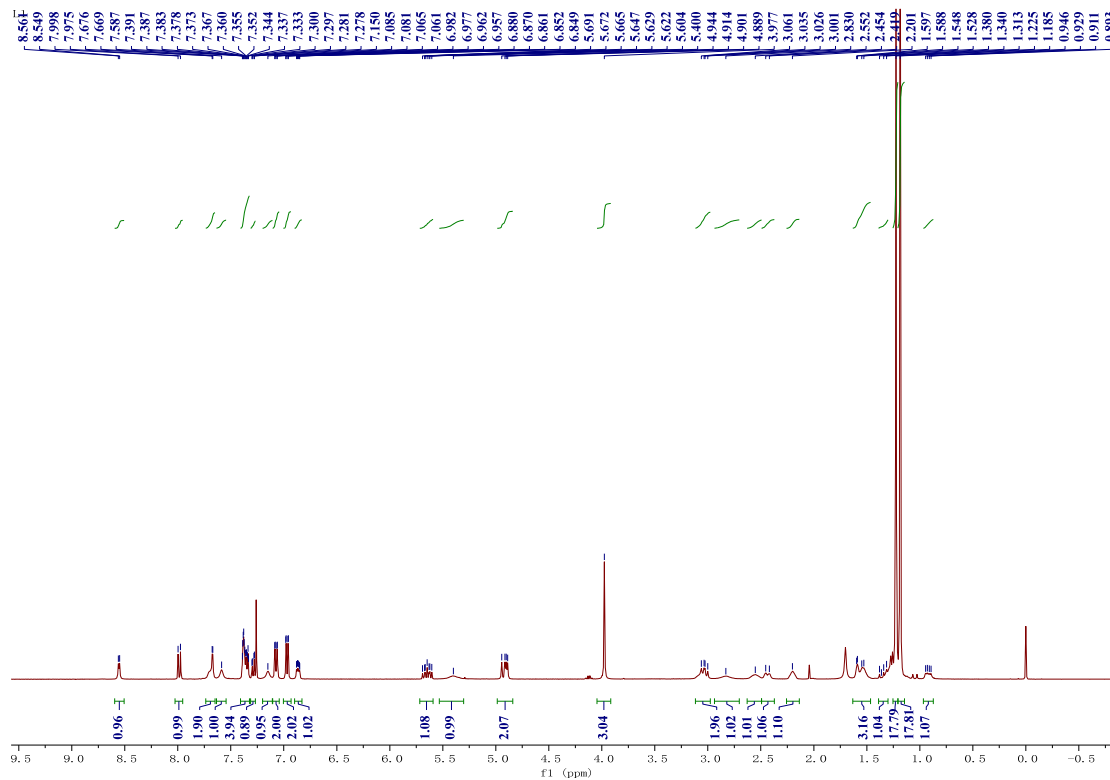

ty23-L1\_31.fid

-8.741

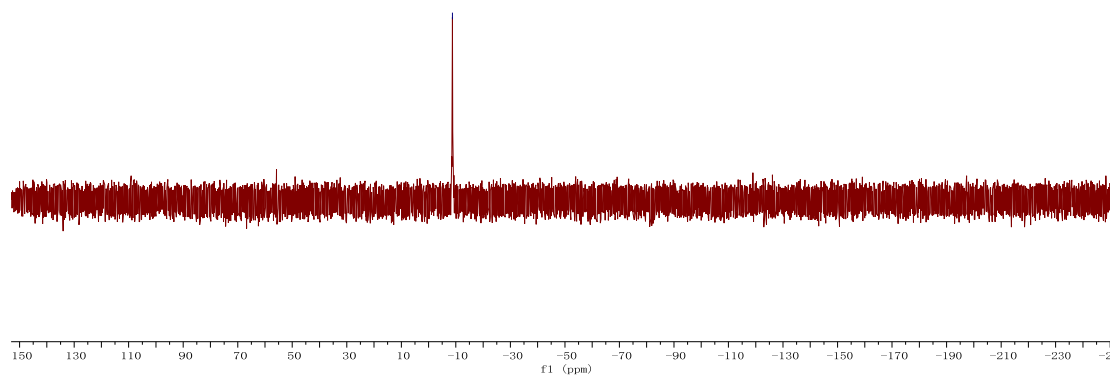

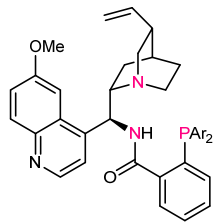

L\*2

Ar = 2-MeC<sub>6</sub>H<sub>4</sub>

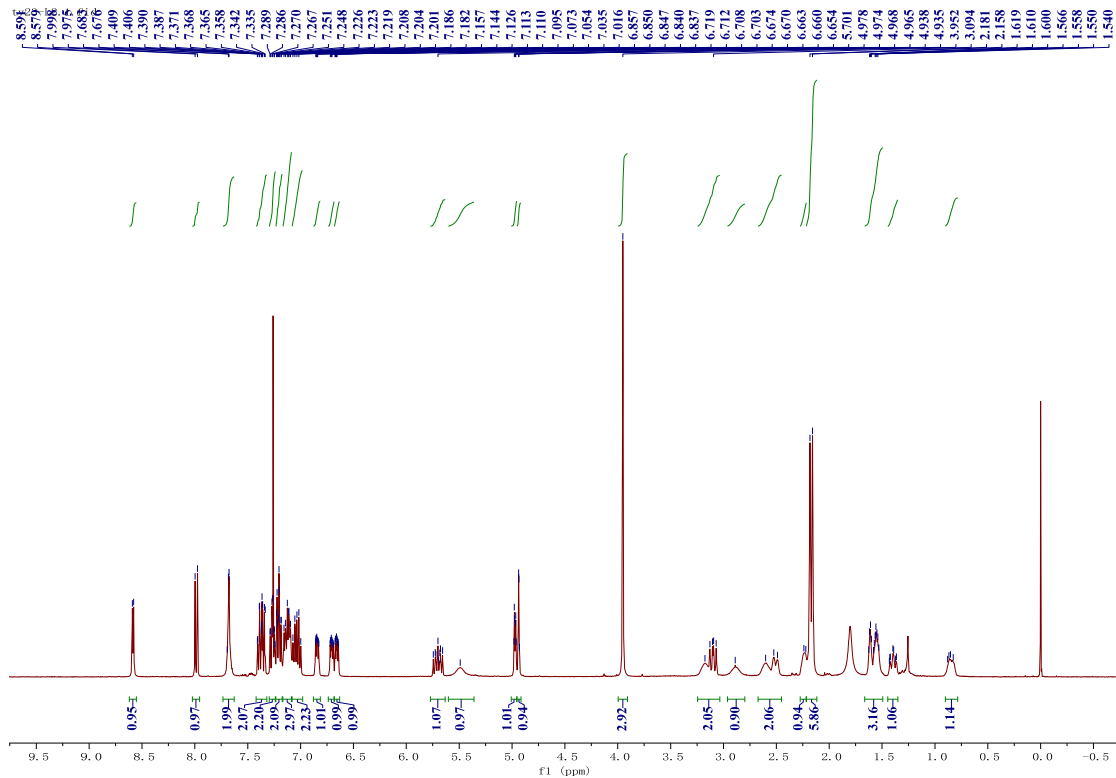

ty23-L2.31.fid

-26.321

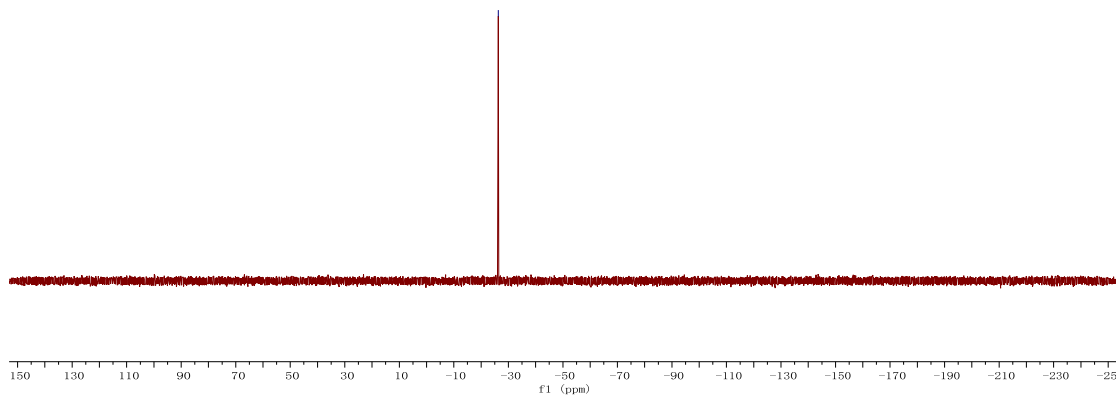

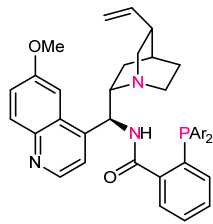

**L\*3**

Ar = 3-OMeC<sub>6</sub>H<sub>4</sub>

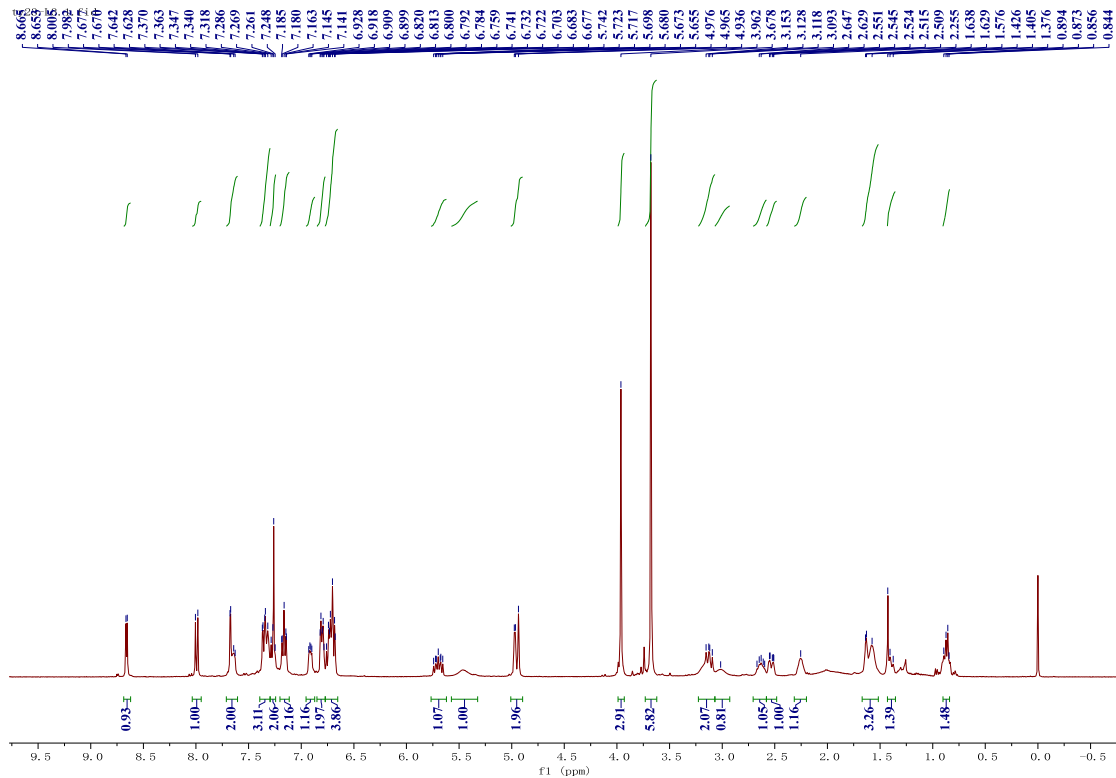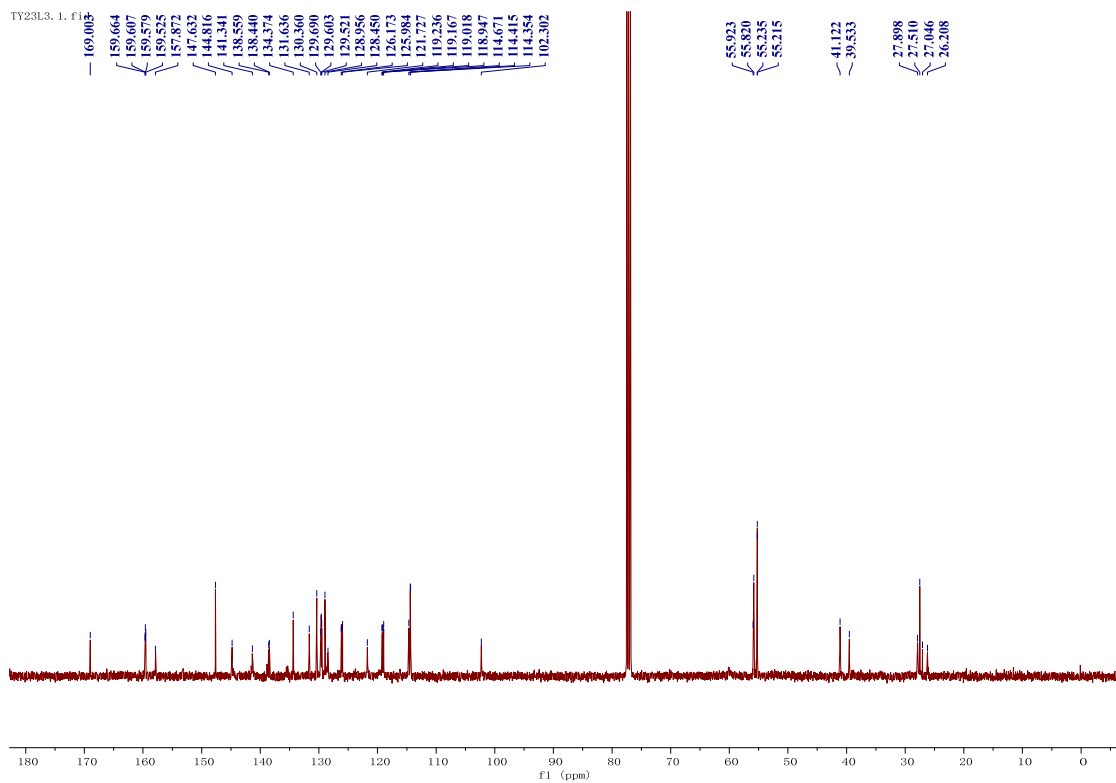



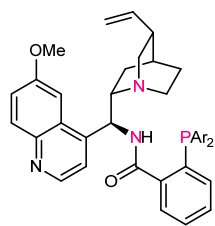

**L\*3**

ty23-L3, 31. fid

— 9.105

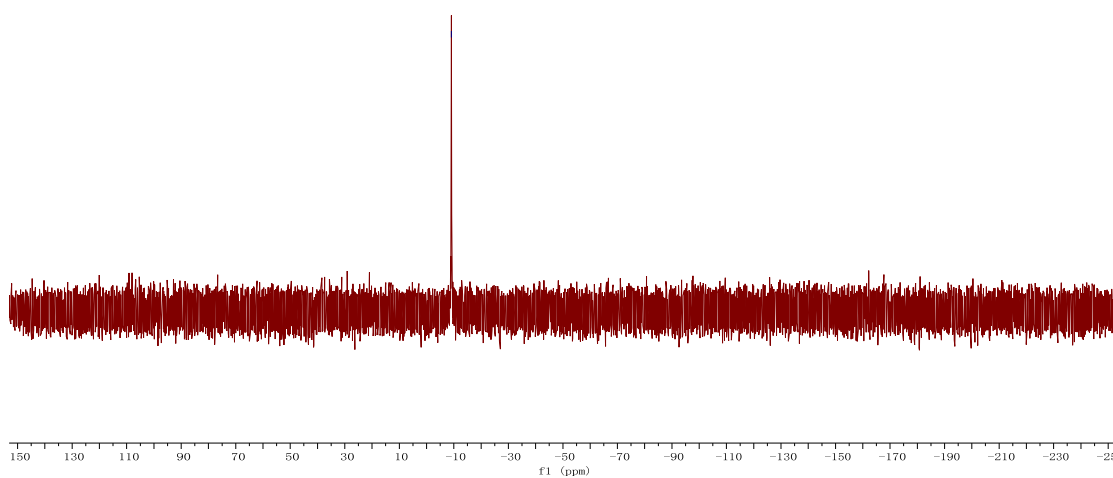

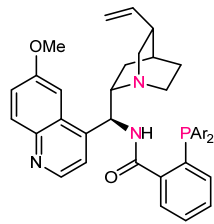

L\*4

Ar = 4-PhC<sub>6</sub>H<sub>4</sub>

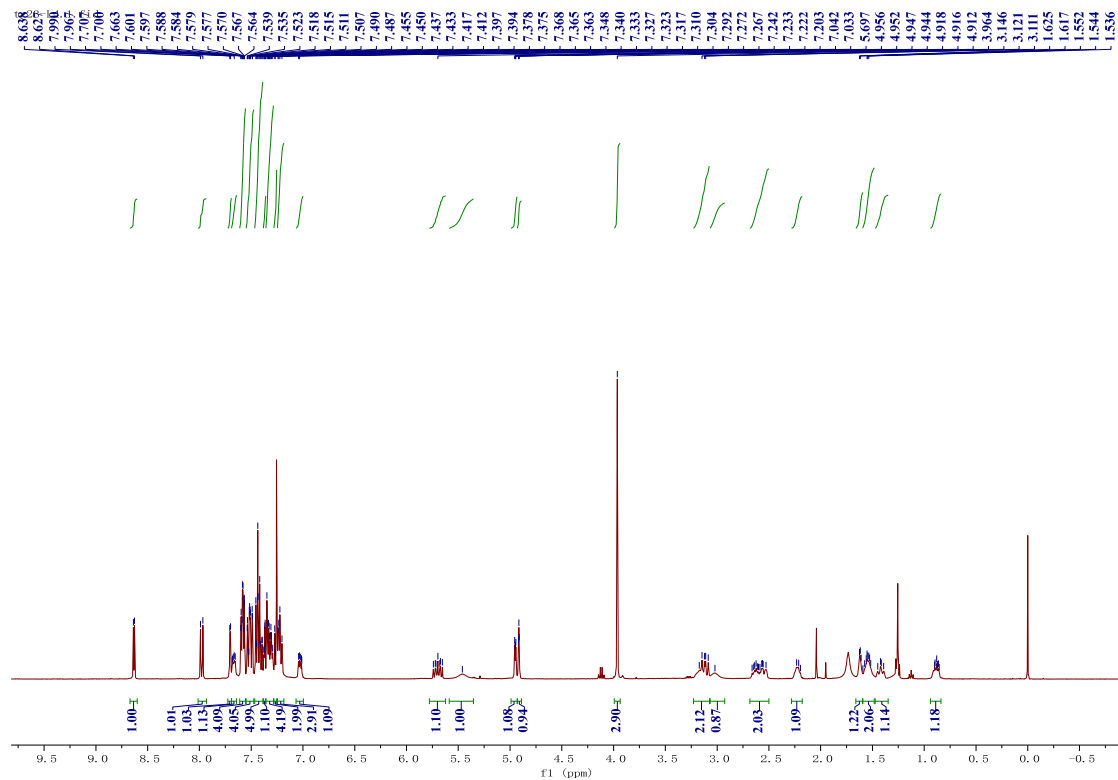

ty23-L4.31.fid

-- 12.321

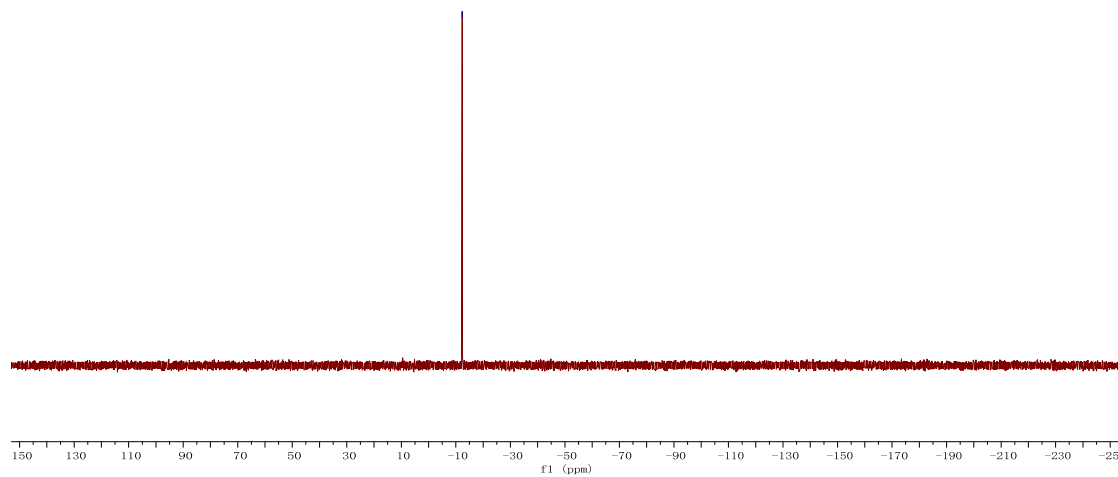

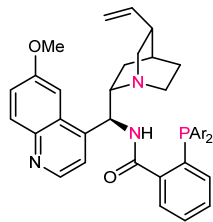

**L\*5**

Ar = 3,5-(Pr)<sub>2</sub>C<sub>6</sub>H<sub>3</sub>

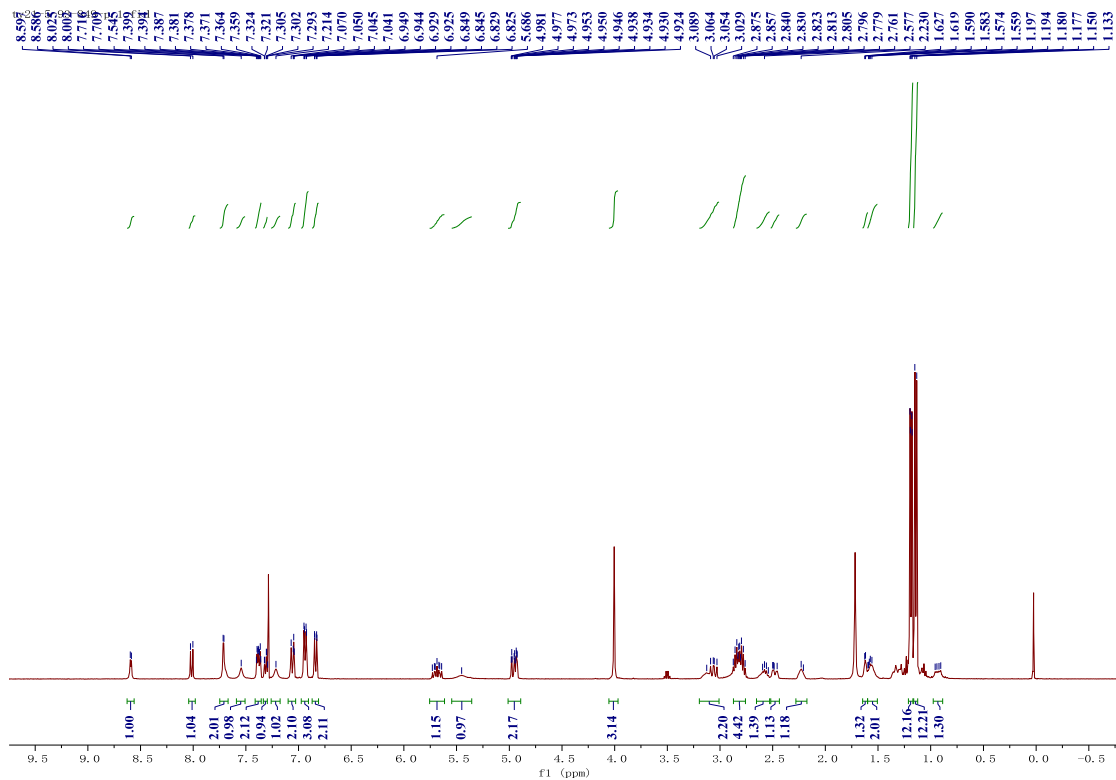

ty21-5-93-849-p.31.fid

-10.061

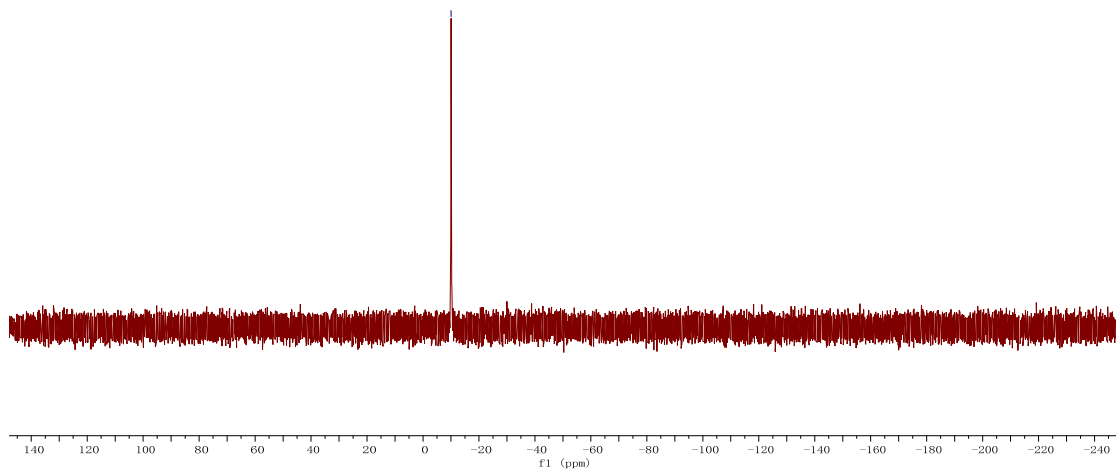

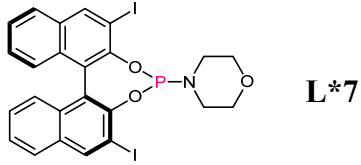

ty23-L-7.1.fid

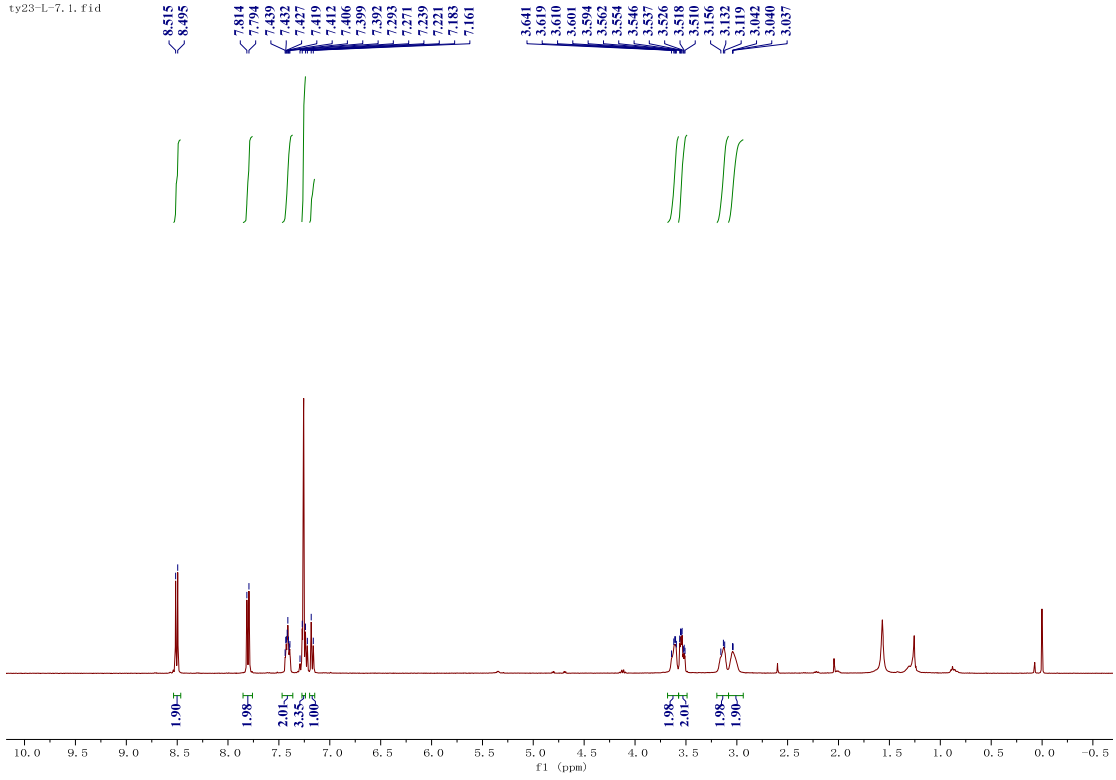

ty23-L-7.13.fid

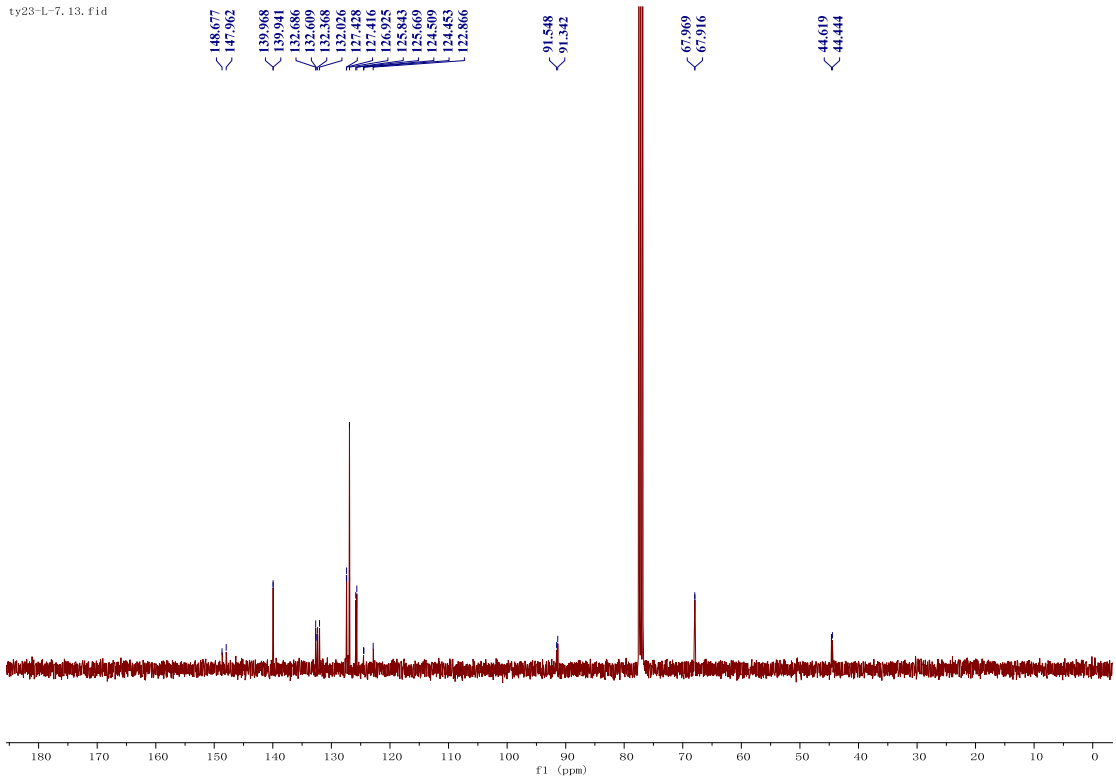

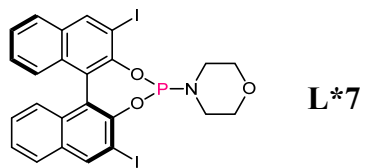

ty38-L-7.31.fid

143.743

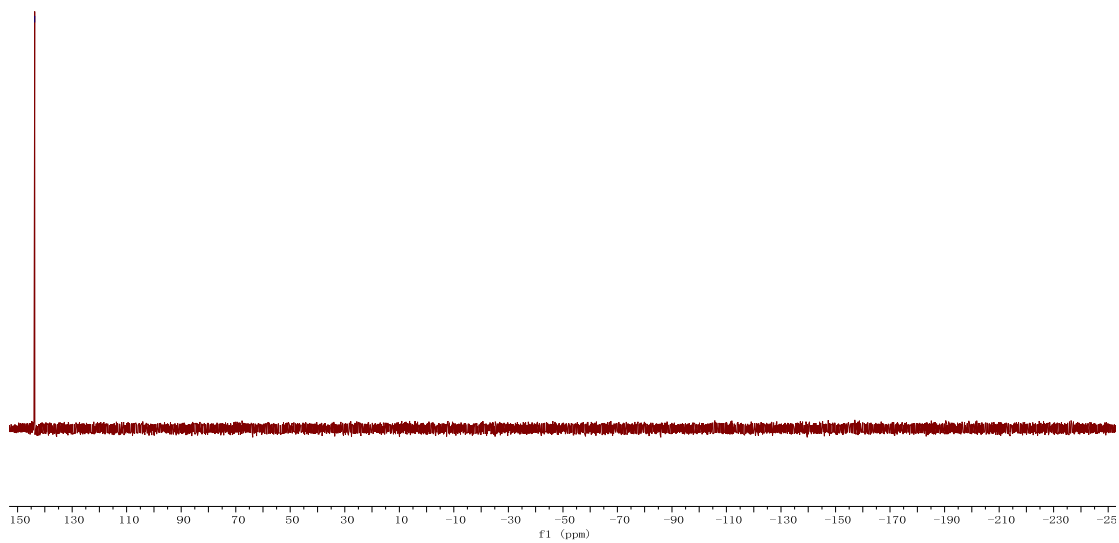

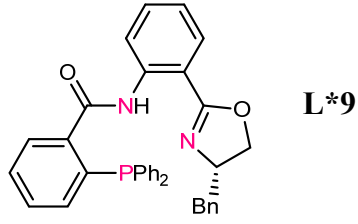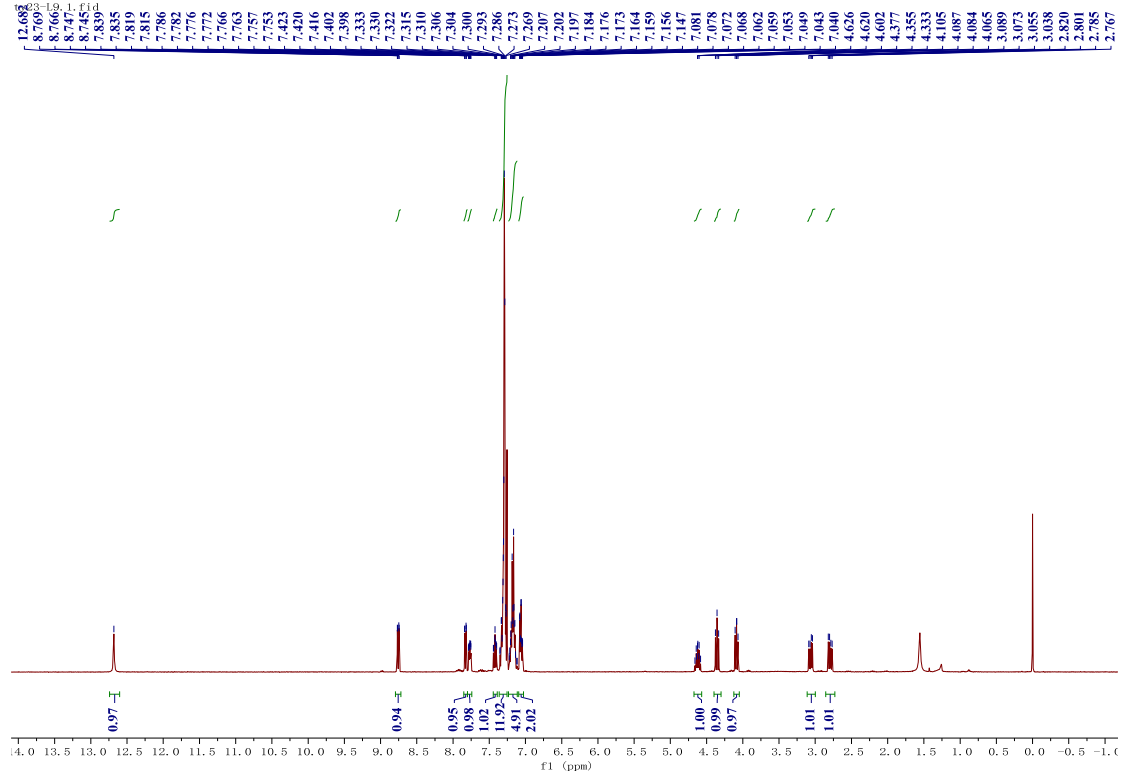

ty23-L9\_31.fid

-8.055

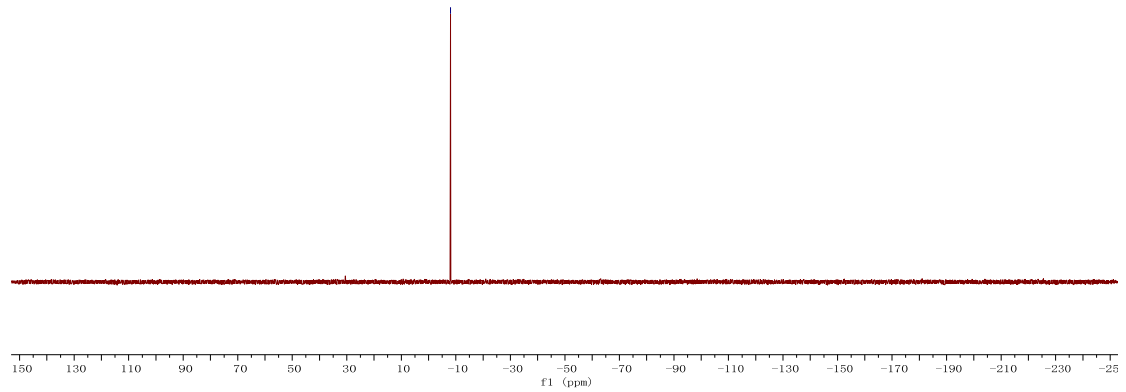

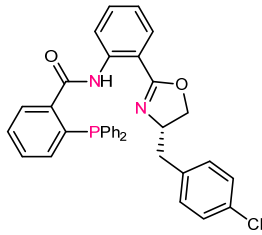

**L\*10**

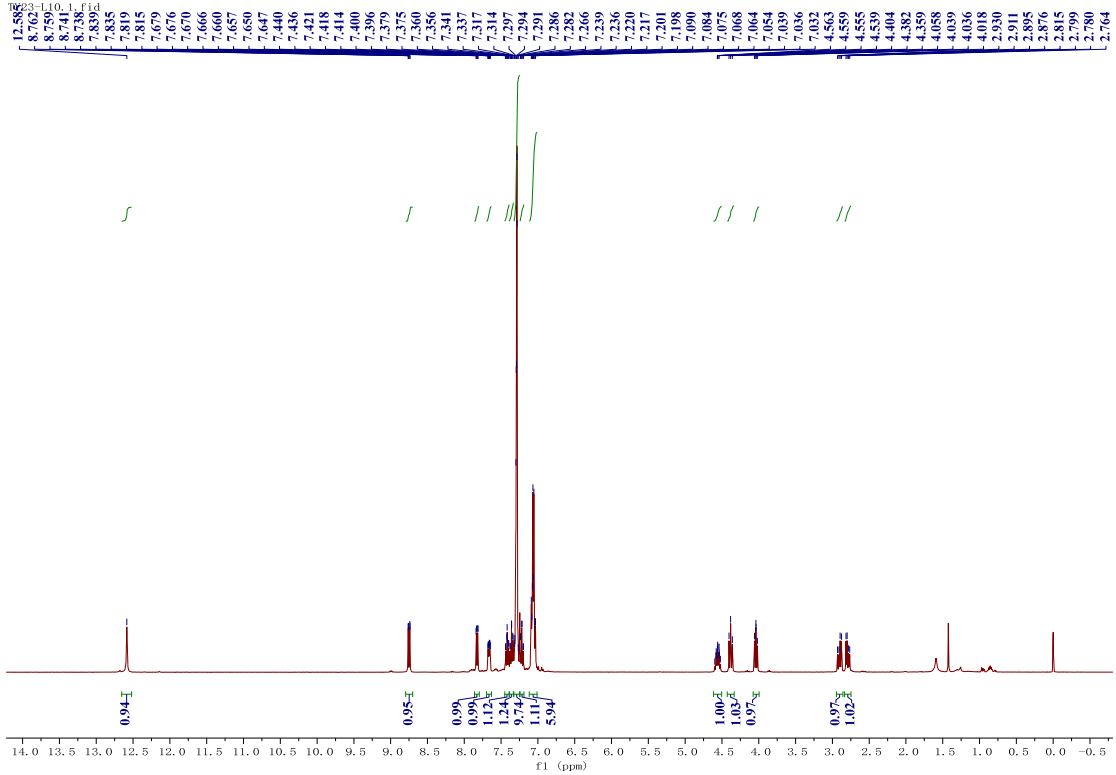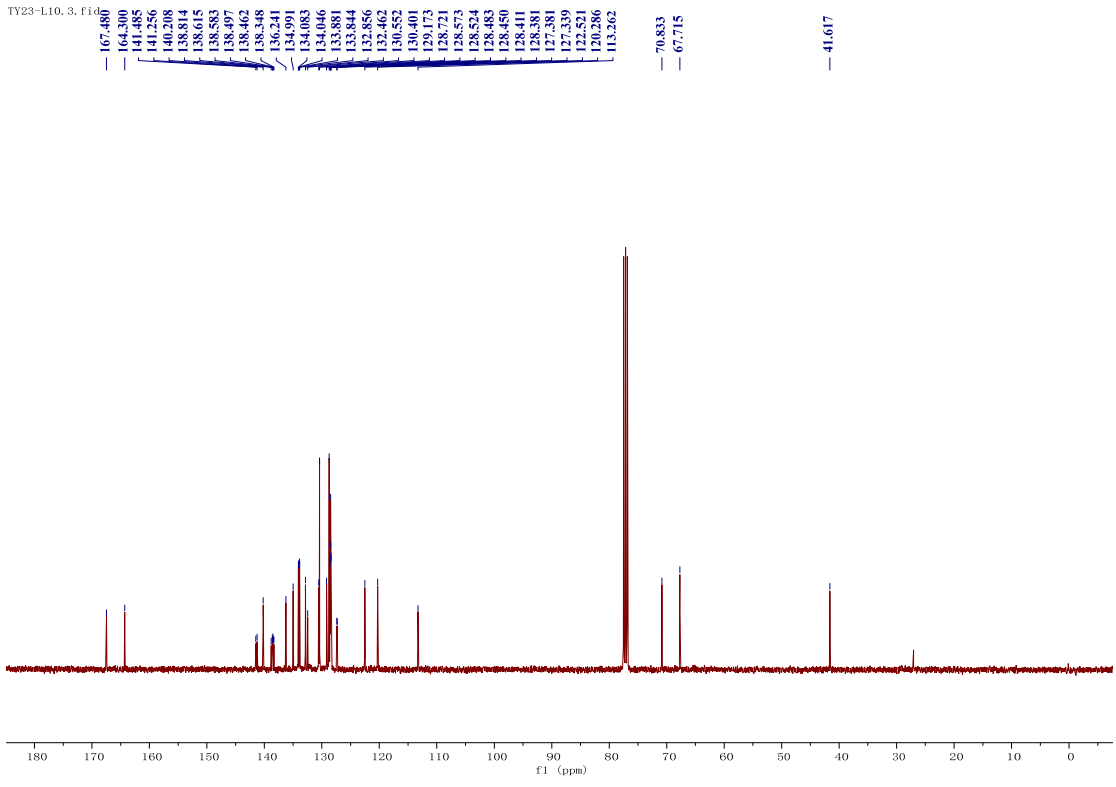

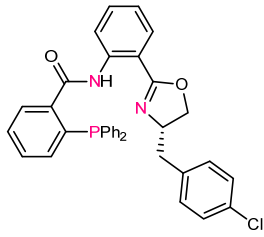

**L\*10**

TY23-L10.2.fid

-8.248

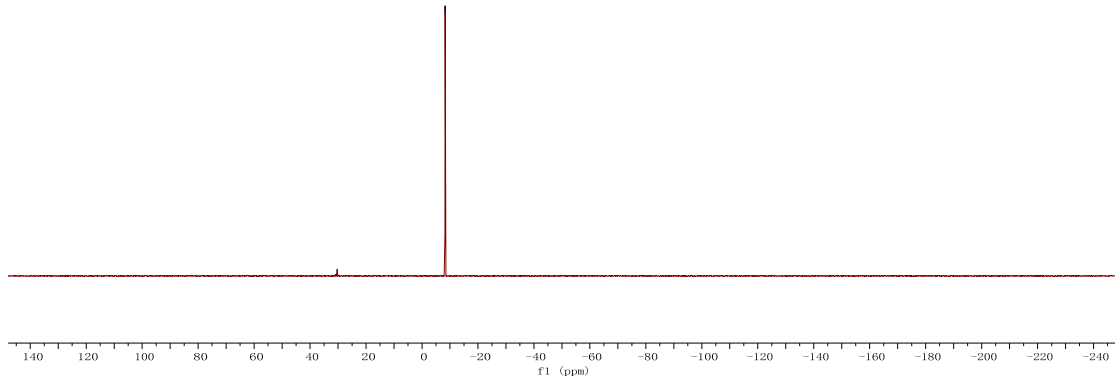



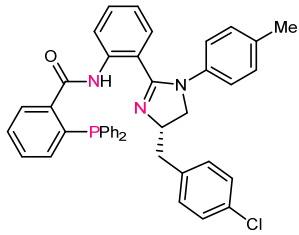

L\*11

TY23-L11. 1. f1d

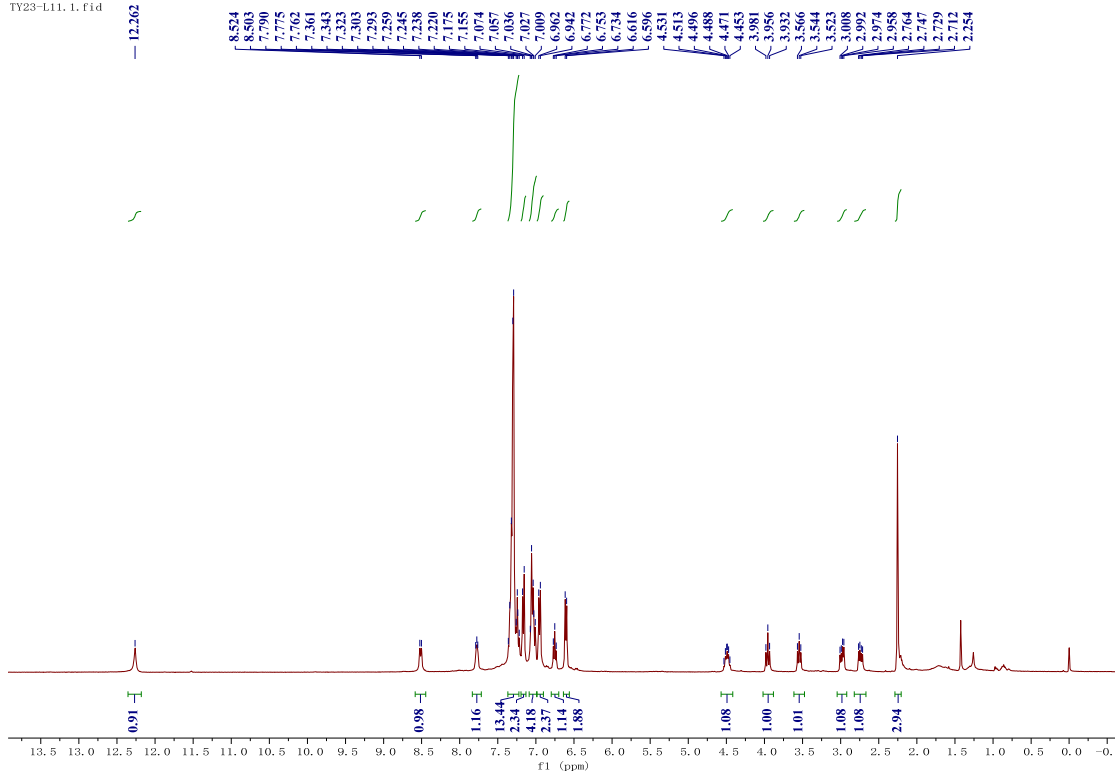

TY23-L11. 3. f1

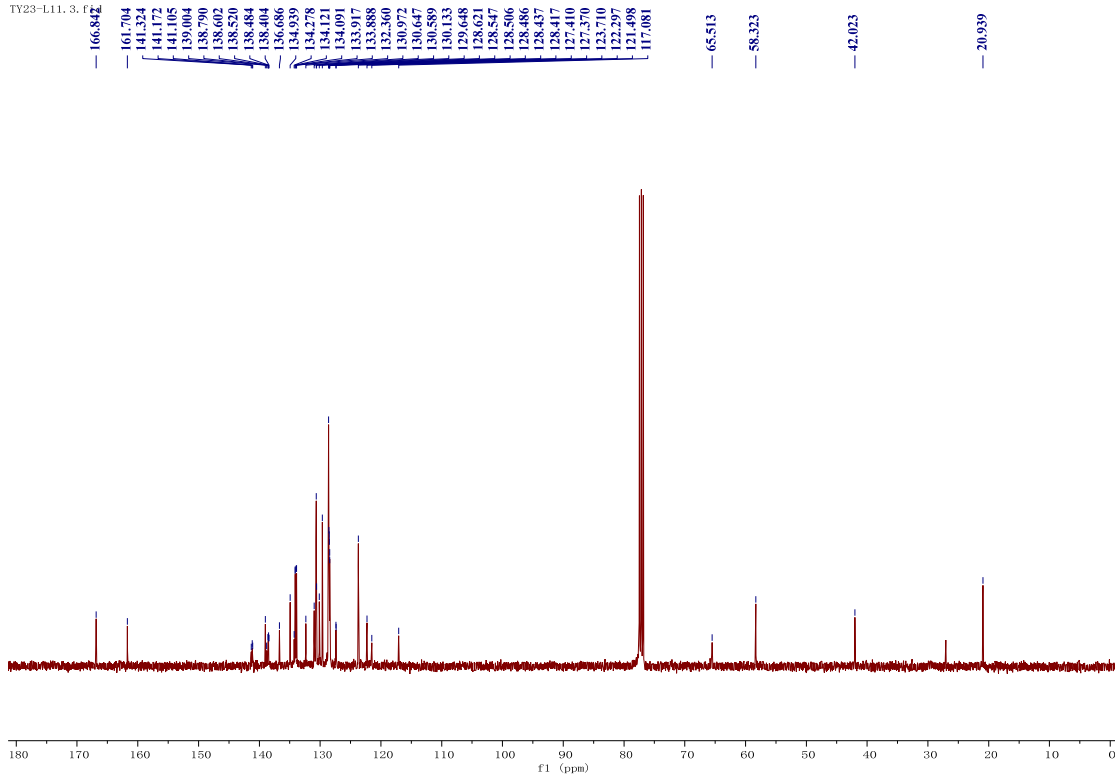

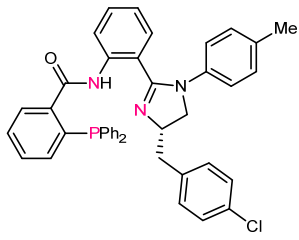

L\*11

TY23-L11.2.fid

-8.219

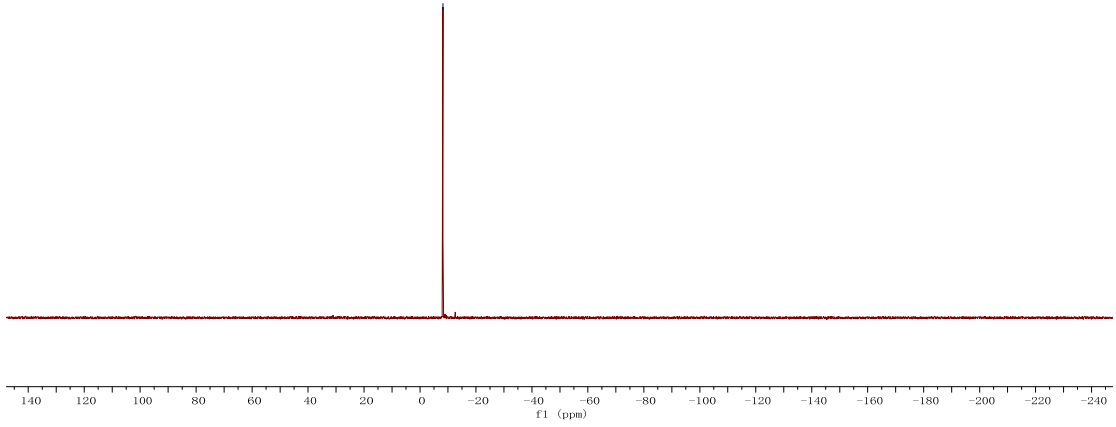

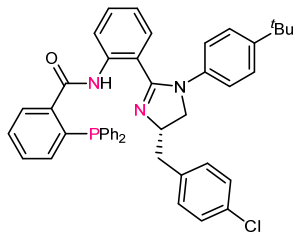

L\*12

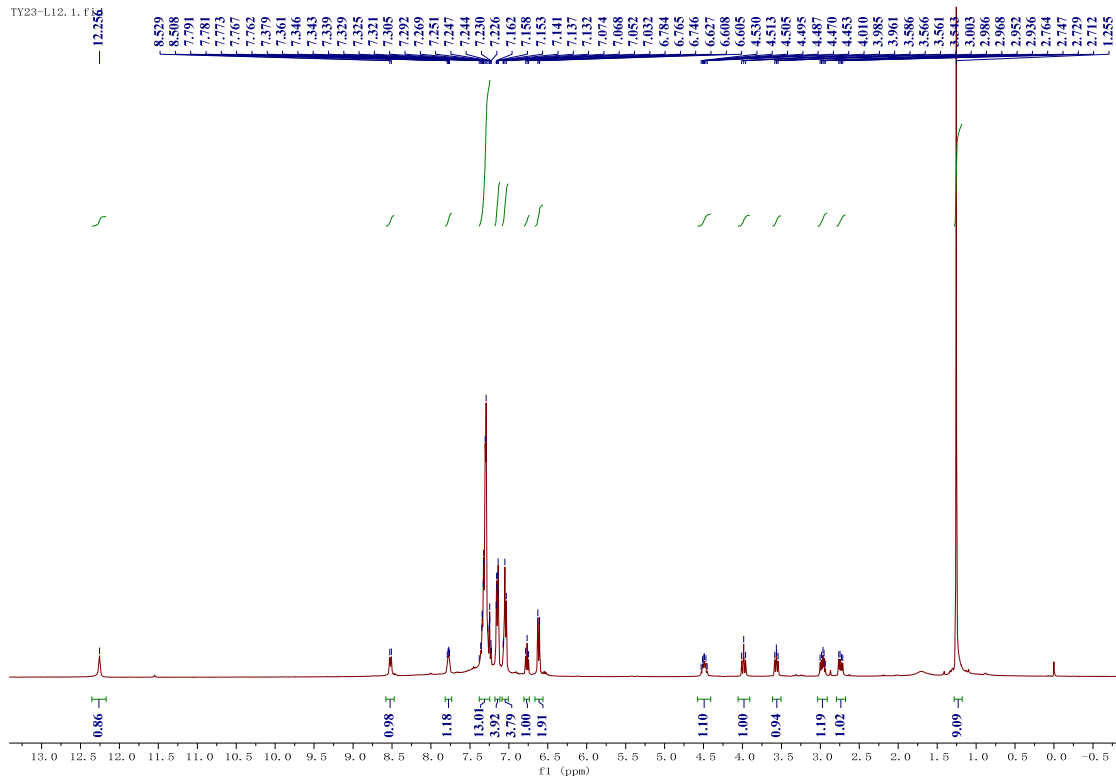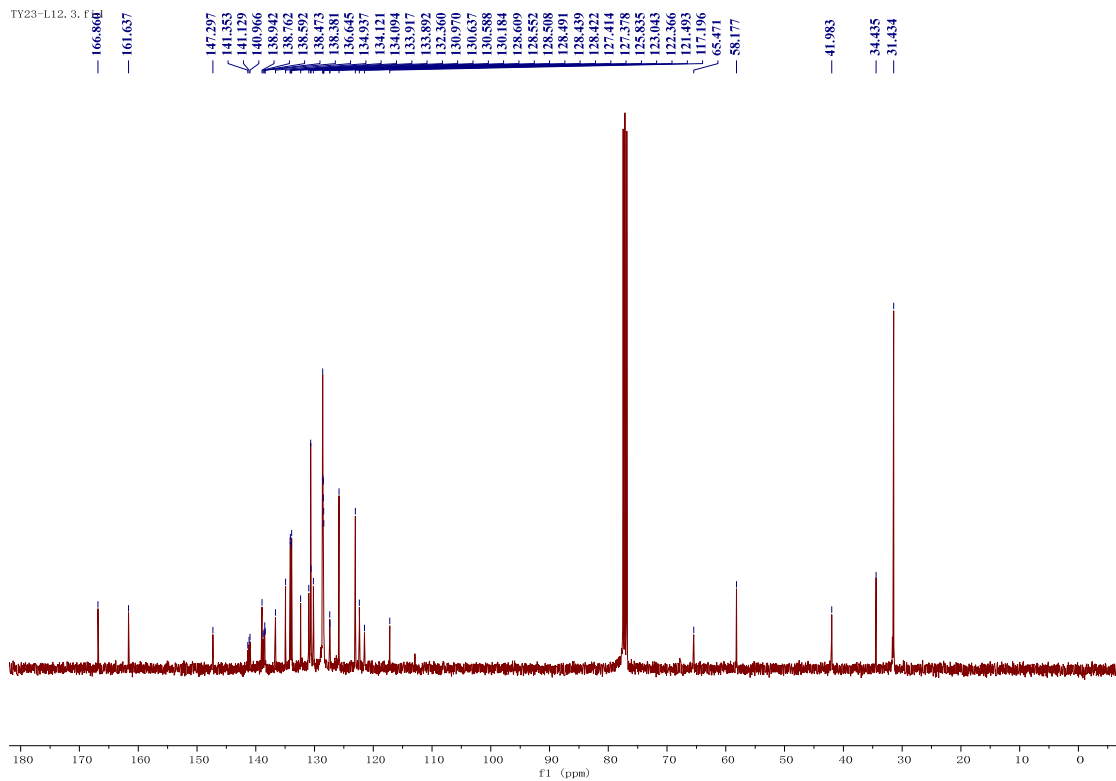

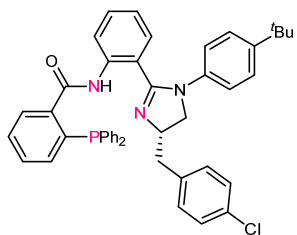

**L\*12**

TY23-L12.2.fid

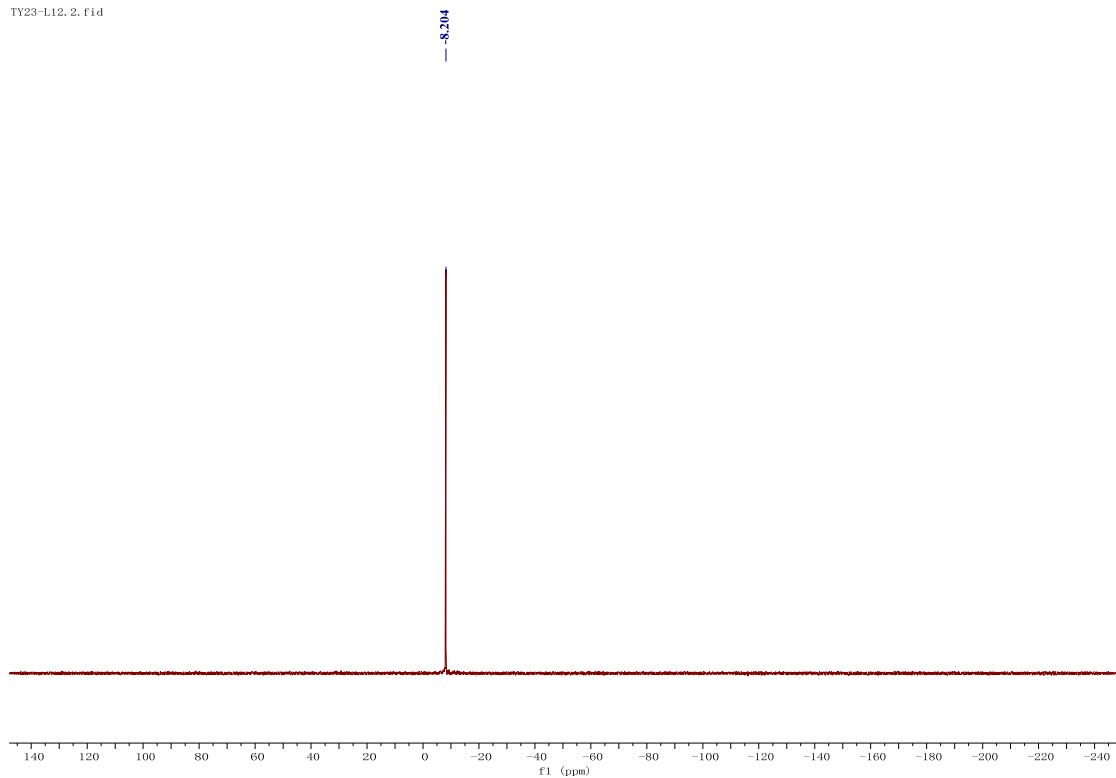

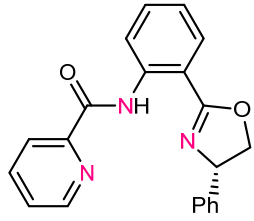

**L\*13**

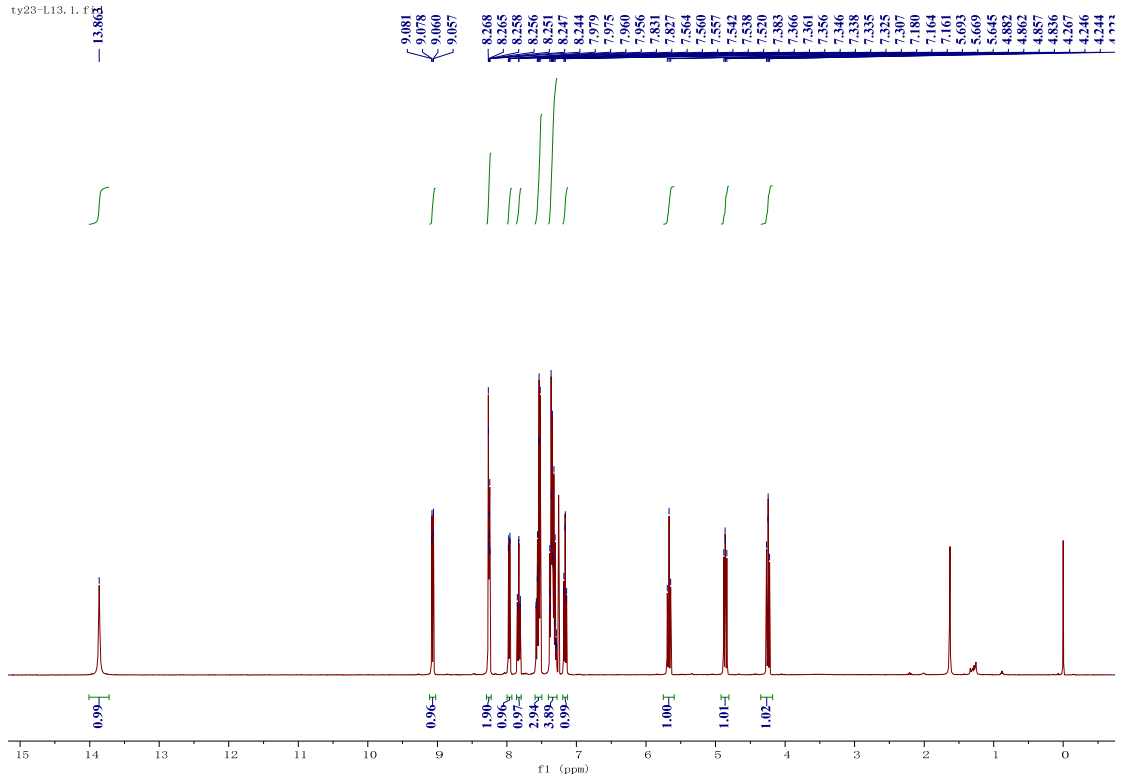

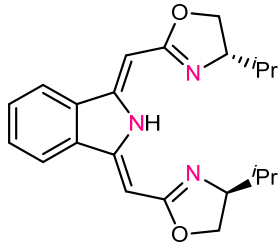

**L\*14**

ty23-L14.1.fid

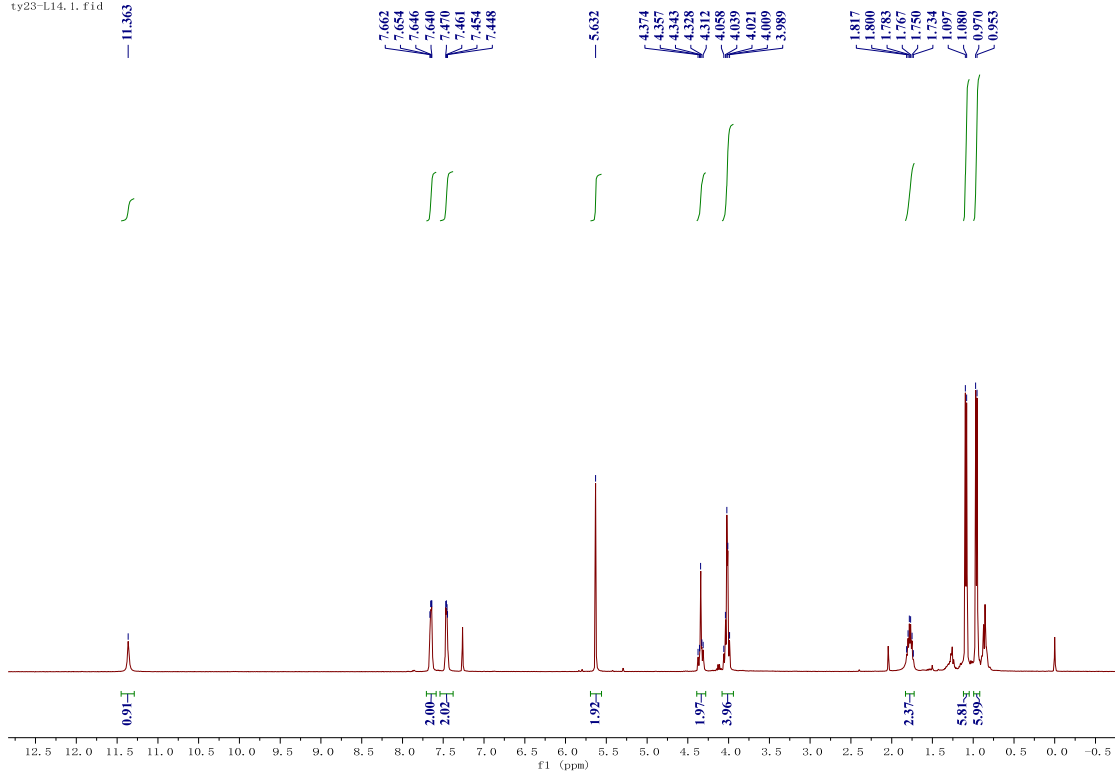

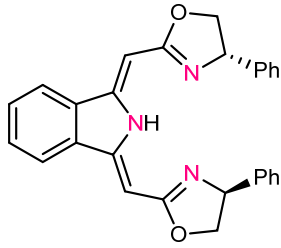

**L\*15**

L15\_10.fid

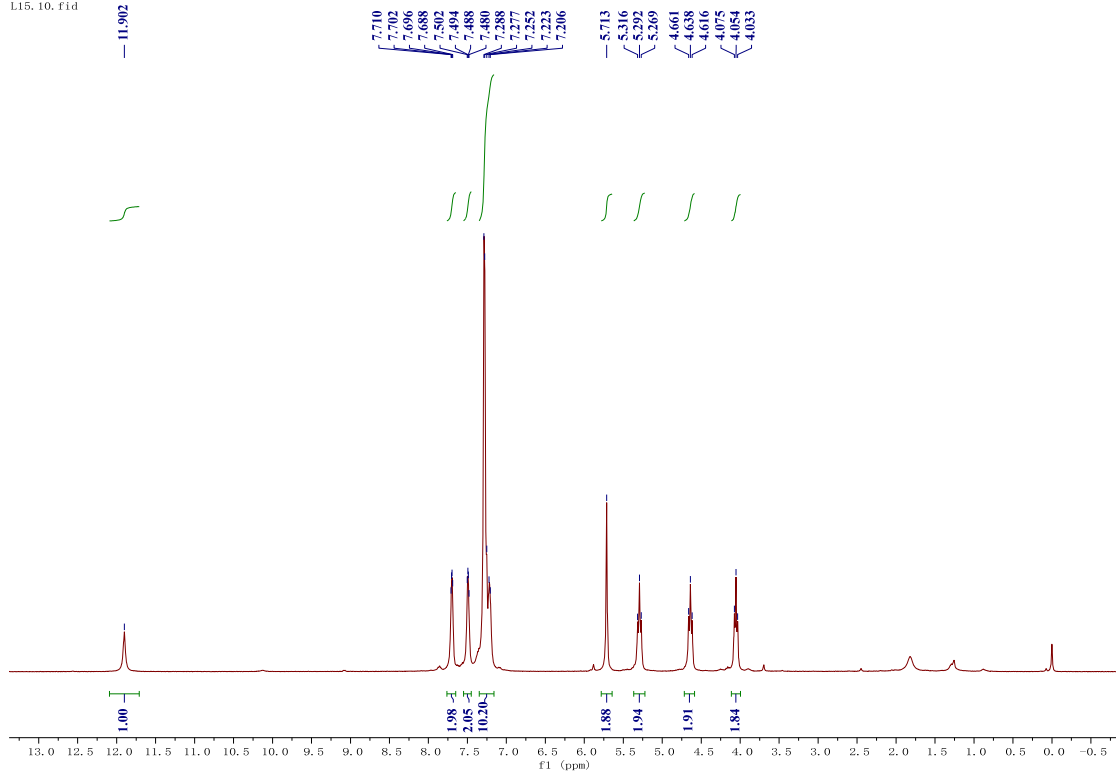

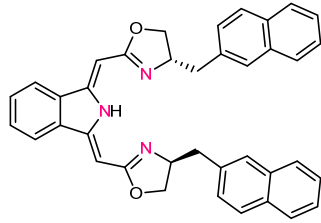

L\*16

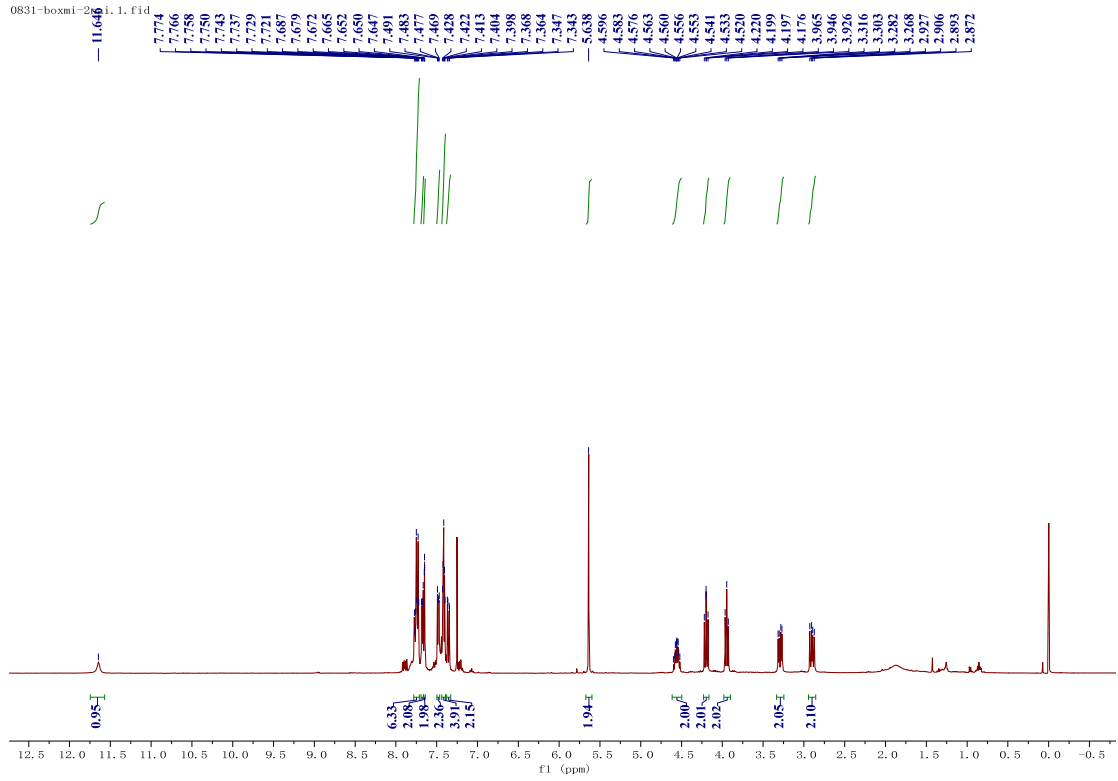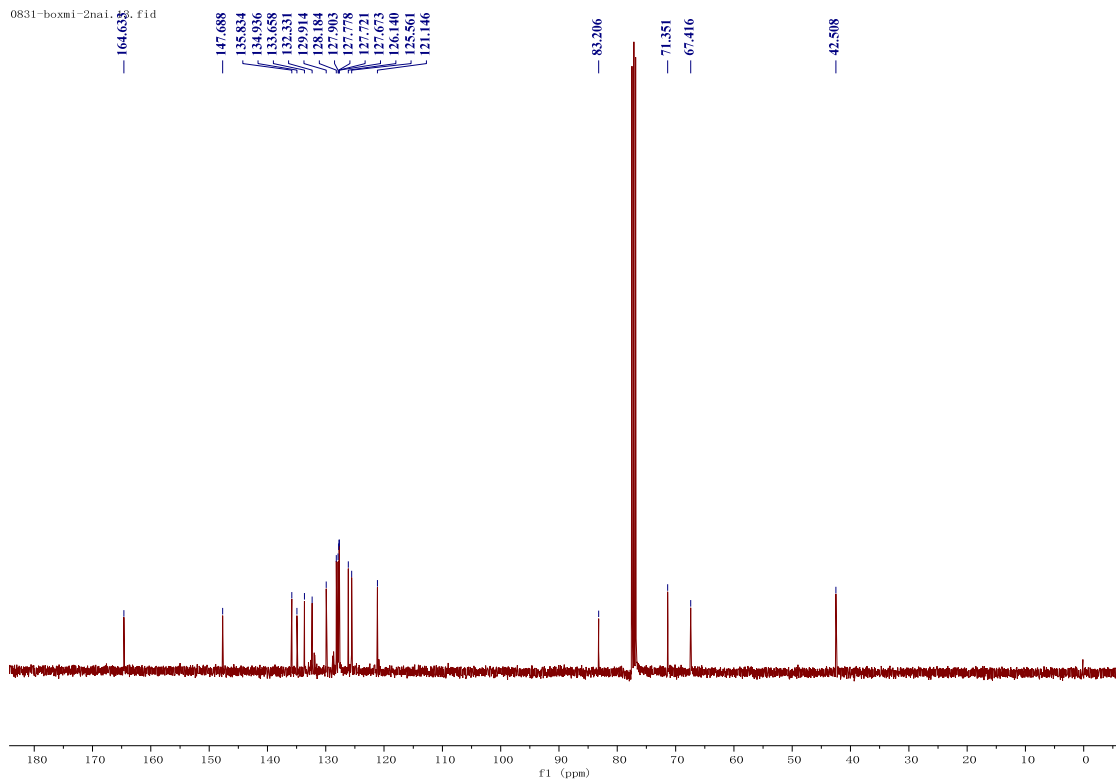



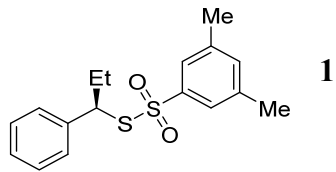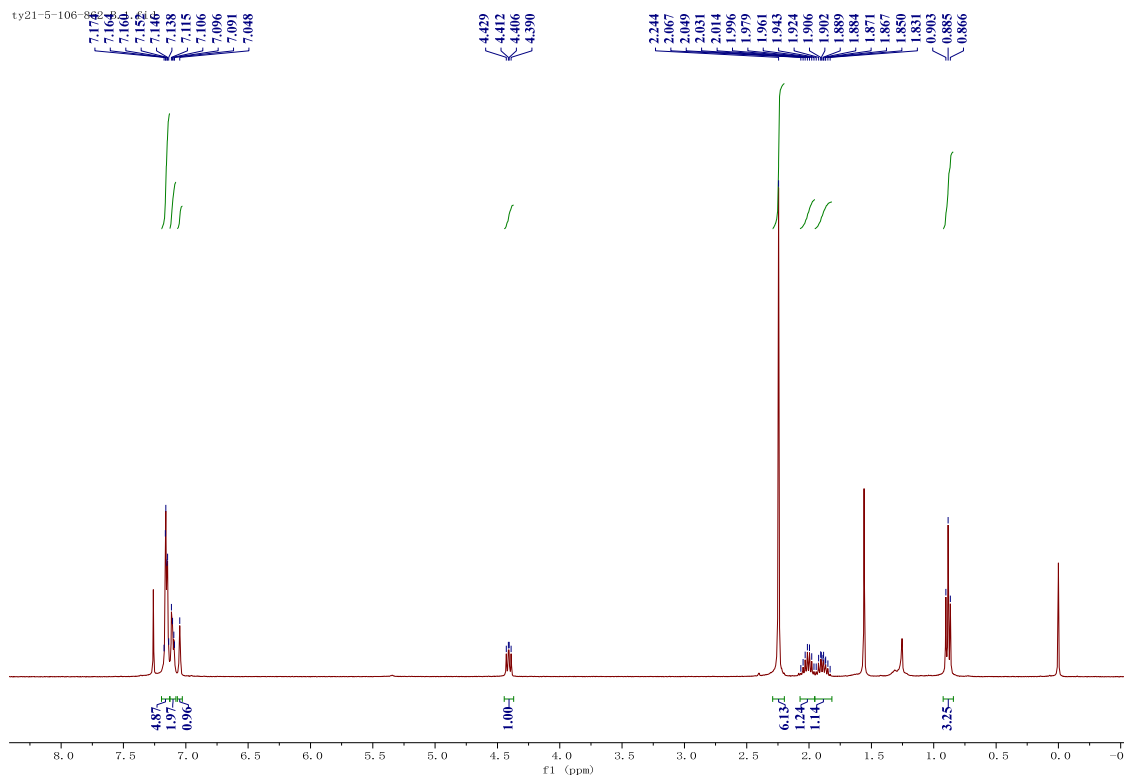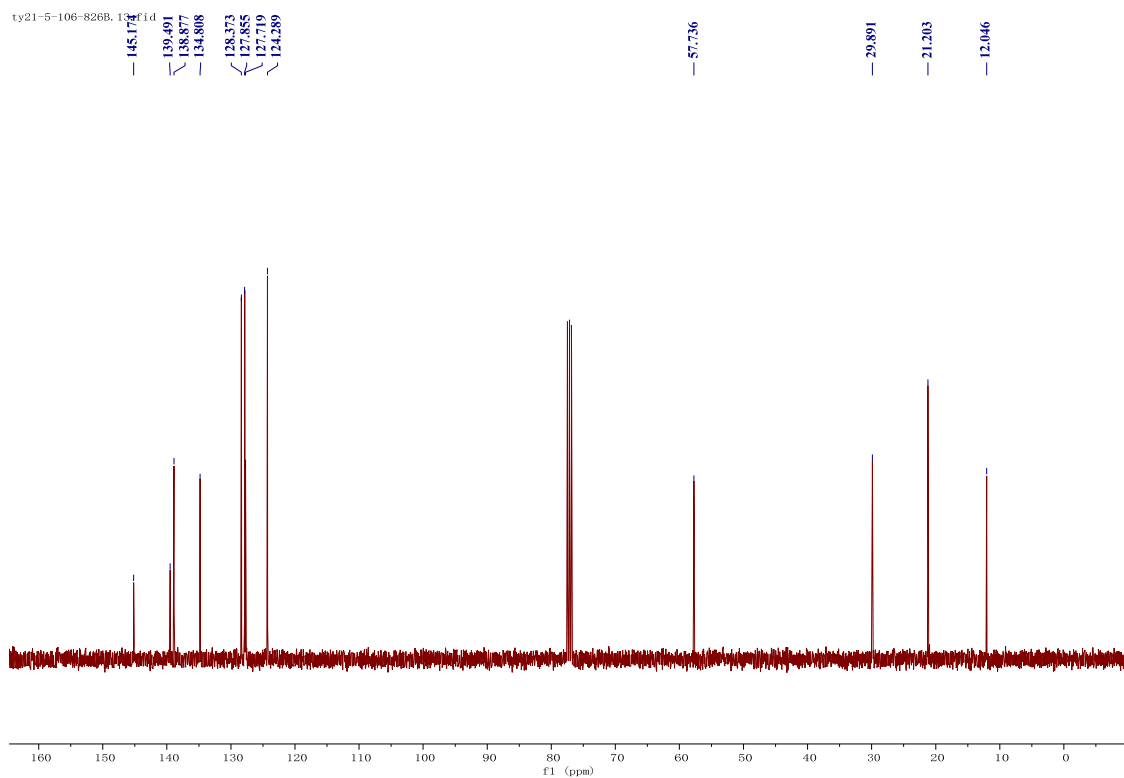

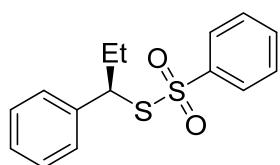

2

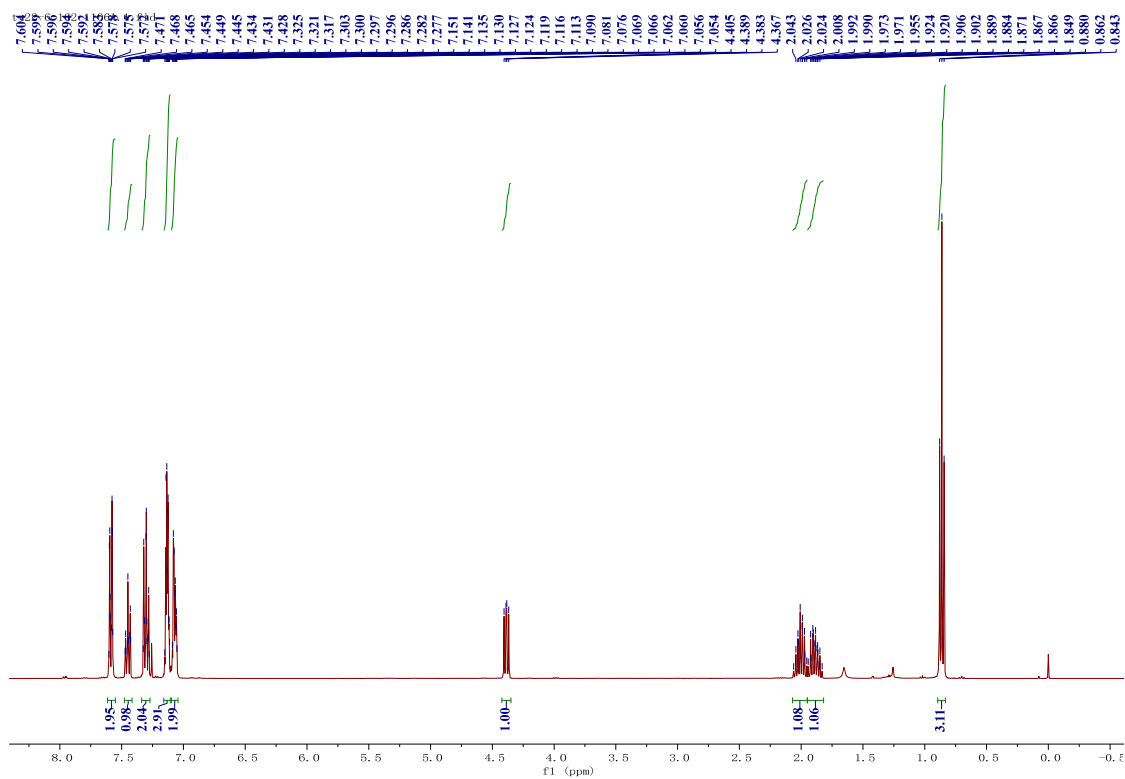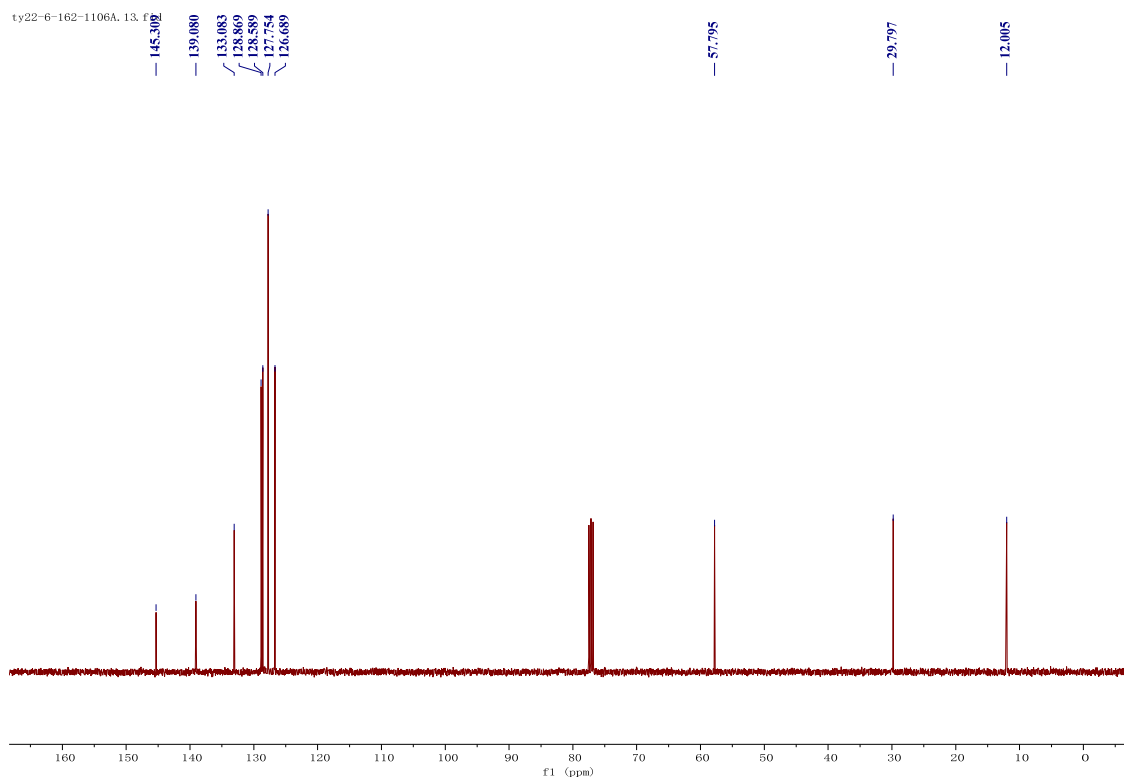

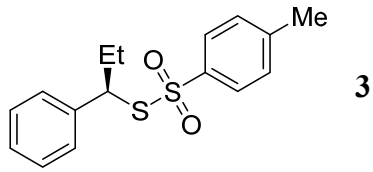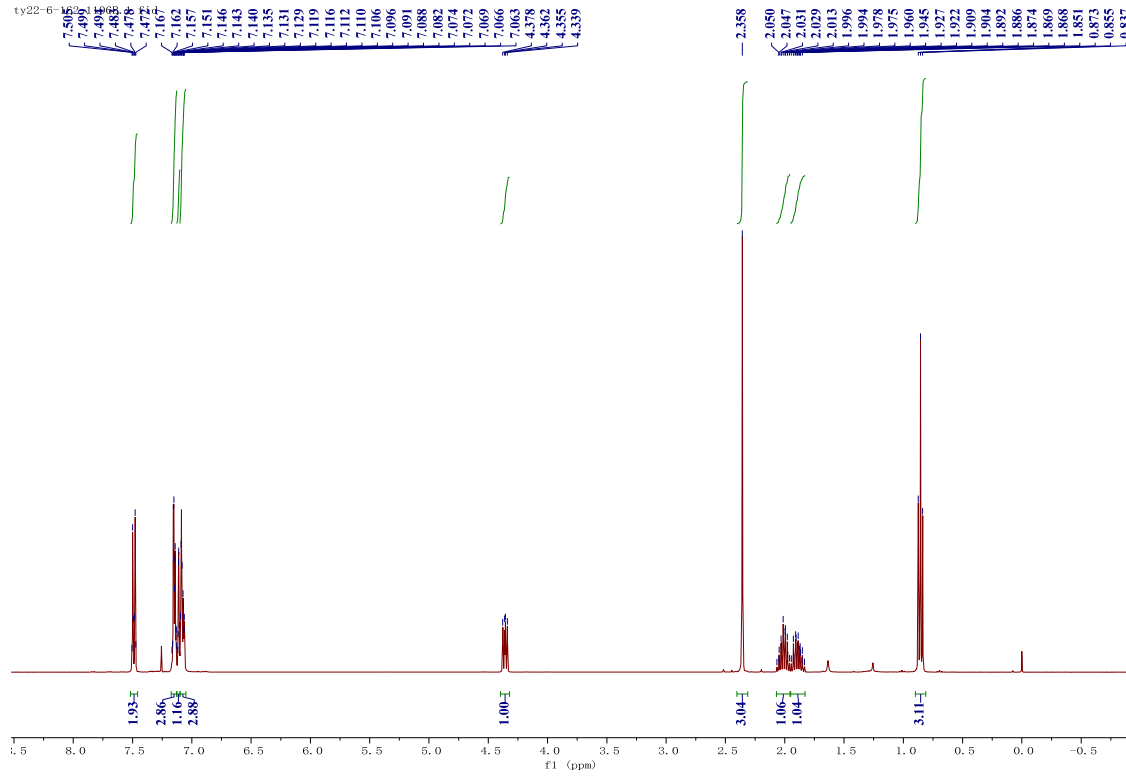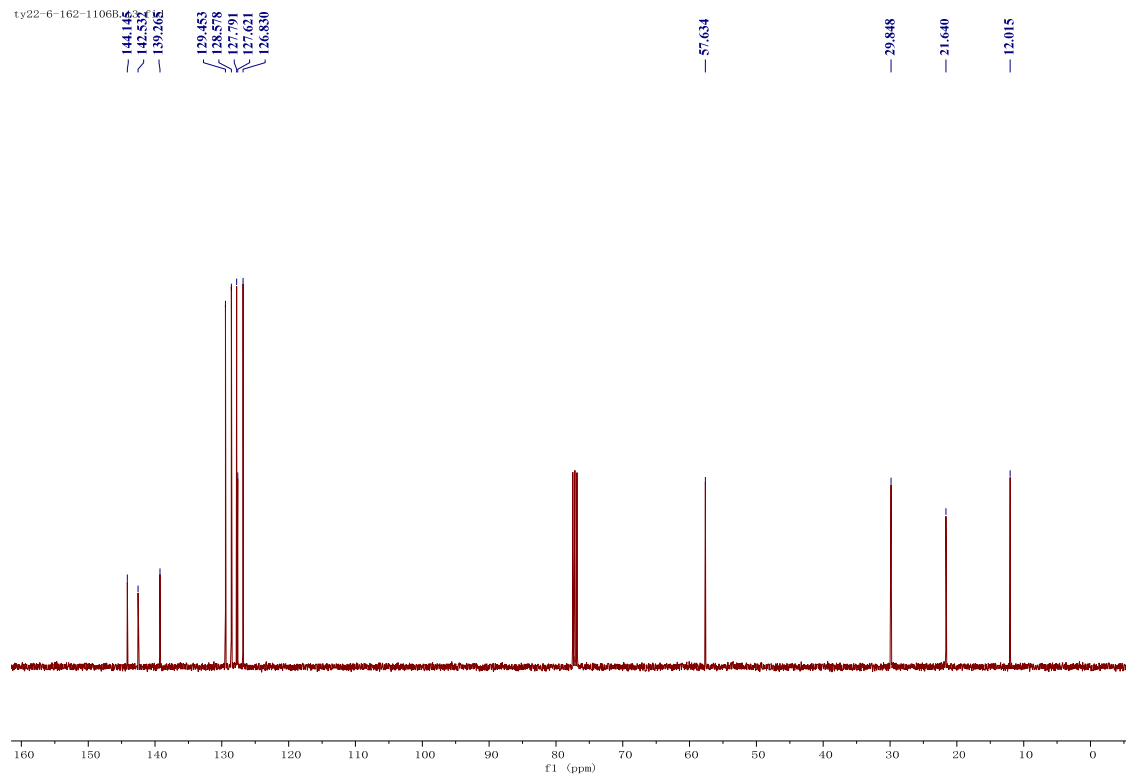

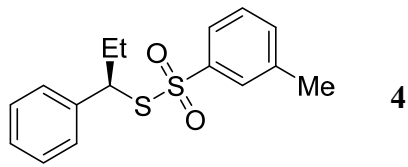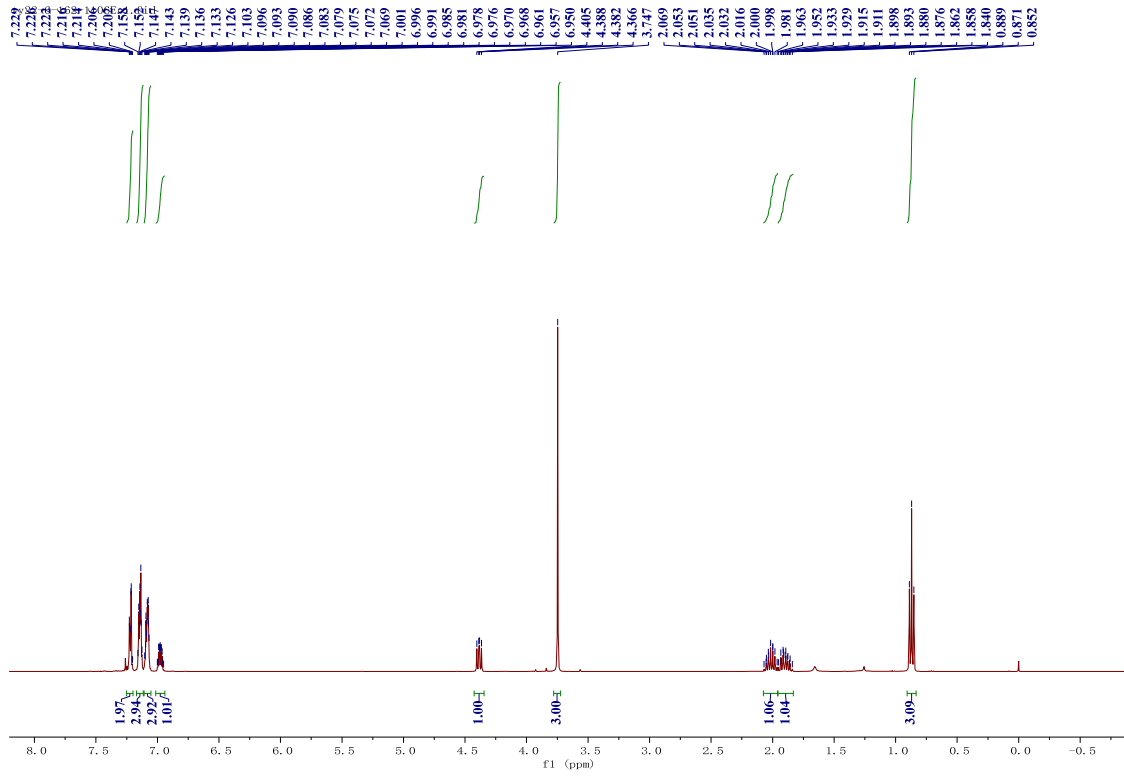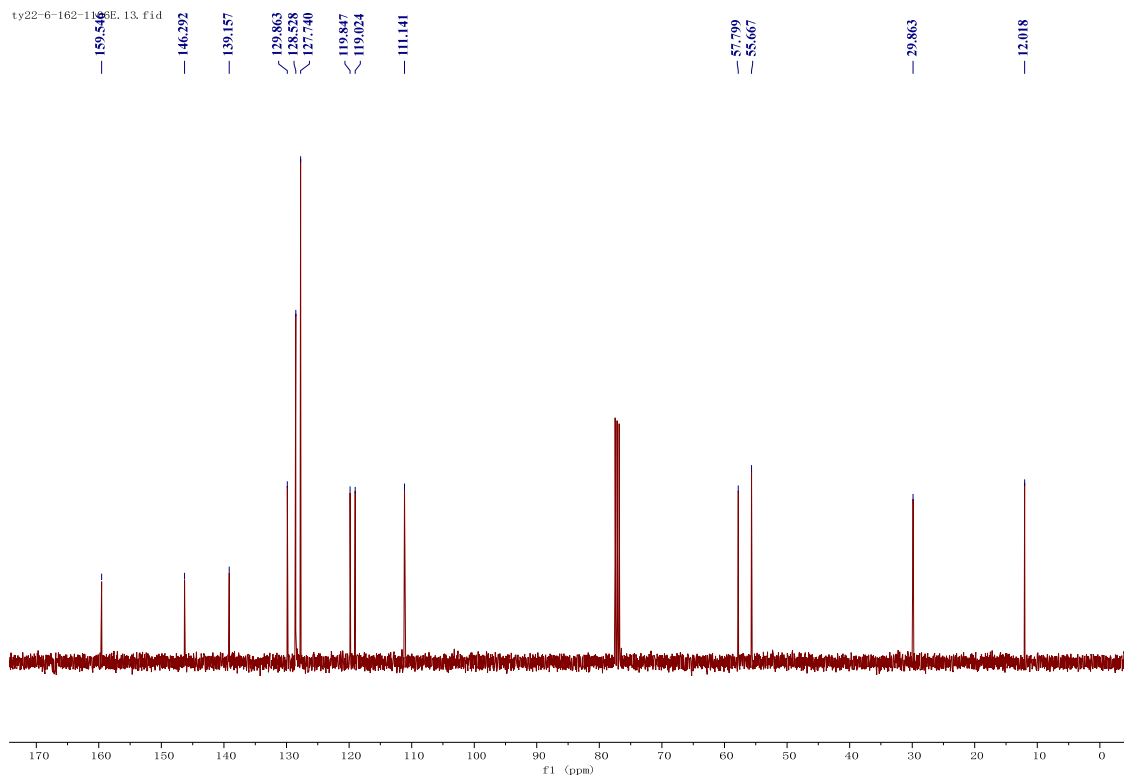

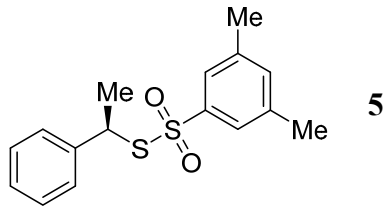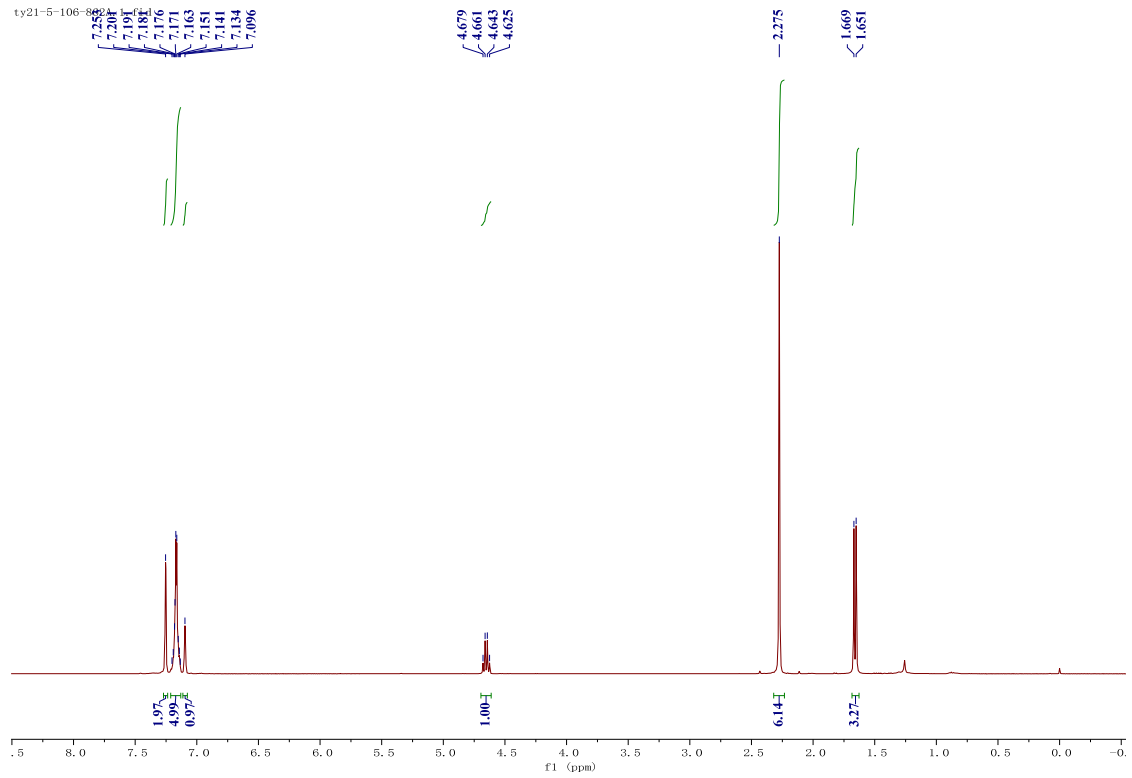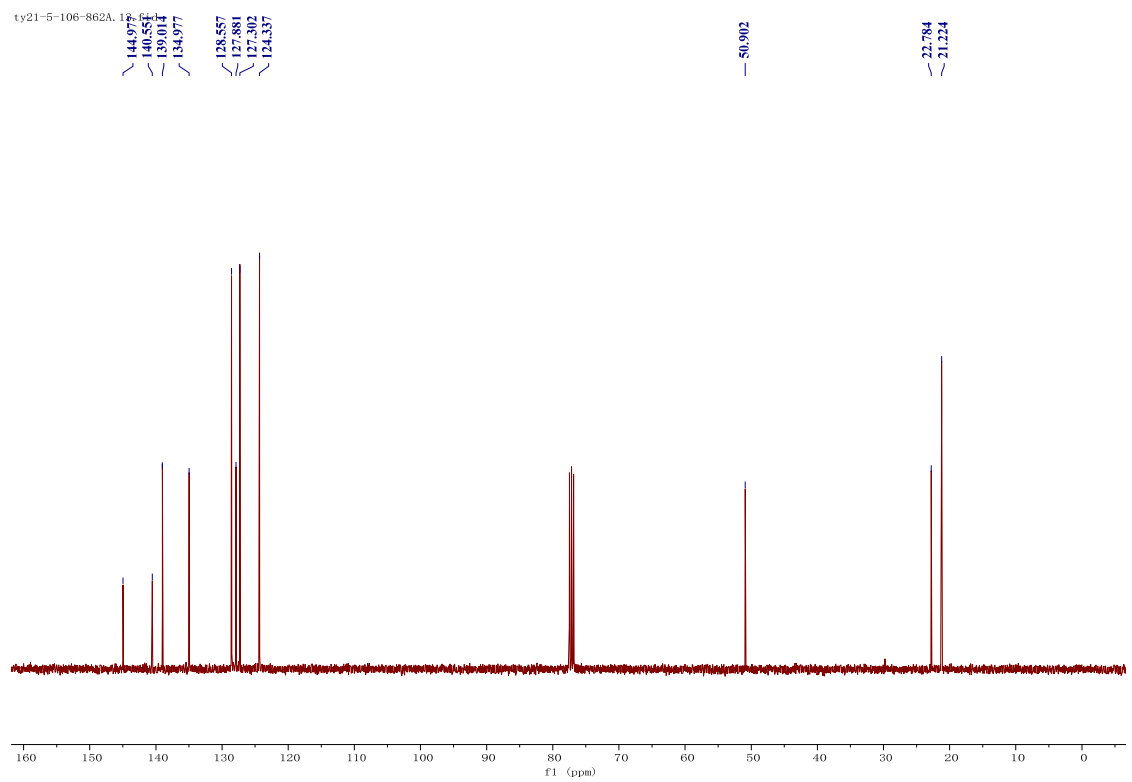

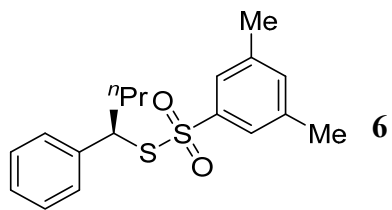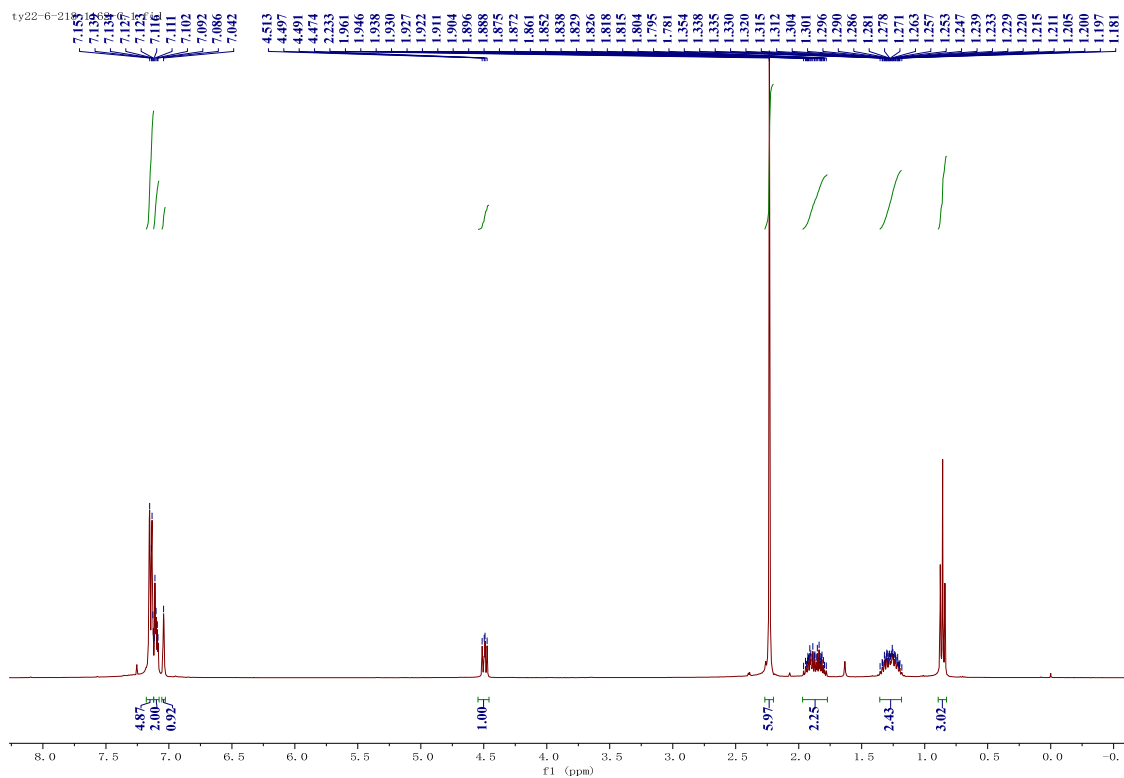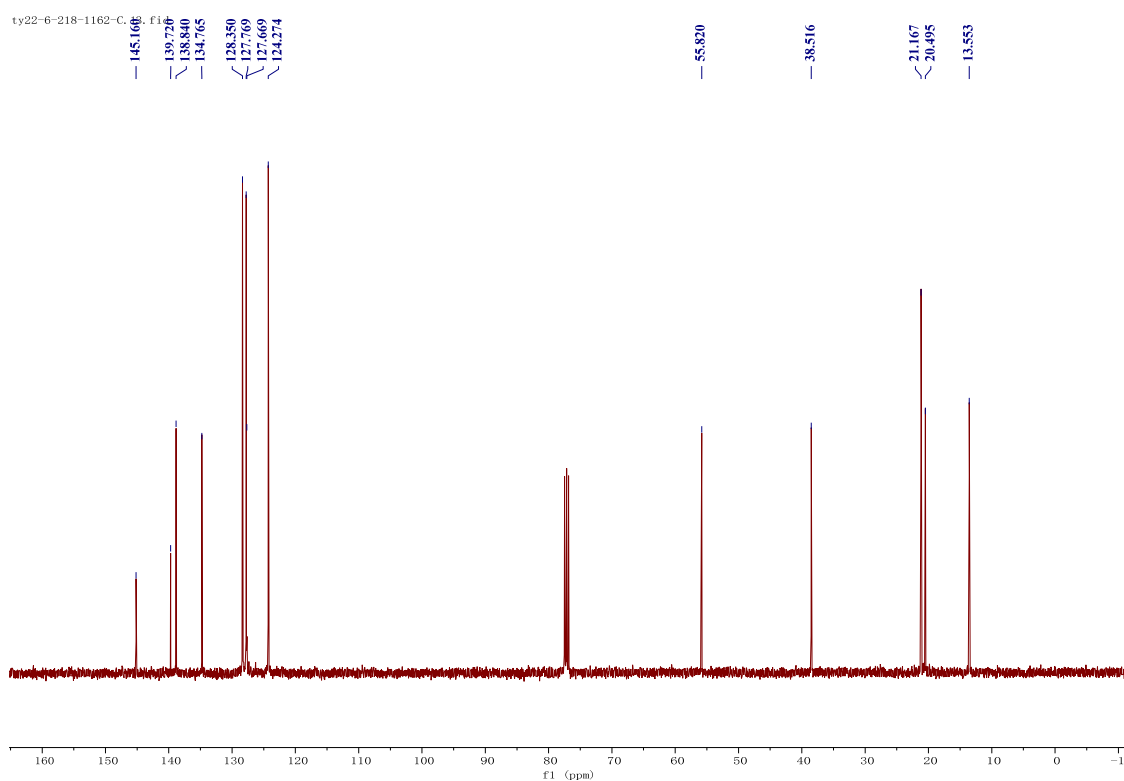

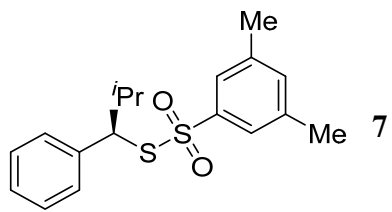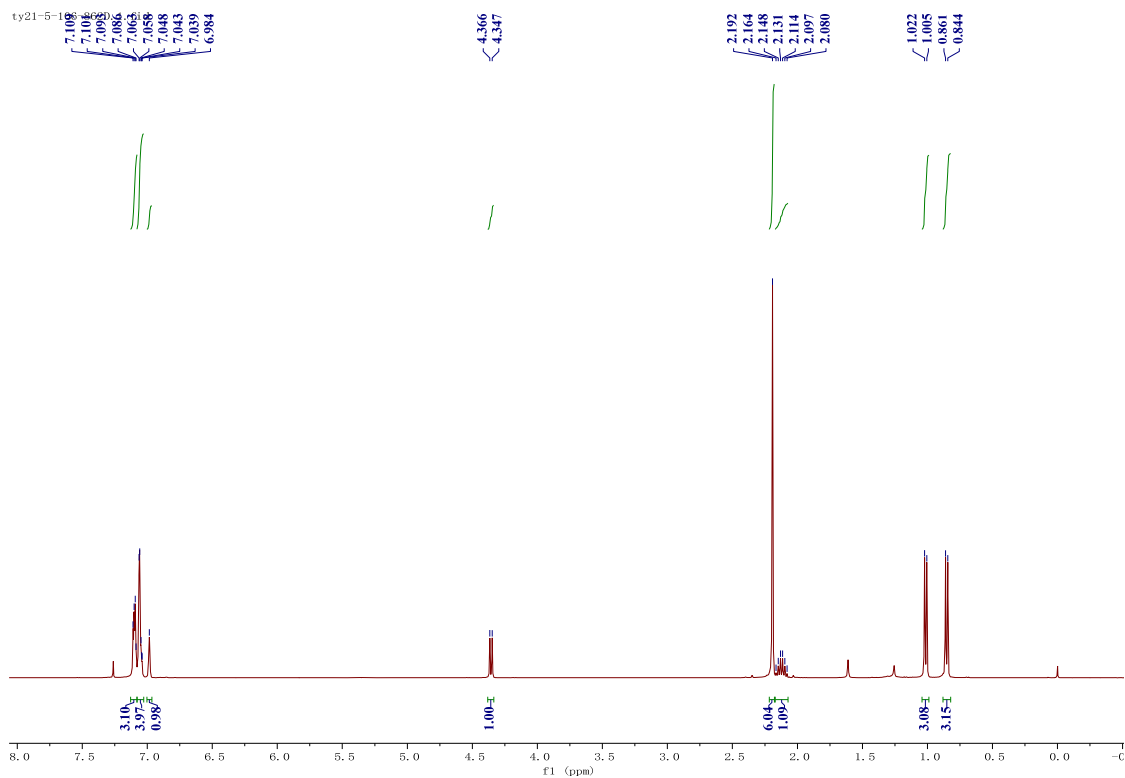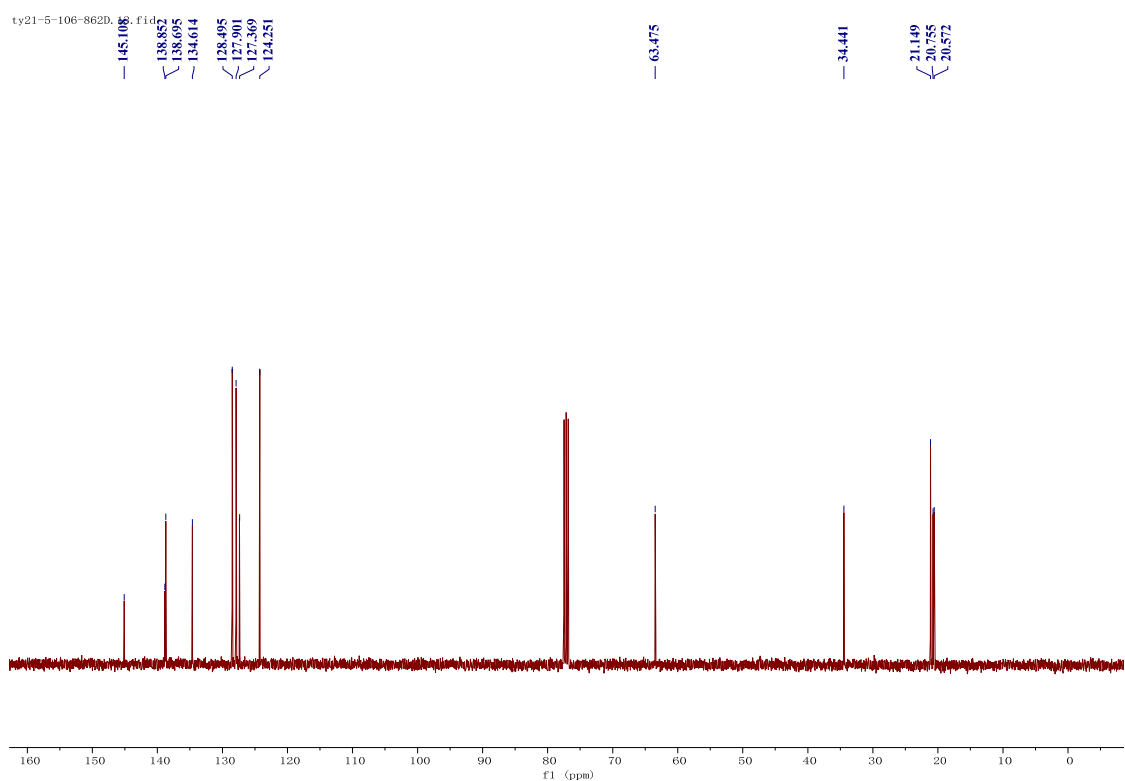

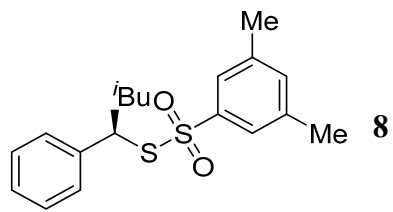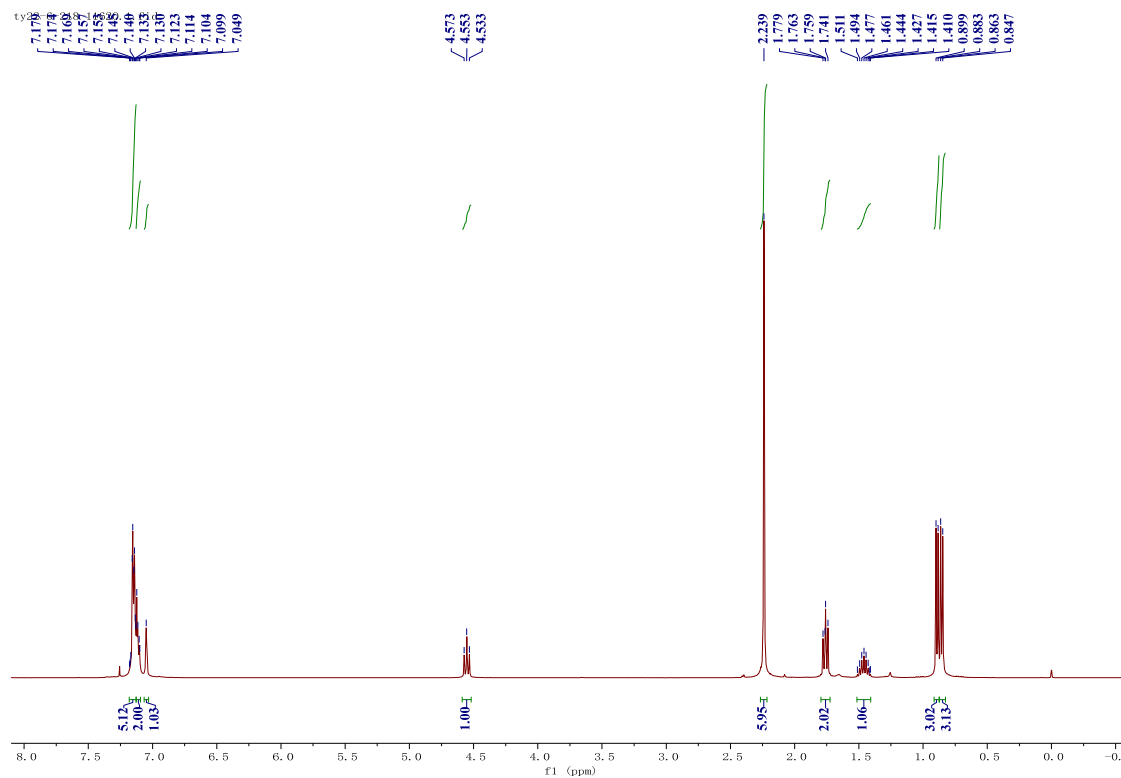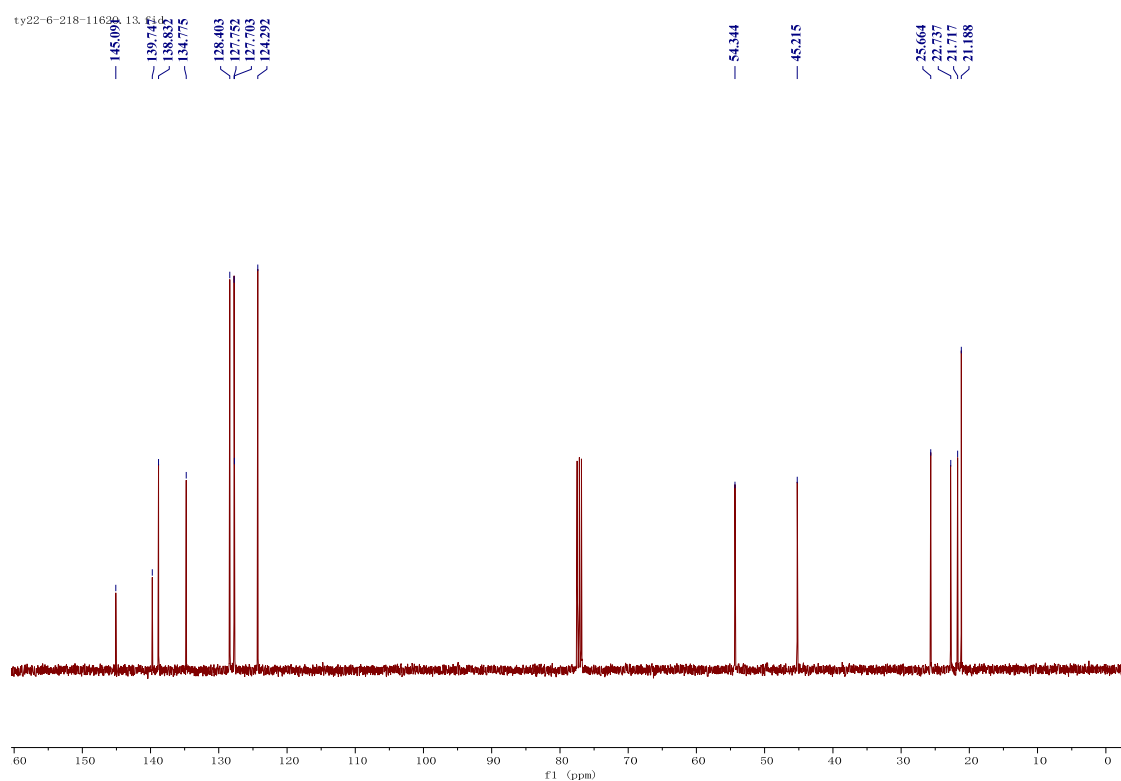



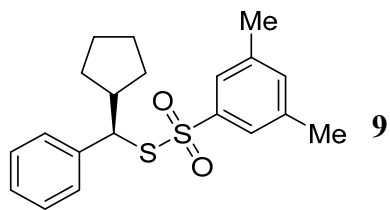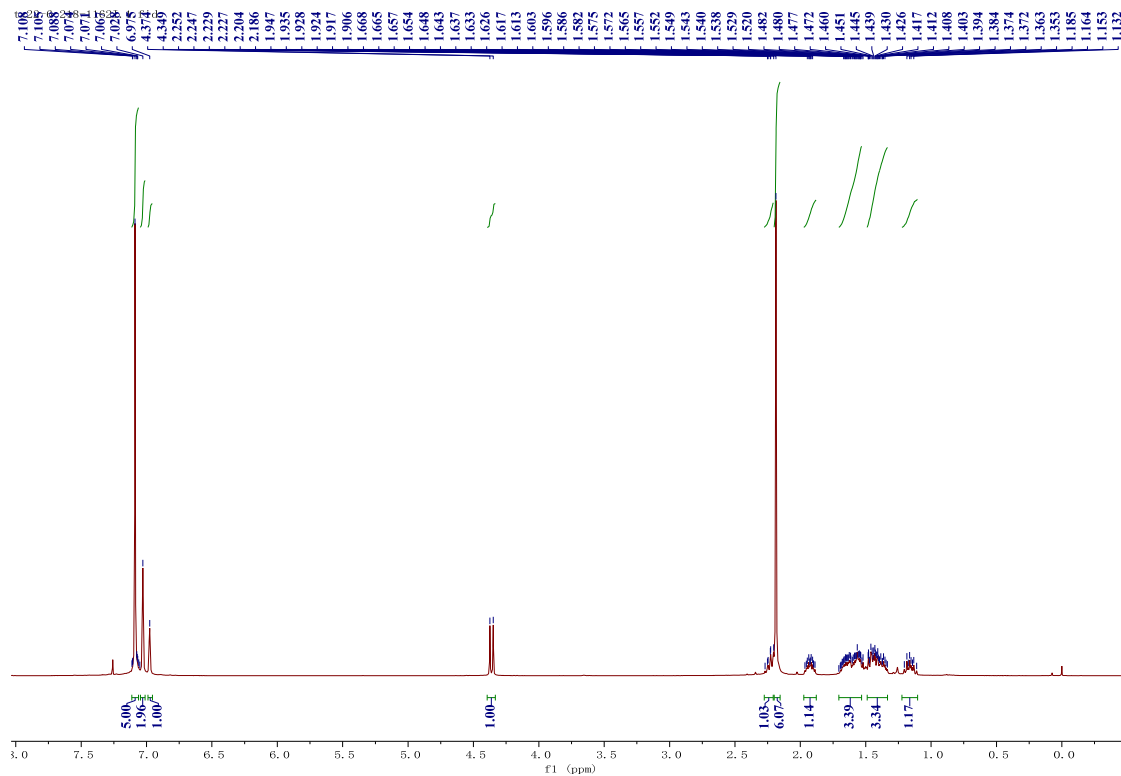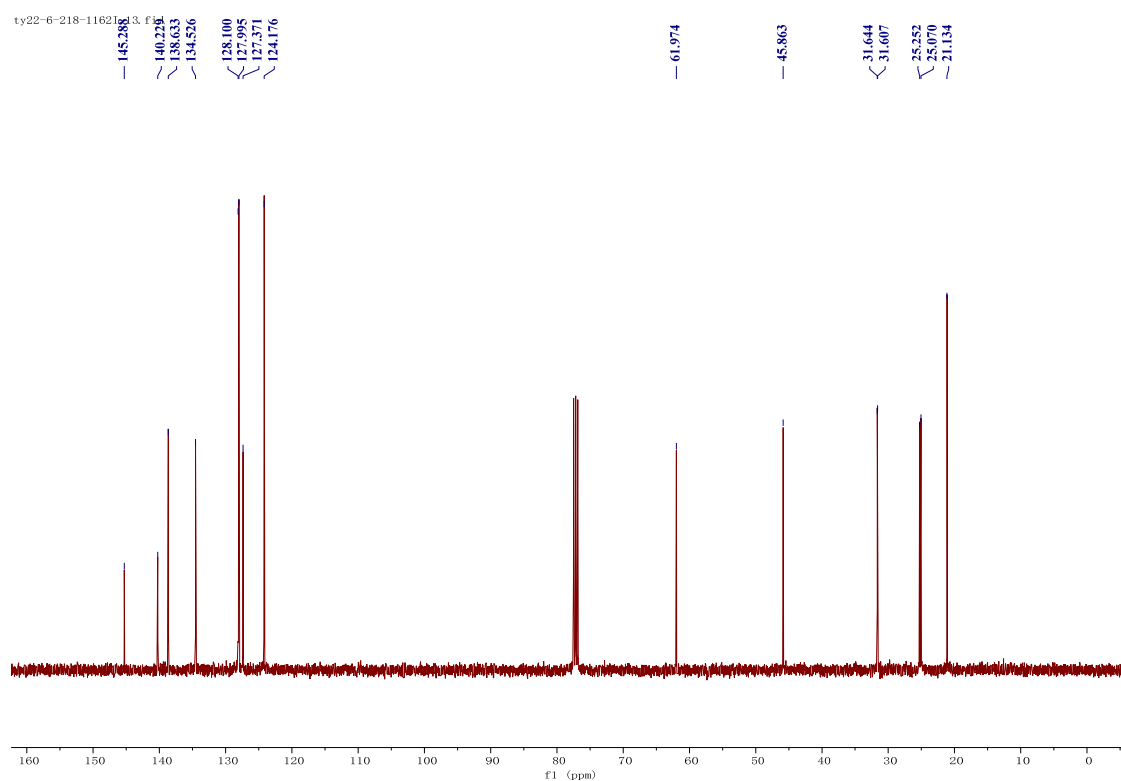

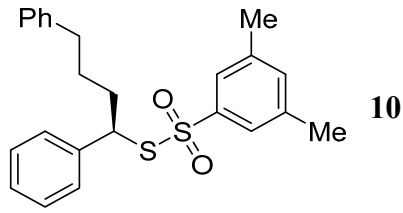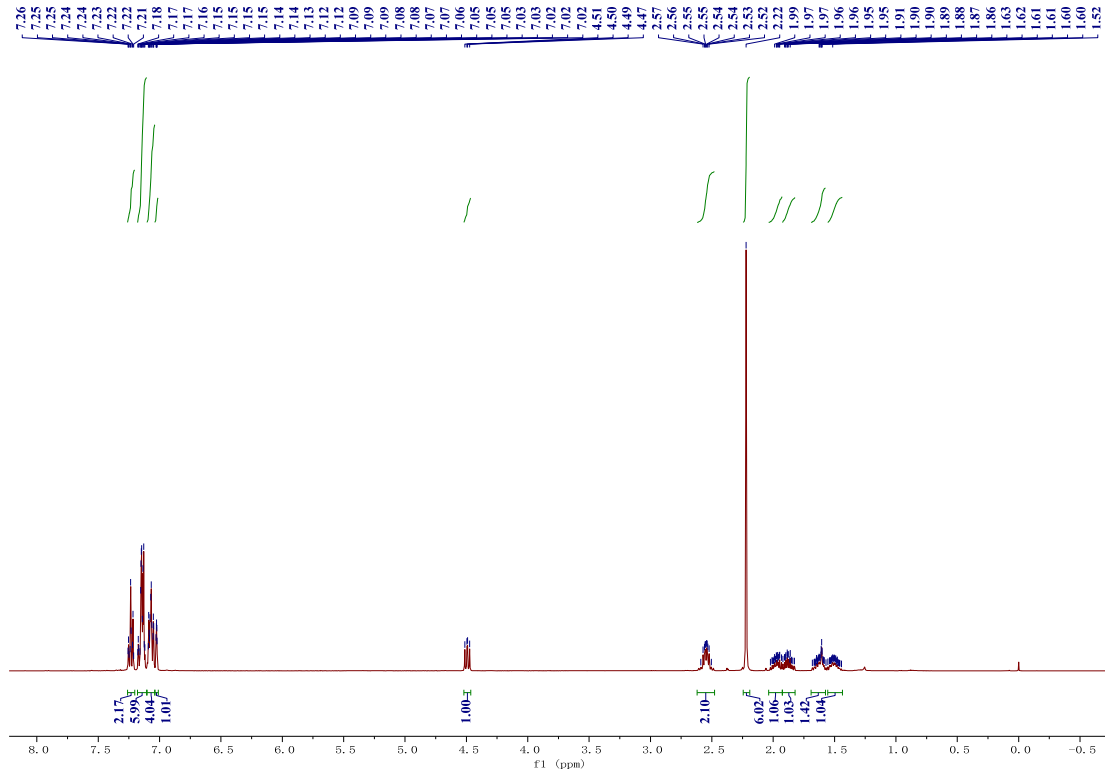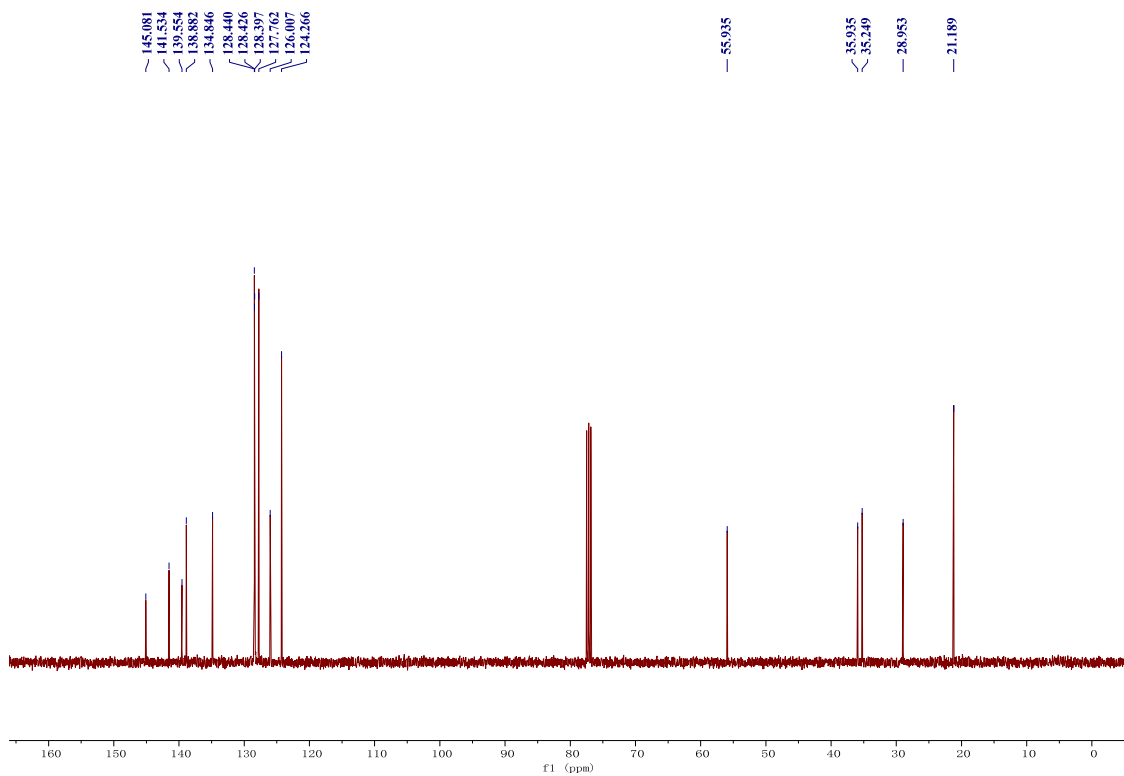

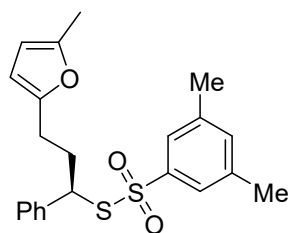

11

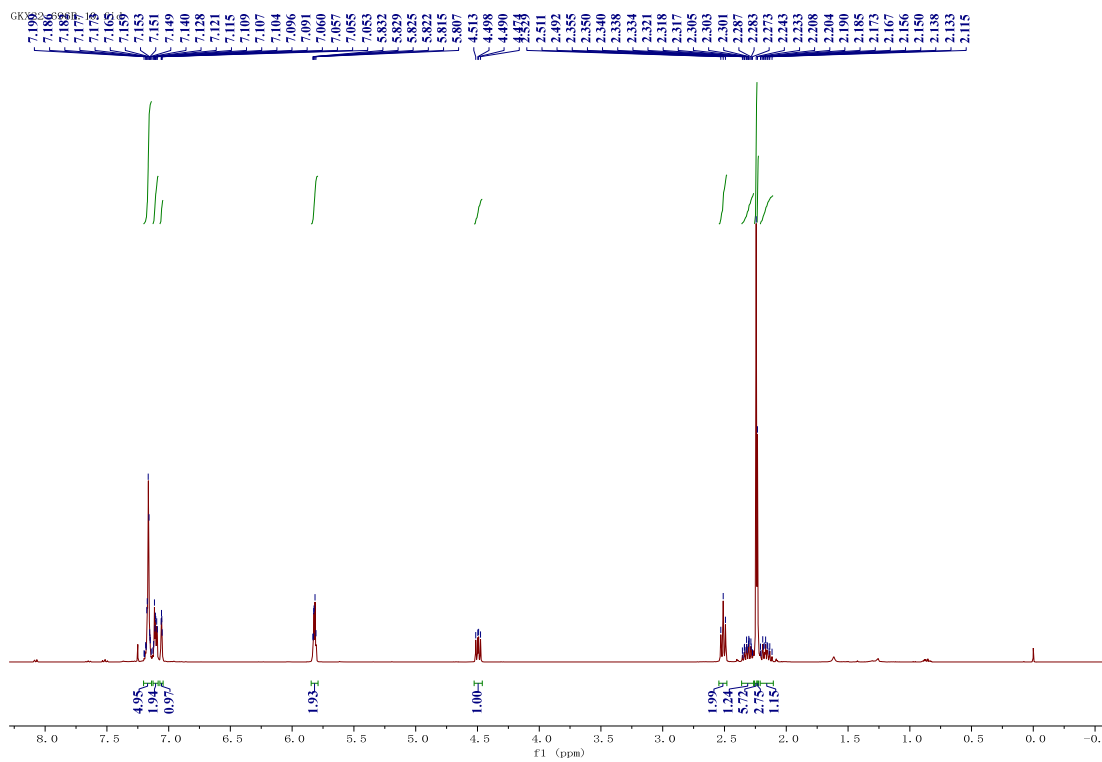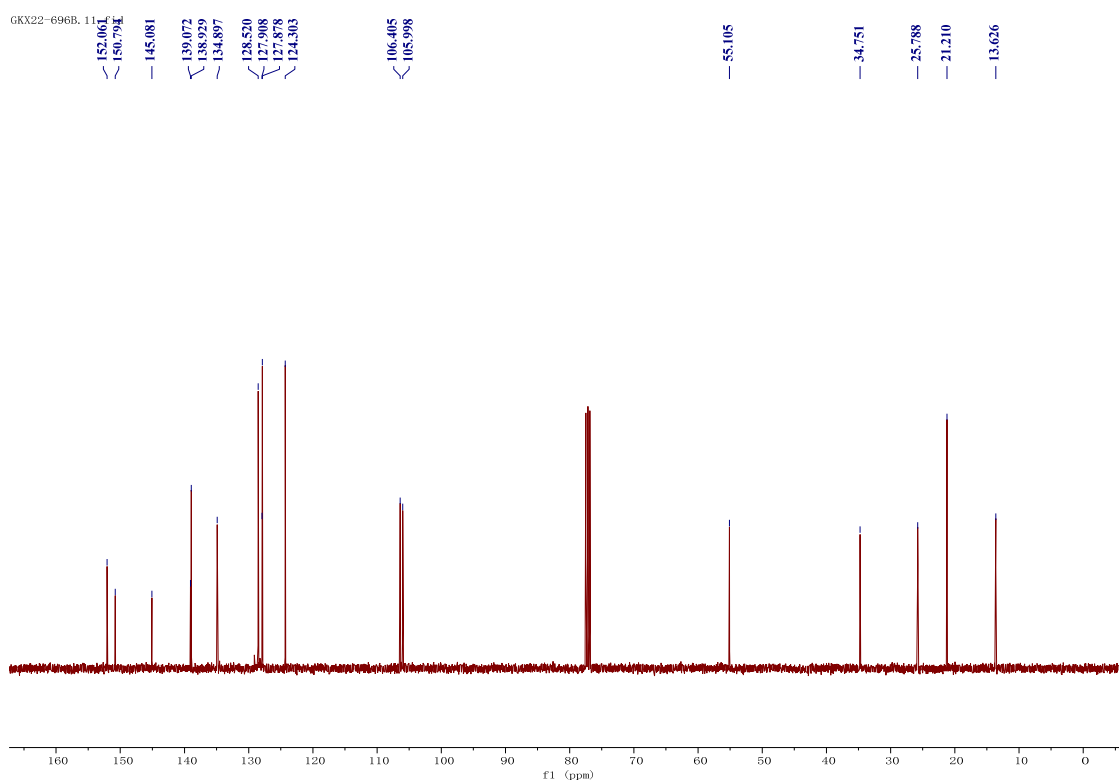

S266

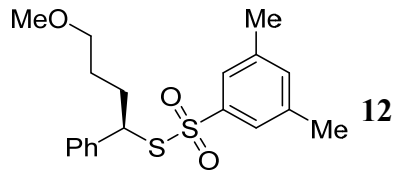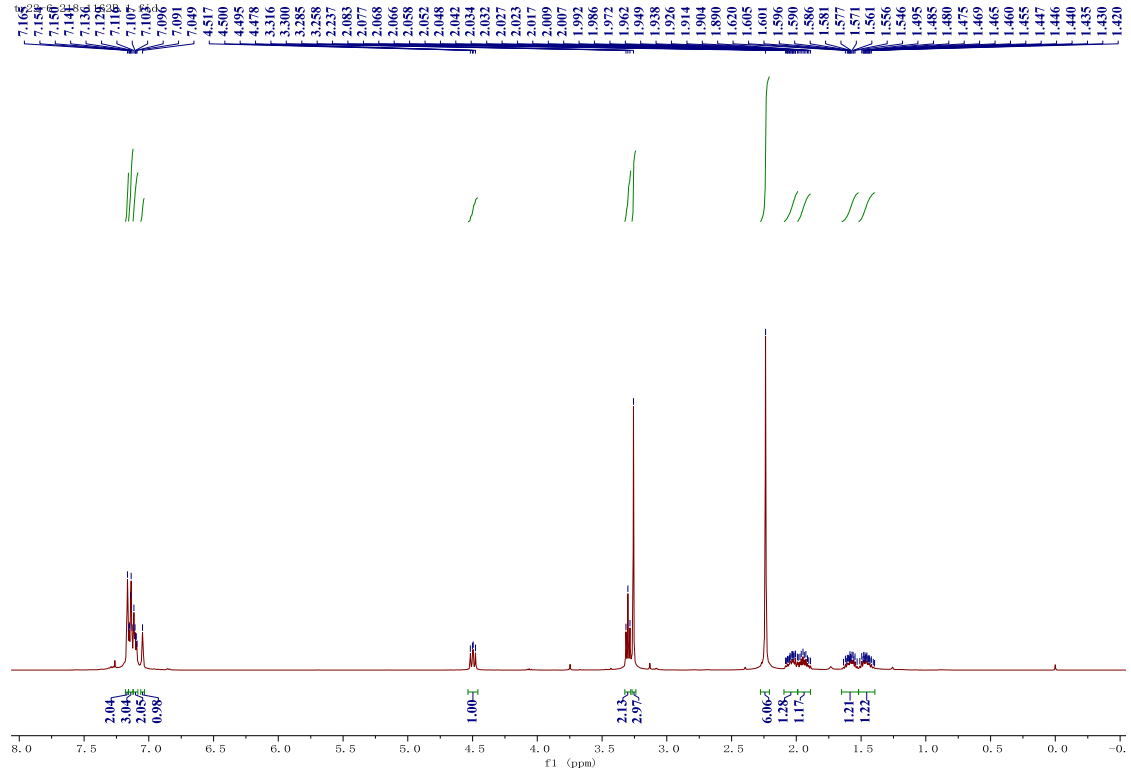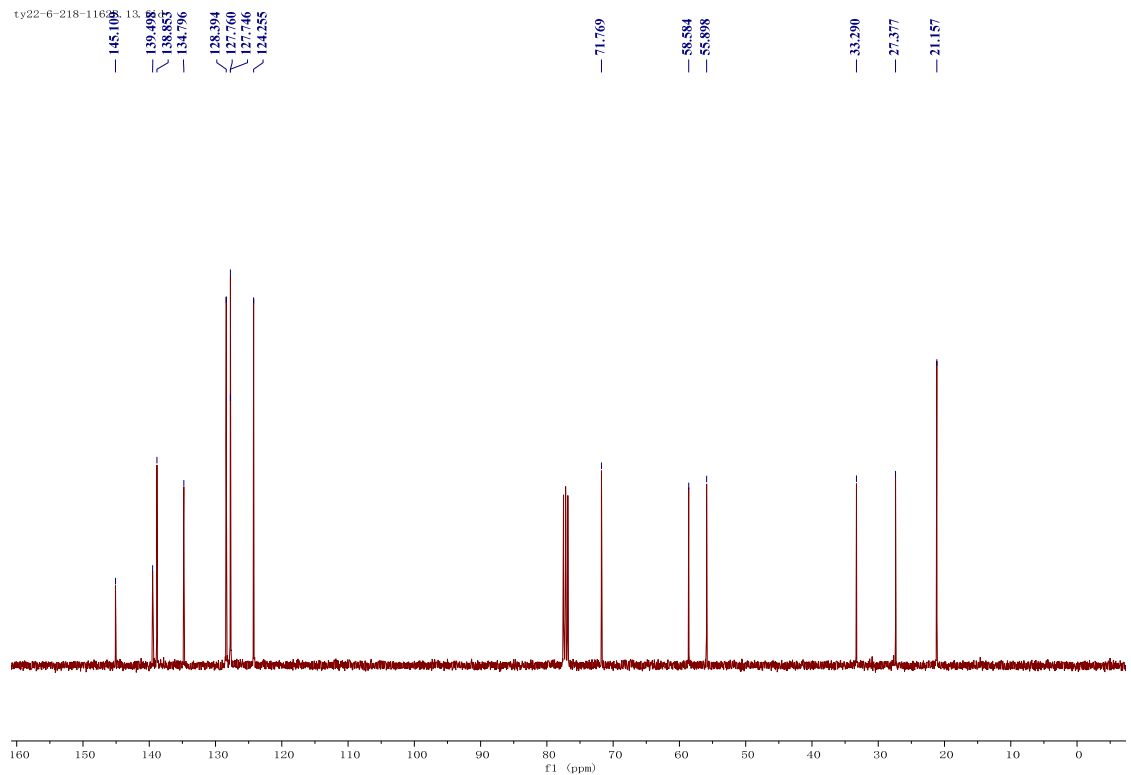

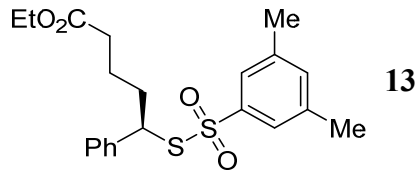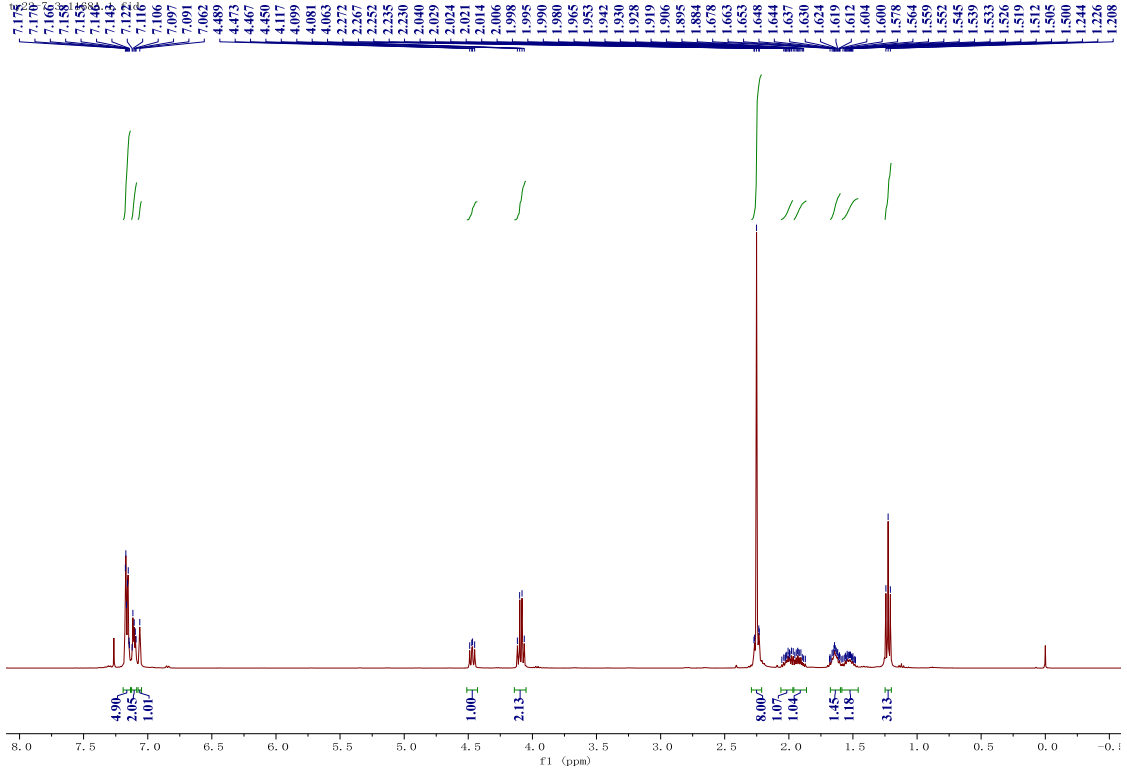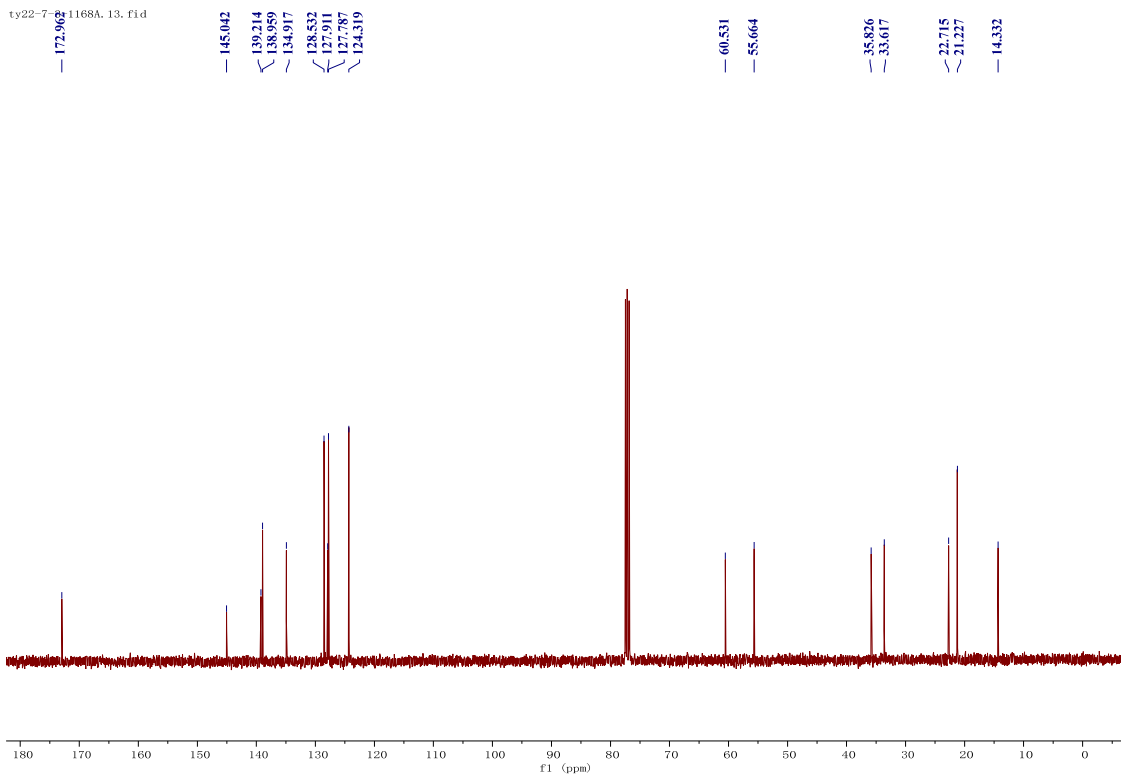

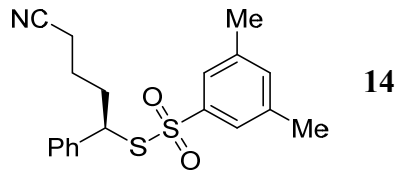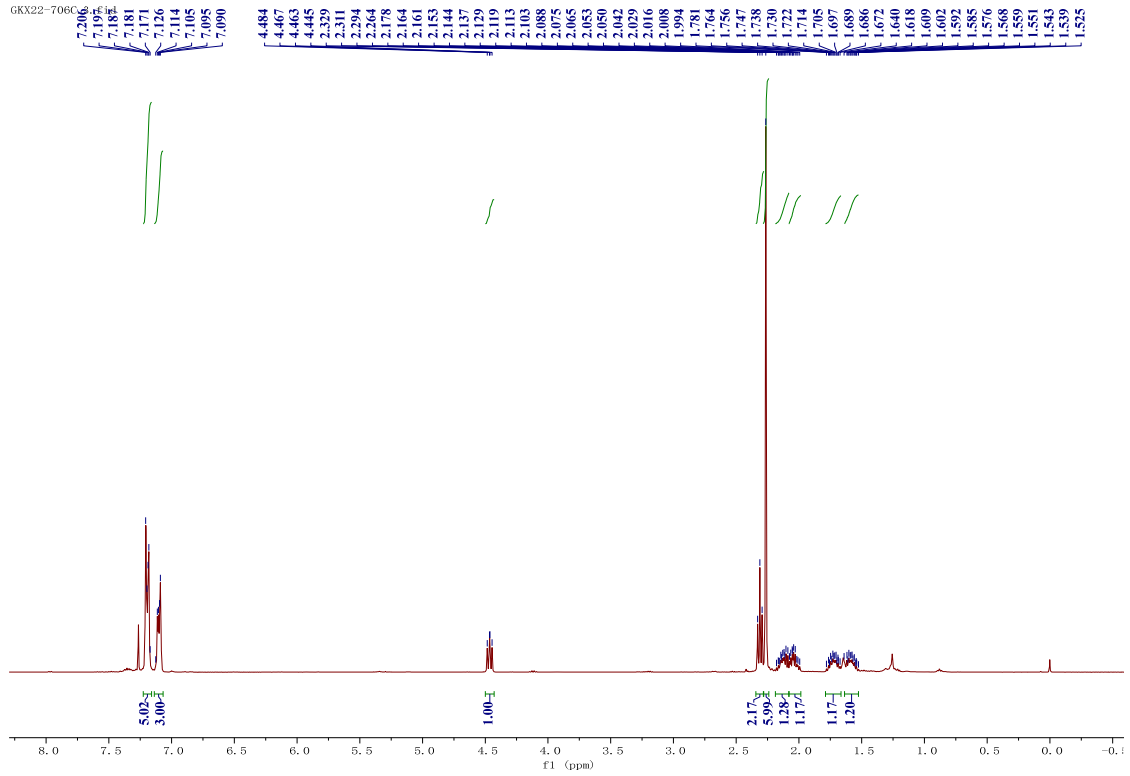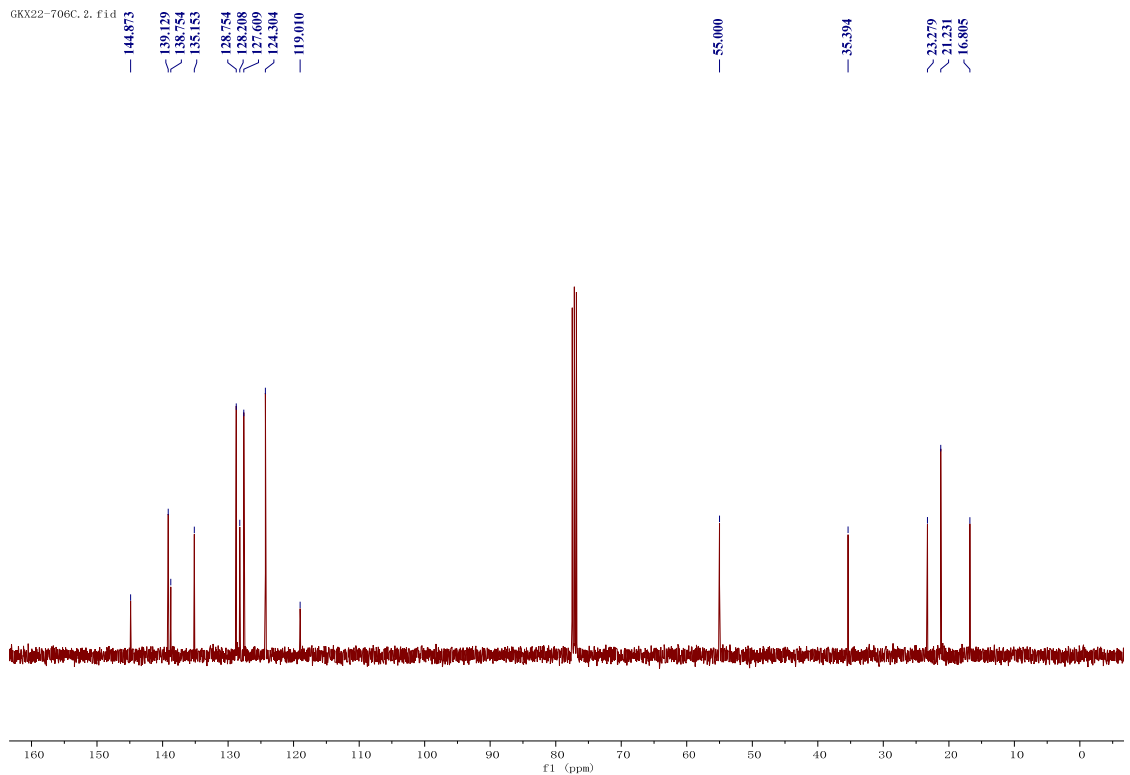

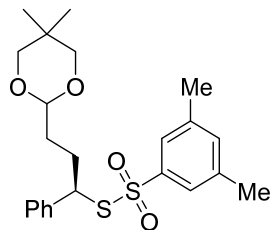

15

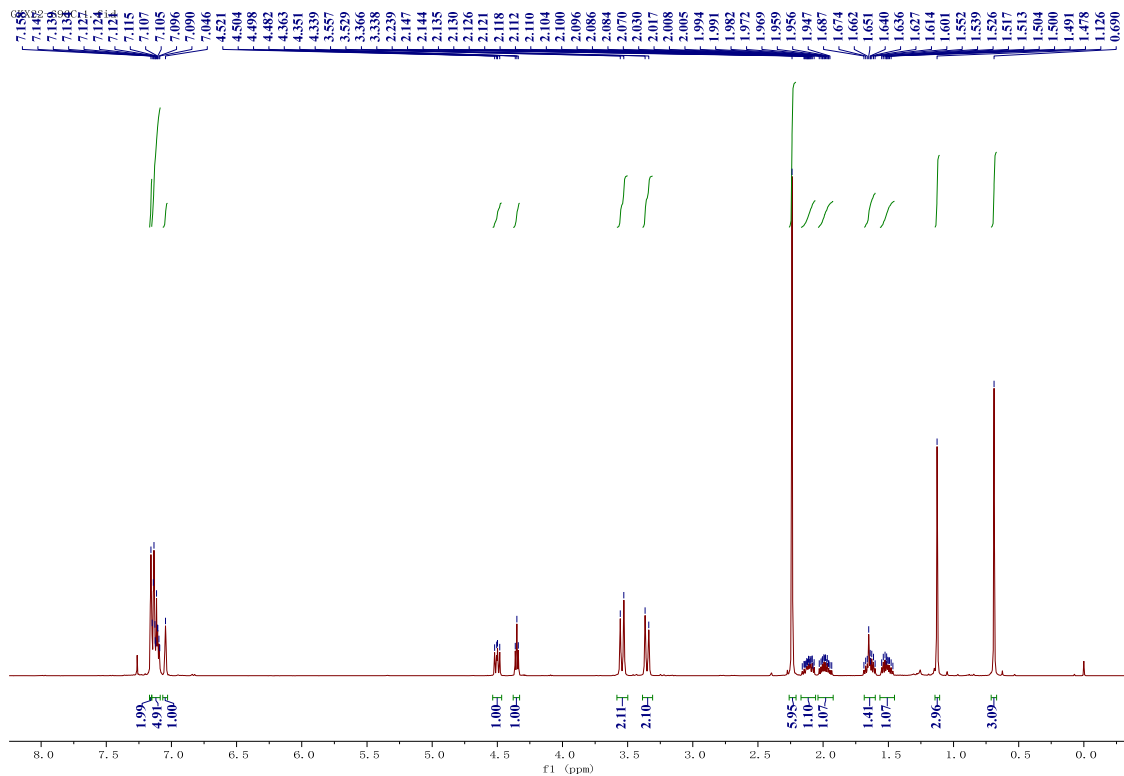

GKX22-696C, 2.fid

145.131  
 139.416  
 138.868  
 134.814  
 128.428  
 127.863  
 127.775  
 124.305  
 101.114  
 55.967  
 32.485  
 30.700  
 30.184  
 23.064  
 21.906  
 21.215

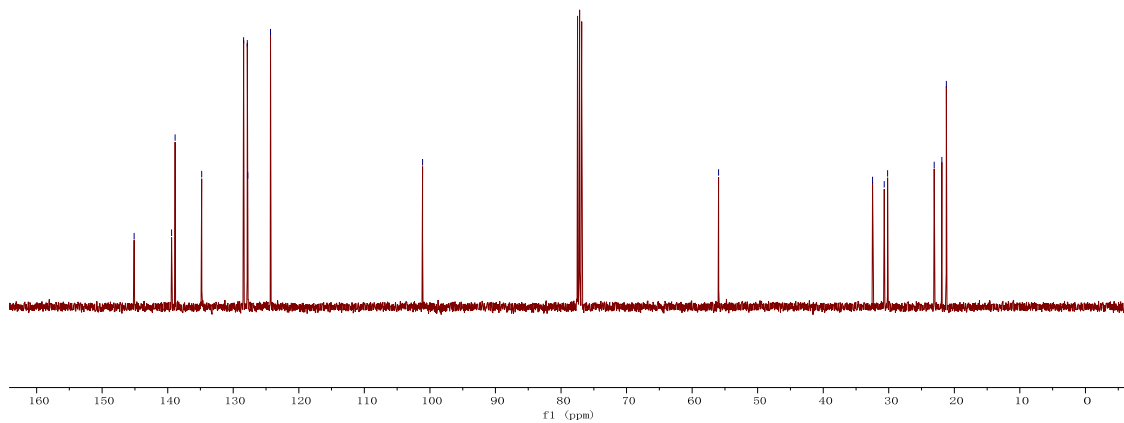

S270

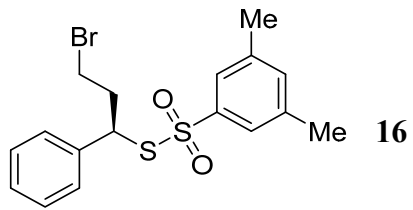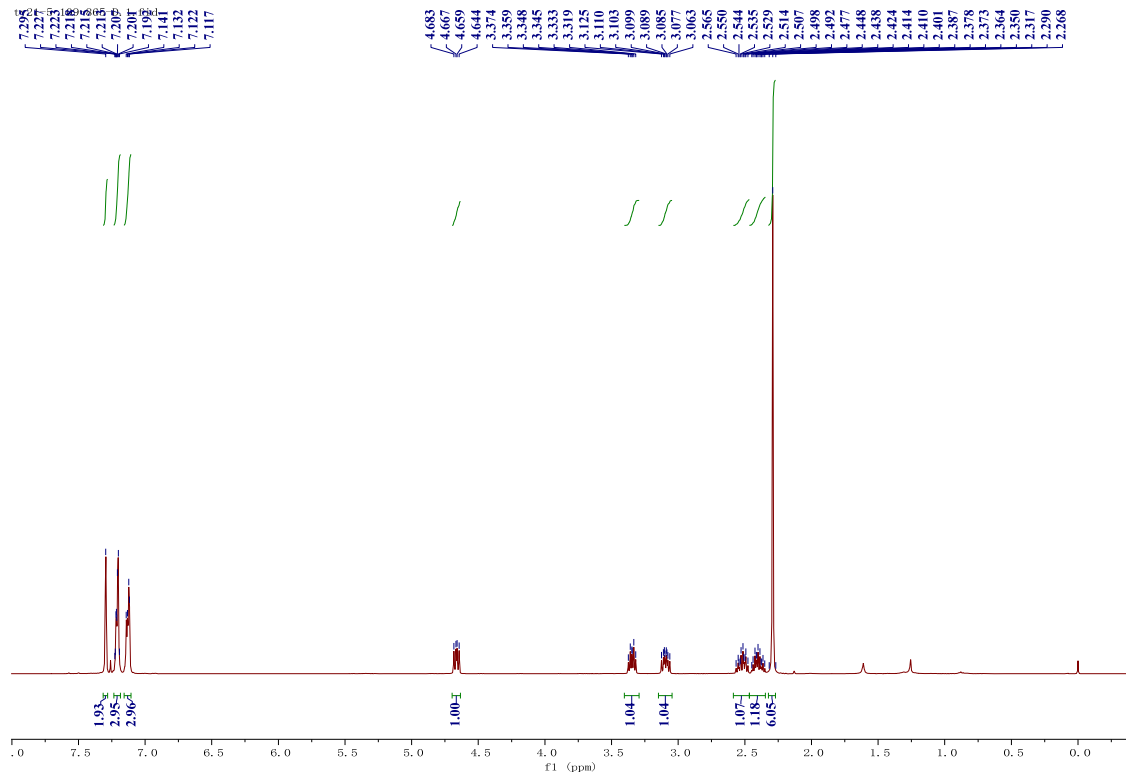

ty21-5-109-865-D, f1, fid

144.71, 139.175, 137.914, 135.227, 128.852, 128.330, 127.791, 124.524, 53.621, 38.722, 29.911, 21.257

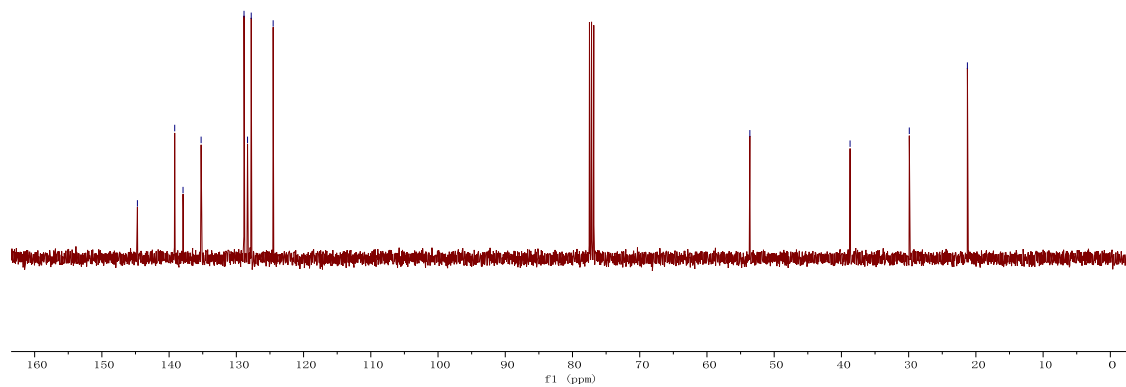



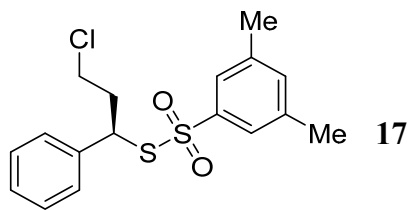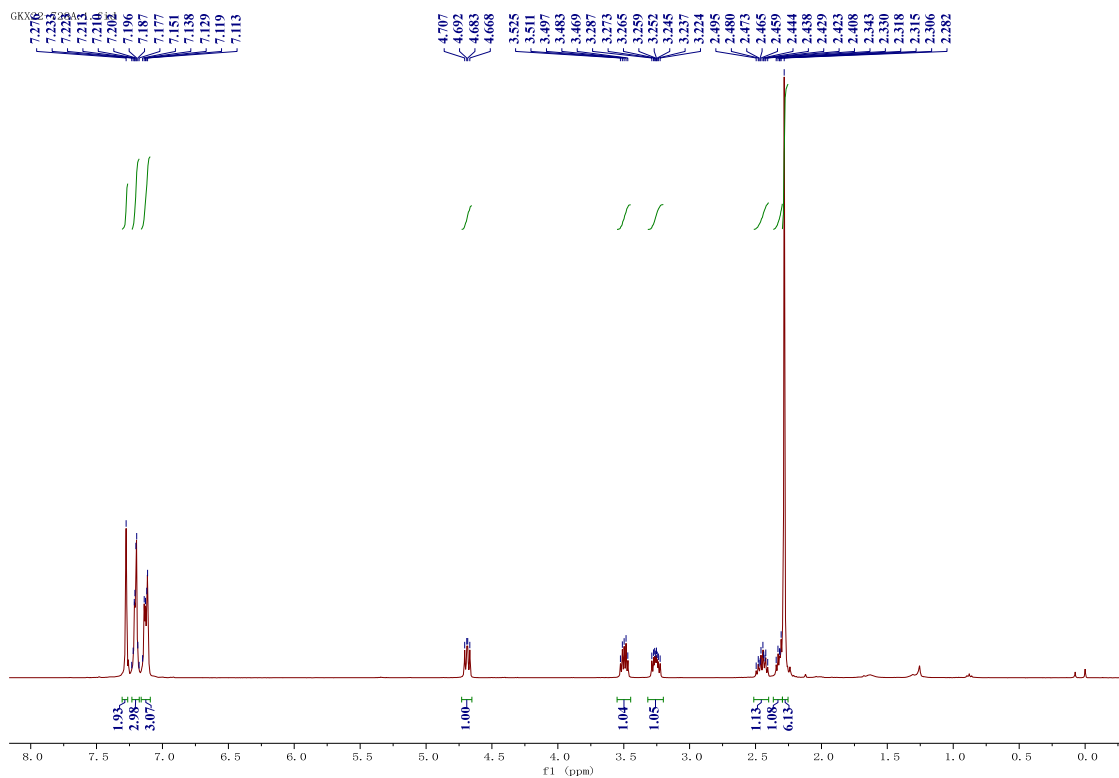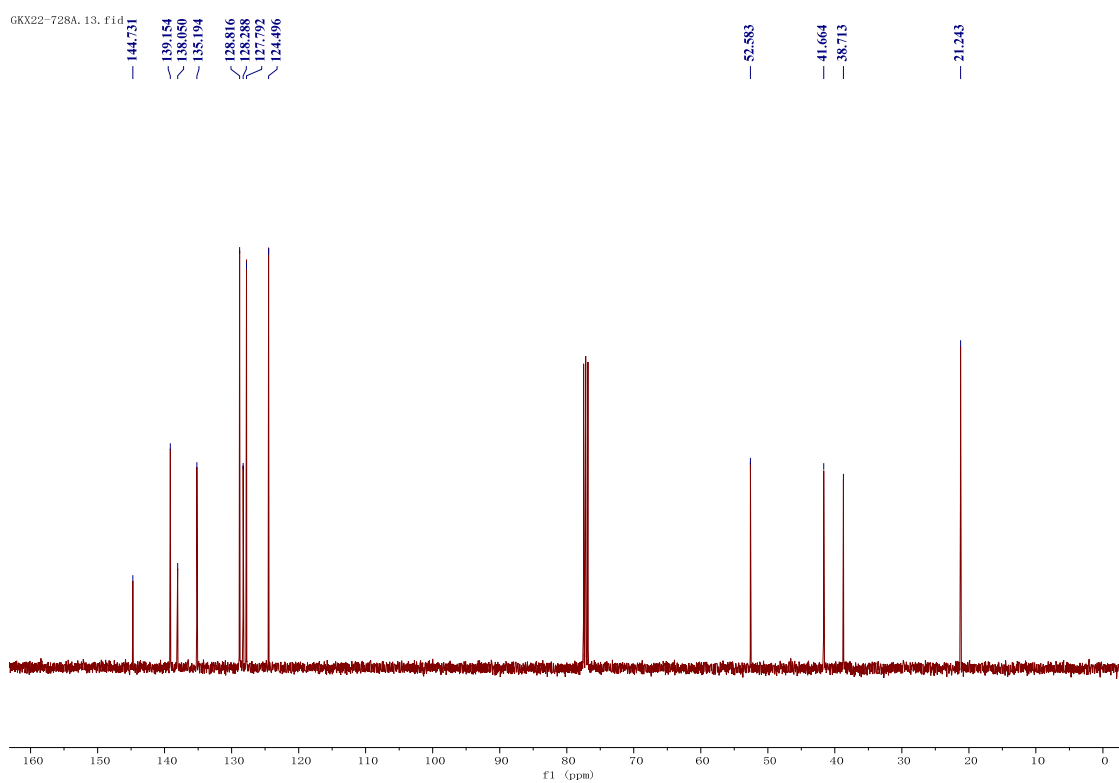

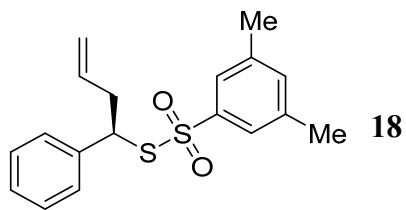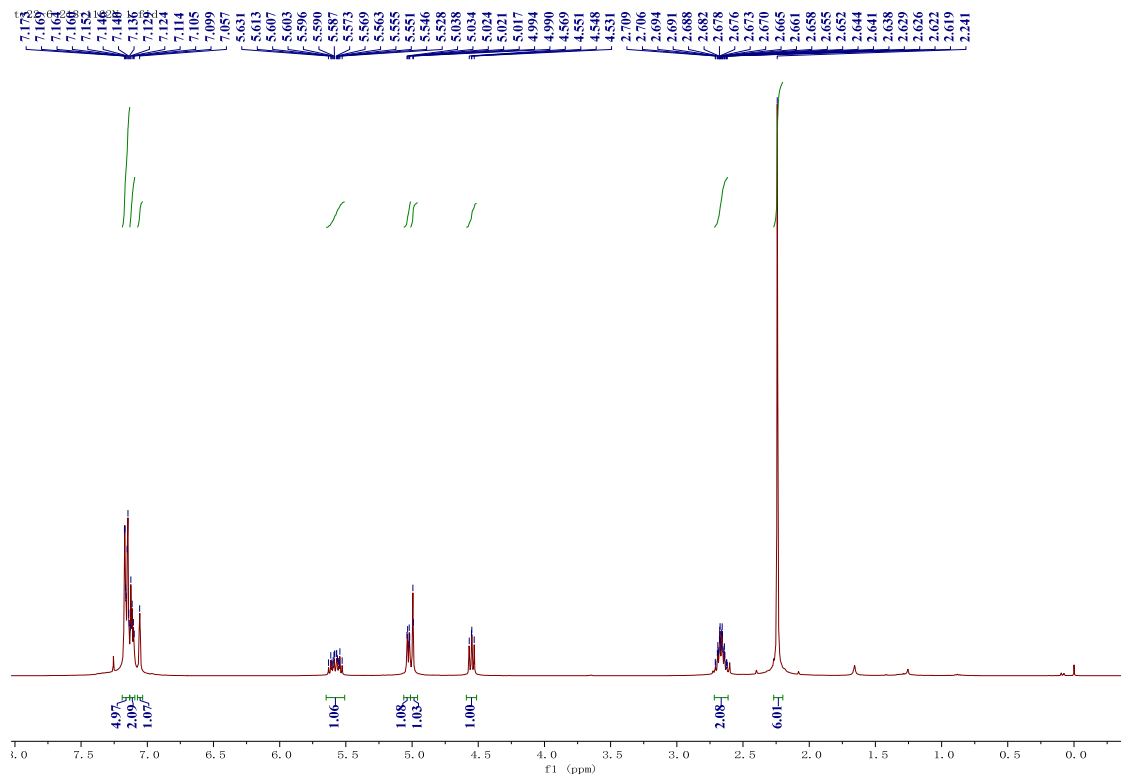

ty22-6-218-1162N, 130cid

145.004  
 138.947  
 138.906  
 138.829  
 135.458  
 128.383  
 127.889  
 127.824  
 124.301  
 118.644

55.518

40.754

21.194

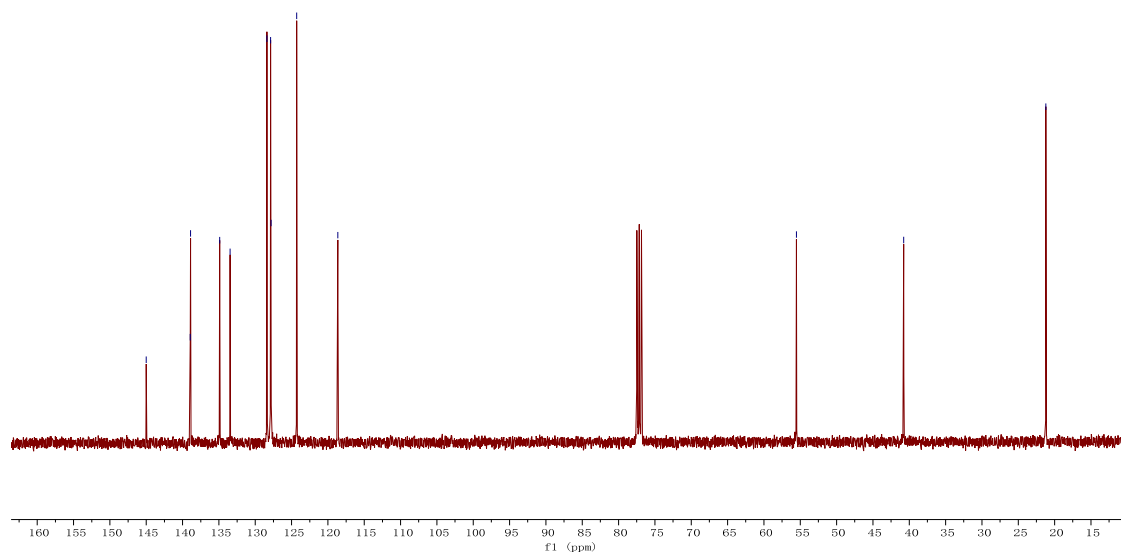

S273

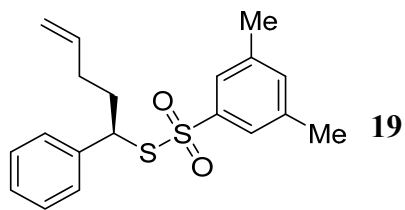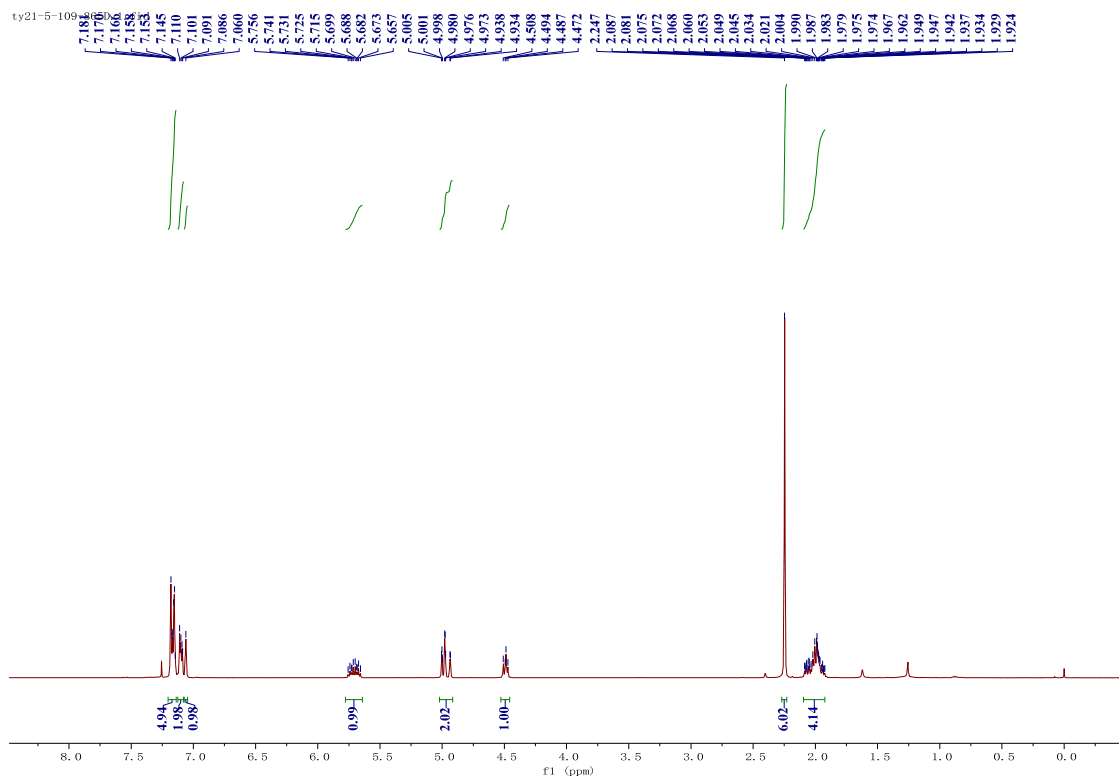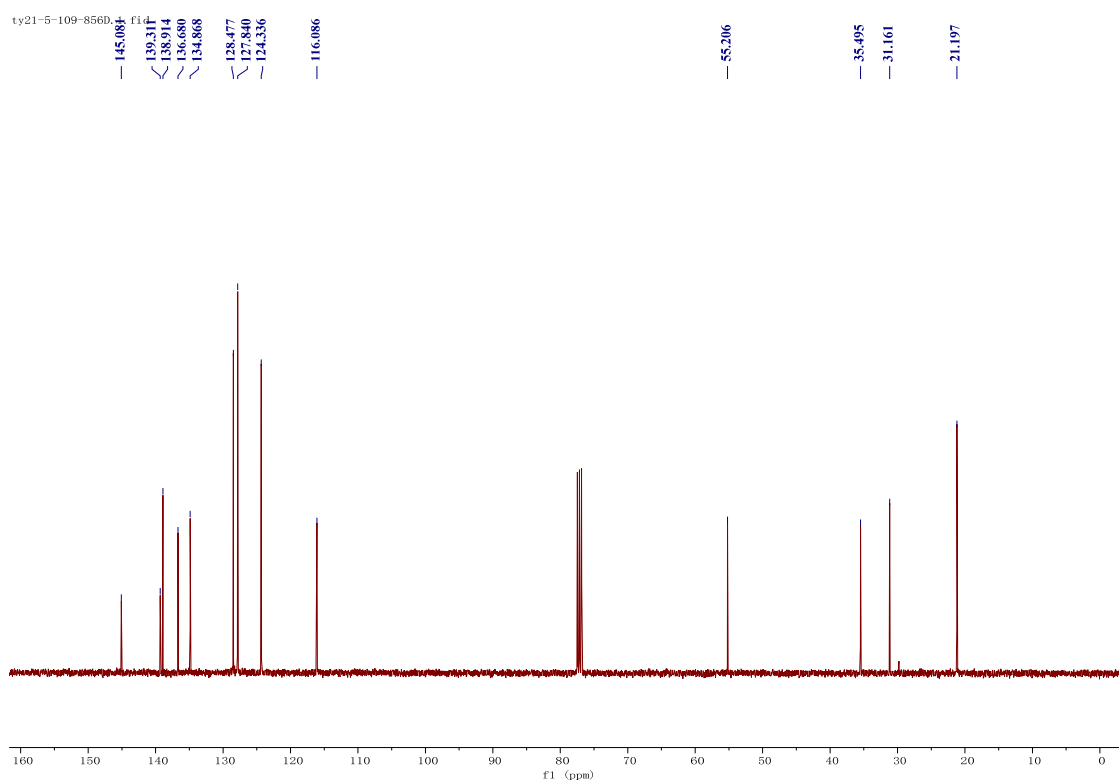

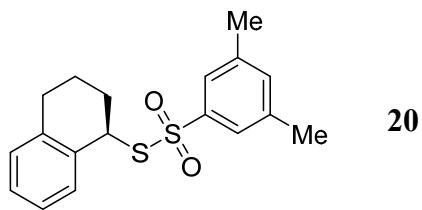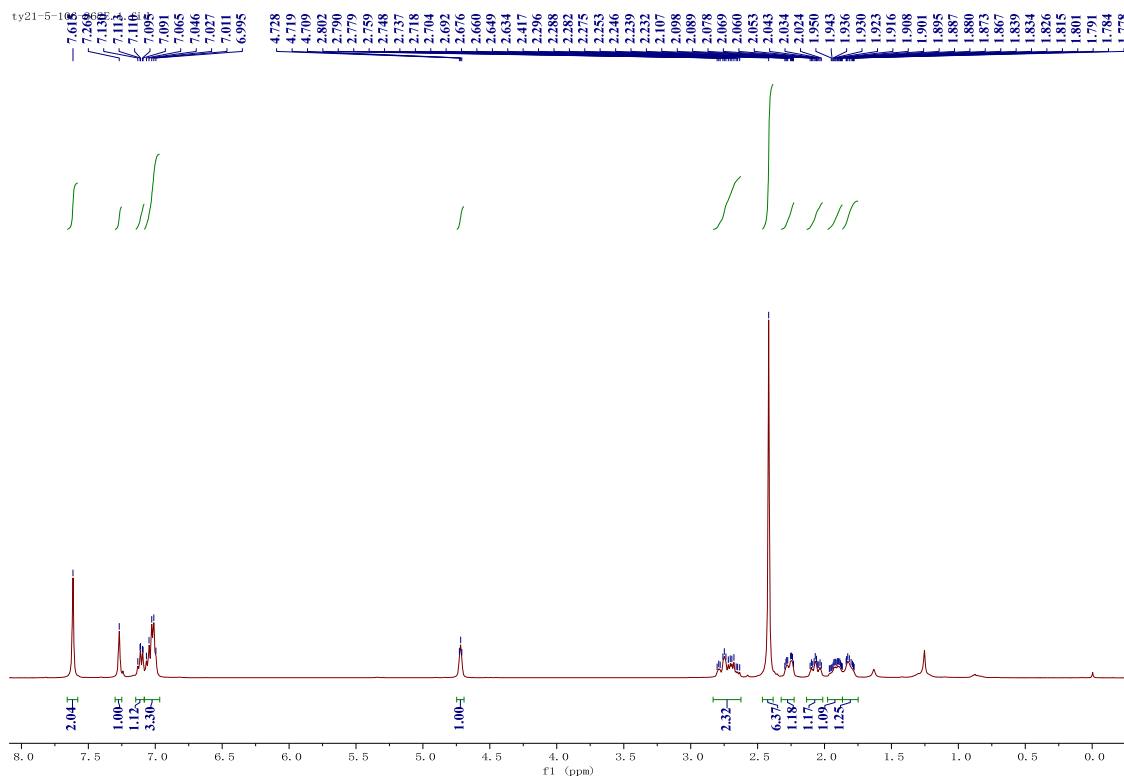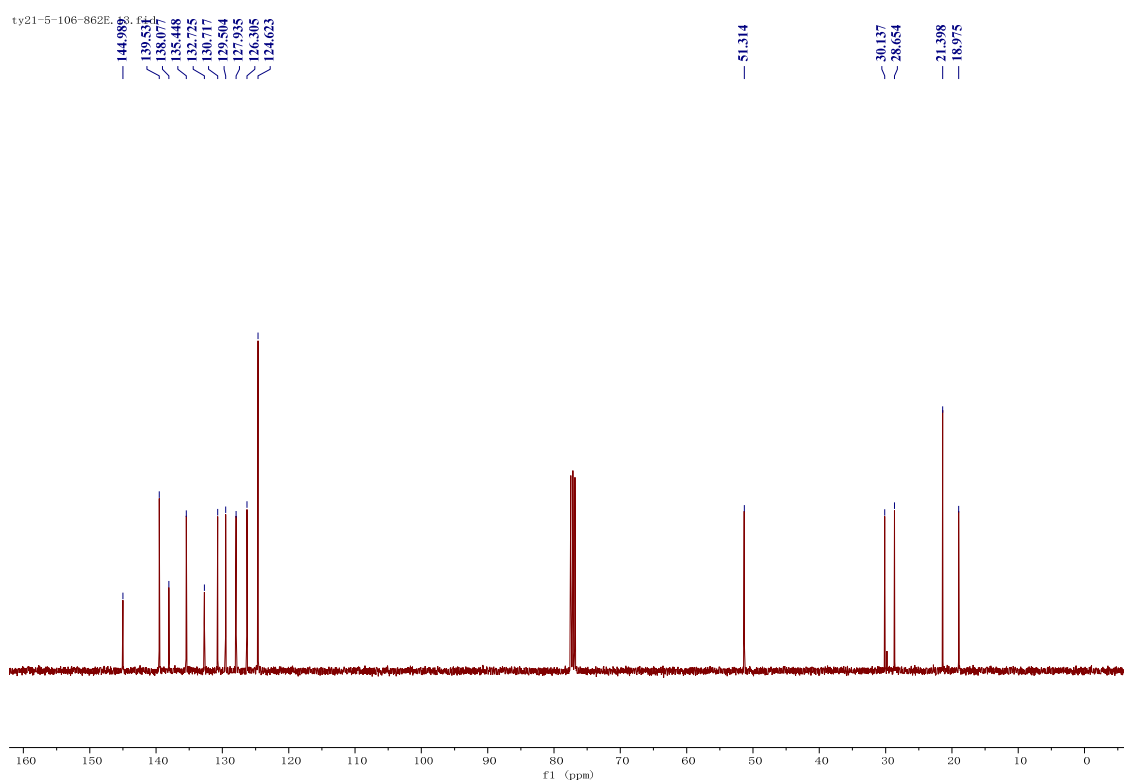

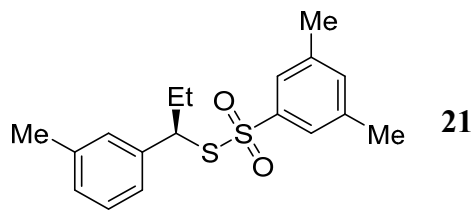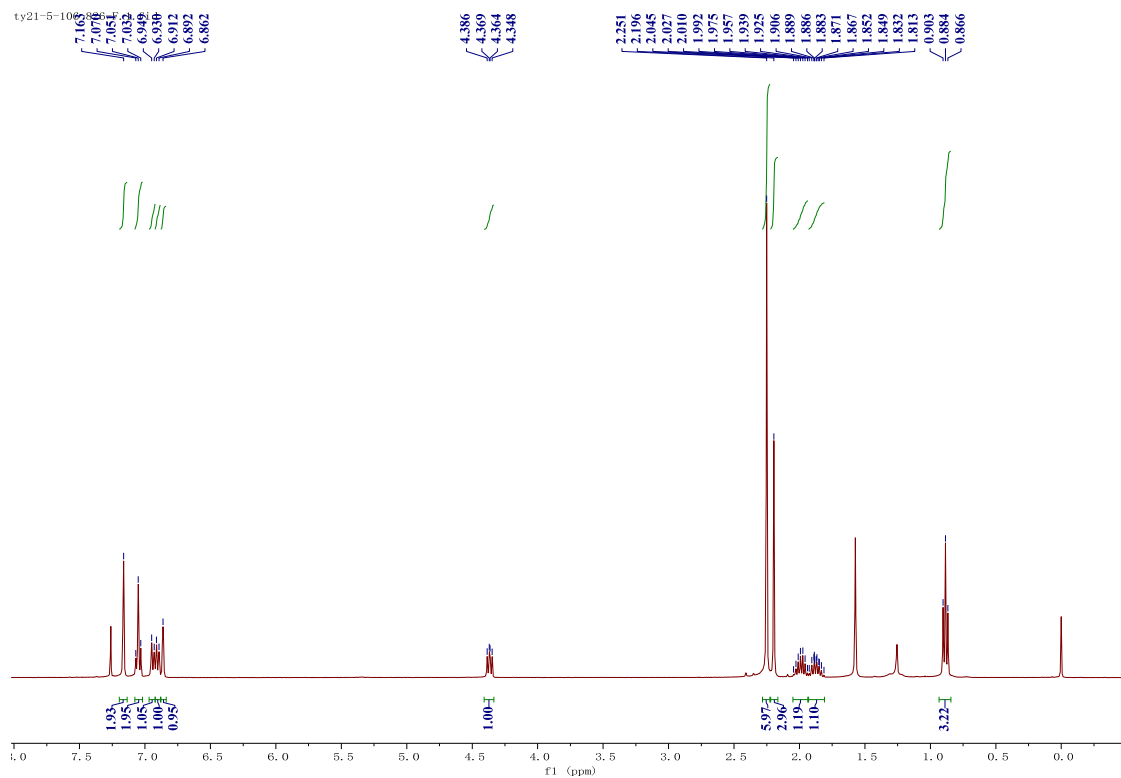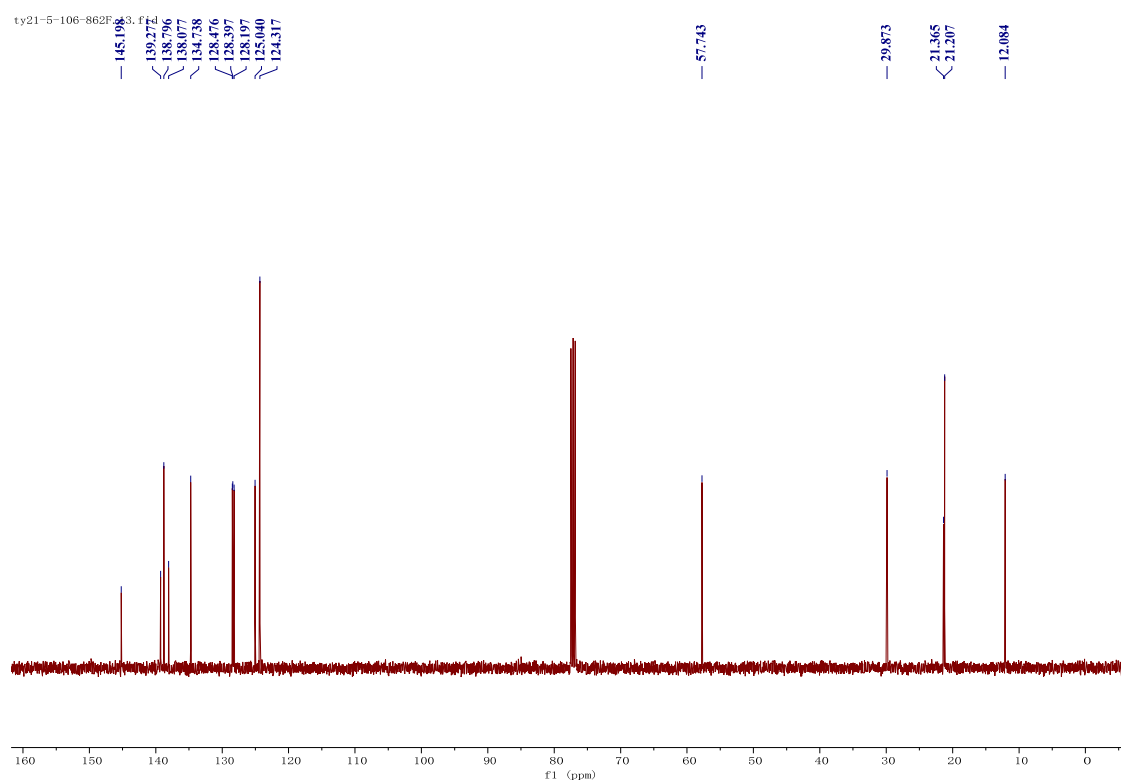

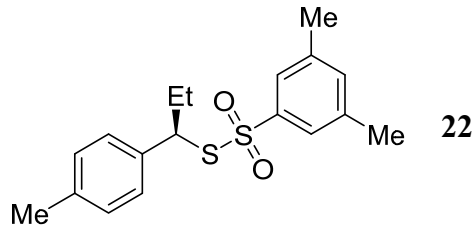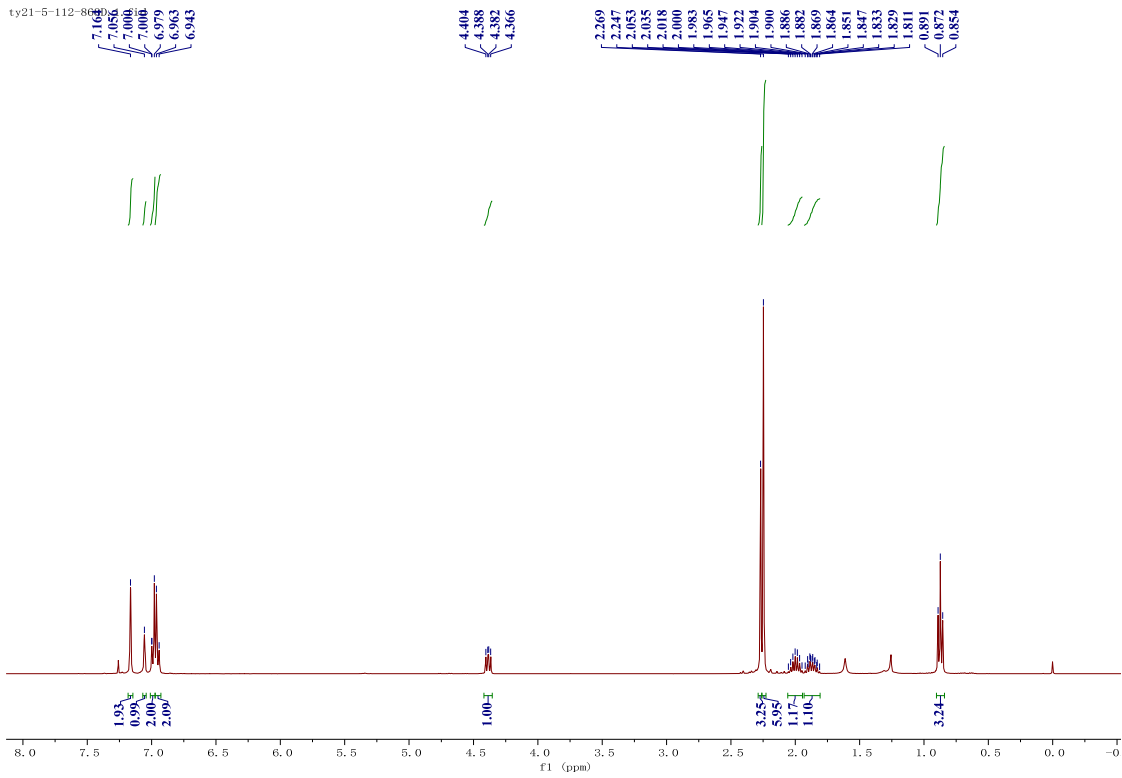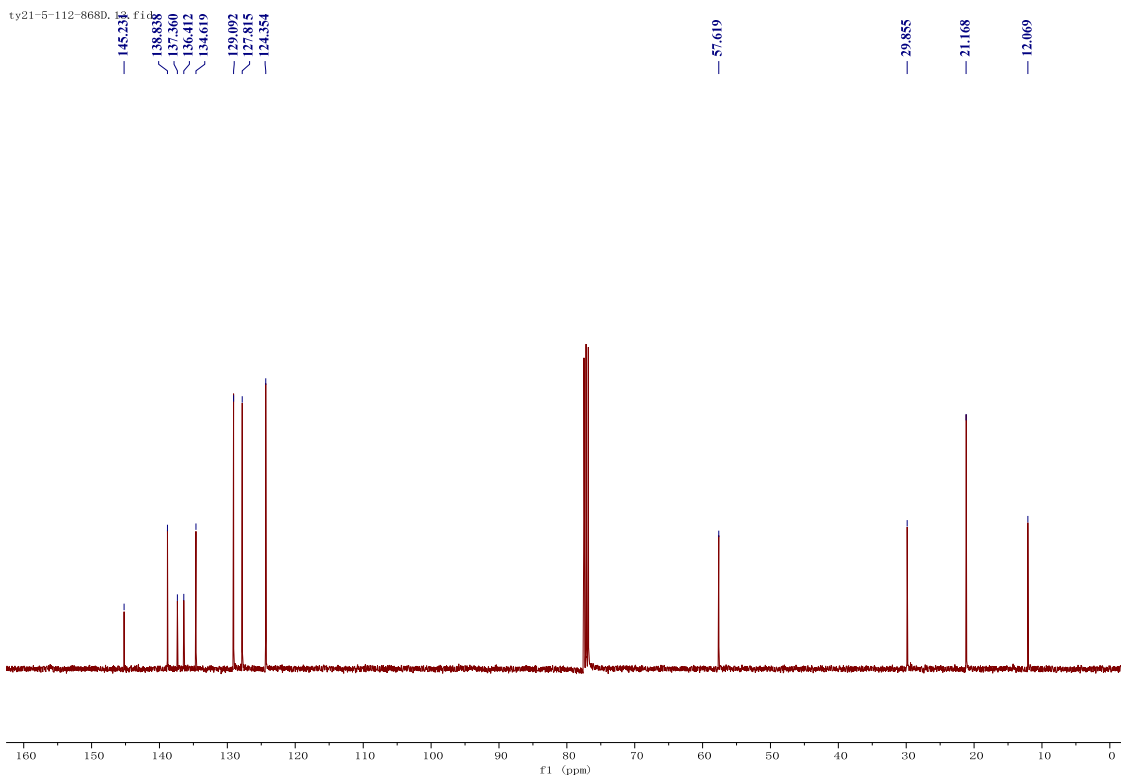

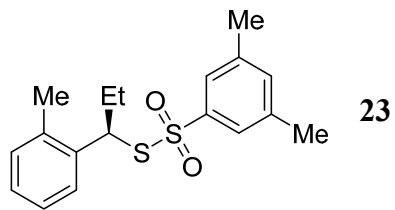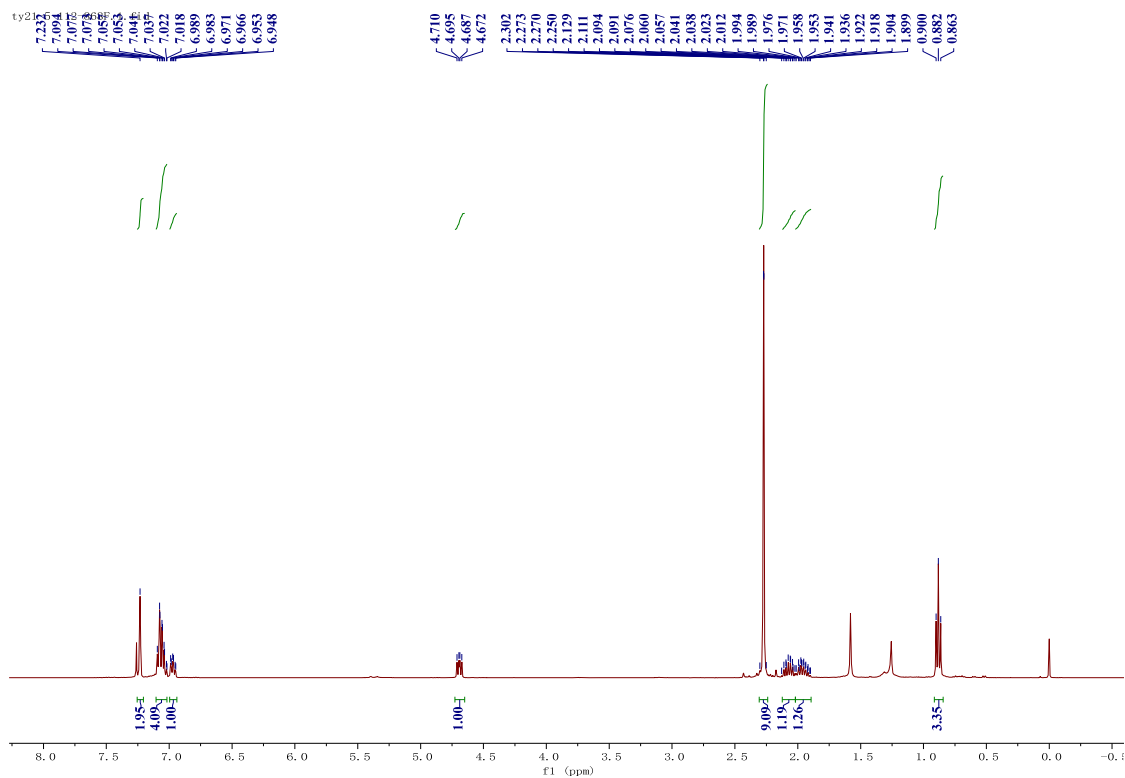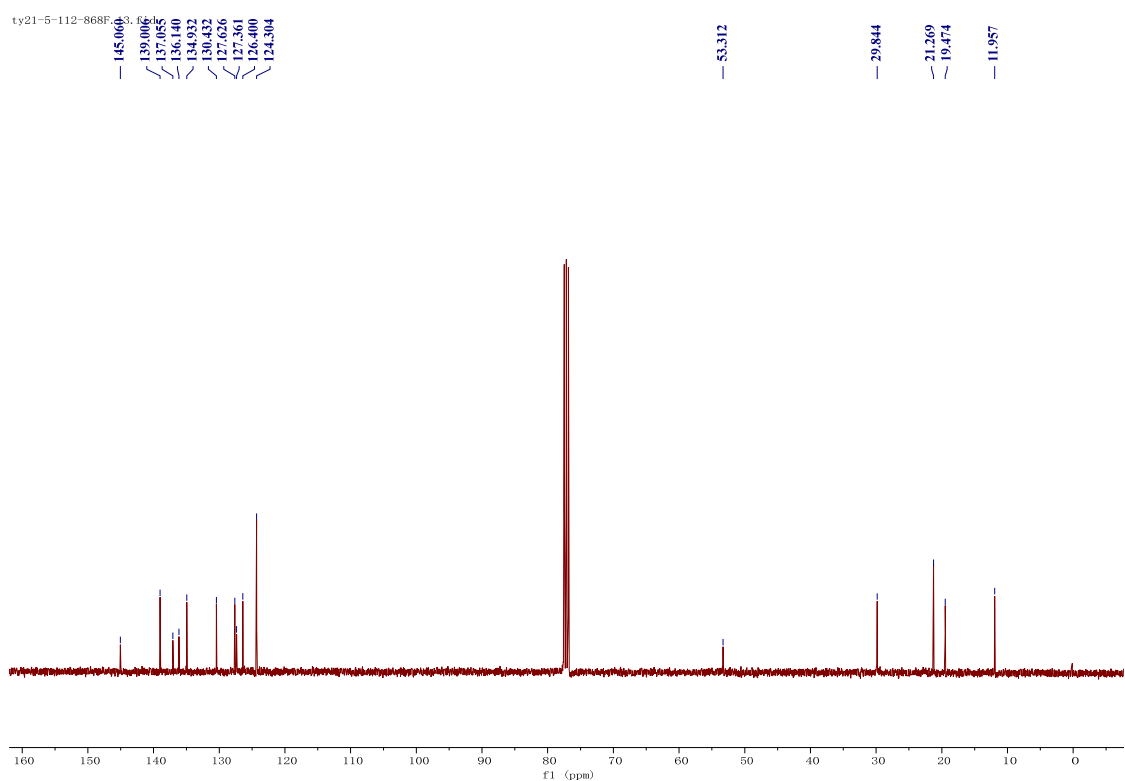

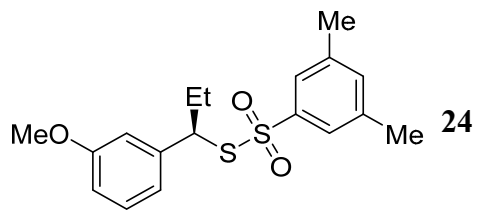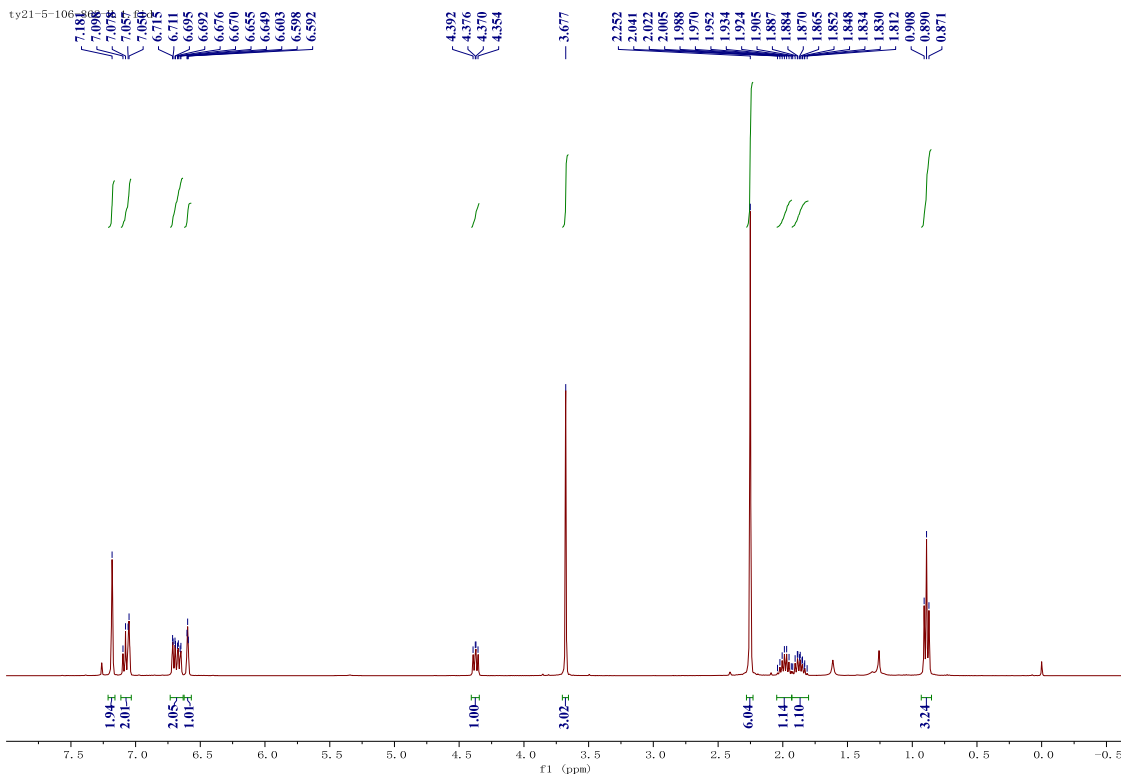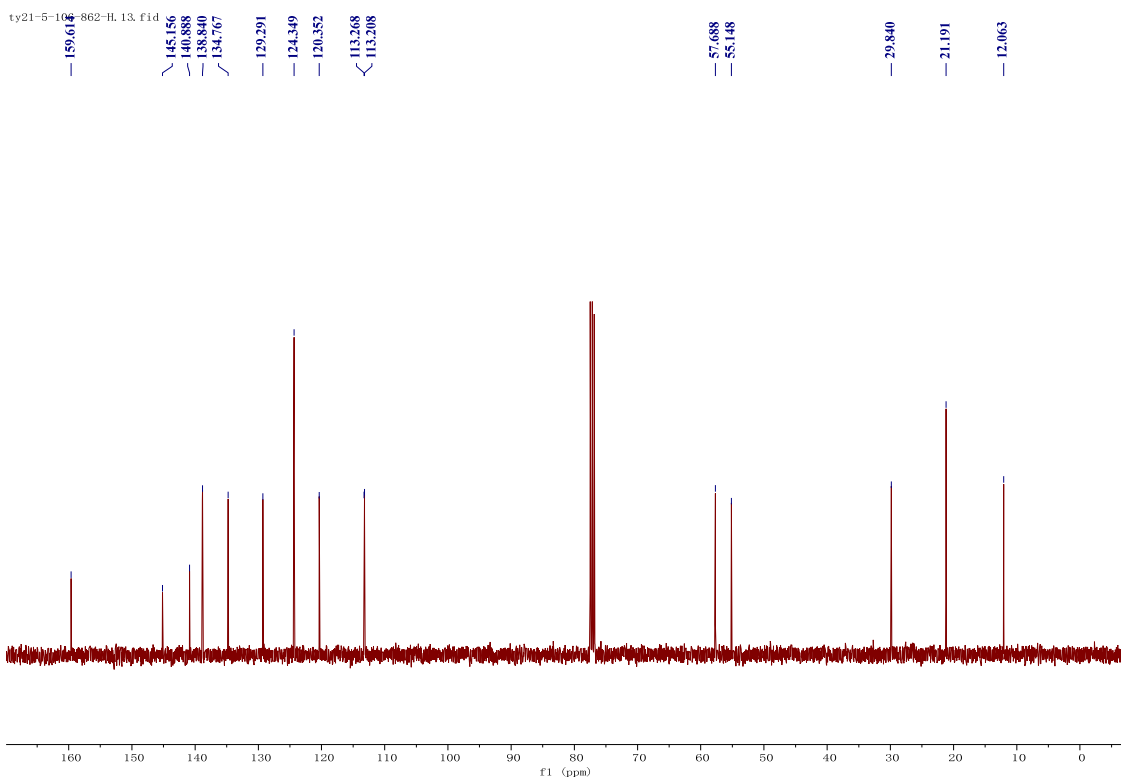



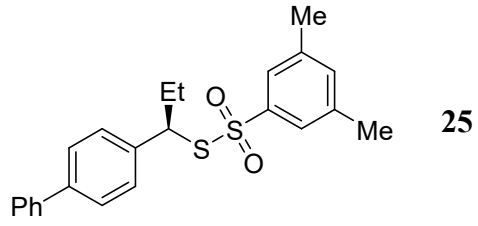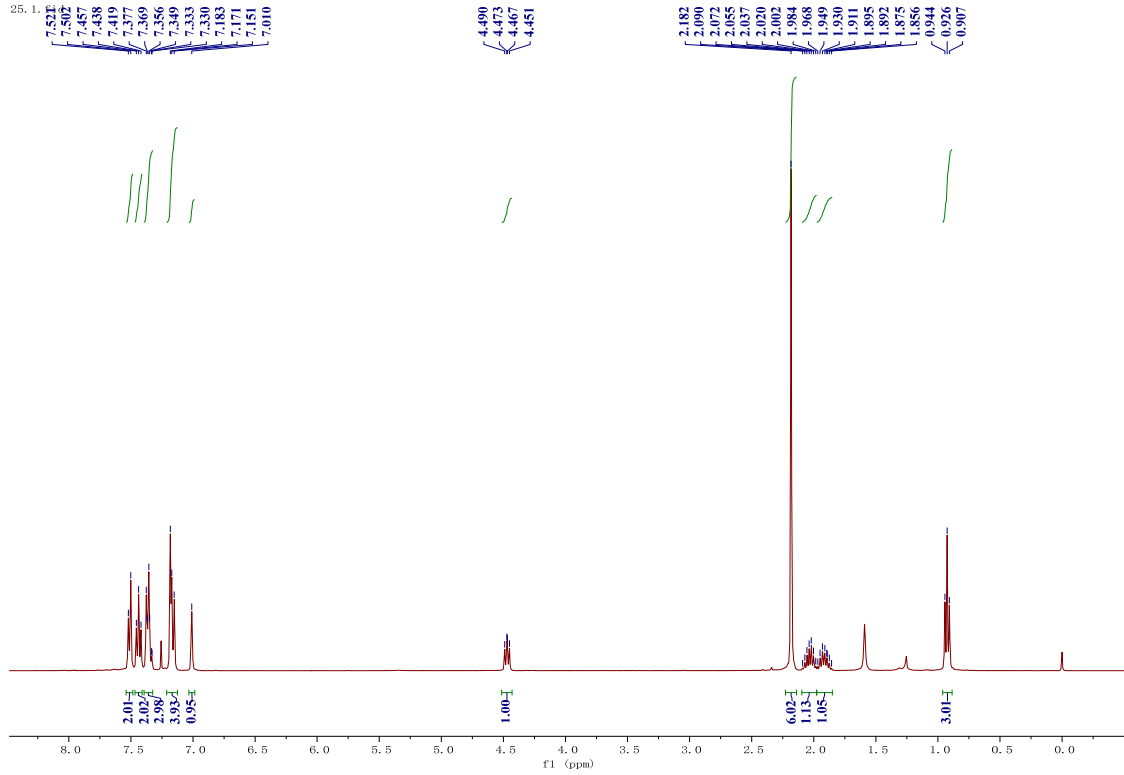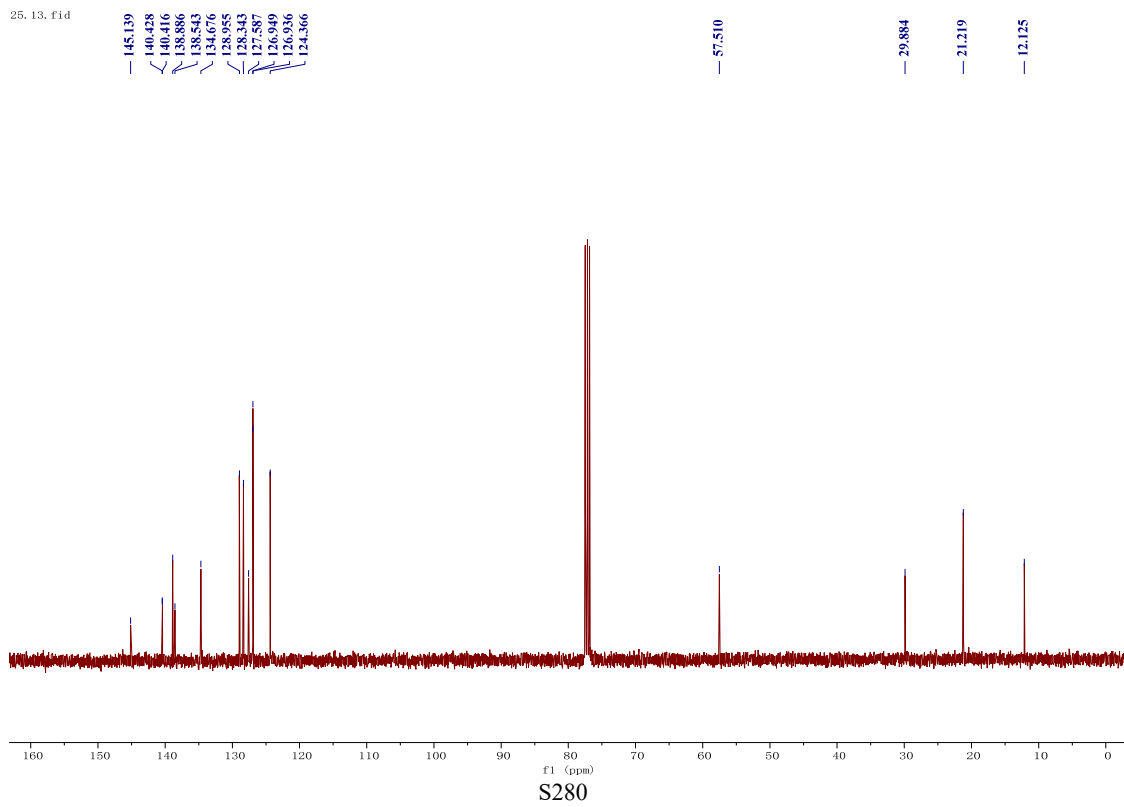

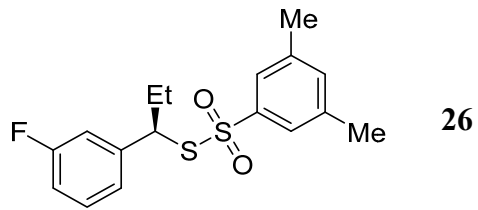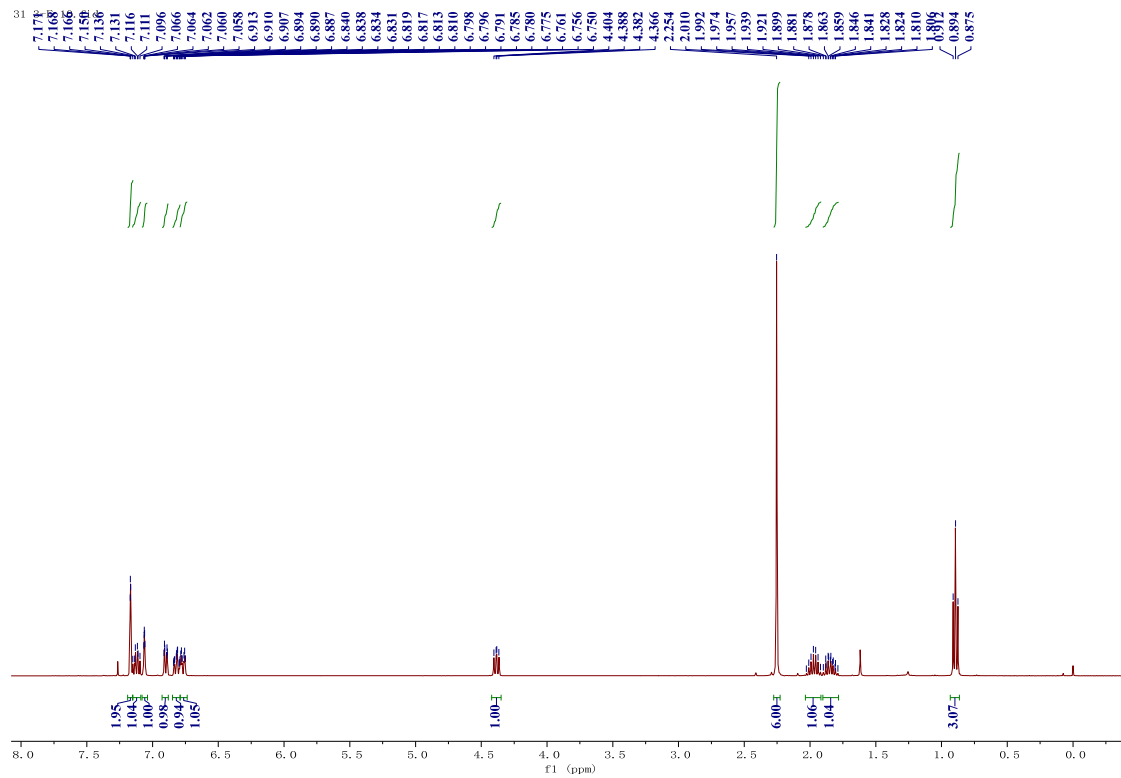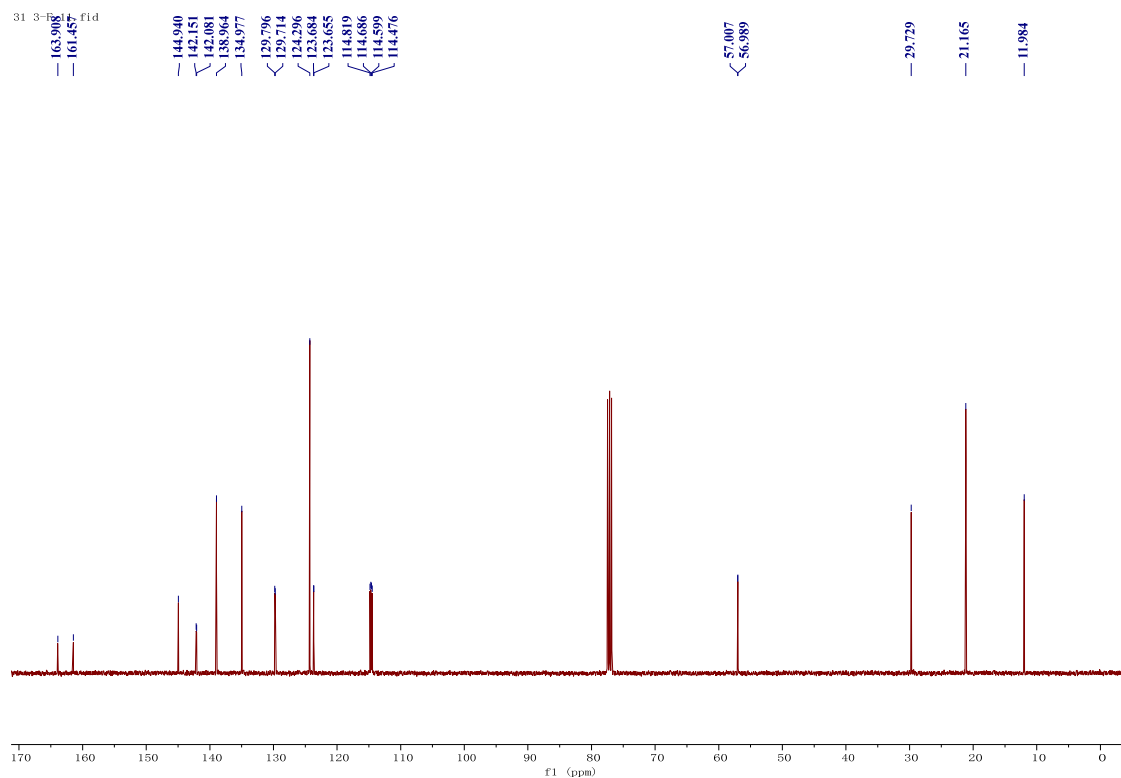

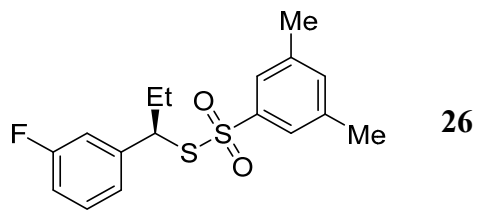

31 3-F.12. f1d

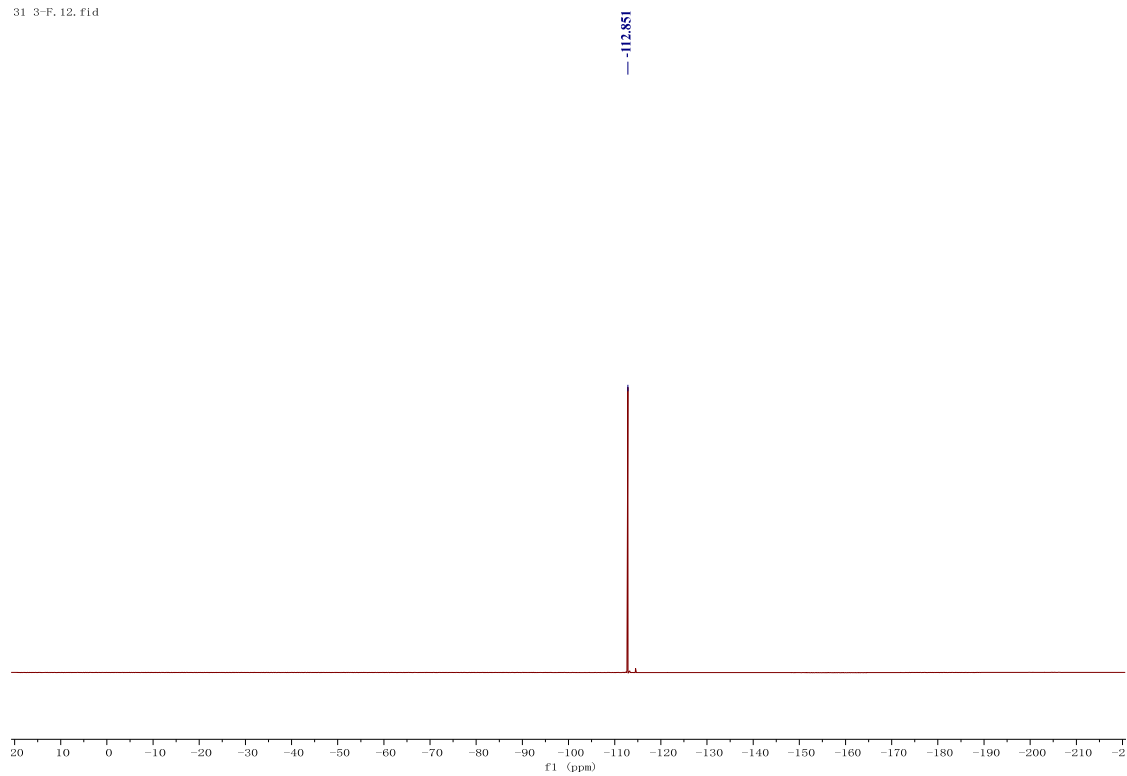

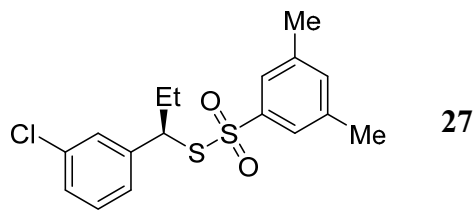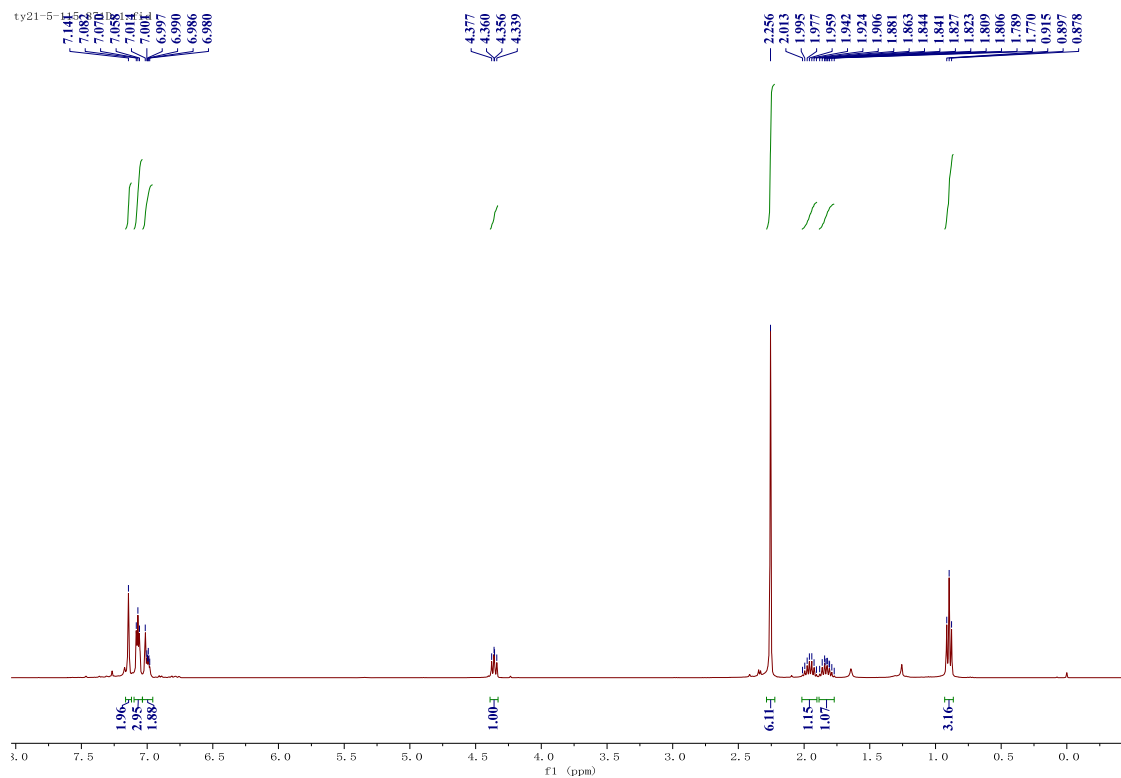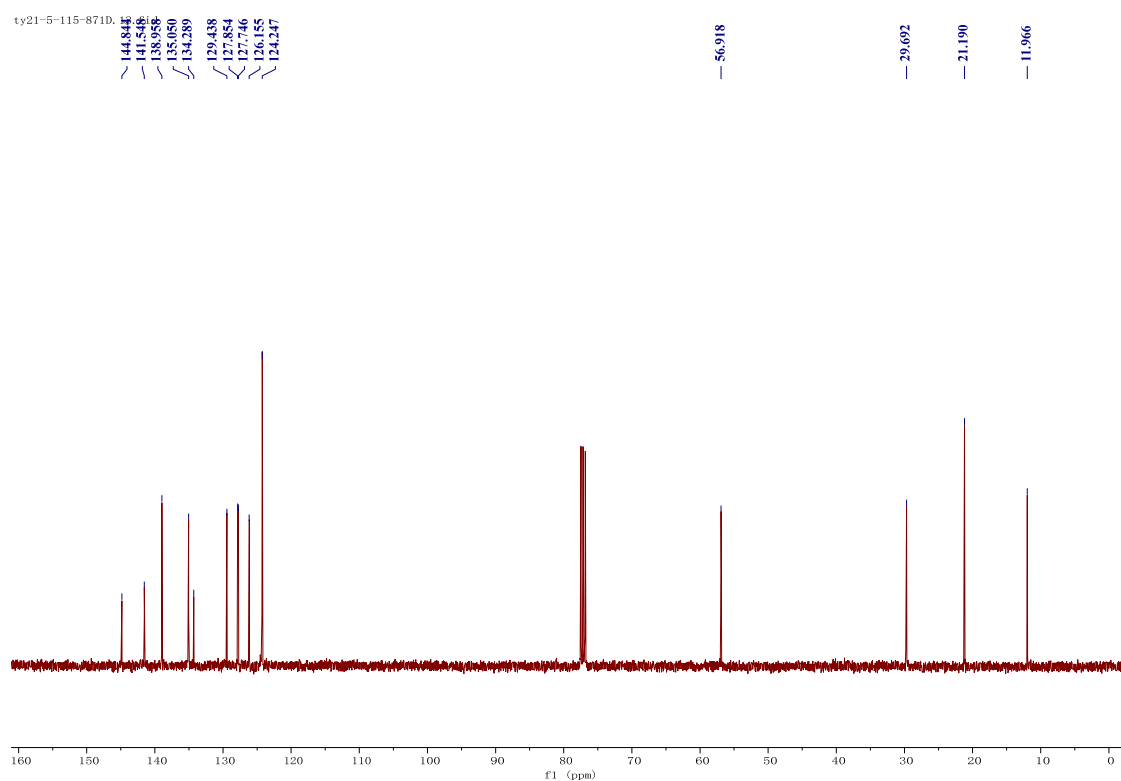

S283

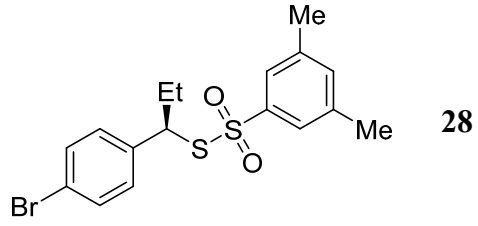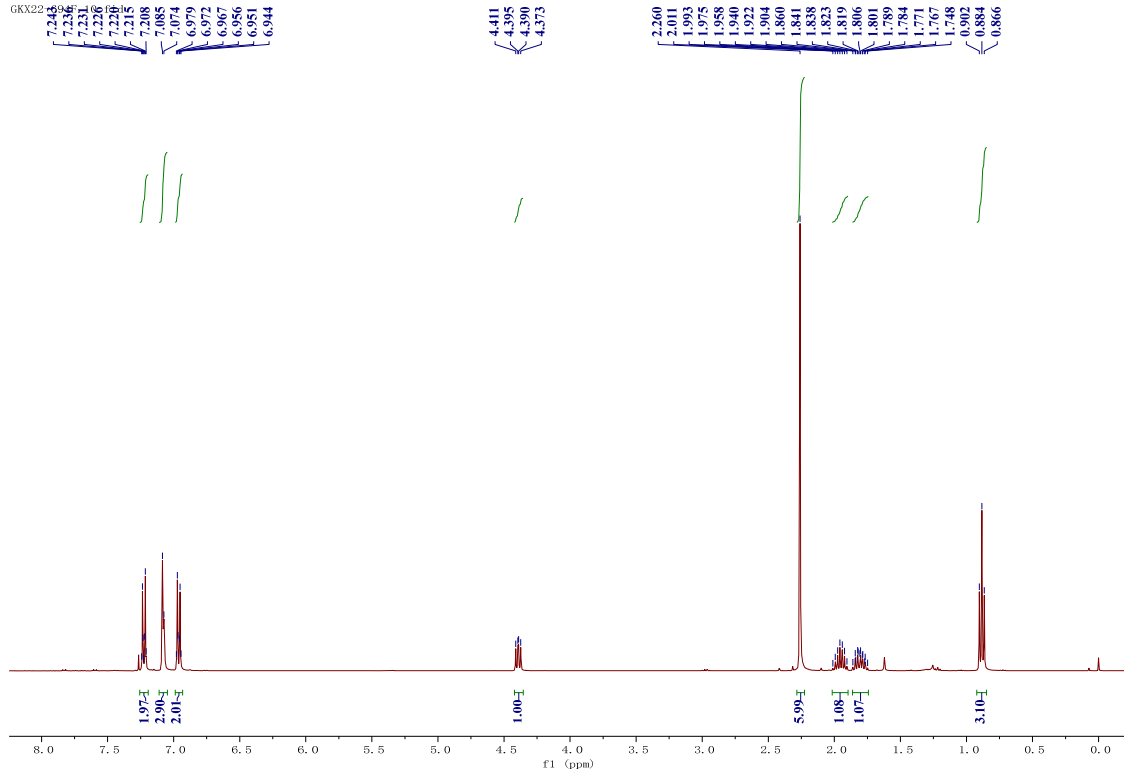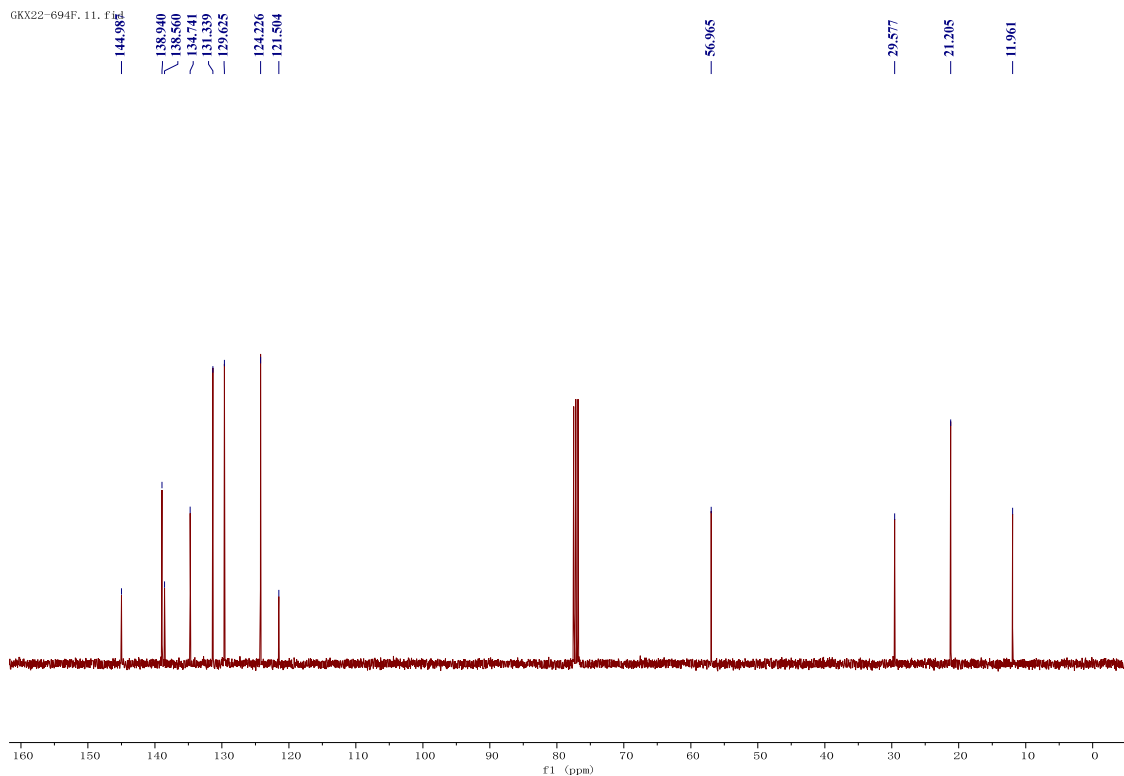

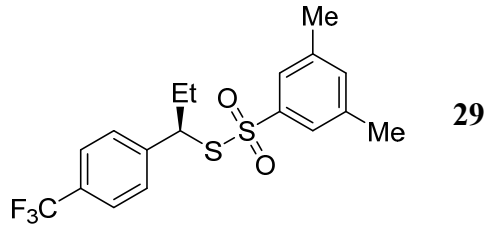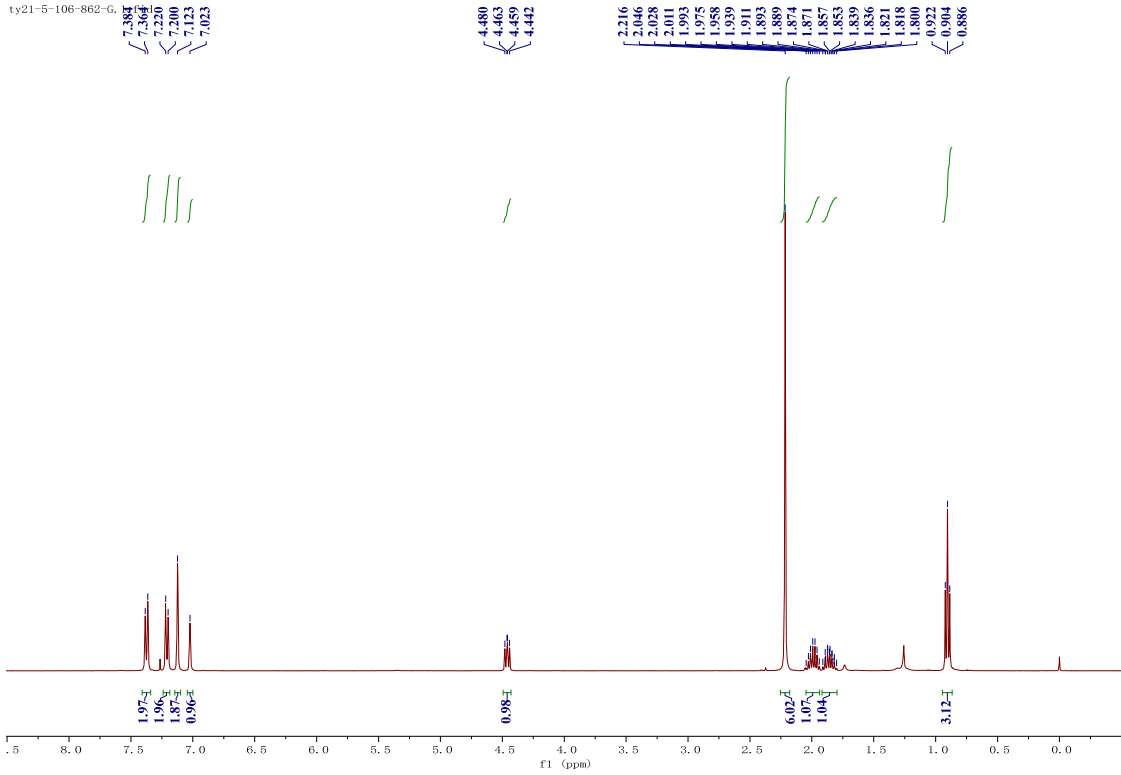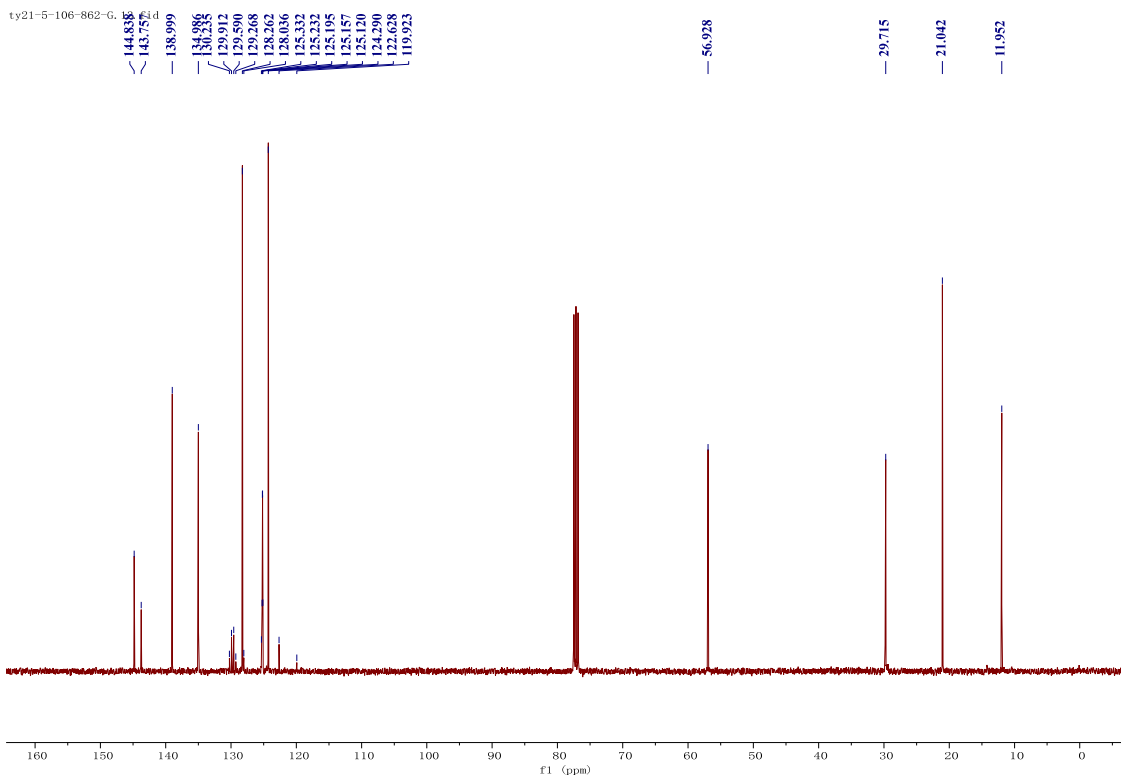

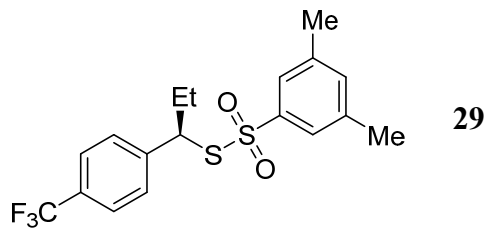

ty21-5-106-826G.19.fid

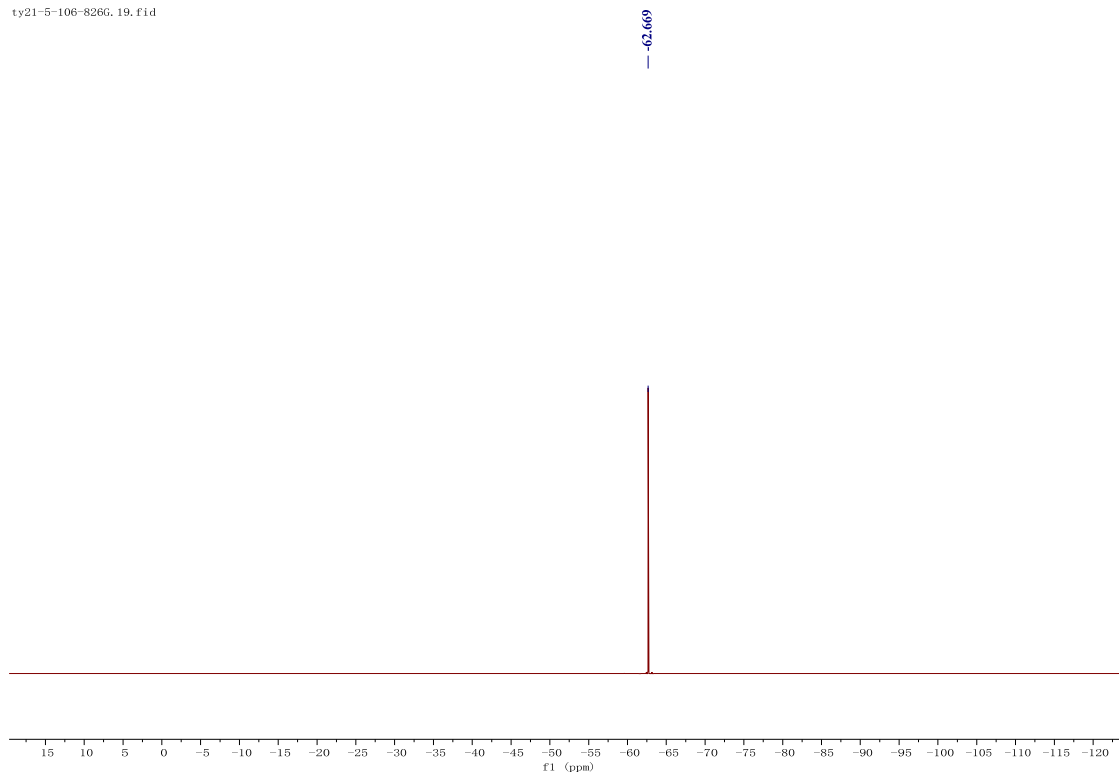

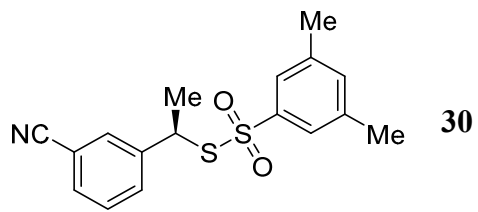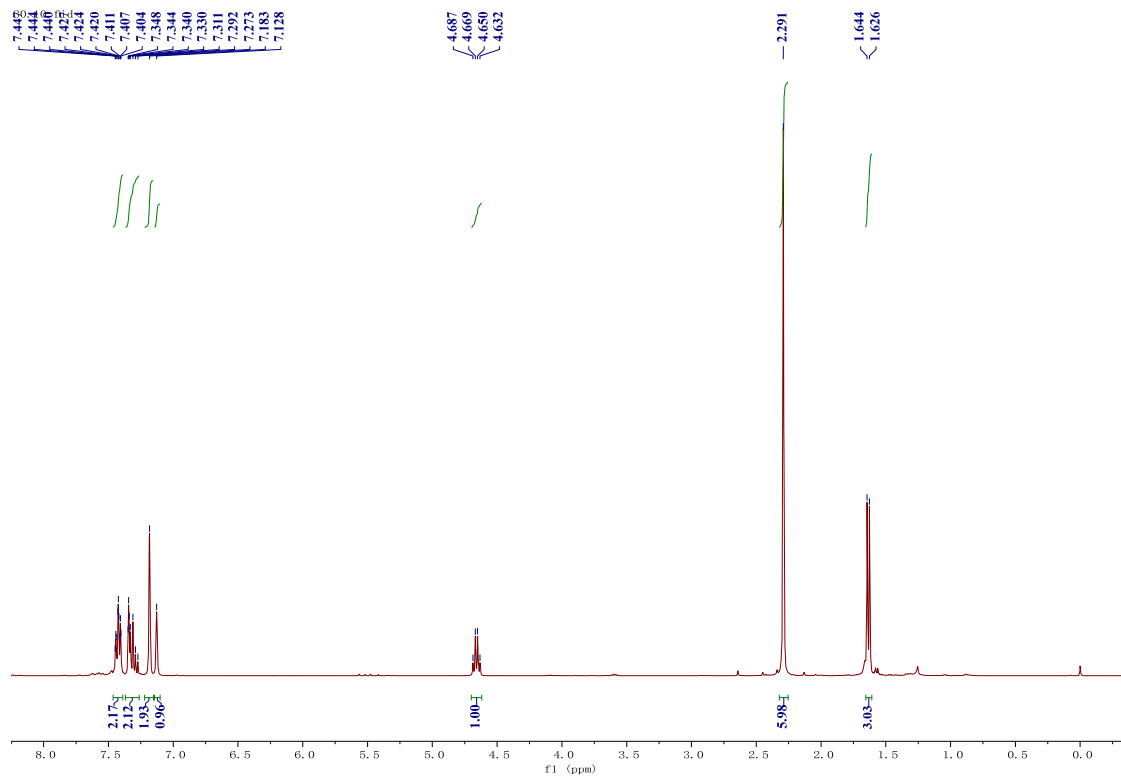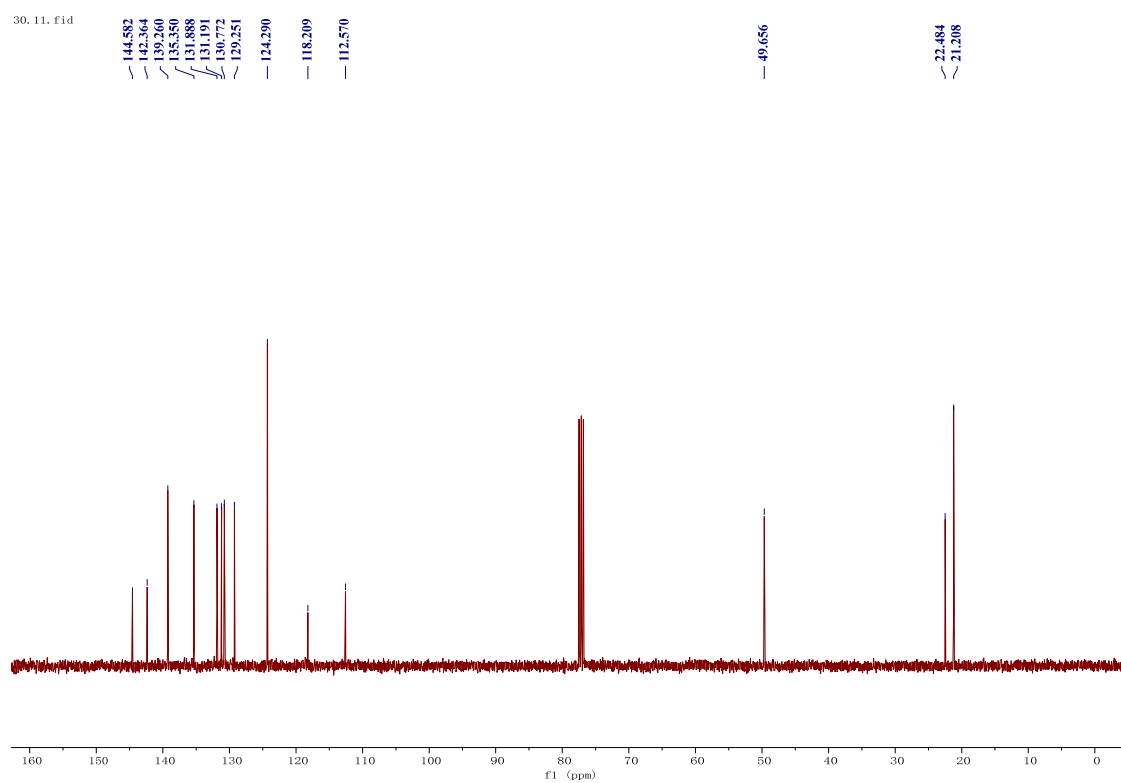



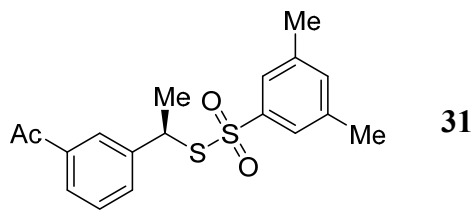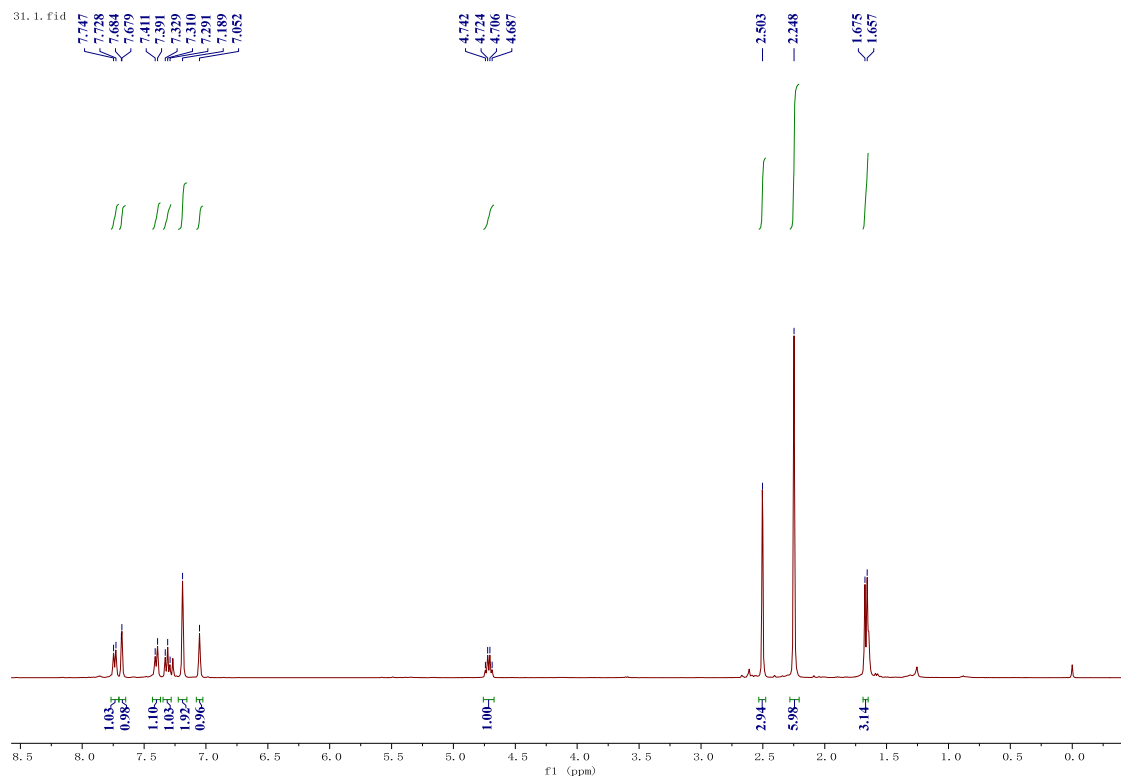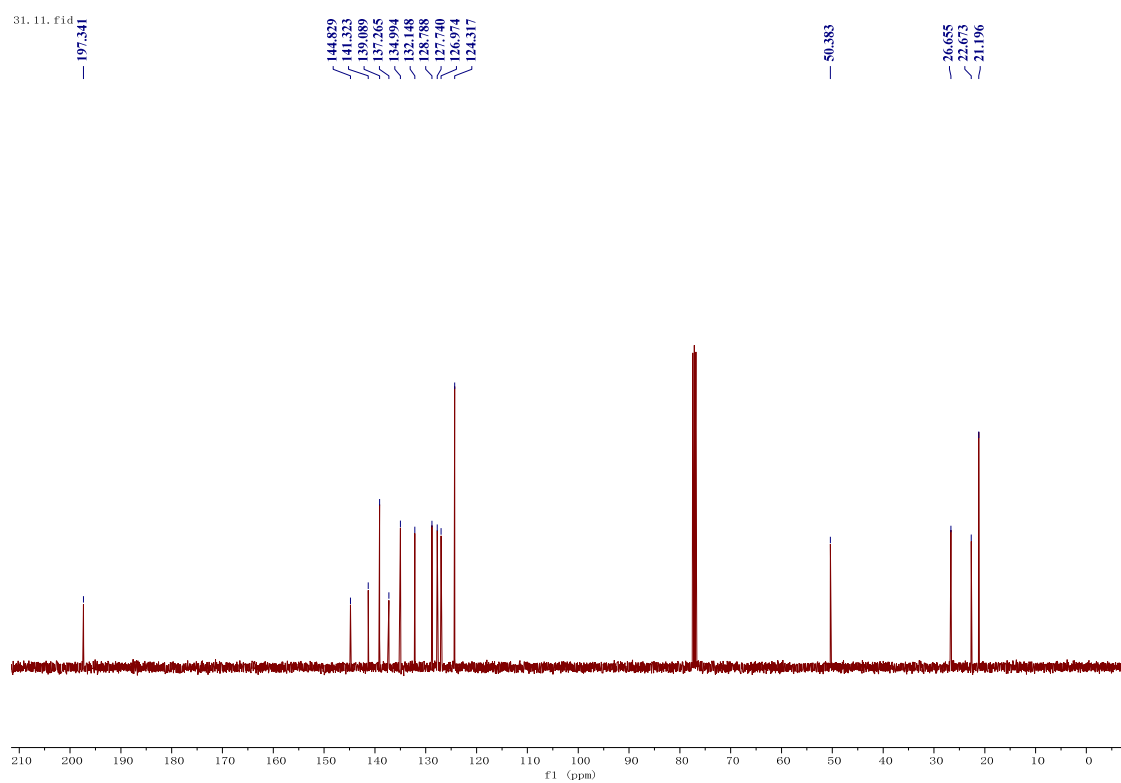

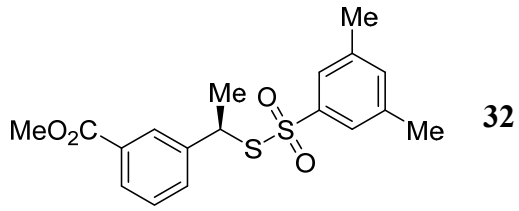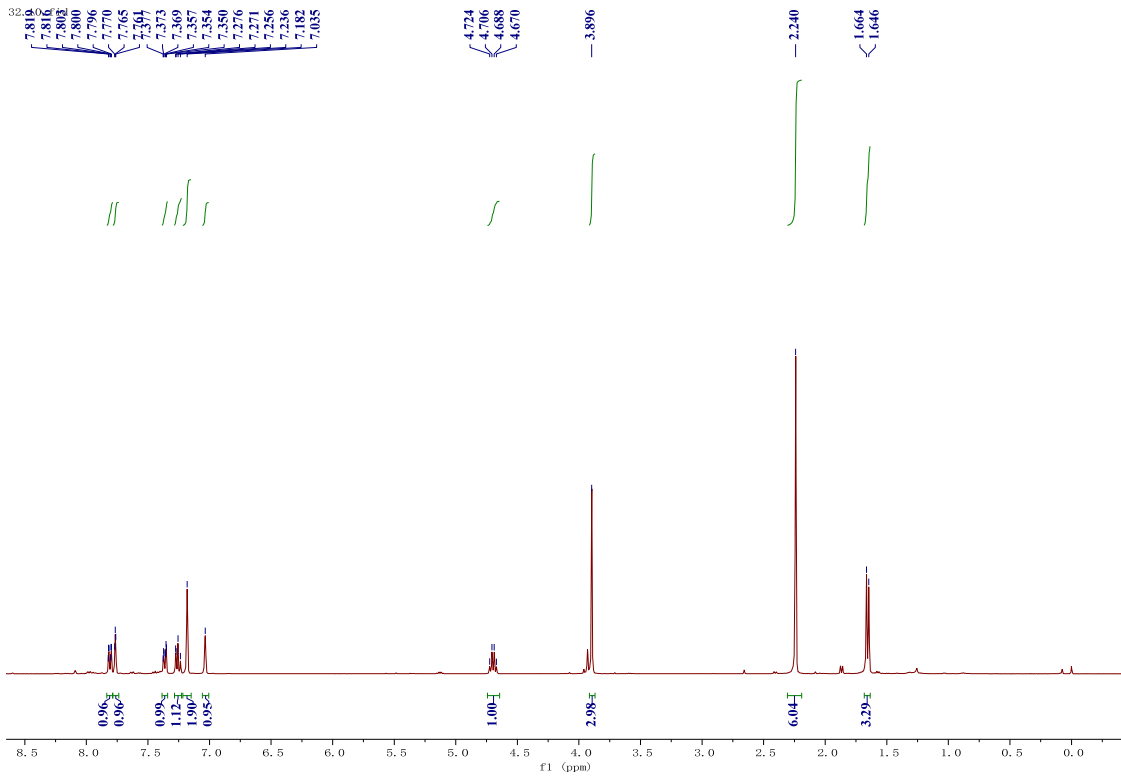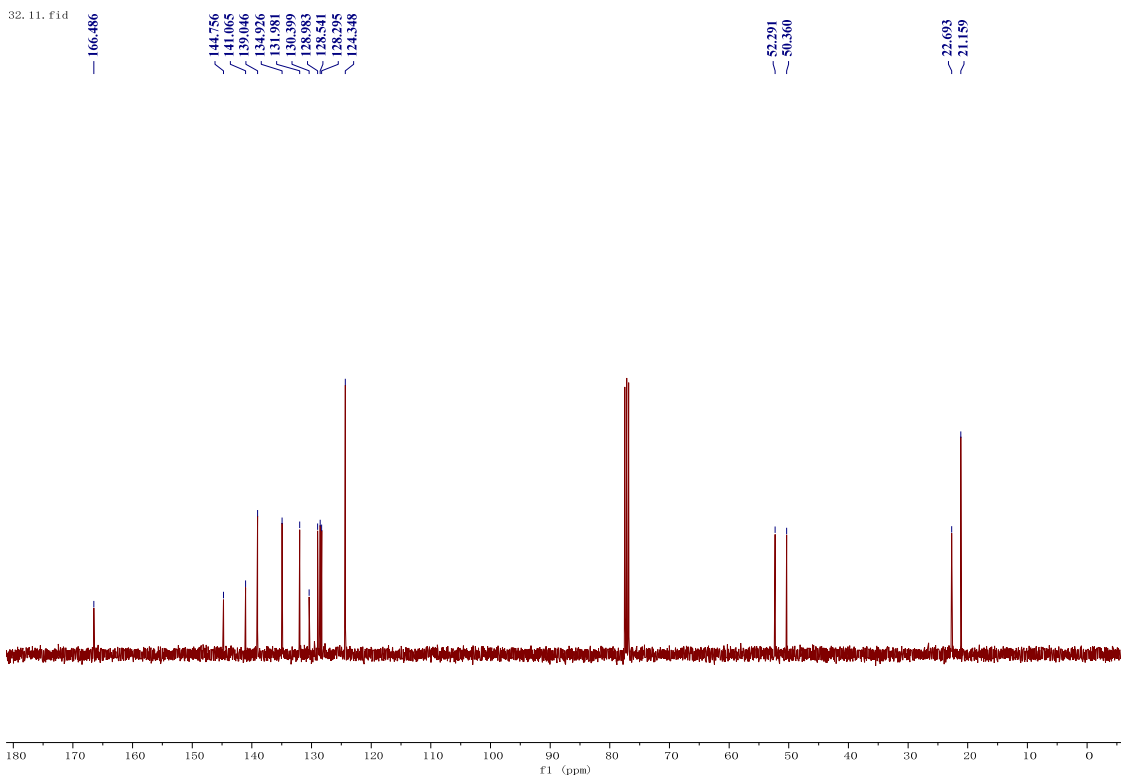

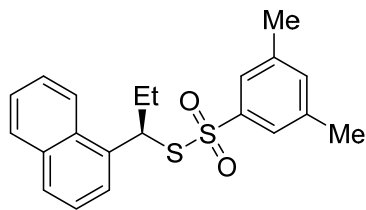

33

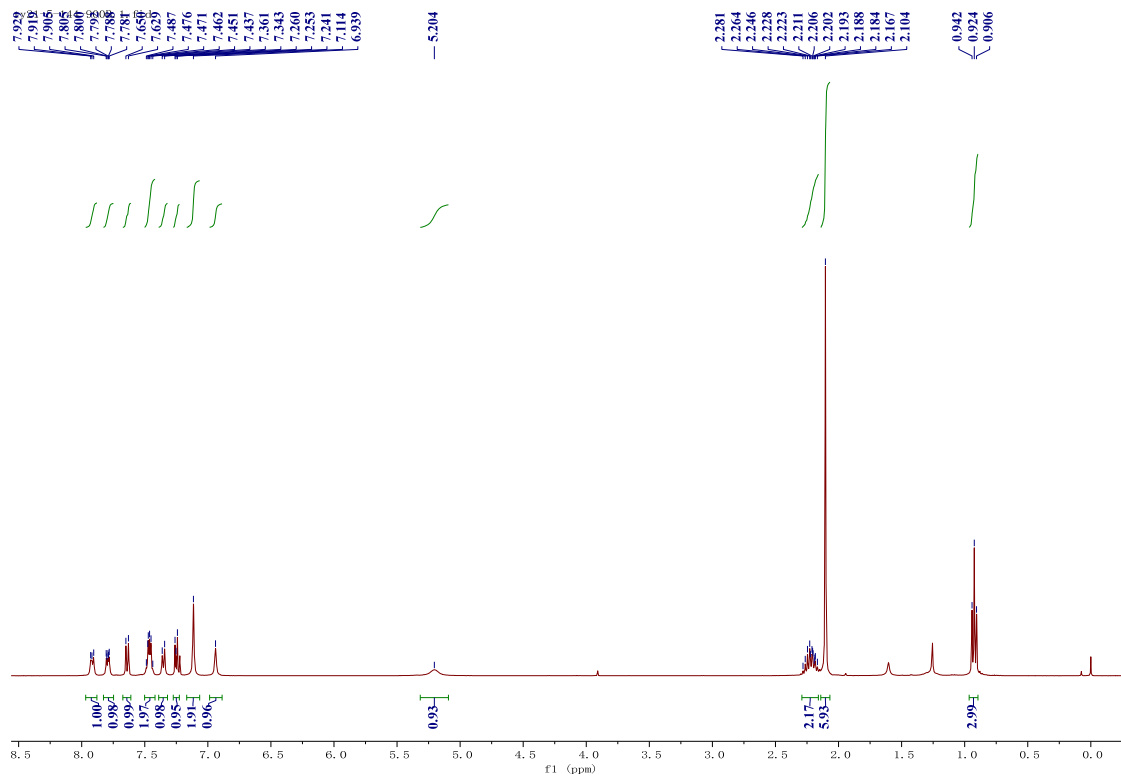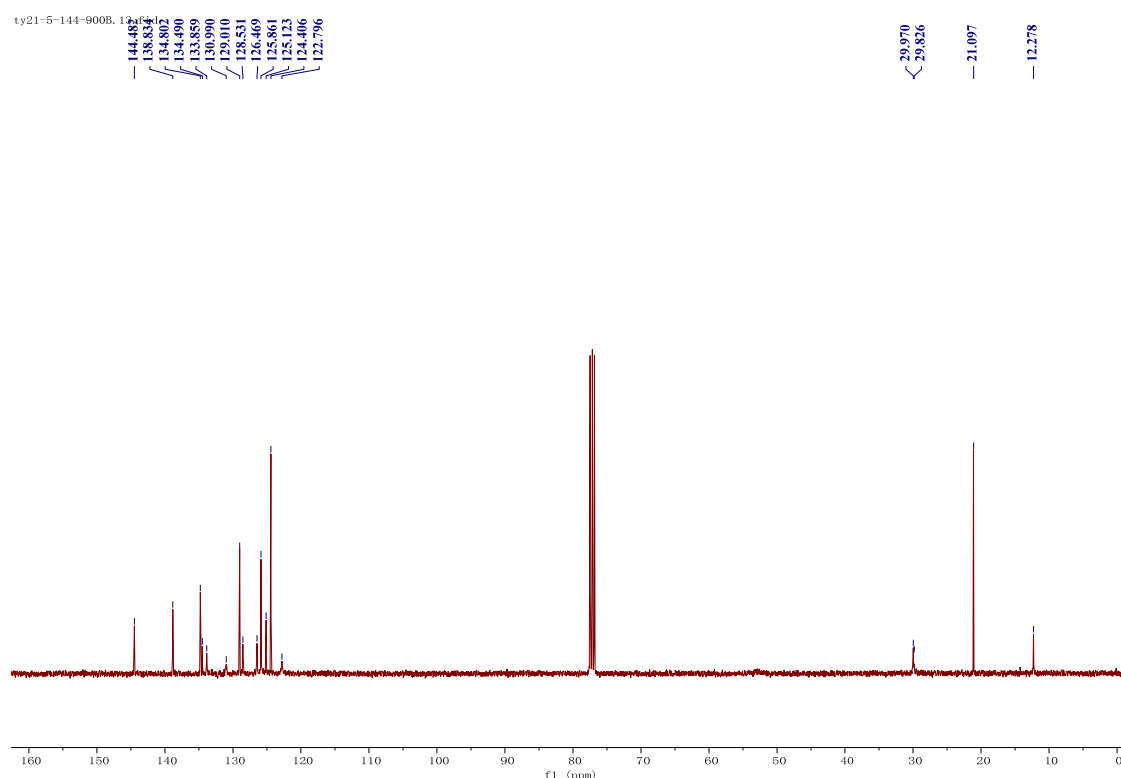

S290

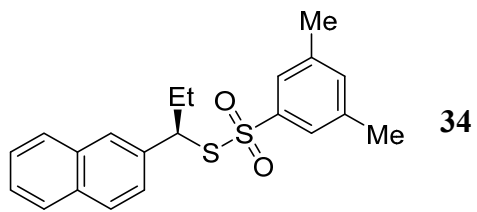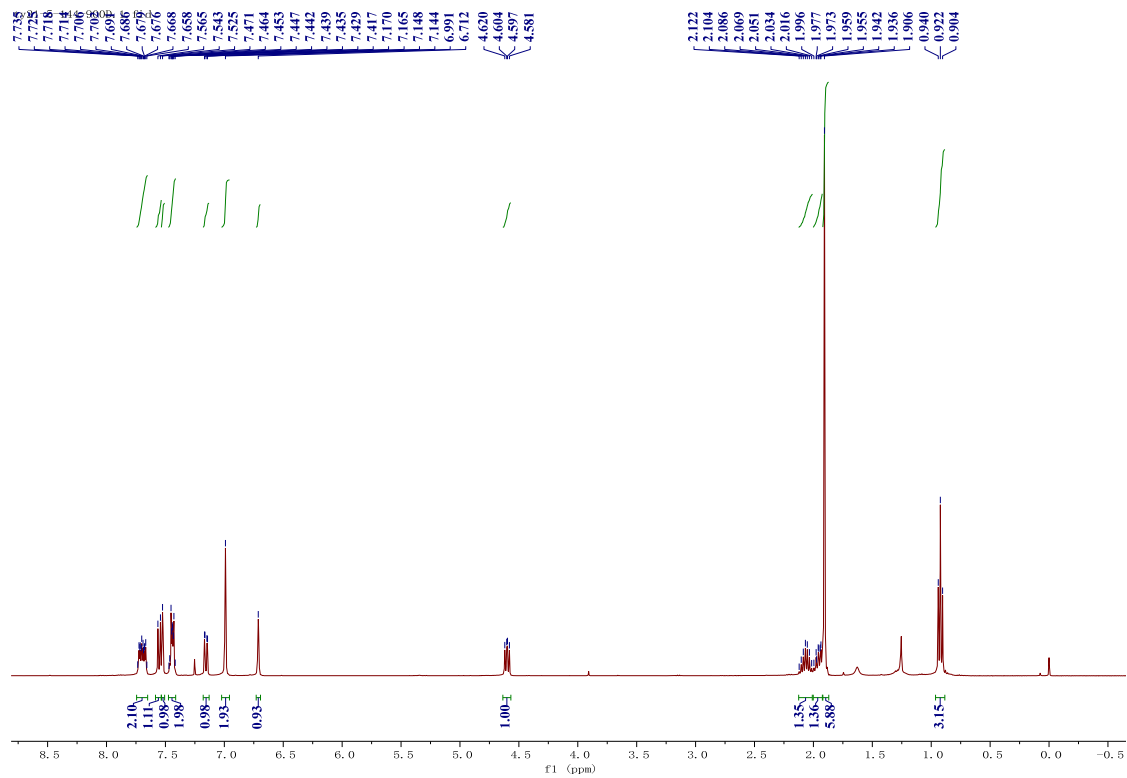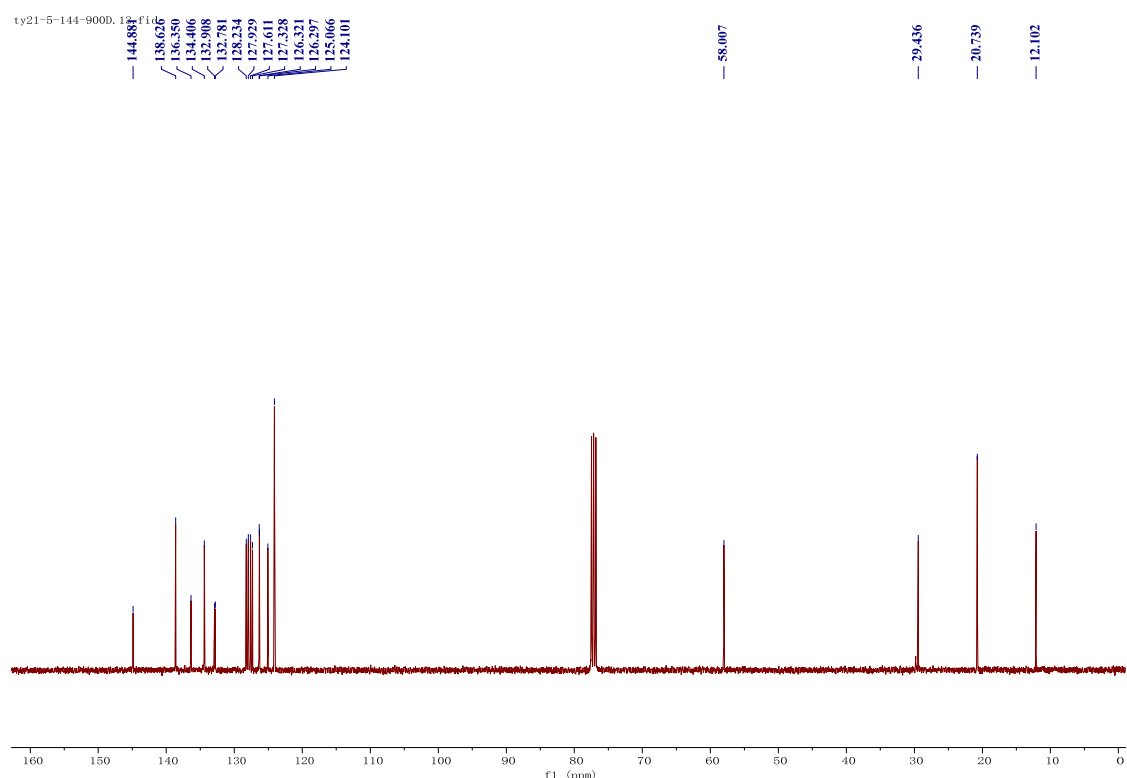

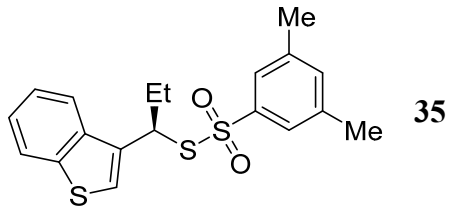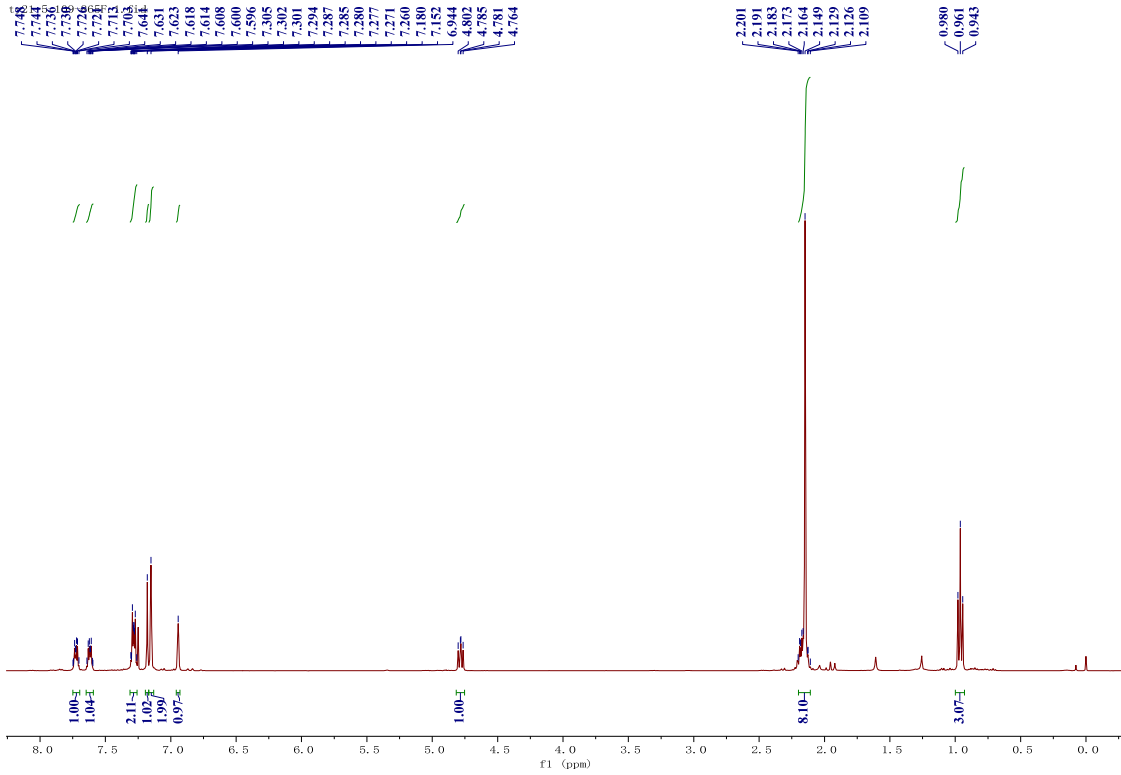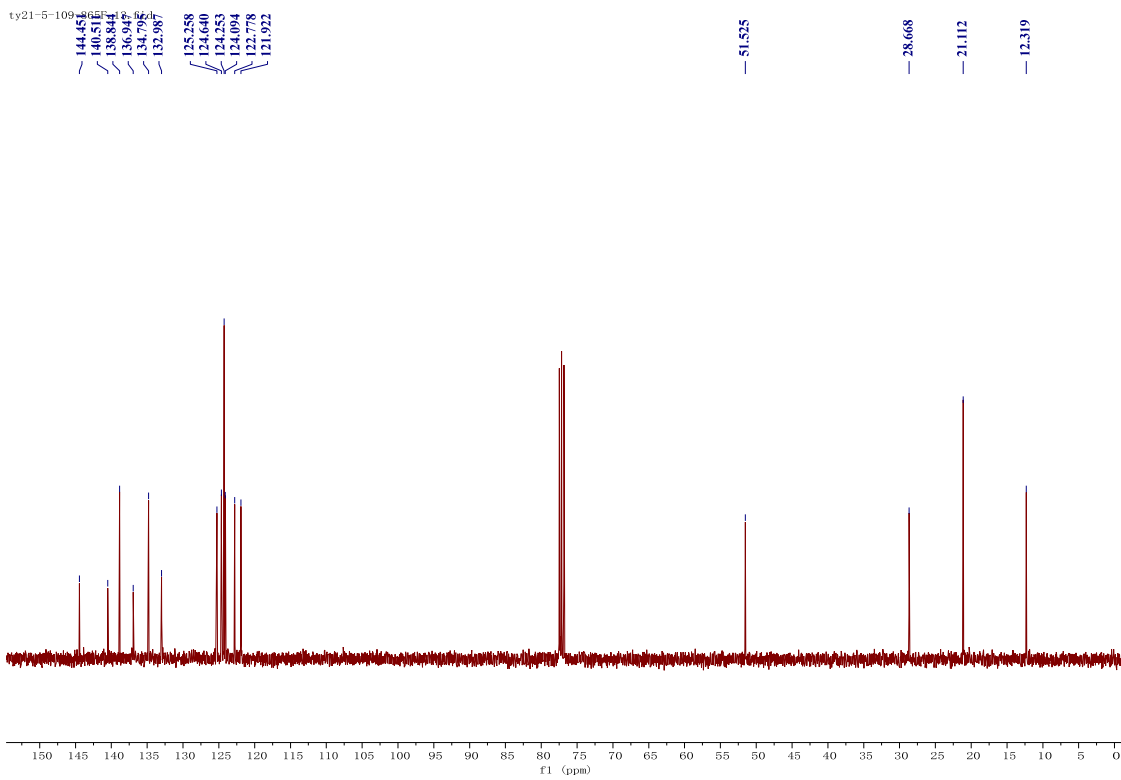

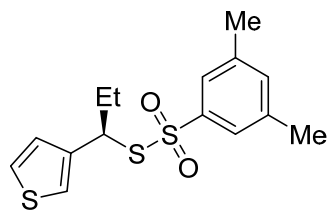

36

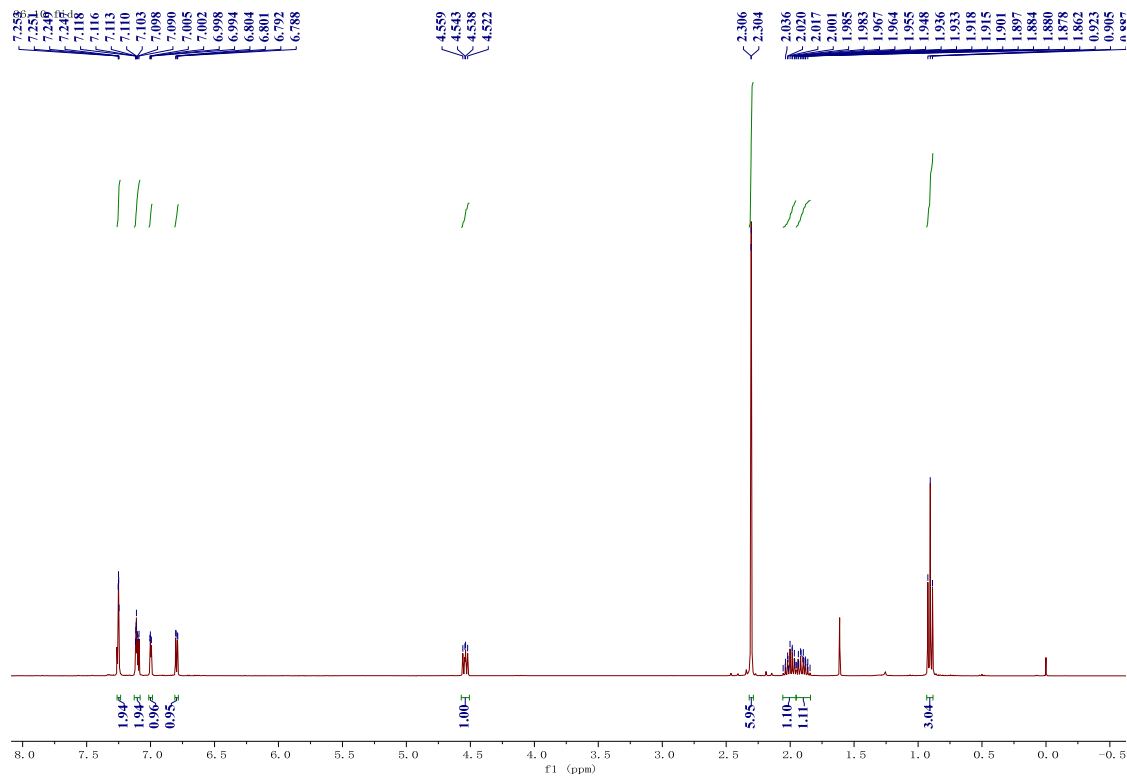

36, 11. f1d

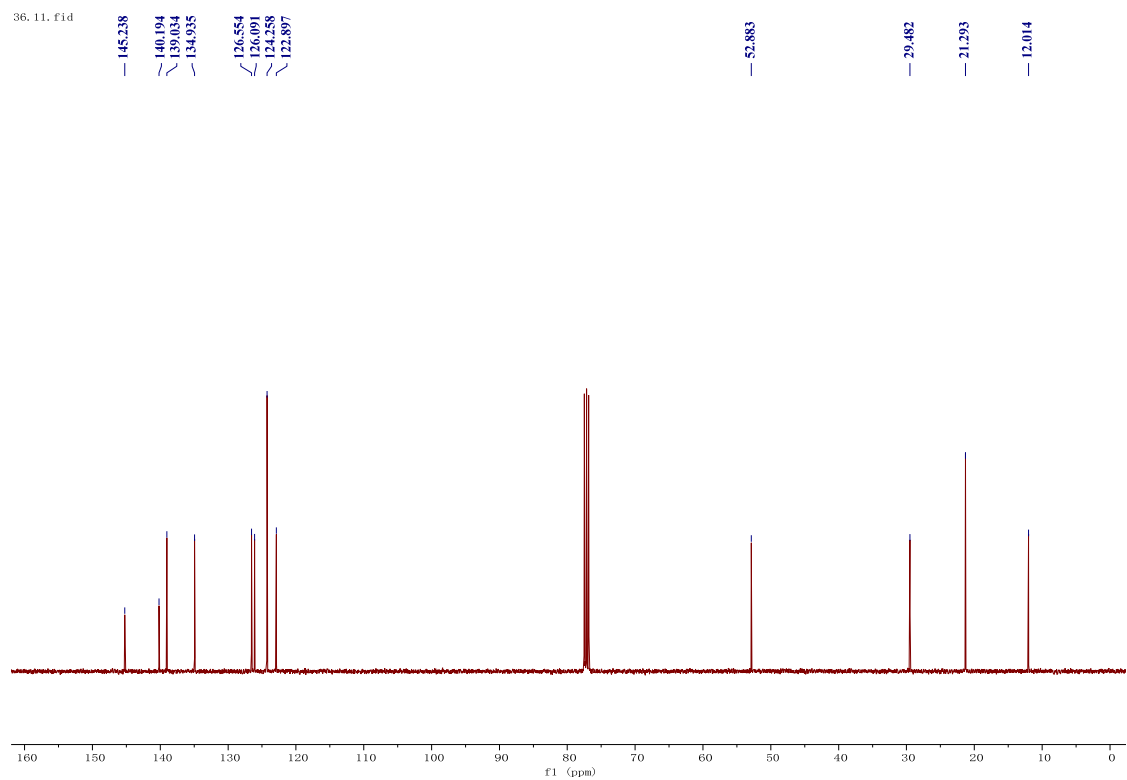

S293

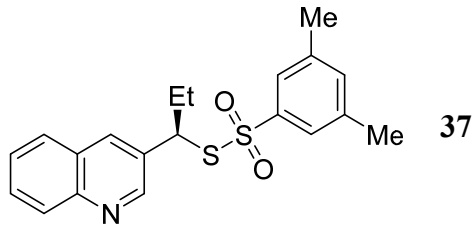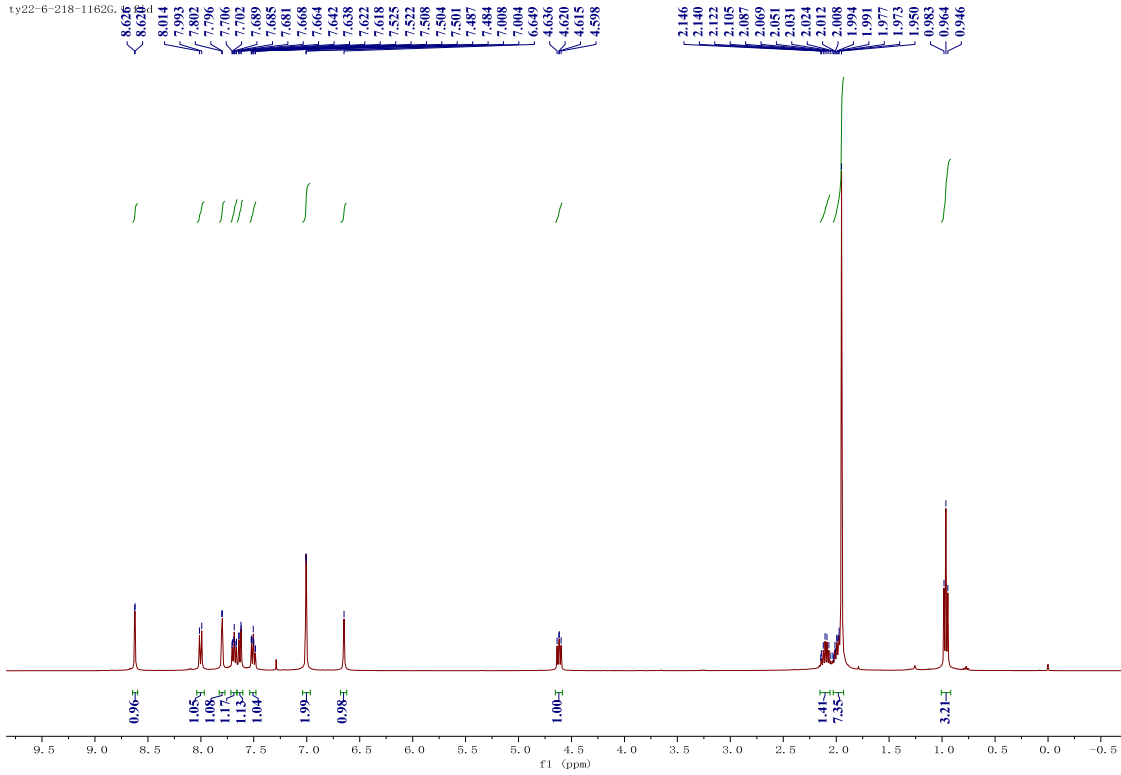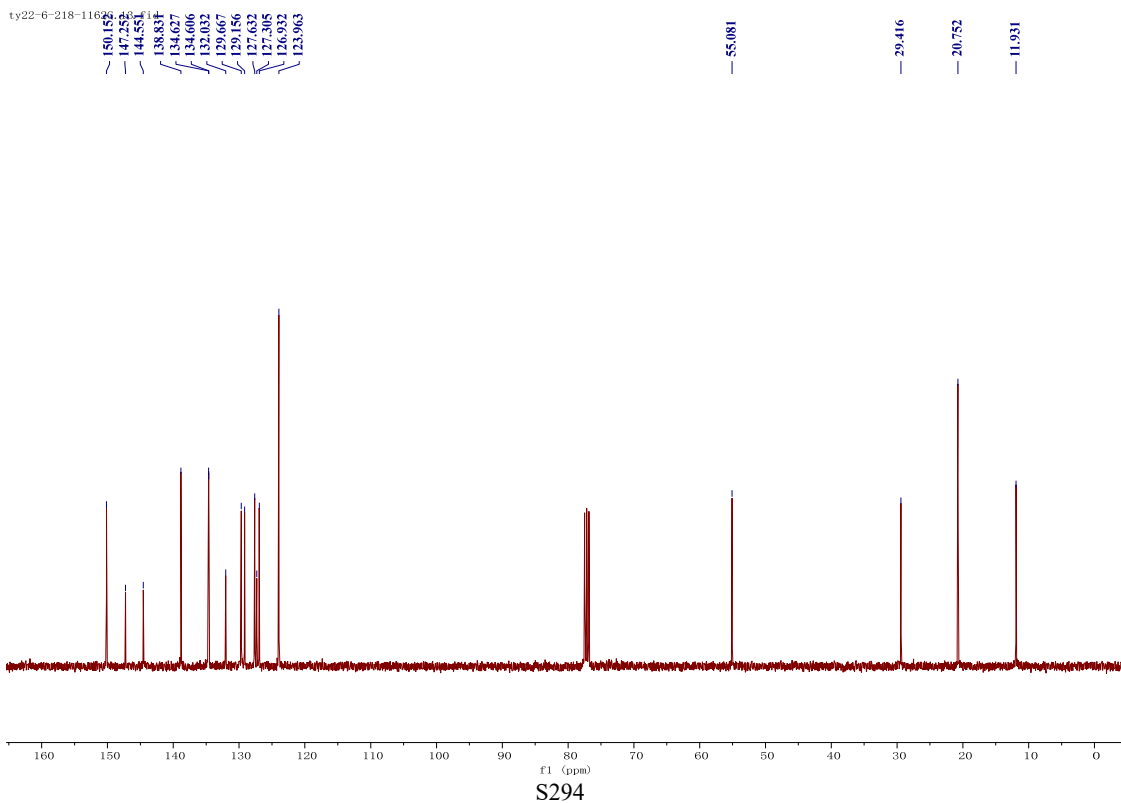

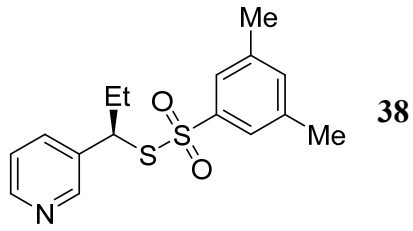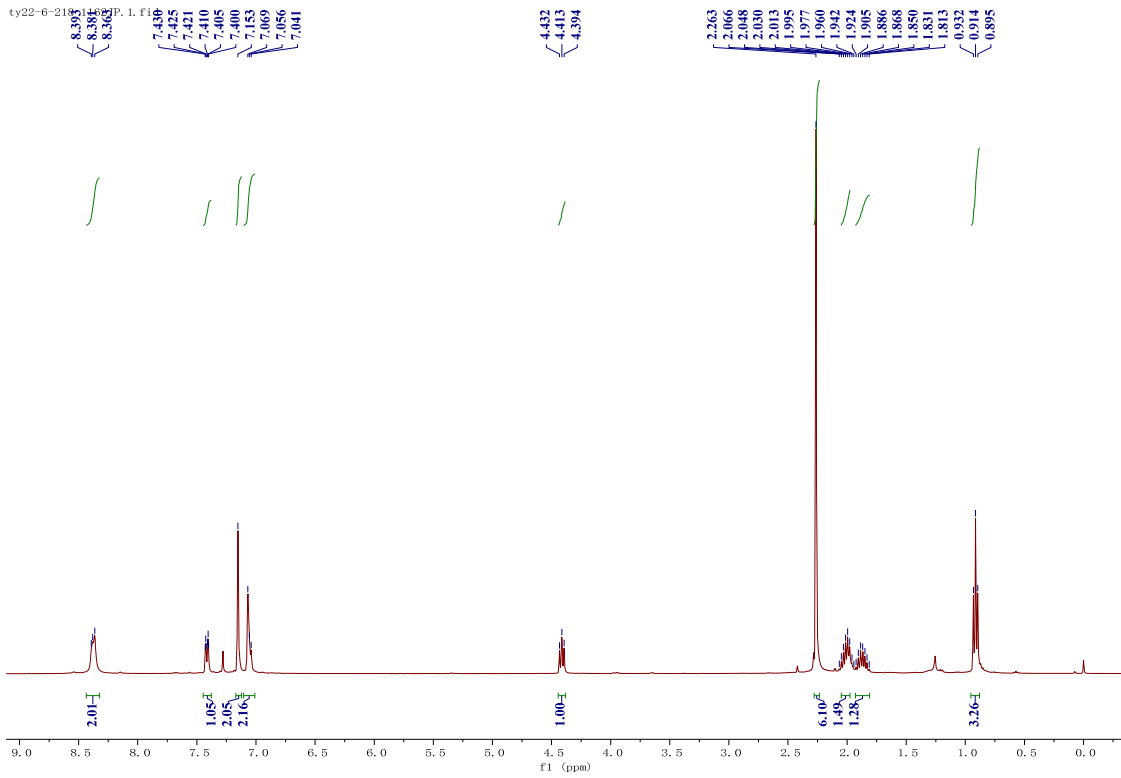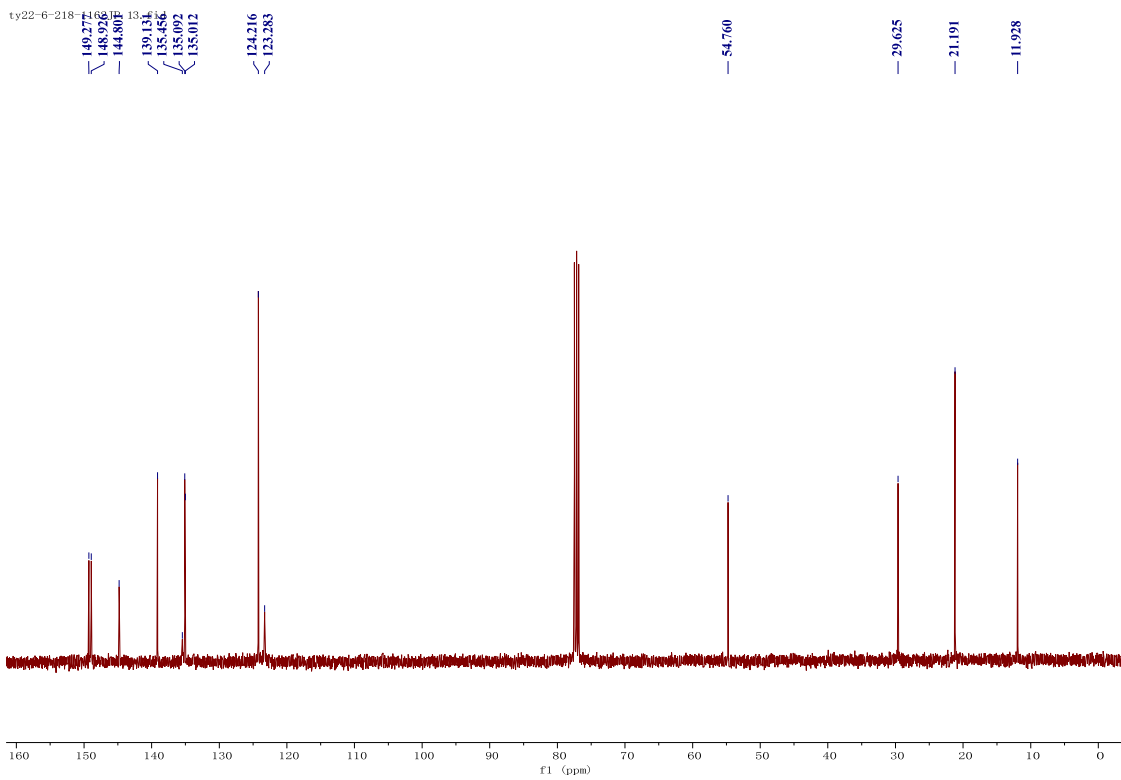



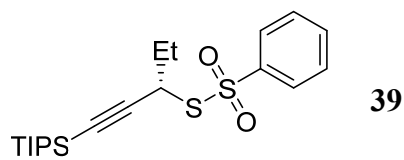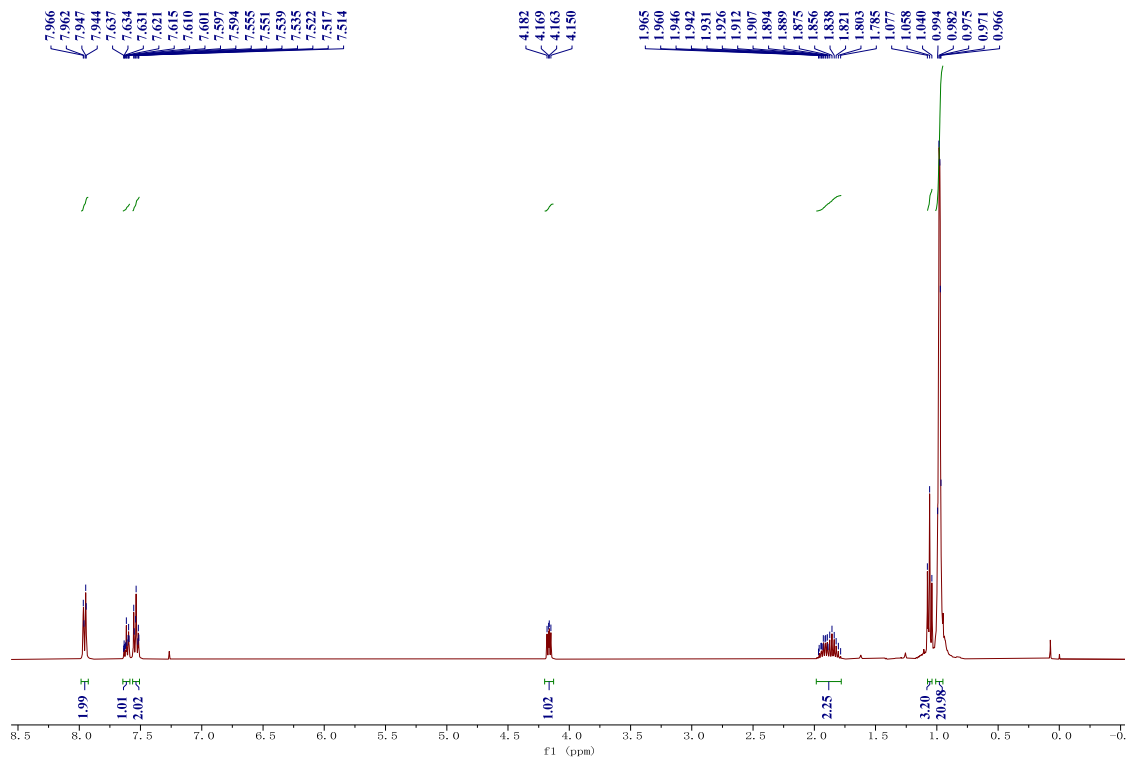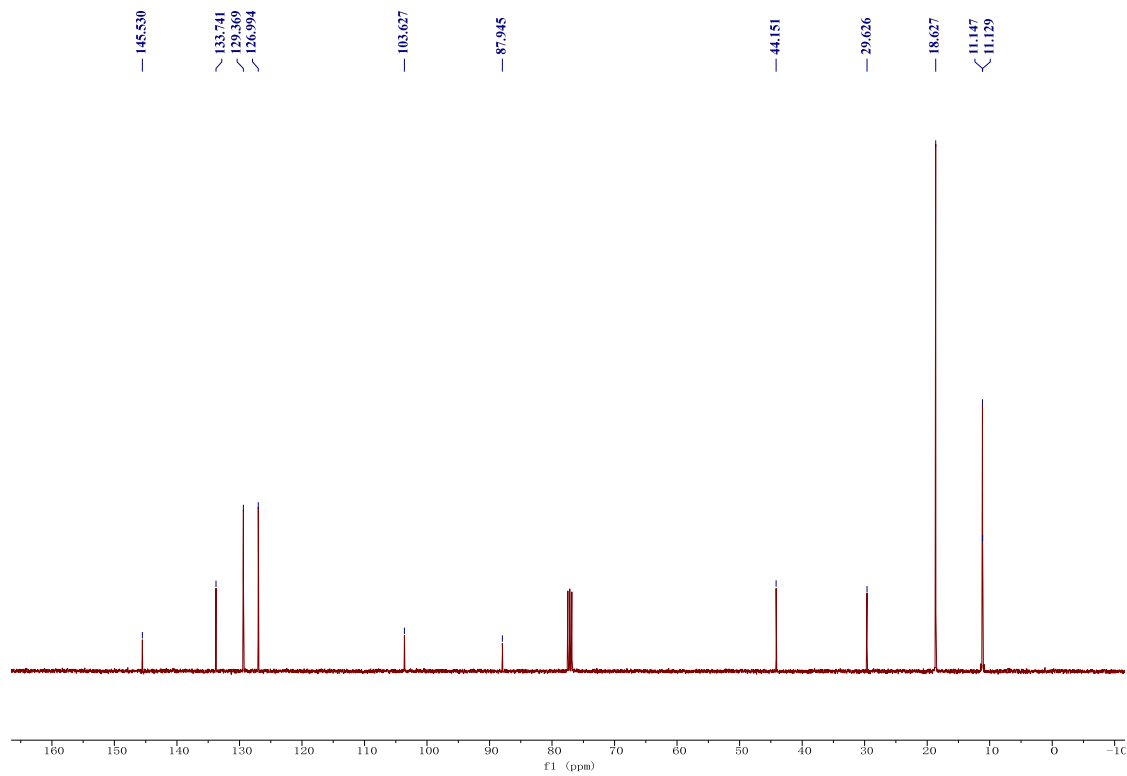

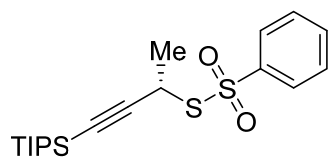

40

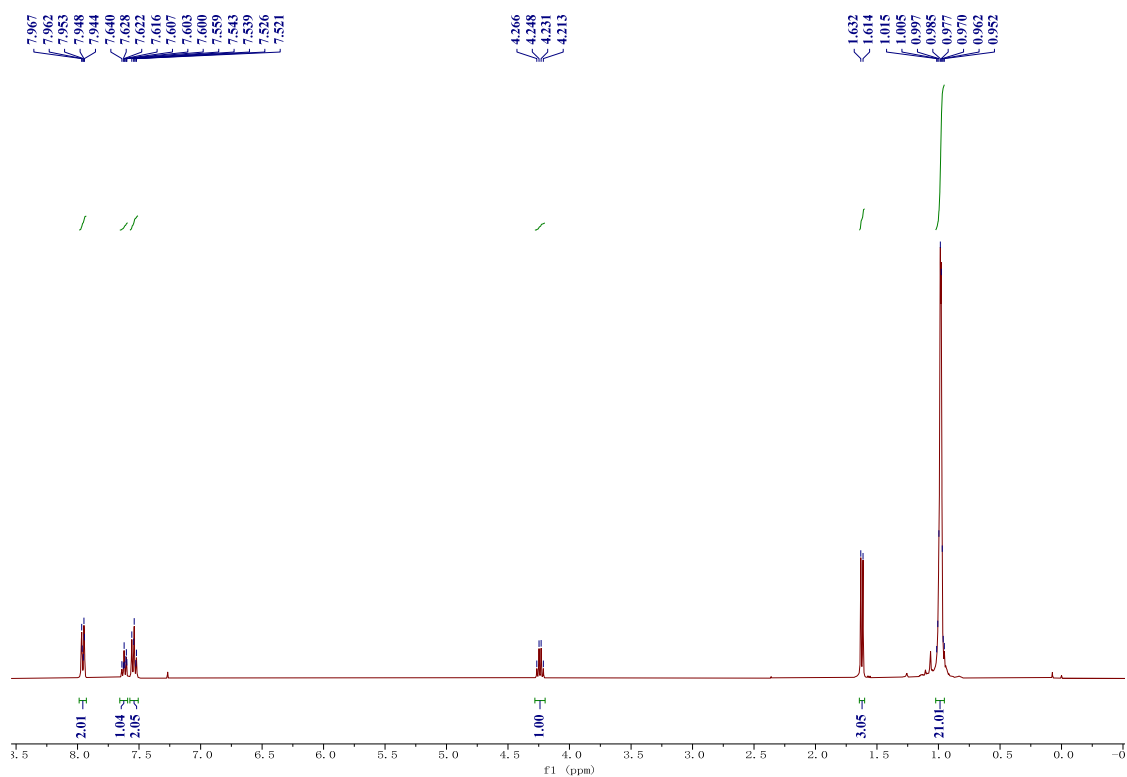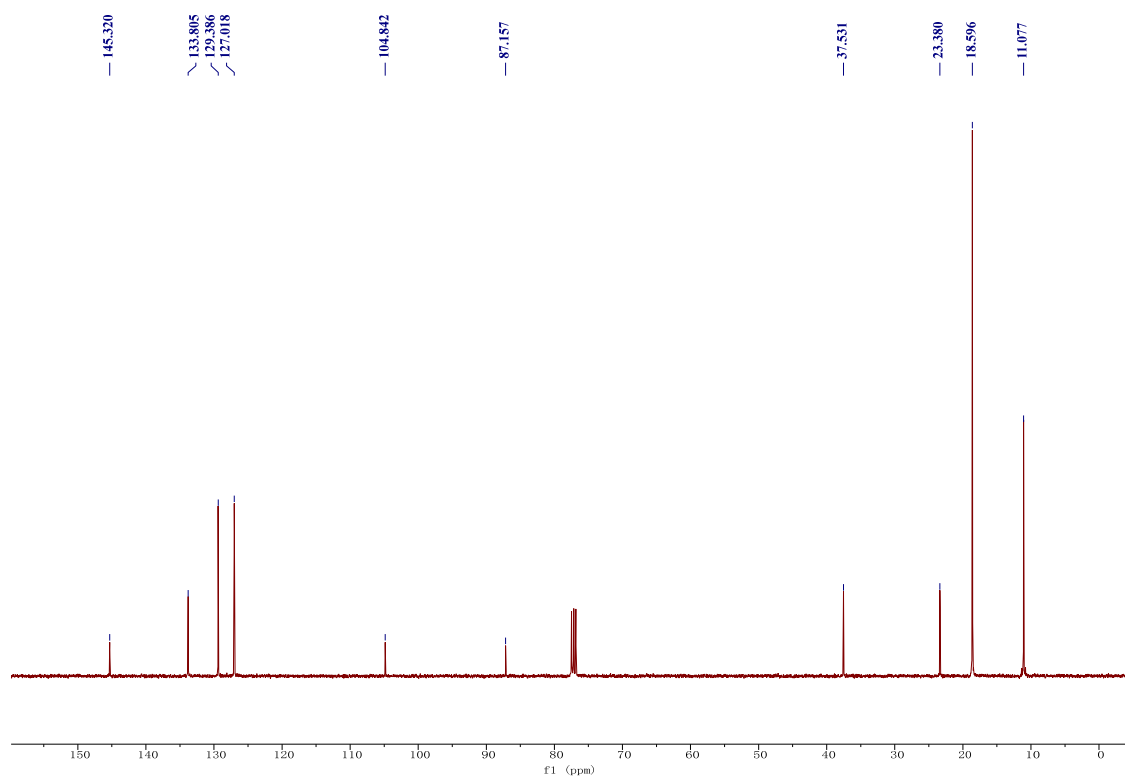

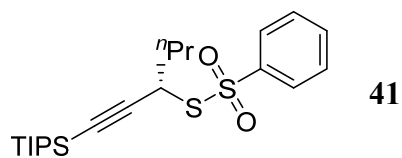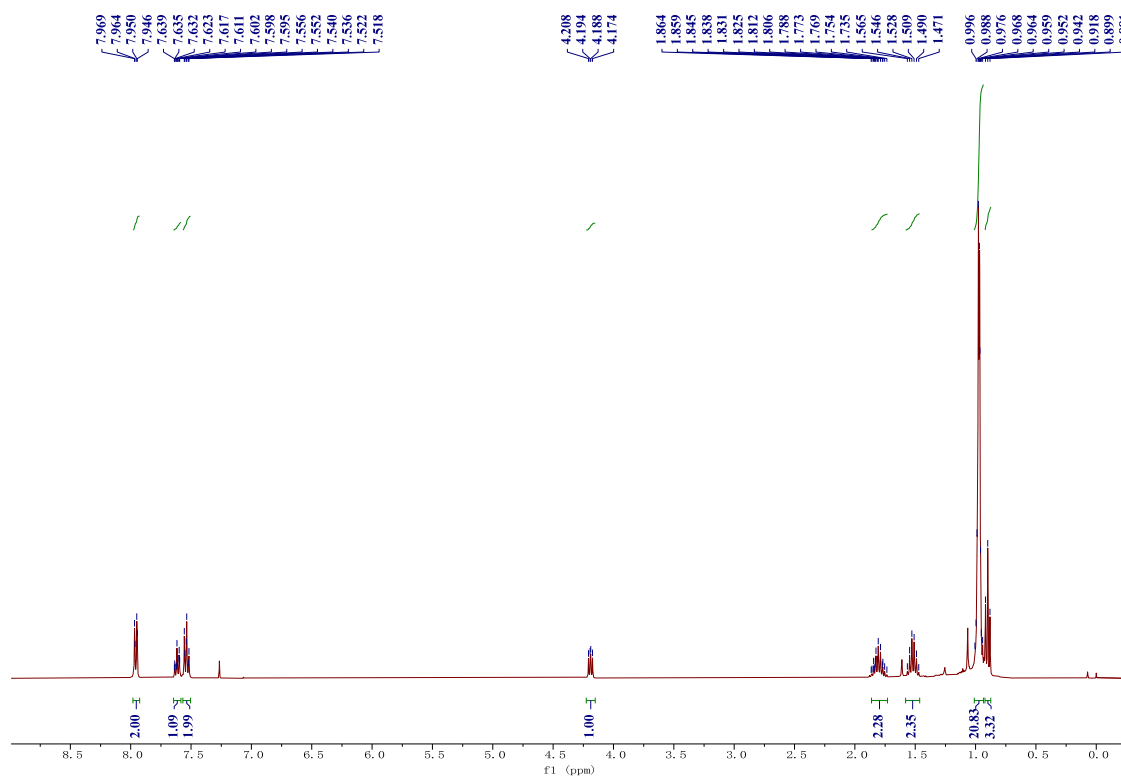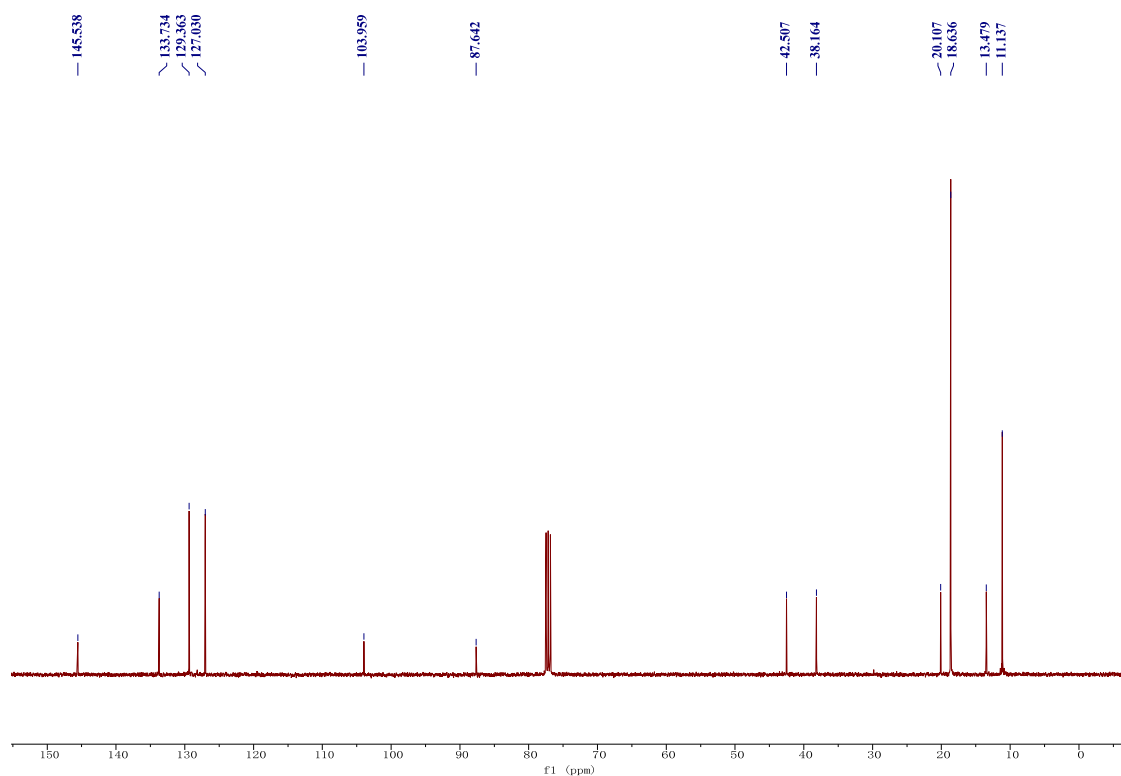

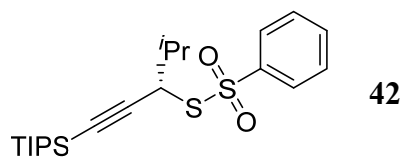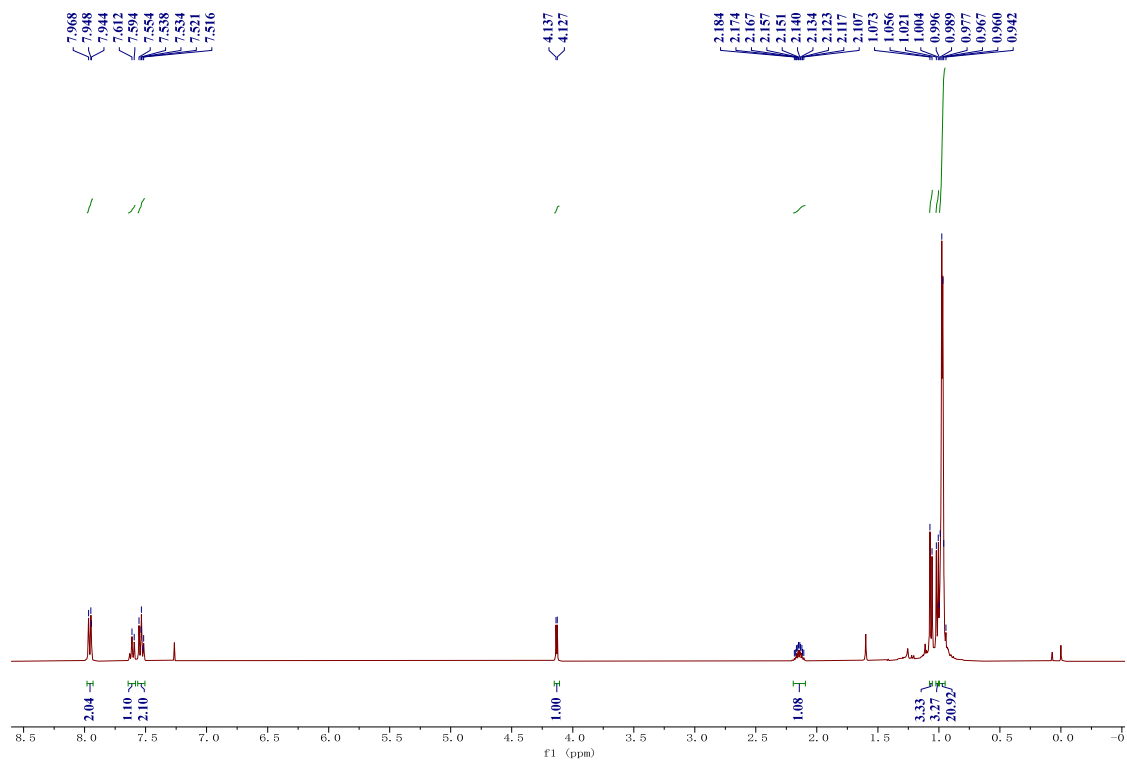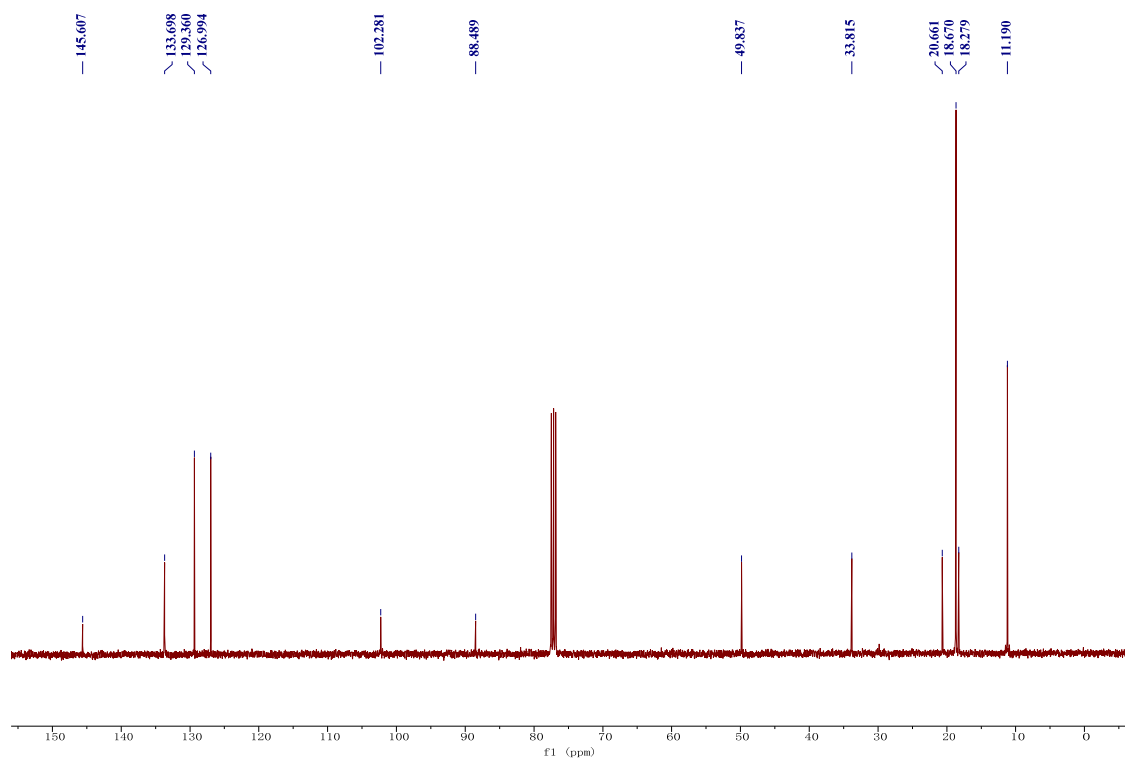

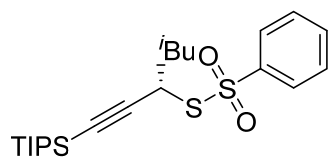

43

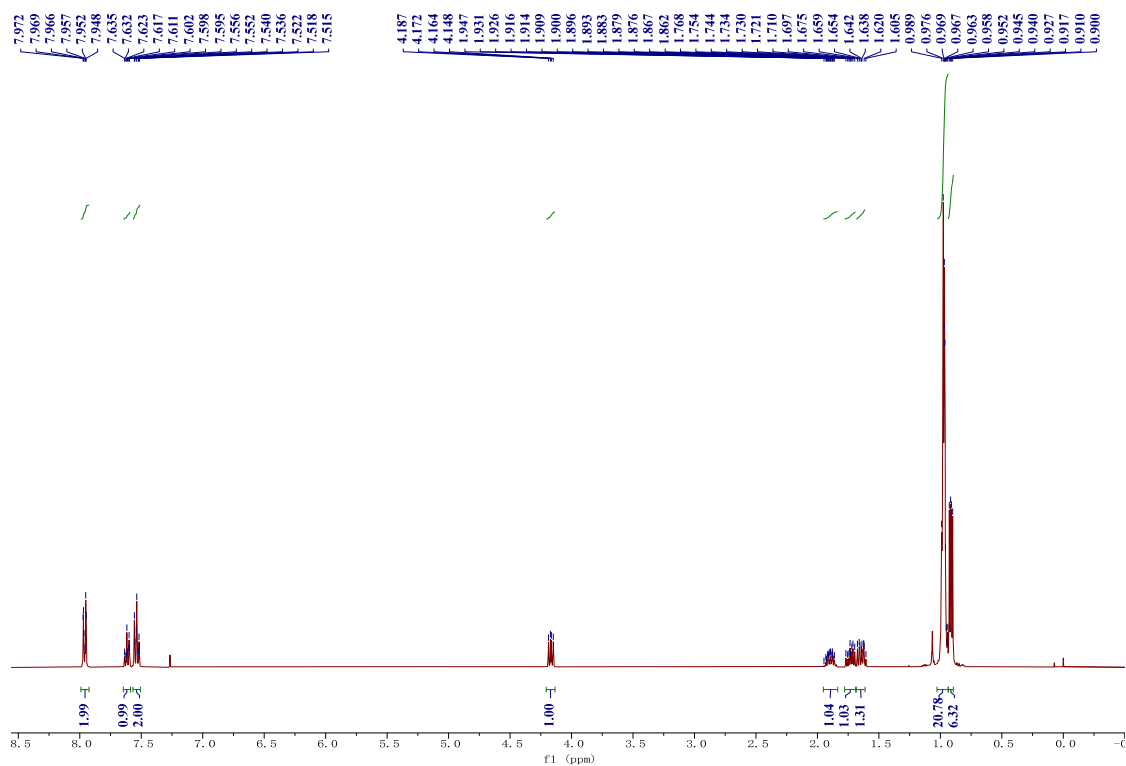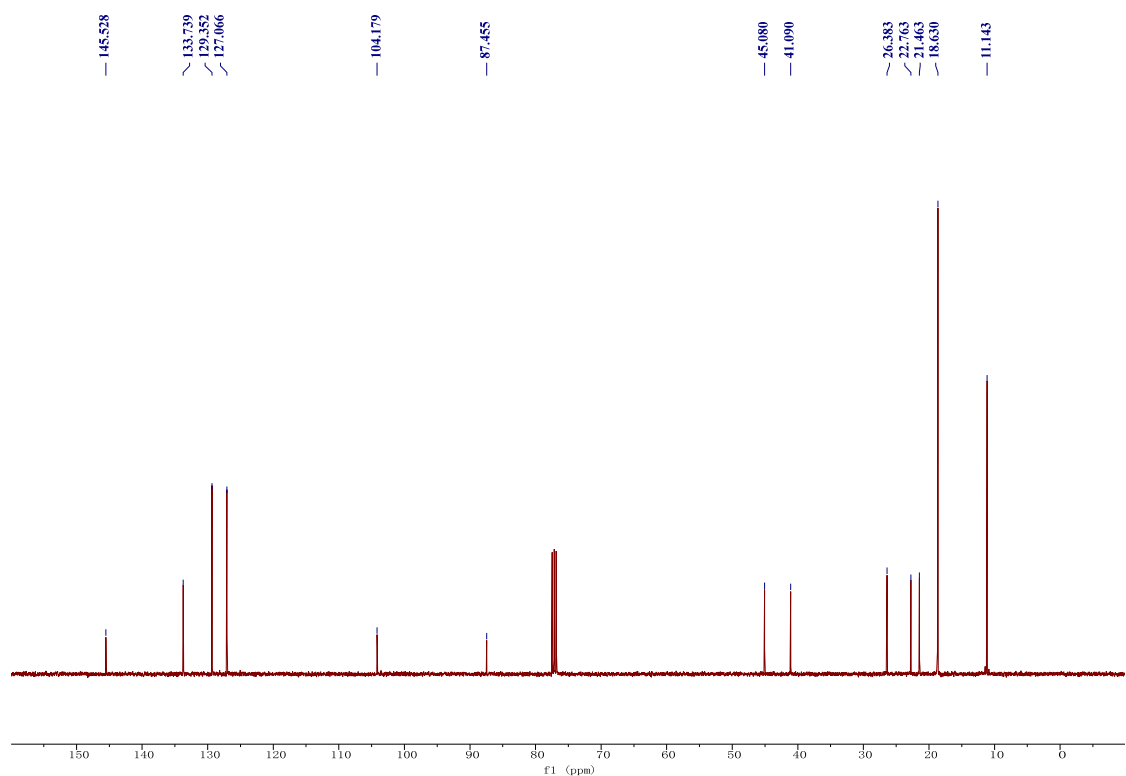

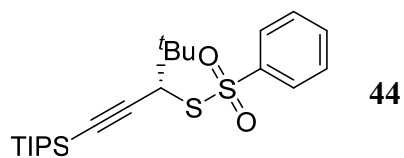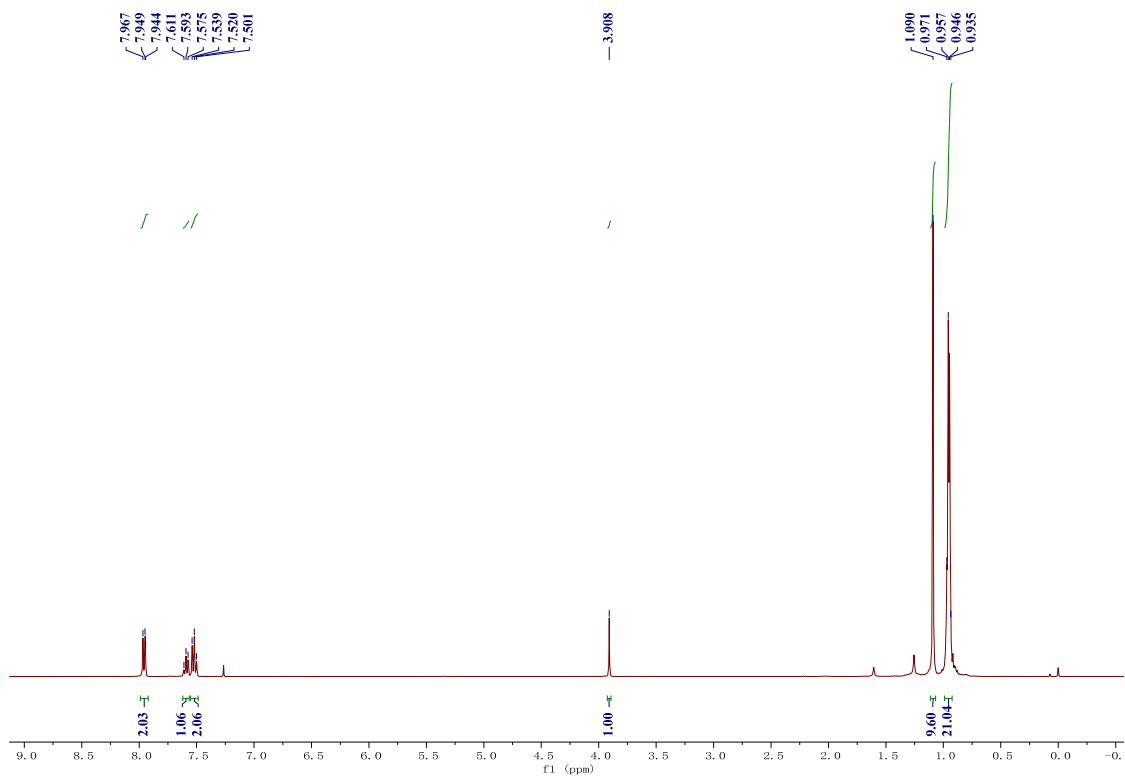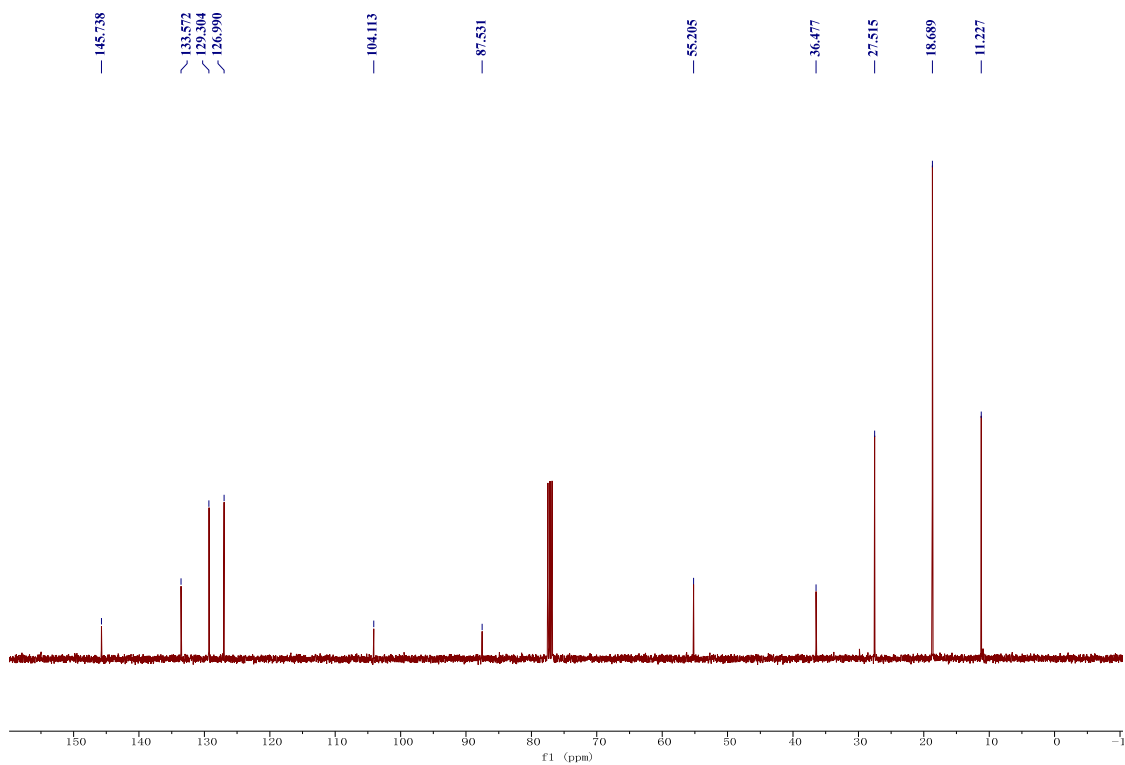

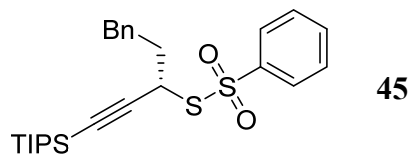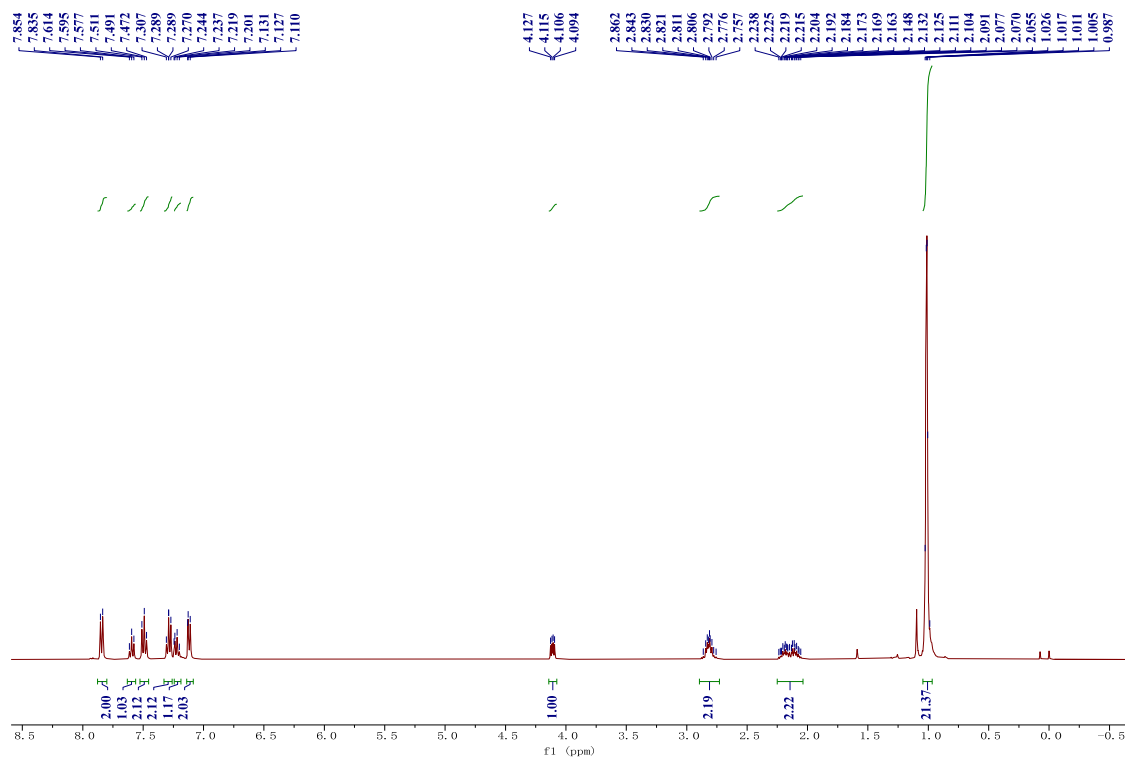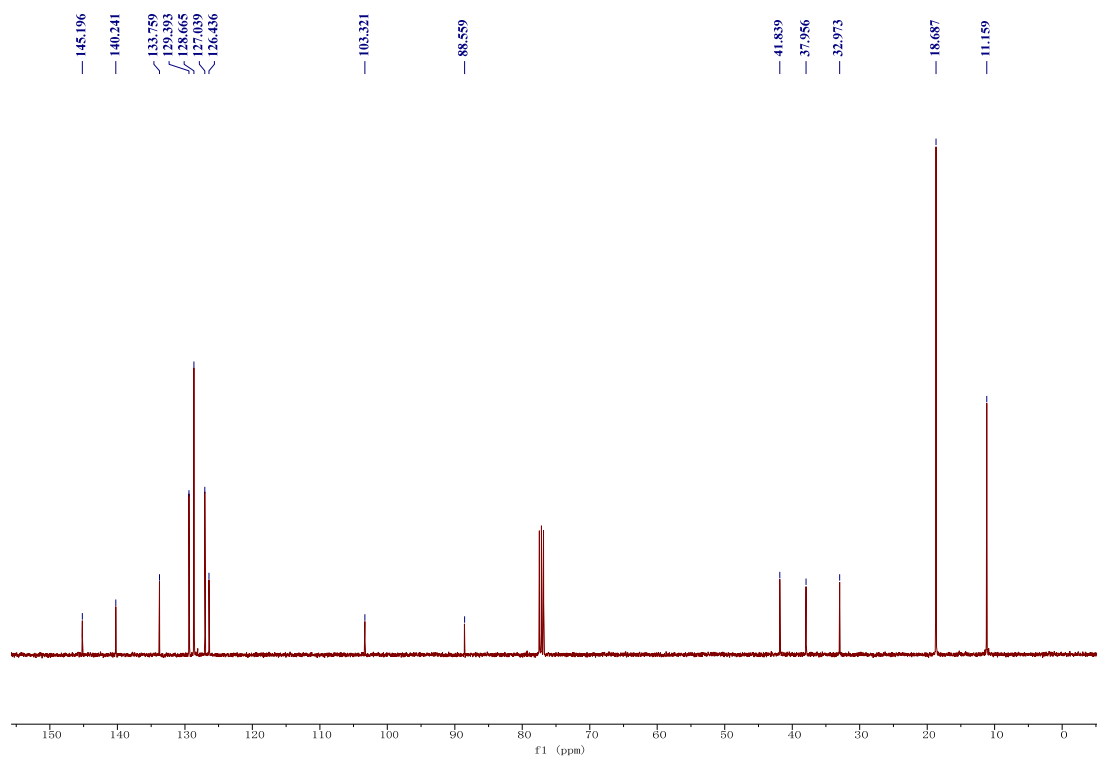

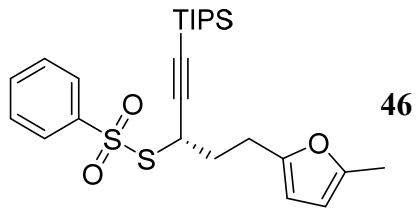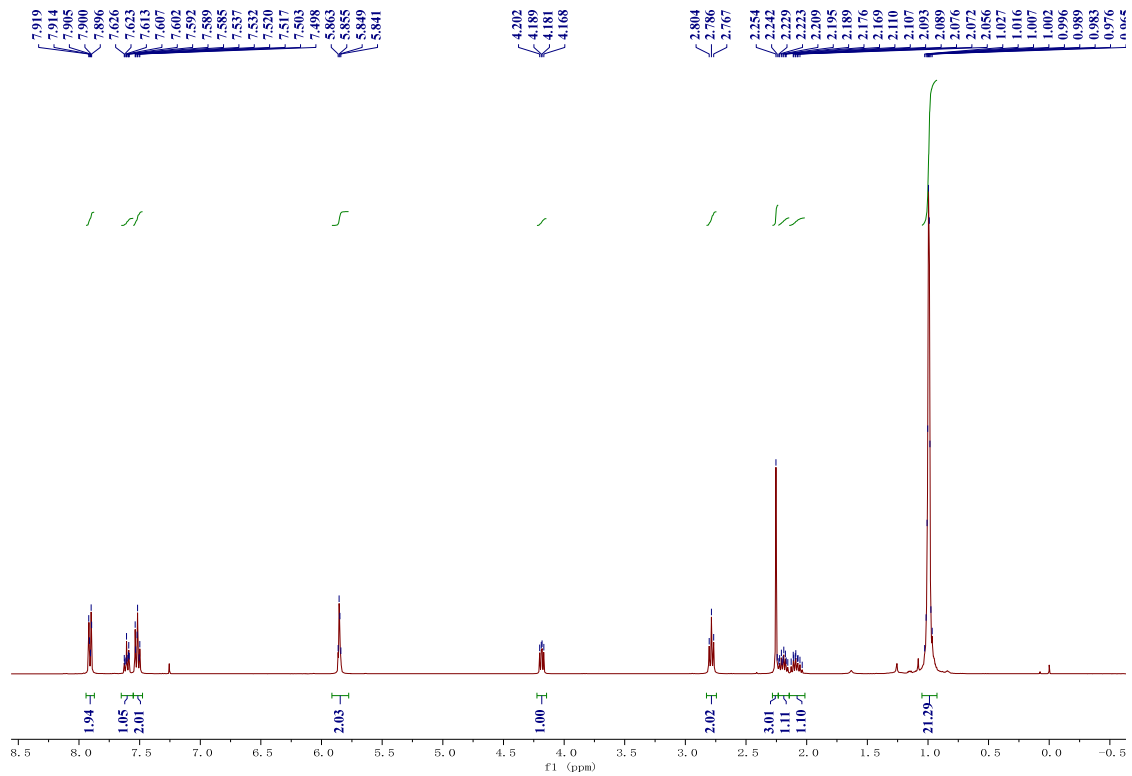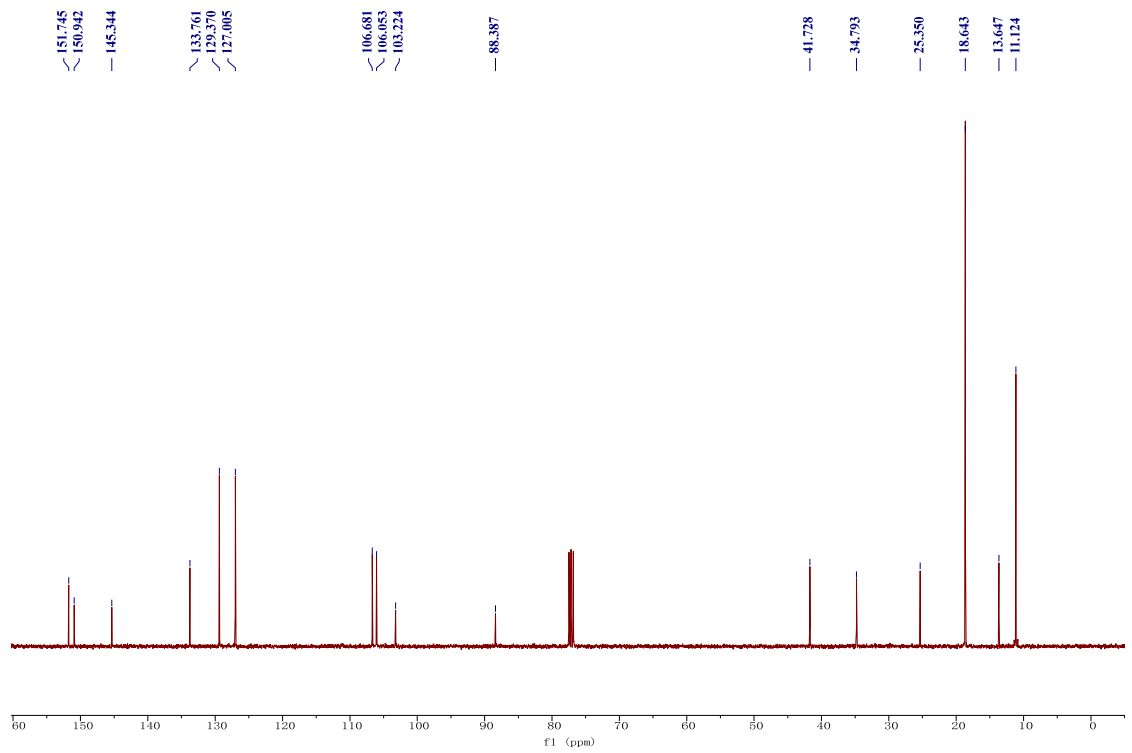

S303



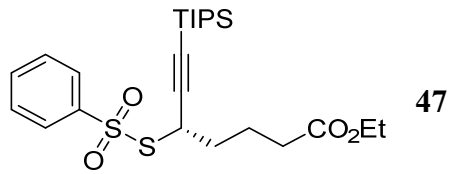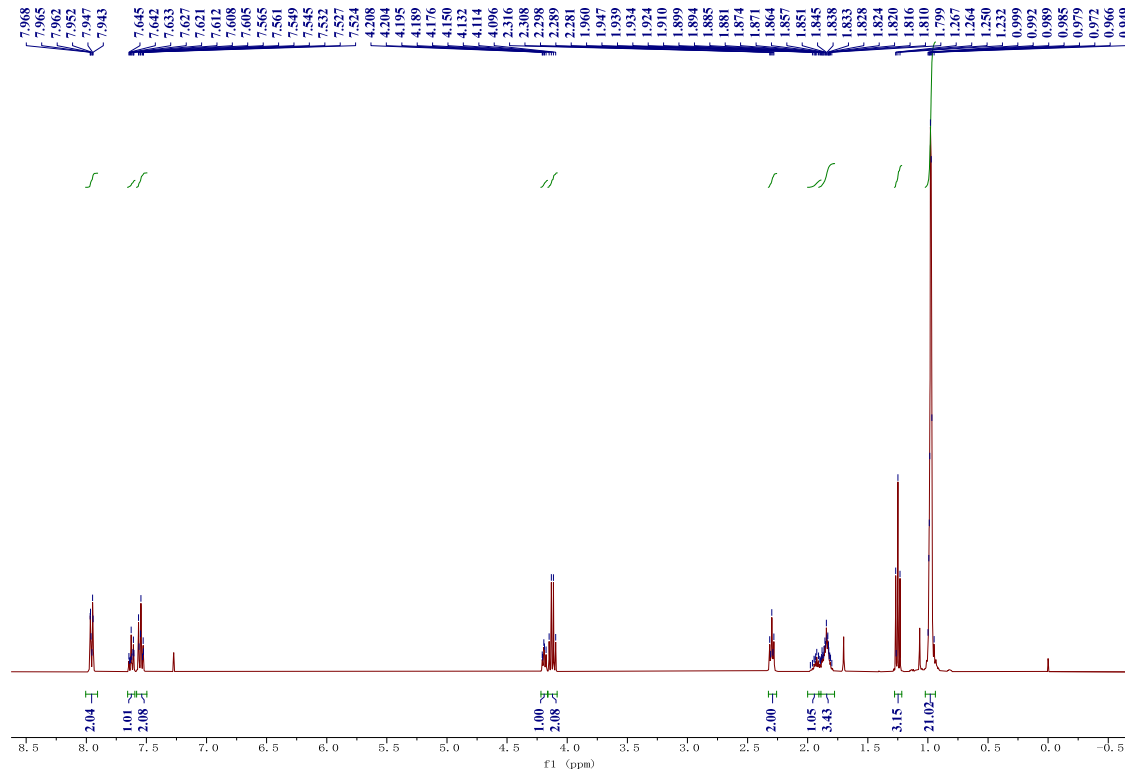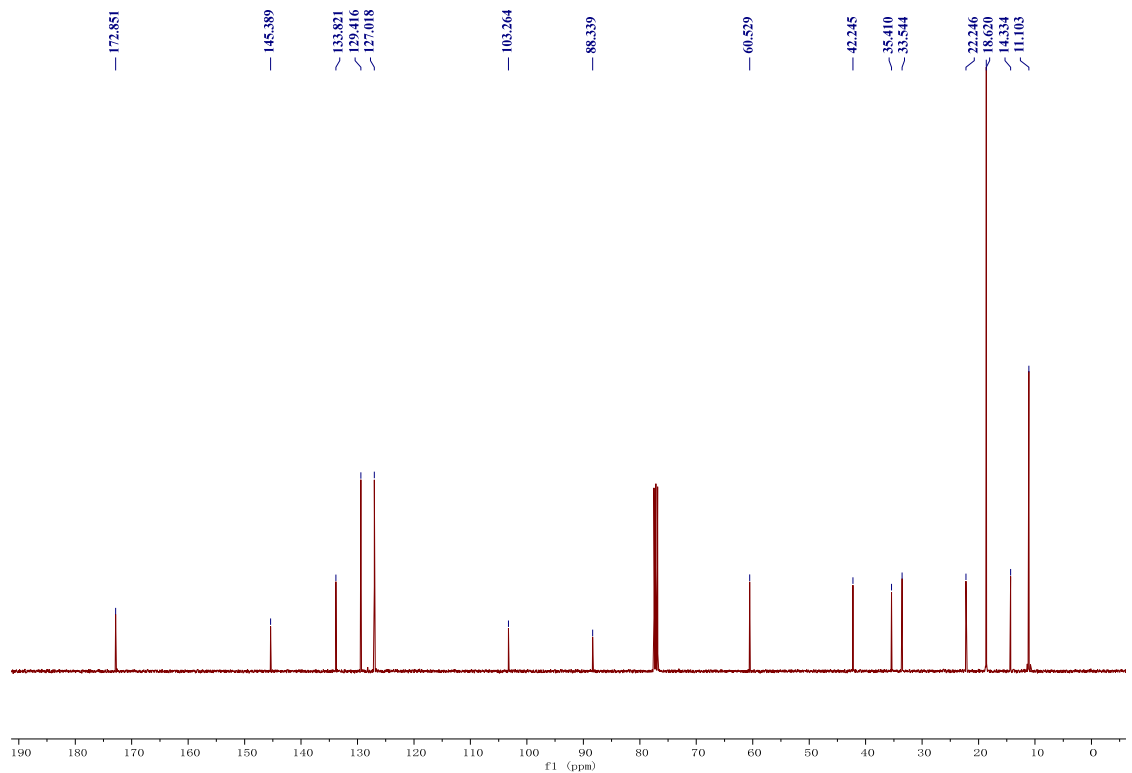

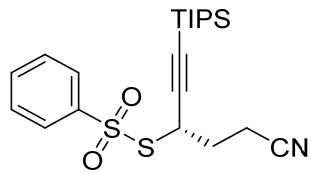

48

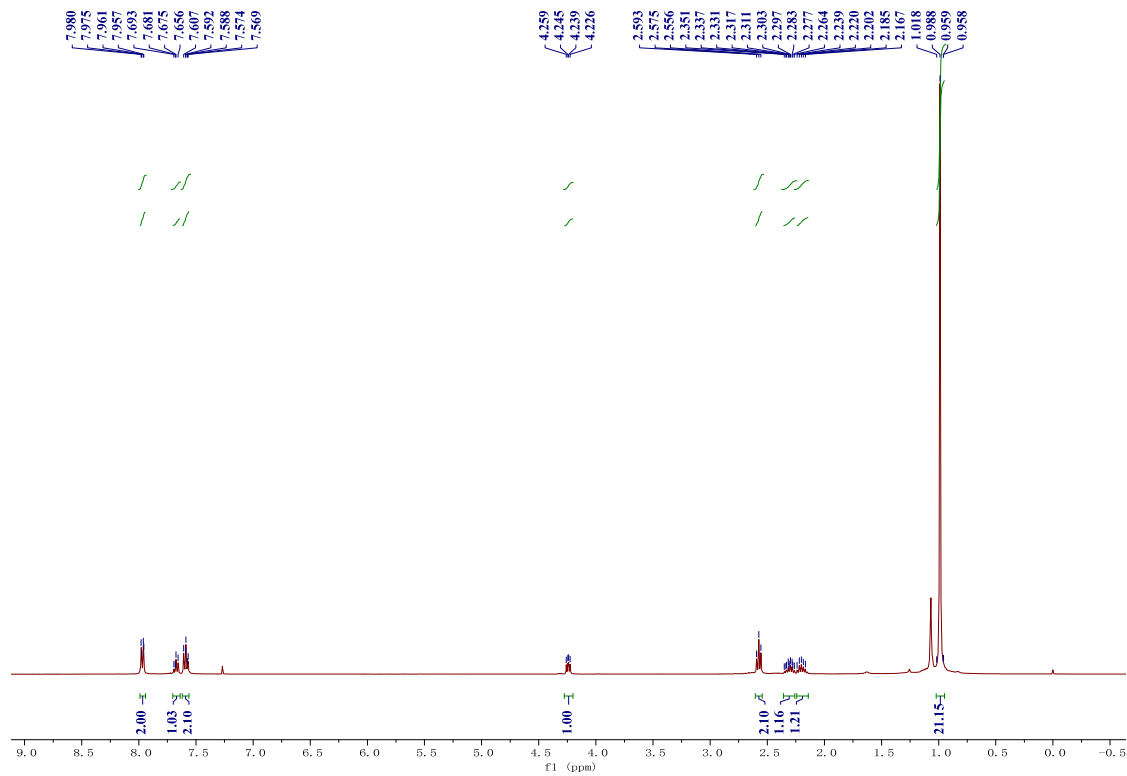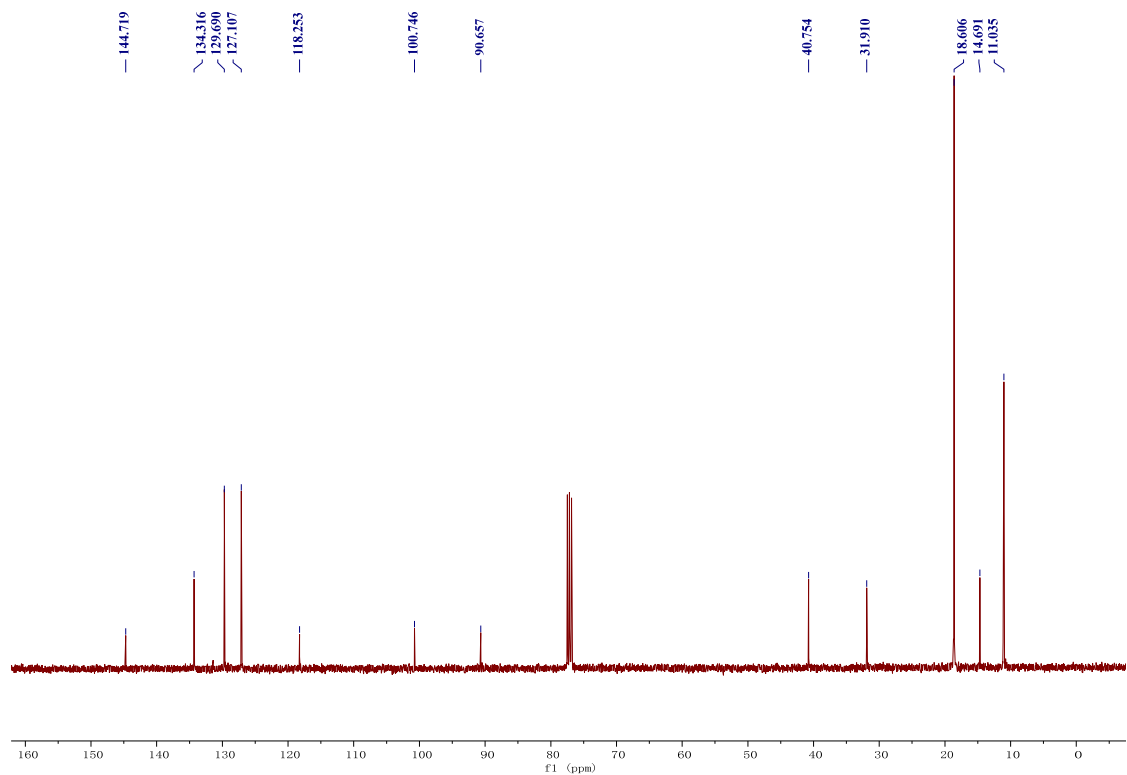

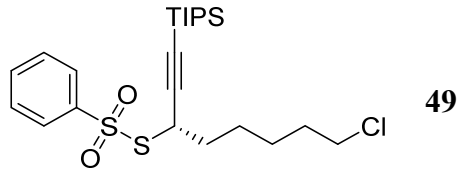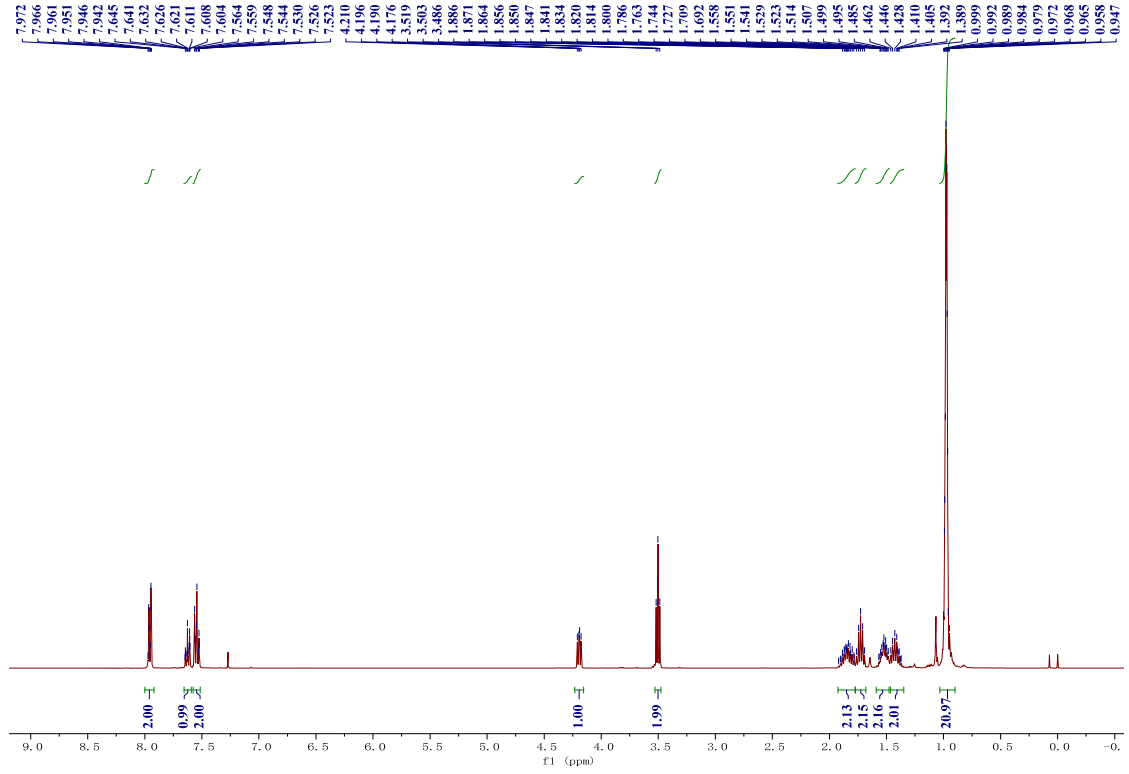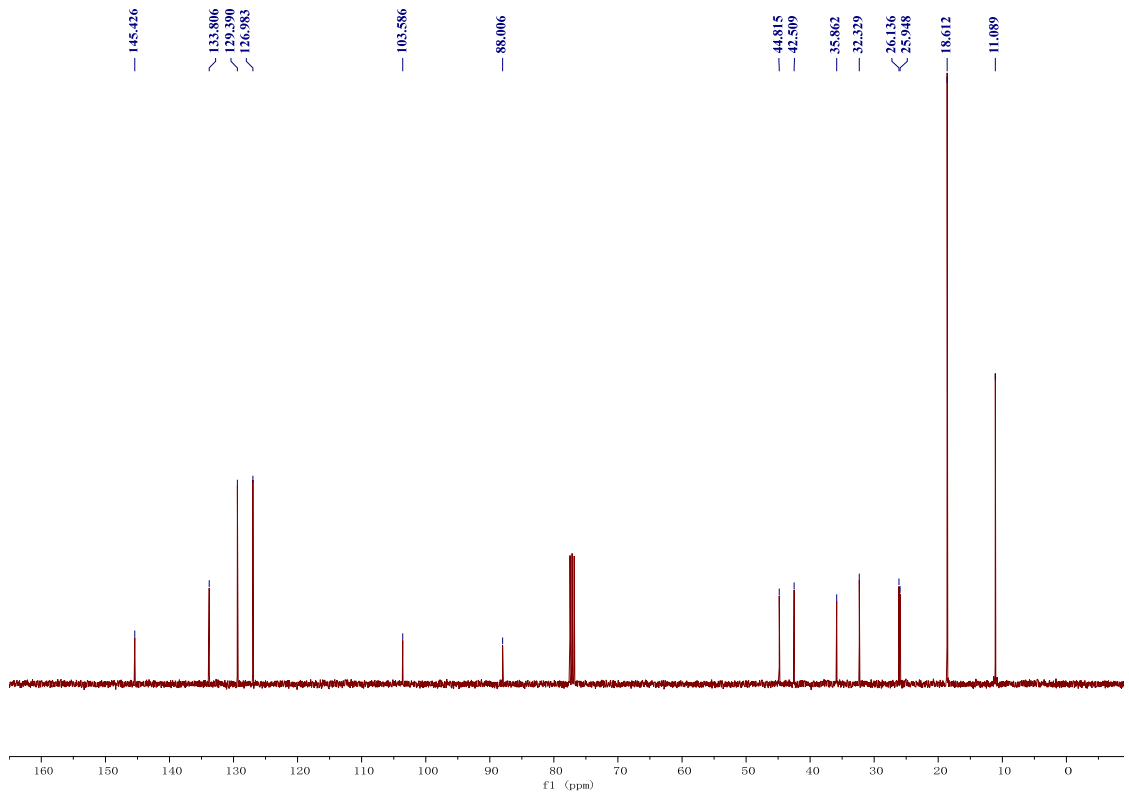

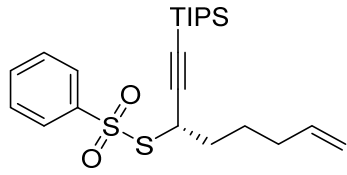

50

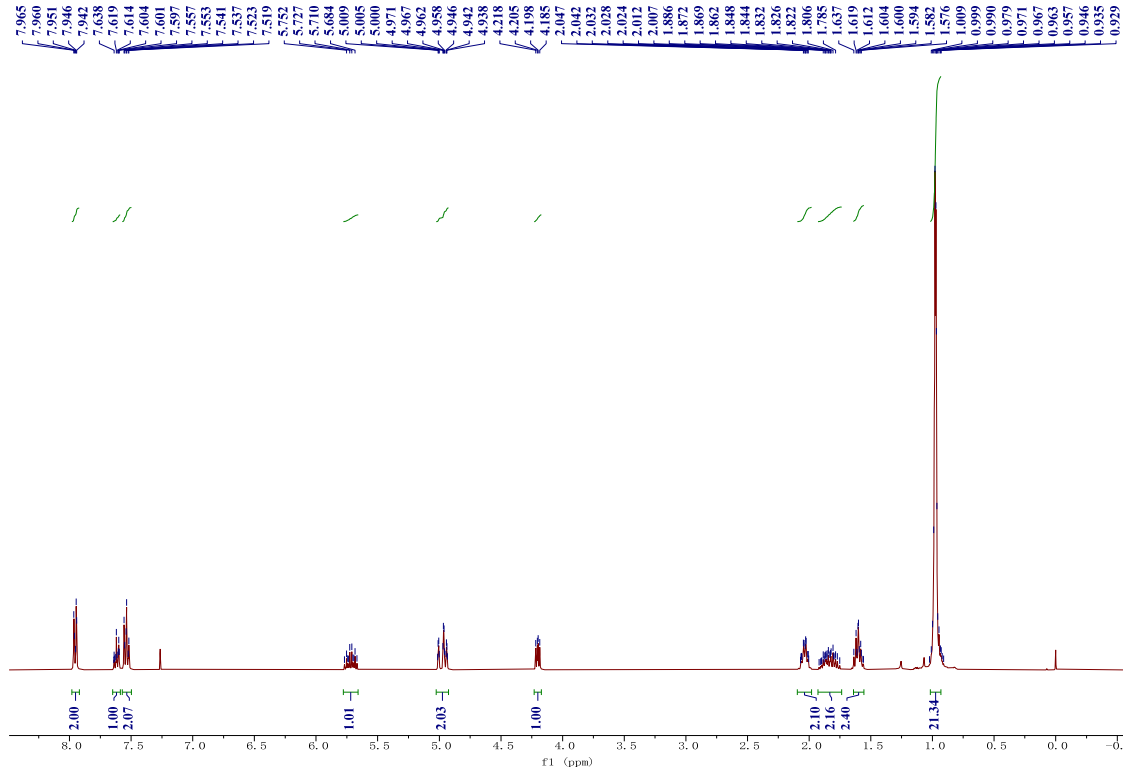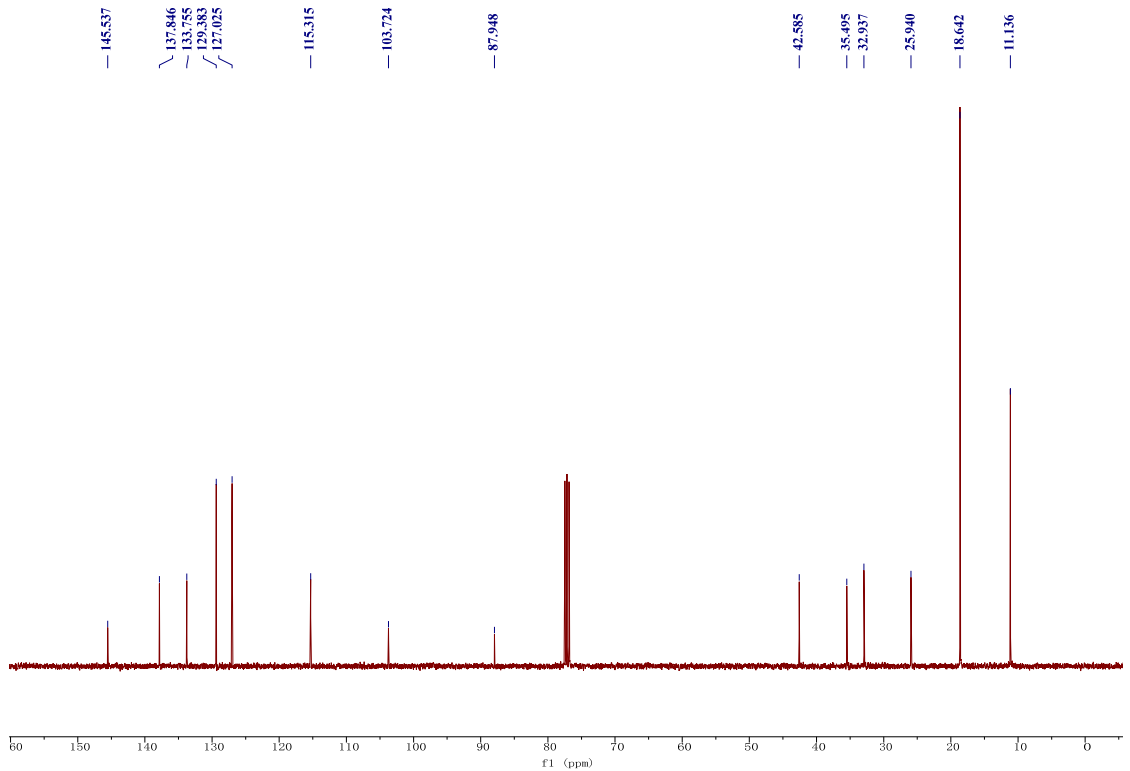

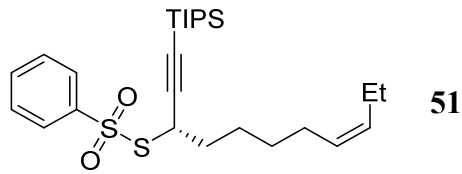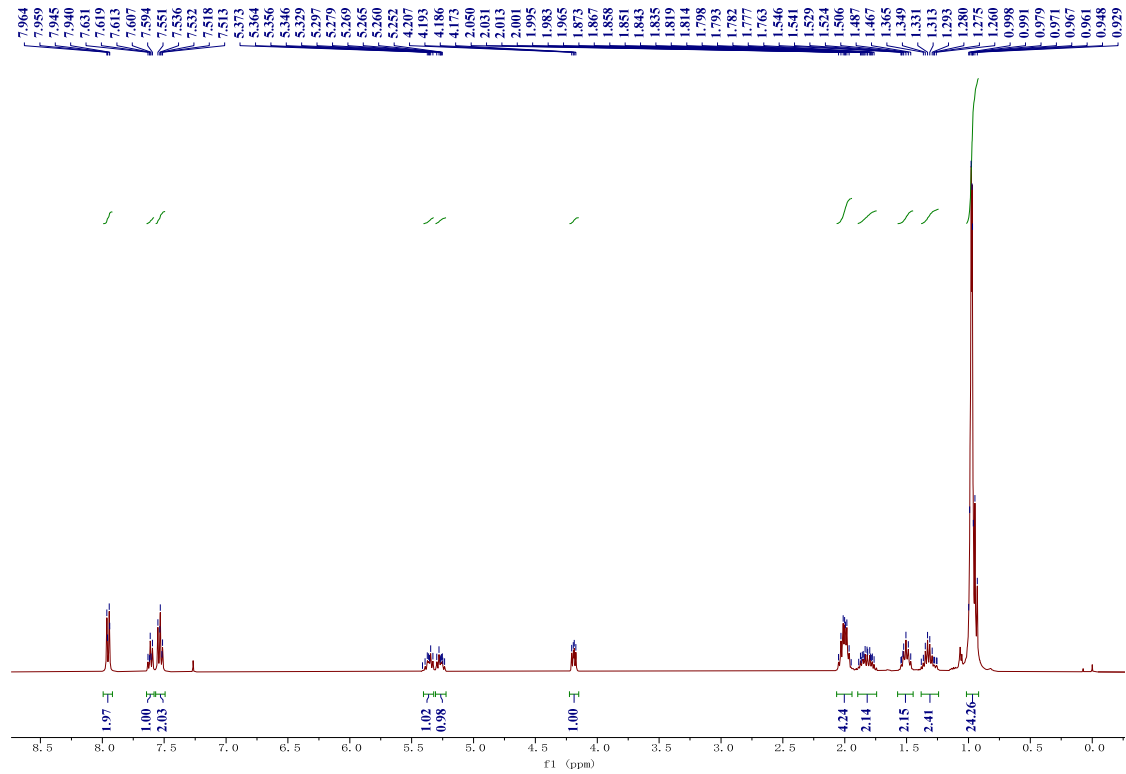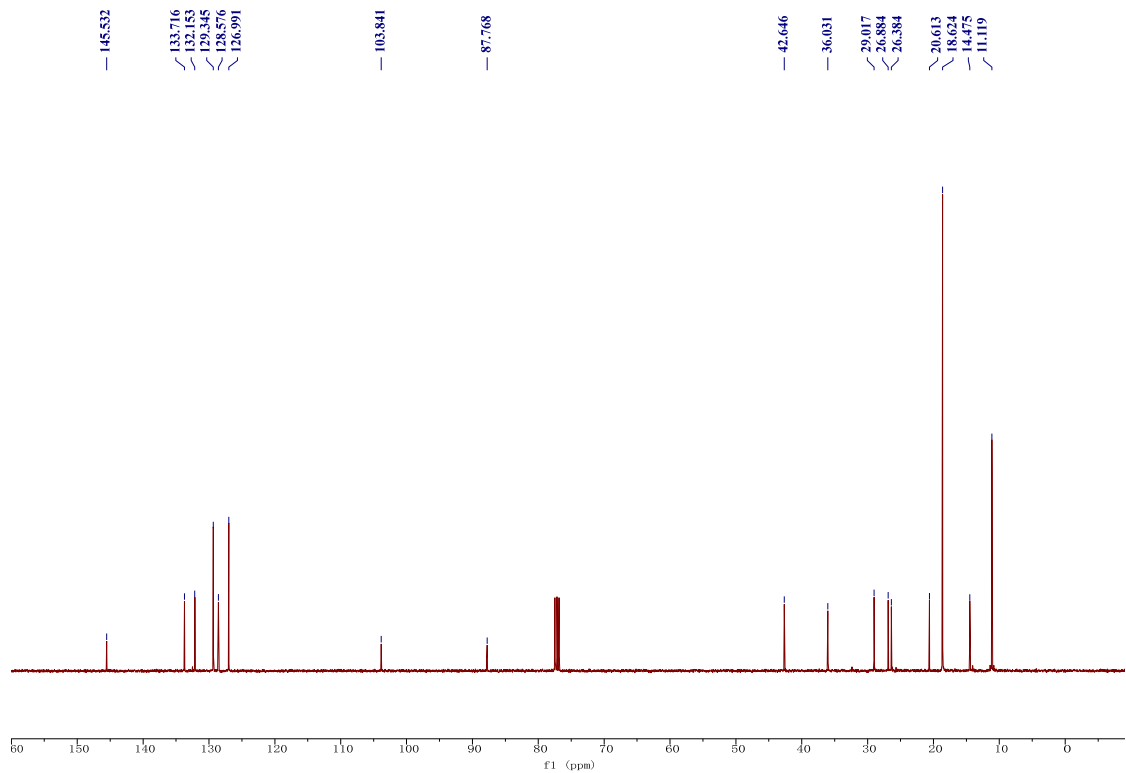

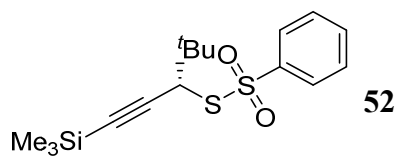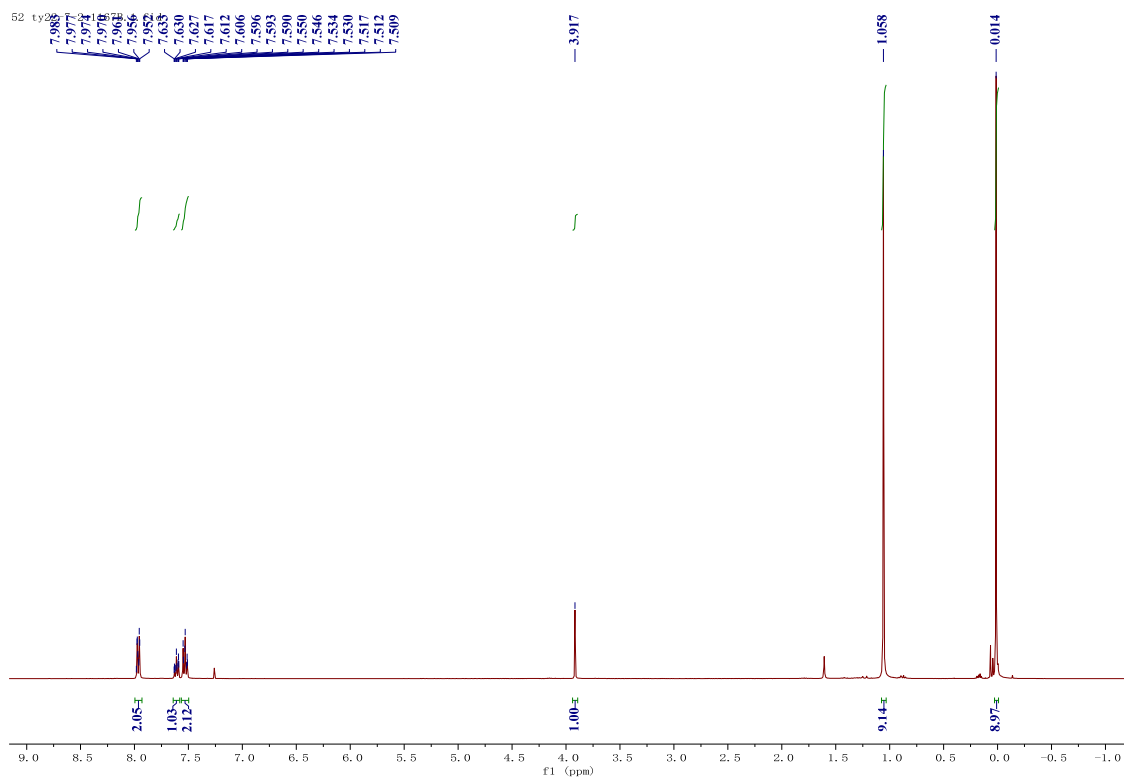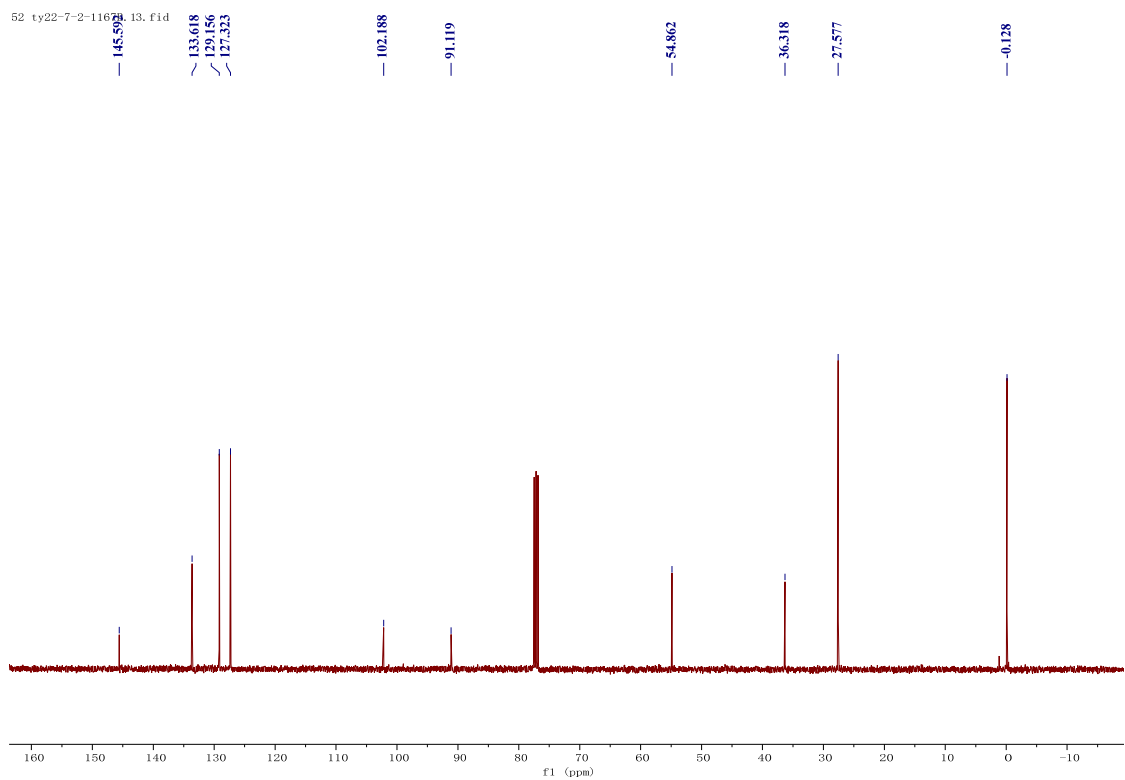

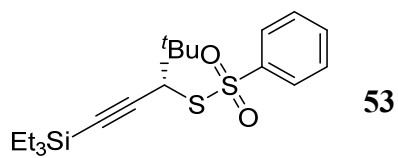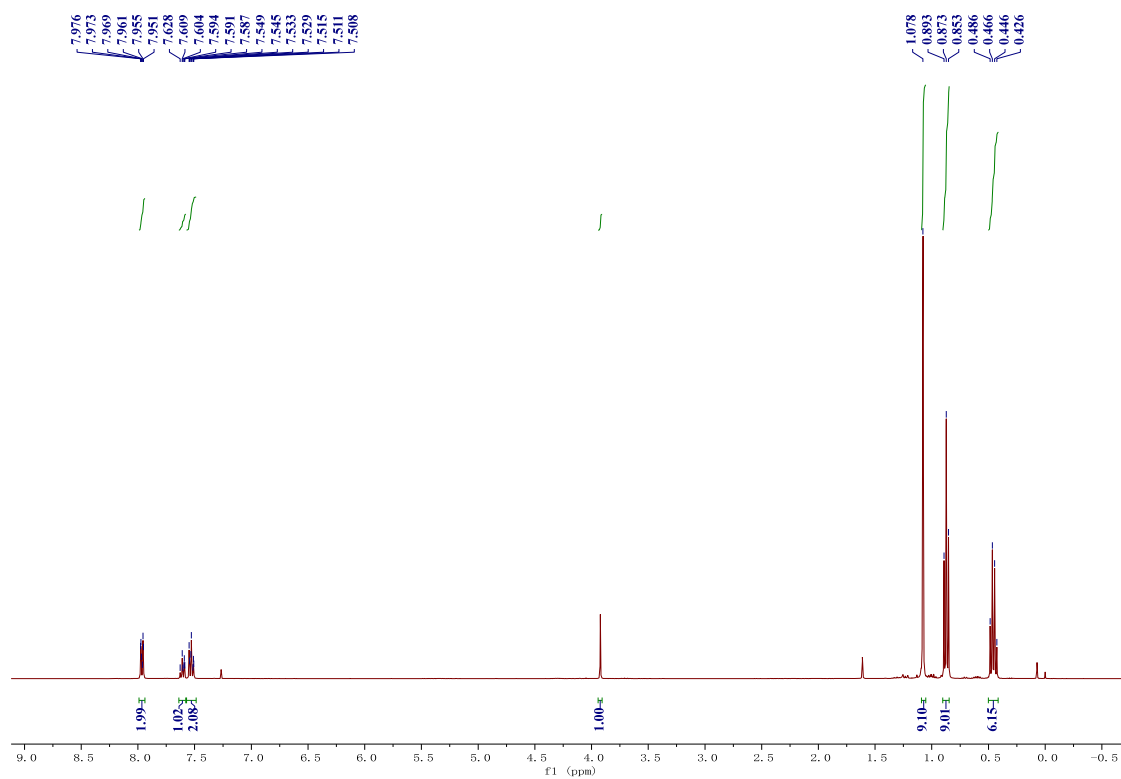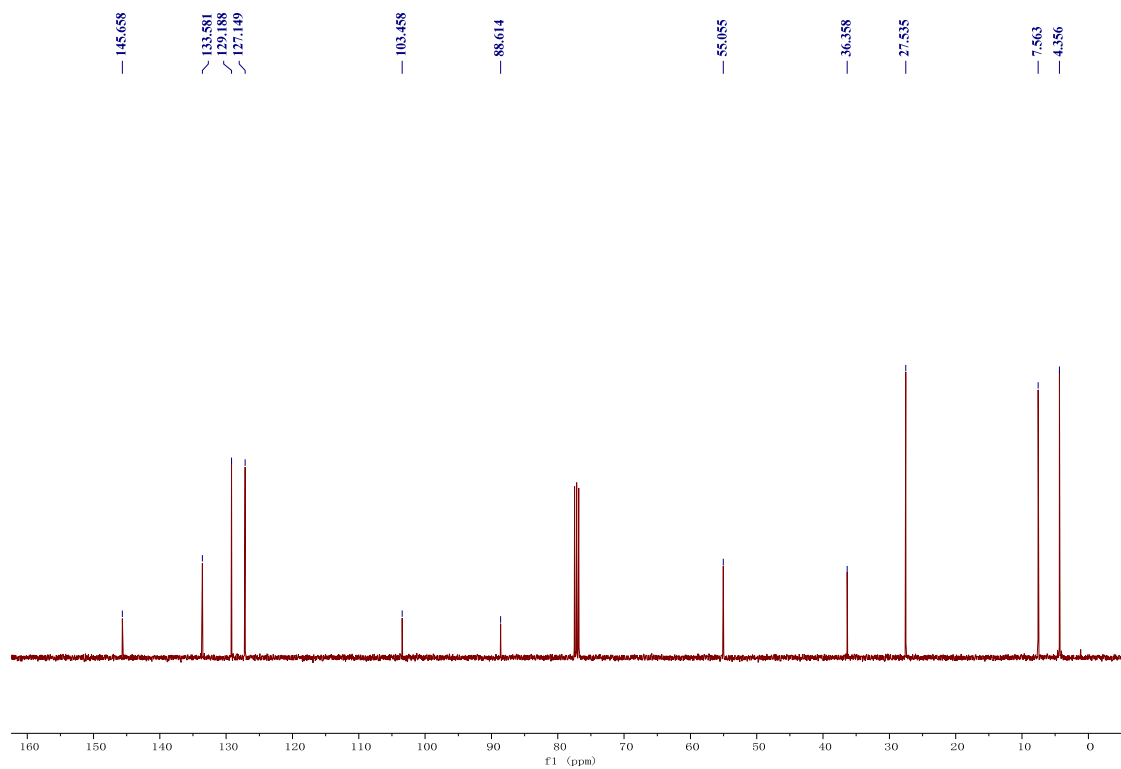

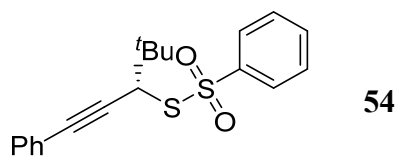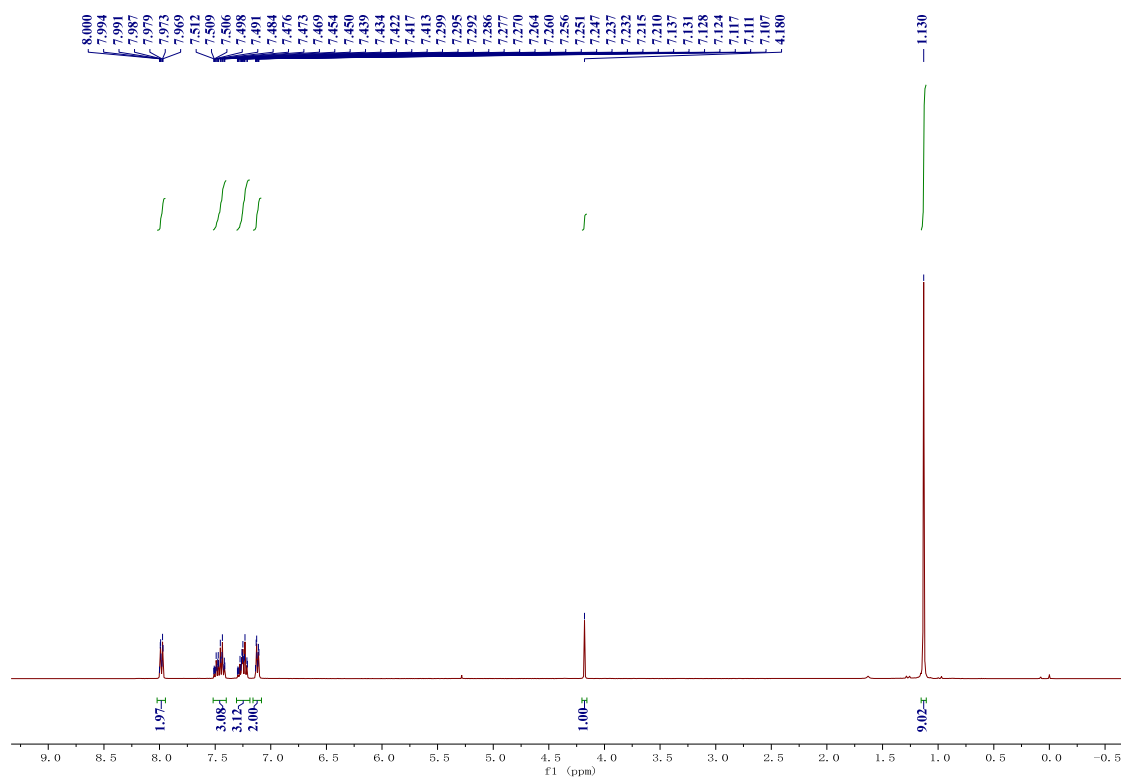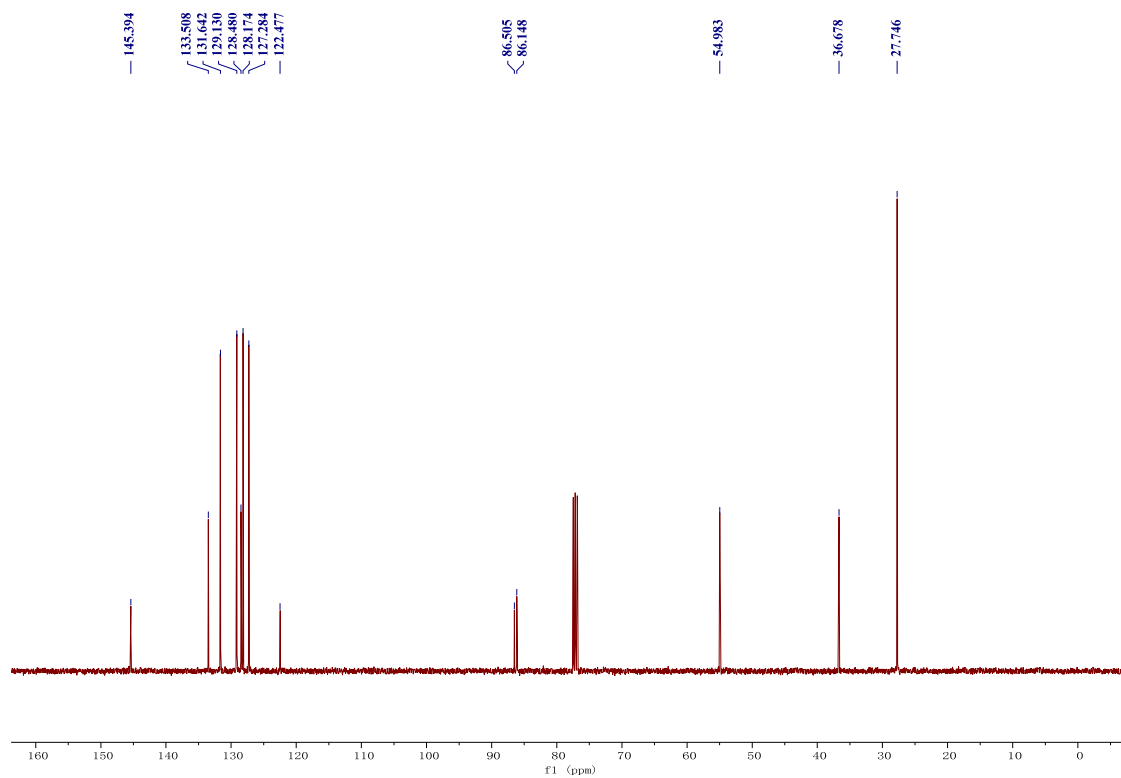



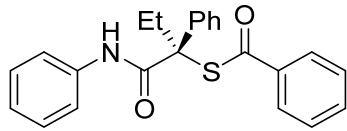

55

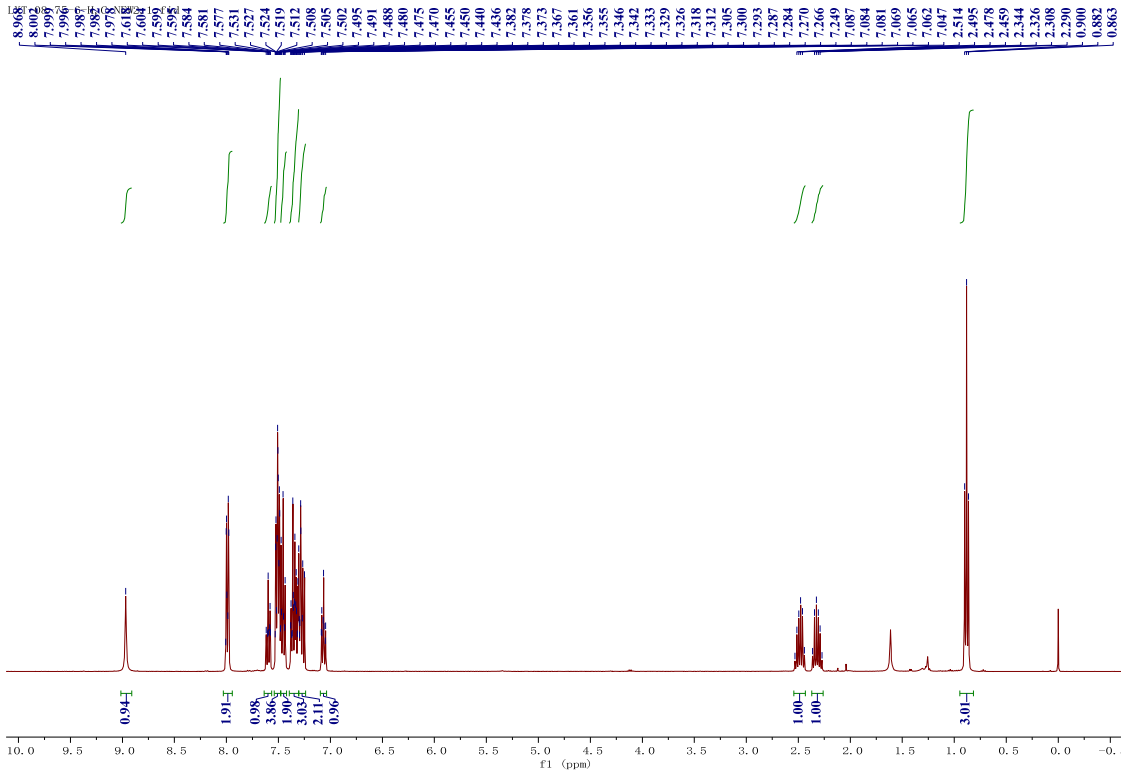

LXT-08-75-6-H<sub>2</sub>O\_NEW2.2.f1d

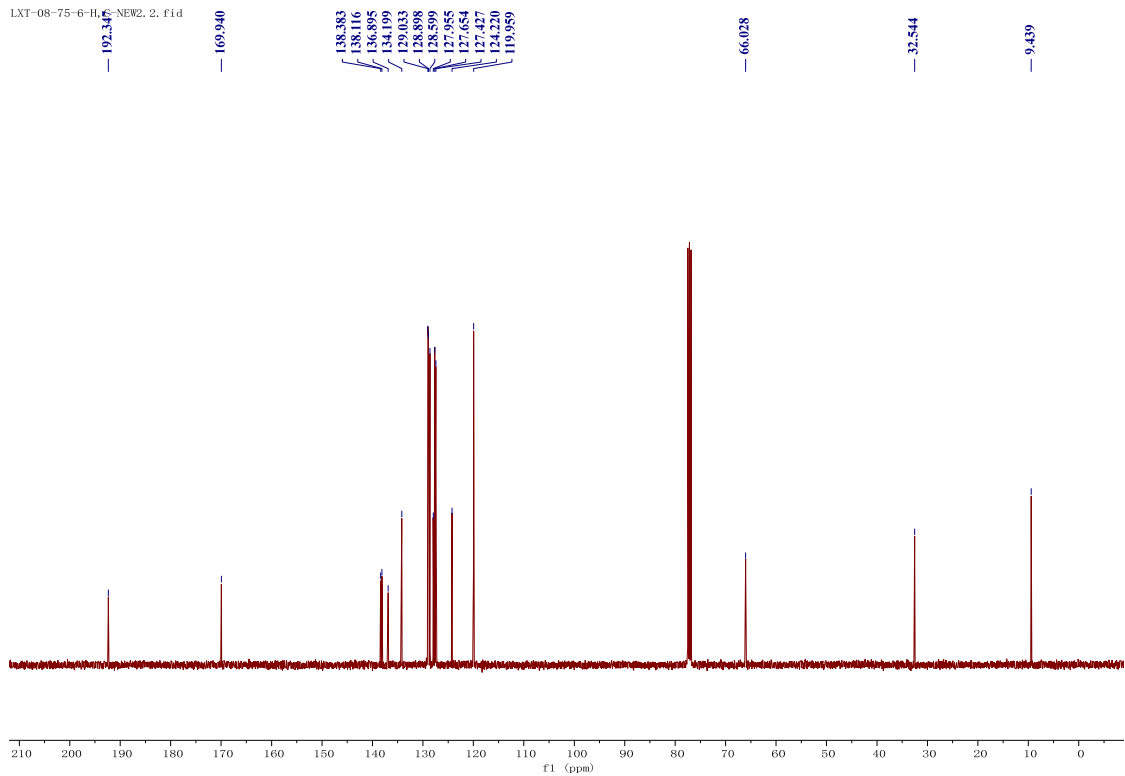

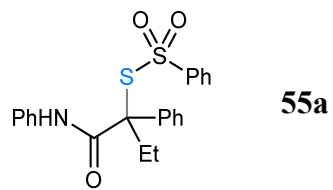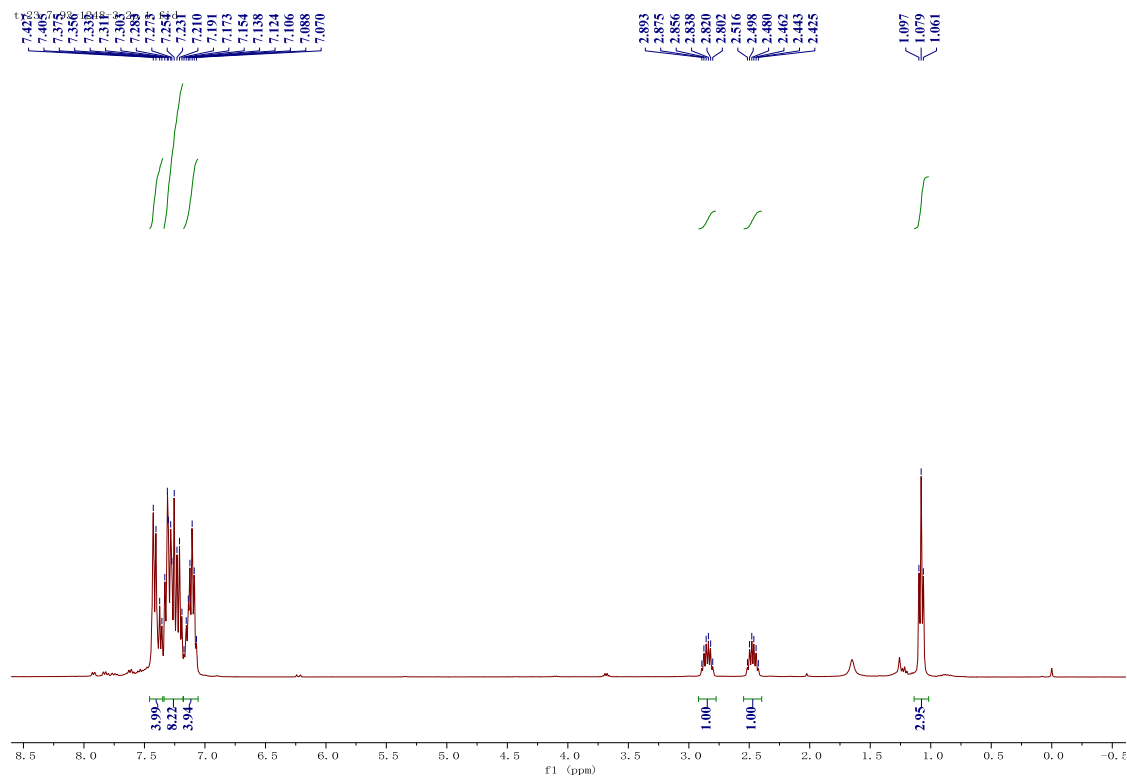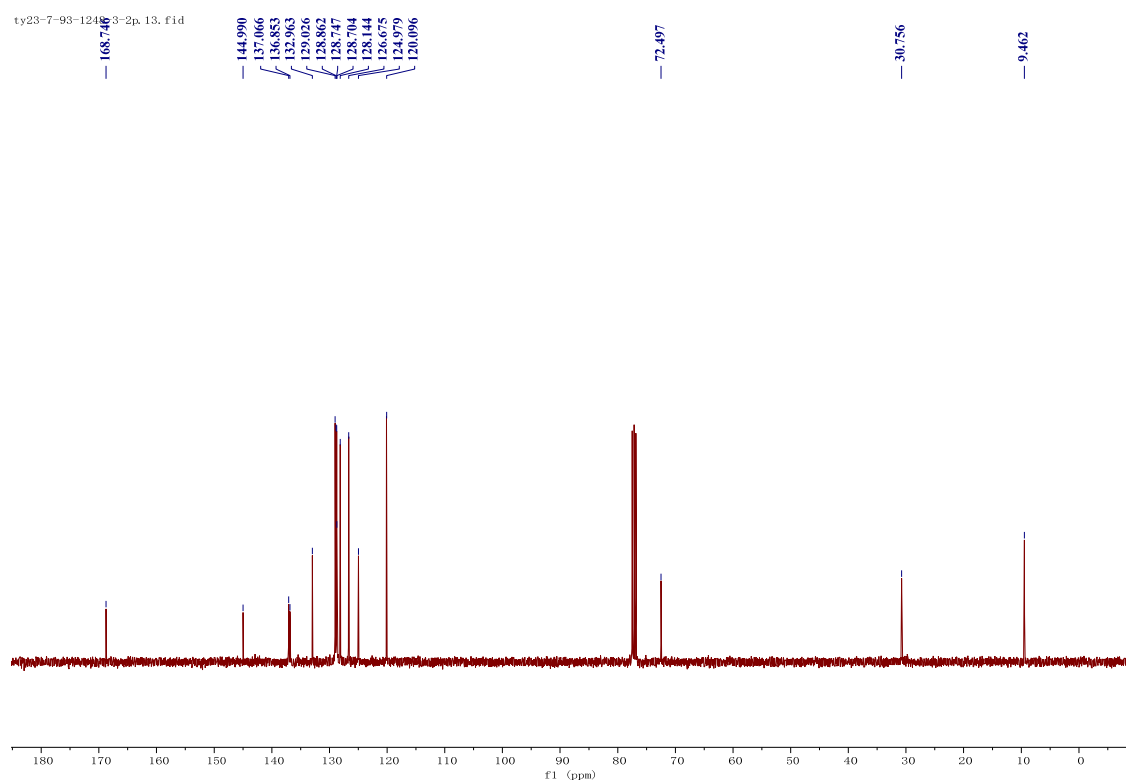

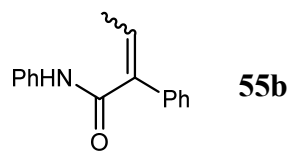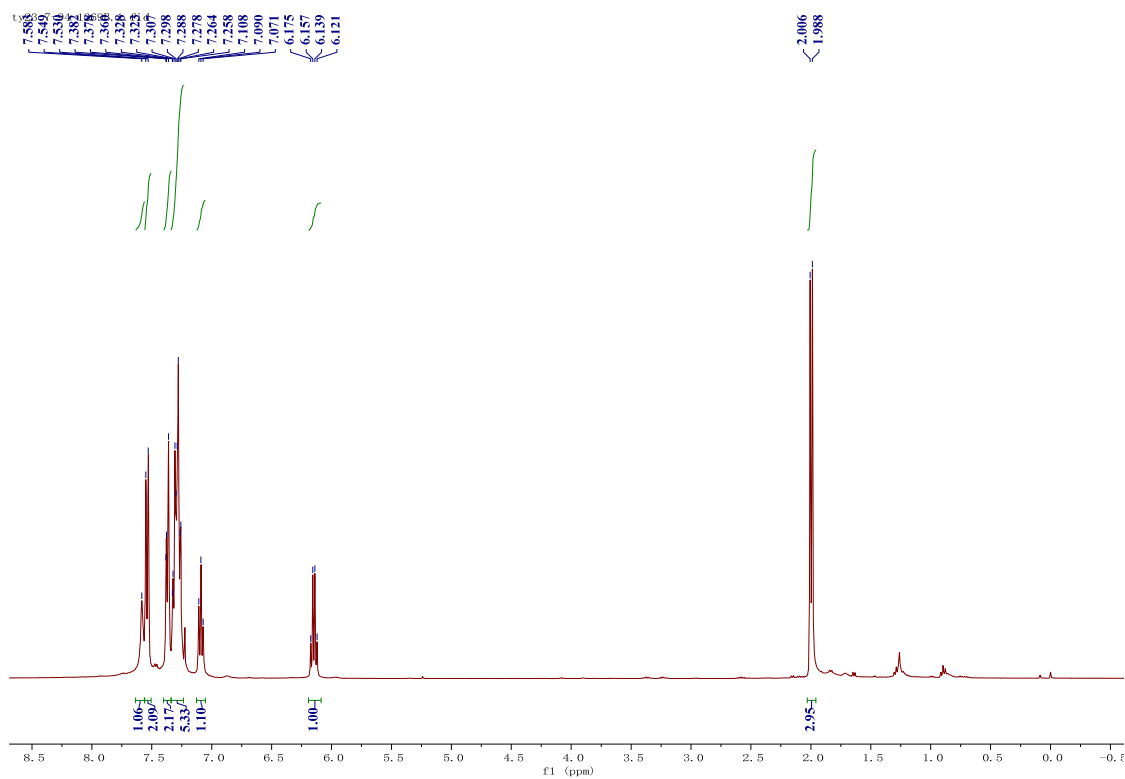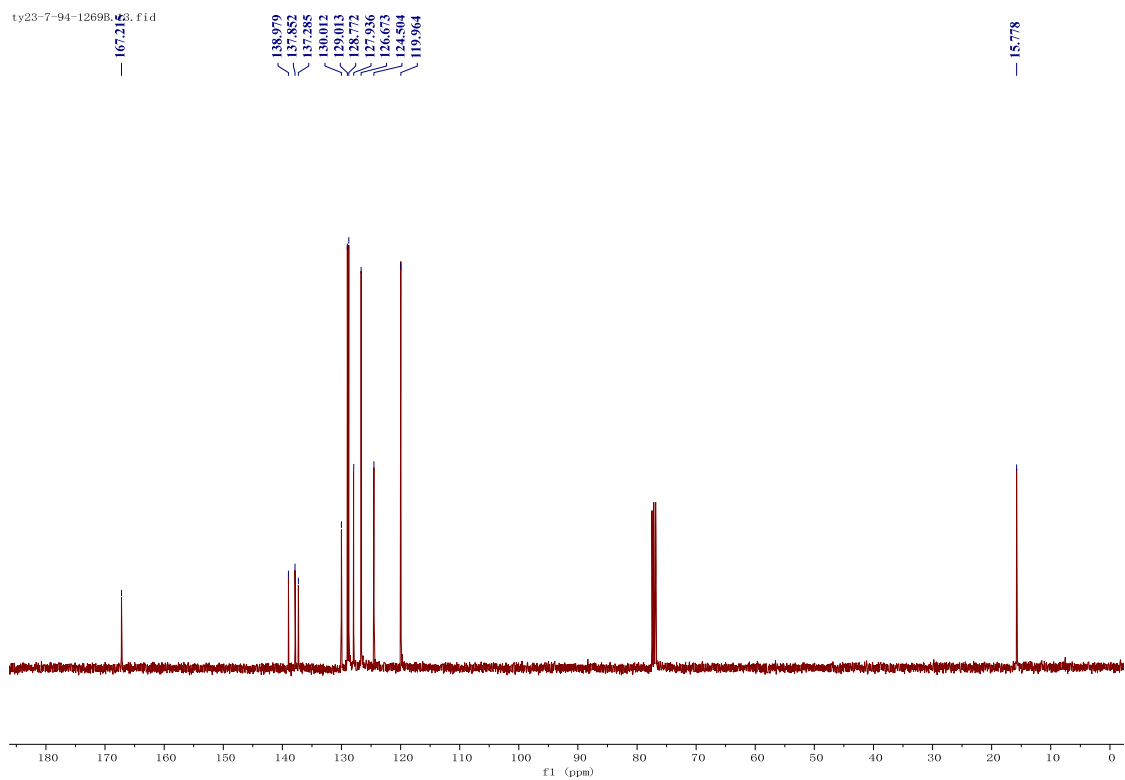

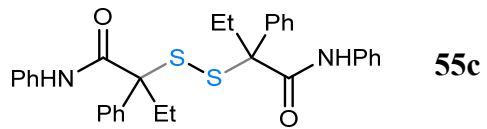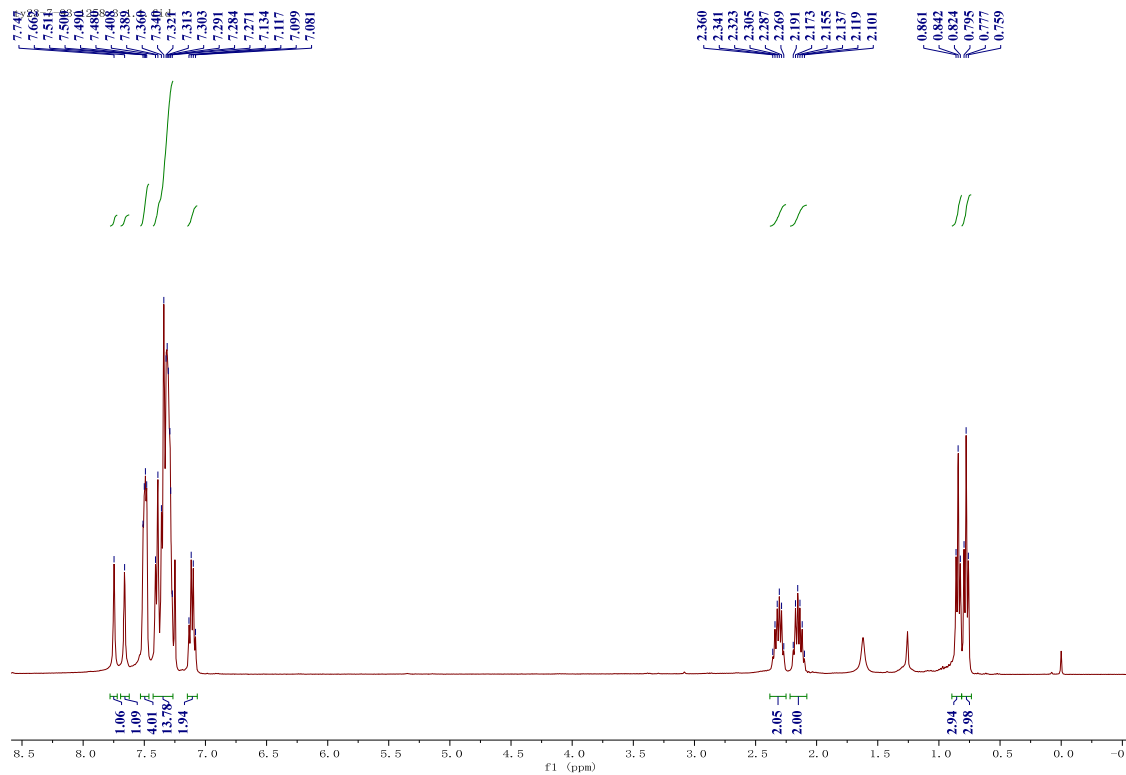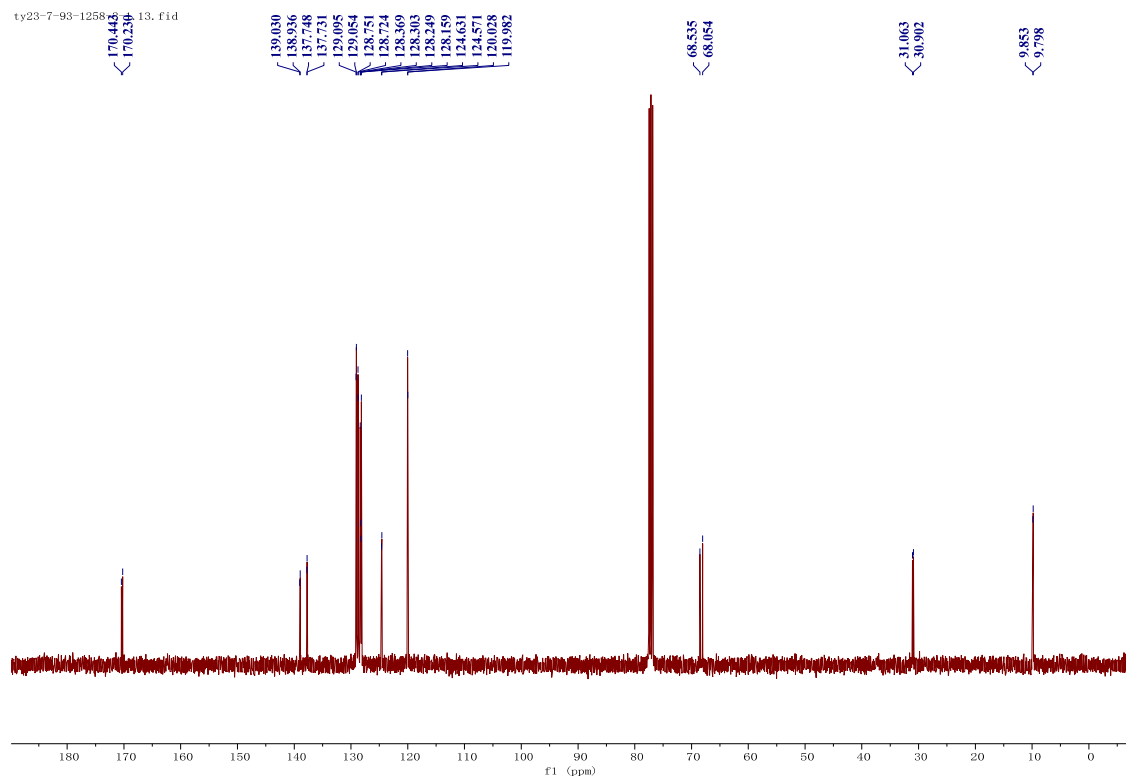

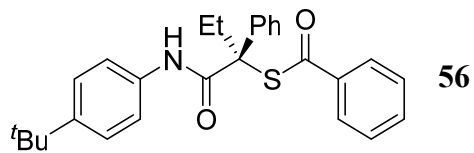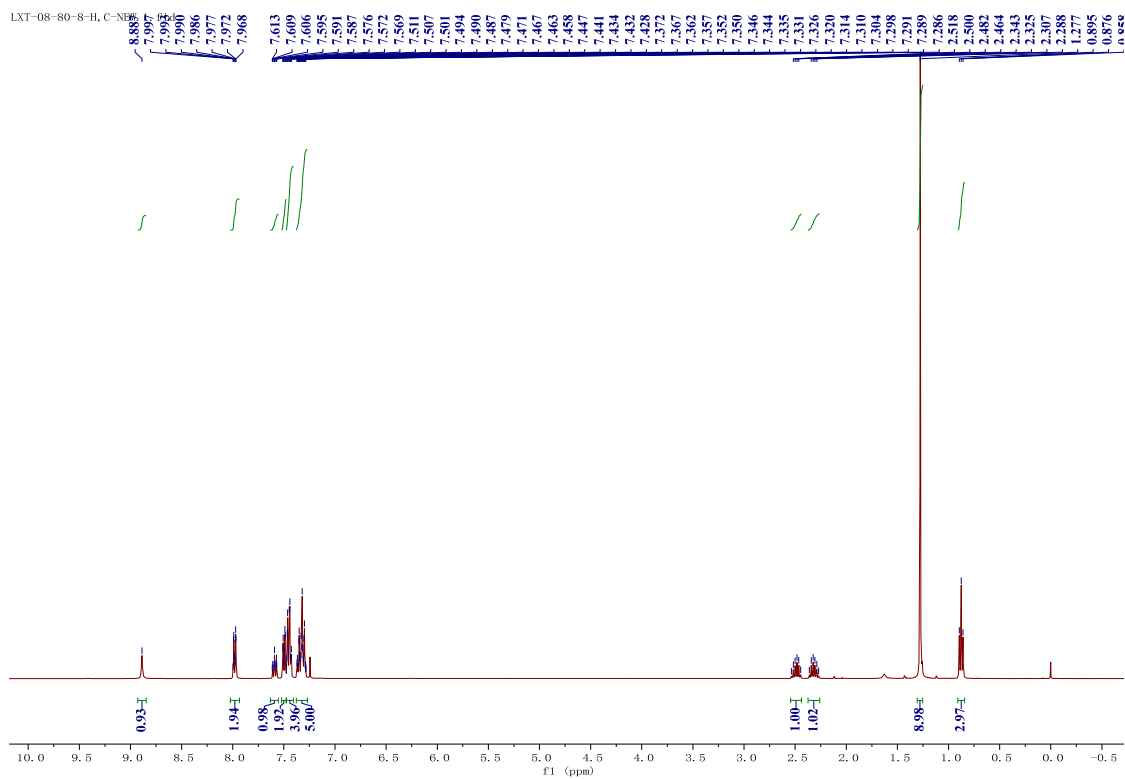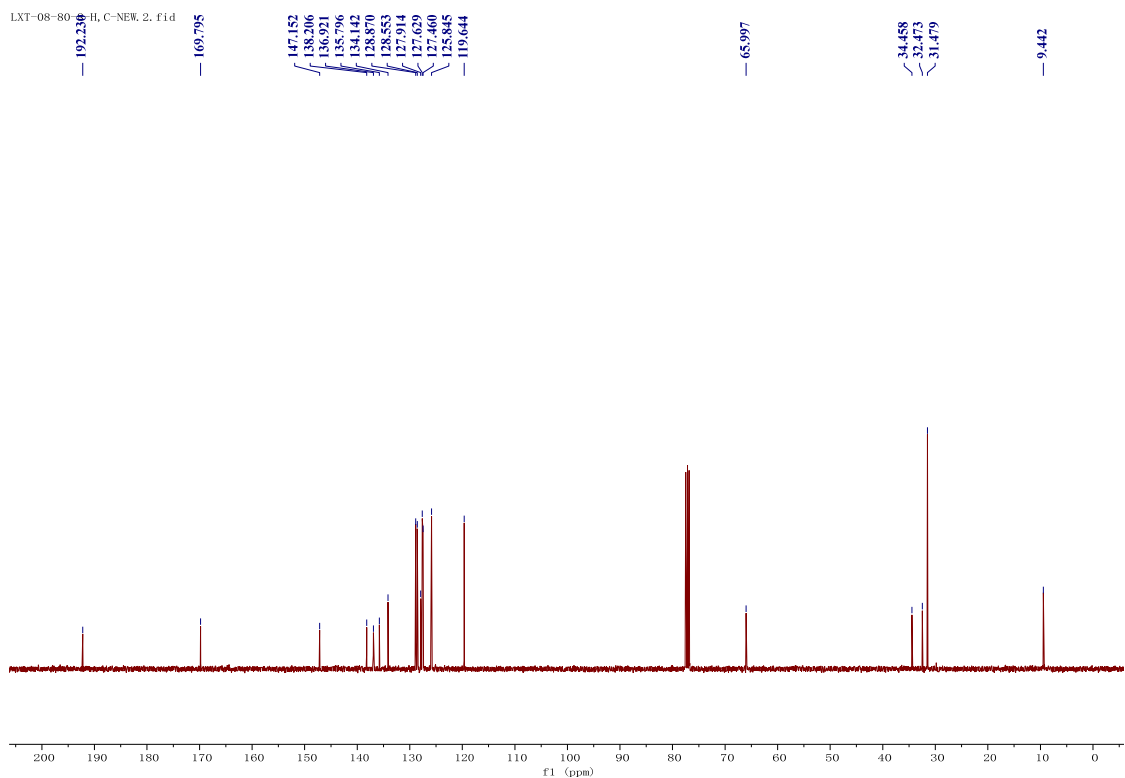



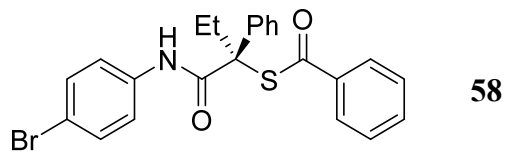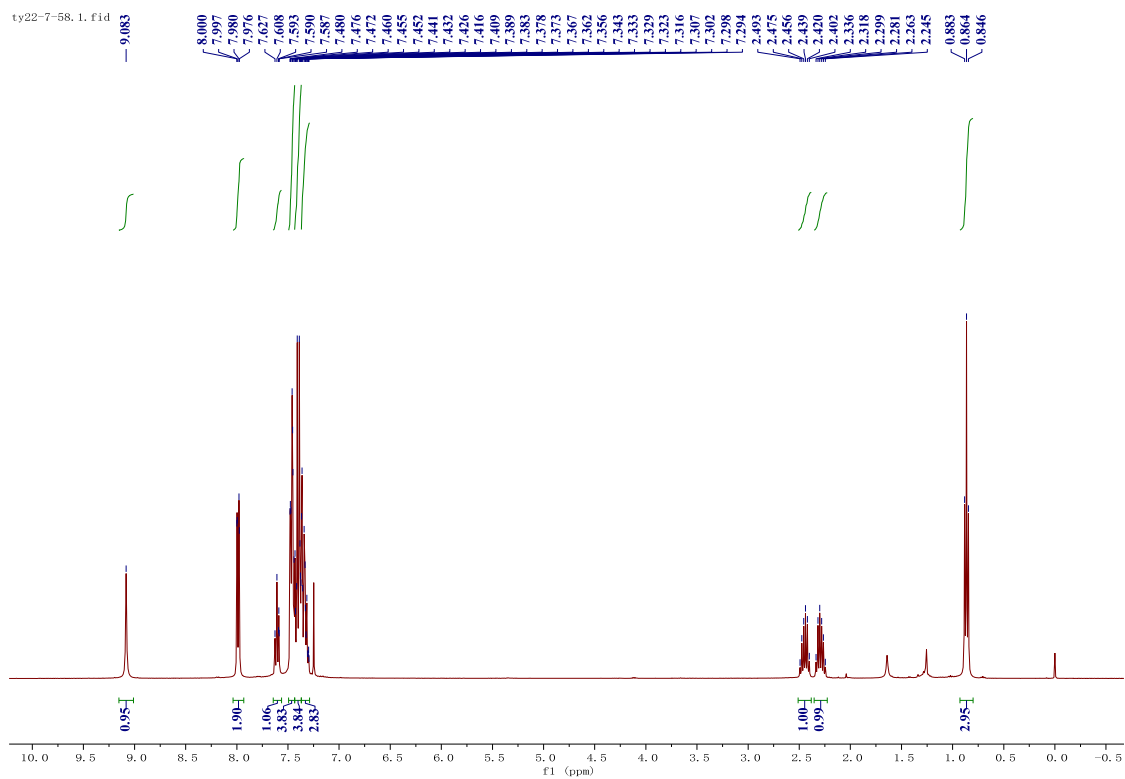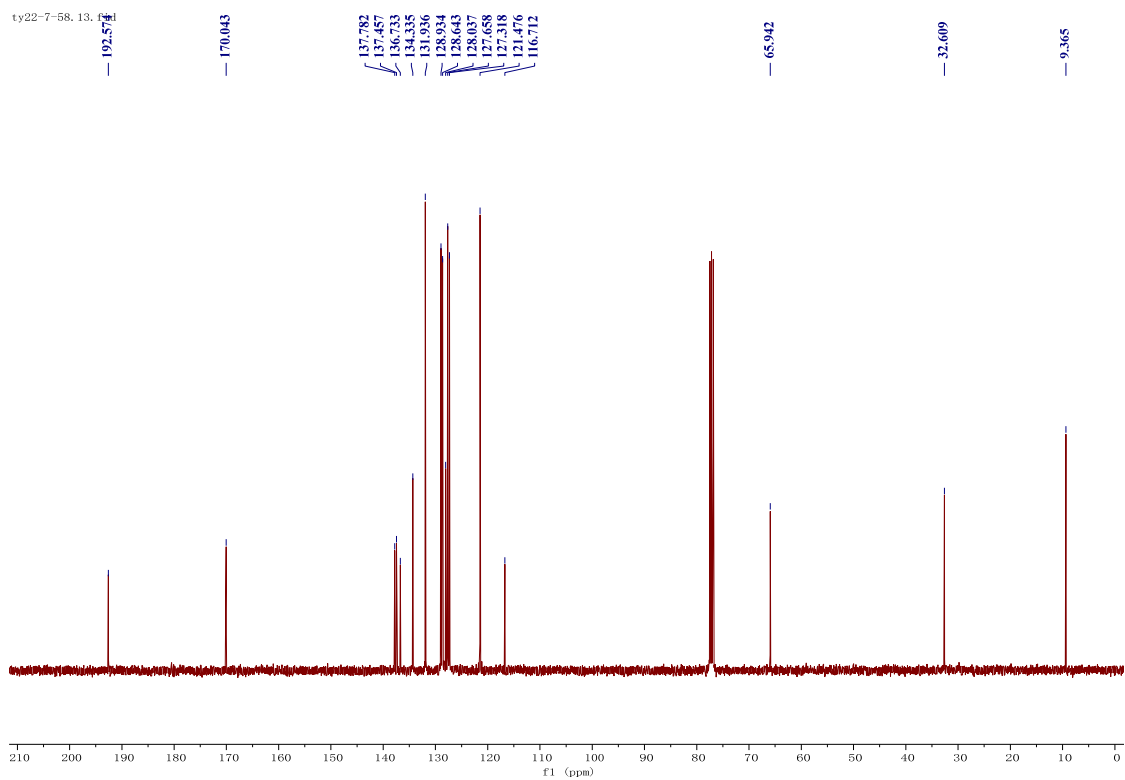

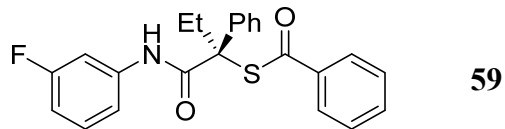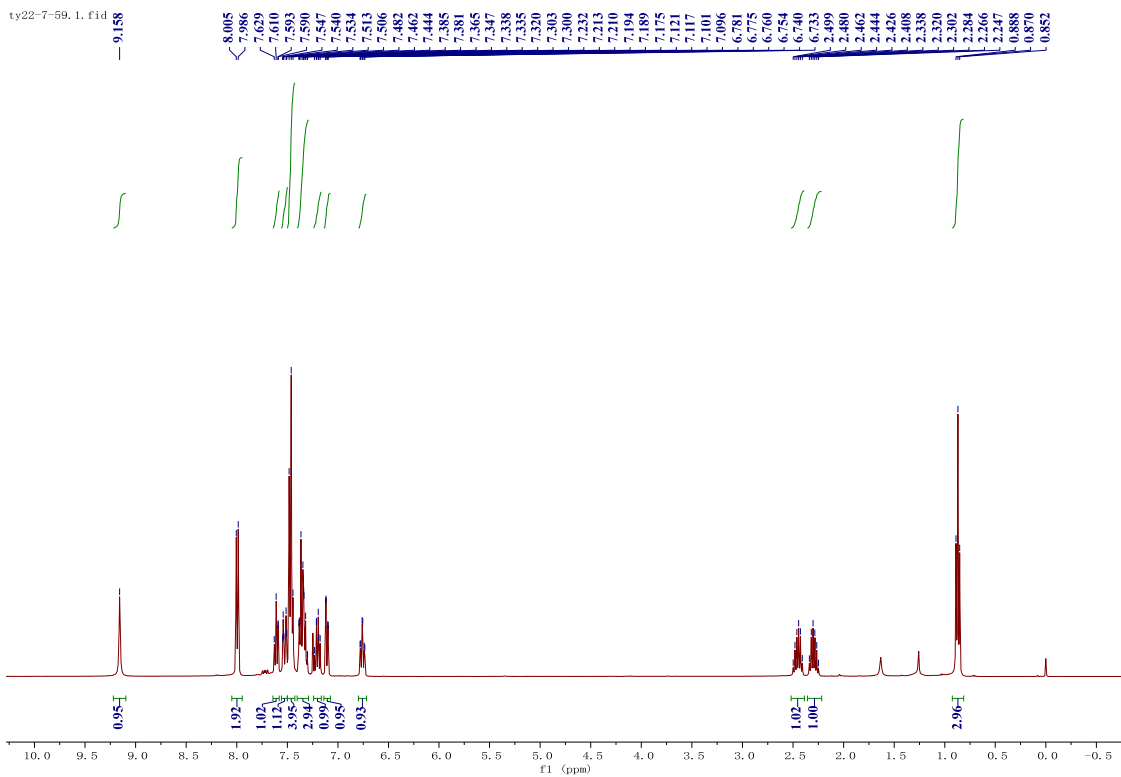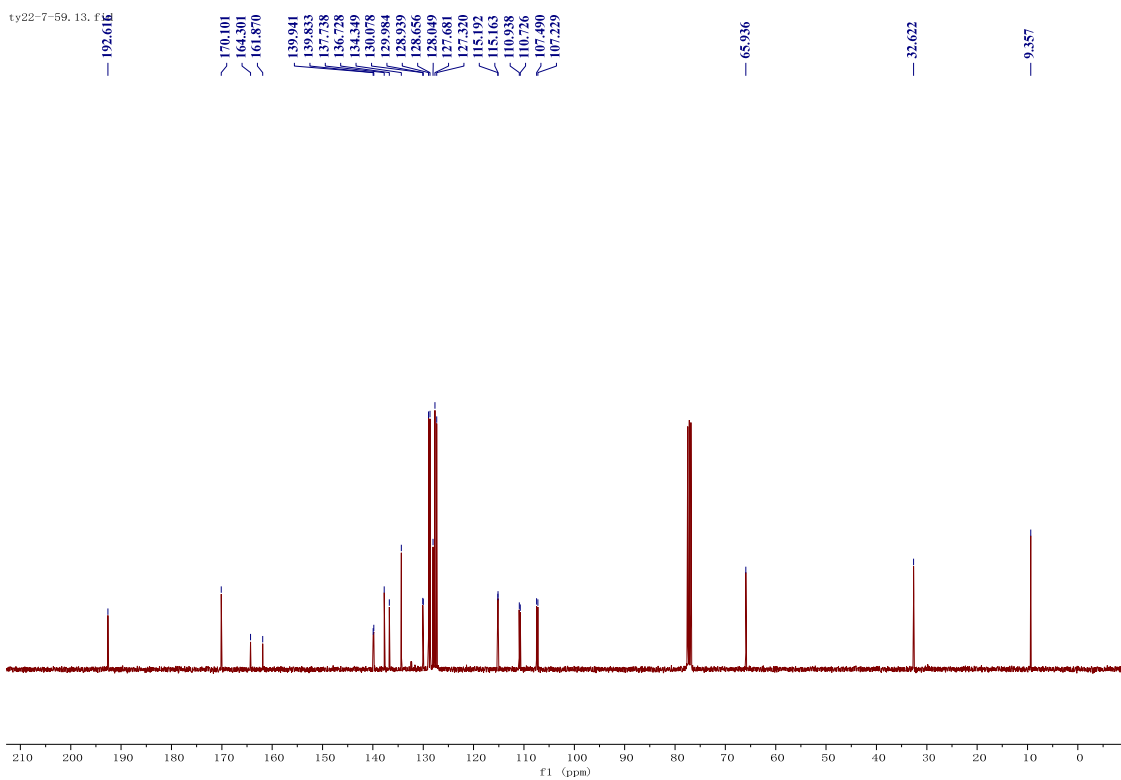



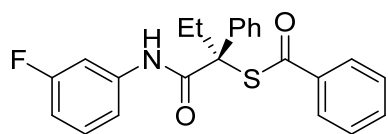

59

ty22-7-59. 19. fid

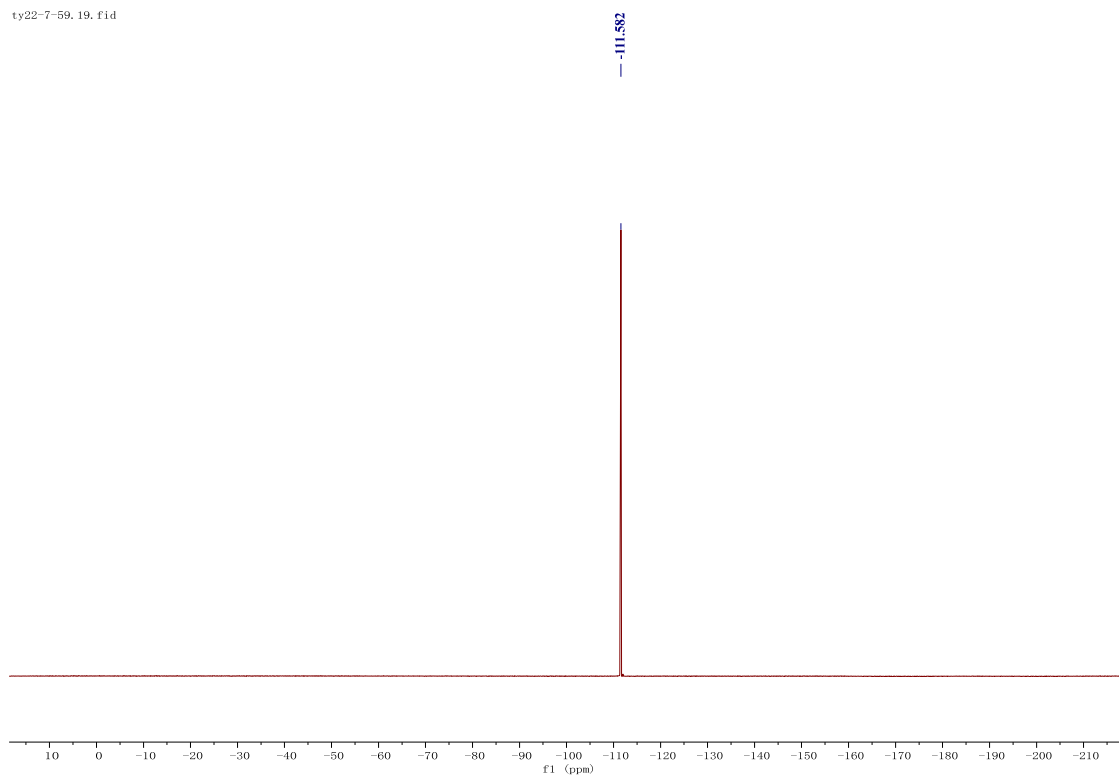

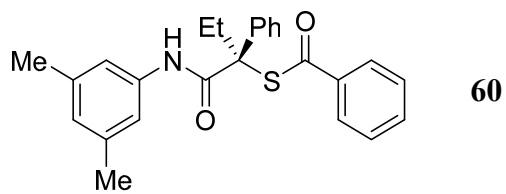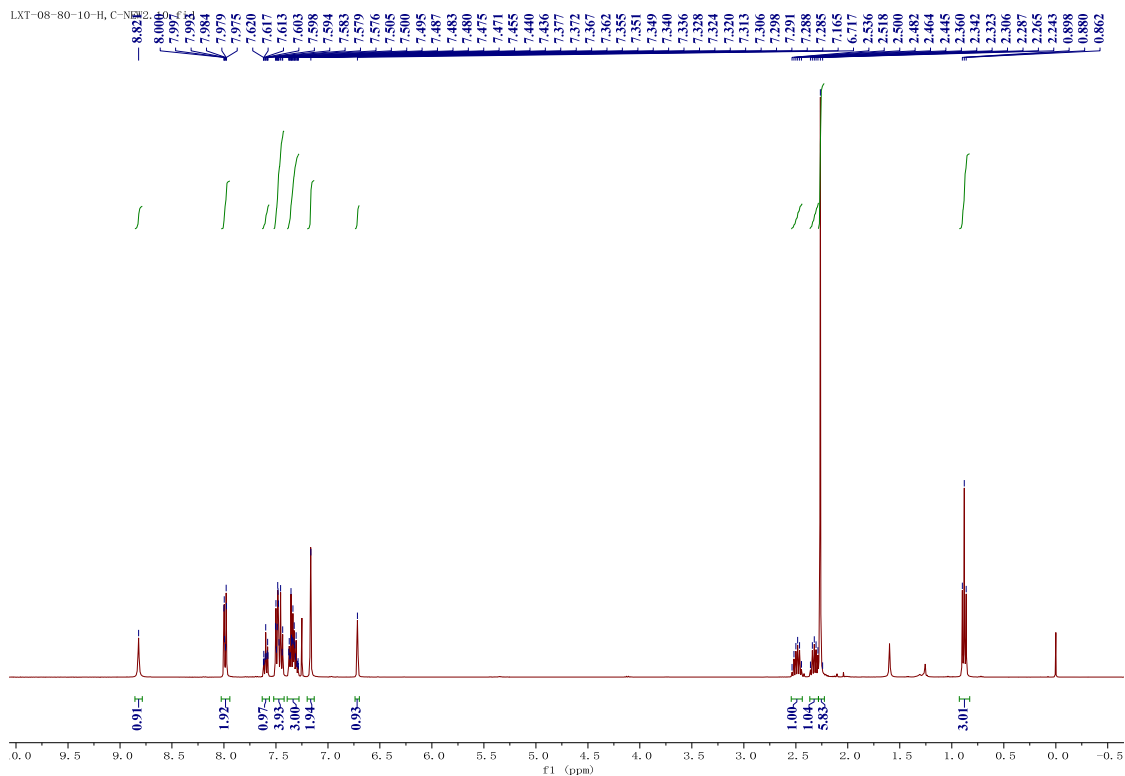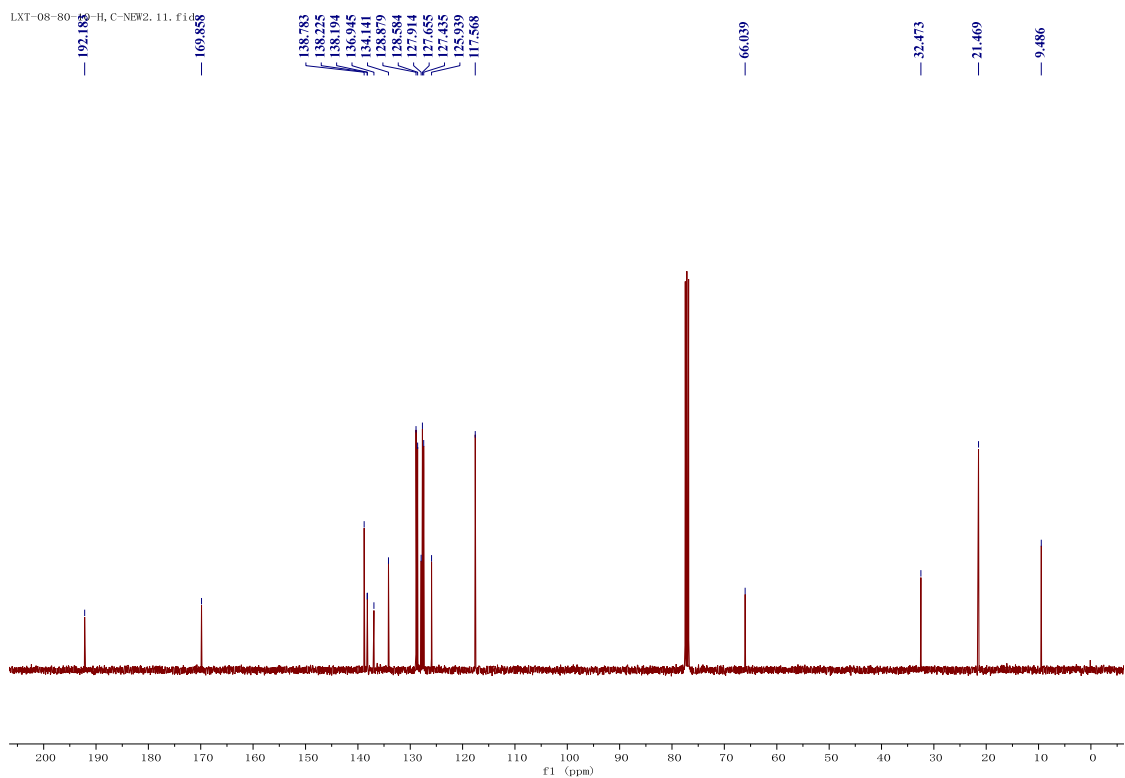

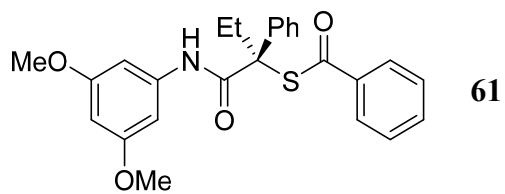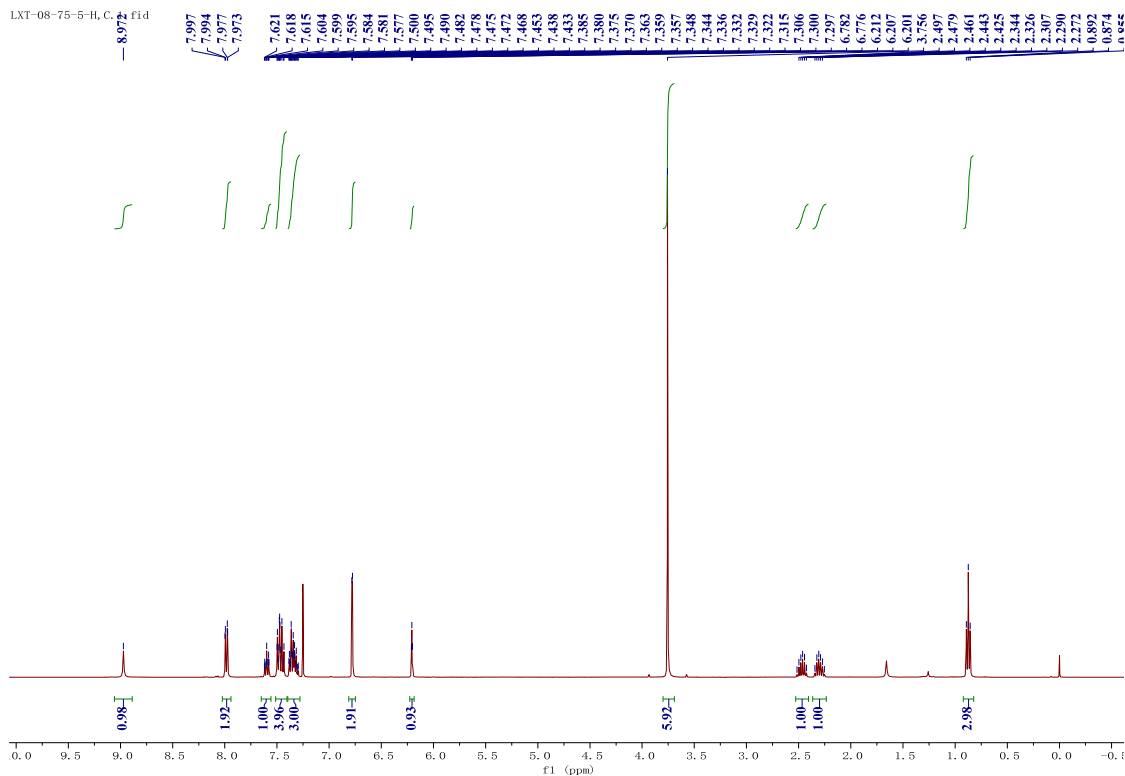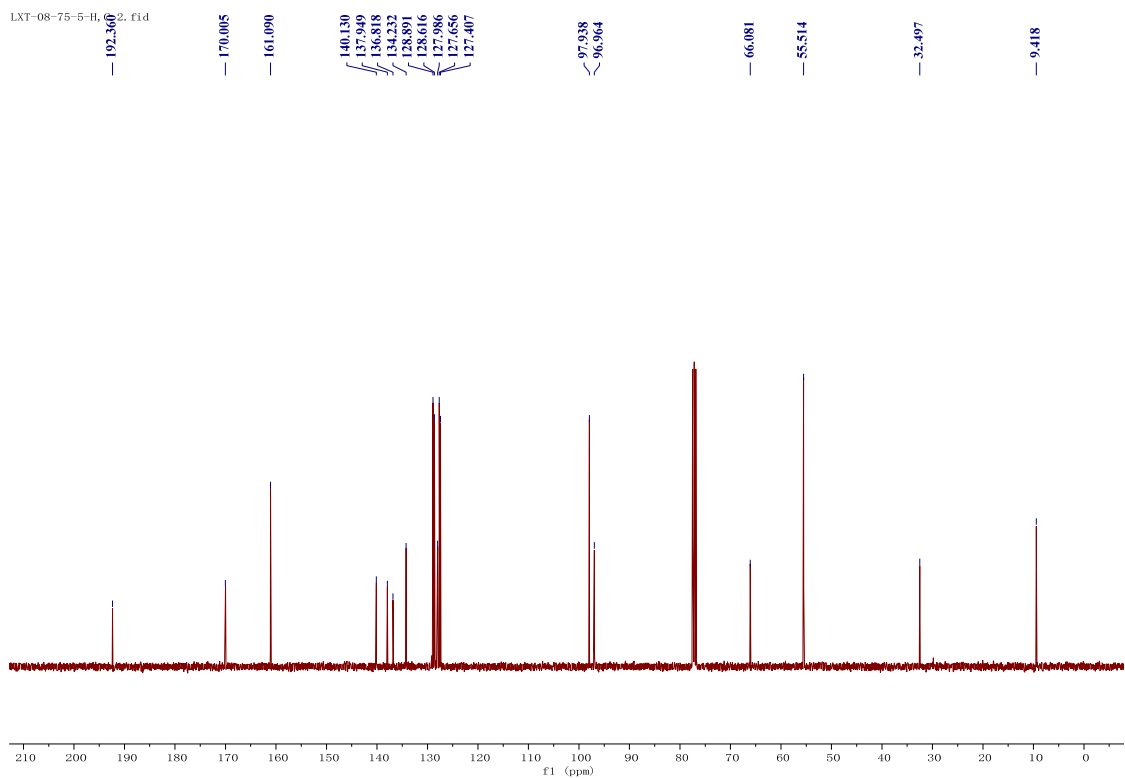

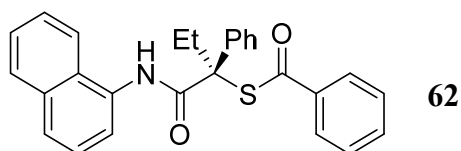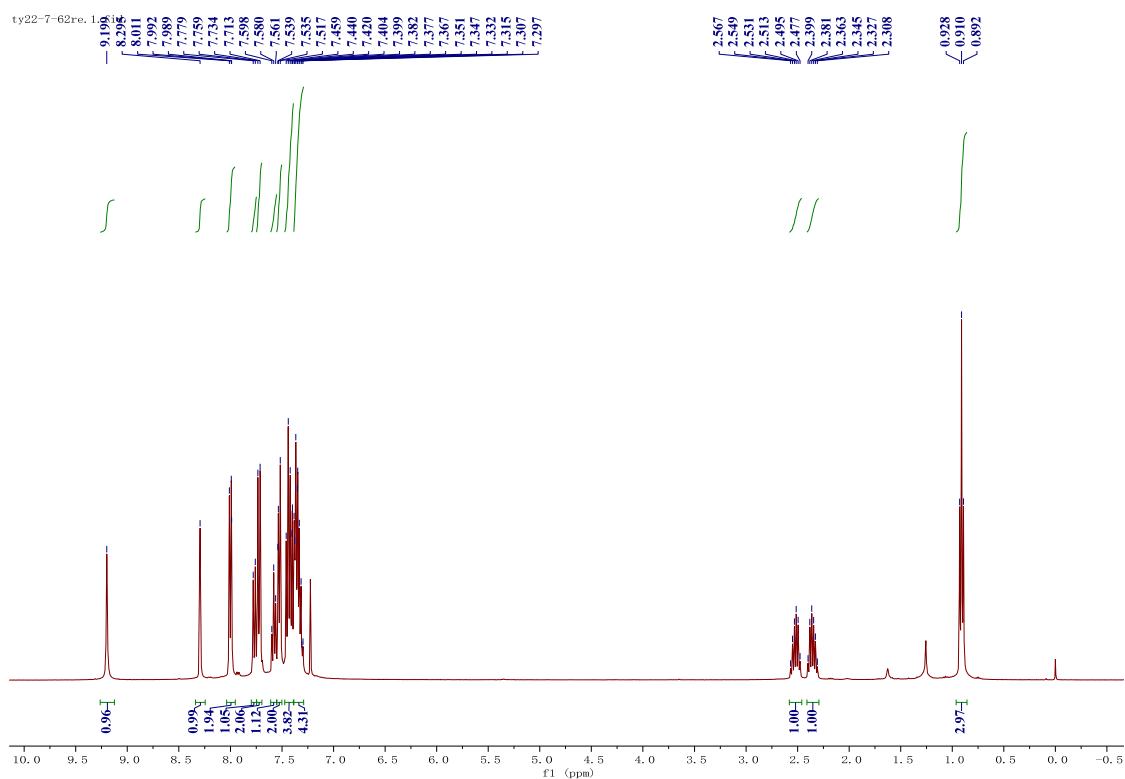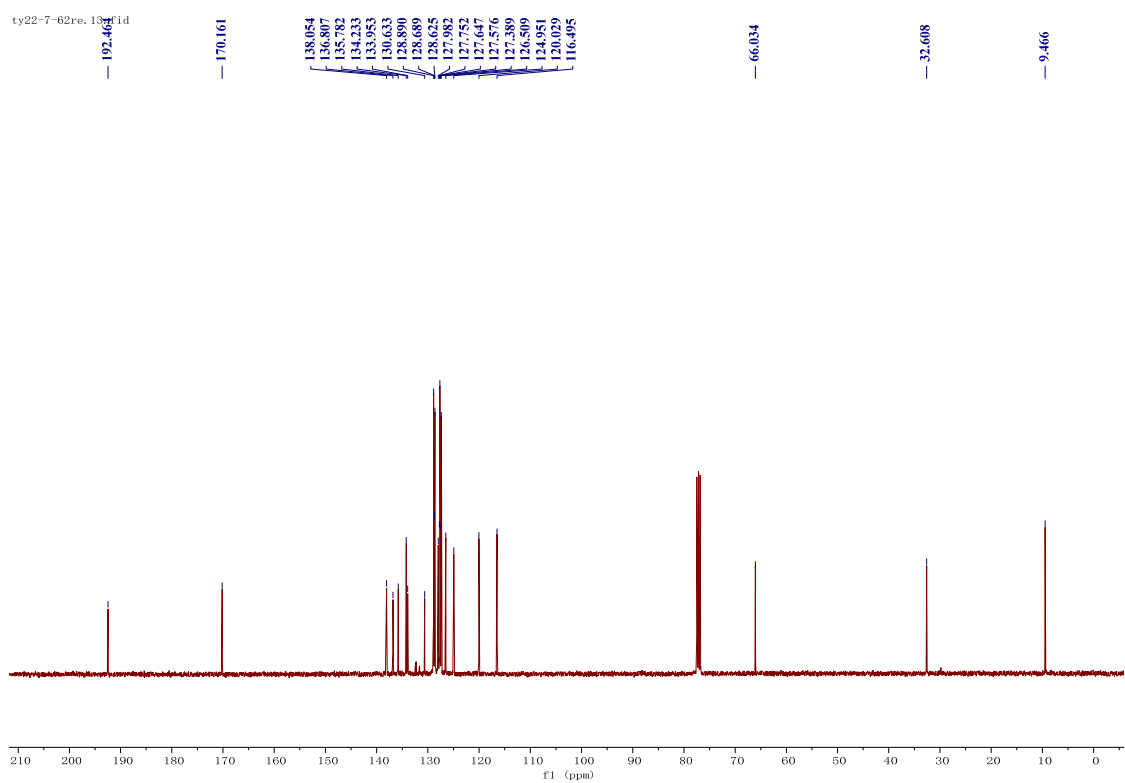

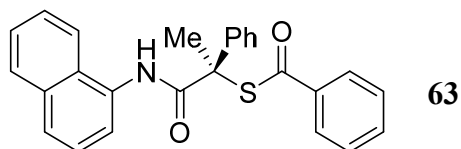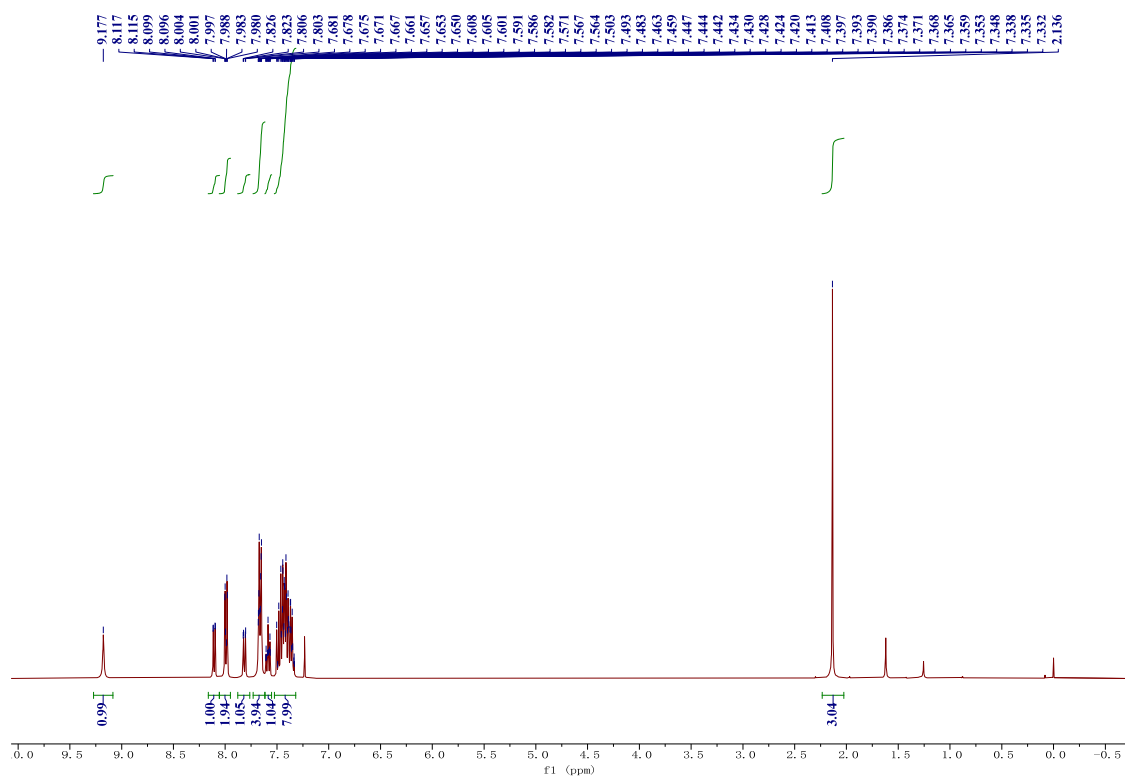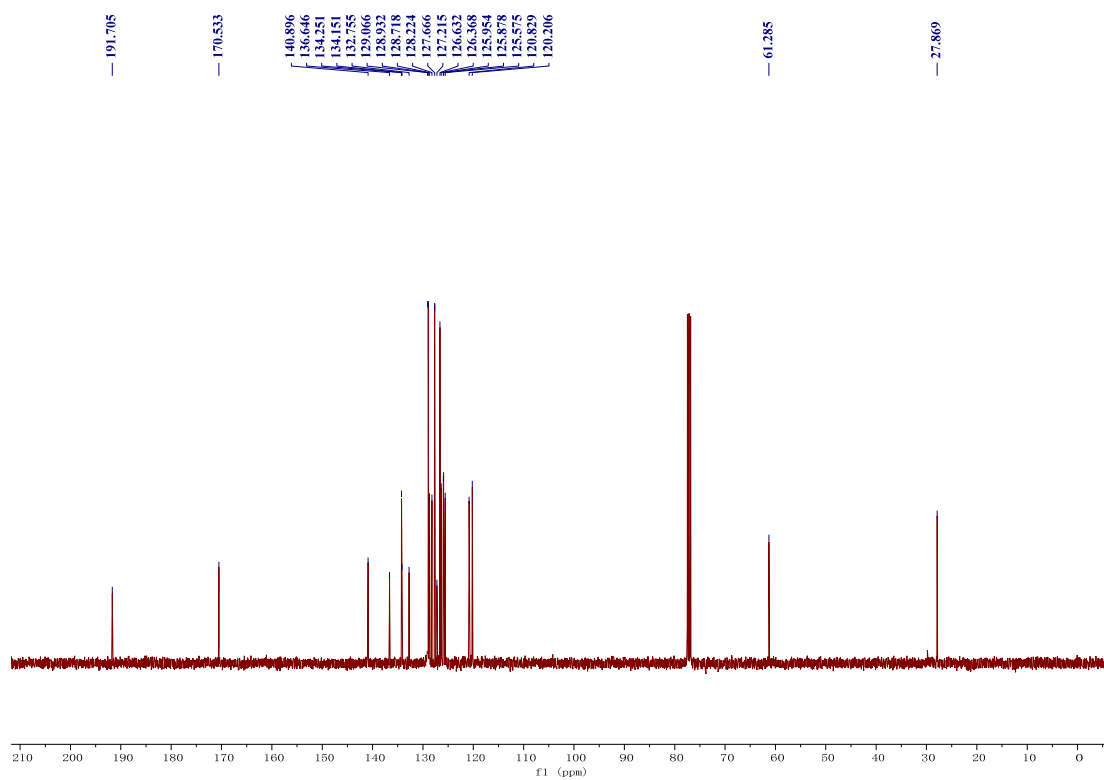

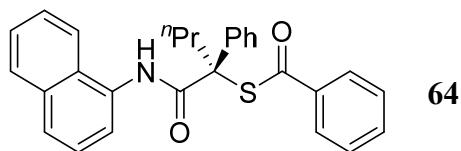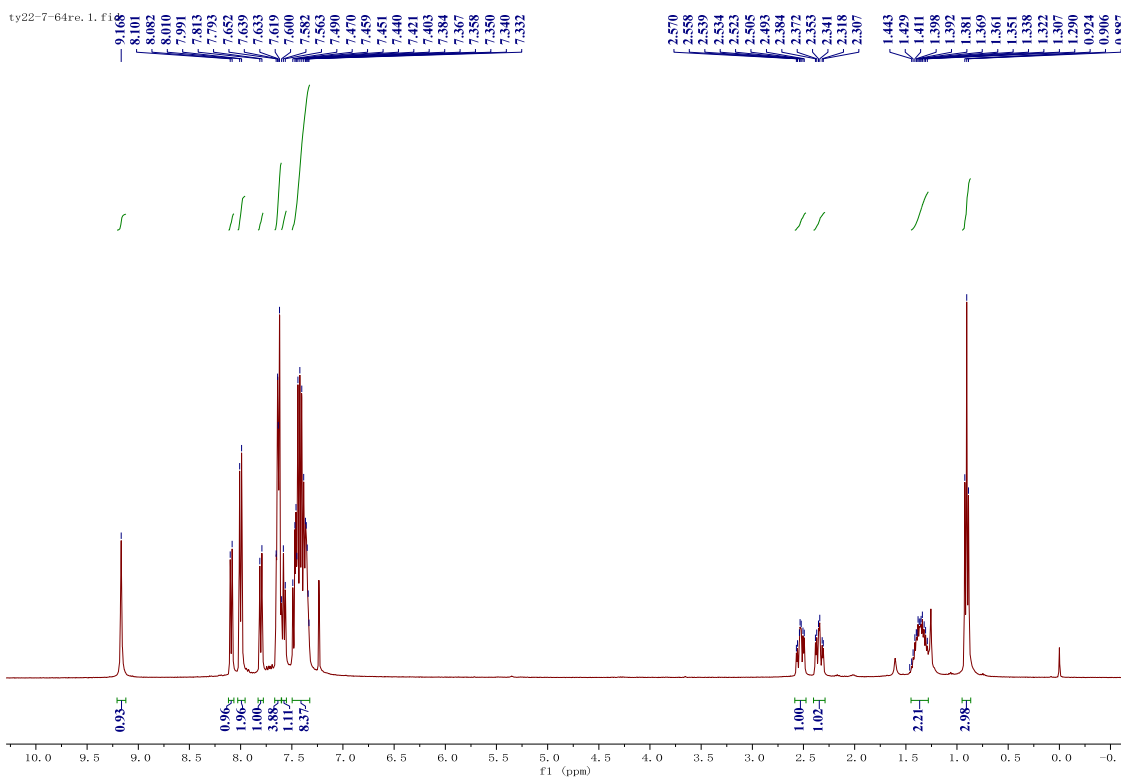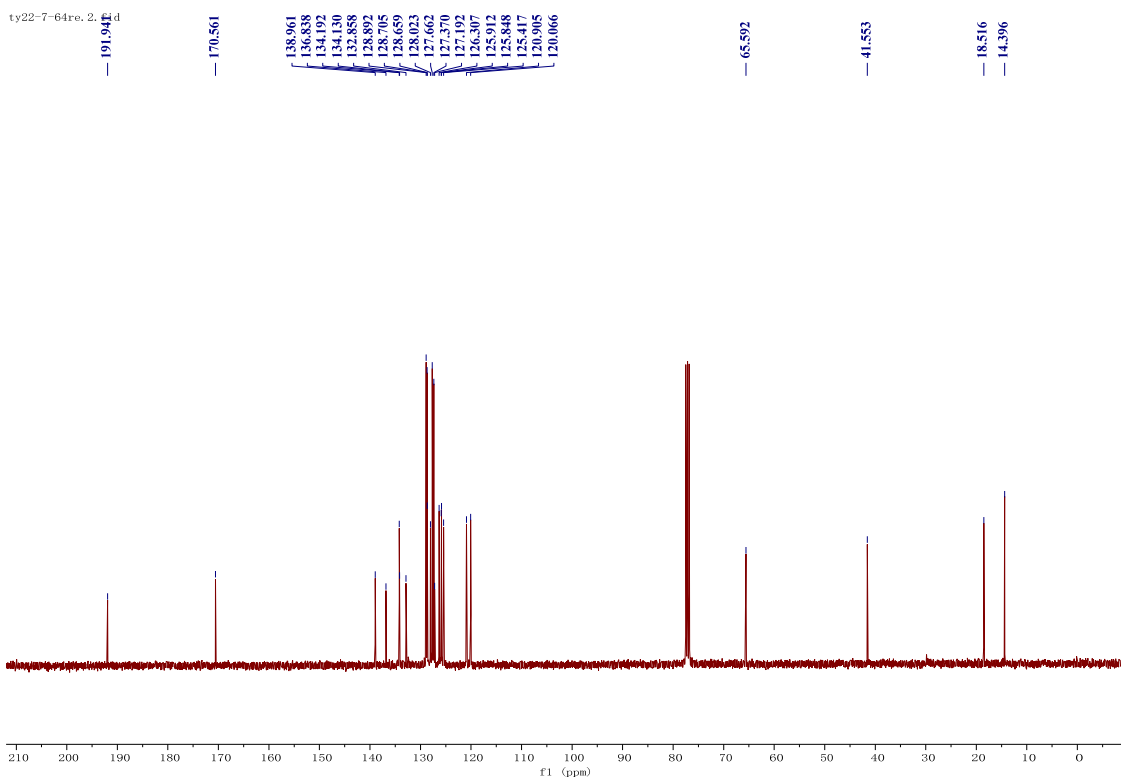

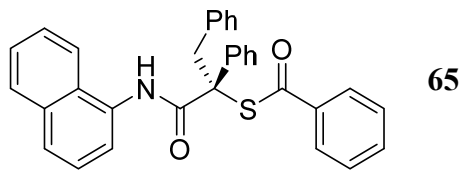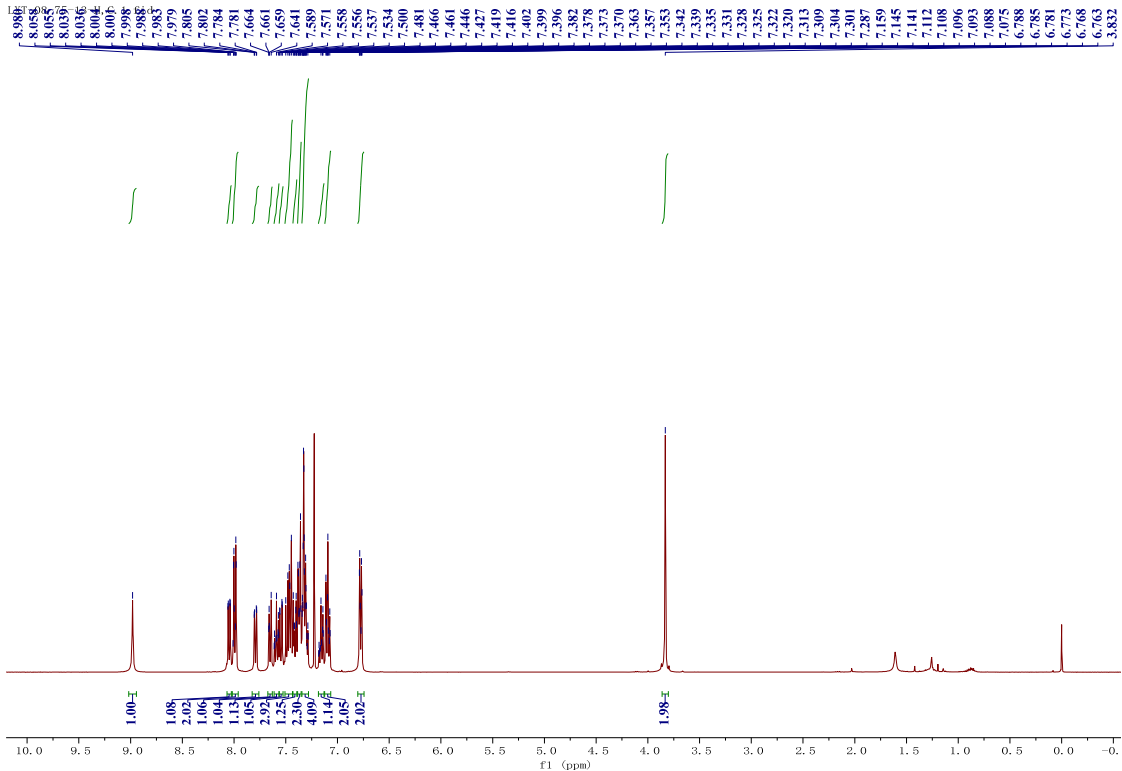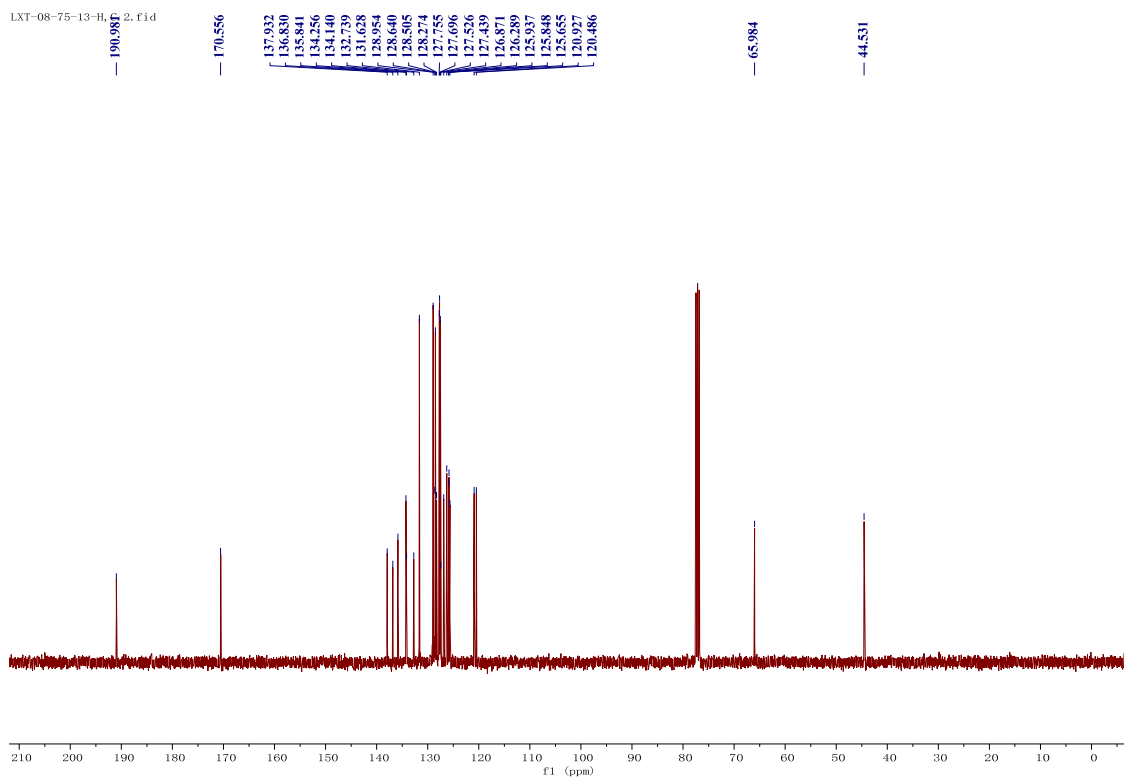

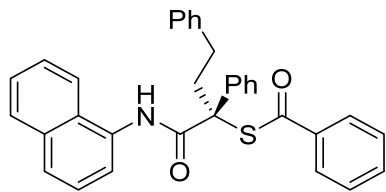

66

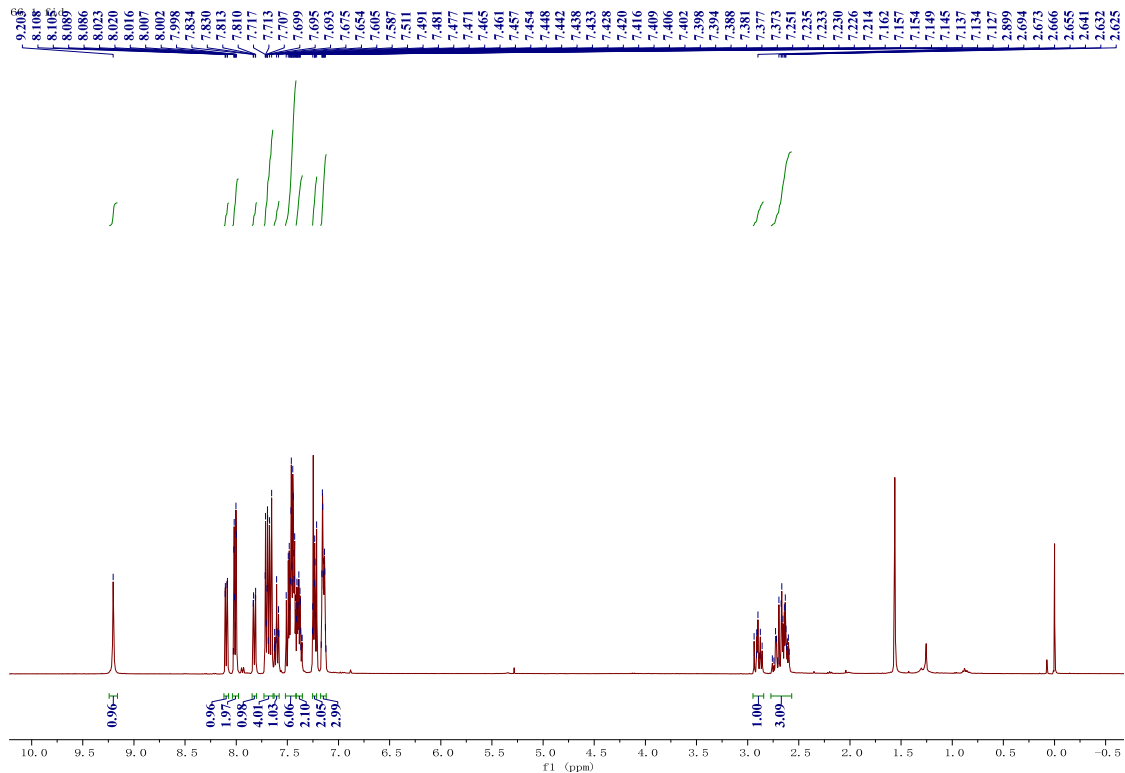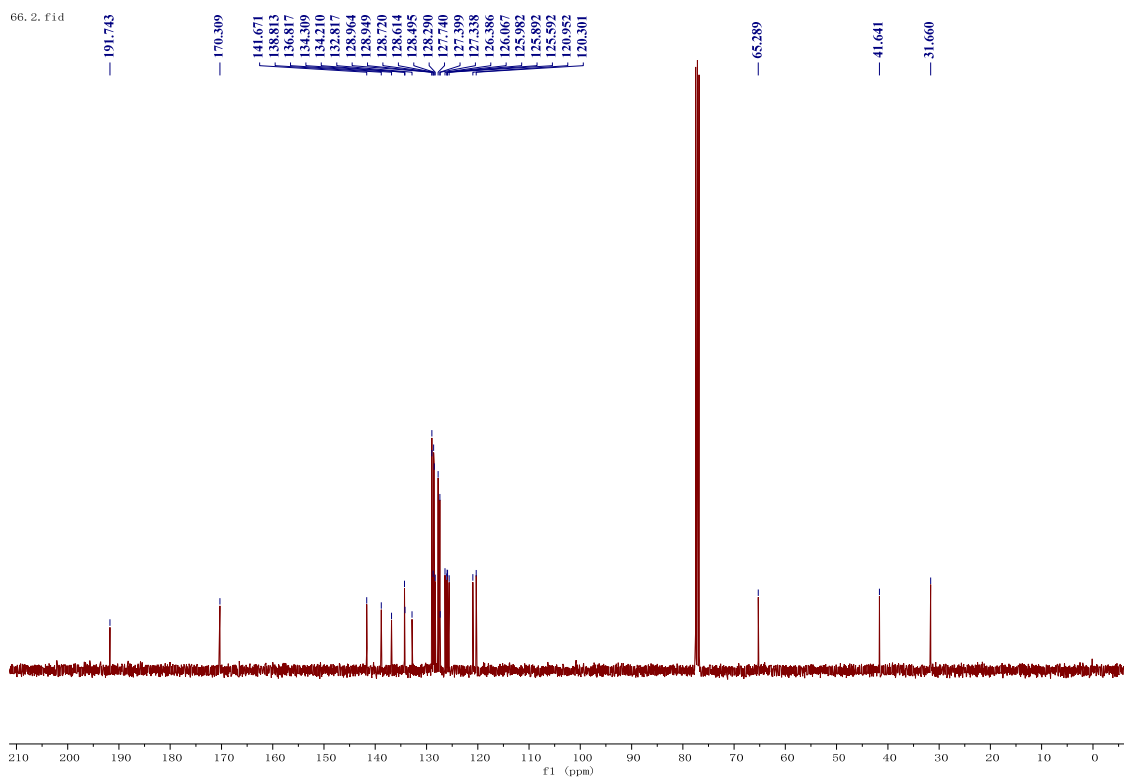



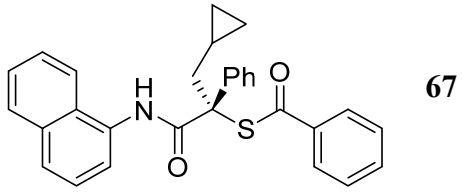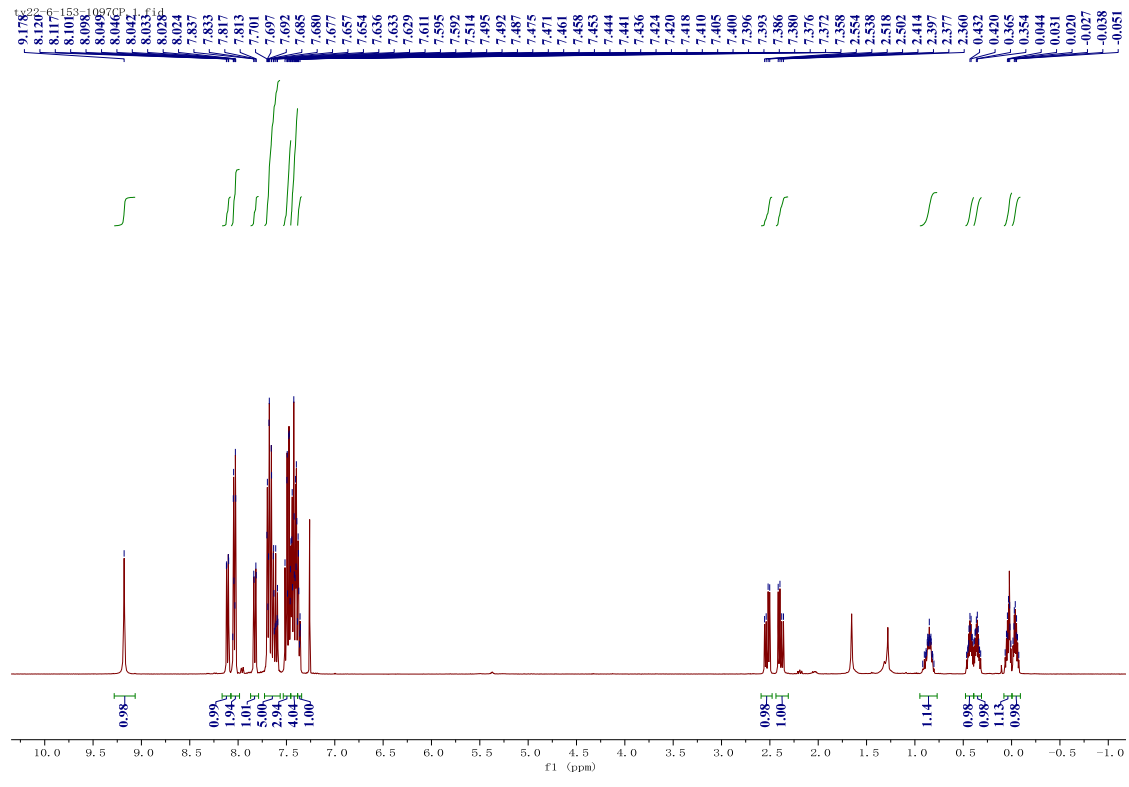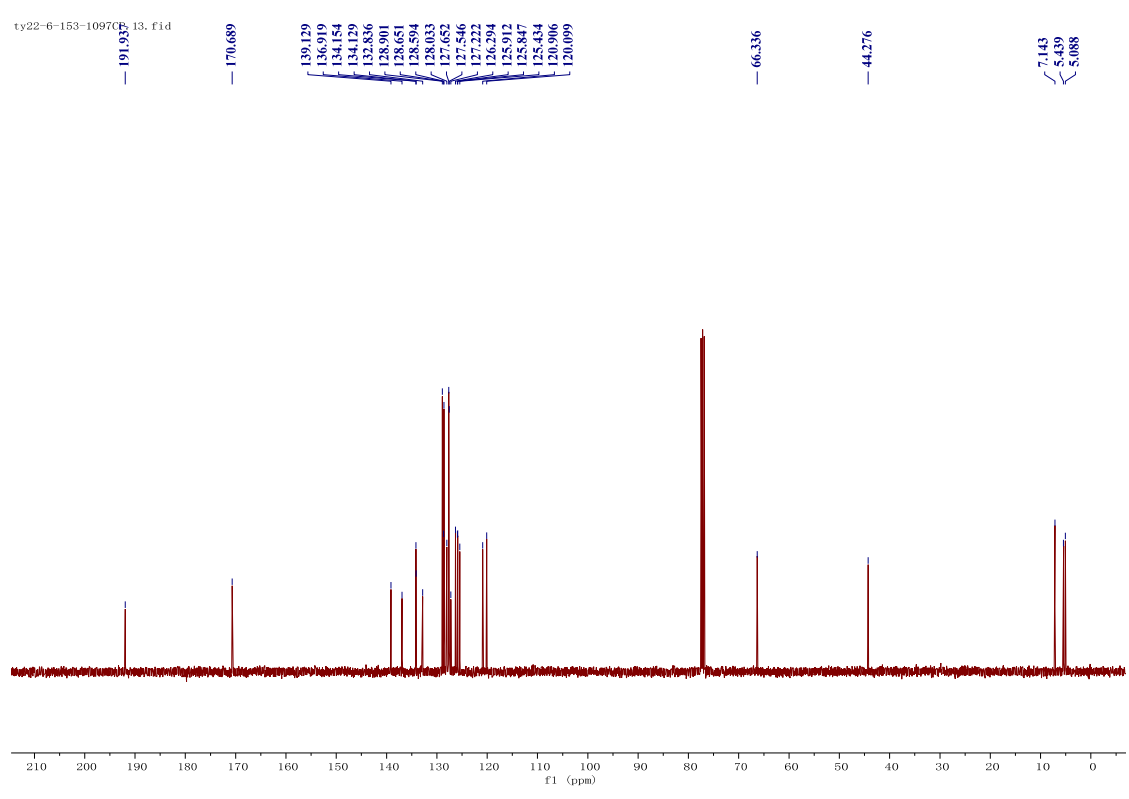

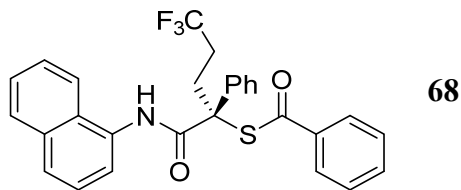

68

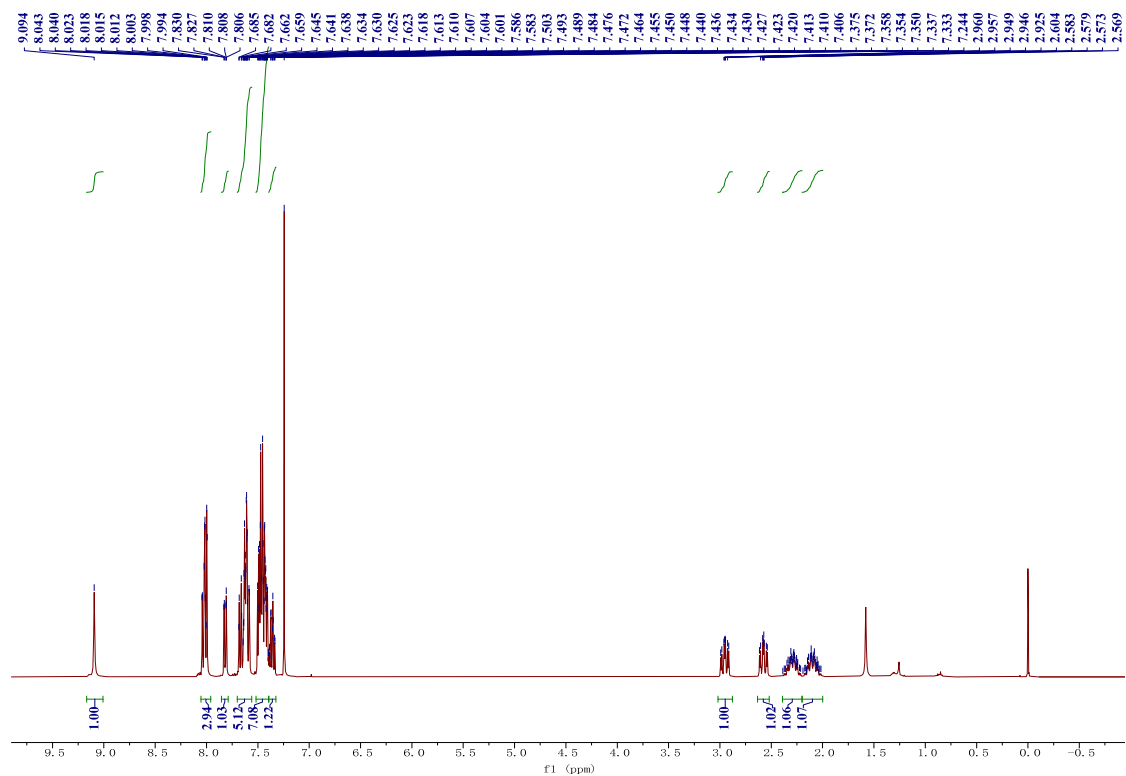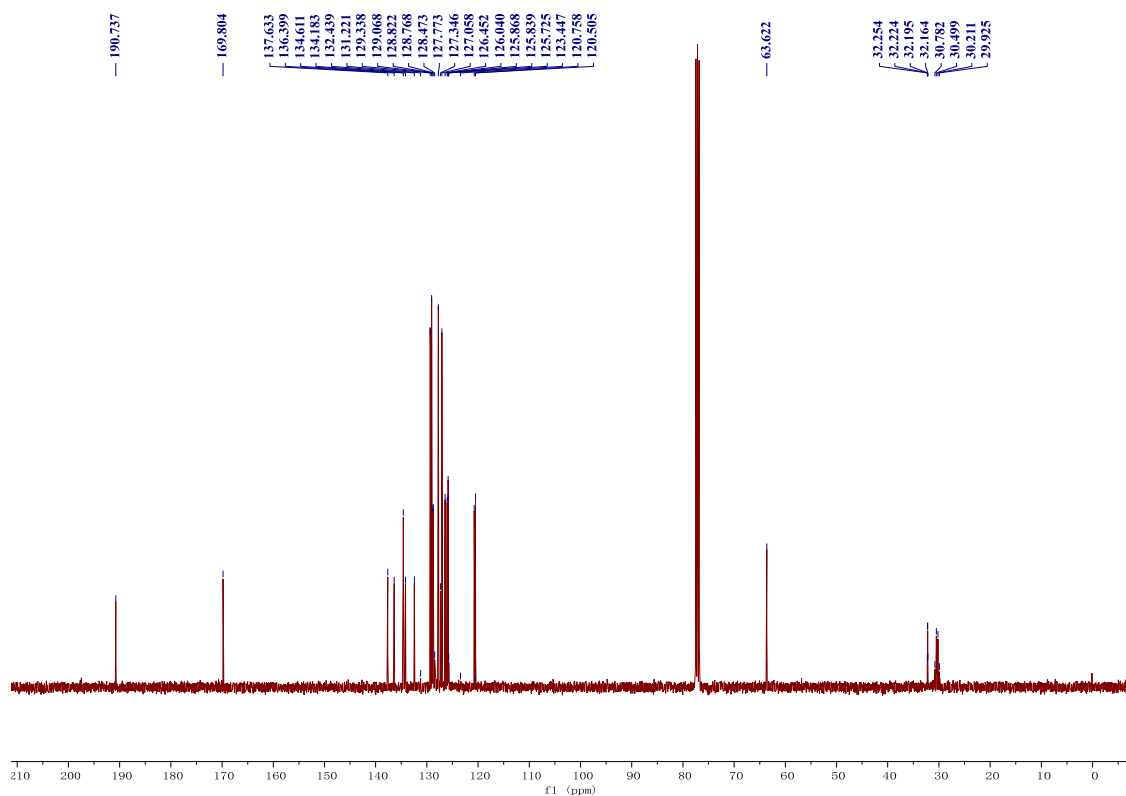

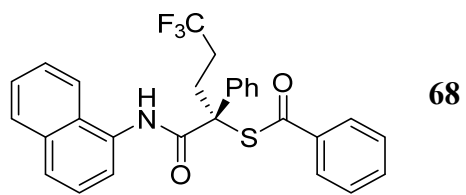

ty22-7-68, 19, fid

-66.232

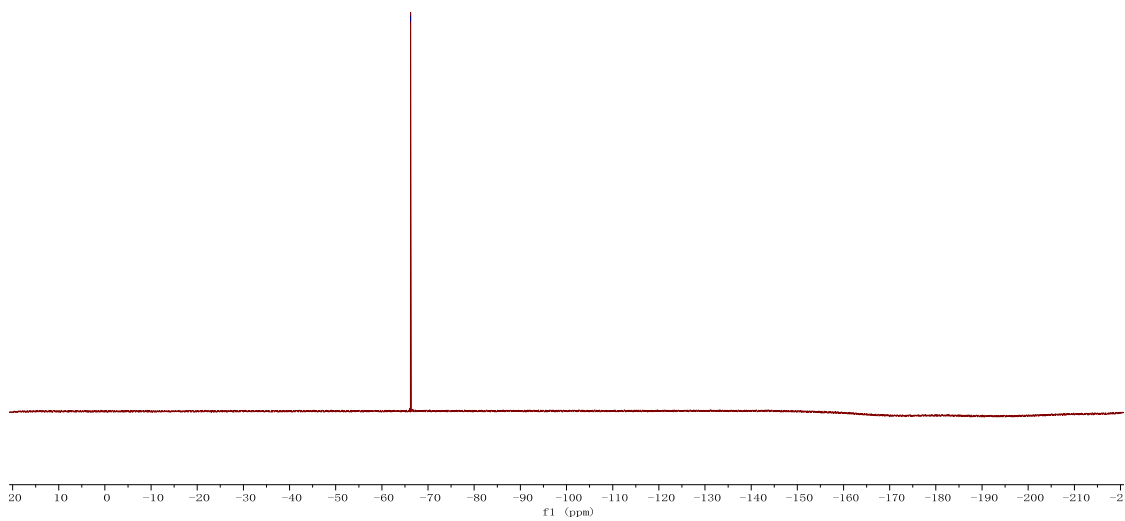

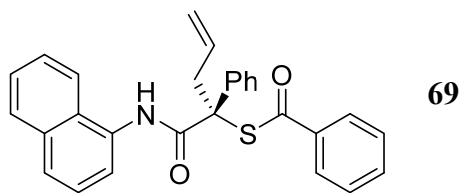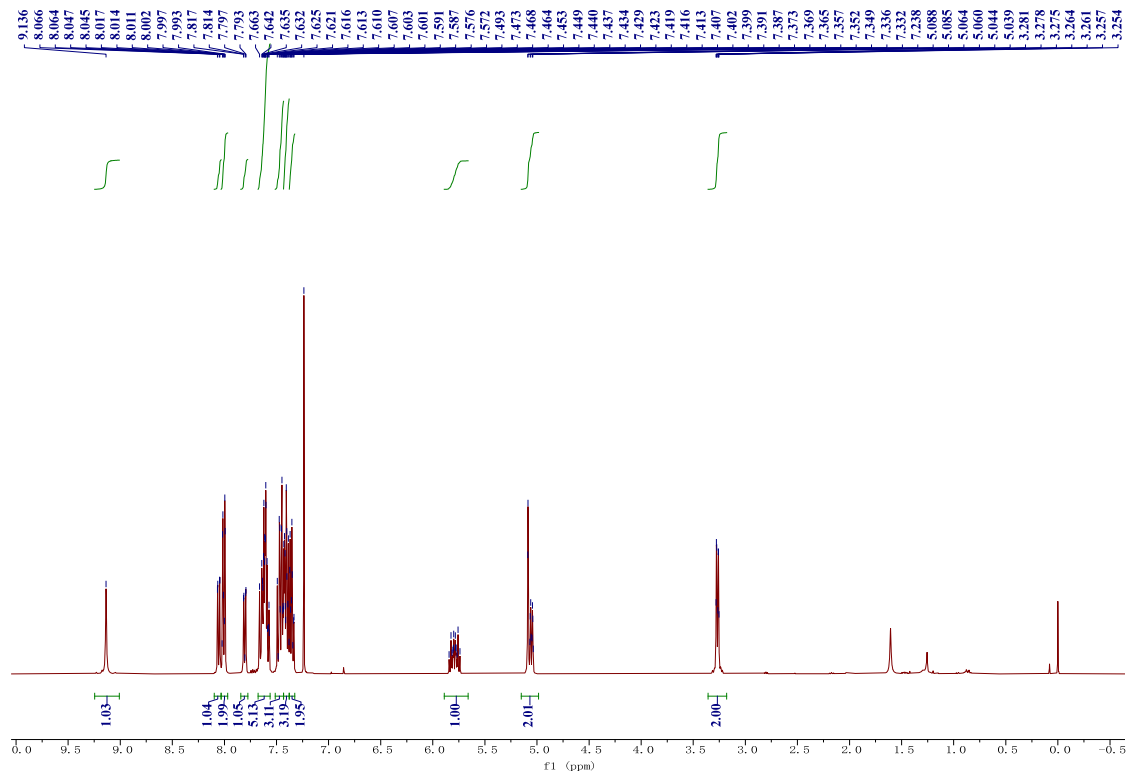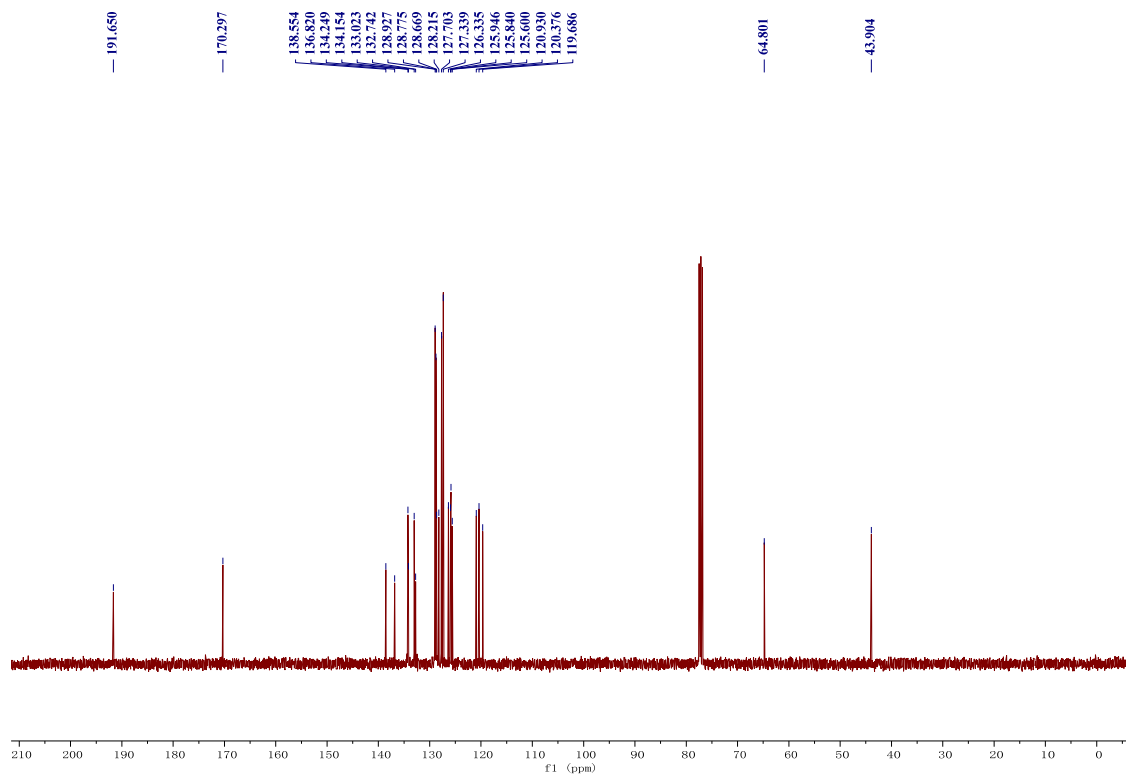

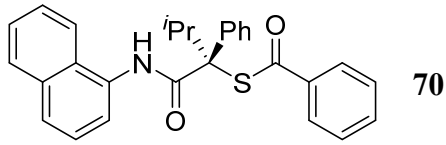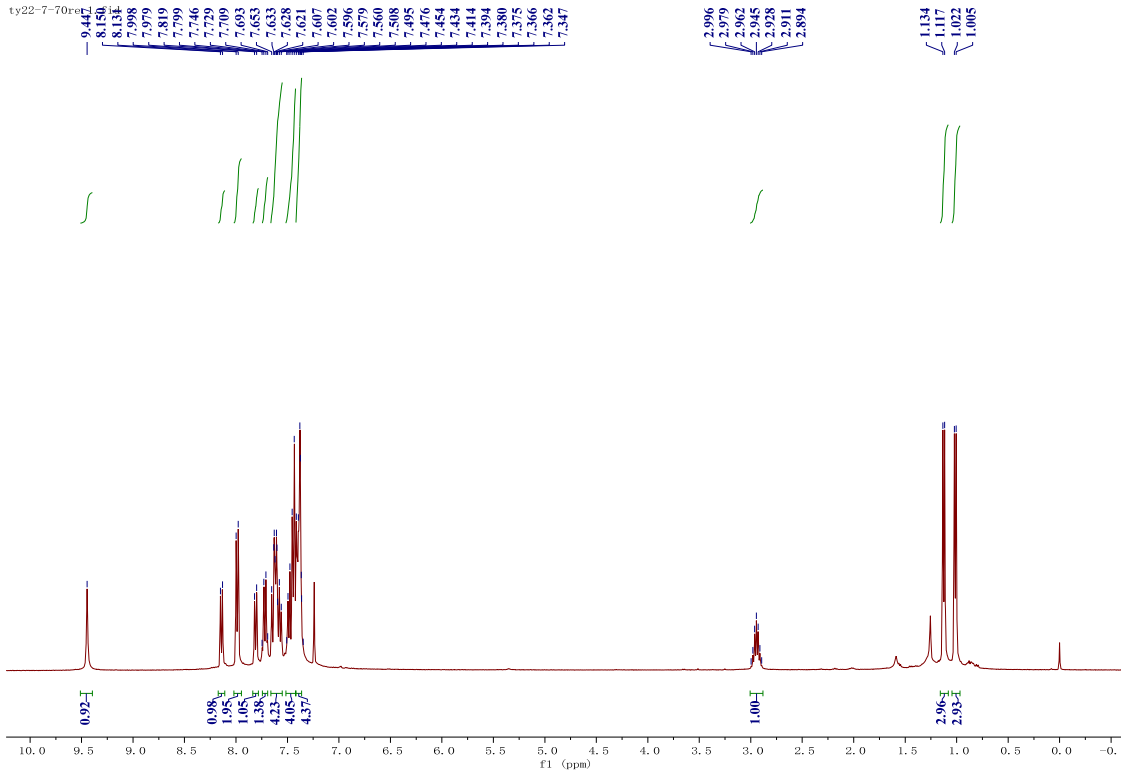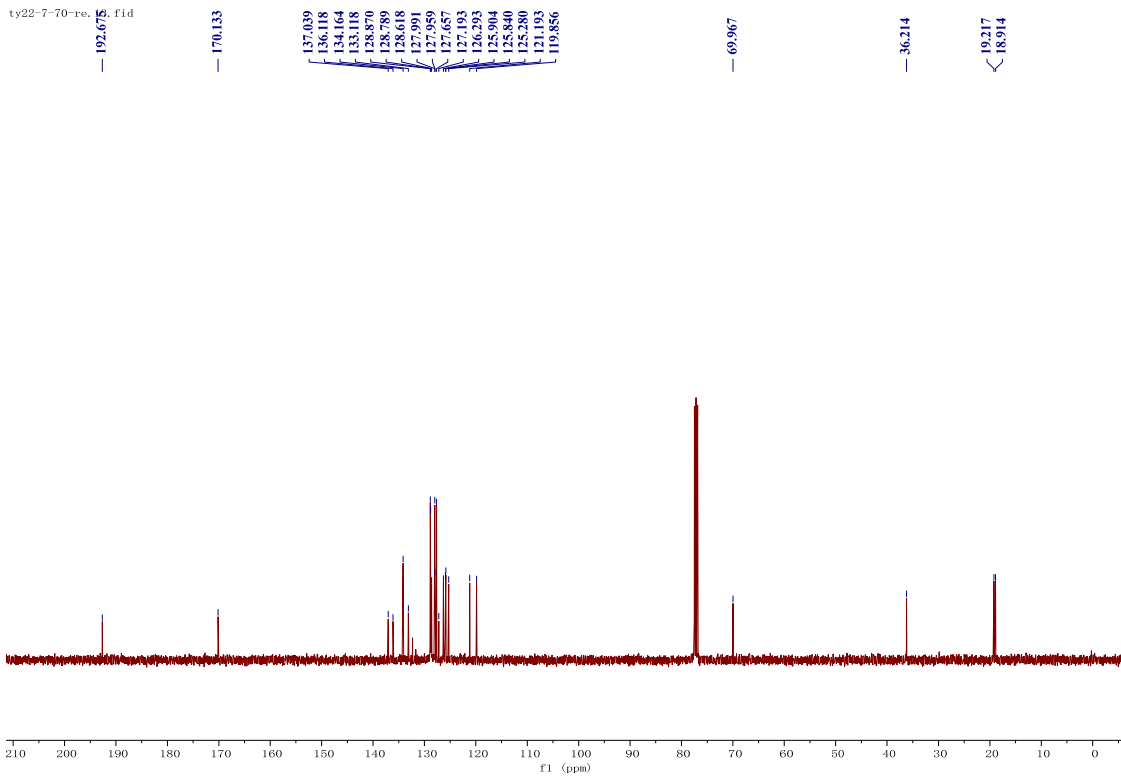

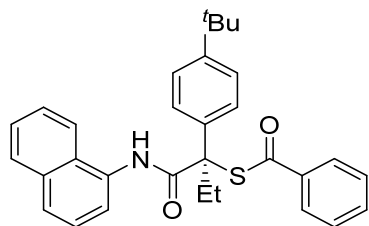

71

ty22-7-73. 1. fid

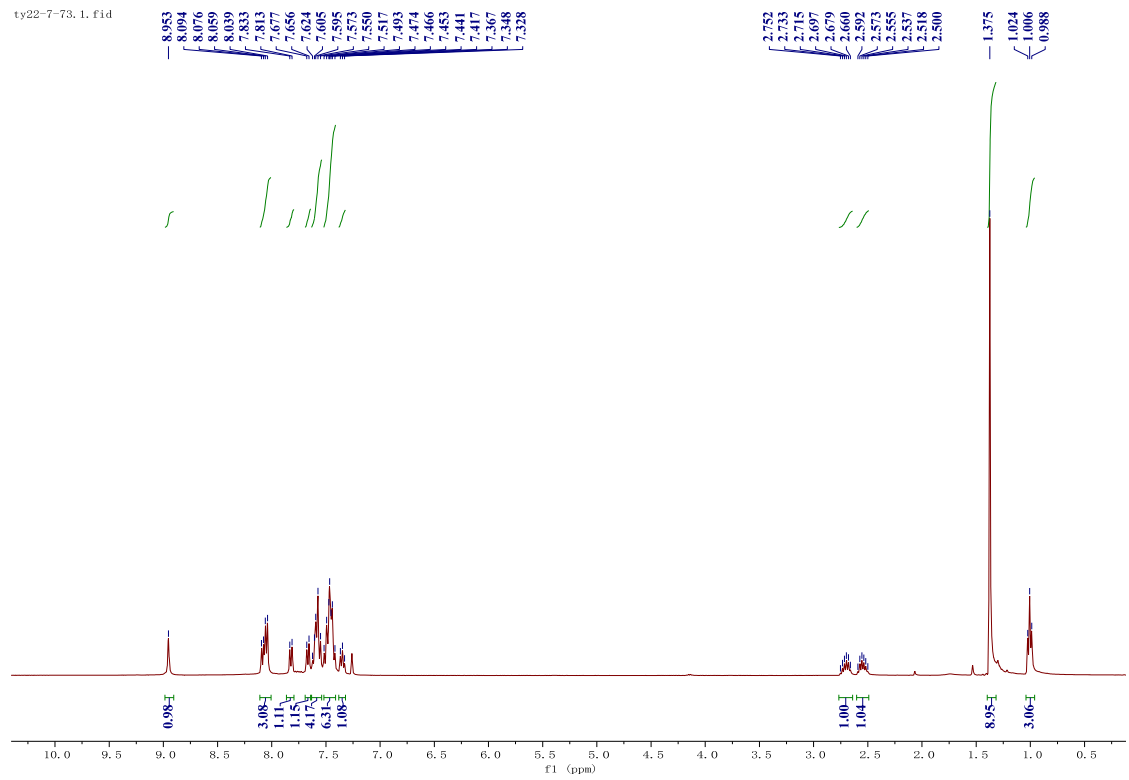

ty22-7-73. 13c. fid

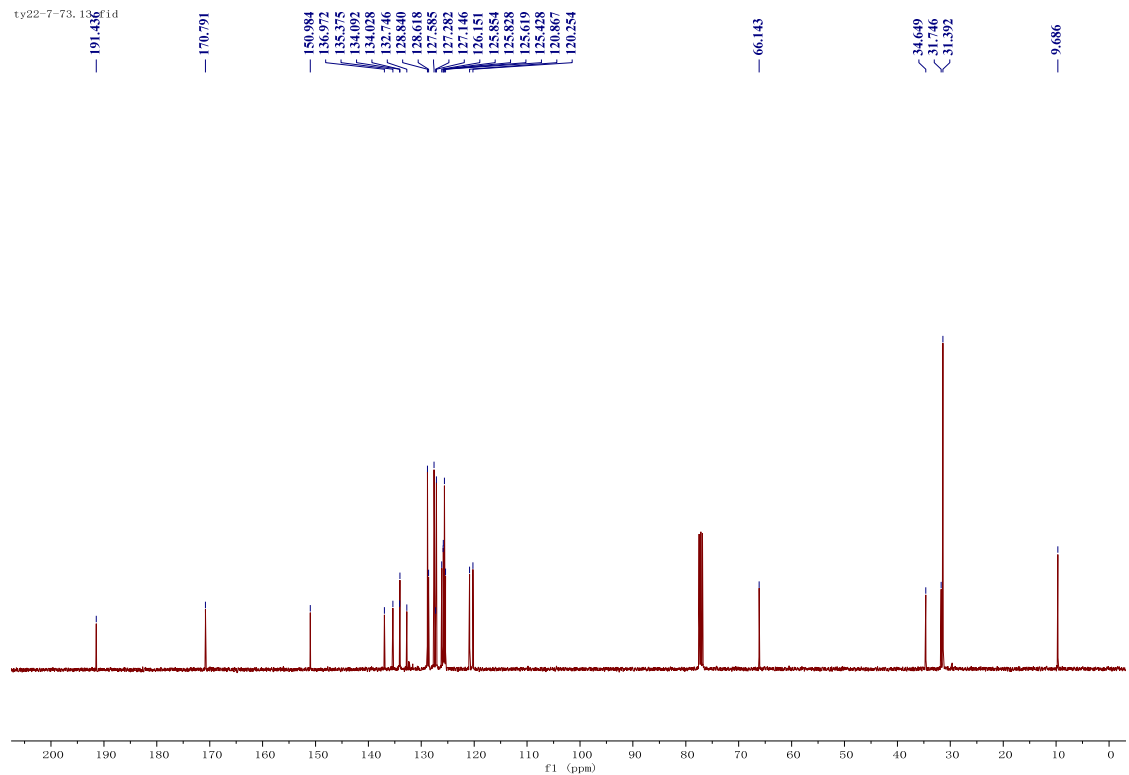

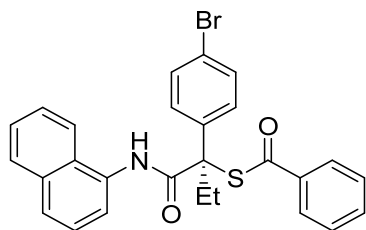

72

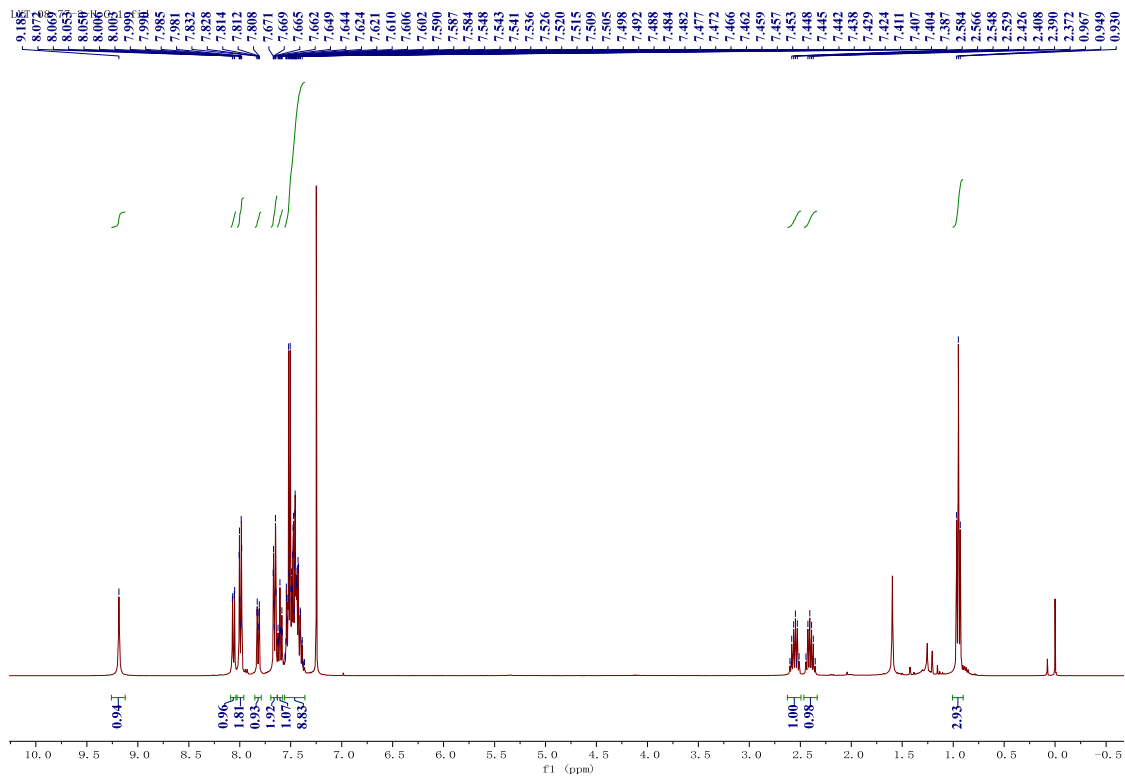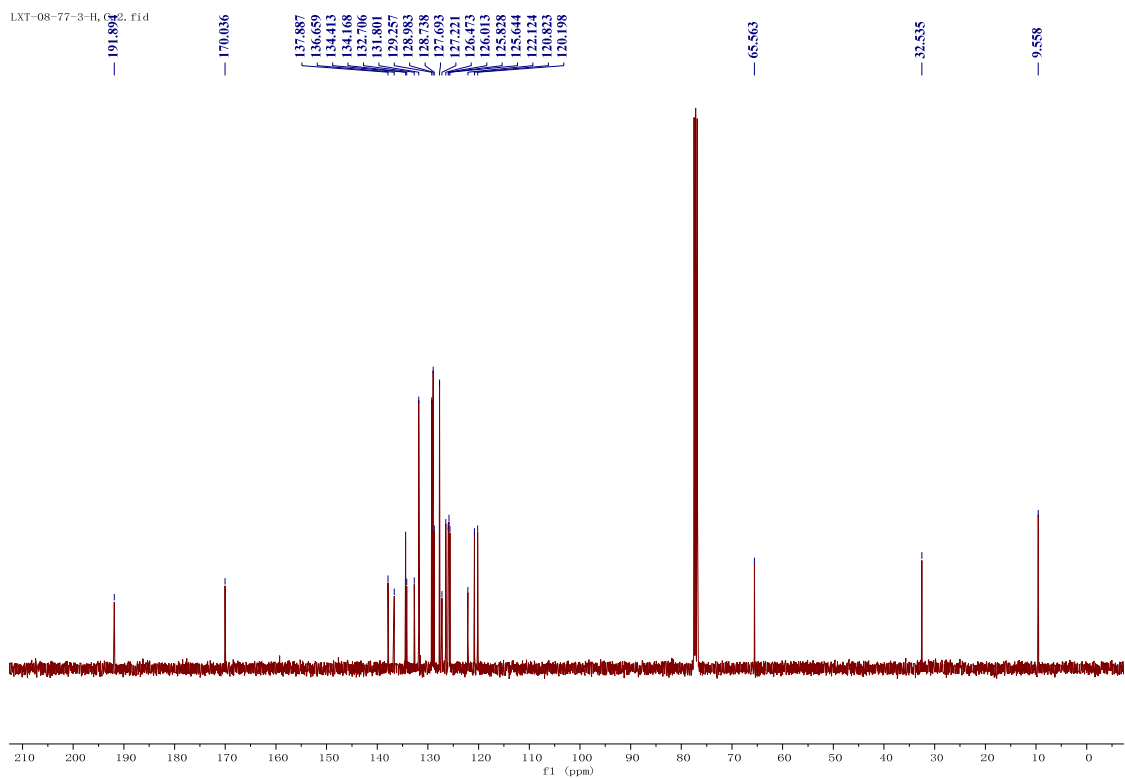

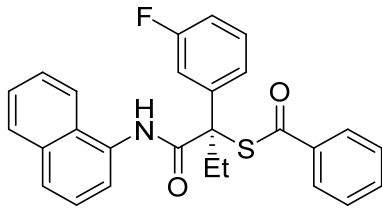

73

LXT-08-75-3-H, F, 1. f1

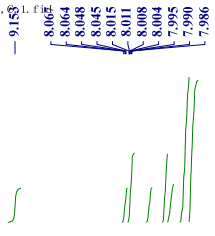

2.642  
2.624  
2.606  
2.588  
2.570  
2.551  
2.469  
2.451  
2.433  
2.415  
2.397  
2.378  
0.976  
0.957  
0.939

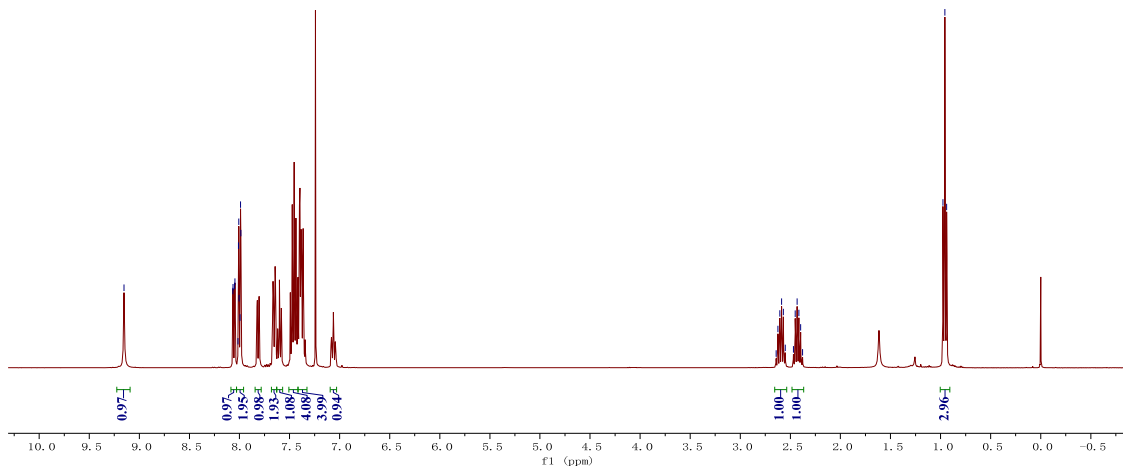

LXT-08-75-3-H, F, 2. fid

191.717  
169.936  
164.125  
161.673  
141.438  
141.438  
136.698  
134.389  
134.167  
132.693  
130.231  
130.148  
128.974  
128.718  
127.687  
127.285  
126.420  
125.990  
125.829  
125.660  
123.252  
123.223  
120.829  
120.298  
115.210  
115.001  
114.911  
114.677  
65.566  
65.548  
32.463  
9.594

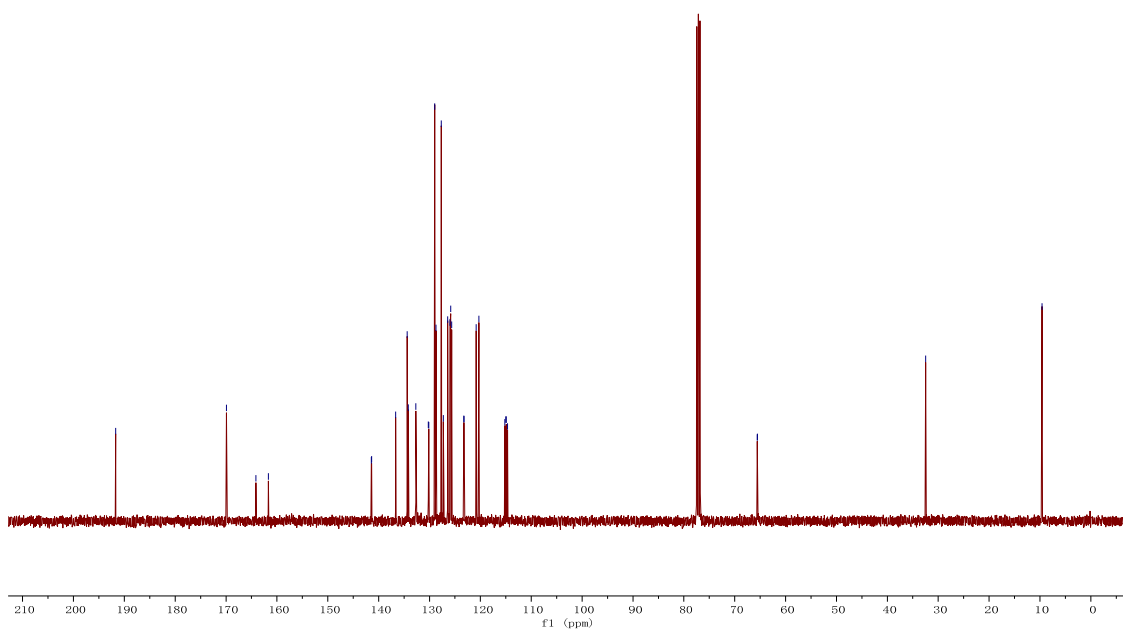



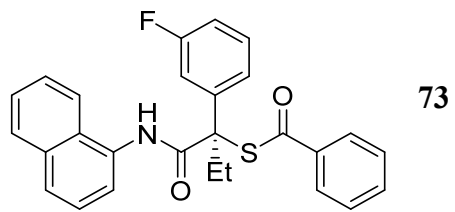

ty22-7-77.10.fid

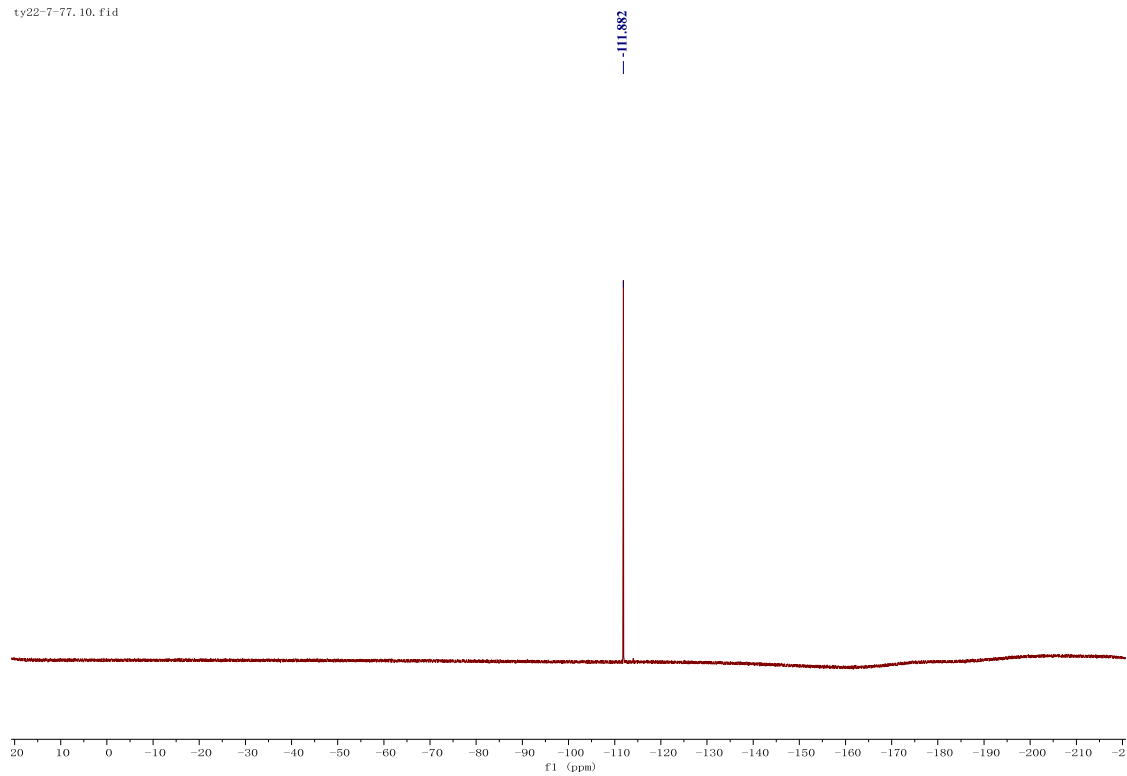

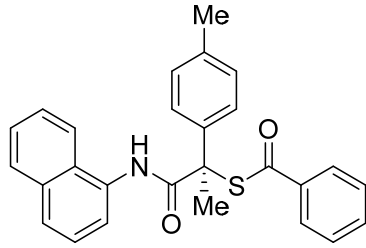

74

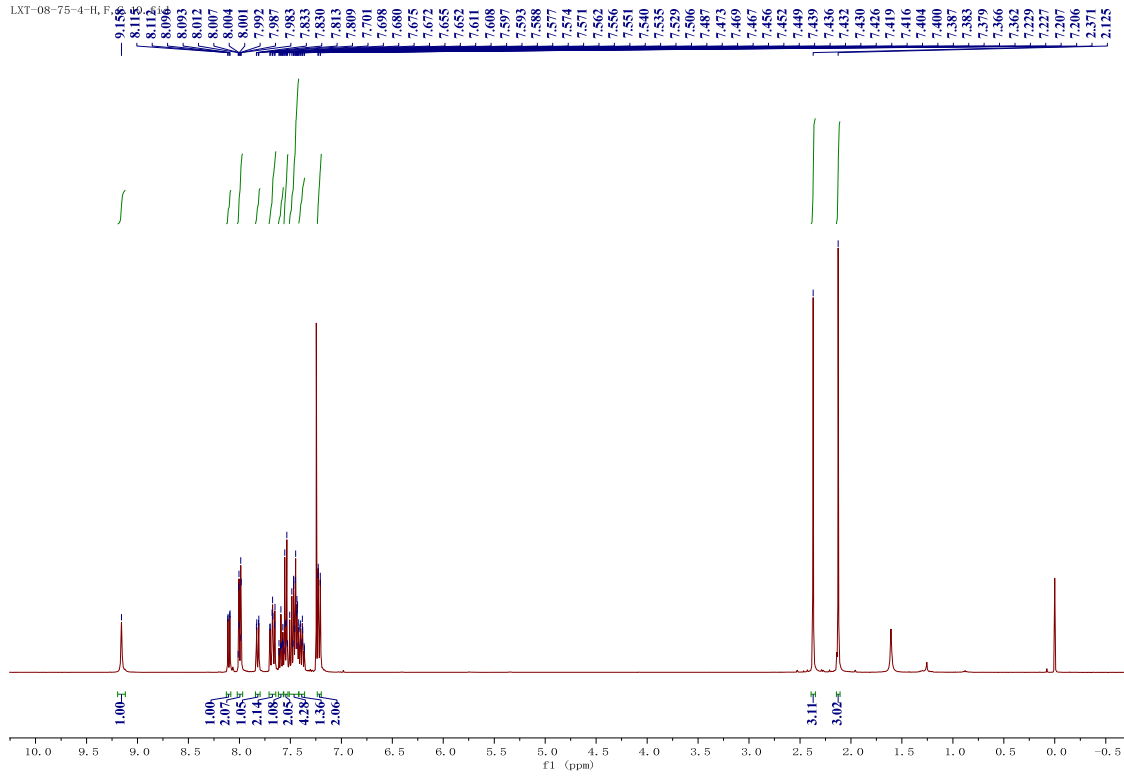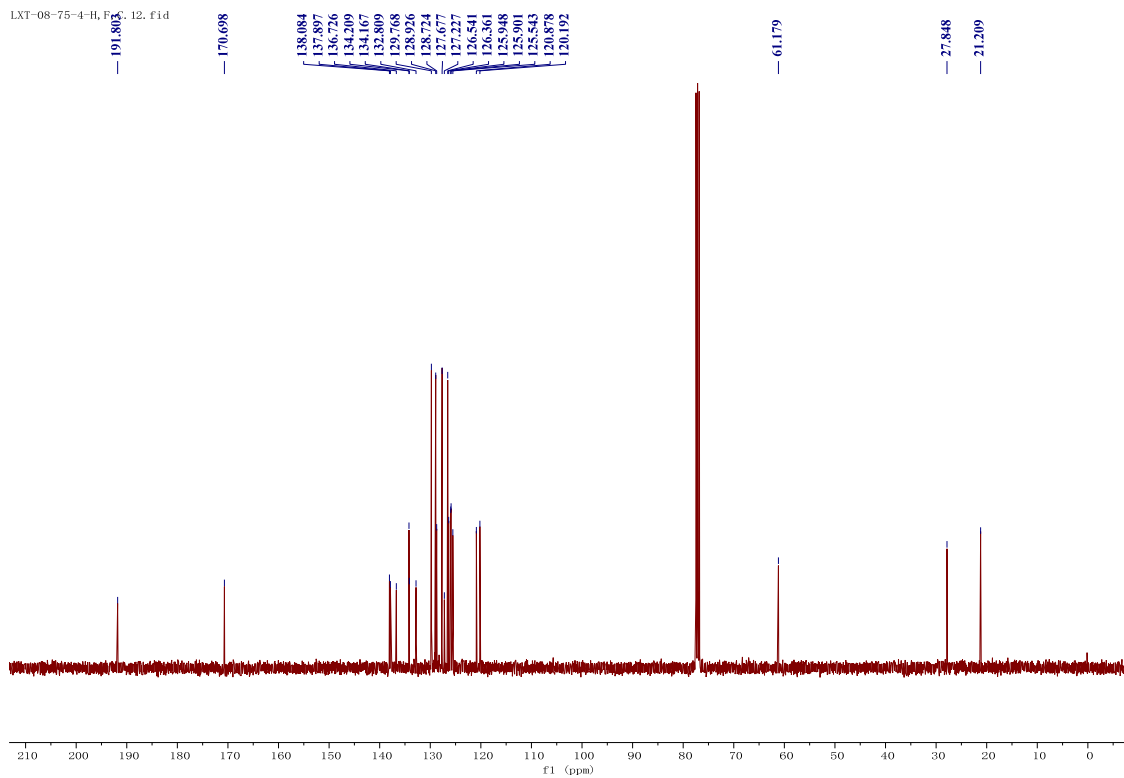

S337

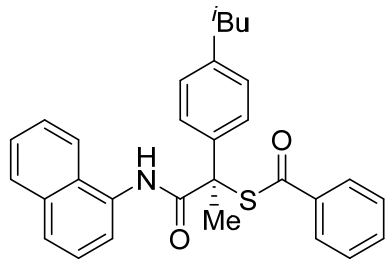

75

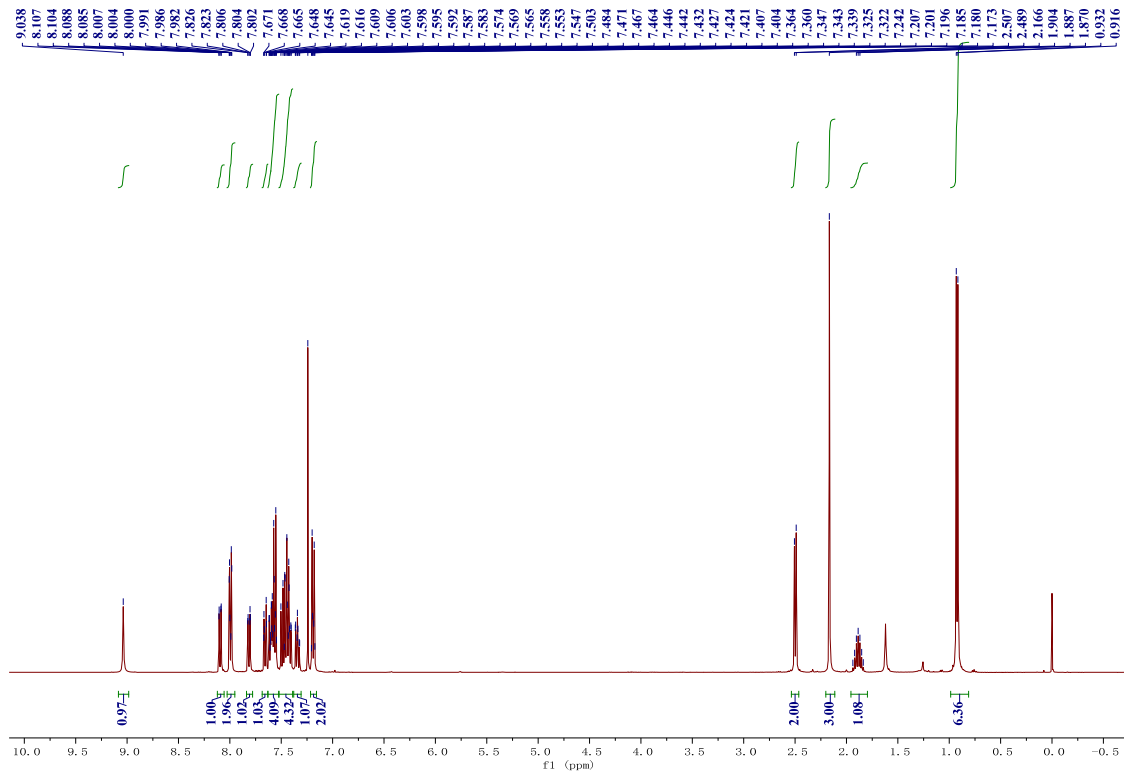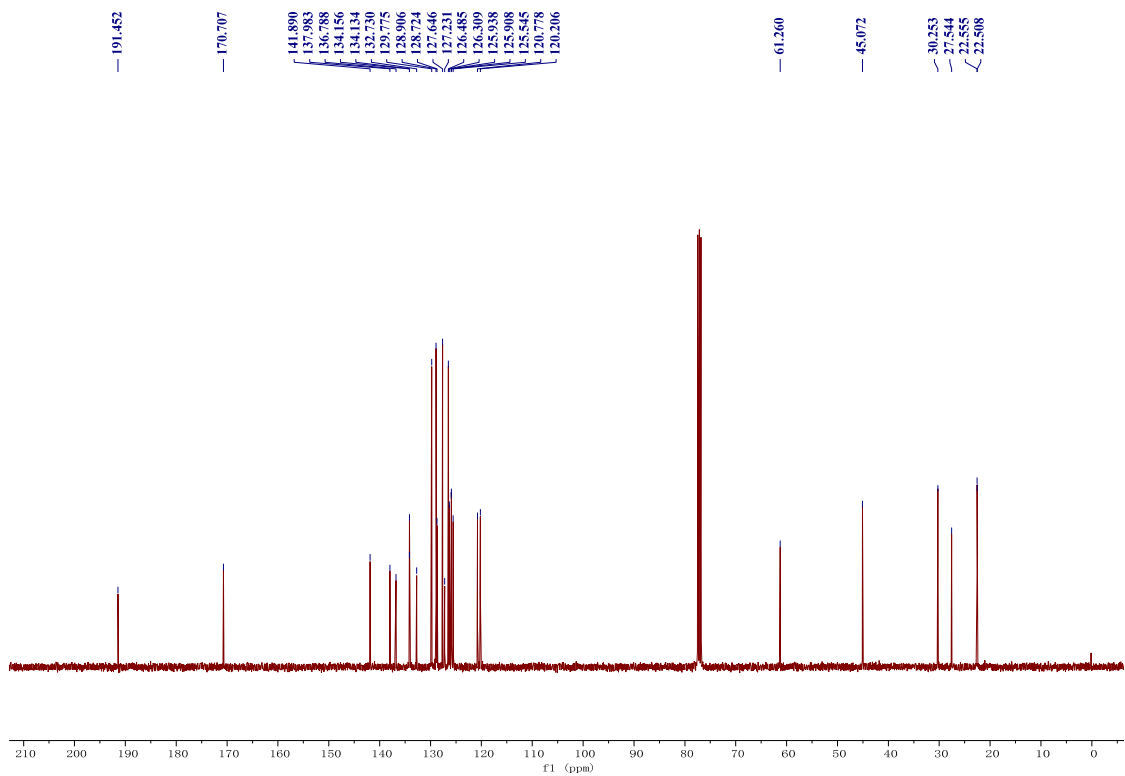

S338

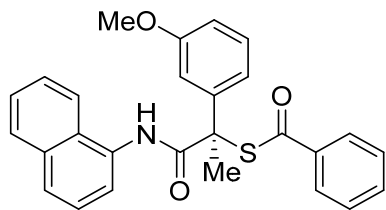

76

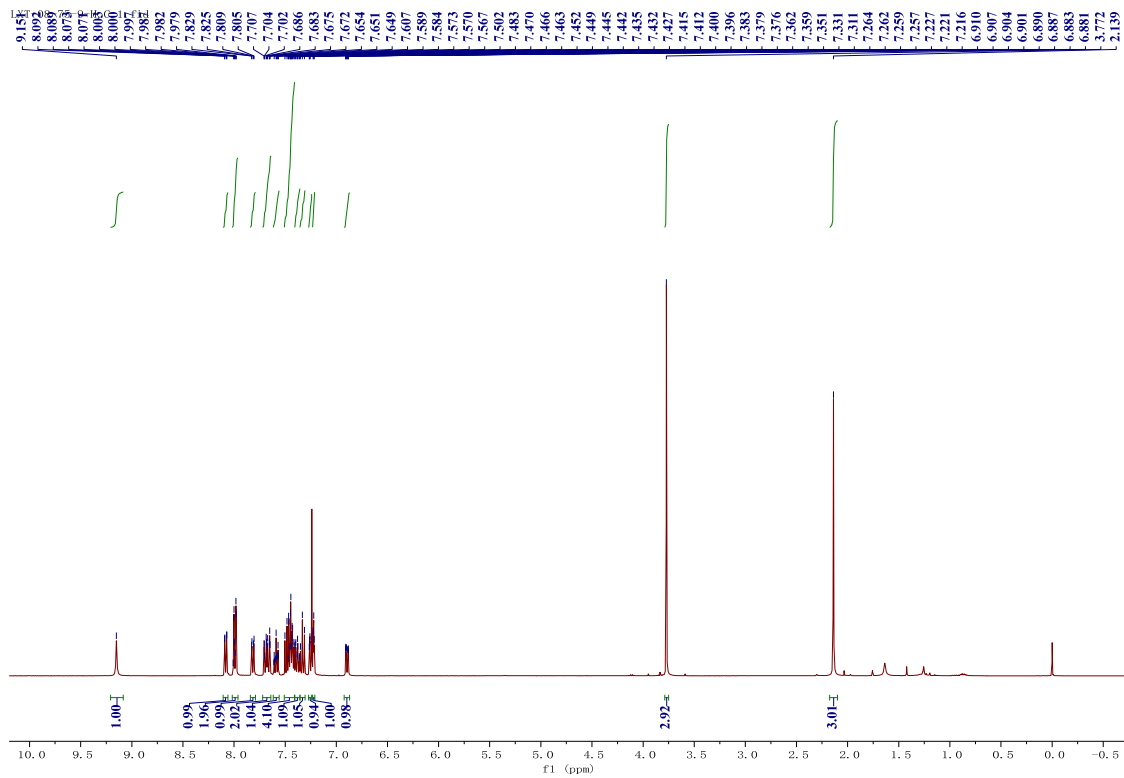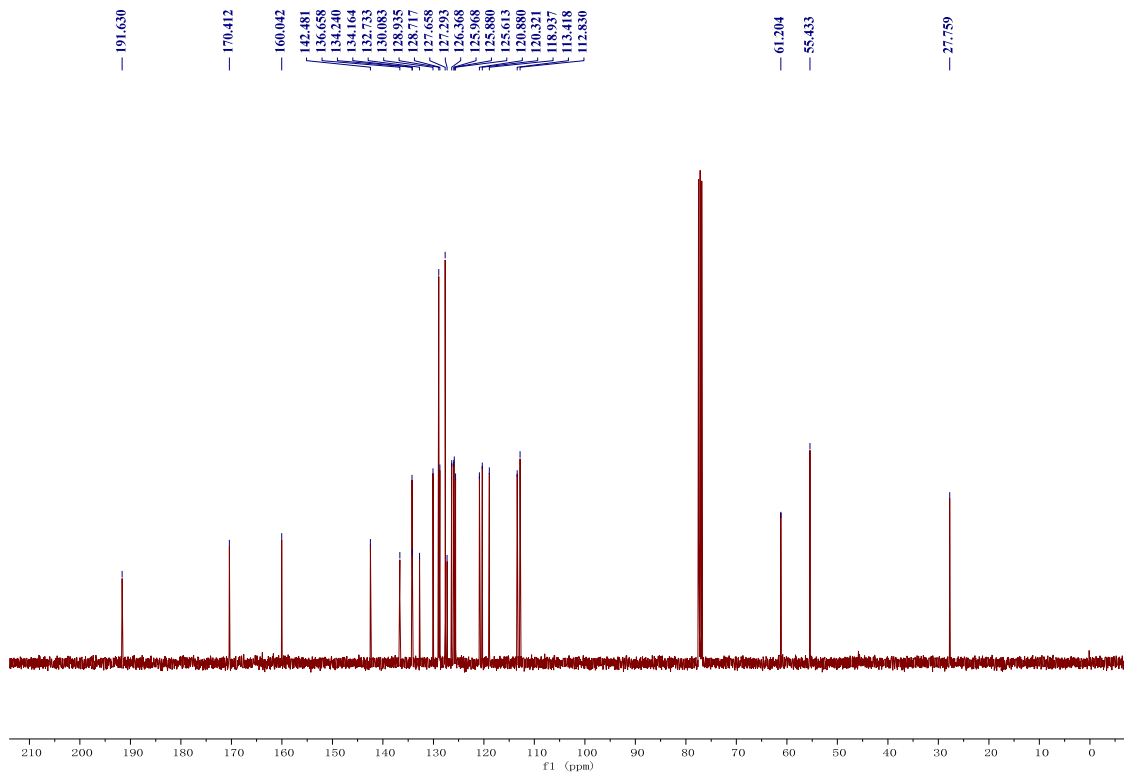

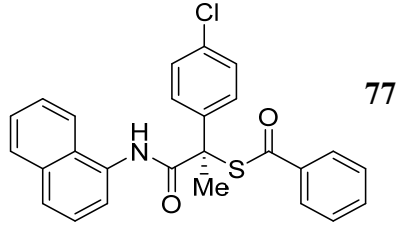

77

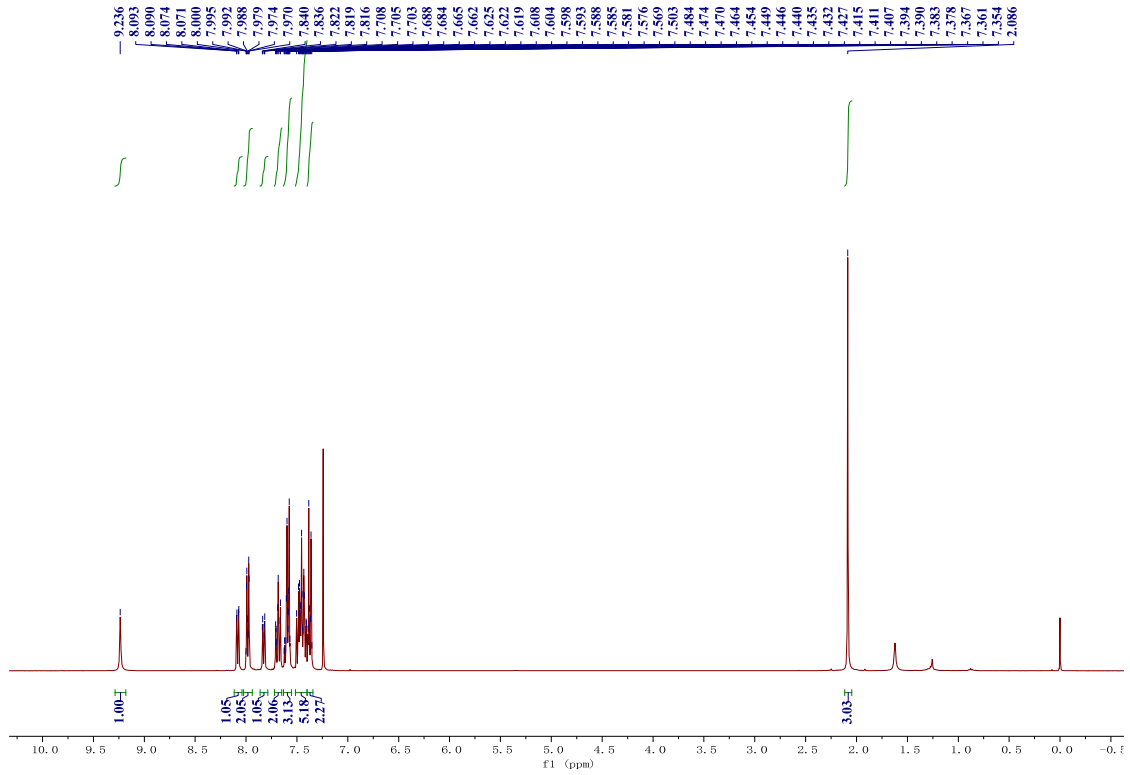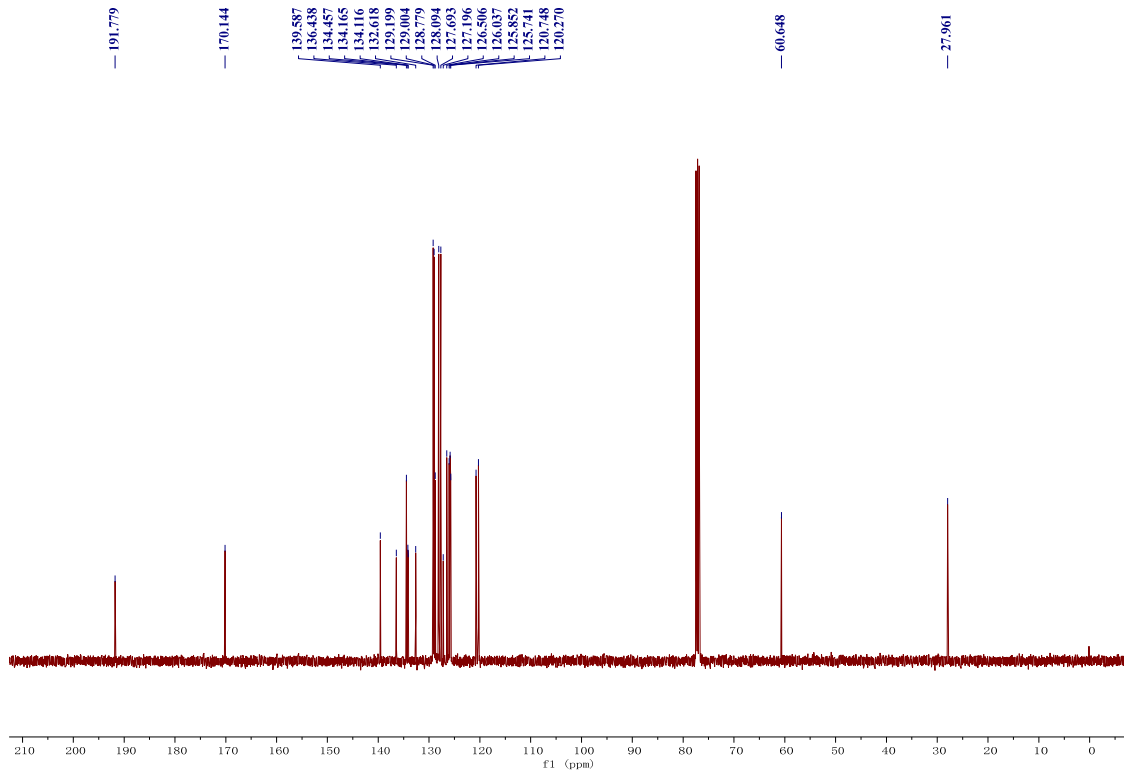

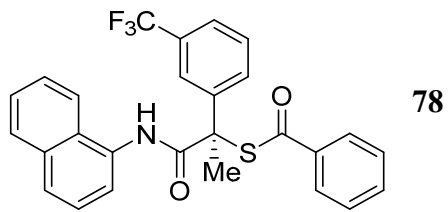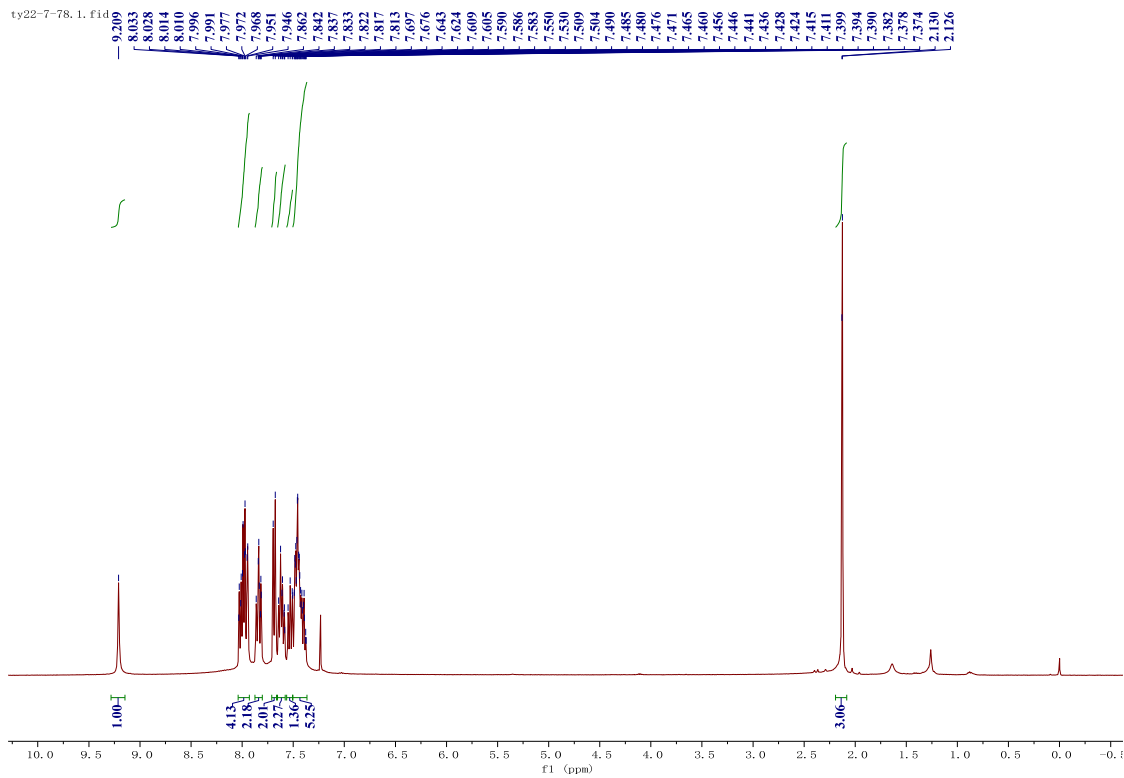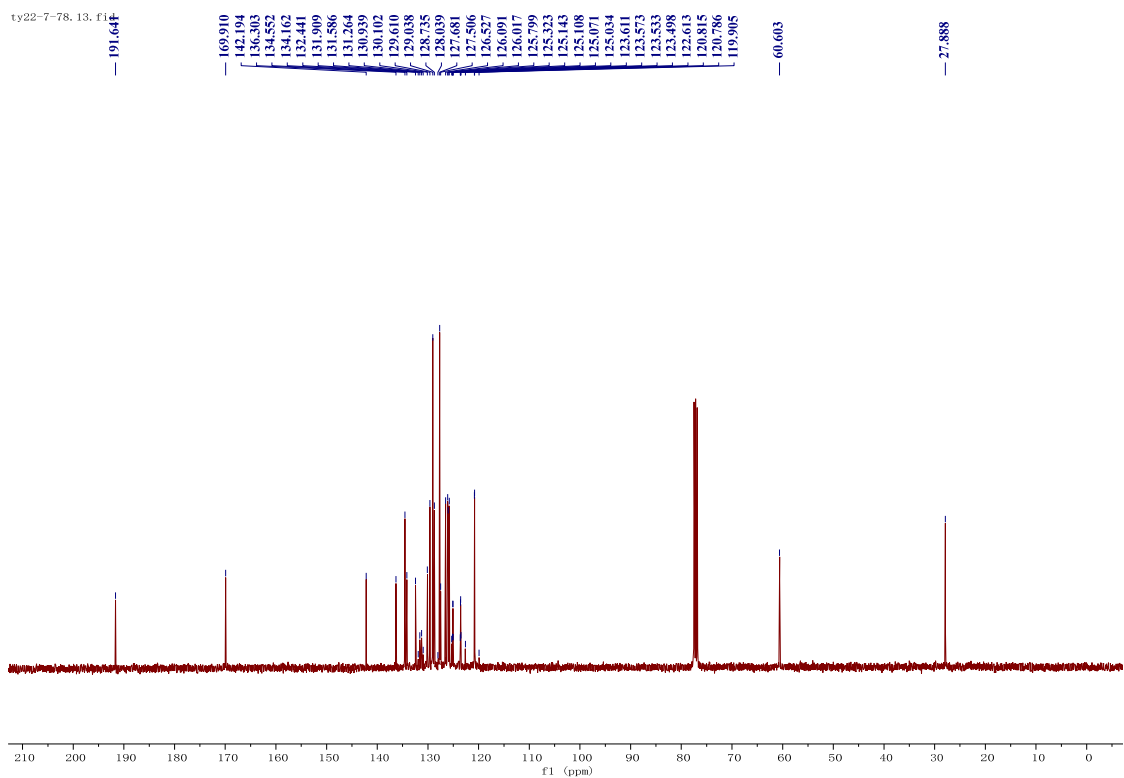

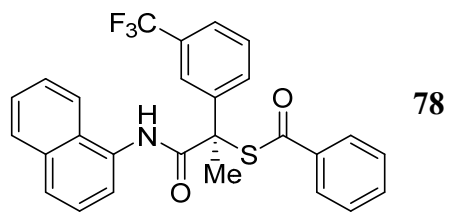

-62.518

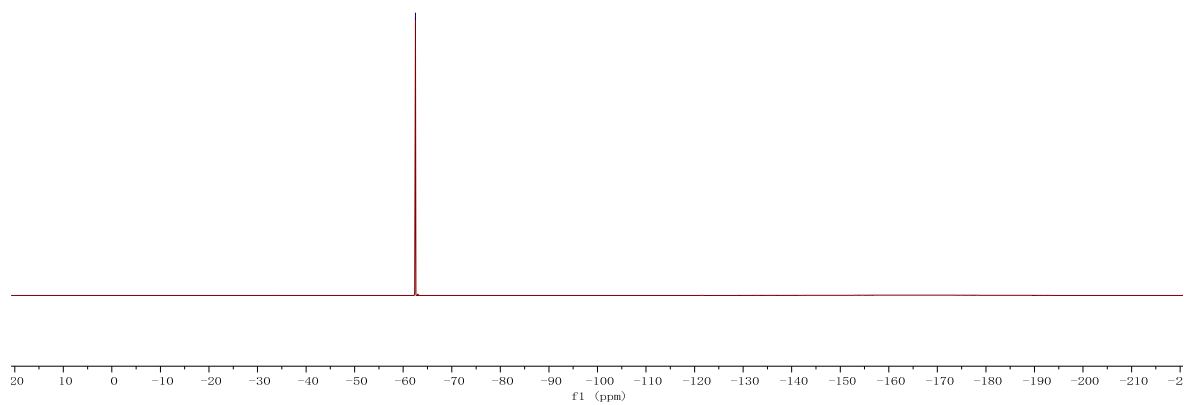

79

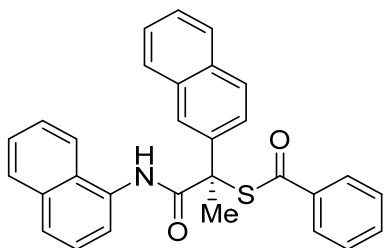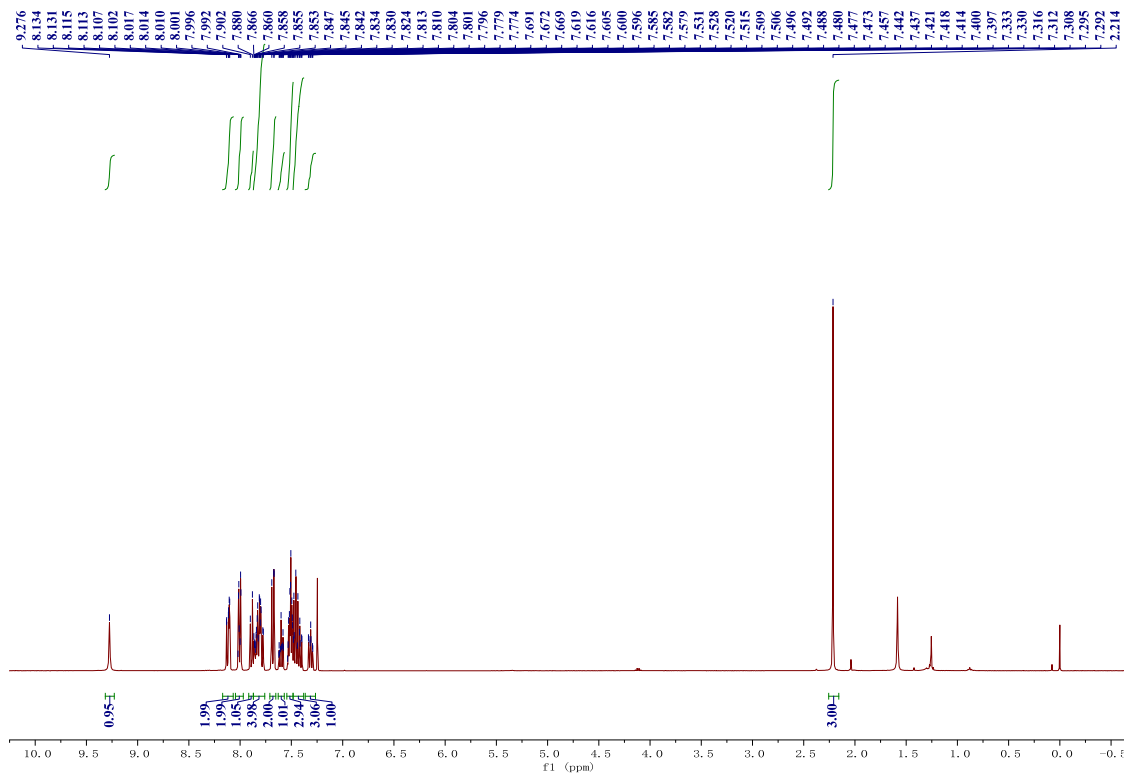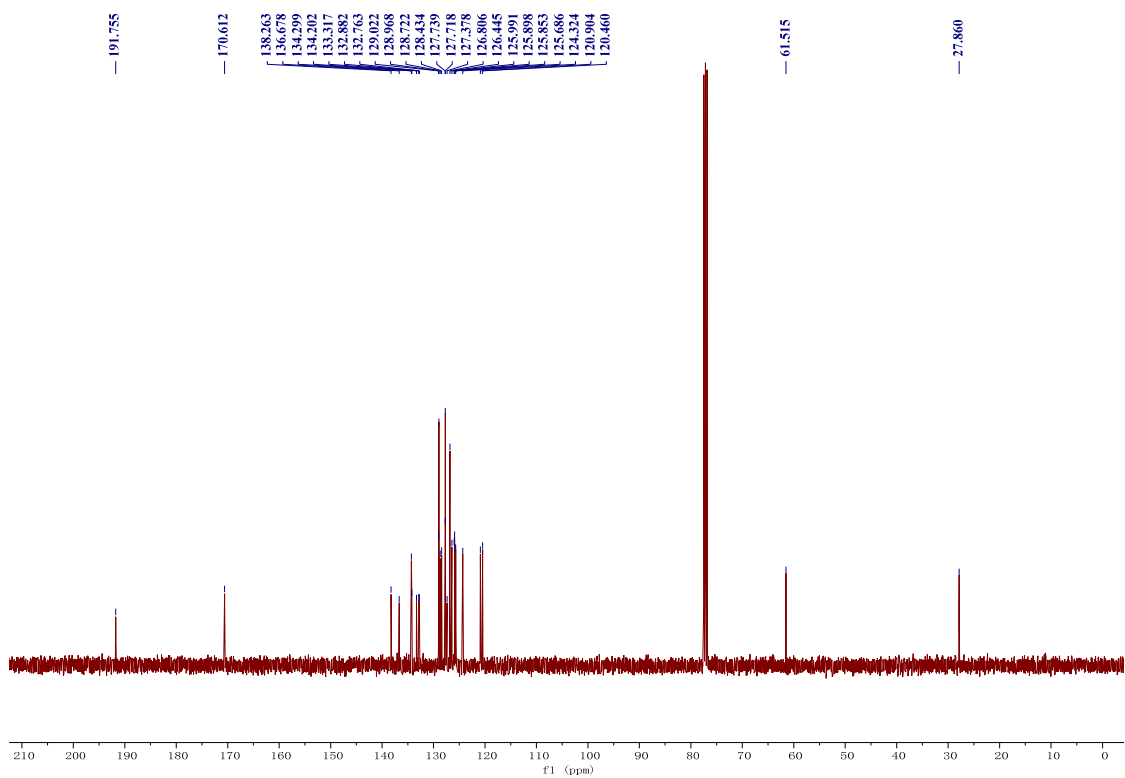

S343



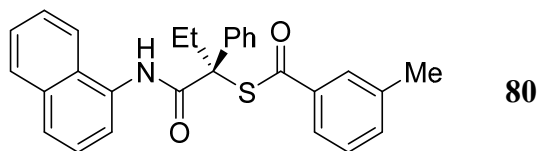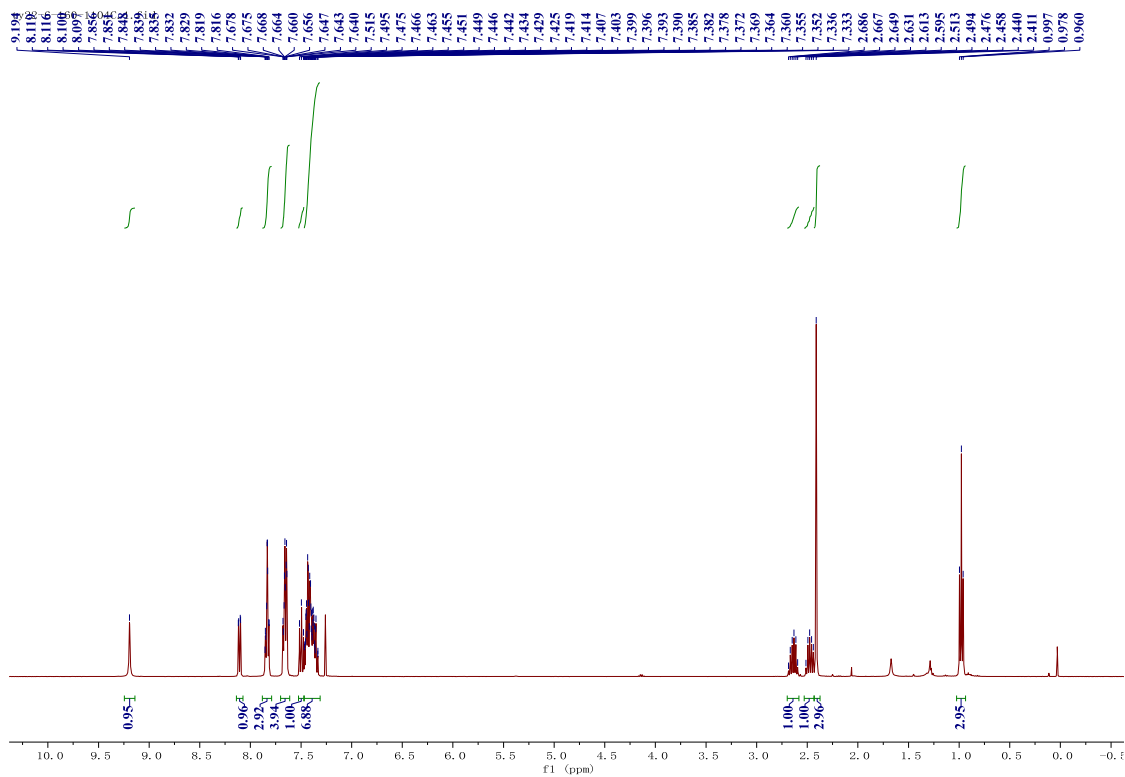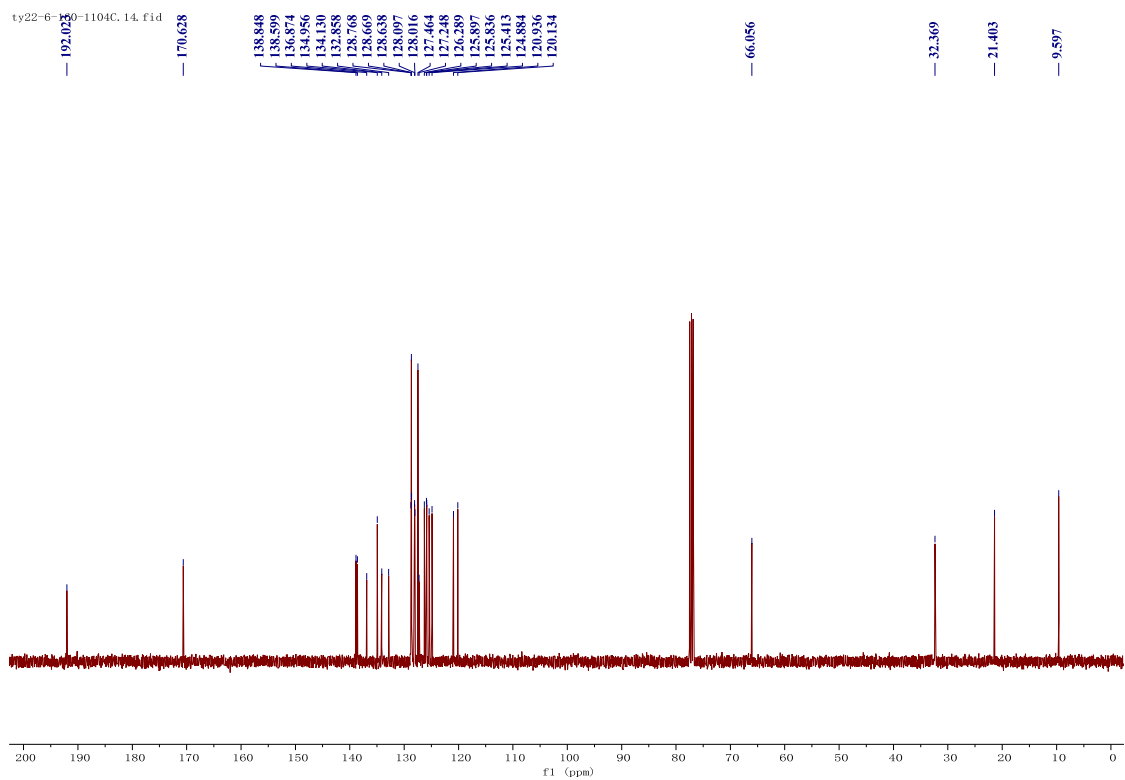

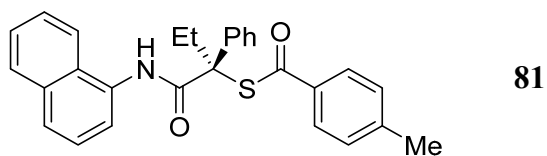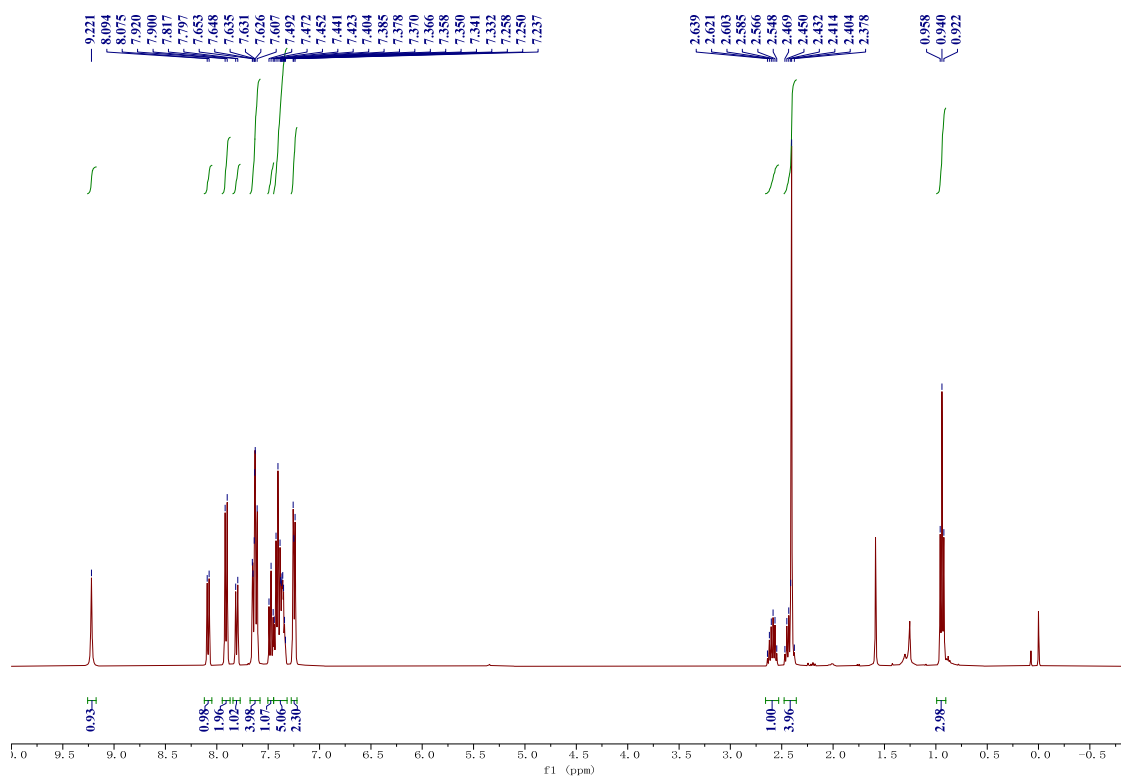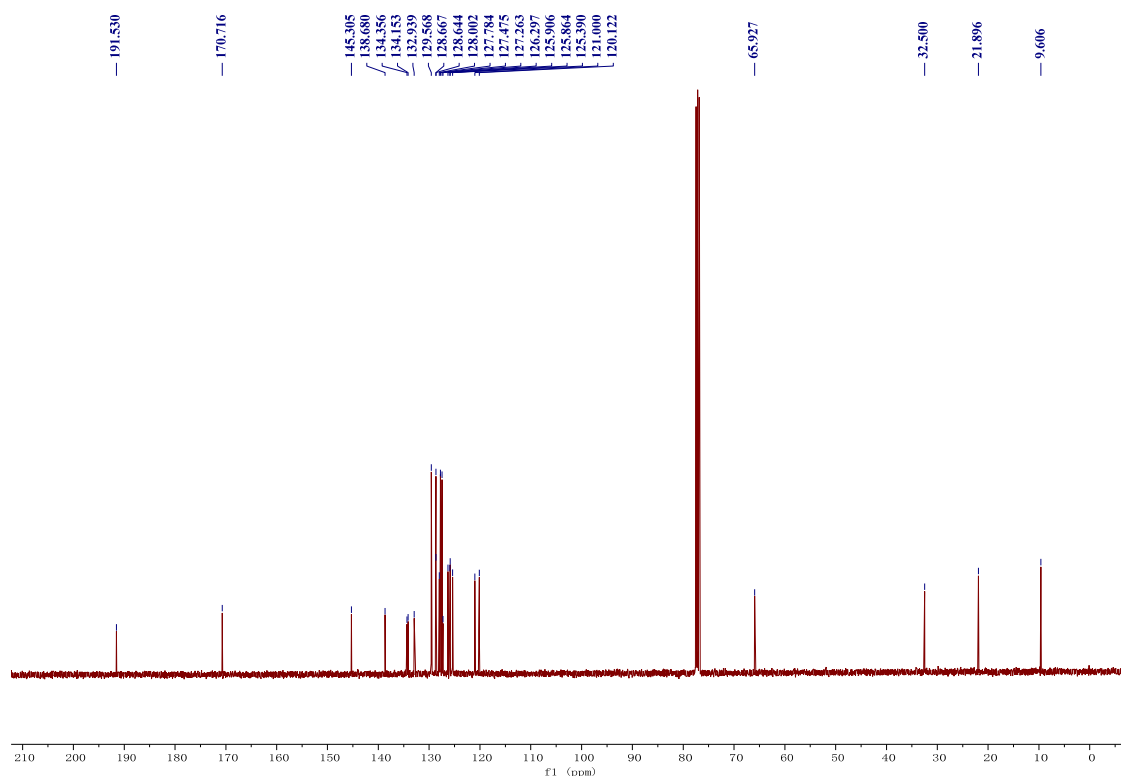

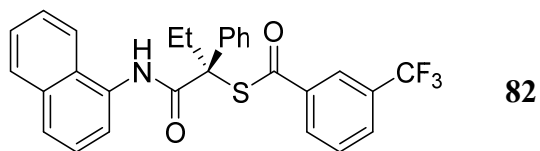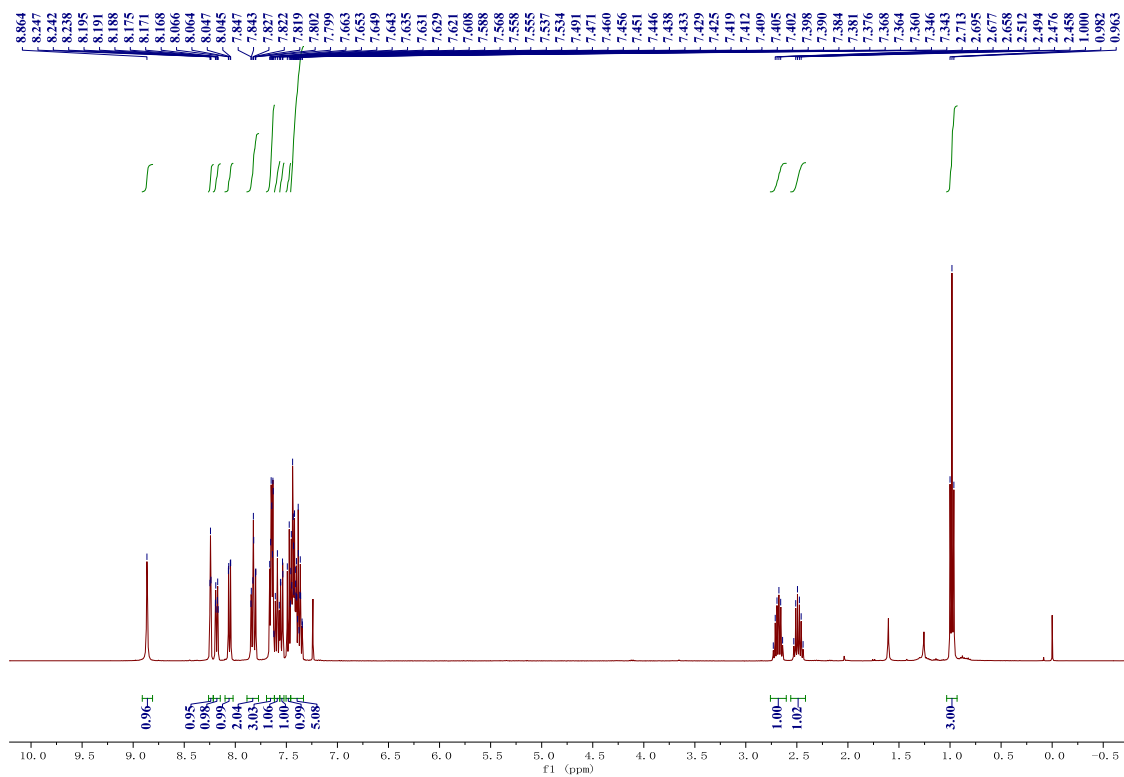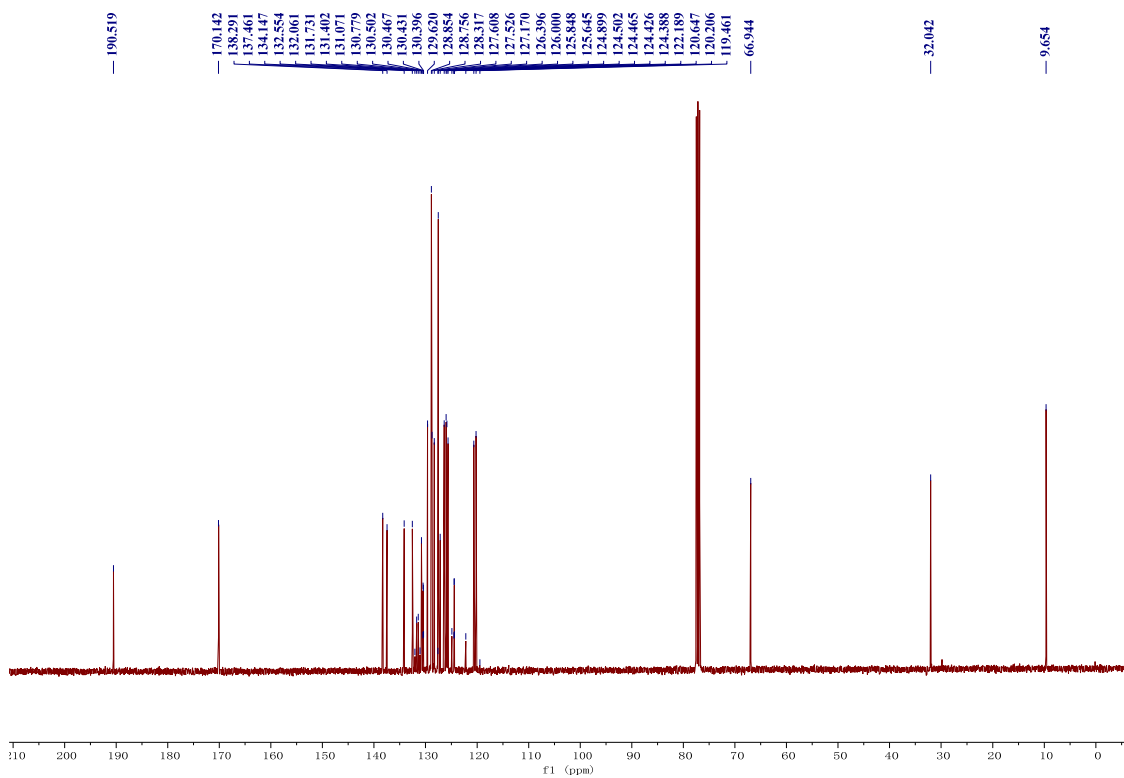

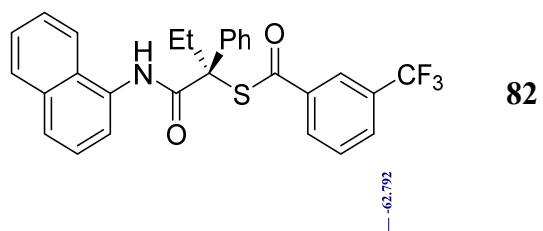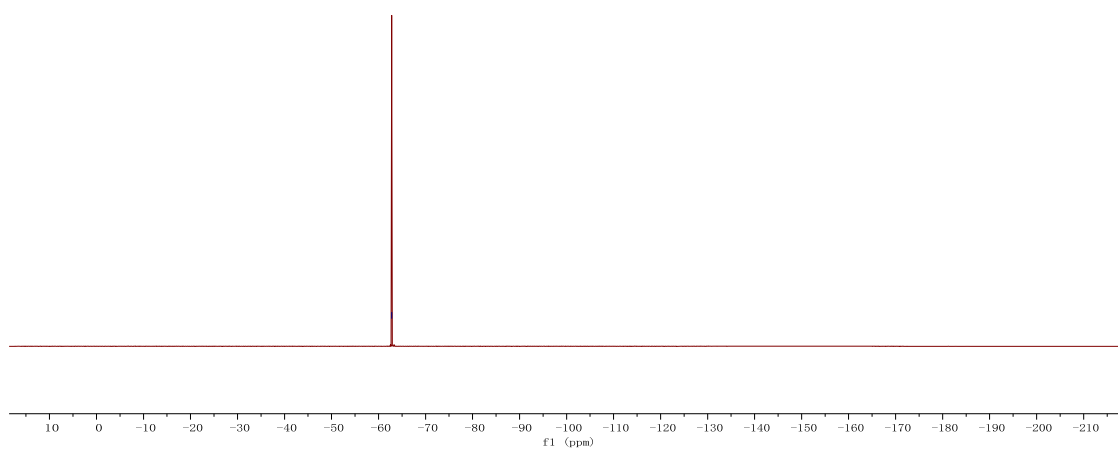

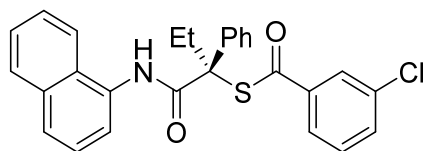

83

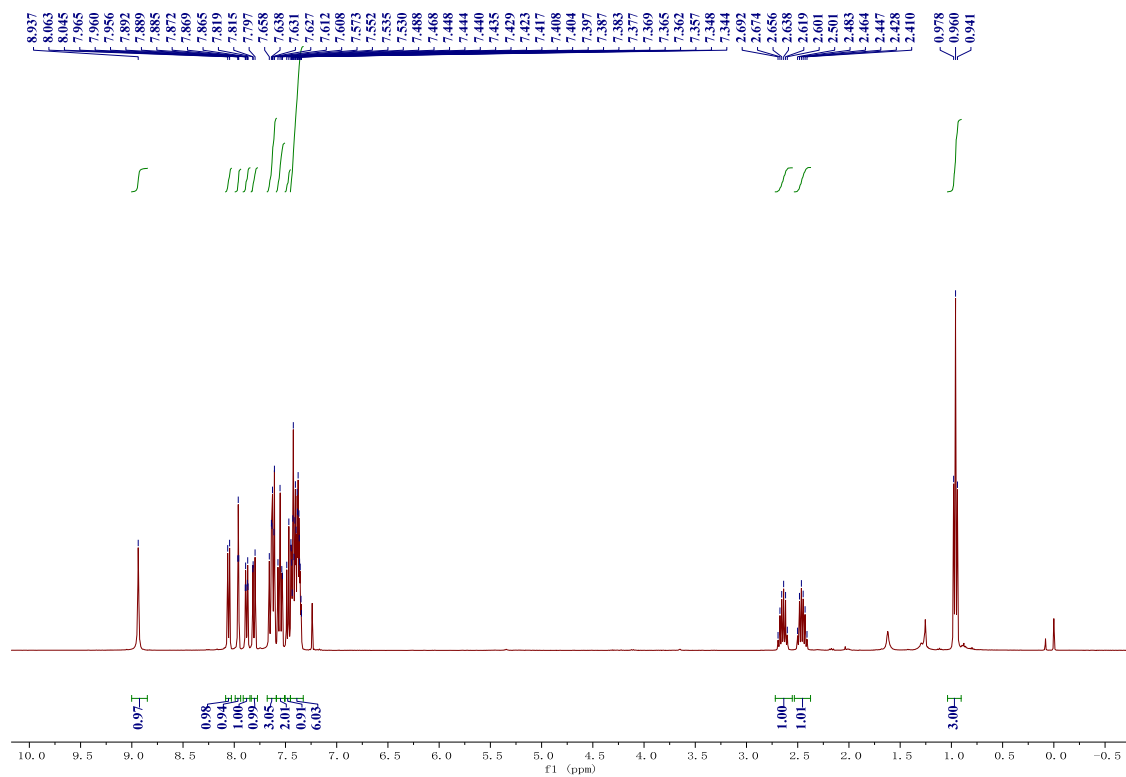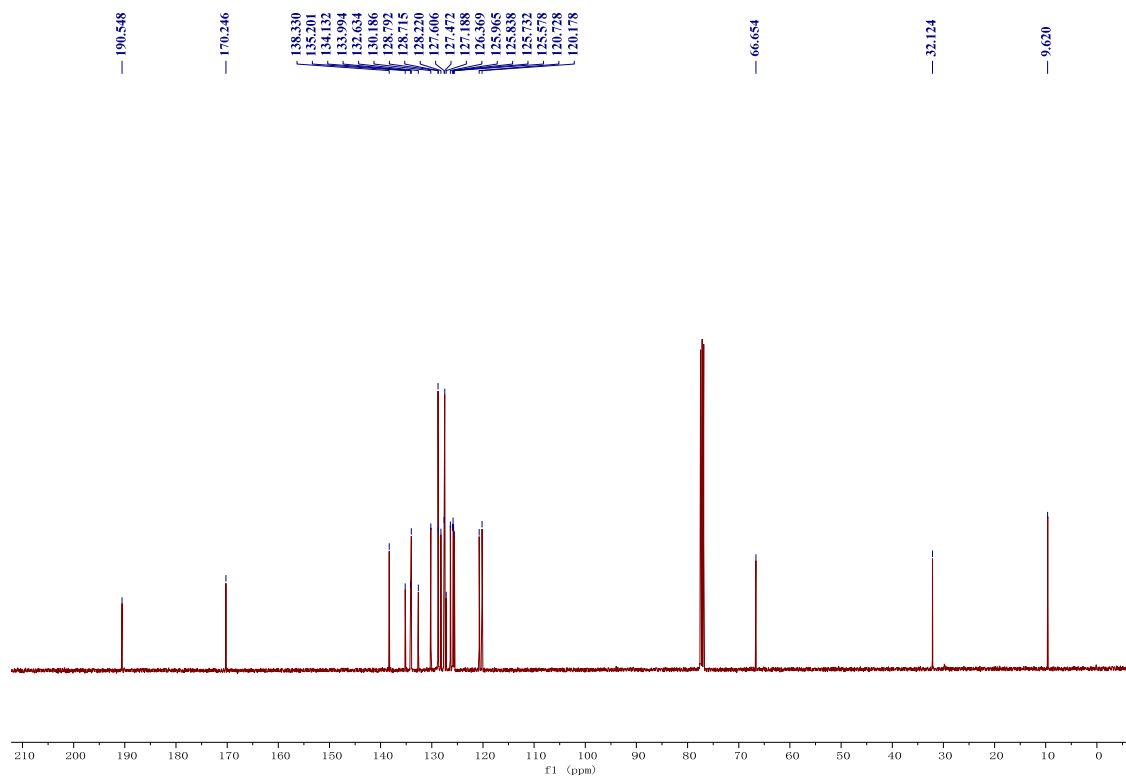

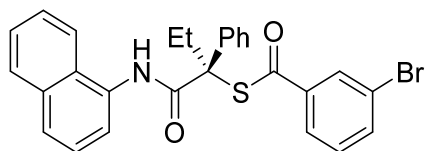

84

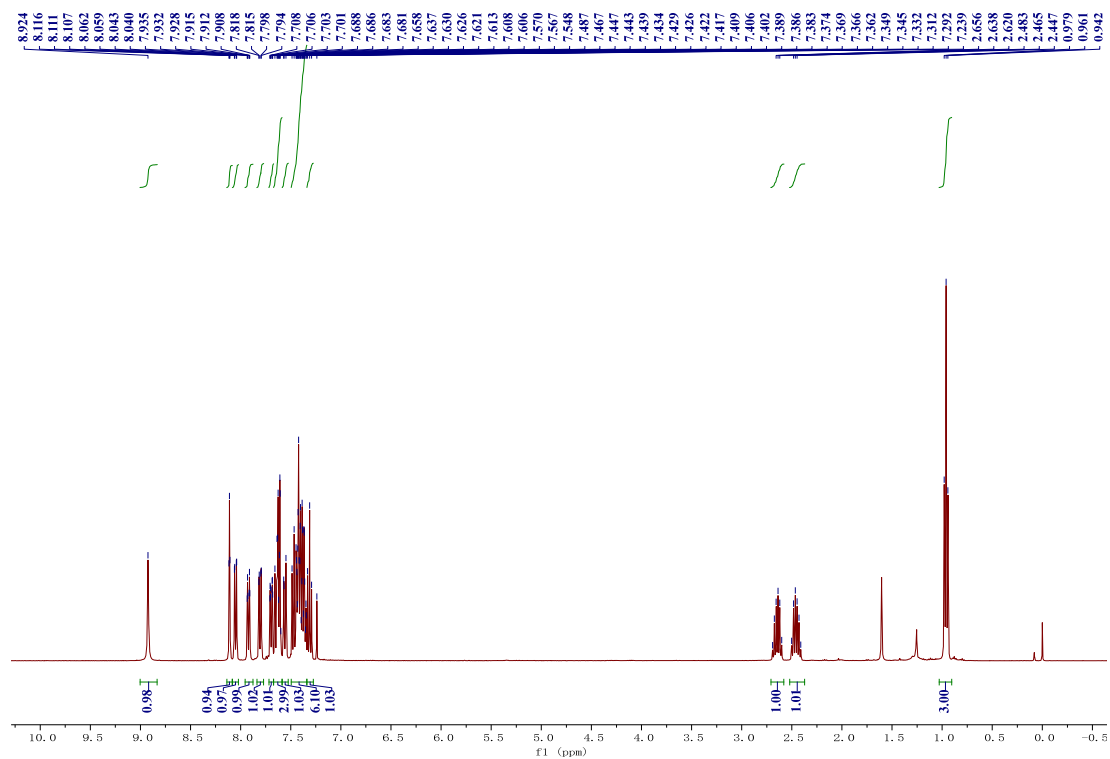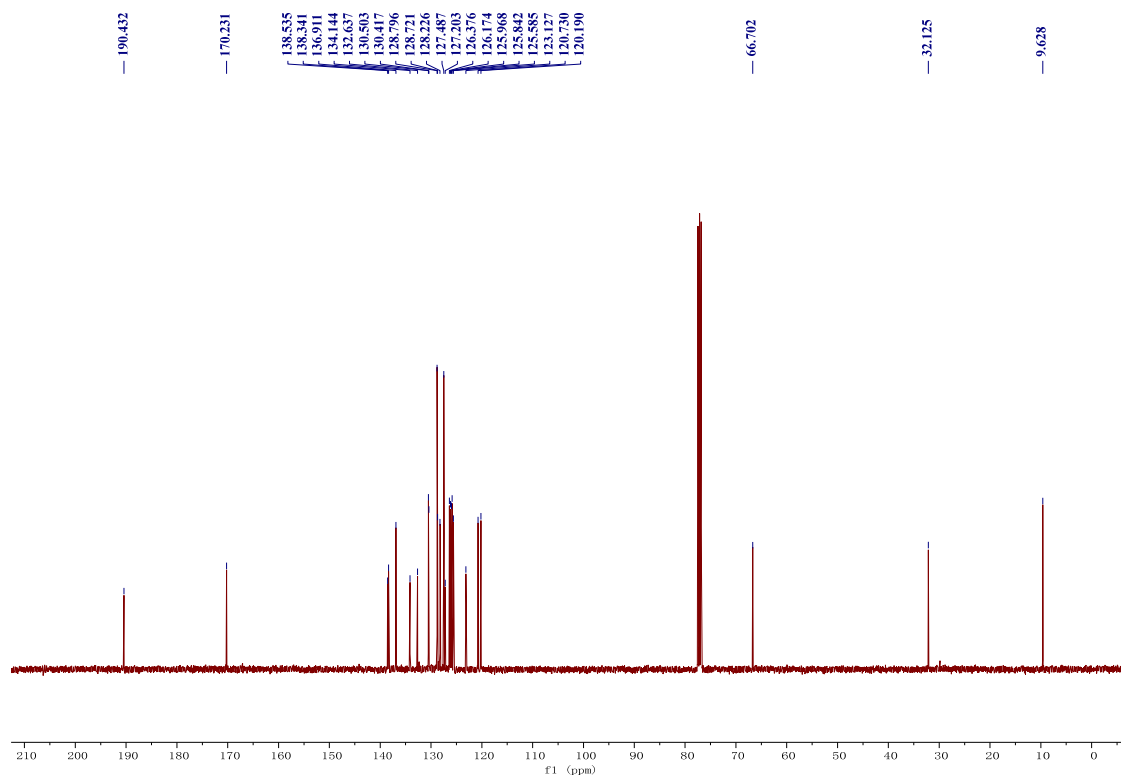

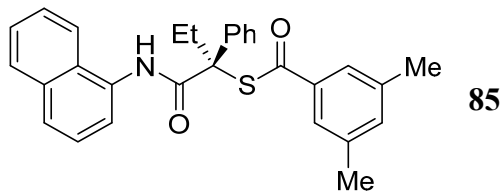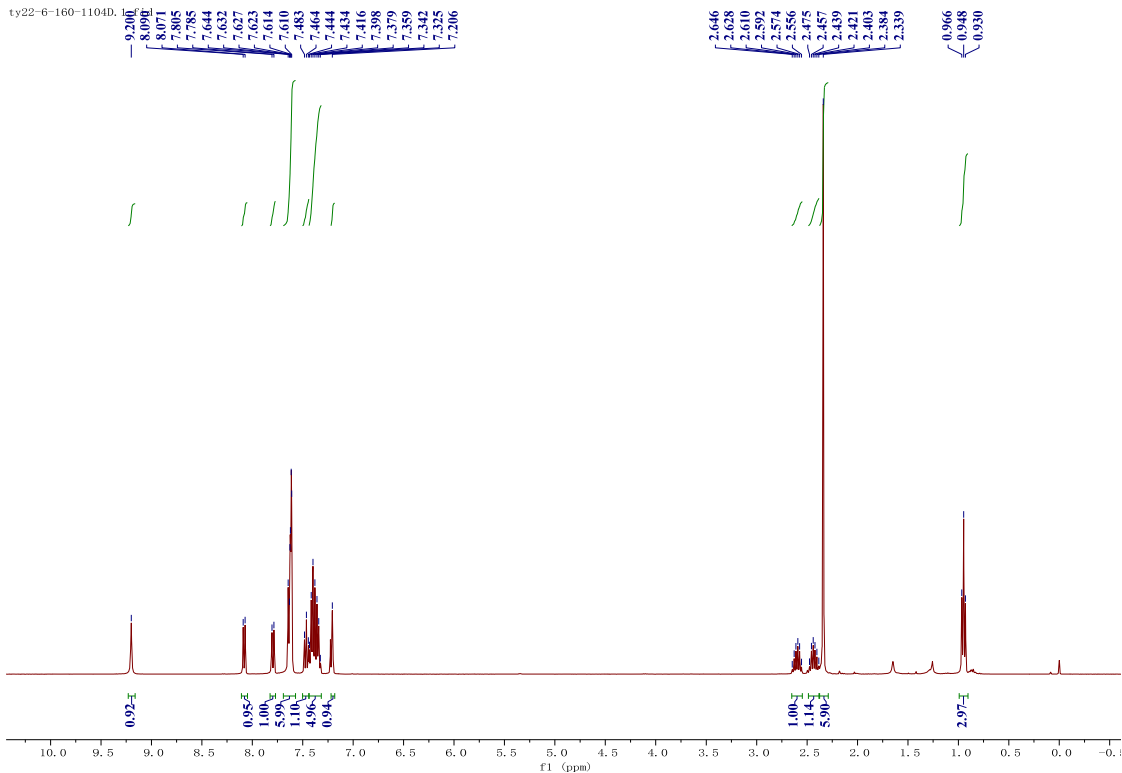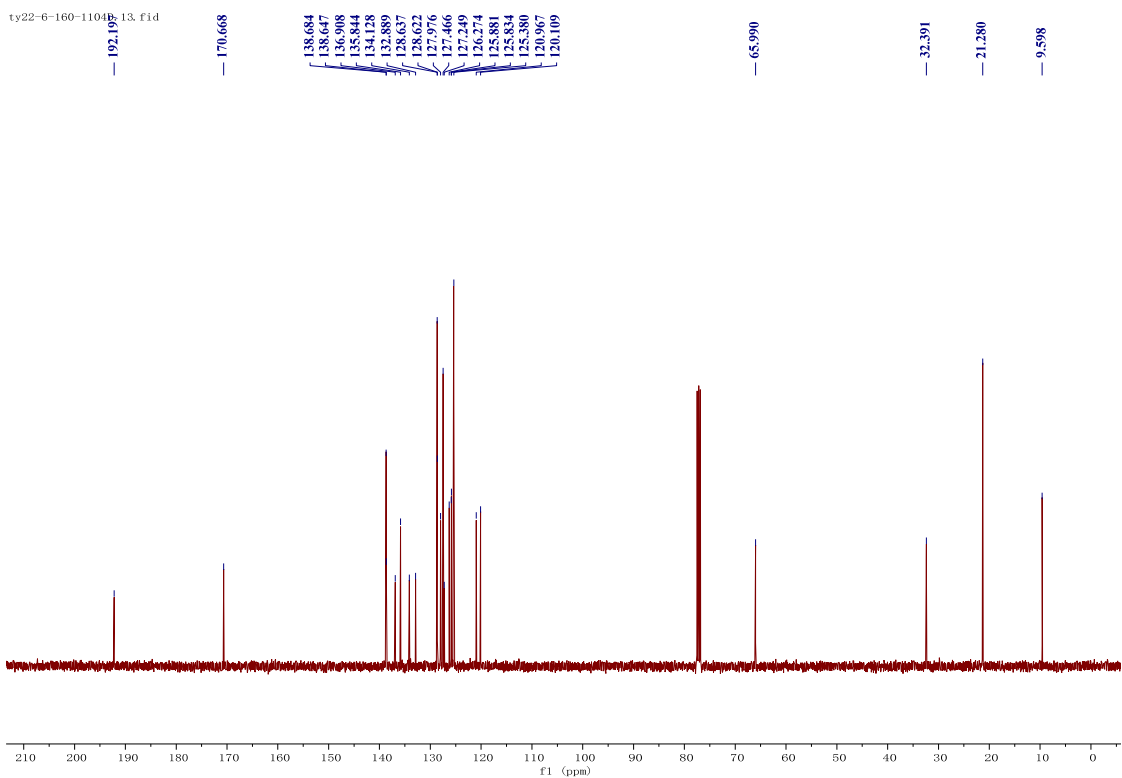

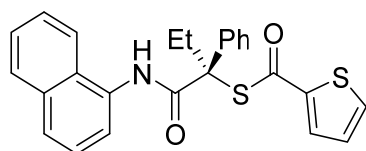

86

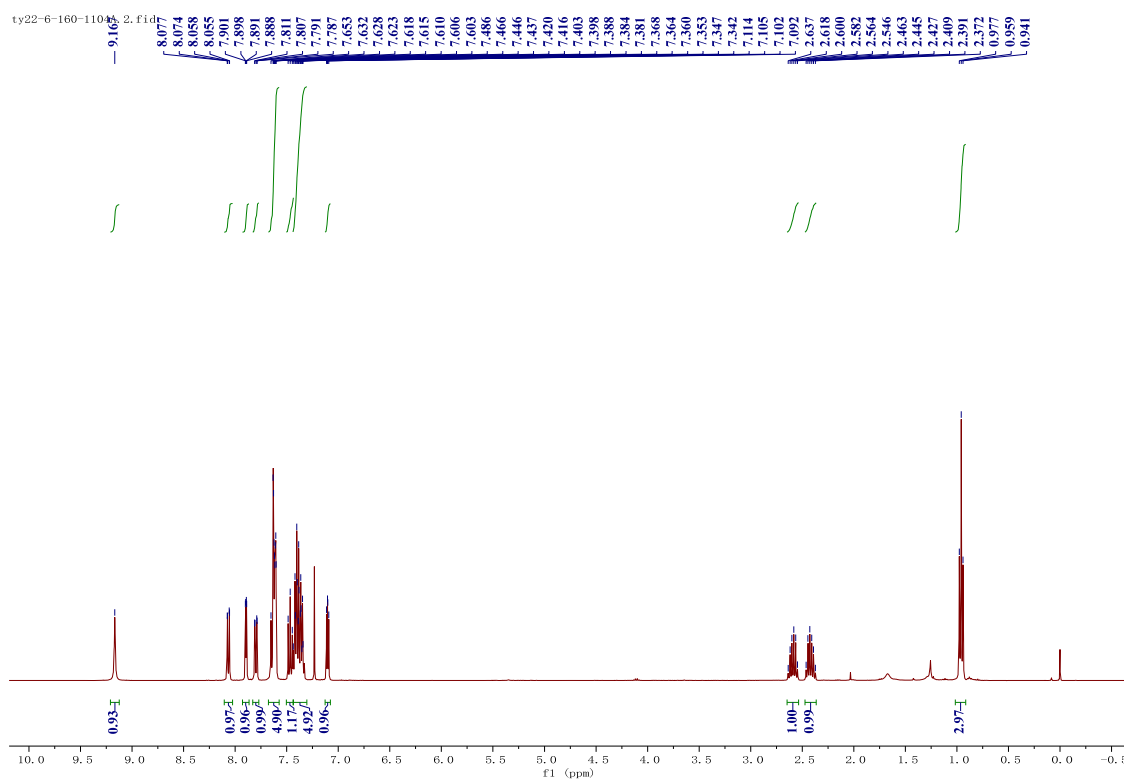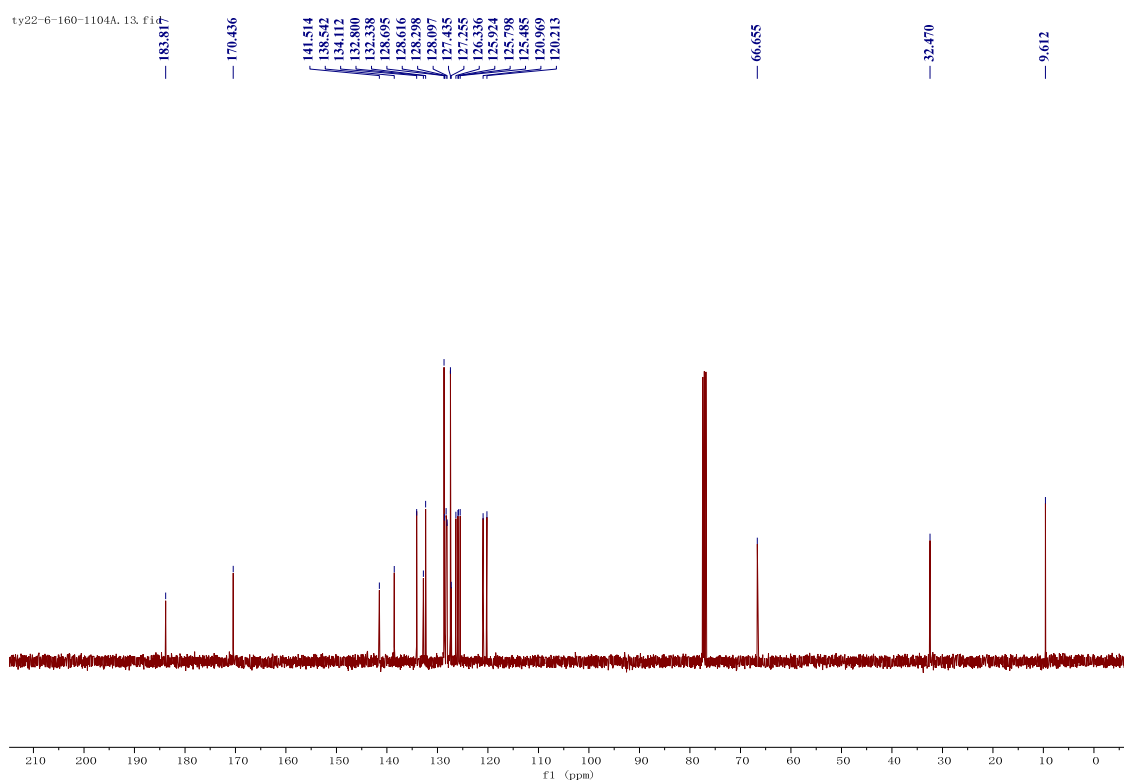



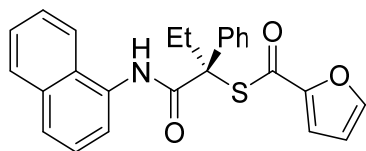

87

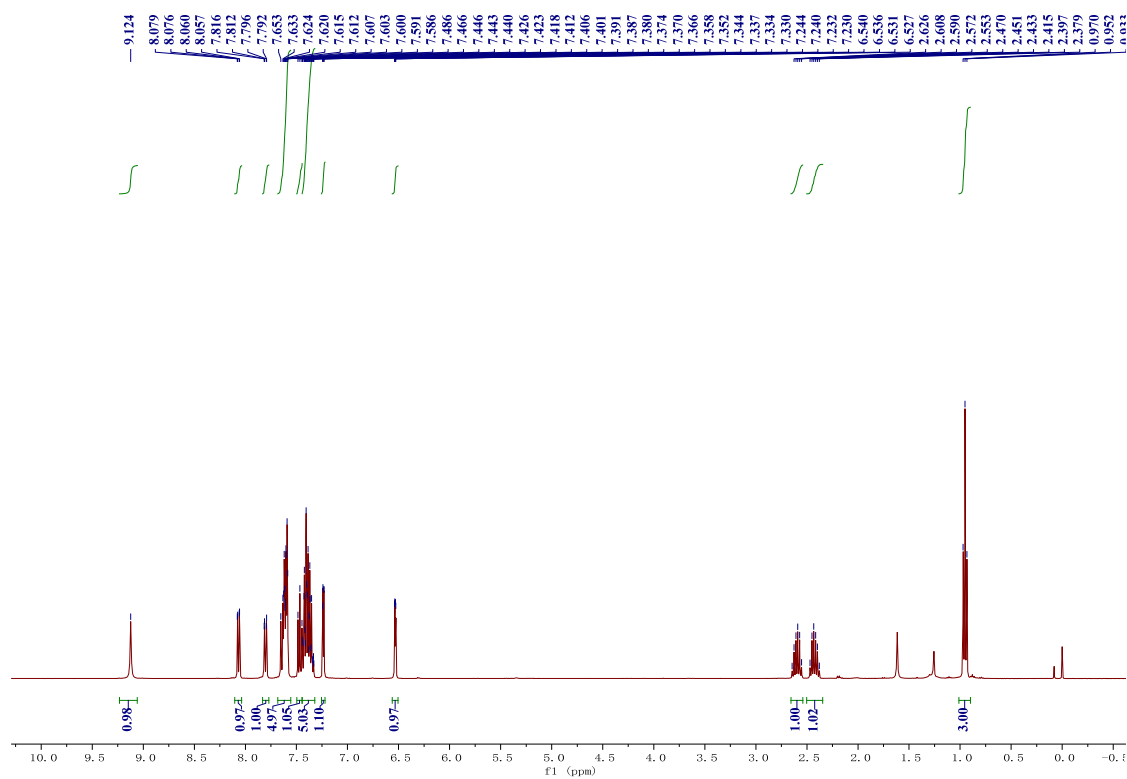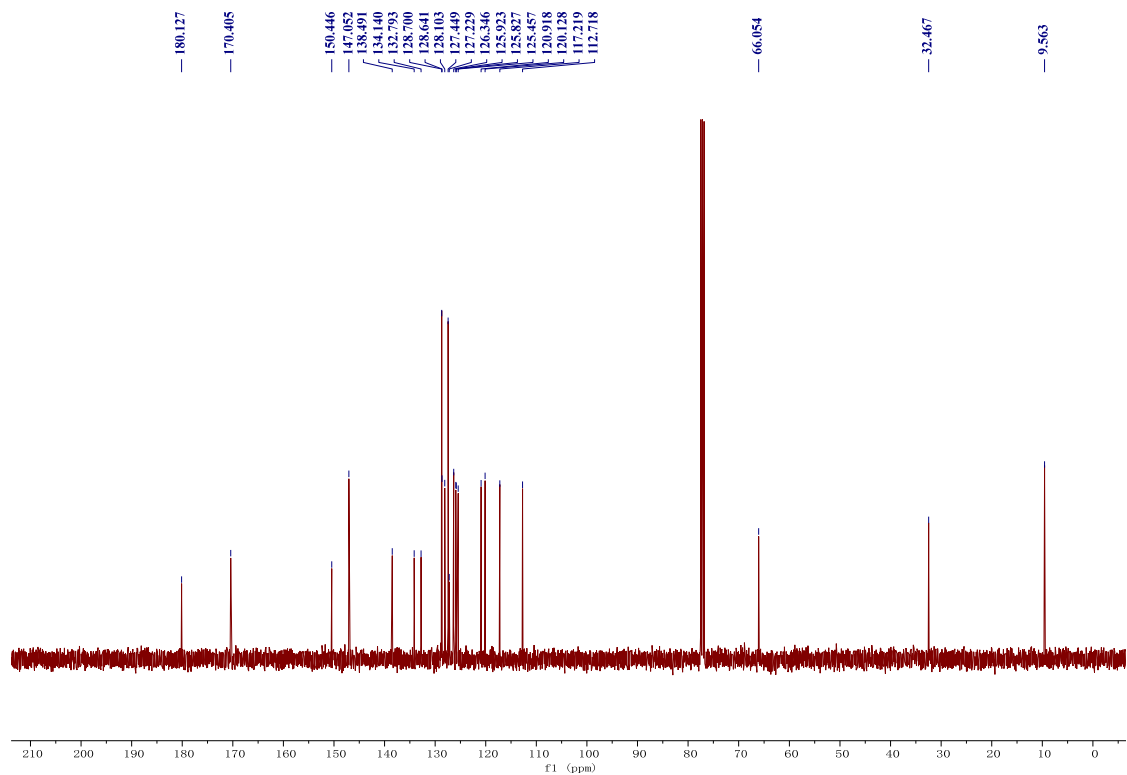

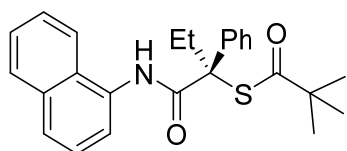

88

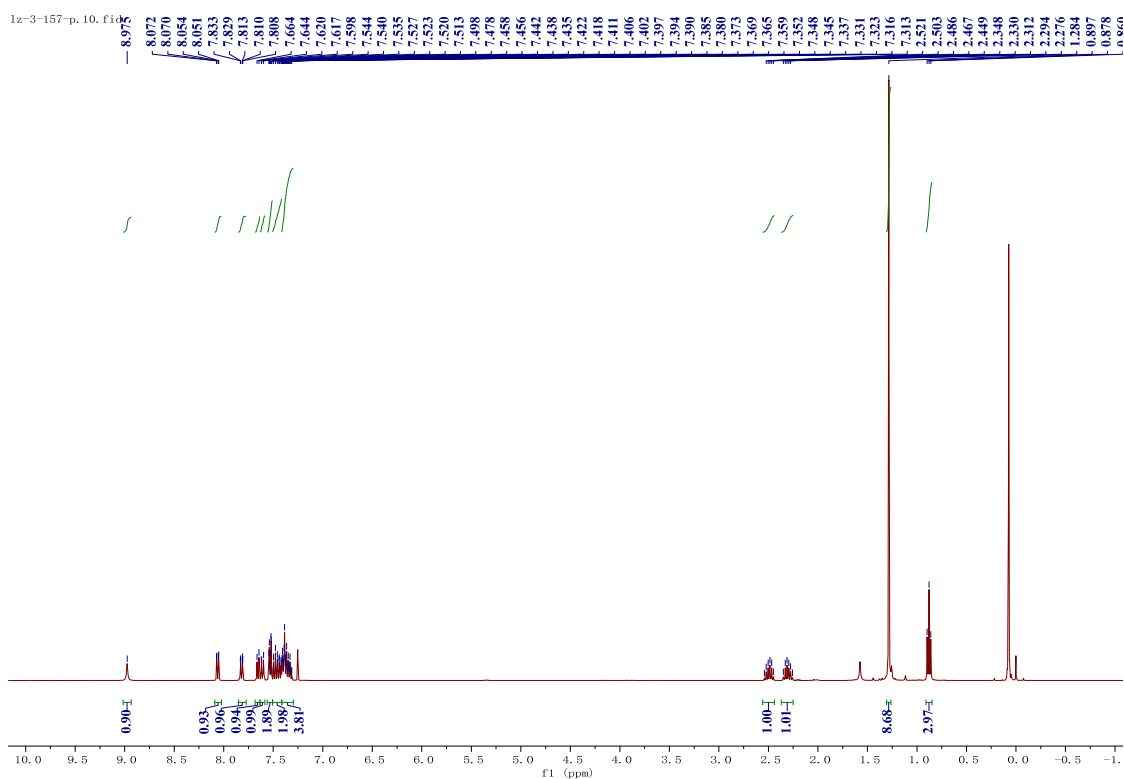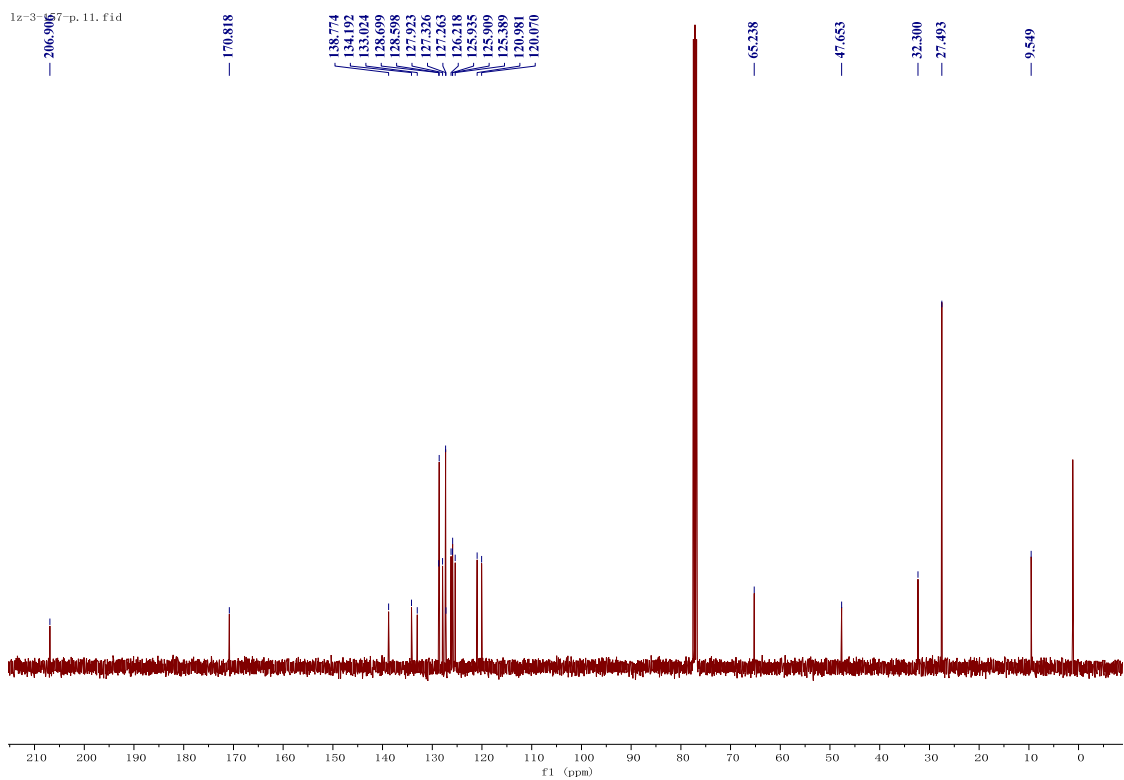

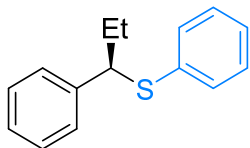

89

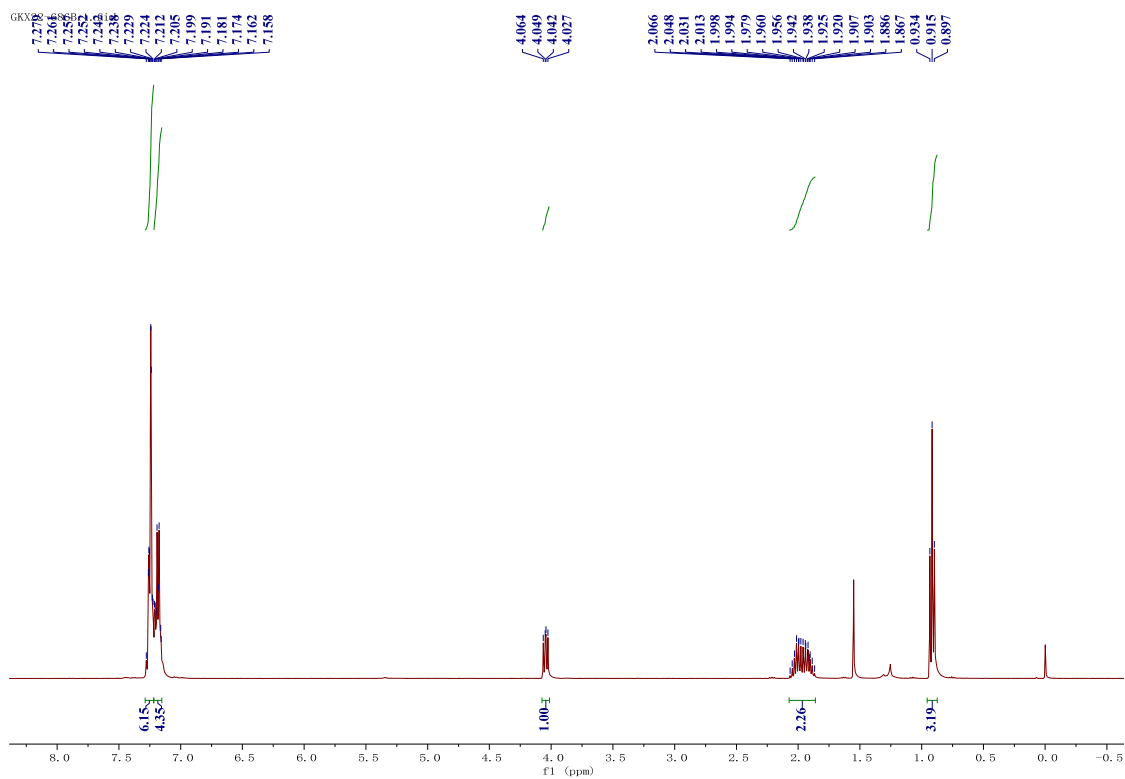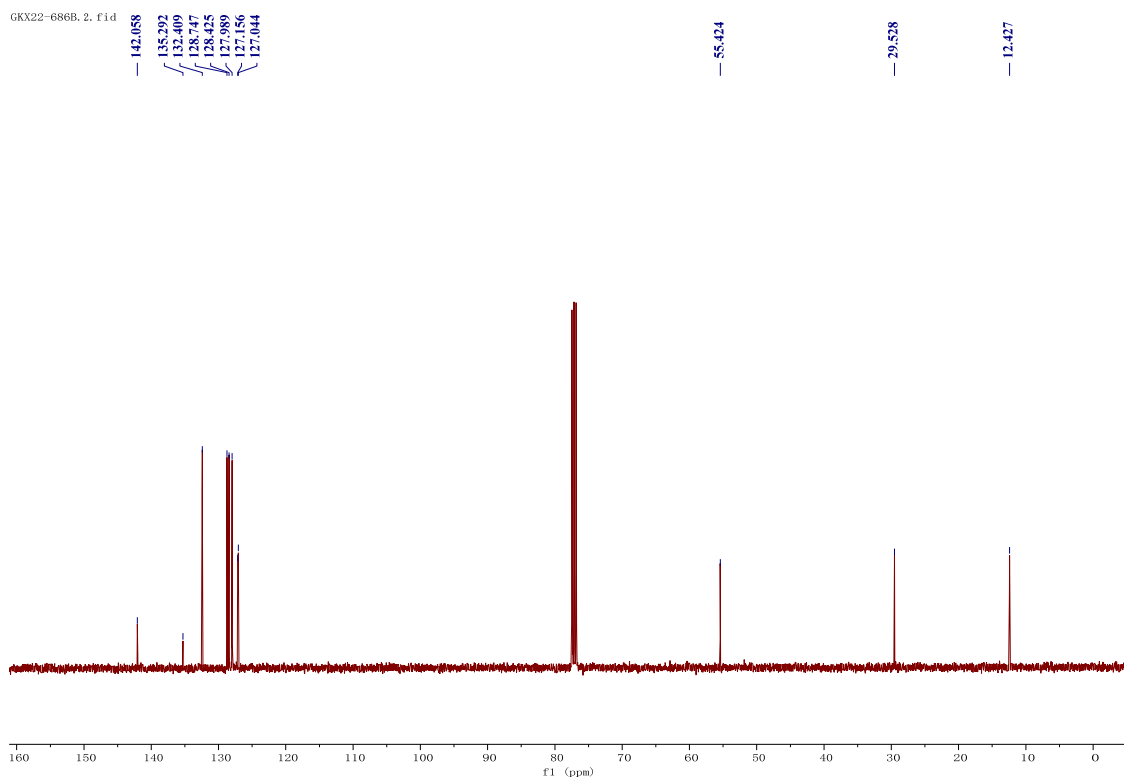

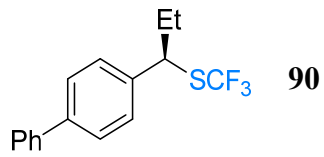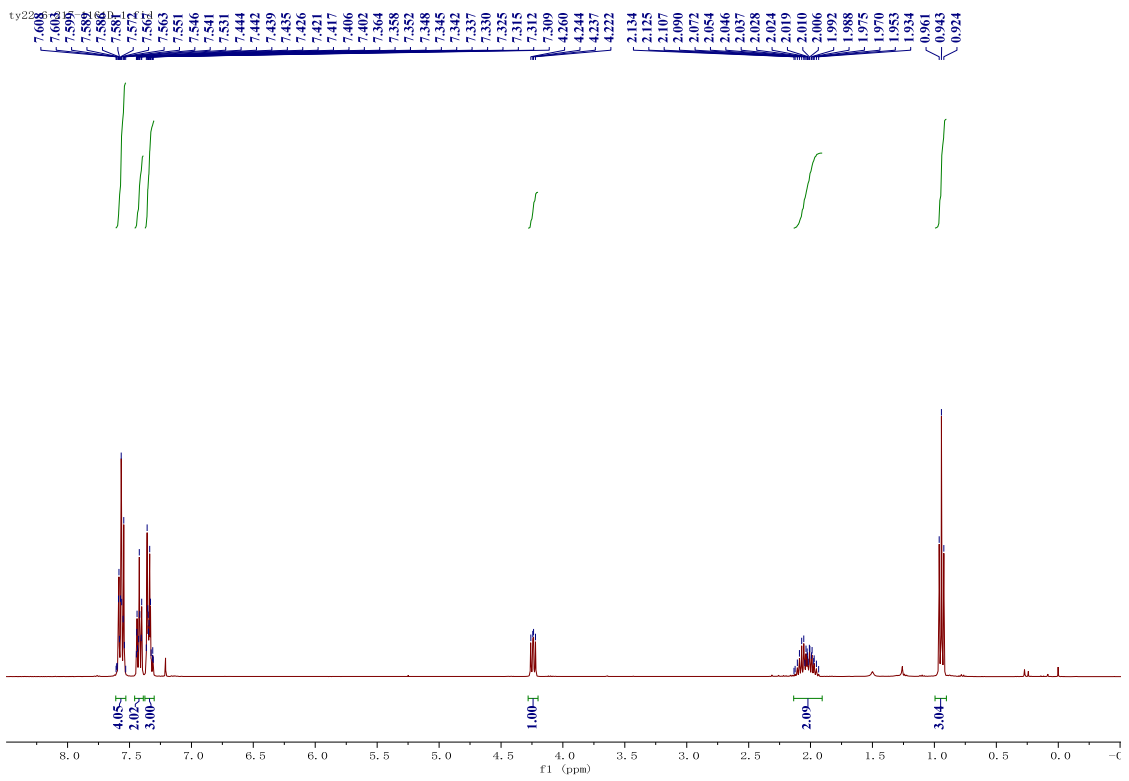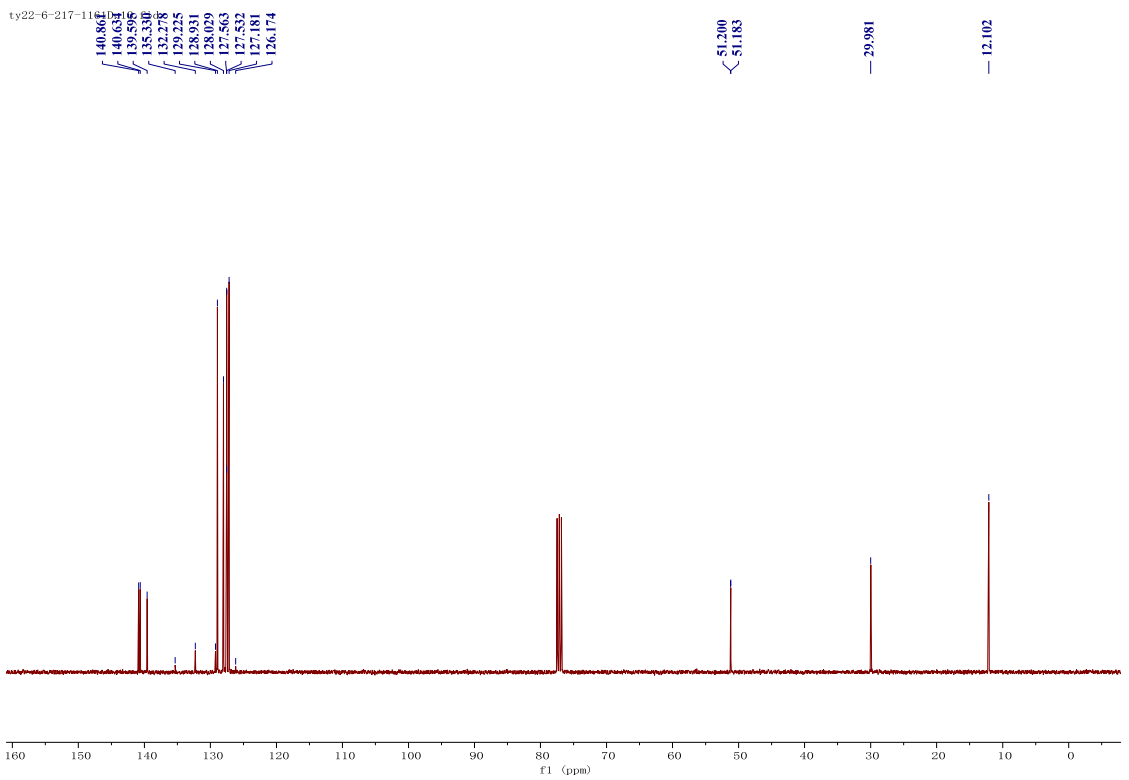

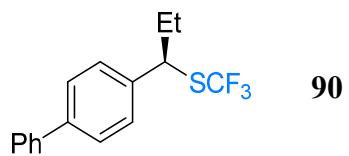

ty22-6-217-1161D, 19, fid

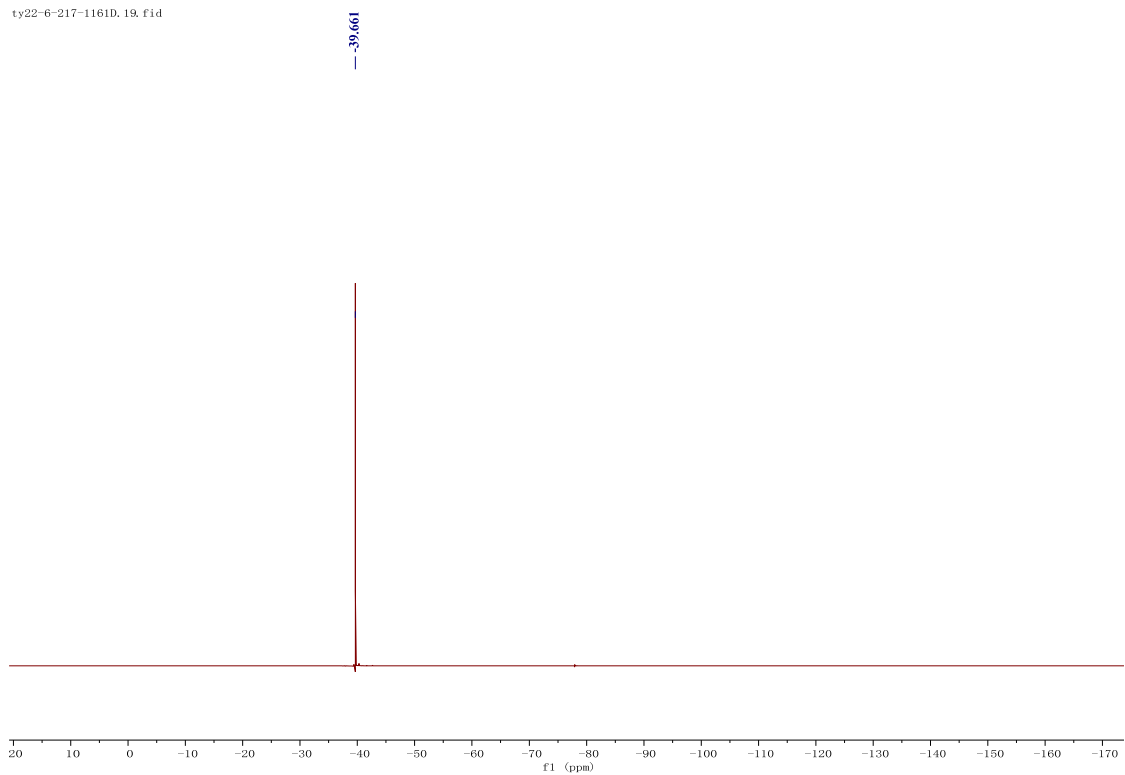

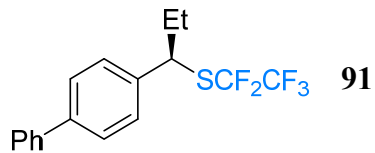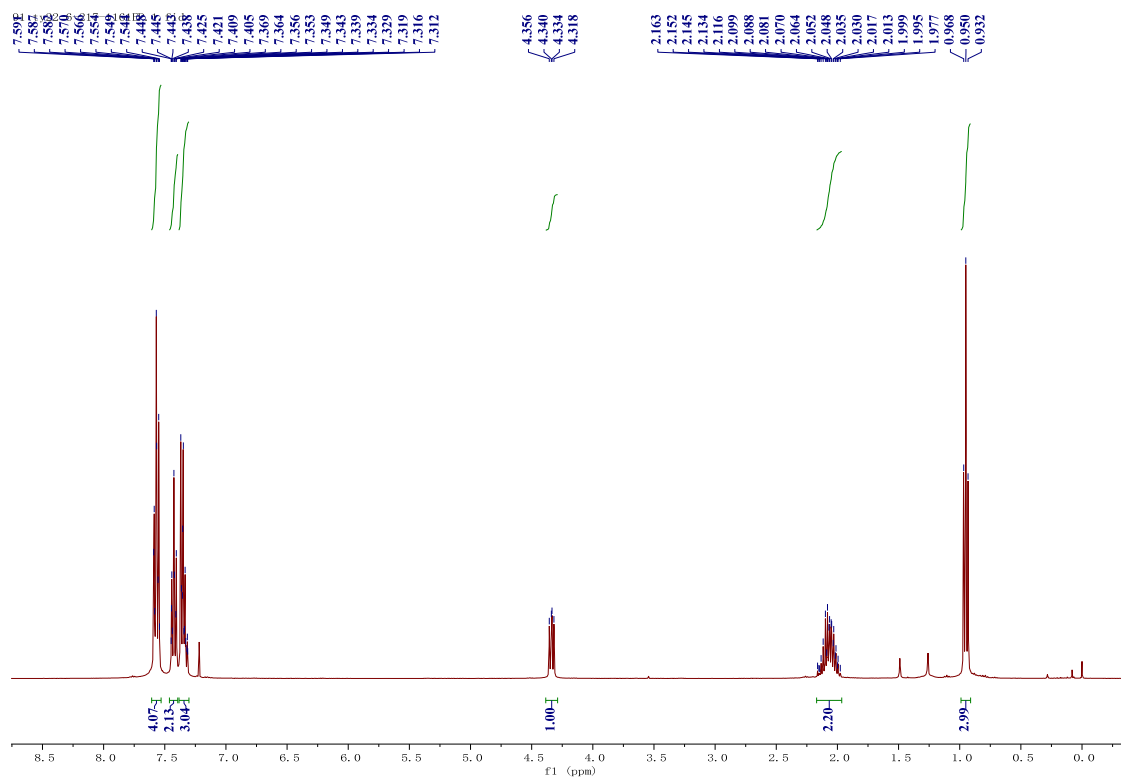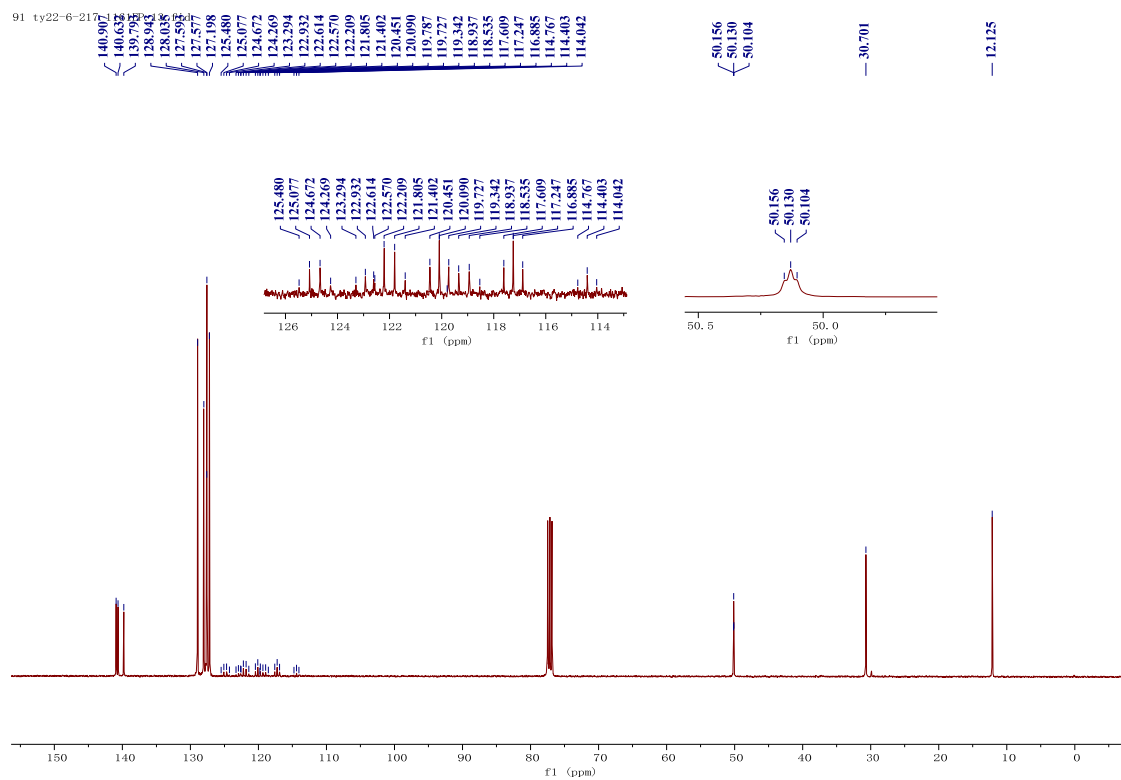

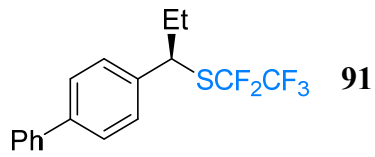

91 ty22-6-217-1161EP.19.fid

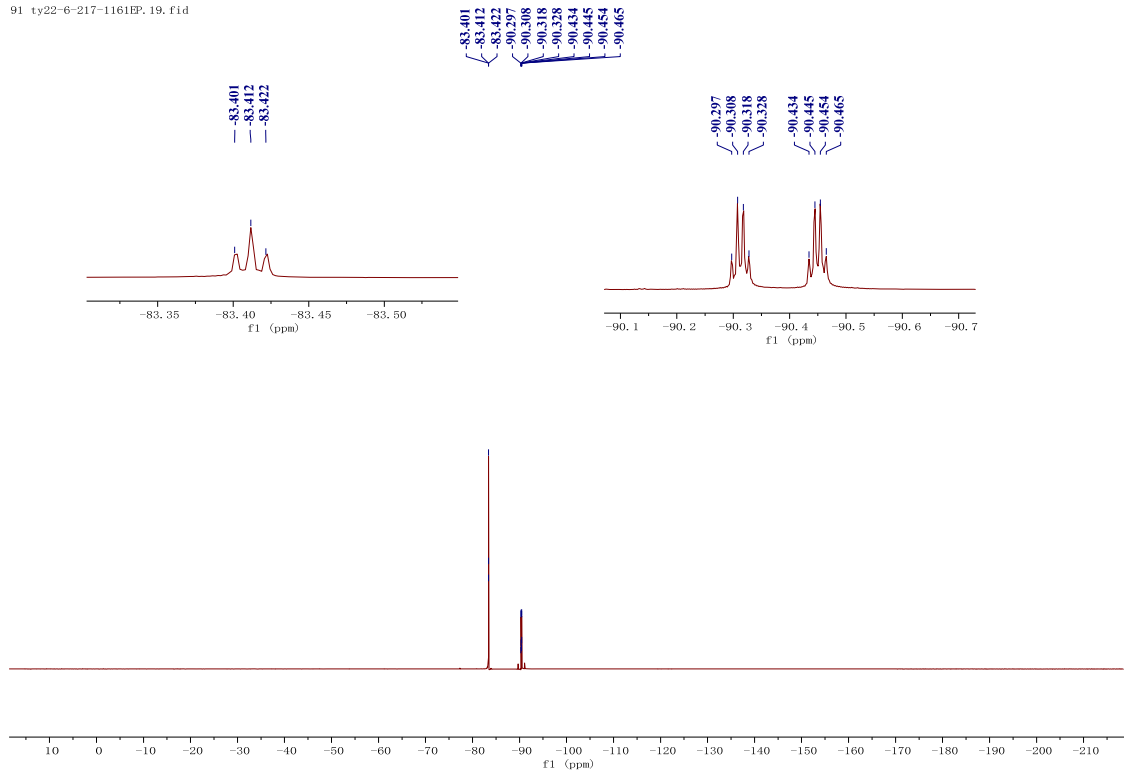

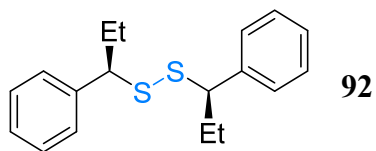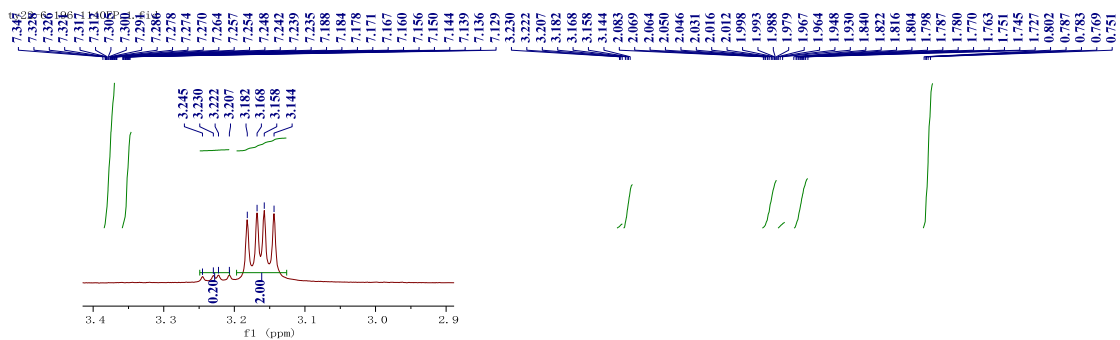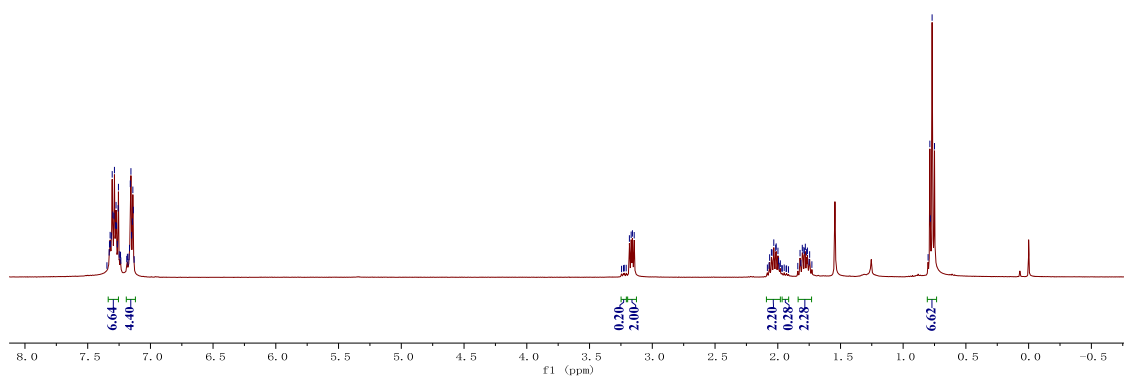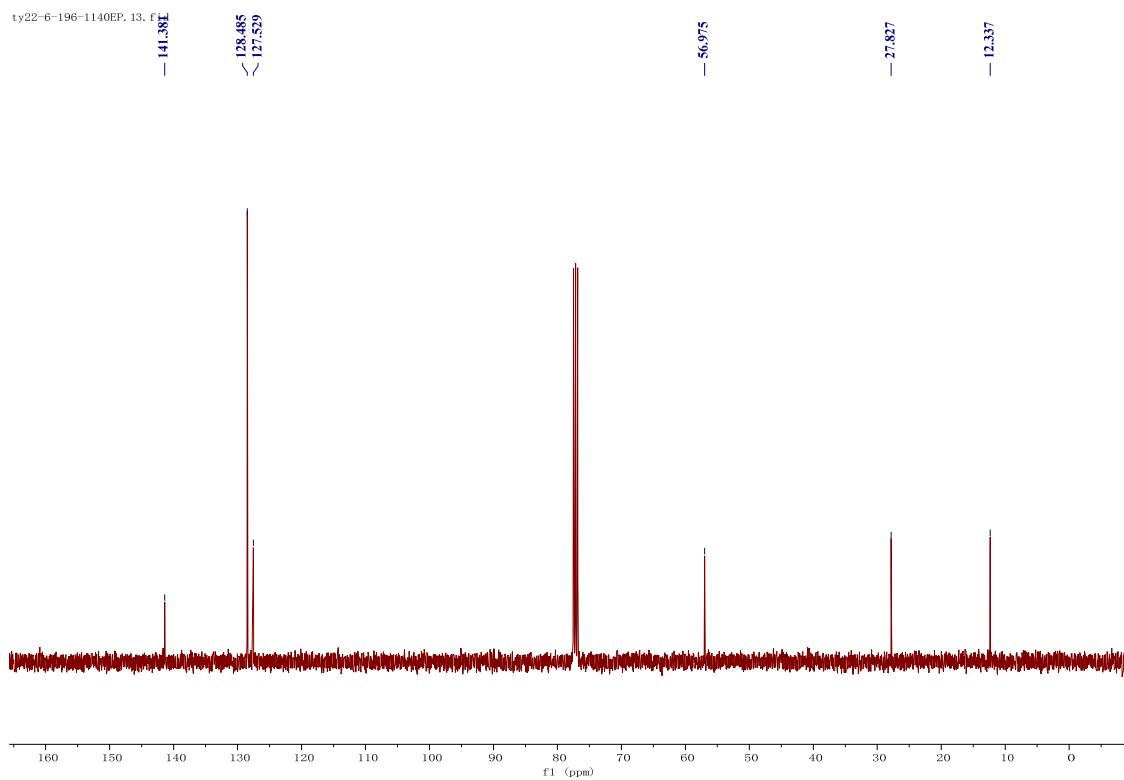



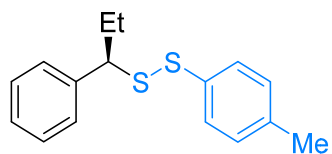

93

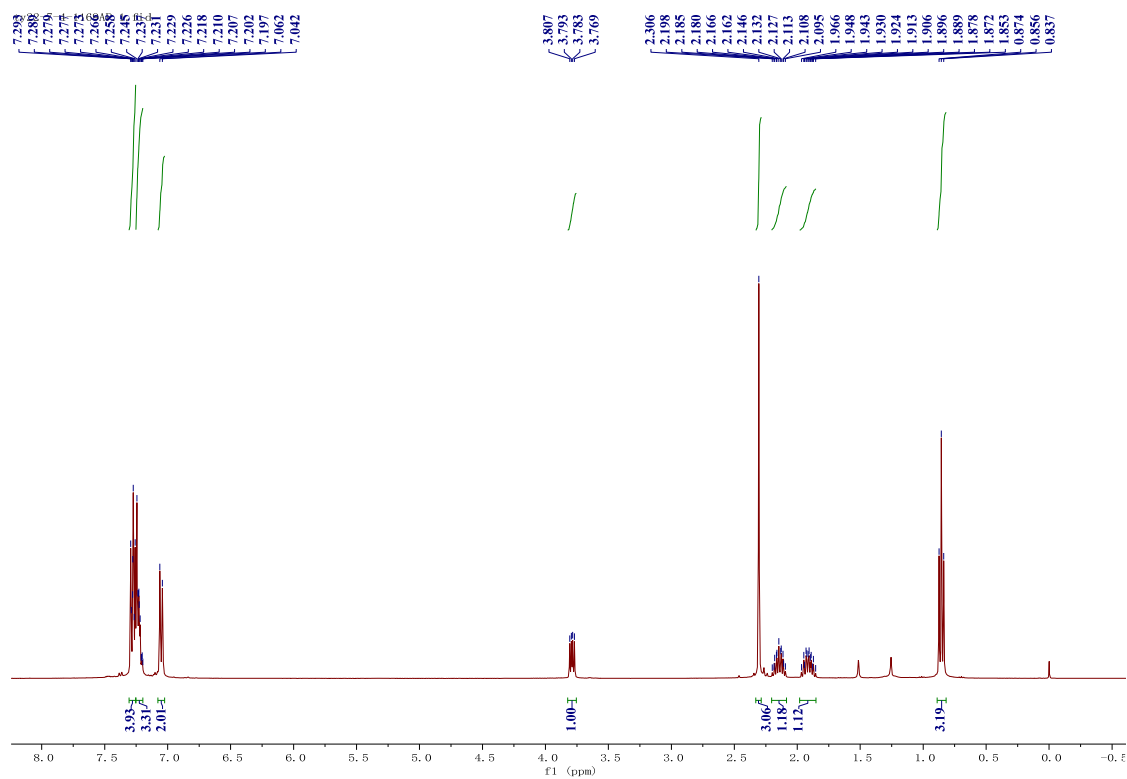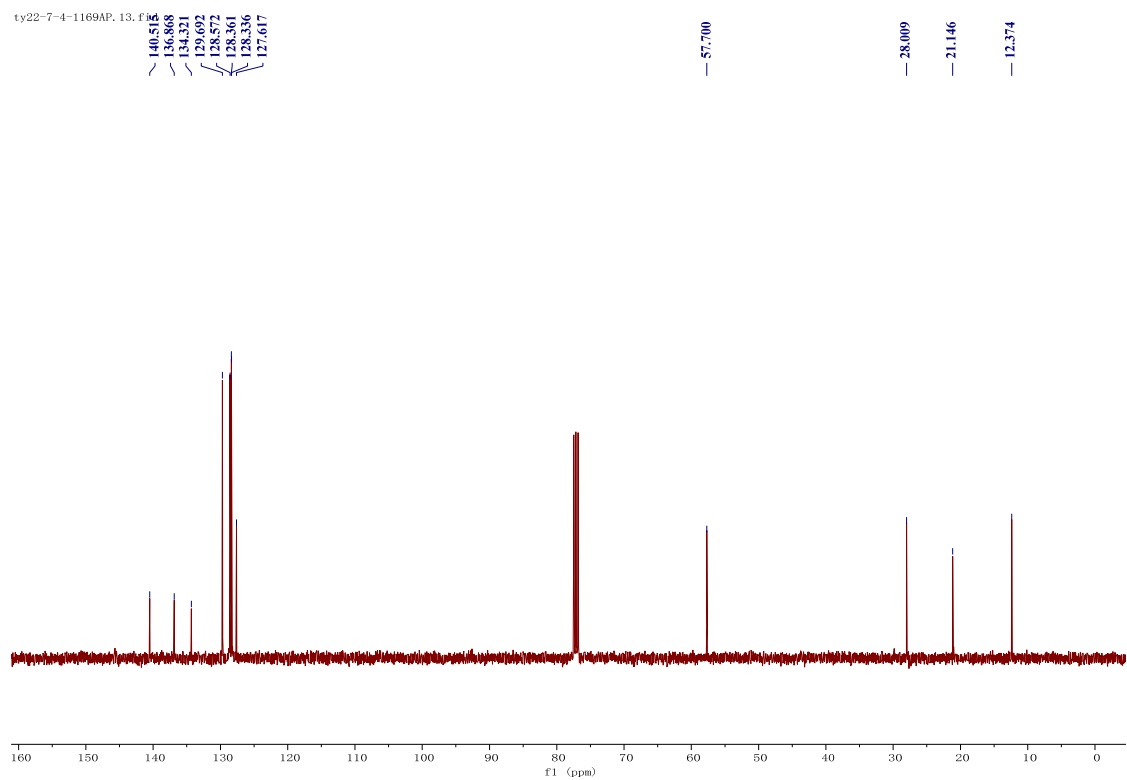

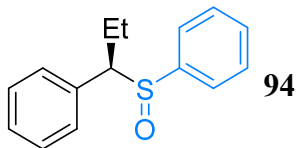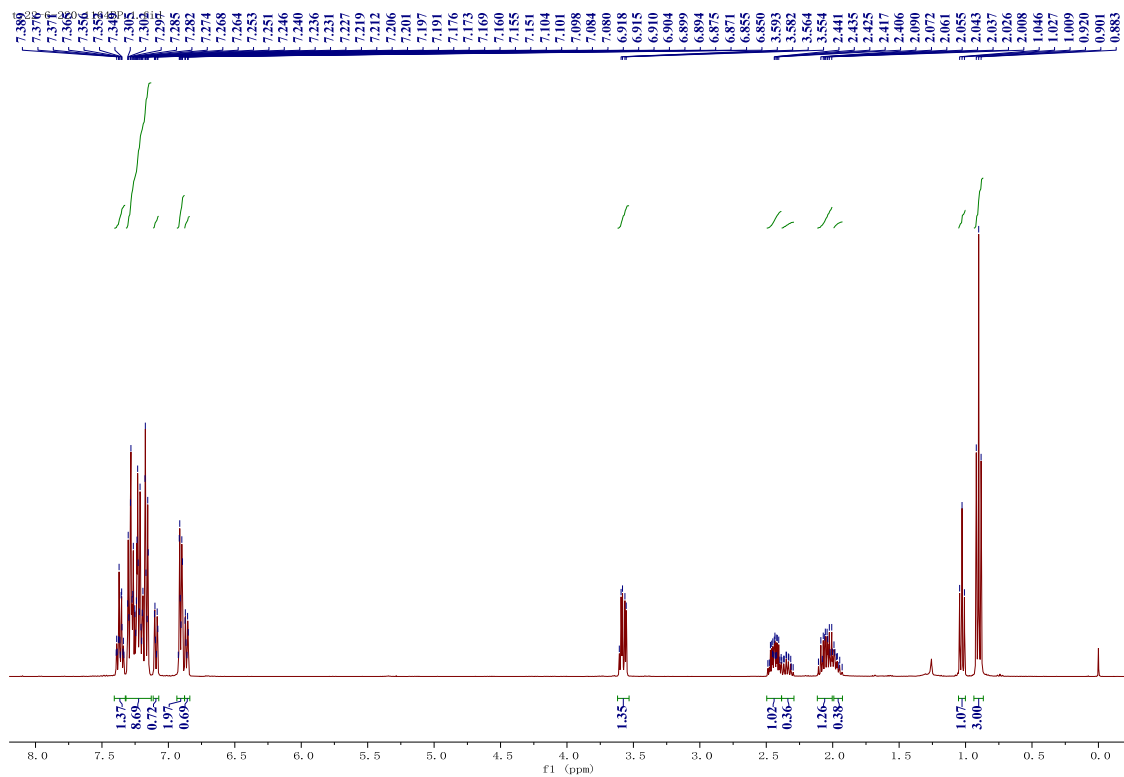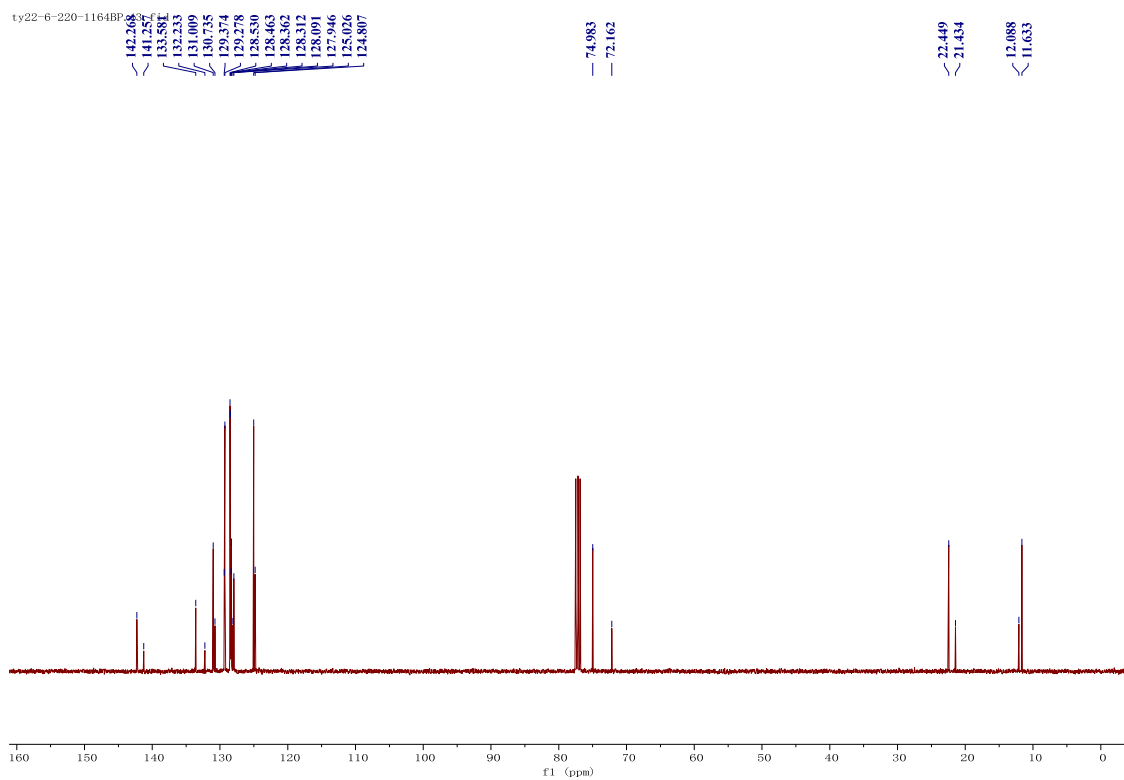

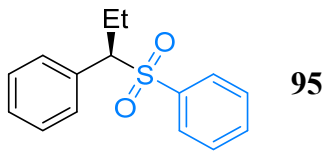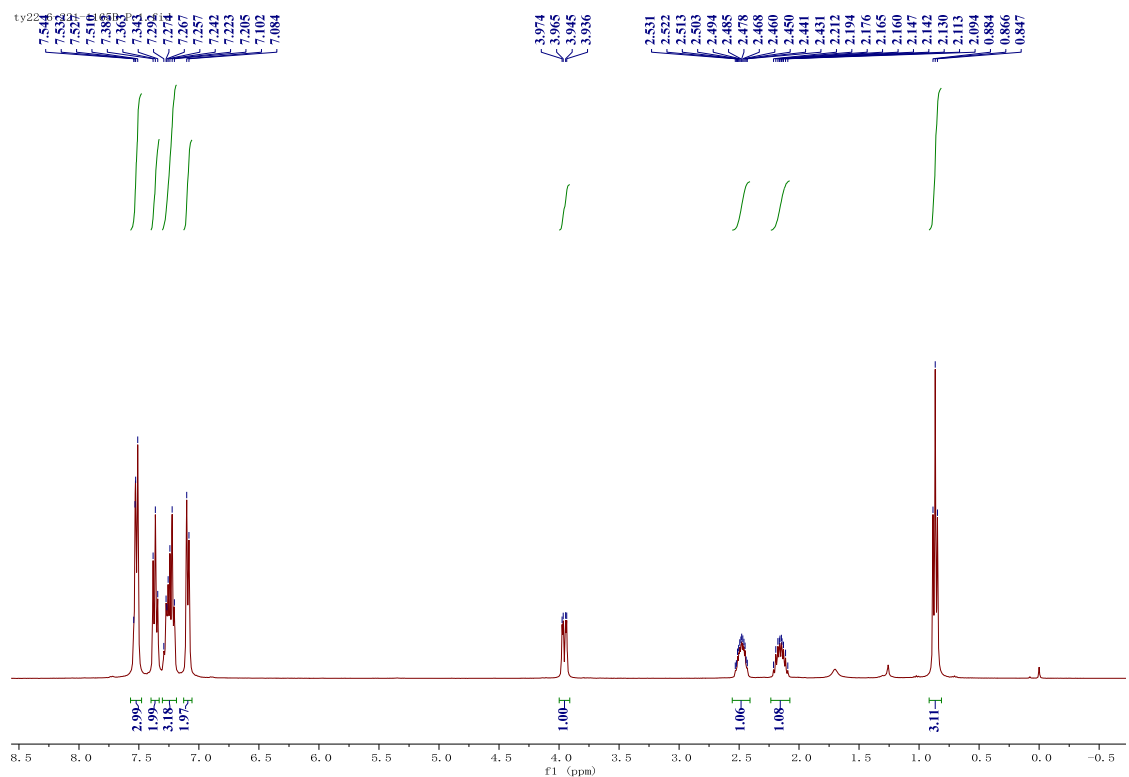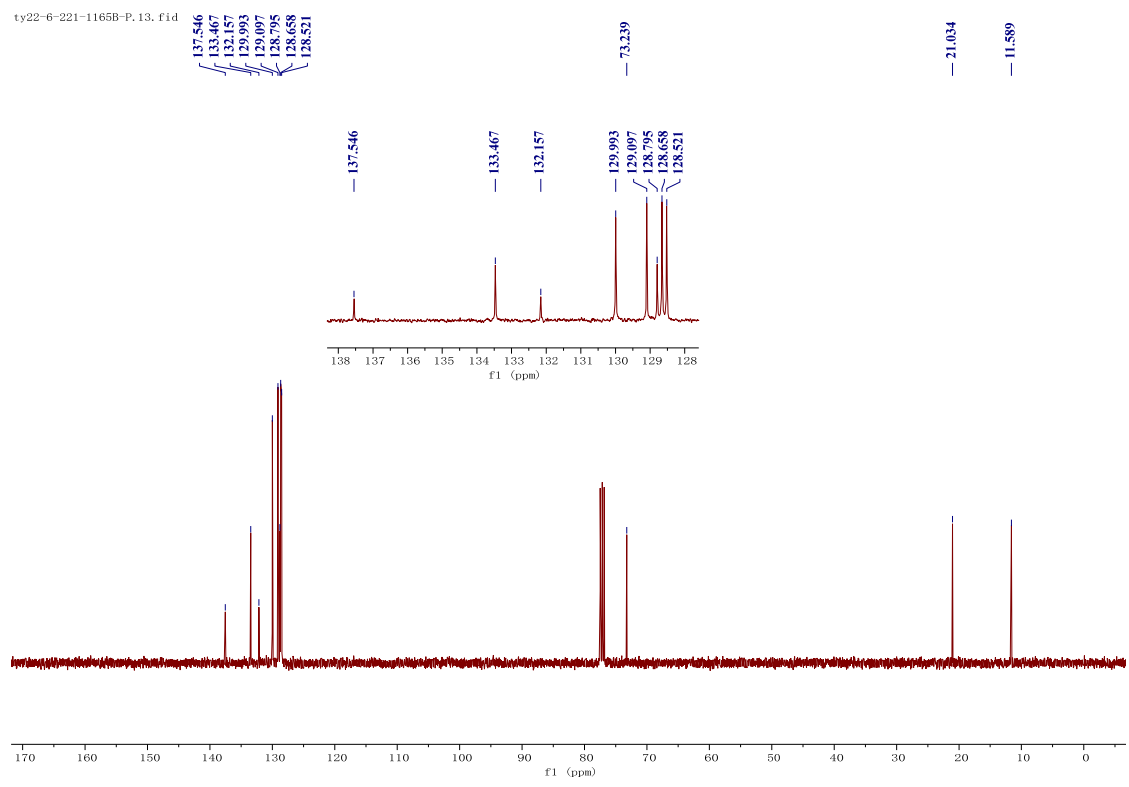

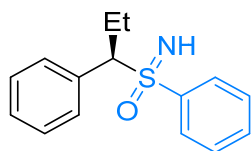

96

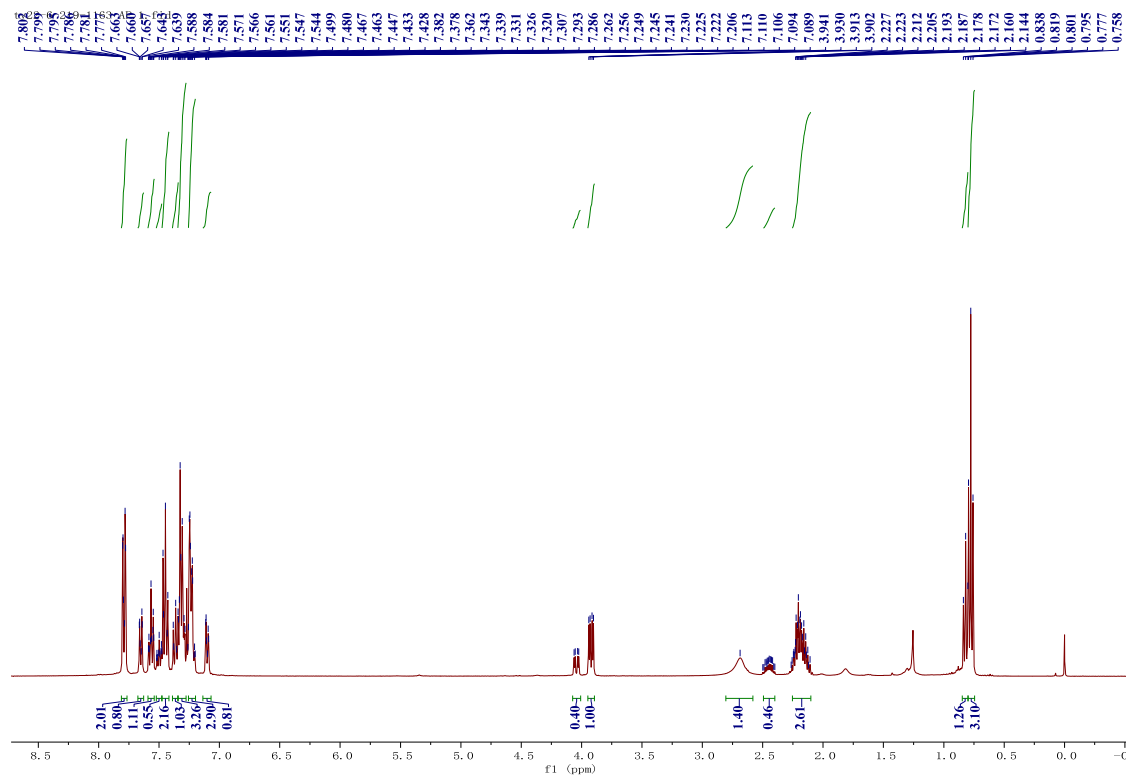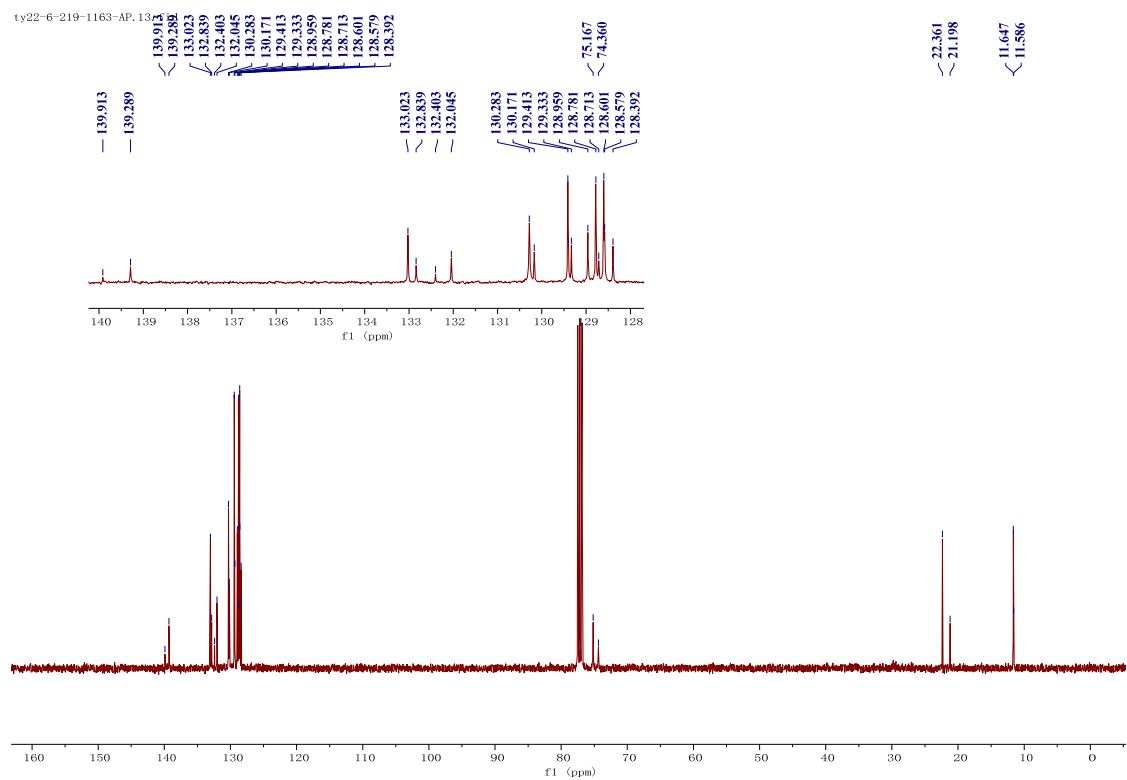

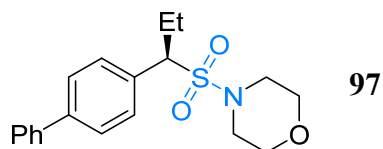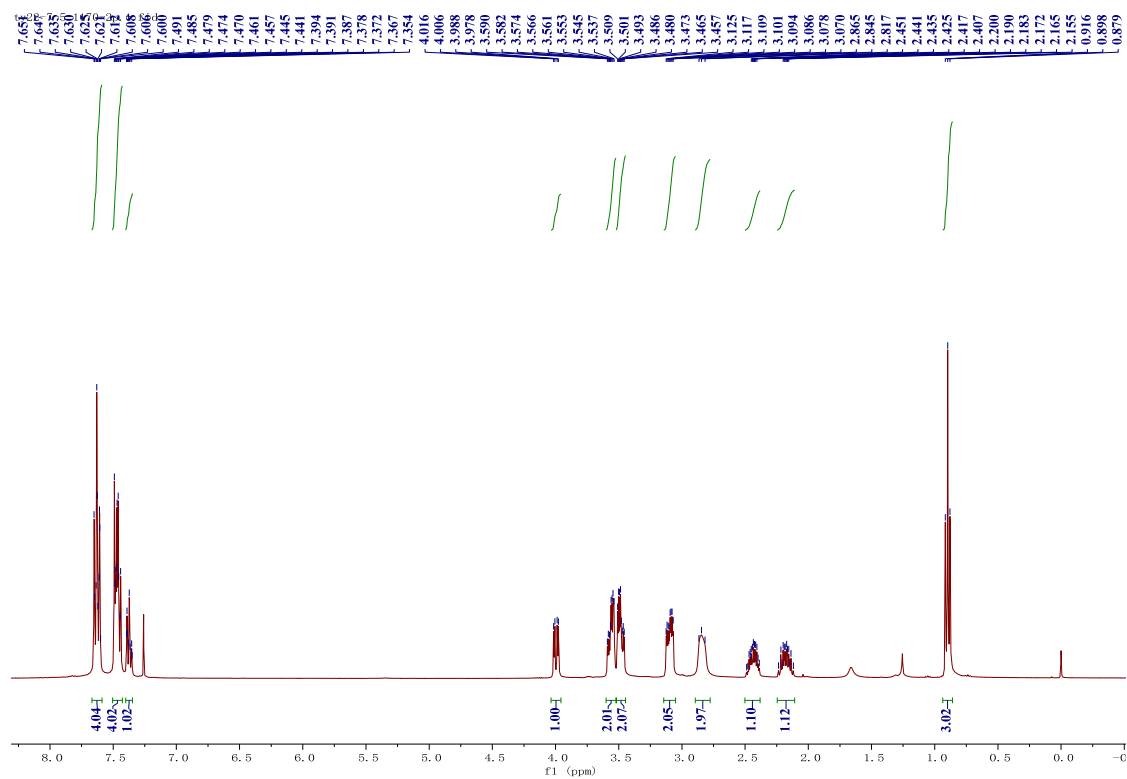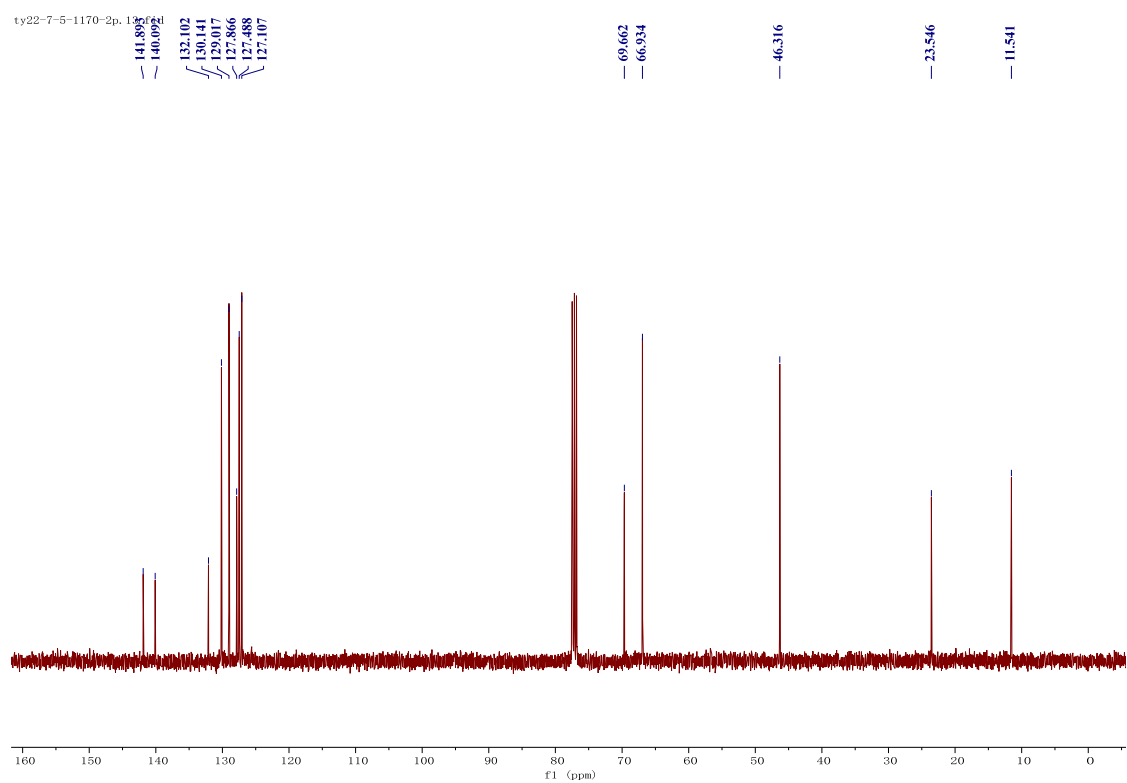

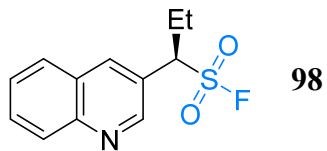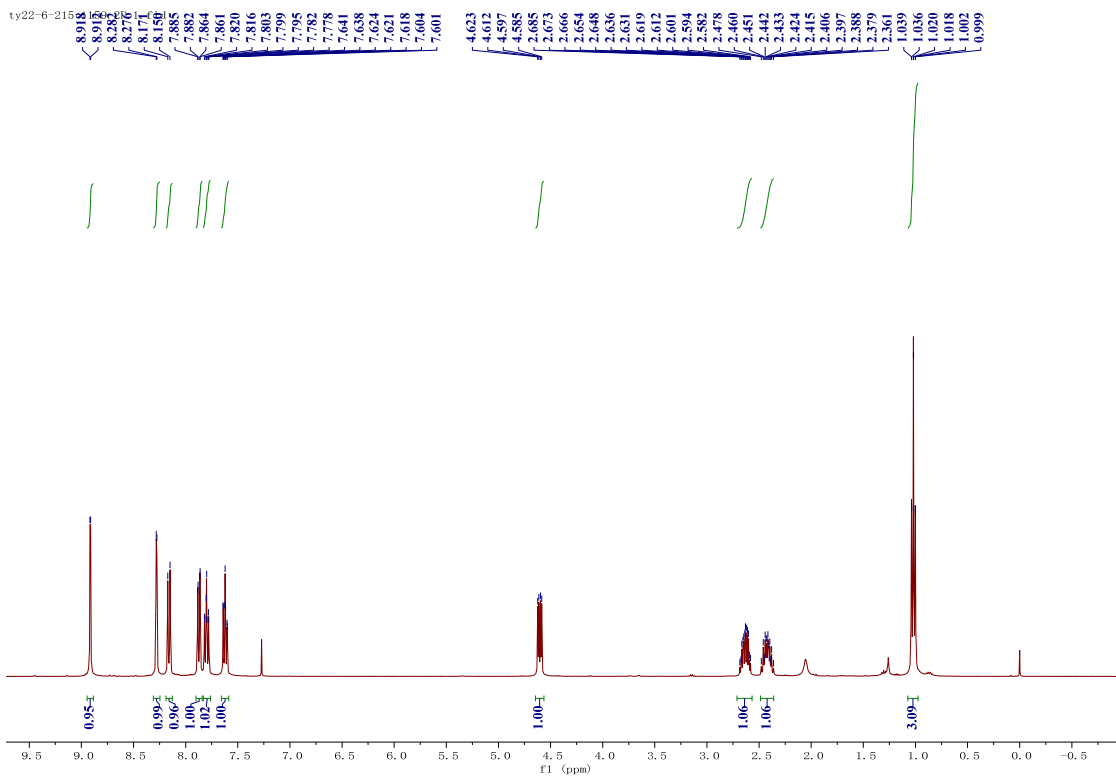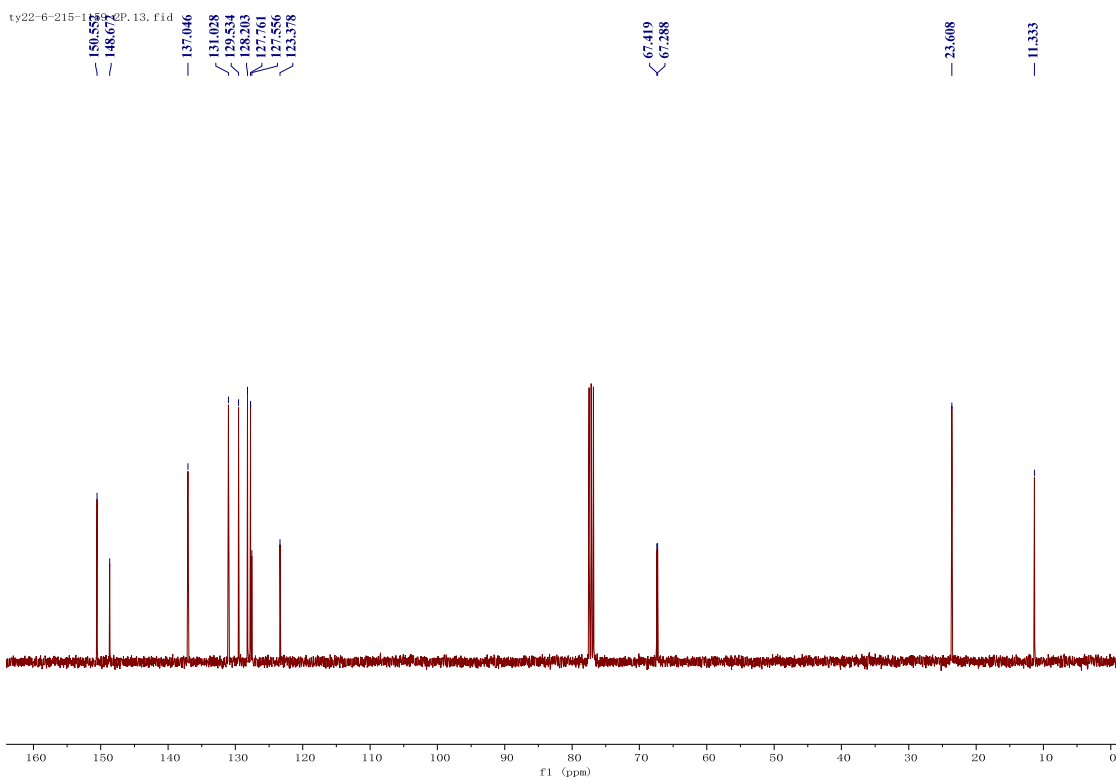

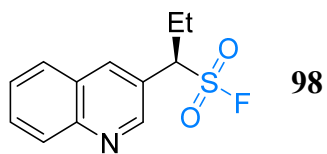

ty22-6-215-1159-2P.19.fid

46.441

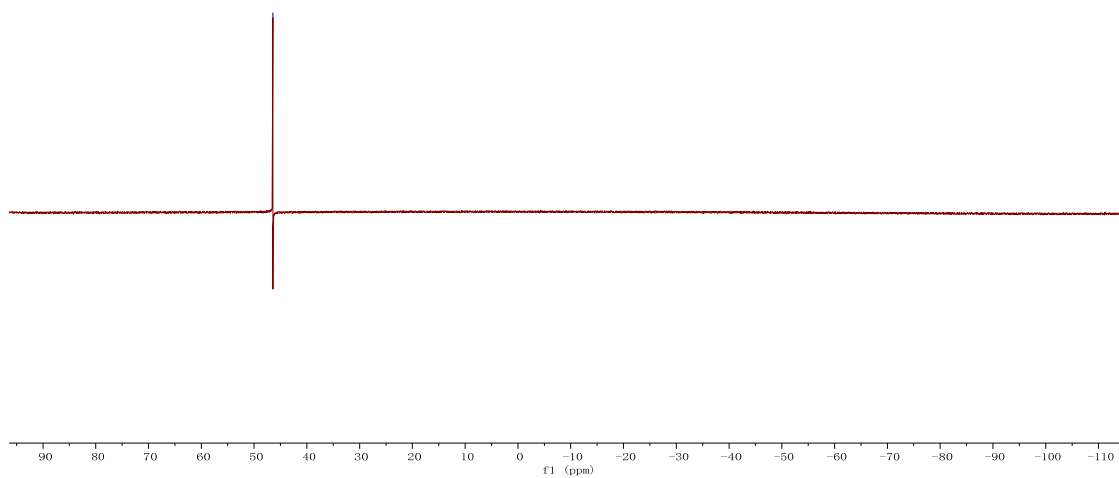

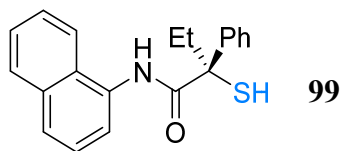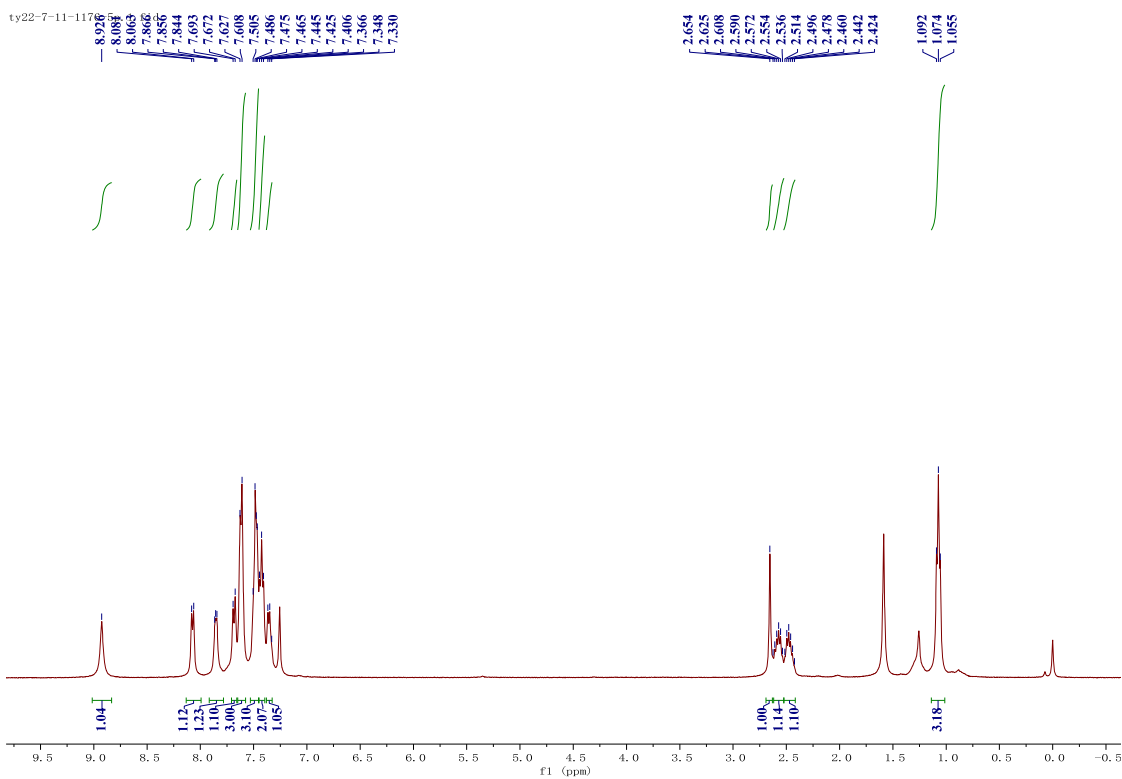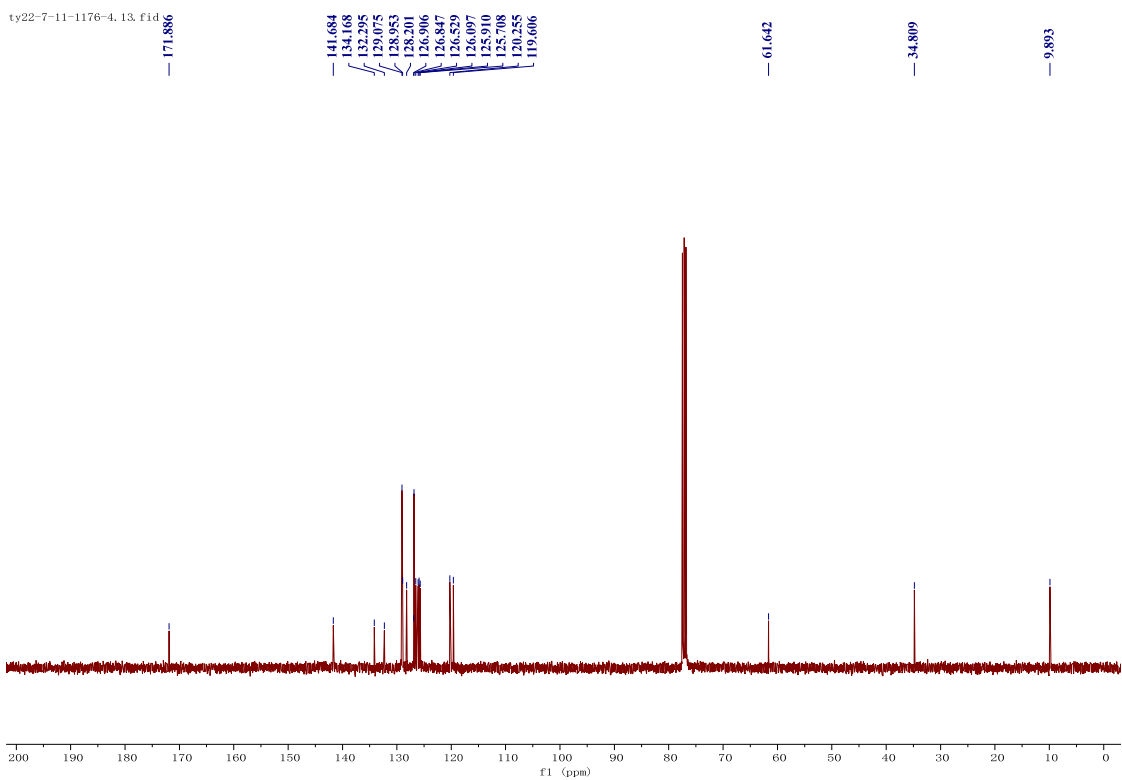



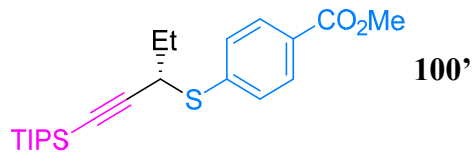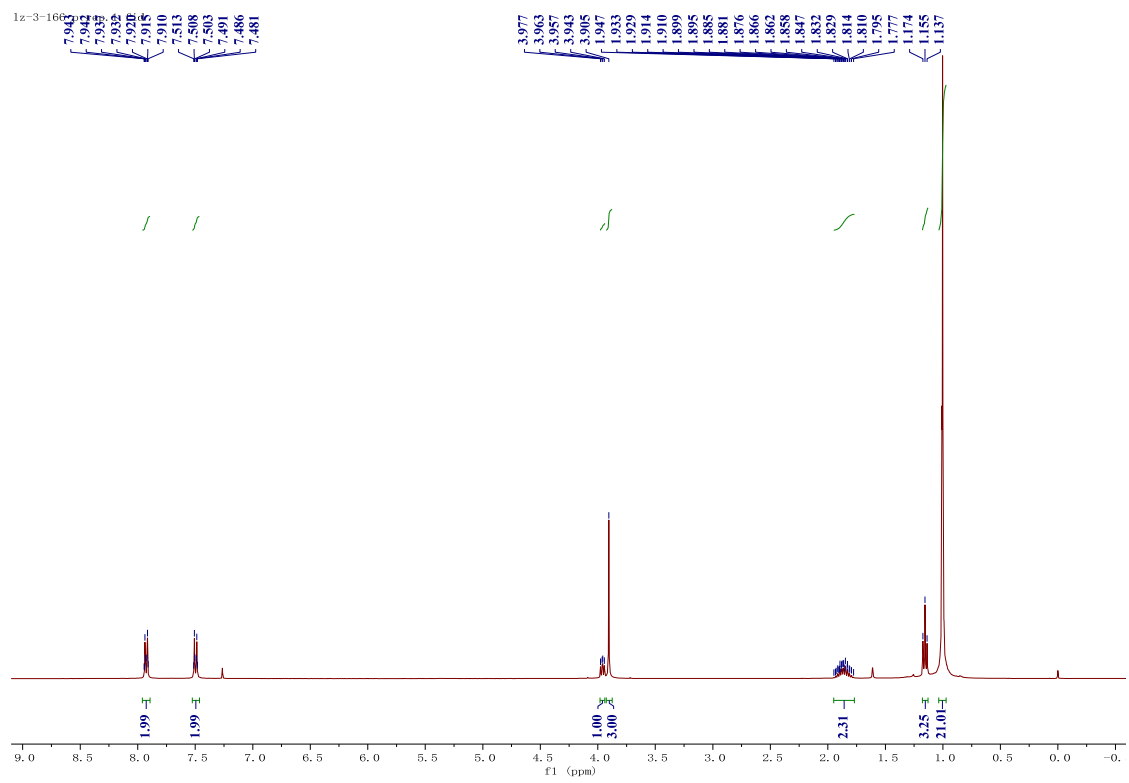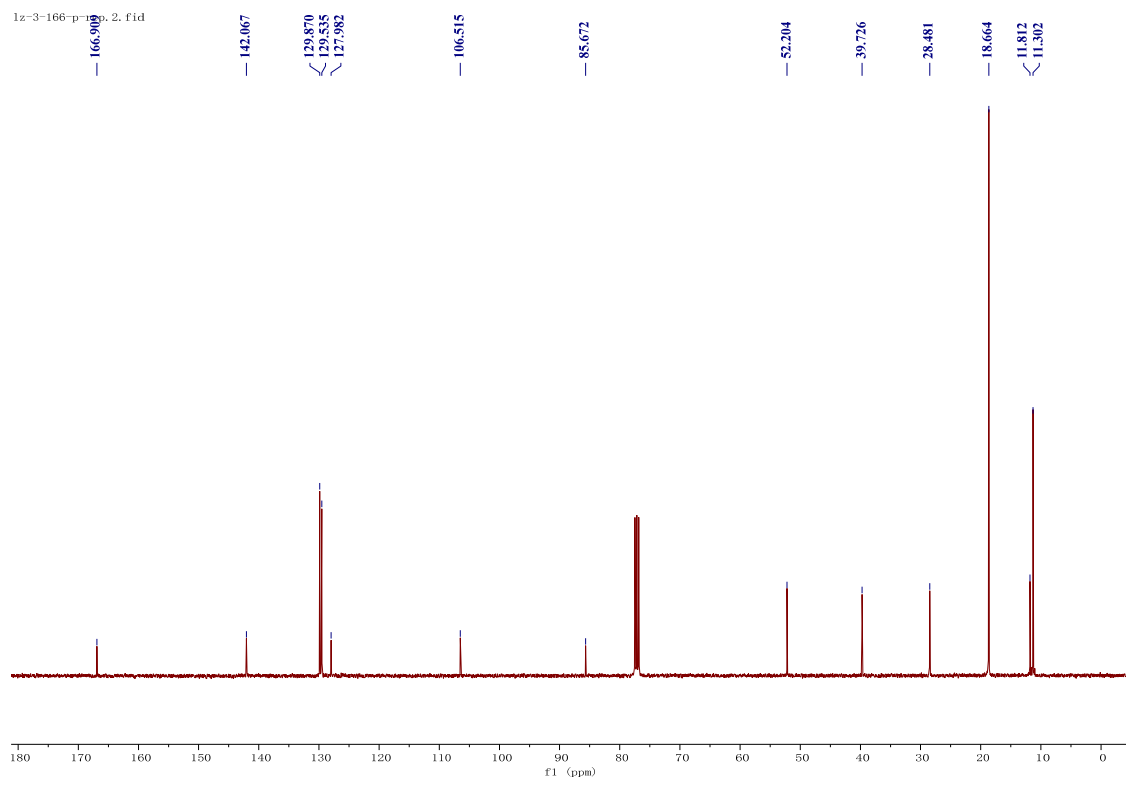

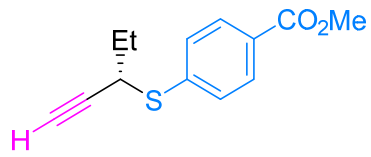

100

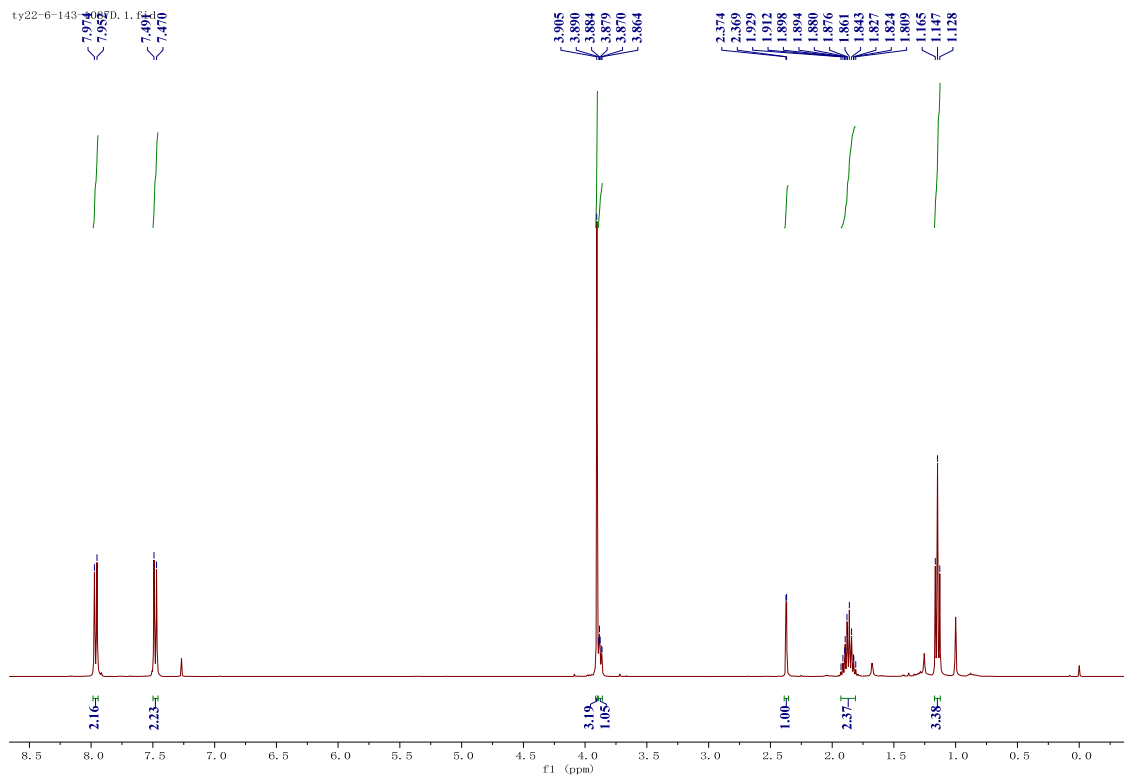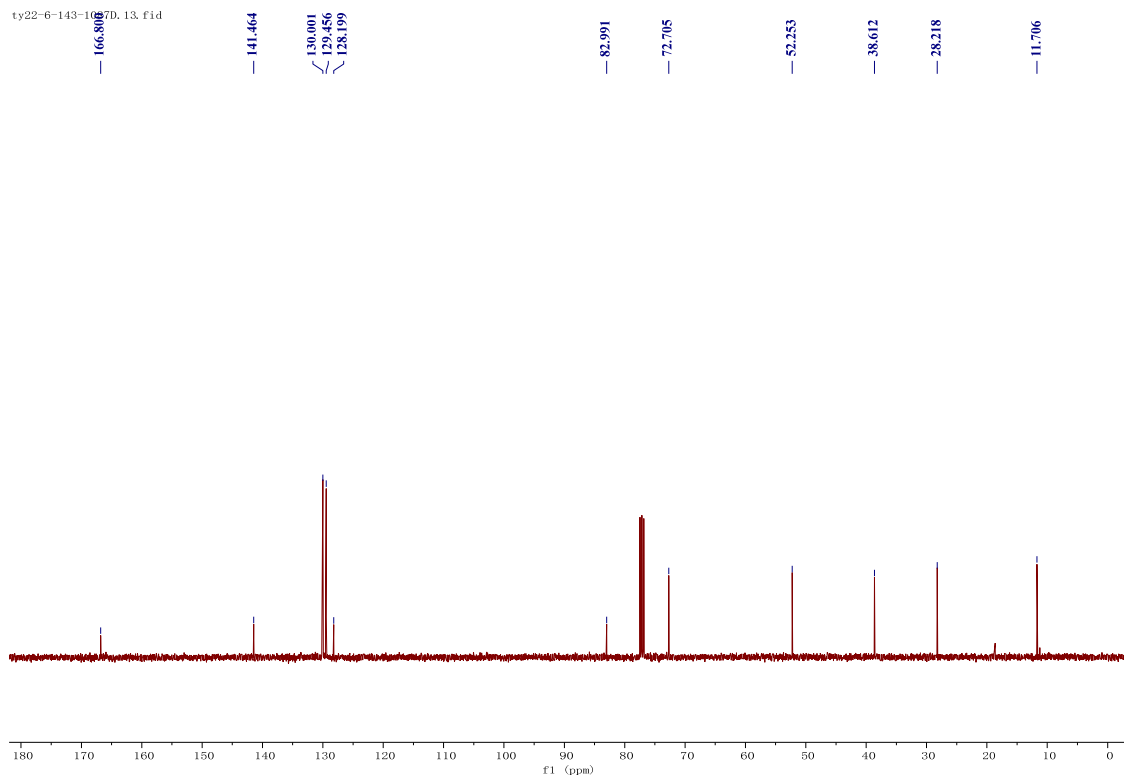

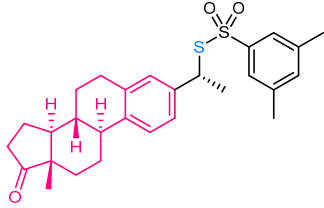

101

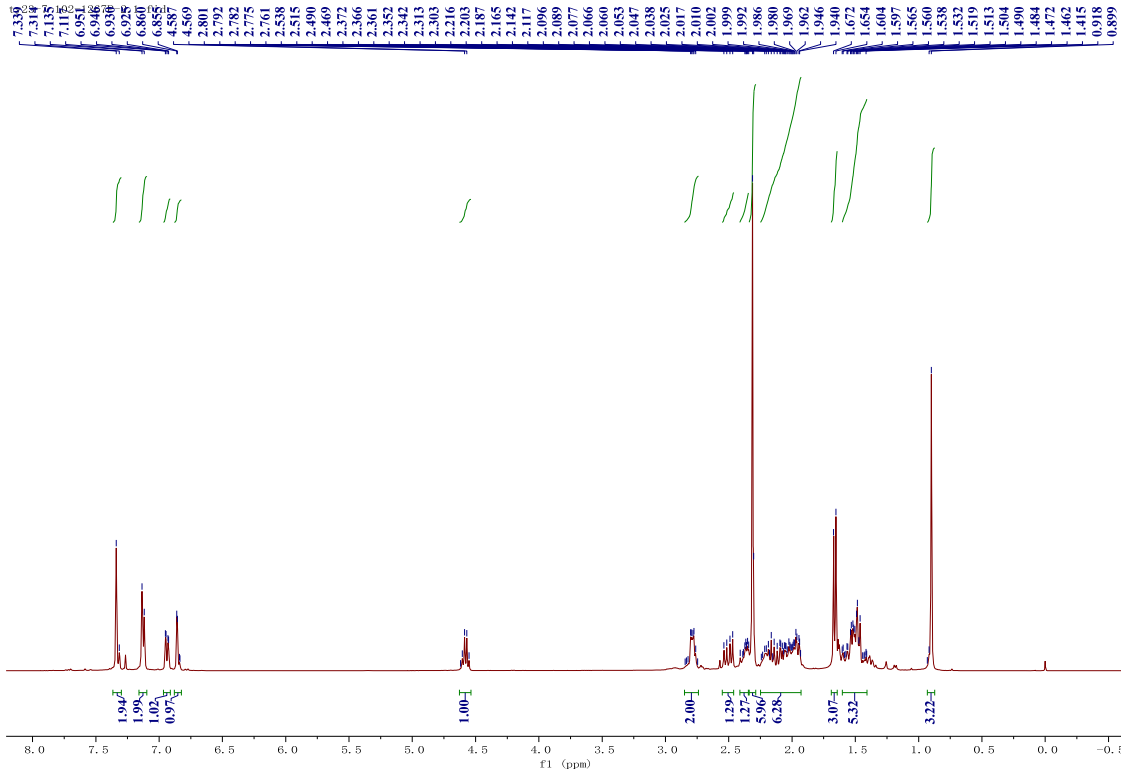

ty23-7-102-1267-2.13.fid

144.967  
139.404  
138.955  
137.822  
136.777  
134.851  
127.801  
125.614  
124.477  
124.402  
124.395

50.612  
50.515  
47.951  
44.394  
38.054  
35.875  
31.604  
29.303  
26.466  
25.637  
22.780  
21.616  
21.286  
13.876

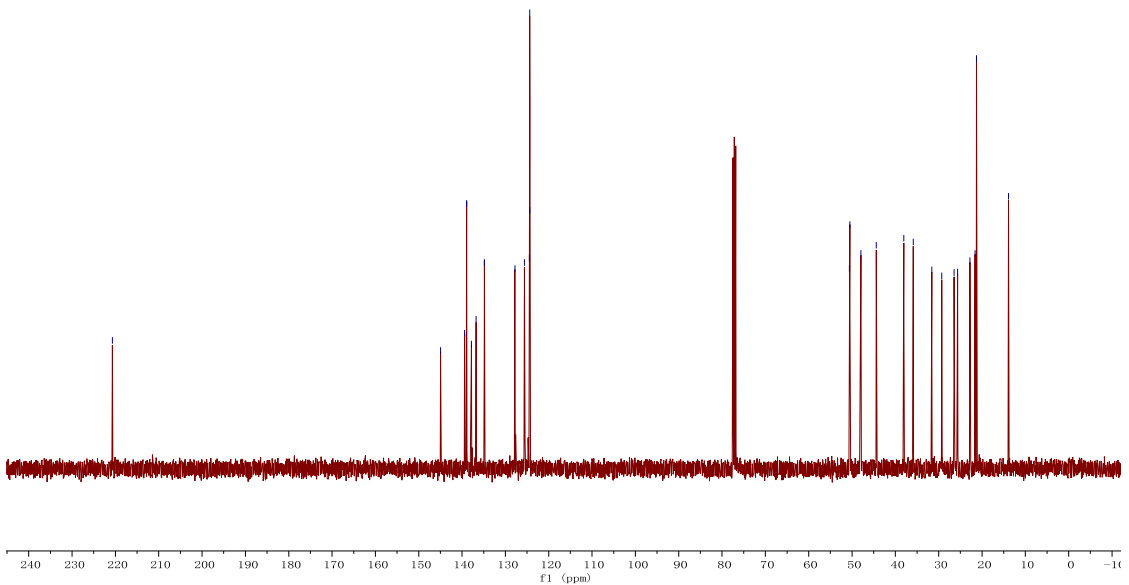

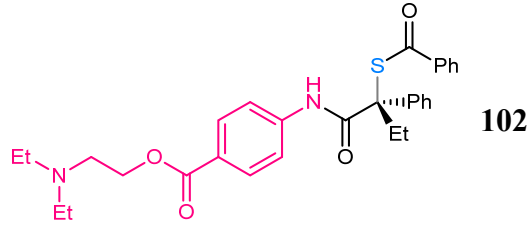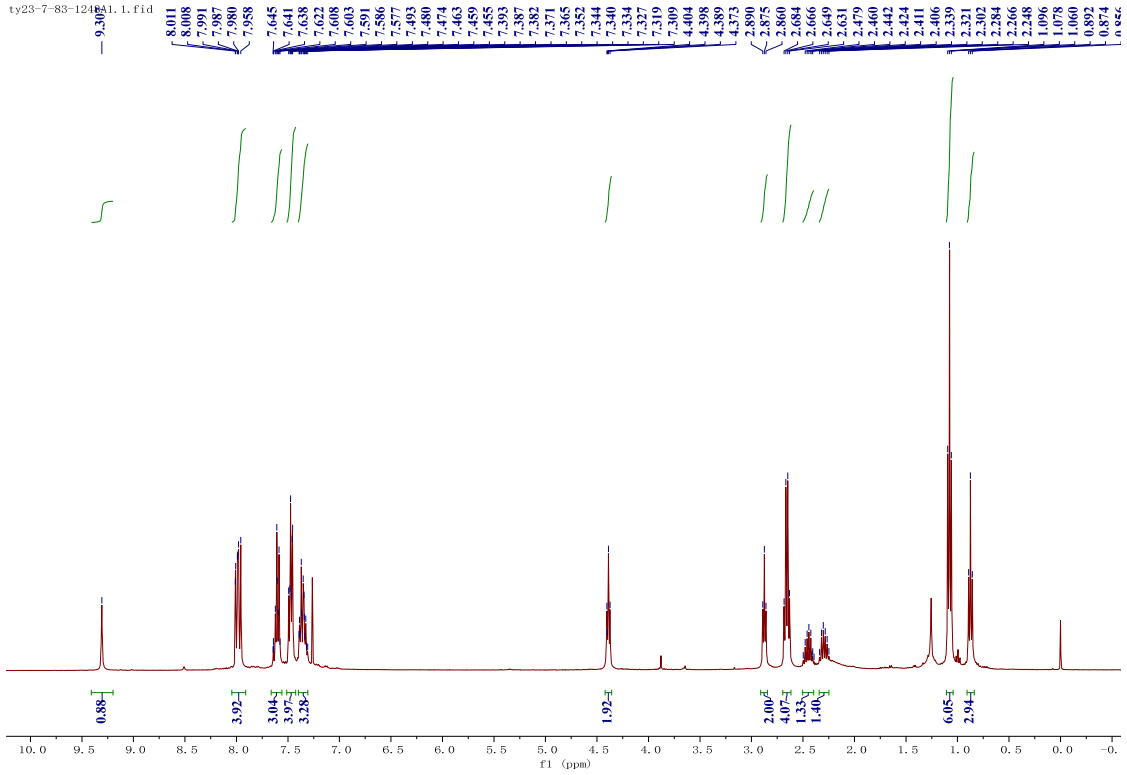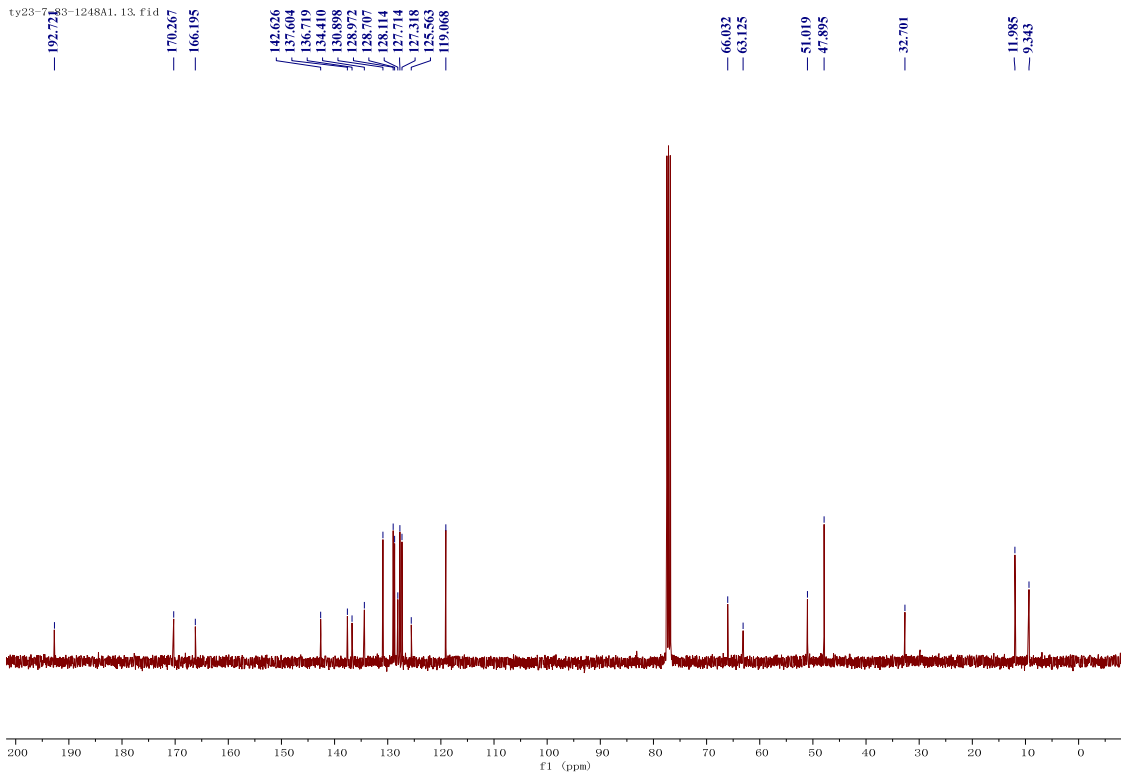

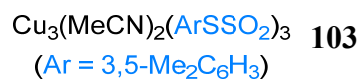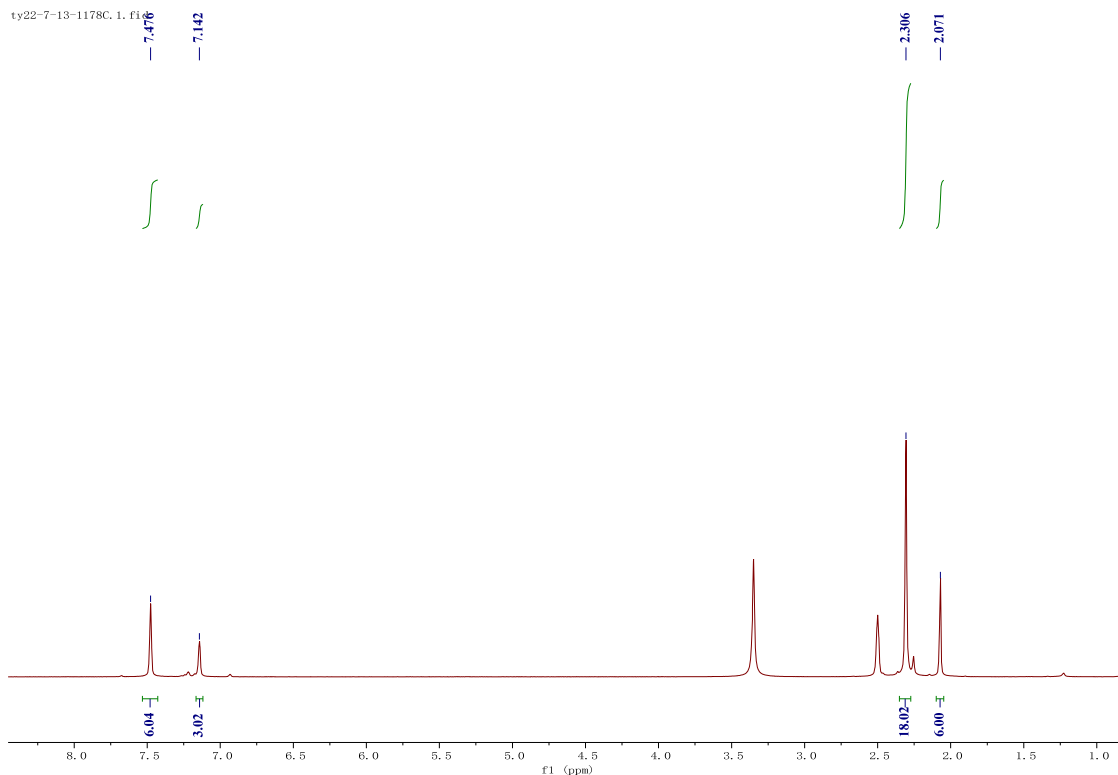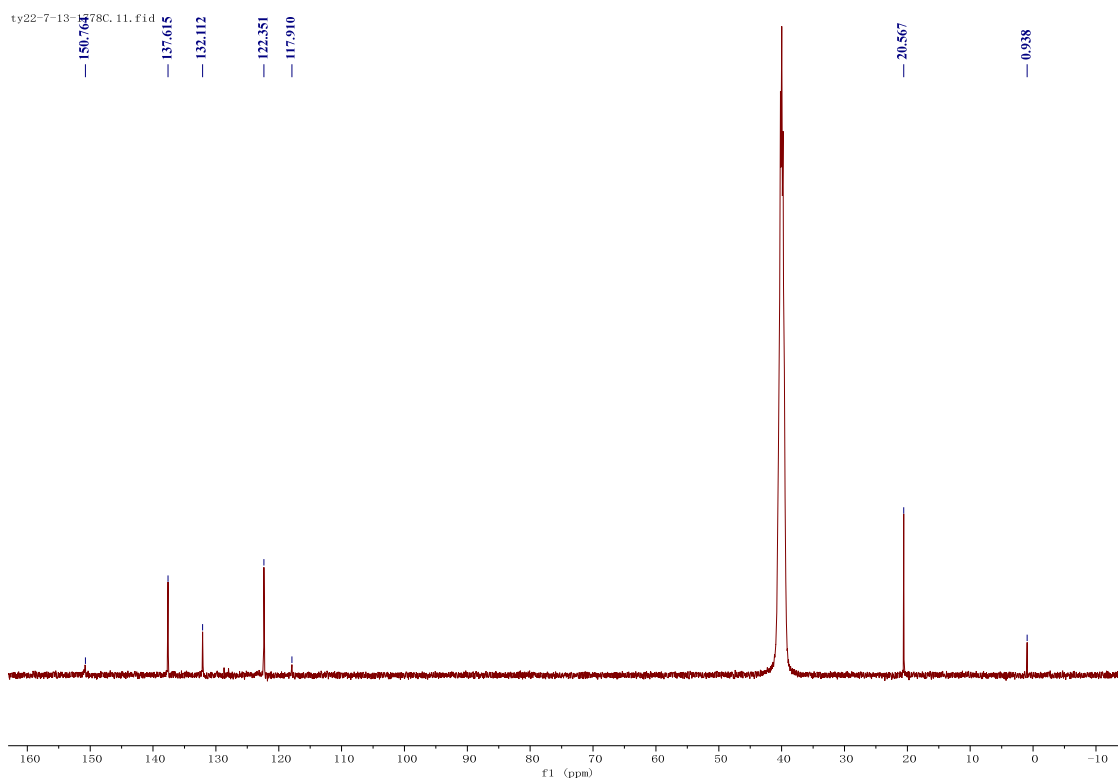

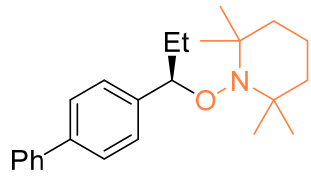

104

ty22-7-15

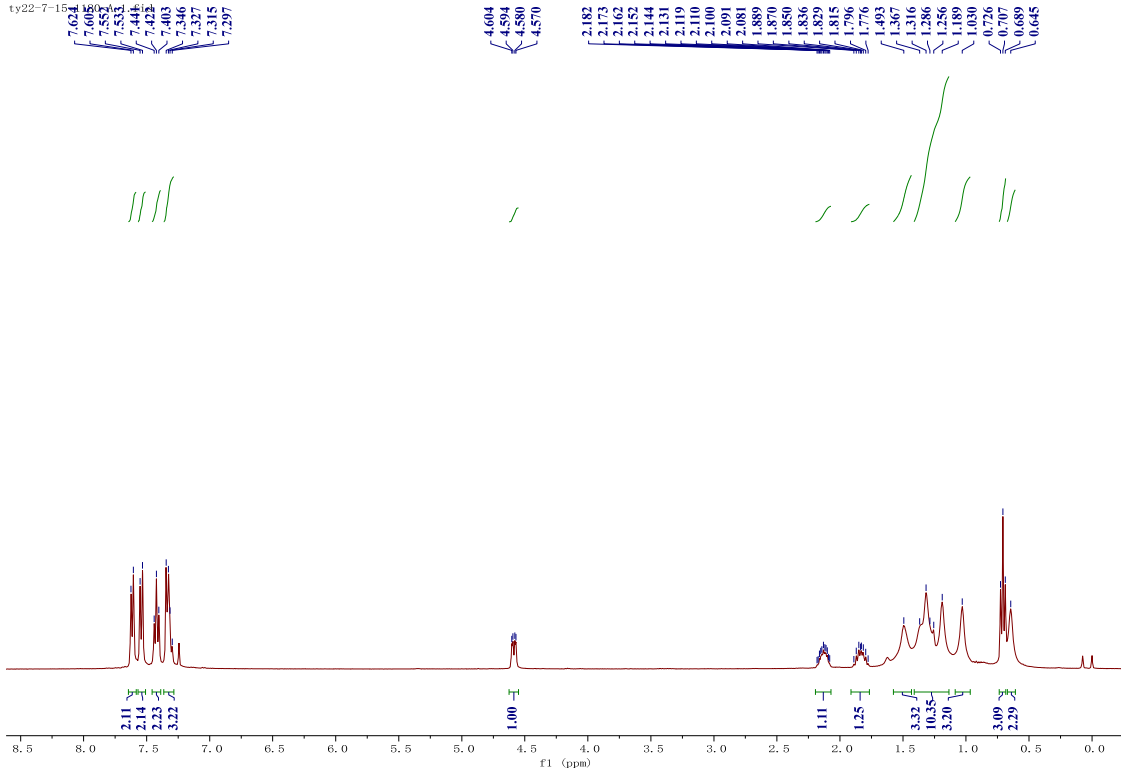

ty22-7-15-1180-A.13

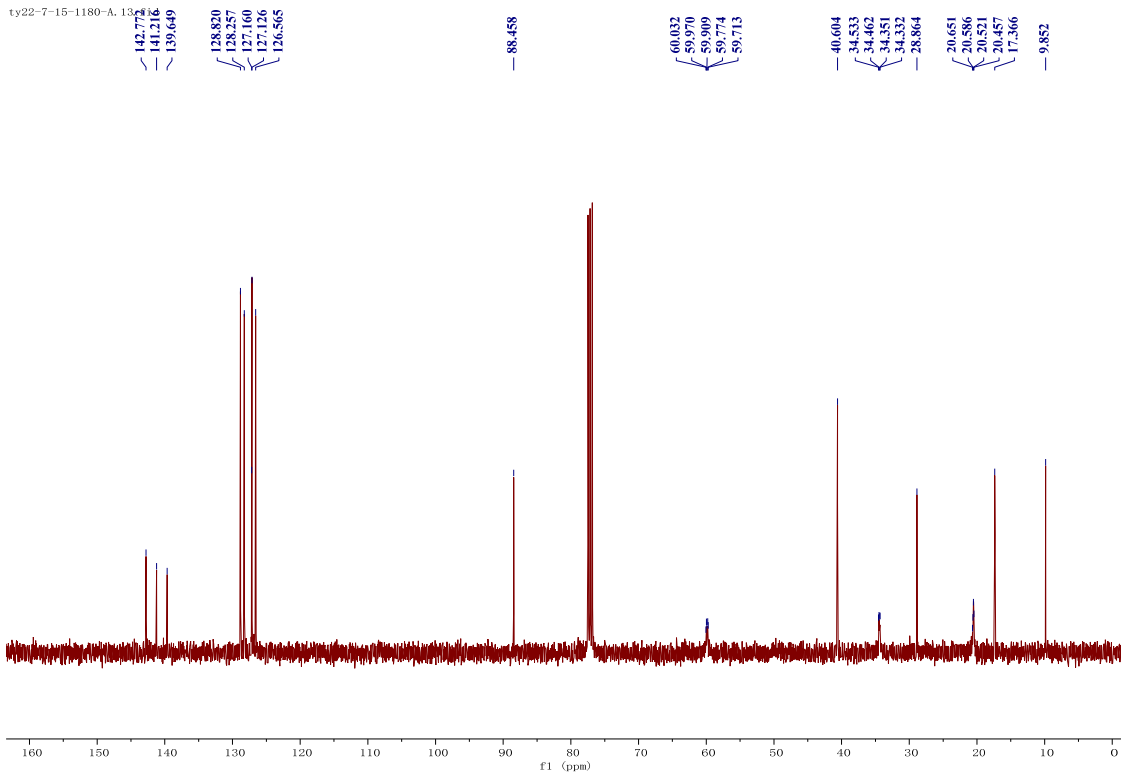

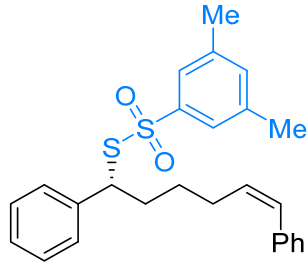

105

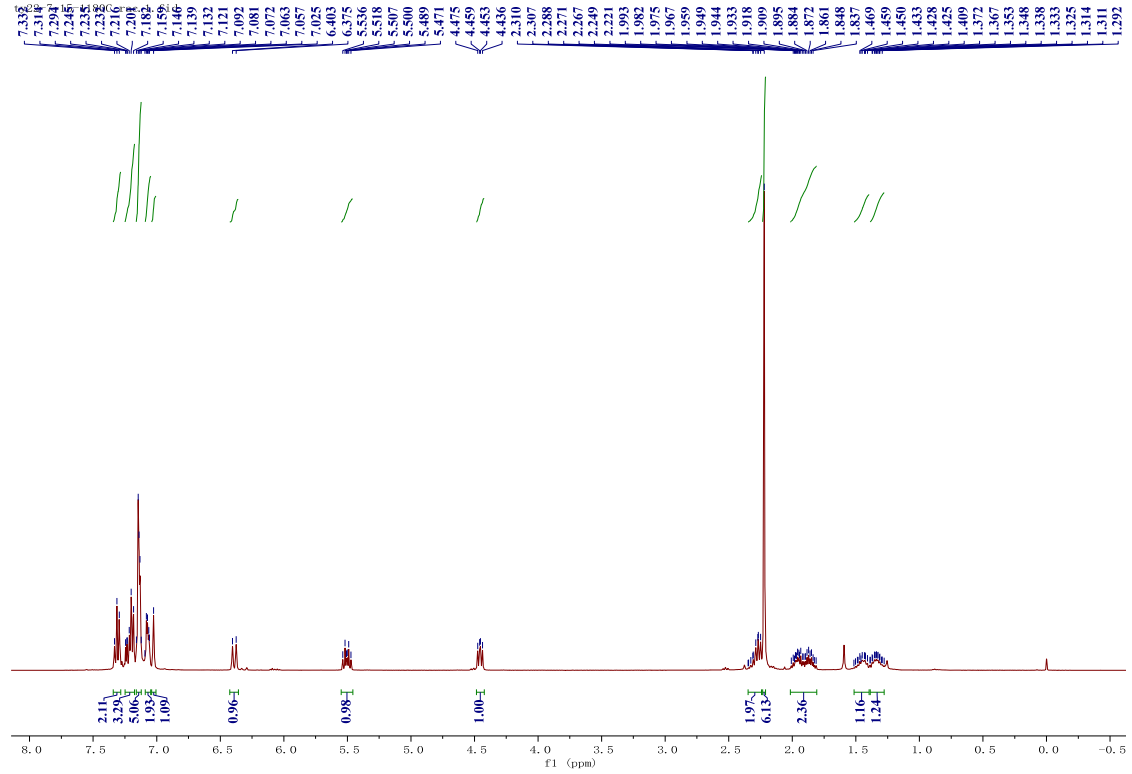

ty22-7-15-1180C

145.106  
139.513  
138.889  
137.486  
134.838  
131.783  
129.632  
128.789  
128.432  
128.270  
127.777  
124.288

55.933

36.031

28.002

27.567

21.205

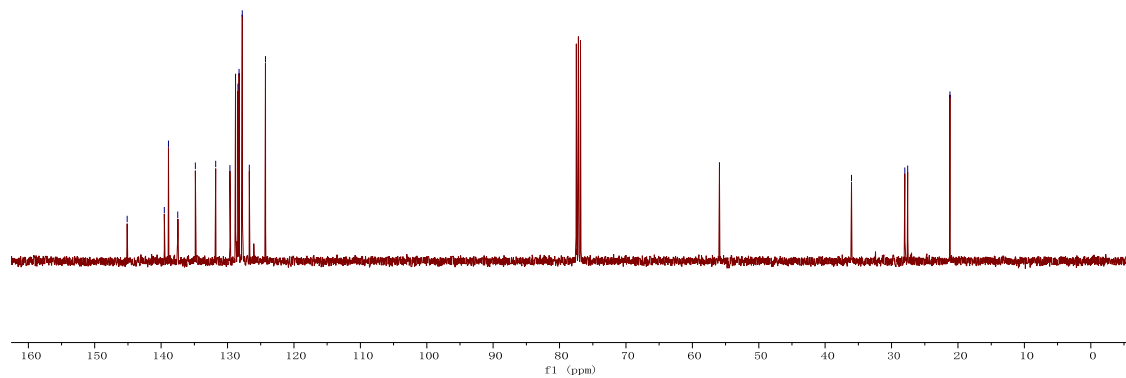

S374





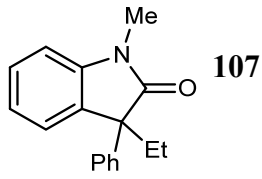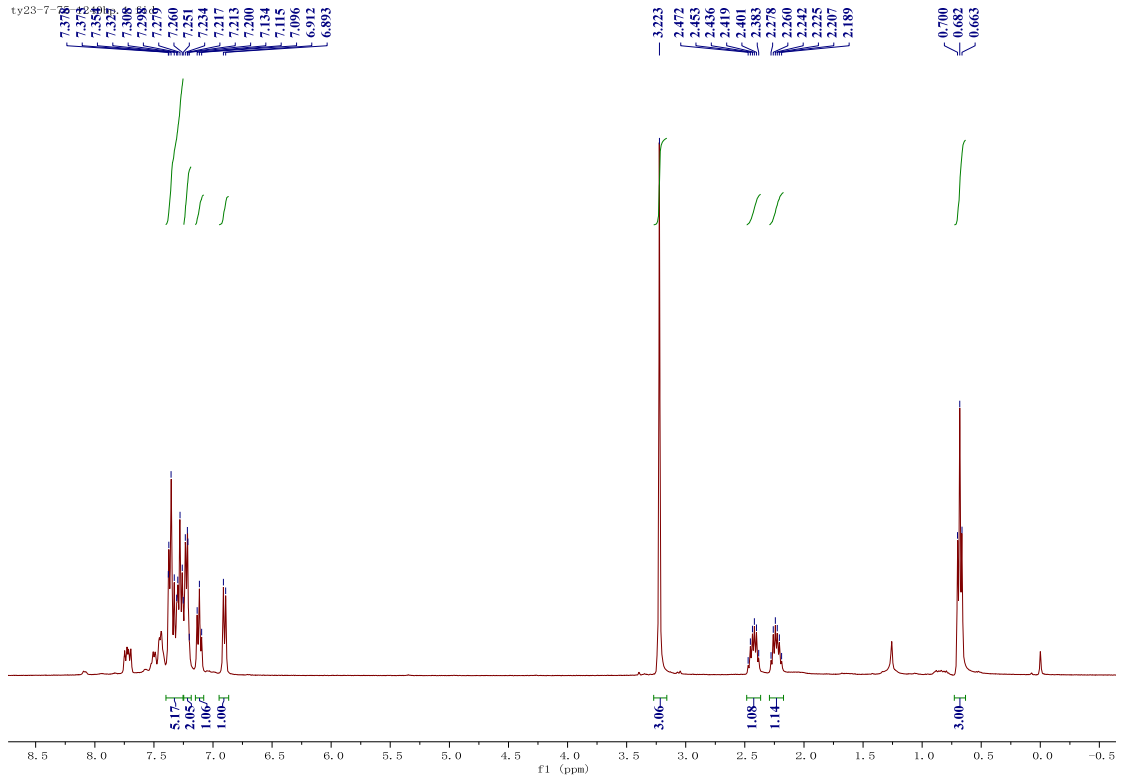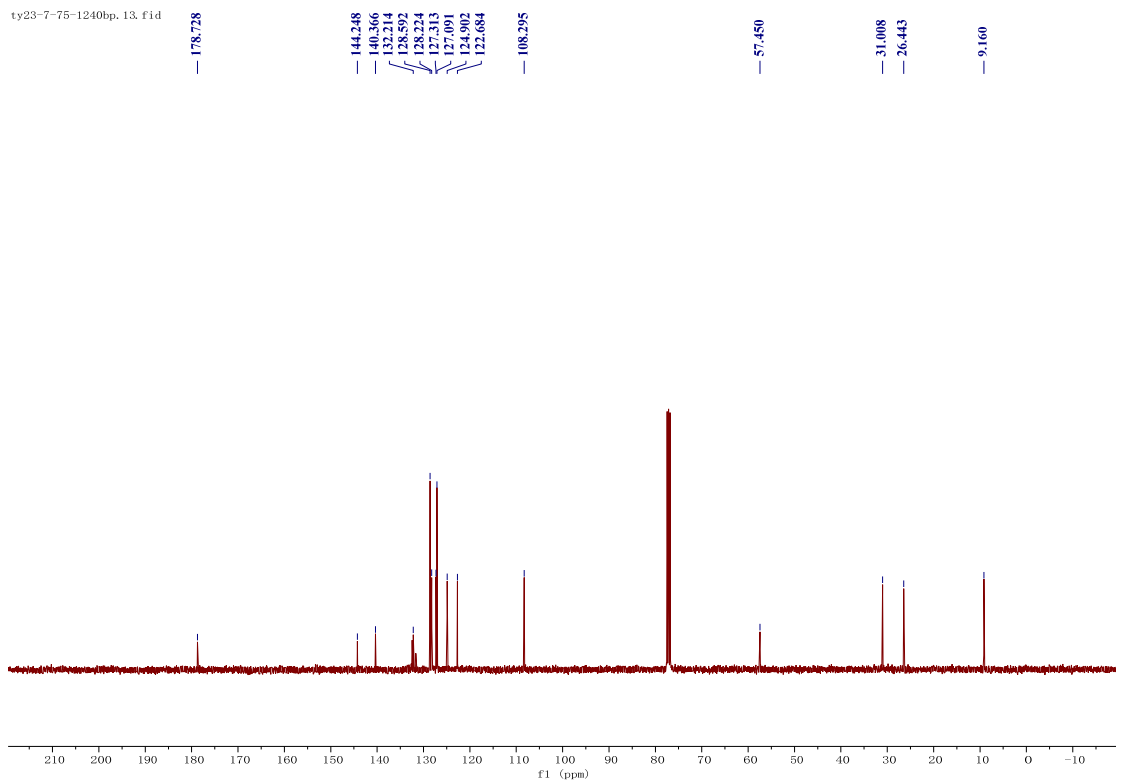

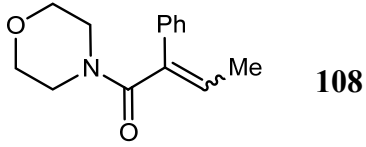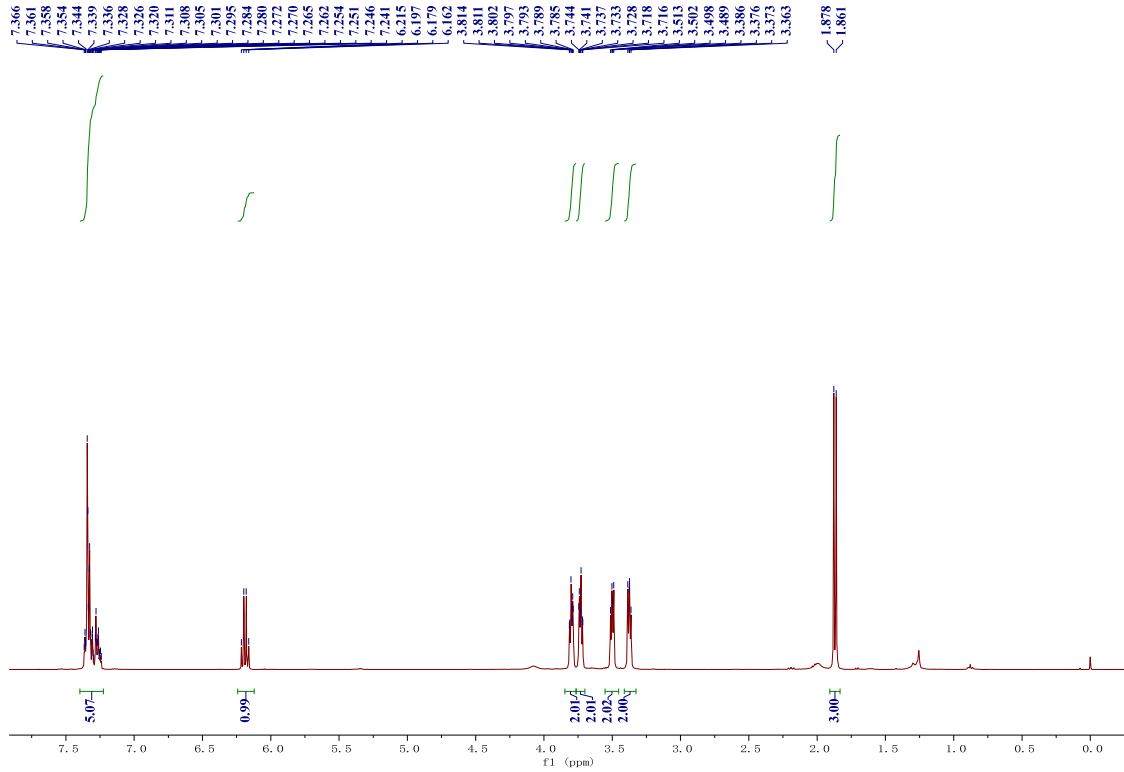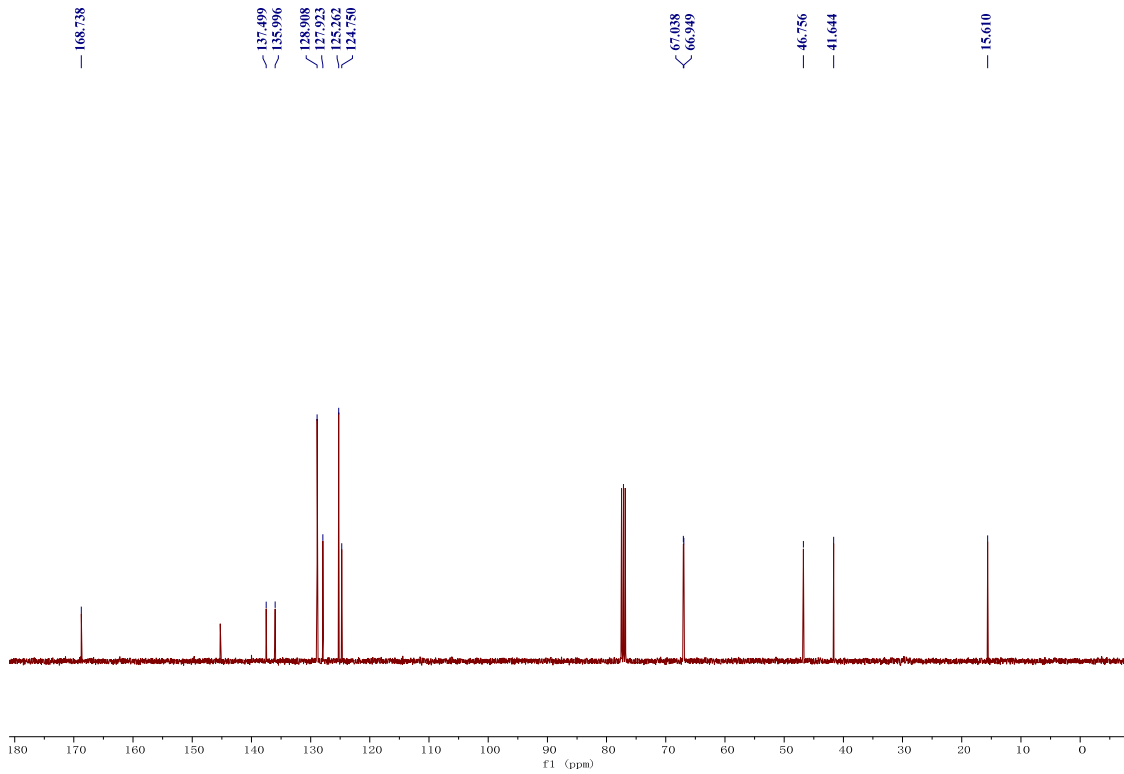

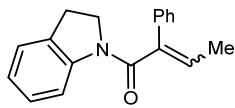

109

mixture: 4:1

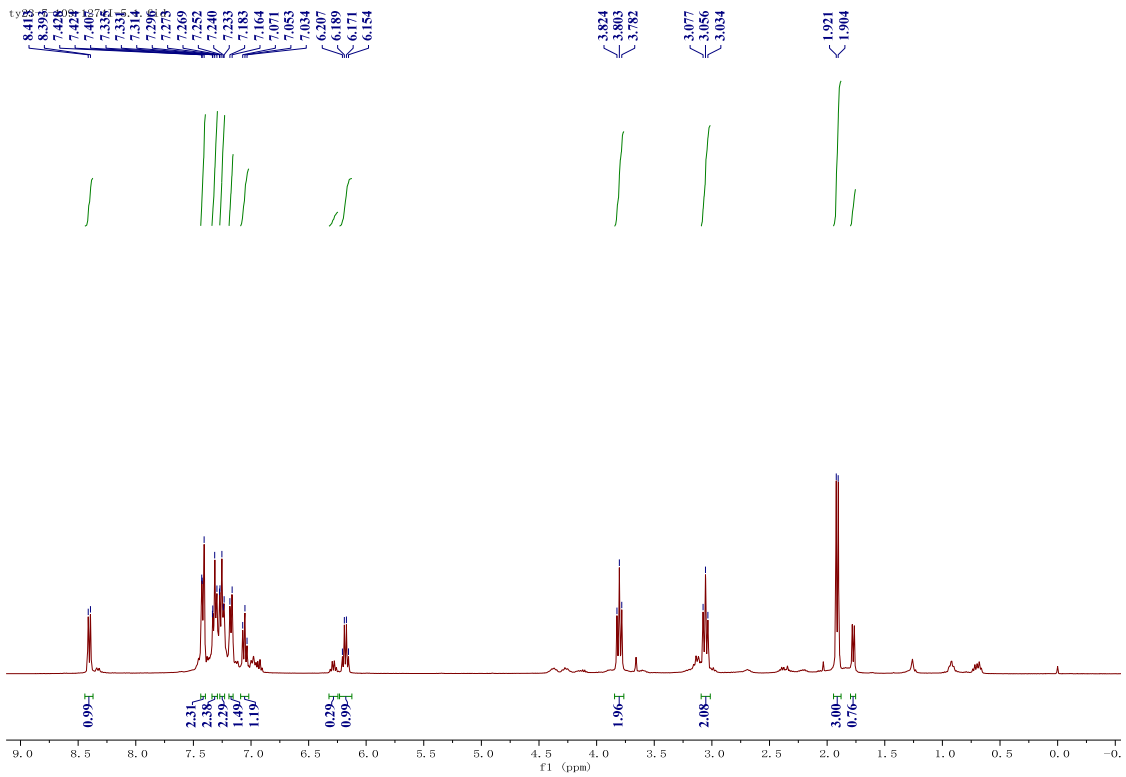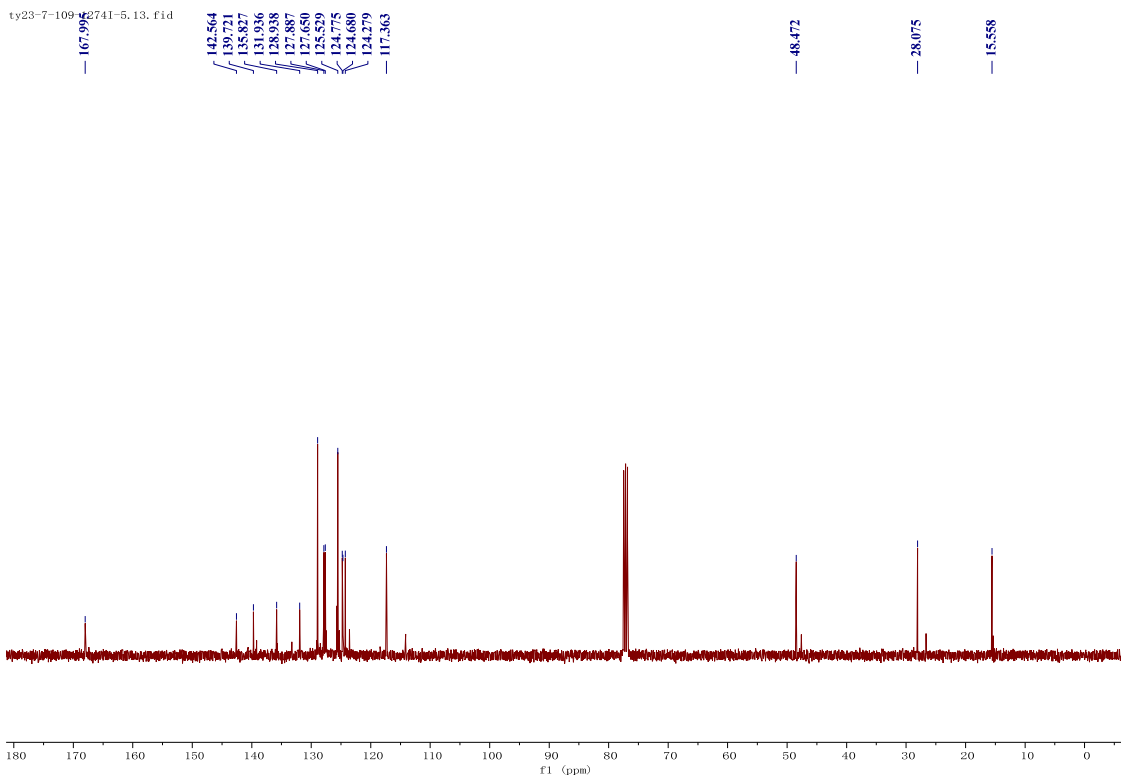

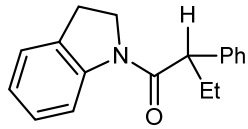

110

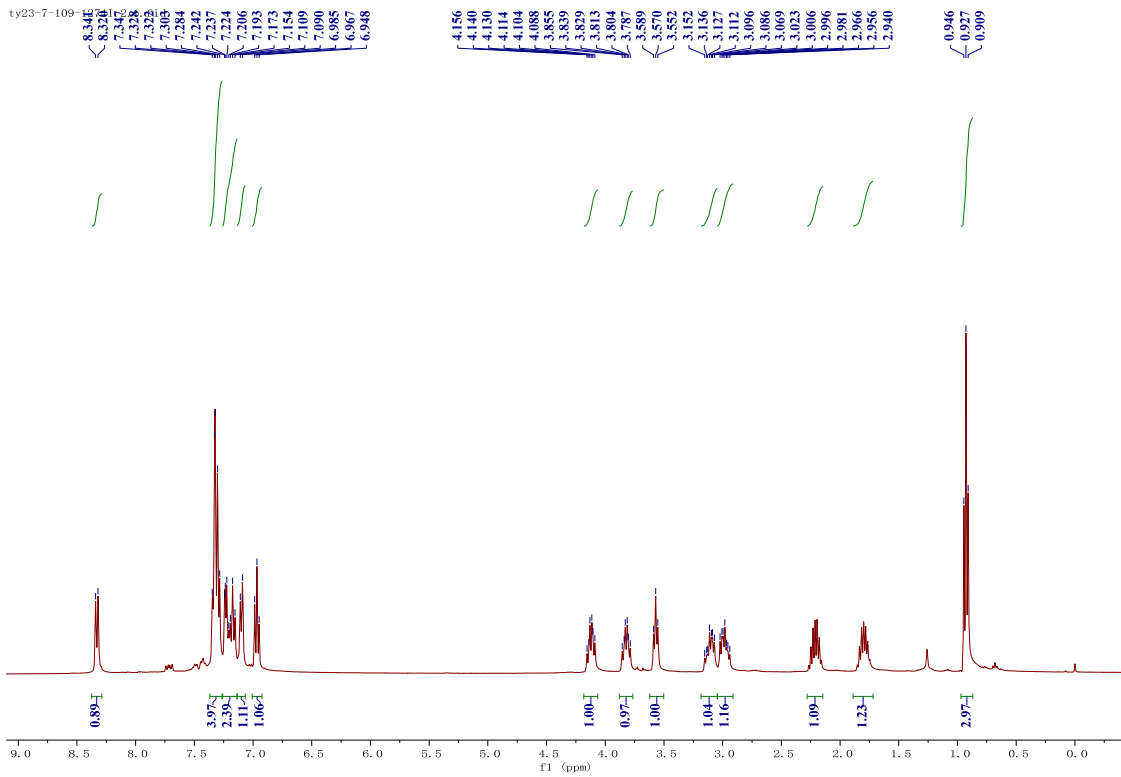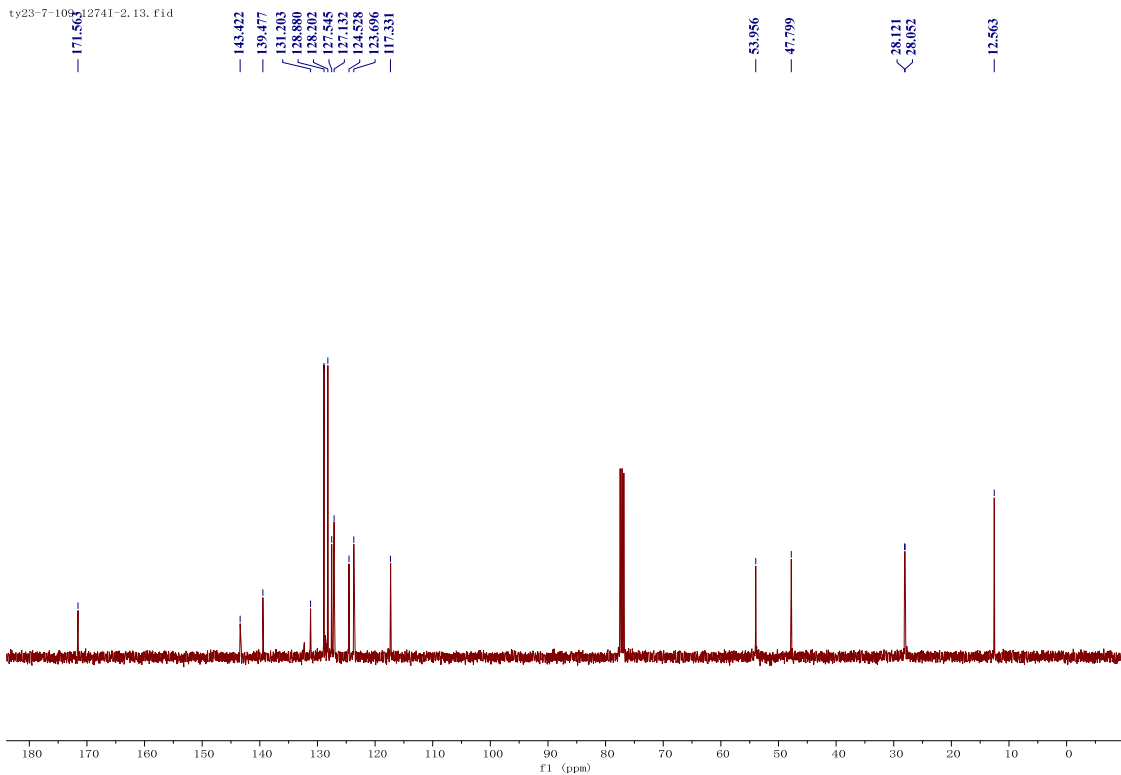

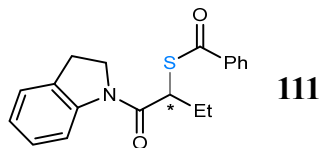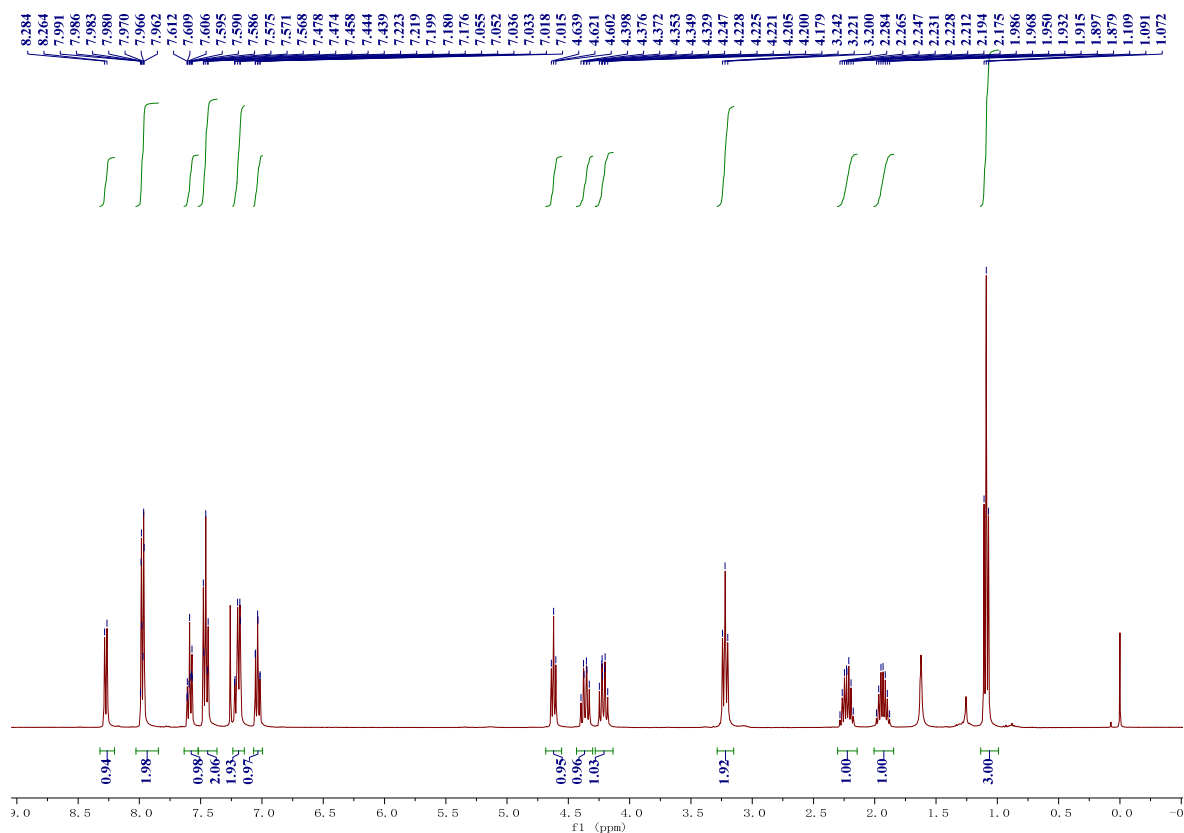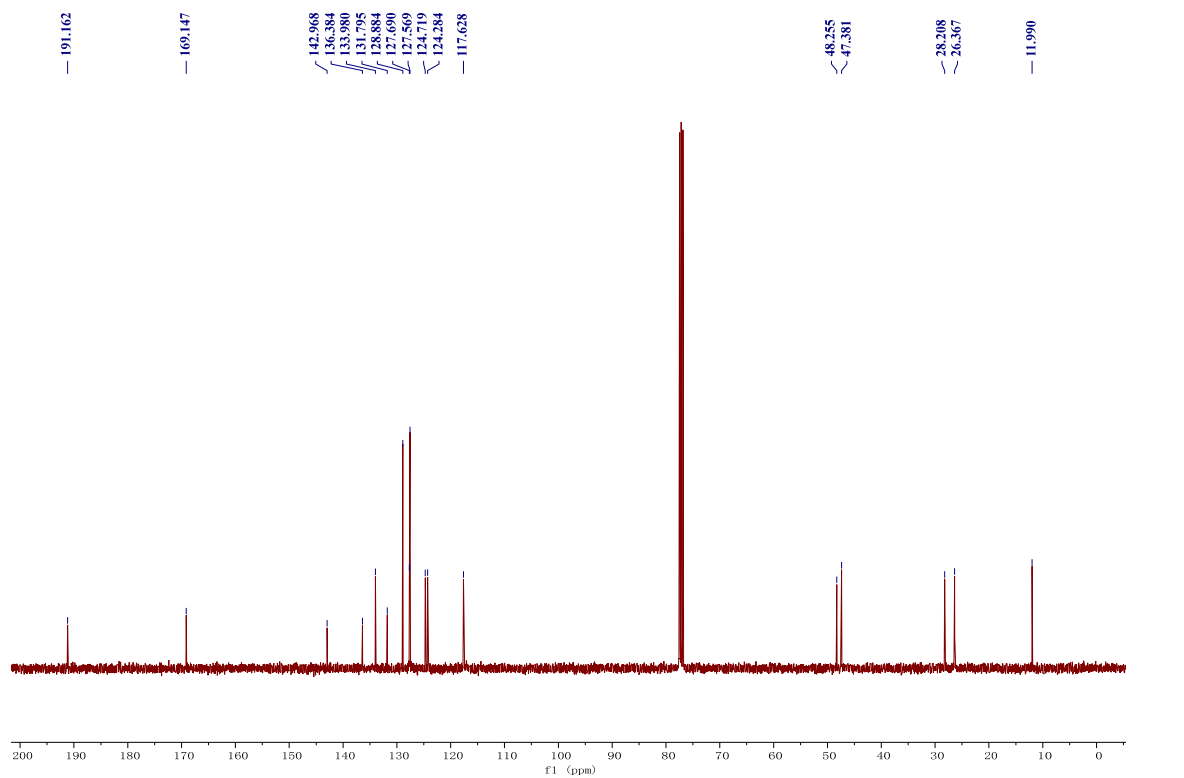

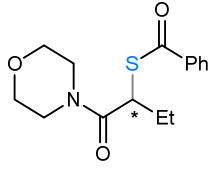

112

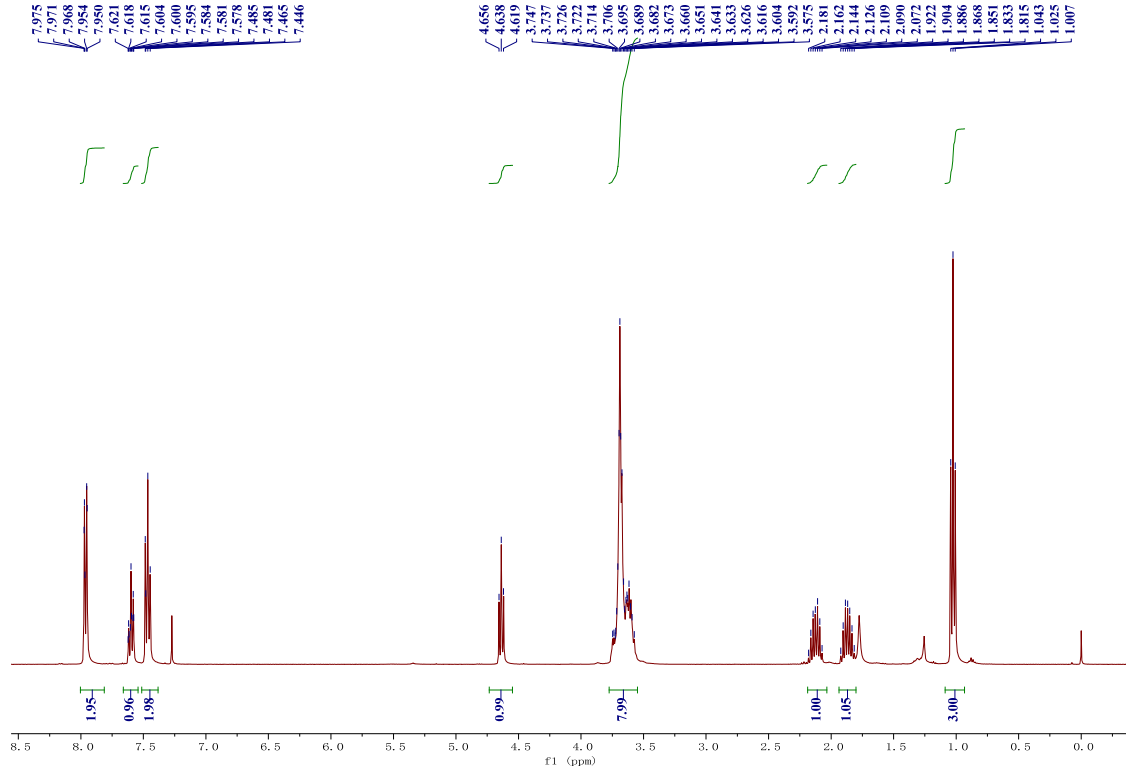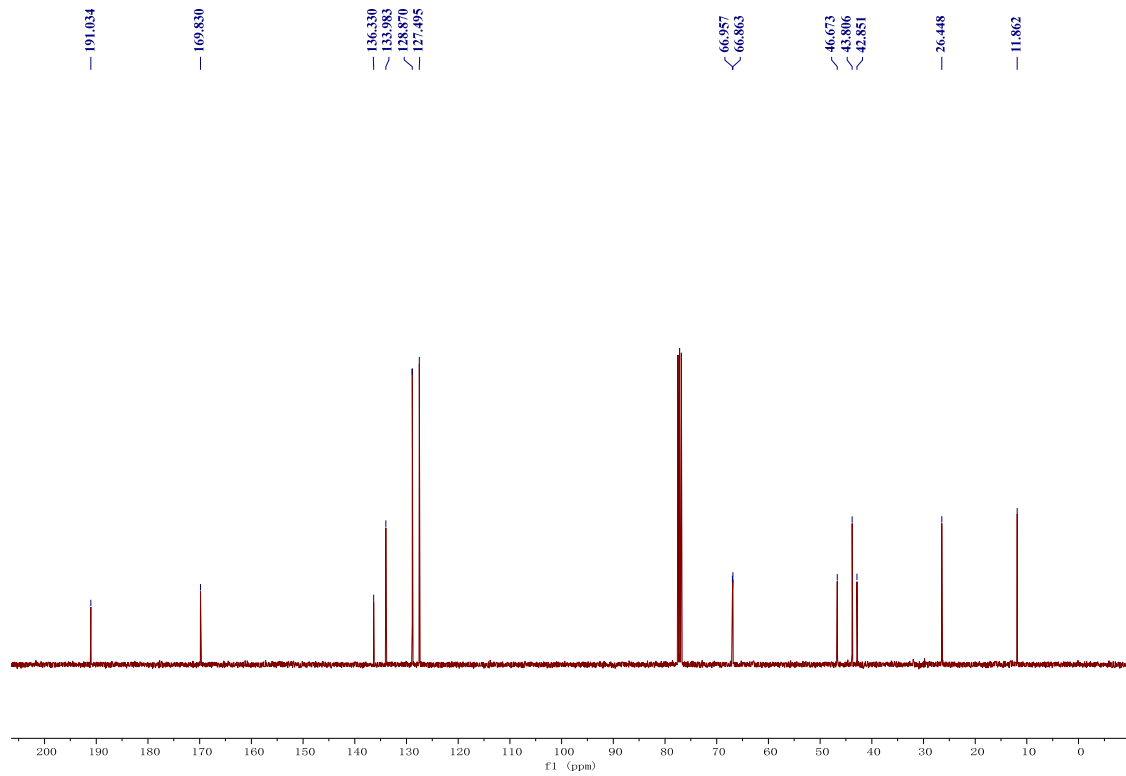

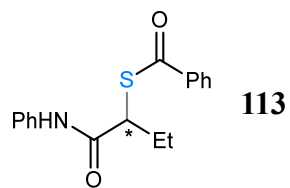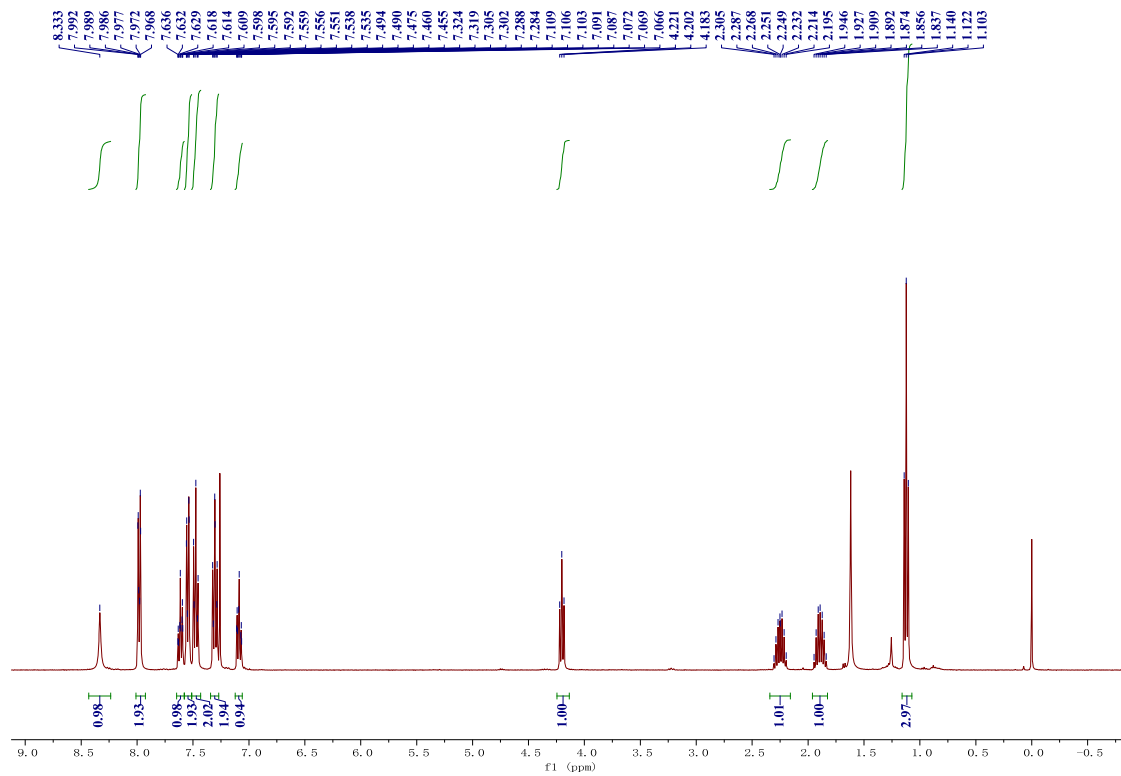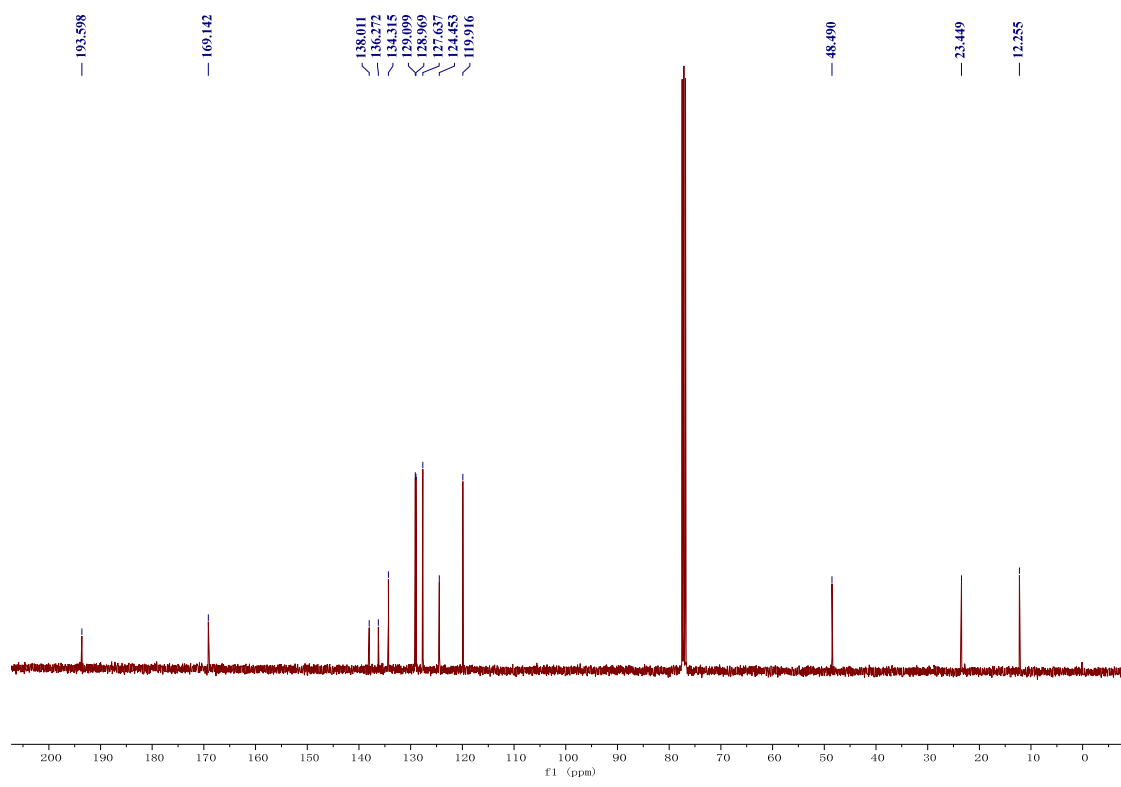

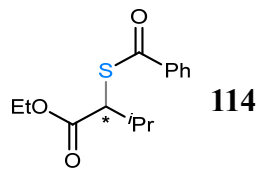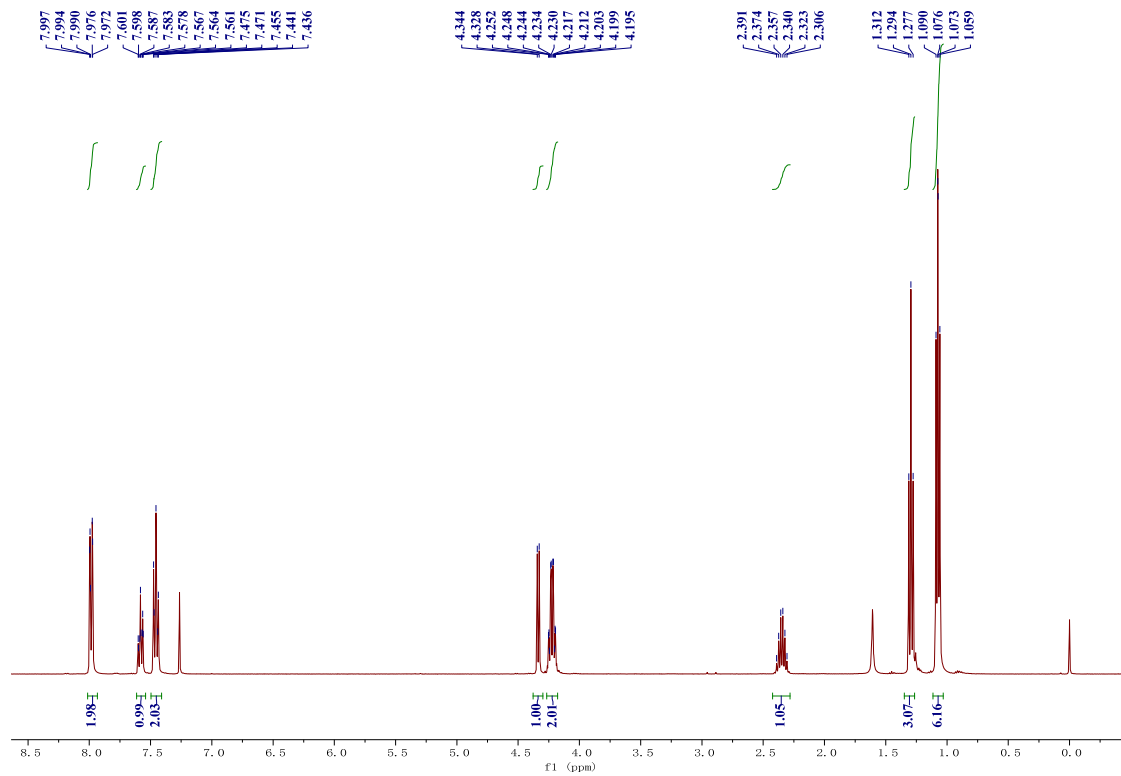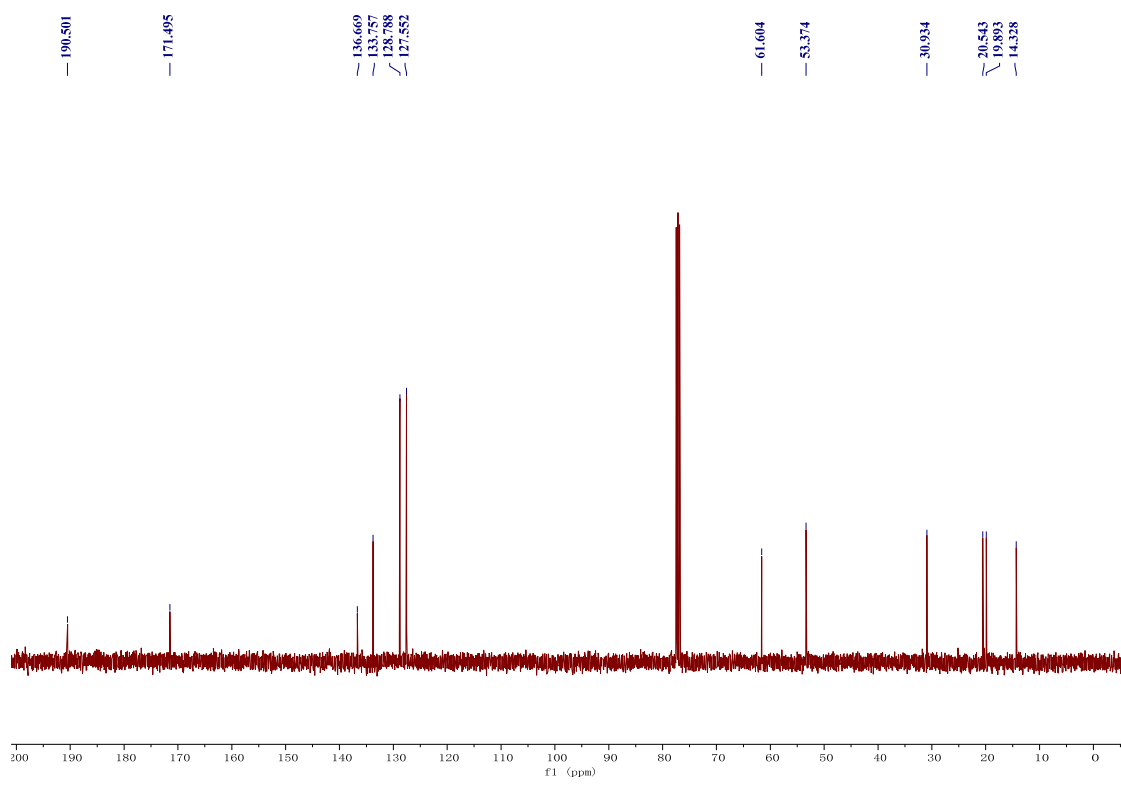



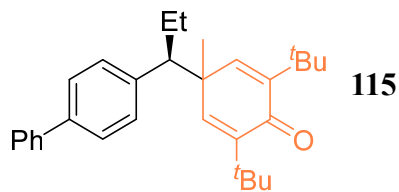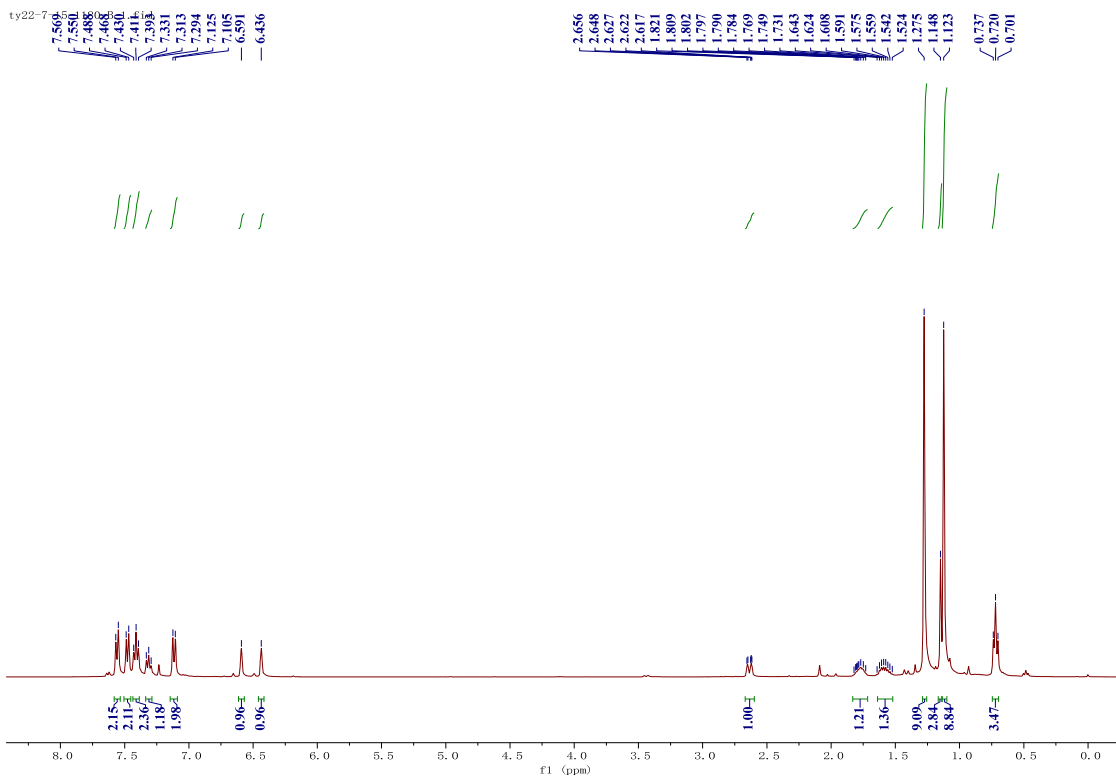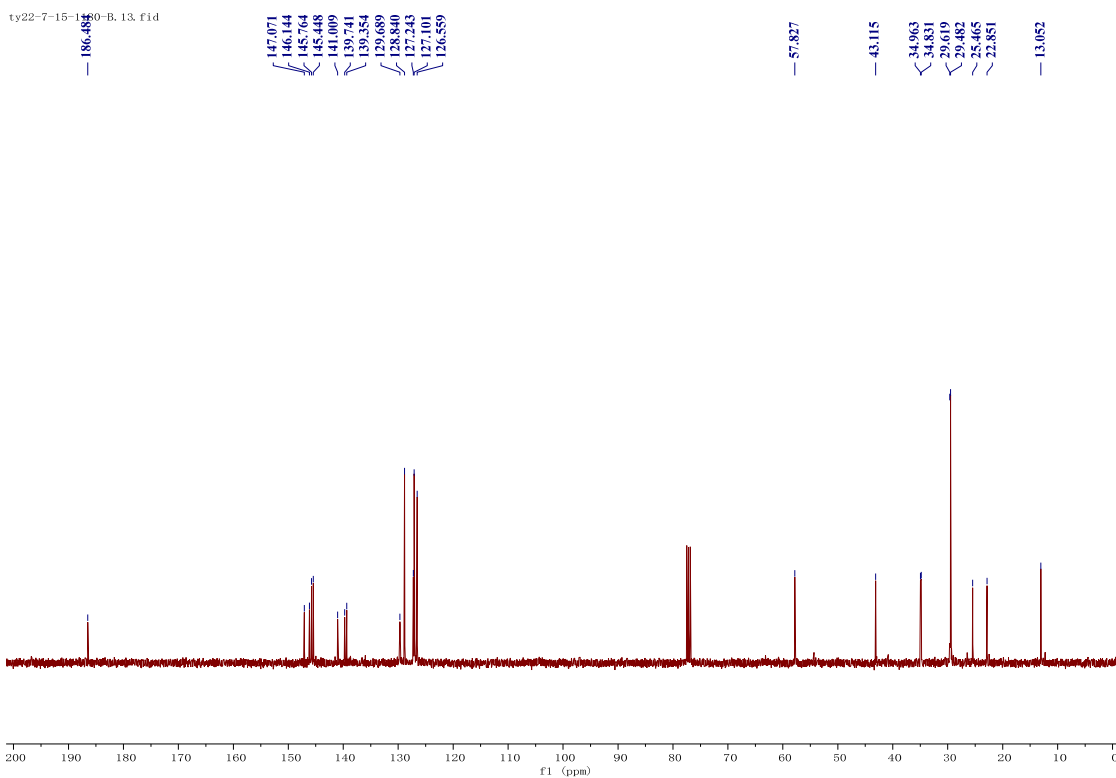

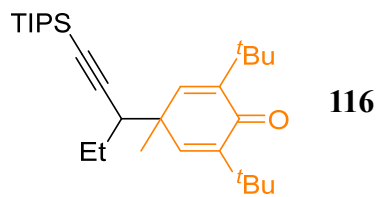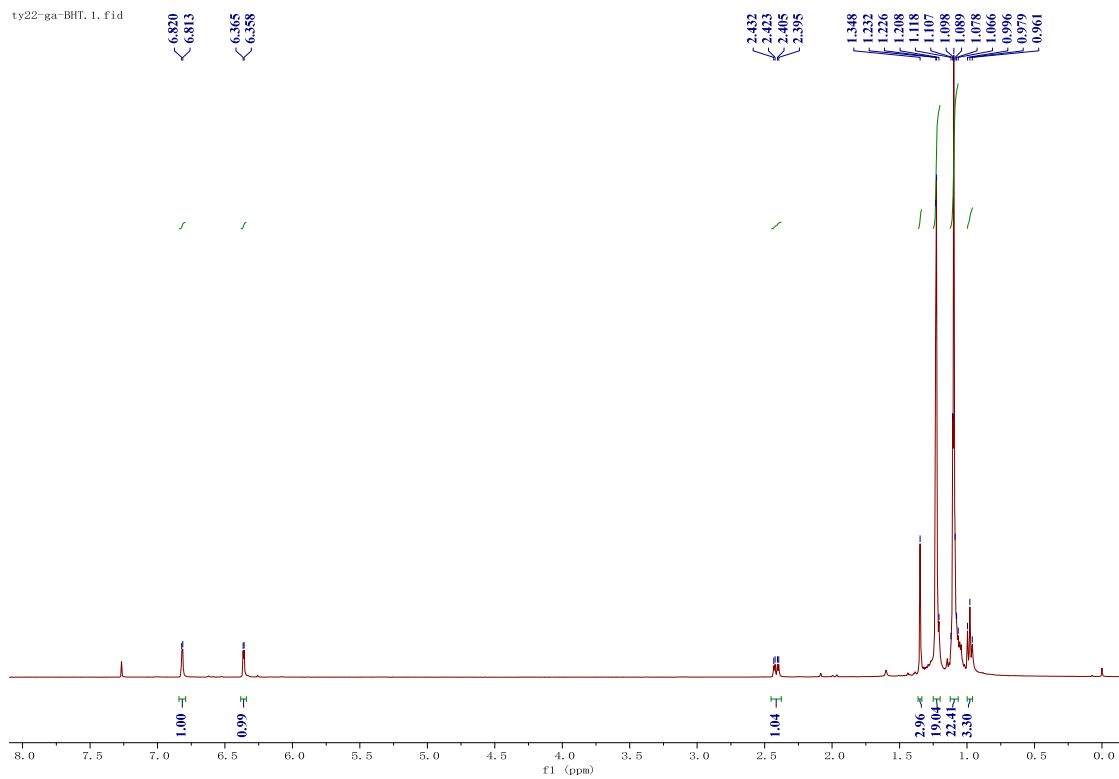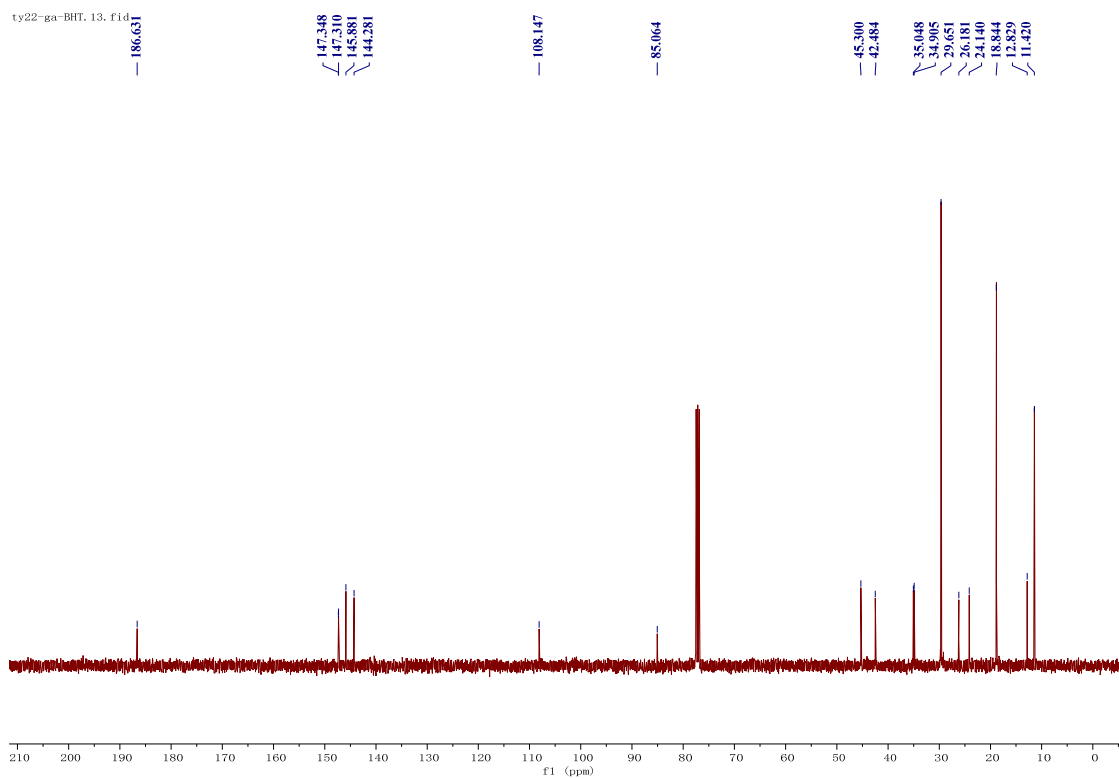

PhC(O)SCu(PPh<sub>3</sub>)<sub>2</sub> 117

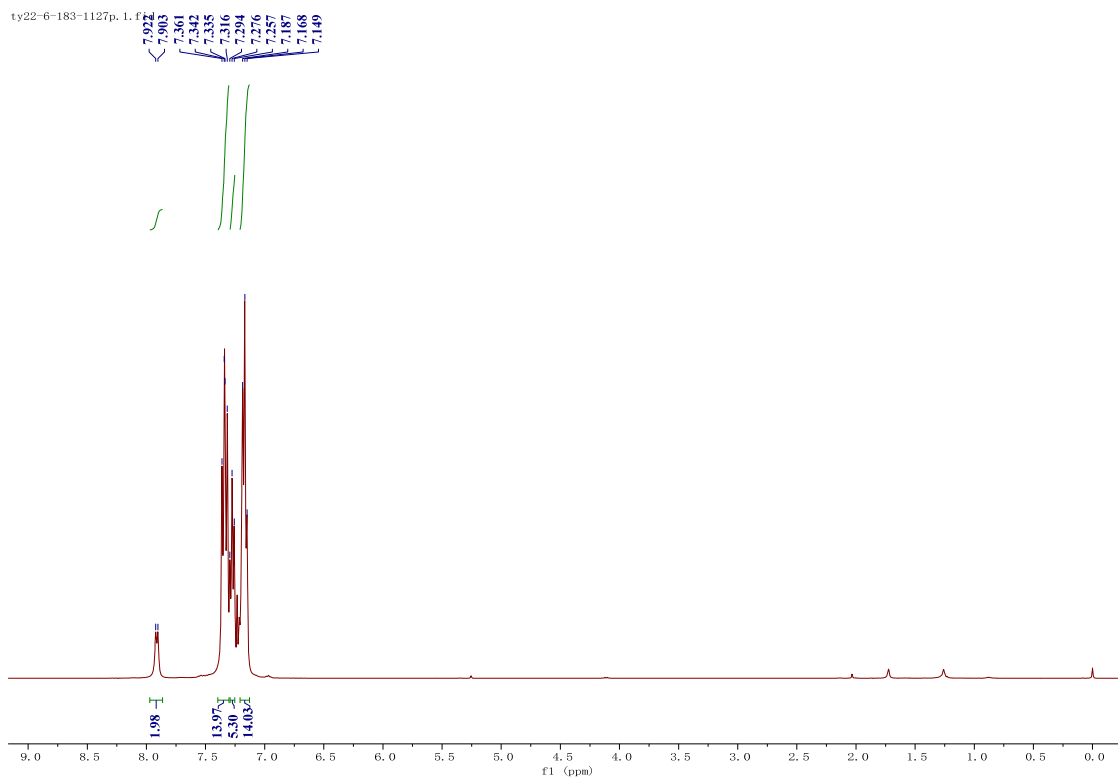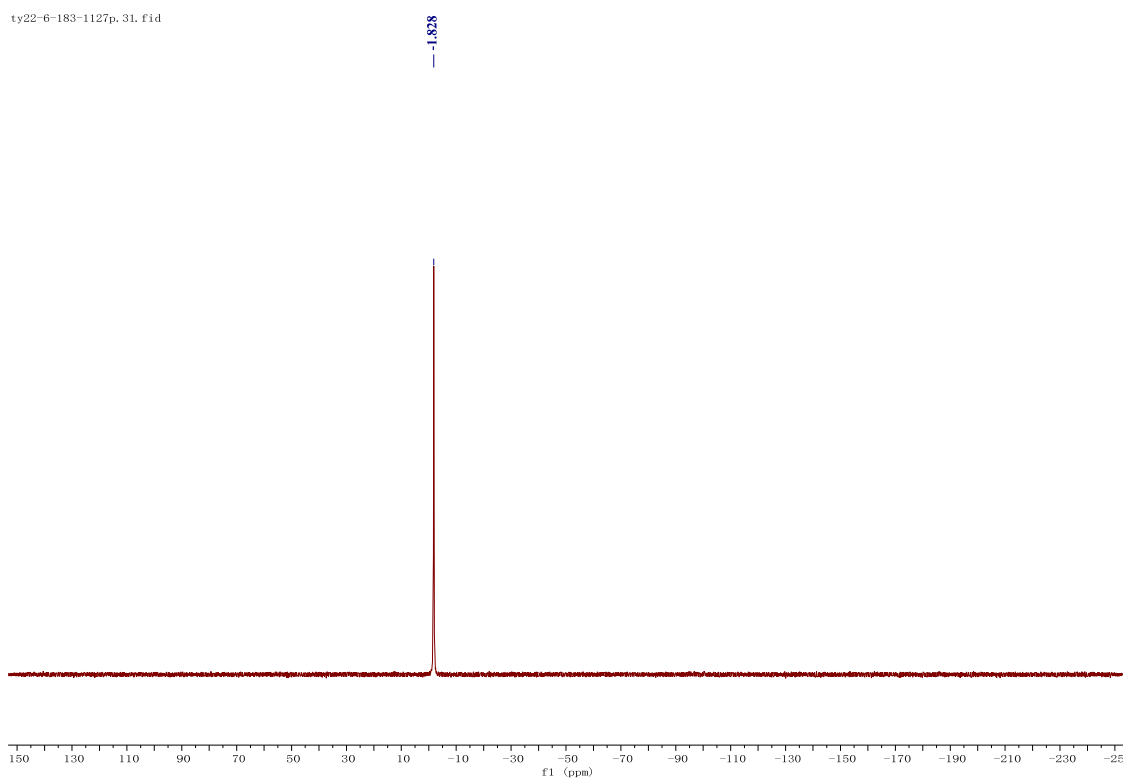

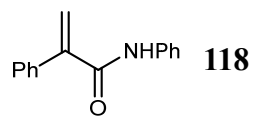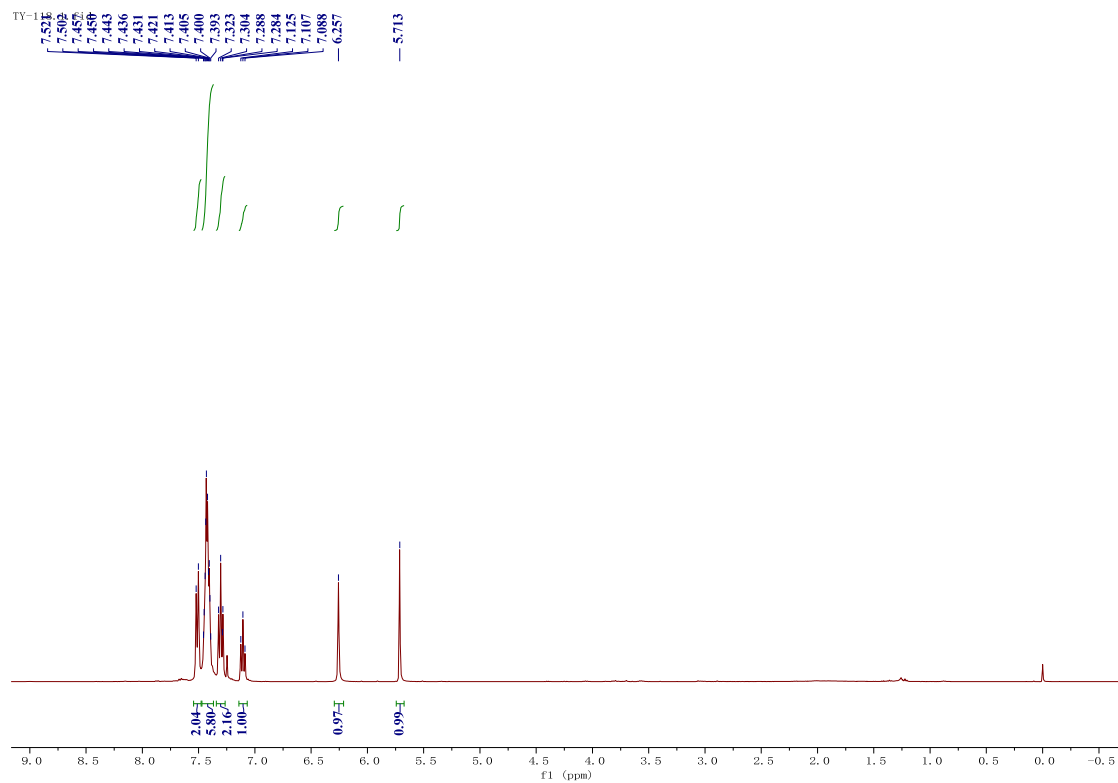

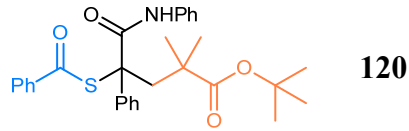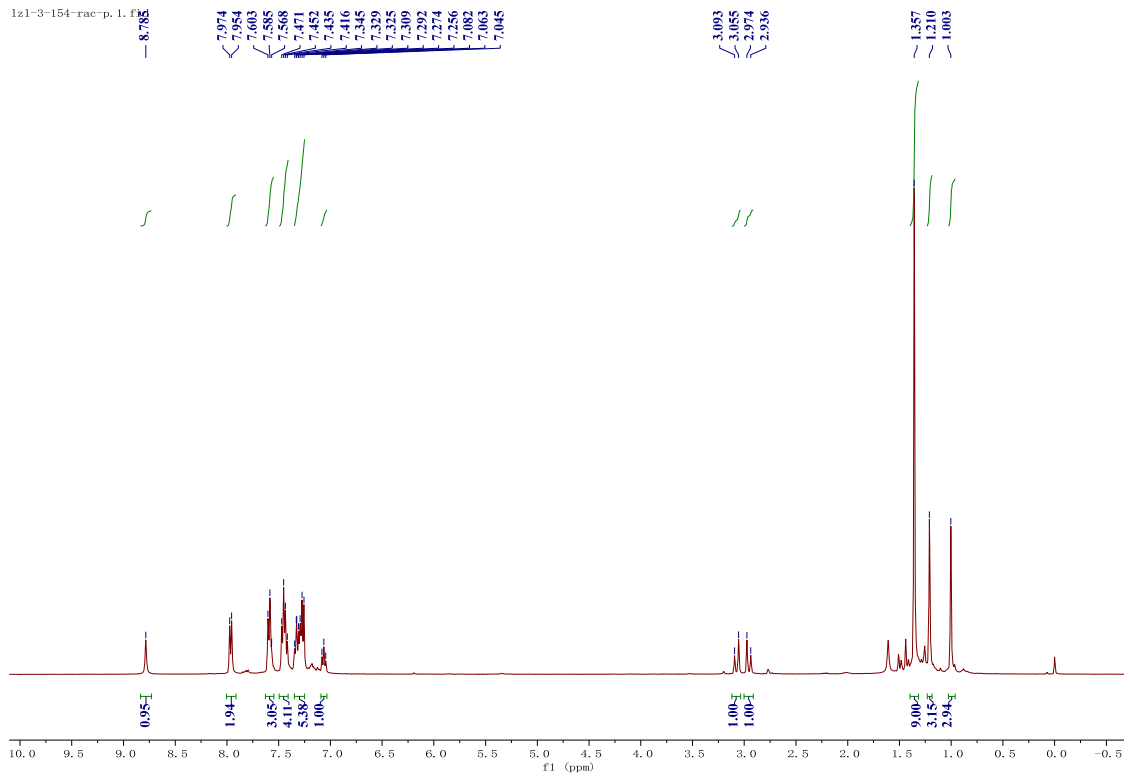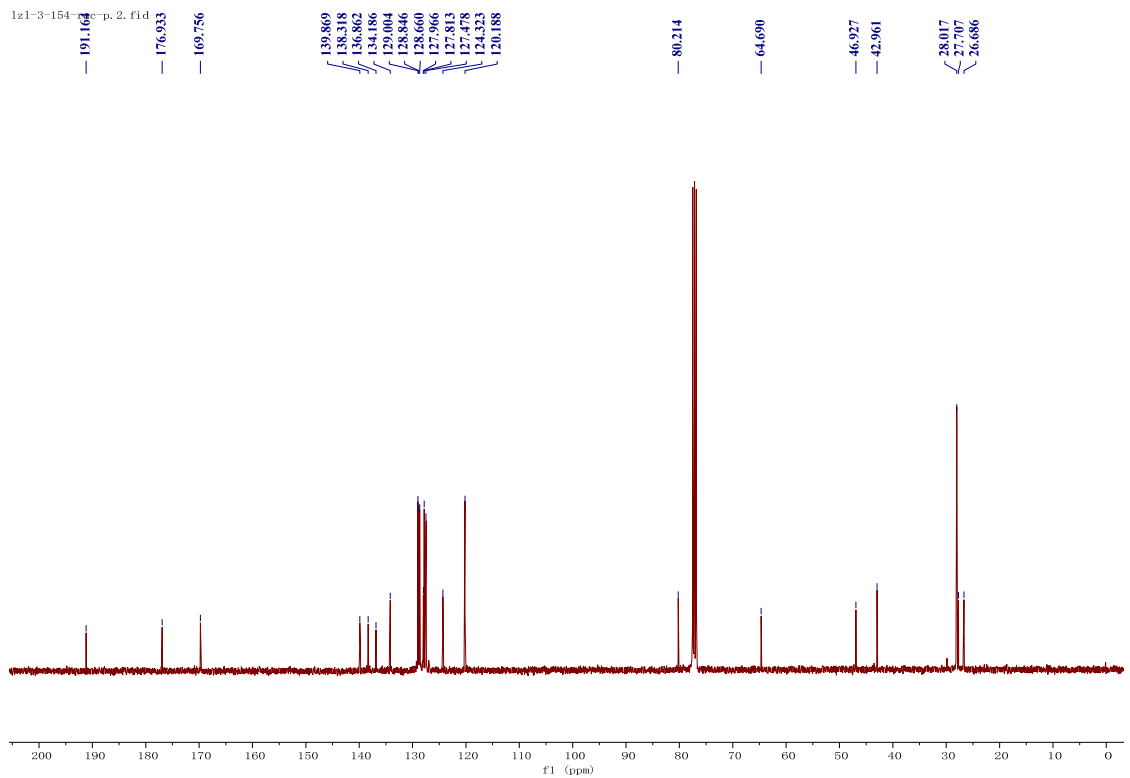

## 14. HPLC spectra

mAU

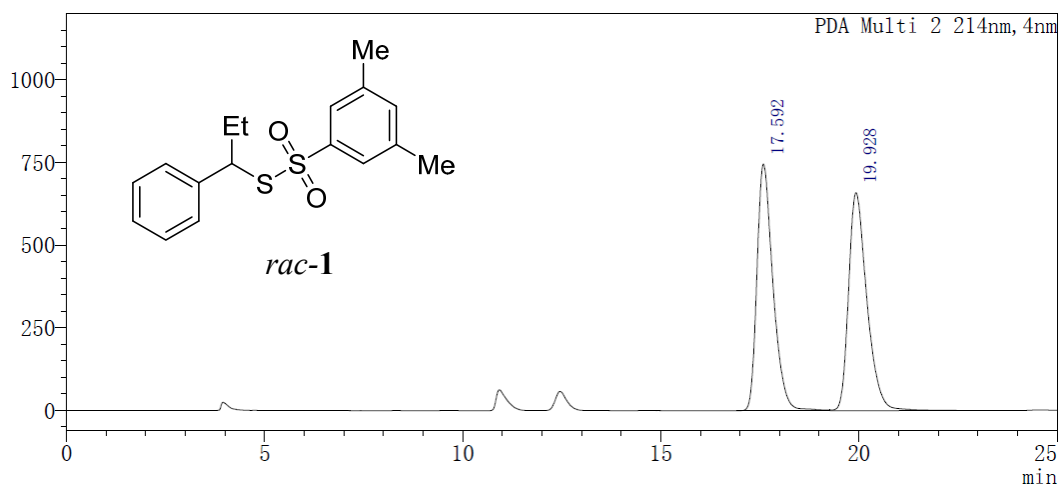

PDA Ch2 214nm

| T      | Hight  | Area     | Area%  |
|--------|--------|----------|--------|
| 17.592 | 745141 | 21013181 | 49.792 |
| 19.928 | 658842 | 21188391 | 50.208 |

mAU

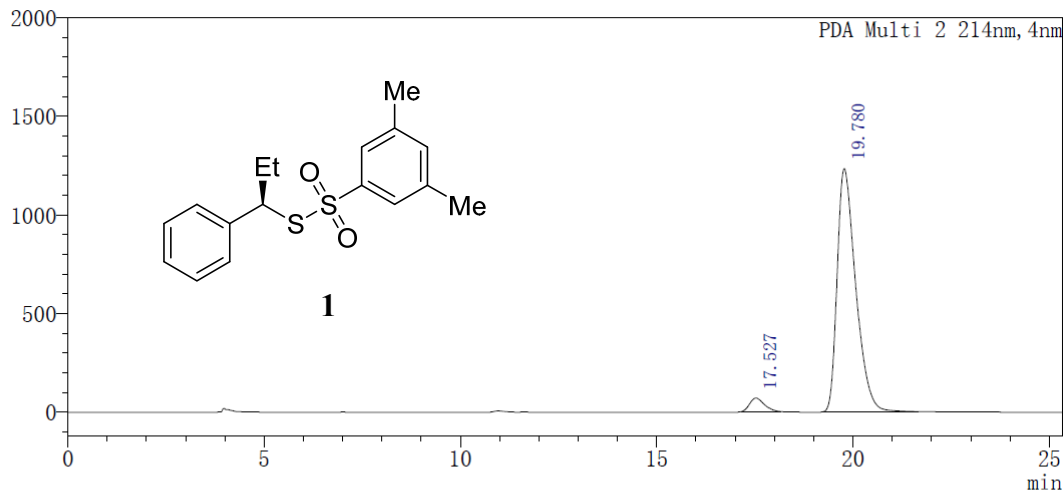

PDA Ch2 214nm

| T      | Hight   | Area     | Area%  |
|--------|---------|----------|--------|
| 17.527 | 68664   | 1776427  | 4.205  |
| 19.780 | 1231847 | 40467078 | 95.795 |

mAU

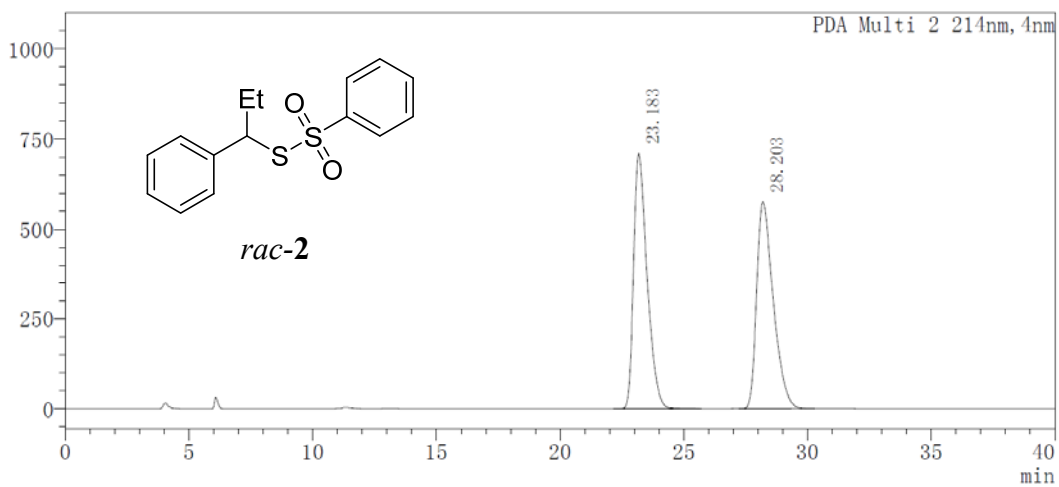

PDA Ch2 214nm

| T      | Hight  | Area     | Area%  |
|--------|--------|----------|--------|
| 23.183 | 709940 | 26913022 | 50.057 |
| 28.203 | 575249 | 26851529 | 49.943 |

mAU

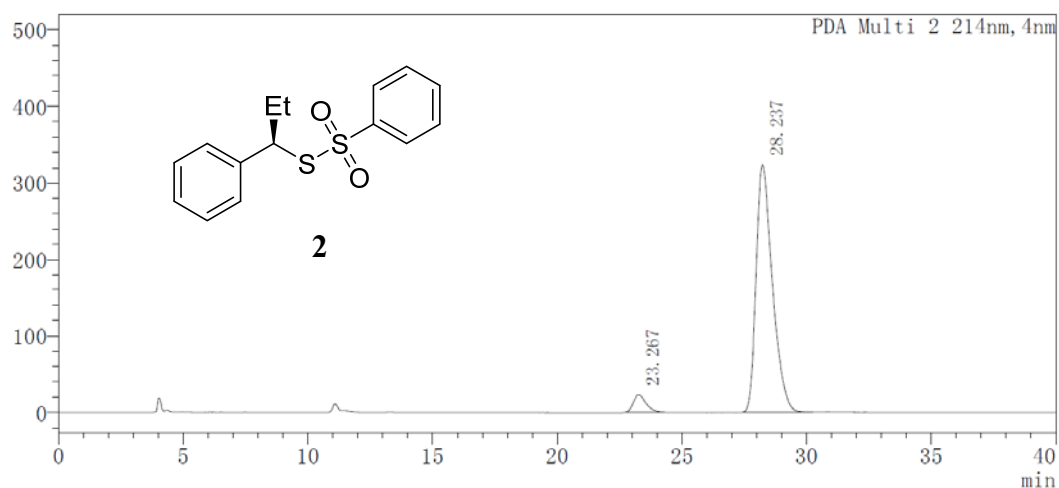

PDA Ch2 214nm

| T      | Hight  | Area     | Area%  |
|--------|--------|----------|--------|
| 23.267 | 22903  | 808353   | 5.209  |
| 28.237 | 323184 | 14711073 | 94.791 |

mAU

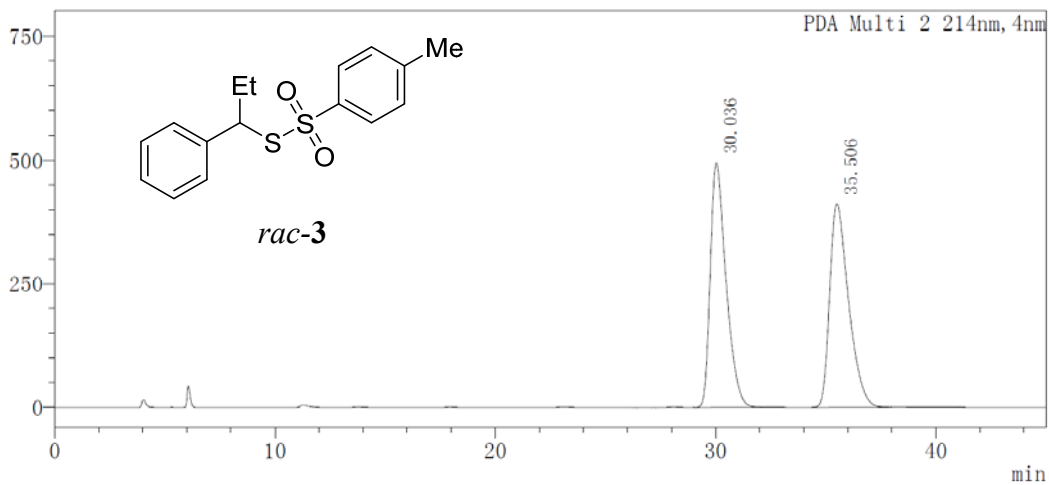

PDA Ch2 214nm

| T      | Hight  | Area     | Area%  |
|--------|--------|----------|--------|
| 30.036 | 493878 | 24538554 | 50.058 |
| 35.506 | 411578 | 24481263 | 49.942 |

mAU

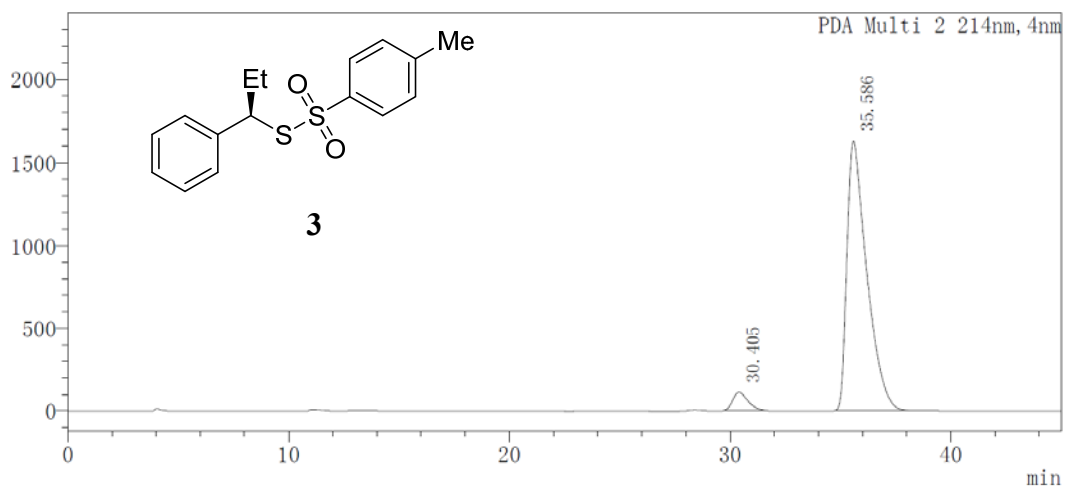

PDA Ch2 214nm

| T      | Hight   | Area      | Area%  |
|--------|---------|-----------|--------|
| 30.405 | 113602  | 5439496   | 5.065  |
| 35.586 | 1630018 | 101958464 | 94.935 |



mAU

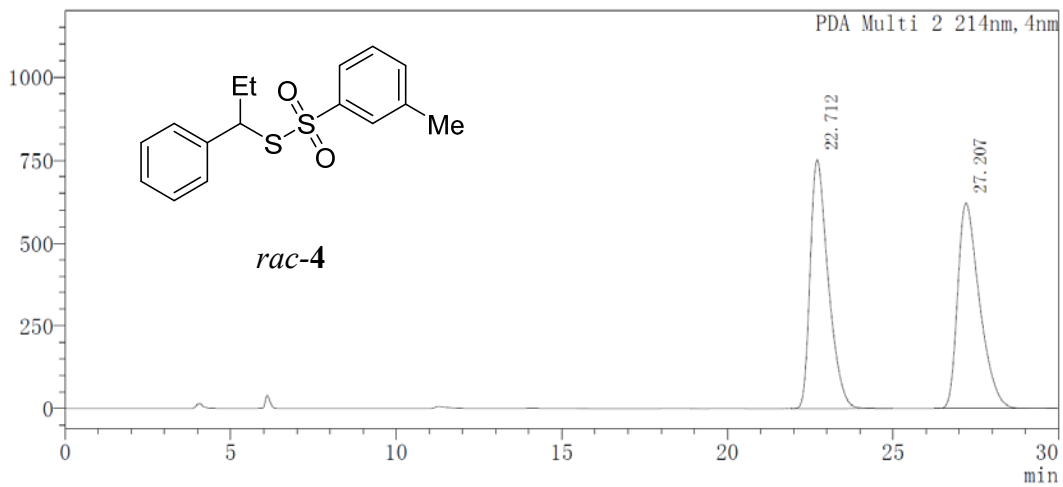

PDA Ch2 214nm

| T      | Hight  | Area     | Area%  |
|--------|--------|----------|--------|
| 22.712 | 751476 | 28532489 | 49.952 |
| 27.207 | 621007 | 28587612 | 50.048 |

mAU

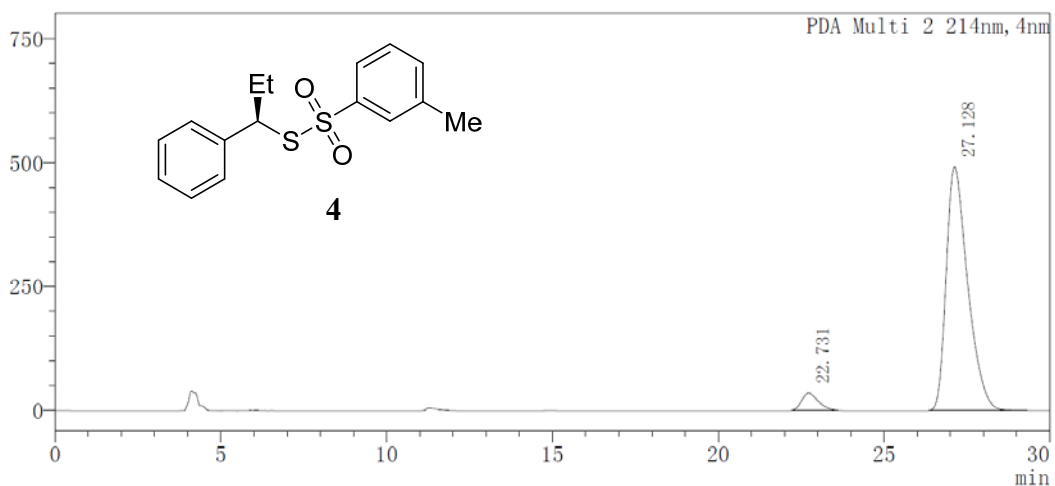

PDA Ch2 214nm

| T      | Hight  | Area     | Area%  |
|--------|--------|----------|--------|
| 22.731 | 35009  | 1221261  | 5.227  |
| 27.128 | 491035 | 22142498 | 94.773 |

mAU

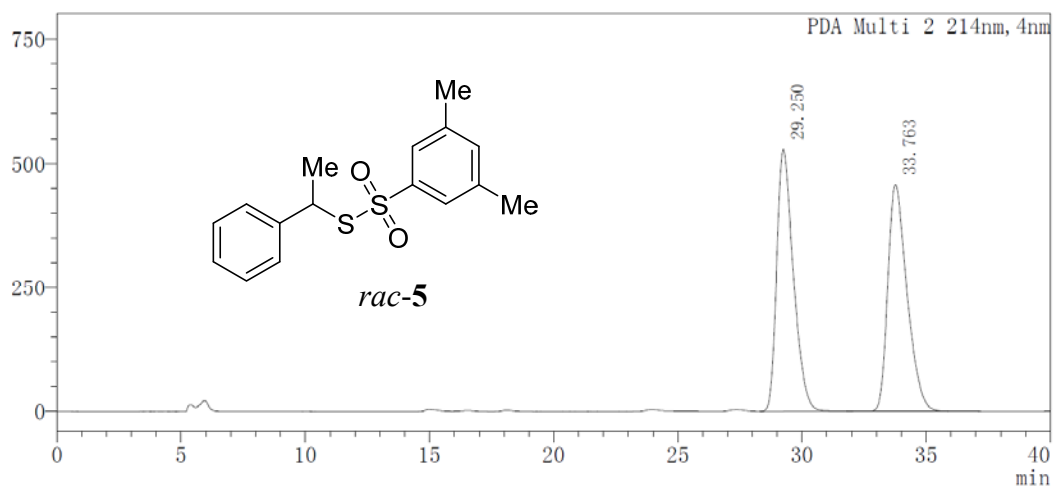

PDA Ch2 214nm

| T      | Hight  | Area     | Area%  |
|--------|--------|----------|--------|
| 29.250 | 527823 | 24644777 | 50.094 |
| 33.763 | 456584 | 24552104 | 49.906 |

mAU

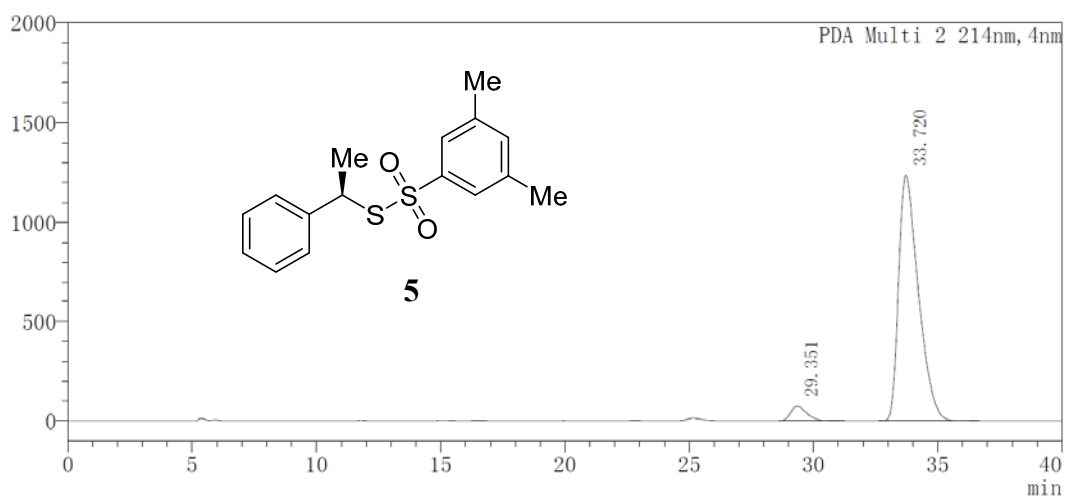

PDA Ch2 214nm

| T      | Hight   | Area     | Area%  |
|--------|---------|----------|--------|
| 29.351 | 74255   | 3363908  | 4.684  |
| 33.720 | 1236422 | 68456512 | 95.316 |

mAU

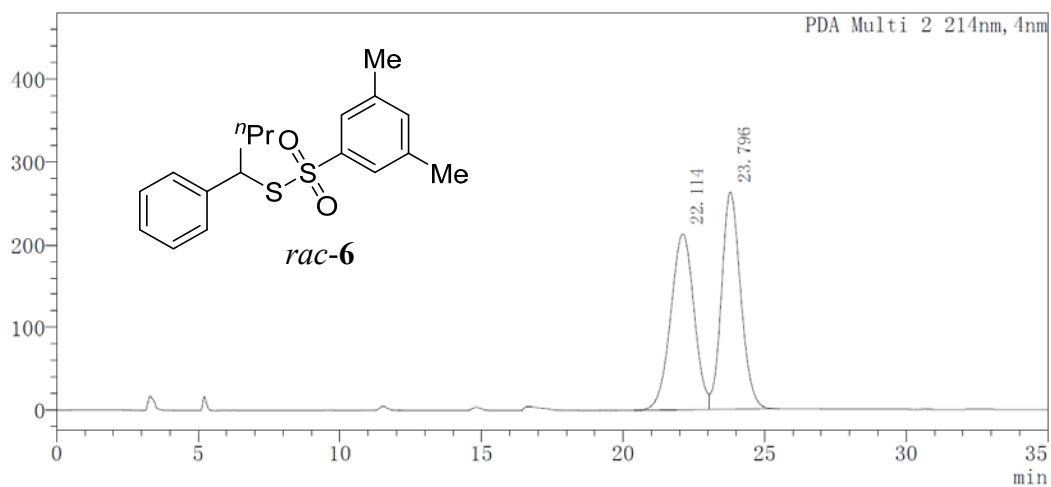

PDA Ch2 214nm

| T      | Hight  | Area     | Area%  |
|--------|--------|----------|--------|
| 22.114 | 213390 | 12233929 | 49.713 |
| 23.796 | 263059 | 12375388 | 50.287 |

mAU

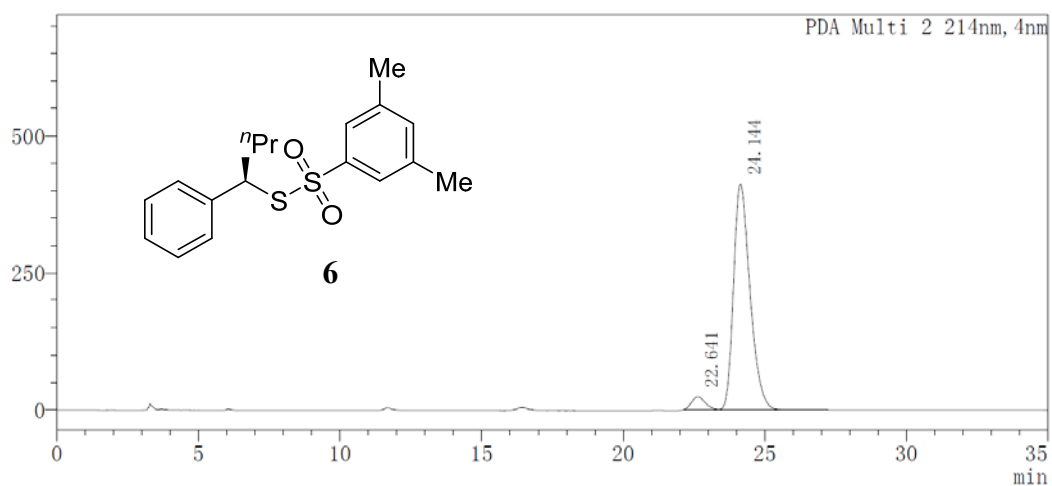

PDA Ch2 214nm

| T      | Hight  | Area     | Area%  |
|--------|--------|----------|--------|
| 22.641 | 23471  | 783763   | 4.506  |
| 24.144 | 411116 | 16610480 | 95.494 |

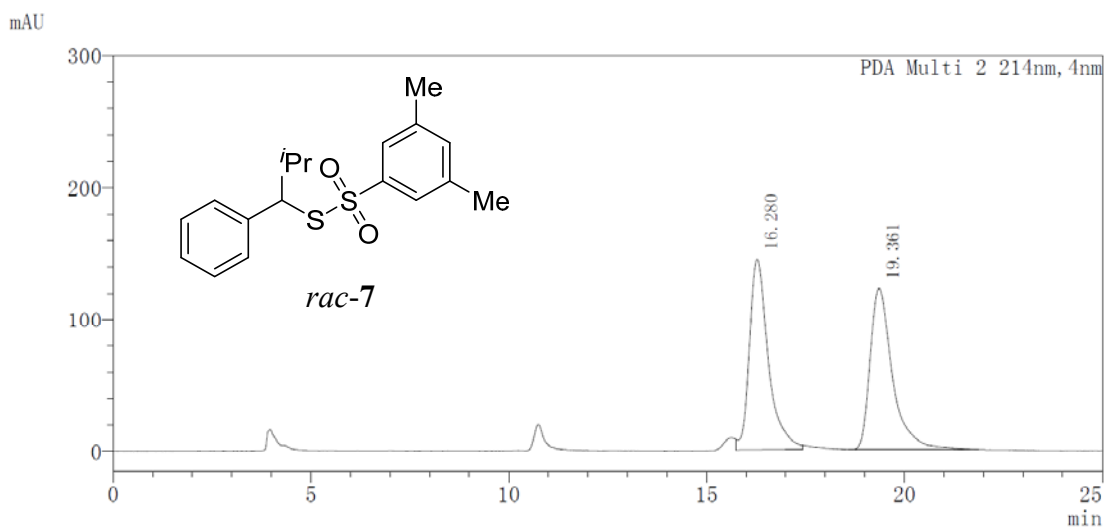

PDA Ch2 214nm

| T      | Hight  | Area    | Area%  |
|--------|--------|---------|--------|
| 16.280 | 144840 | 4824361 | 49.915 |
| 19.361 | 122760 | 4840714 | 50.085 |

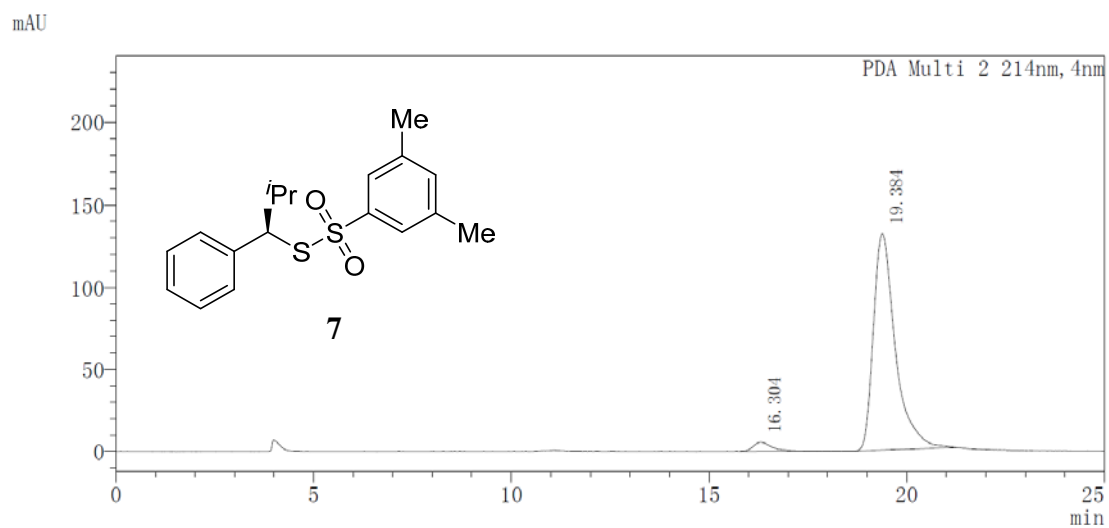

PDA Ch2 214nm

| T      | Hight  | Area    | Area%  |
|--------|--------|---------|--------|
| 16.304 | 5755   | 186925  | 3.536  |
| 19.384 | 131771 | 5099858 | 96.464 |

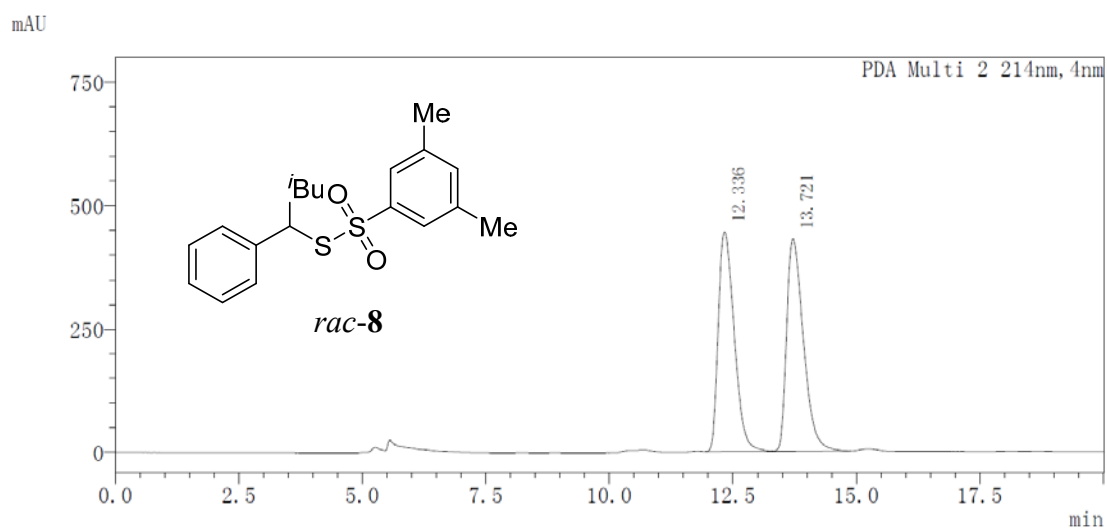

Peak Table

PDA Ch2 214nm

| Peak# | Ret. Time | Area     | Area%  |
|-------|-----------|----------|--------|
| 1     | 12.336    | 10018606 | 49.541 |
| 2     | 13.721    | 10204272 | 50.459 |

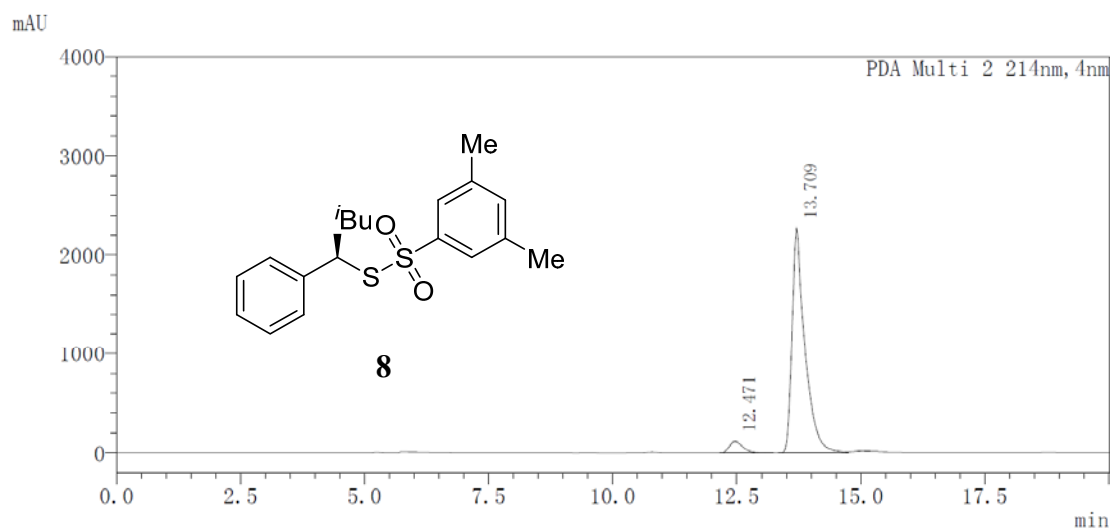

Peak Table

PDA Ch2 214nm

| Peak# | Ret. Time | Area     | Area%  |
|-------|-----------|----------|--------|
| 1     | 12.471    | 2189204  | 5.086  |
| 2     | 13.709    | 40852376 | 94.914 |

mAU

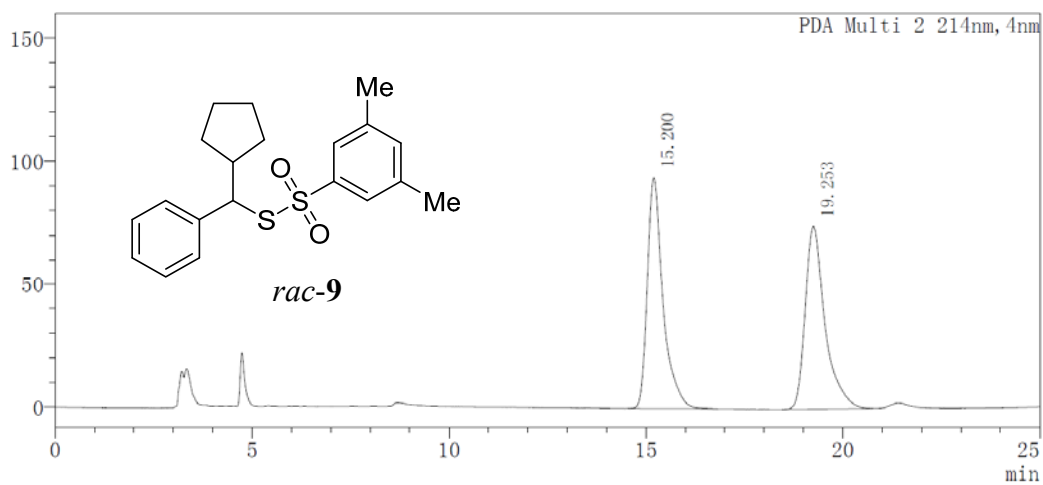

PDA Ch2 214nm

| T      | Hight | Area    | Area%  |
|--------|-------|---------|--------|
| 15.200 | 94054 | 2608311 | 50.073 |
| 19.253 | 74428 | 2600659 | 49.927 |

mAU

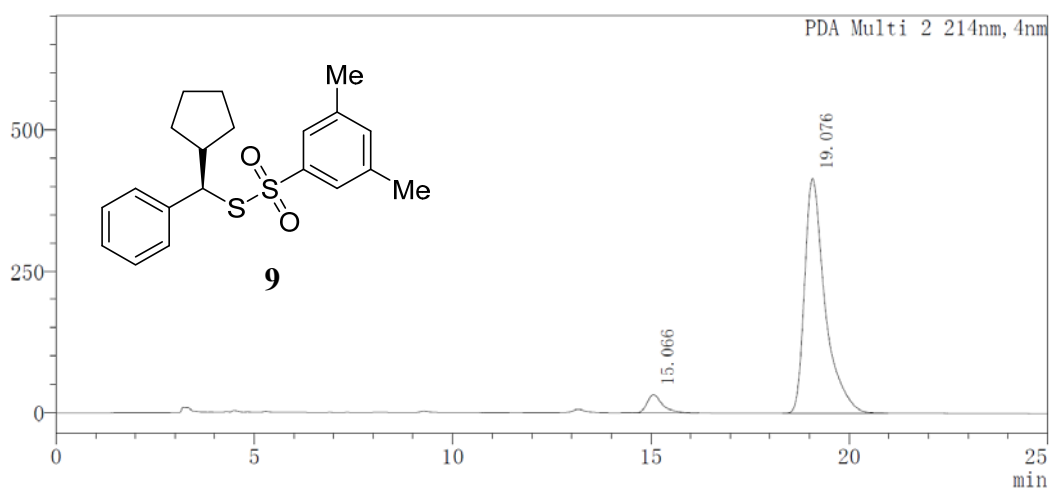

PDA Ch2 214nm

| T      | Hight  | Area     | Area%  |
|--------|--------|----------|--------|
| 15.066 | 32201  | 875199   | 5.556  |
| 19.076 | 414111 | 14876319 | 94.444 |

mAU

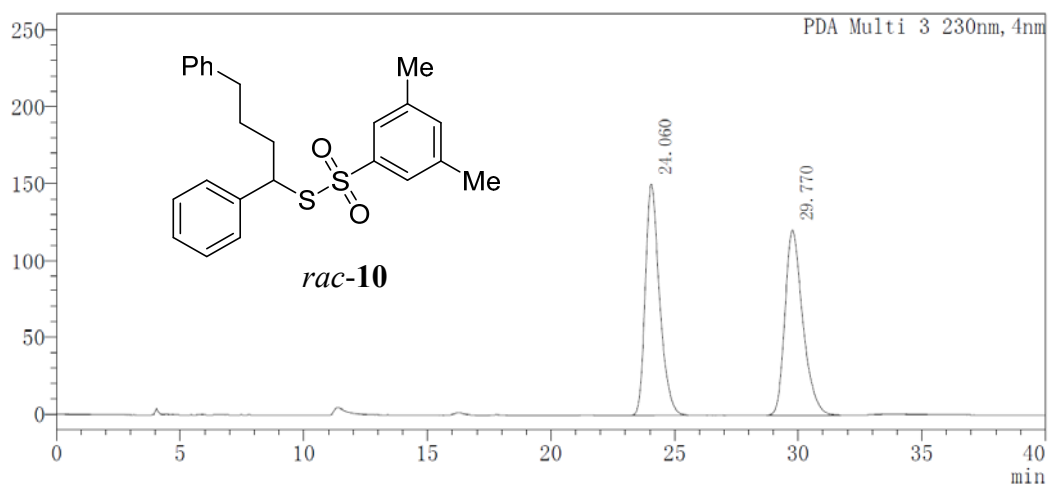

PDA Ch3 230nm

| T      | Hight  | Area    | Area%  |
|--------|--------|---------|--------|
| 24.060 | 150292 | 6000378 | 49.968 |
| 29.770 | 120251 | 6008024 | 50.032 |

mAU

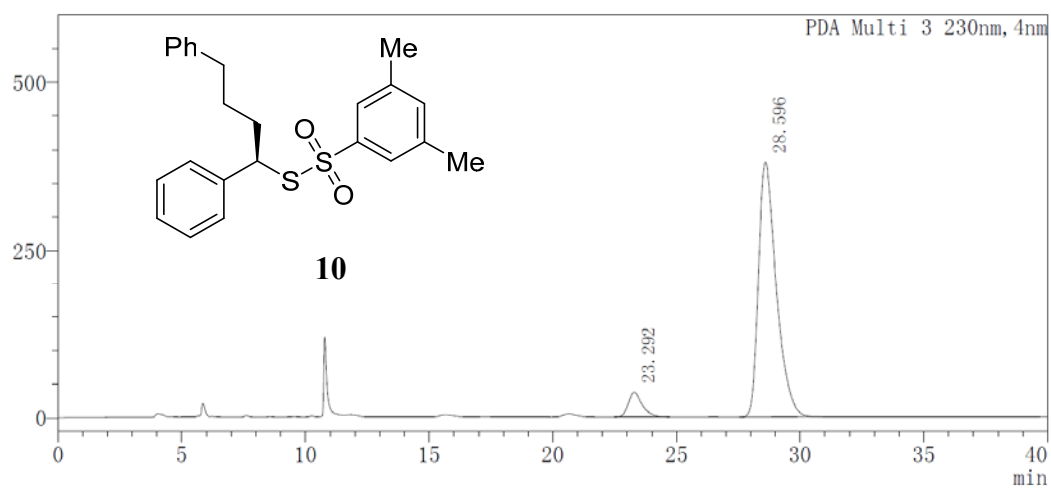

PDA Ch3 230nm

| T      | Hight  | Area     | Area%  |
|--------|--------|----------|--------|
| 23.292 | 36526  | 1433258  | 7.009  |
| 28.596 | 380290 | 19016121 | 92.991 |

mAU

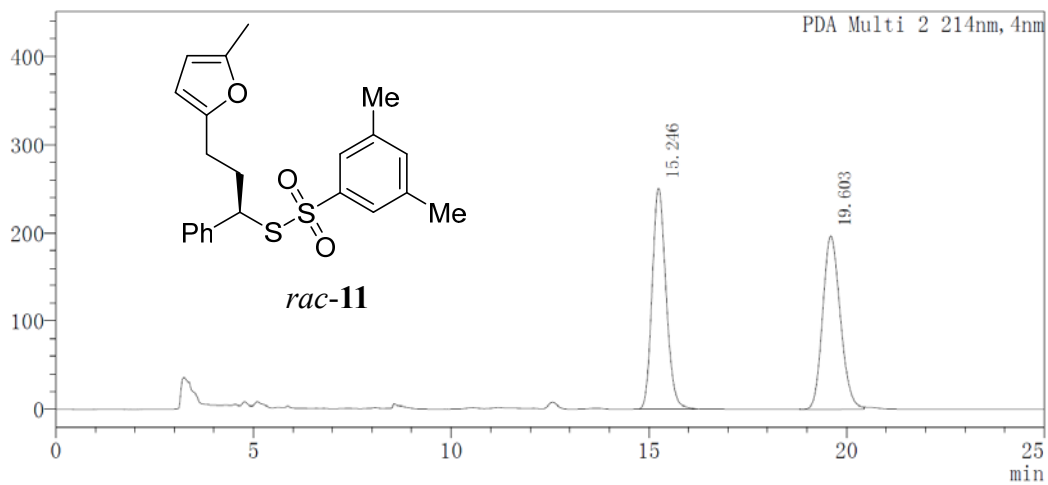

PDA Ch2 214nm

| T      | Hight  | Area    | Area%  |
|--------|--------|---------|--------|
| 15.246 | 251020 | 6138647 | 50.024 |
| 19.603 | 197101 | 6132793 | 49.976 |

mAU

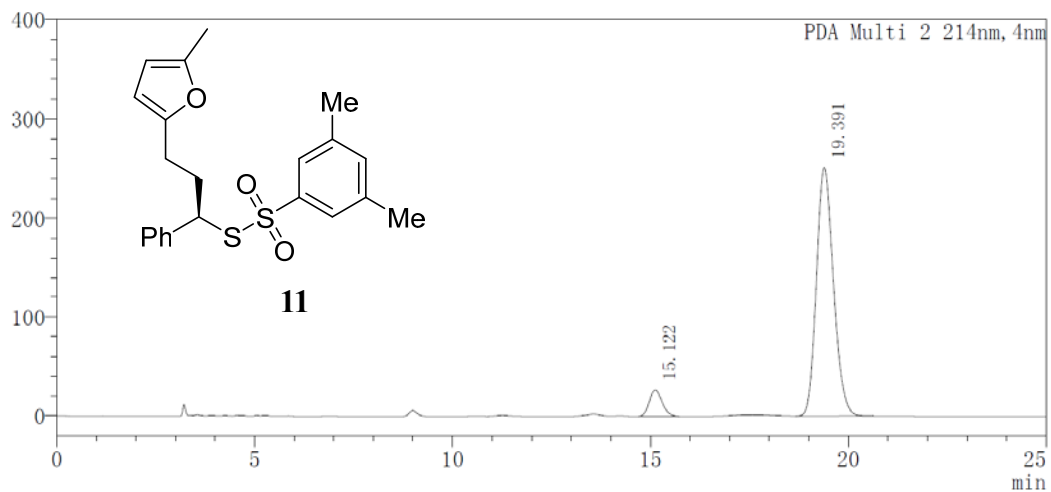

PDA Ch2 214nm

| T      | Hight  | Area    | Area%  |
|--------|--------|---------|--------|
| 15.122 | 26853  | 603477  | 7.433  |
| 19.391 | 251242 | 7515036 | 92.567 |



mAU

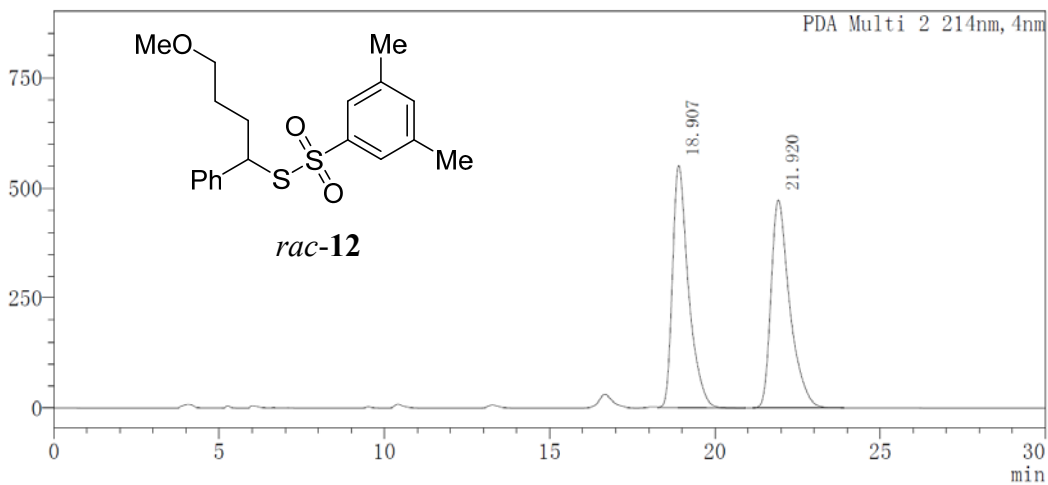

PDA Ch2 214nm

| T      | Hight  | Area     | Area%  |
|--------|--------|----------|--------|
| 18.907 | 550440 | 18484914 | 49.772 |
| 21.920 | 473180 | 18654472 | 50.228 |

mAU

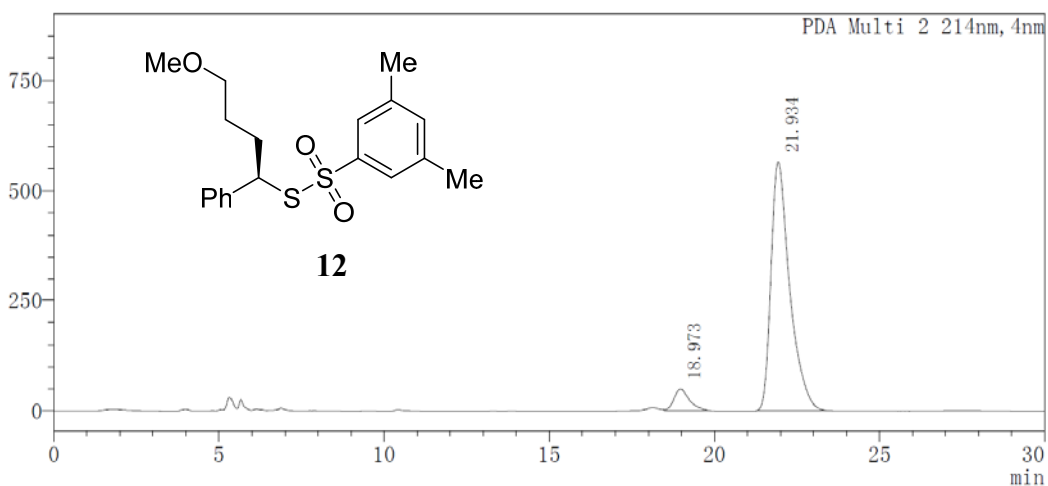

PDA Ch2 214nm

| T      | Hight  | Area     | Area%  |
|--------|--------|----------|--------|
| 18.973 | 48944  | 1548221  | 6.499  |
| 21.934 | 565047 | 22275284 | 93.501 |

mAU

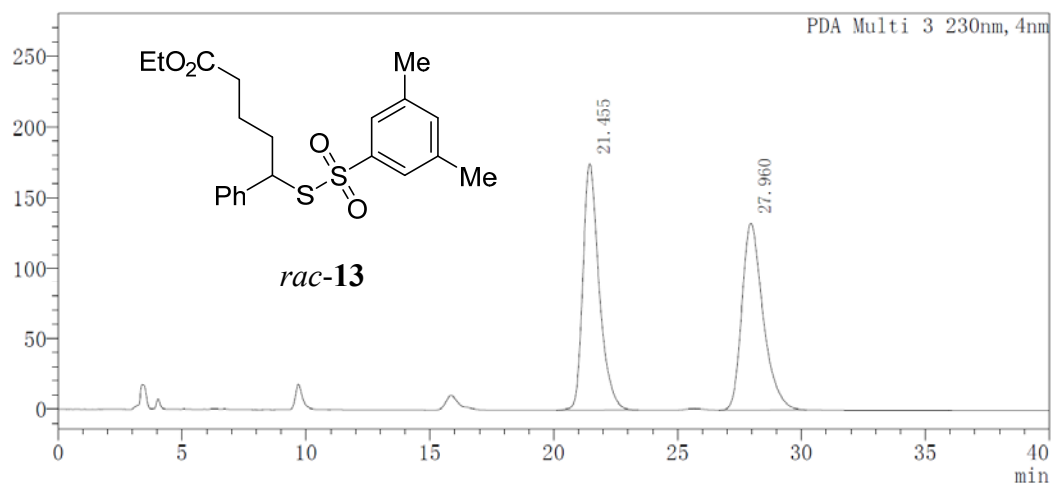

PDA Ch3 230nm

| T      | Hight  | Area    | Area%  |
|--------|--------|---------|--------|
| 21.455 | 174492 | 7940563 | 50.251 |
| 27.960 | 132268 | 7861218 | 49.749 |

mAU

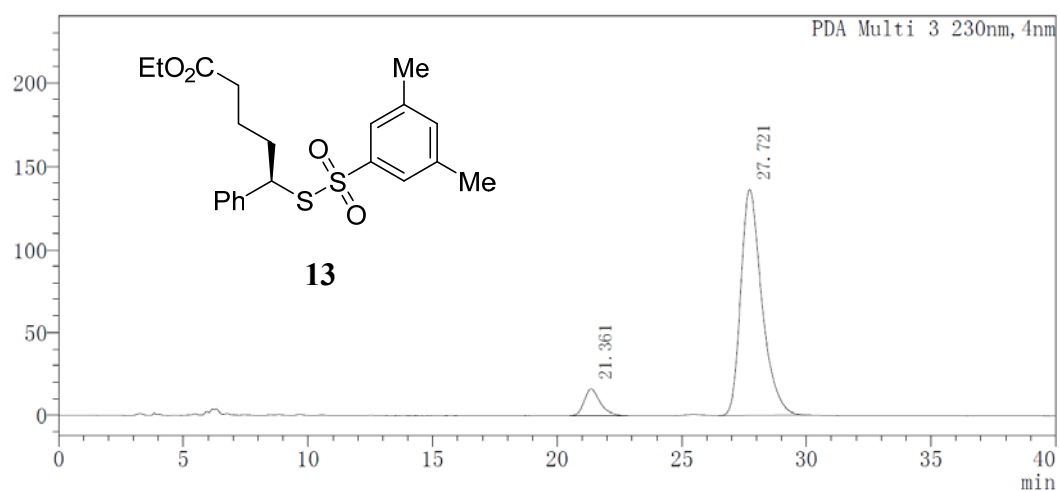

PDA Ch3 230nm

| T      | Hight  | Area    | Area%  |
|--------|--------|---------|--------|
| 21.361 | 16002  | 706336  | 8.064  |
| 27.721 | 136112 | 8053247 | 91.936 |

mAU

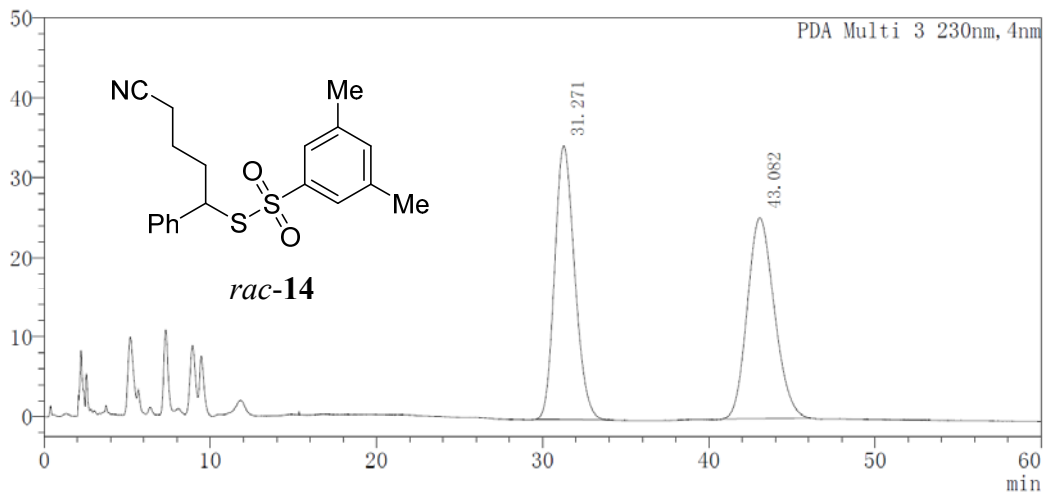

PDA Ch3 230nm

| T      | Hight | Area    | Area%  |
|--------|-------|---------|--------|
| 31.271 | 34308 | 2874512 | 50.160 |
| 43.082 | 25204 | 2856223 | 49.840 |

mAU

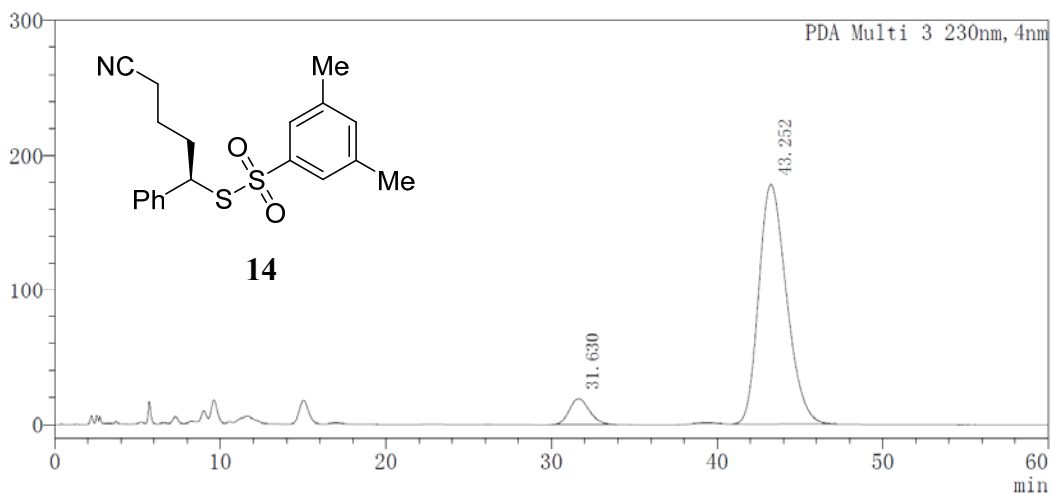

PDA Ch3 230nm

| T      | Hight  | Area     | Area%  |
|--------|--------|----------|--------|
| 31.630 | 19107  | 1598334  | 7.175  |
| 43.252 | 177909 | 20677589 | 92.825 |

mAU

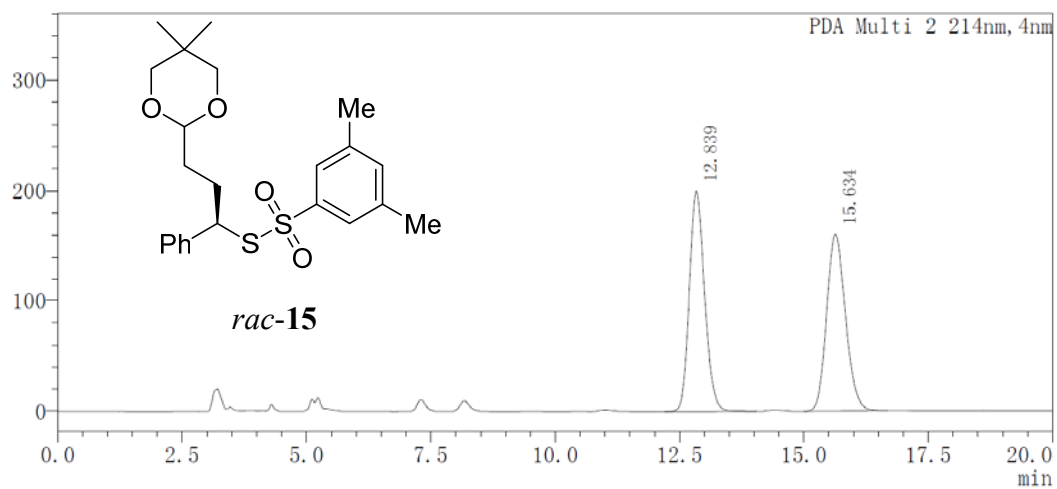

PDA Ch2 214nm

| T      | Hight  | Area    | Area%  |
|--------|--------|---------|--------|
| 12.839 | 199750 | 4265698 | 50.249 |
| 15.634 | 160334 | 4223485 | 49.751 |

mAU

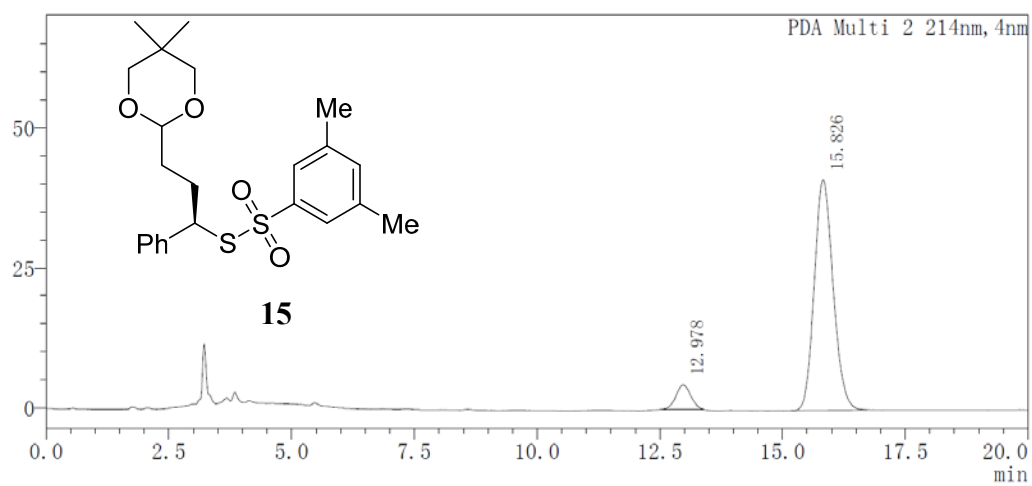

PDA Ch2 214nm

| T      | Hight | Area    | Area%  |
|--------|-------|---------|--------|
| 12.978 | 4393  | 93666   | 7.873  |
| 15.826 | 41076 | 1096097 | 92.127 |

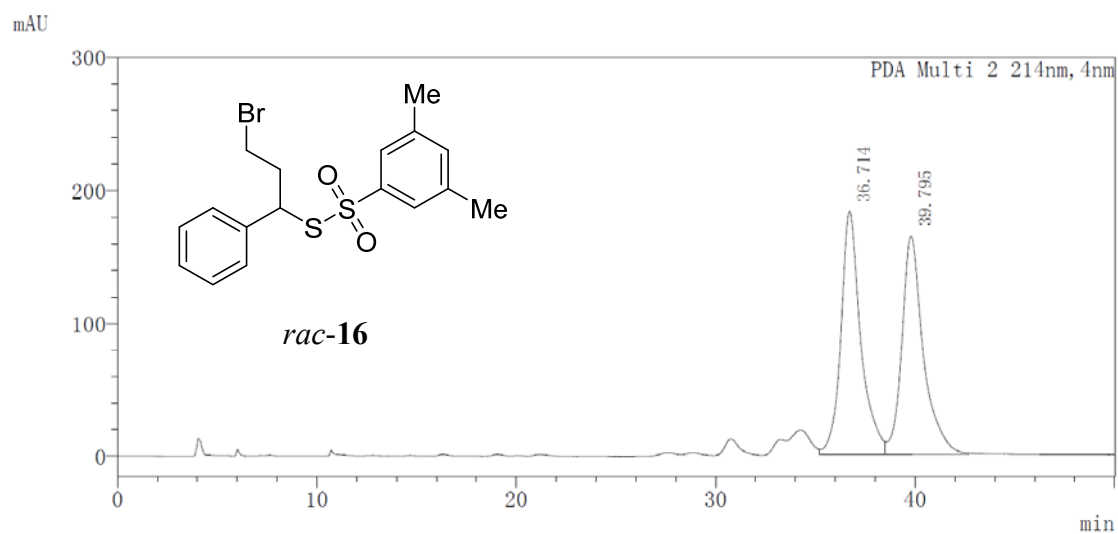

Peak Table

PDA Ch2 214nm

| Peak# | Ret. Time | Area     | Area%  |
|-------|-----------|----------|--------|
| 1     | 36.714    | 12669850 | 50.640 |
| 2     | 39.795    | 12349512 | 49.360 |

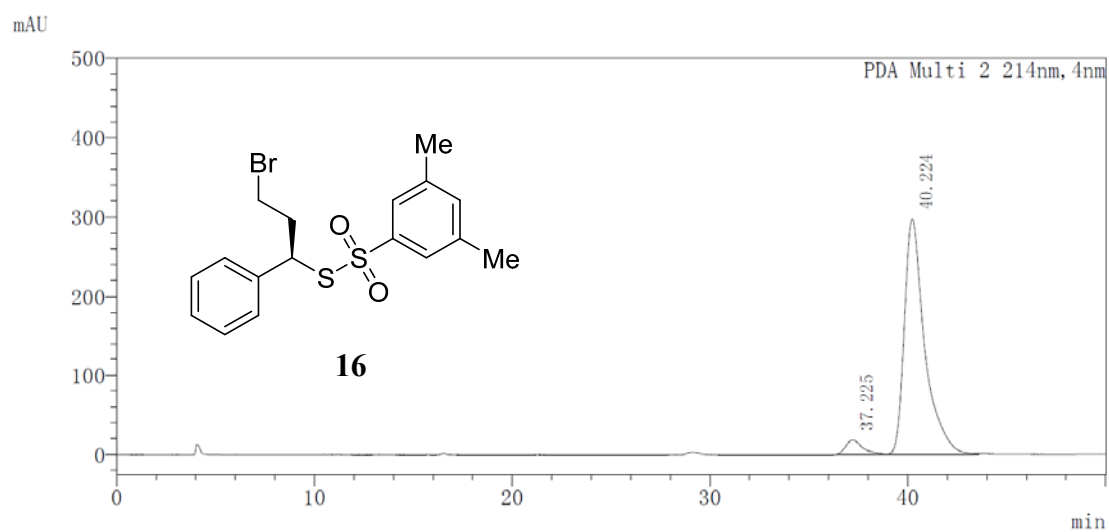

Peak Table

PDA Ch2 214nm

| Peak# | Ret. Time | Area     | Area%  |
|-------|-----------|----------|--------|
| 1     | 37.225    | 1045553  | 4.701  |
| 2     | 40.224    | 21197831 | 95.299 |

mAU

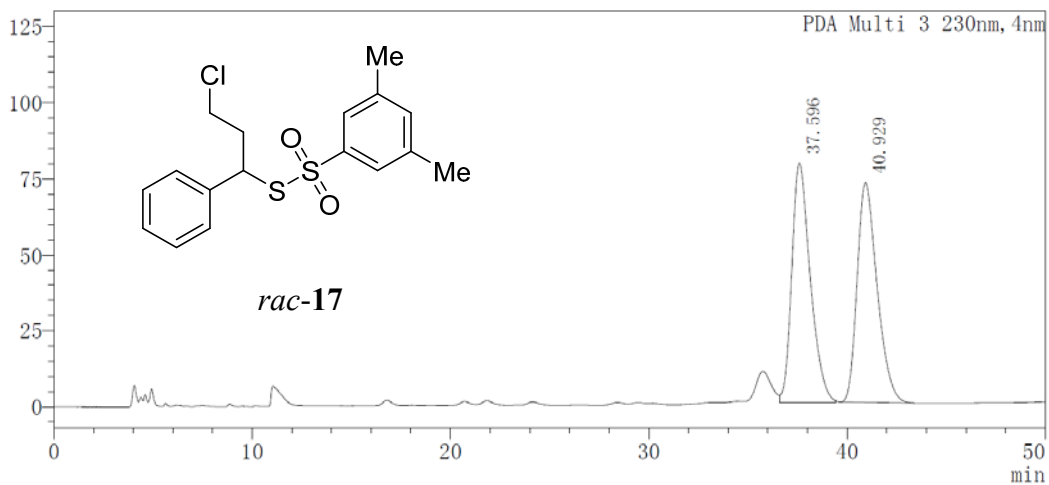

PDA Ch3 230nm

| T      | Hight | Area    | Area%  |
|--------|-------|---------|--------|
| 37.596 | 78800 | 5099901 | 50.139 |
| 40.929 | 72383 | 5071606 | 49.861 |

mAU

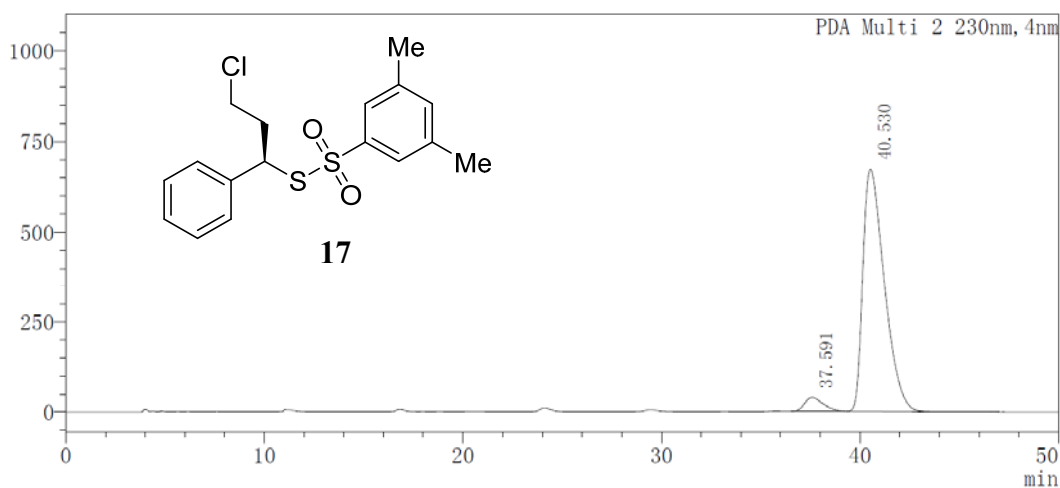

PDA Ch2 230nm

| T      | Hight  | Area     | Area%  |
|--------|--------|----------|--------|
| 37.591 | 39098  | 2486549  | 4.684  |
| 40.530 | 670939 | 50599447 | 95.316 |

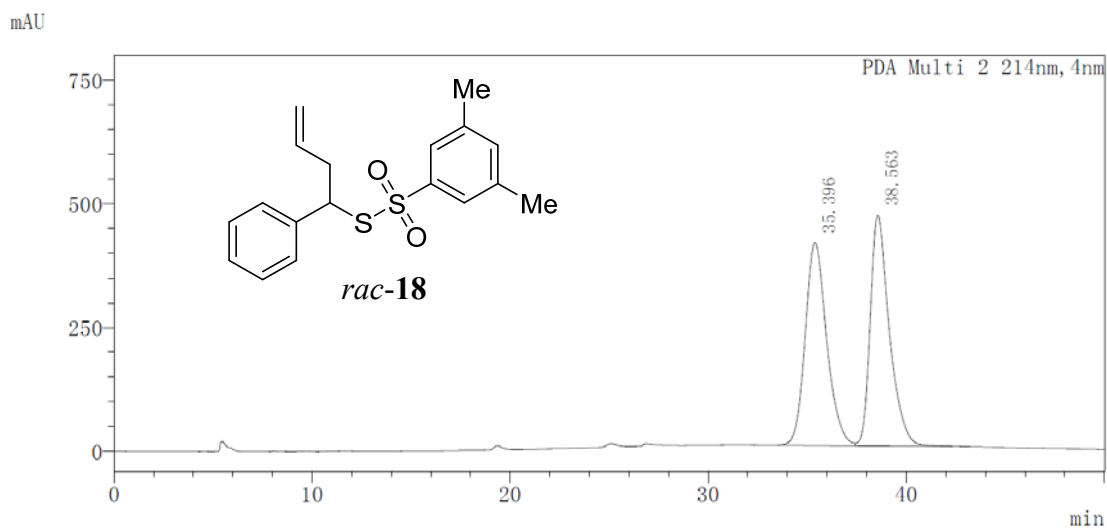

Peak Table

PDA Ch2 214nm

| Peak# | Ret. Time | Area     | Area%  |
|-------|-----------|----------|--------|
| 1     | 35.396    | 30898732 | 49.785 |
| 2     | 38.563    | 31165803 | 50.215 |

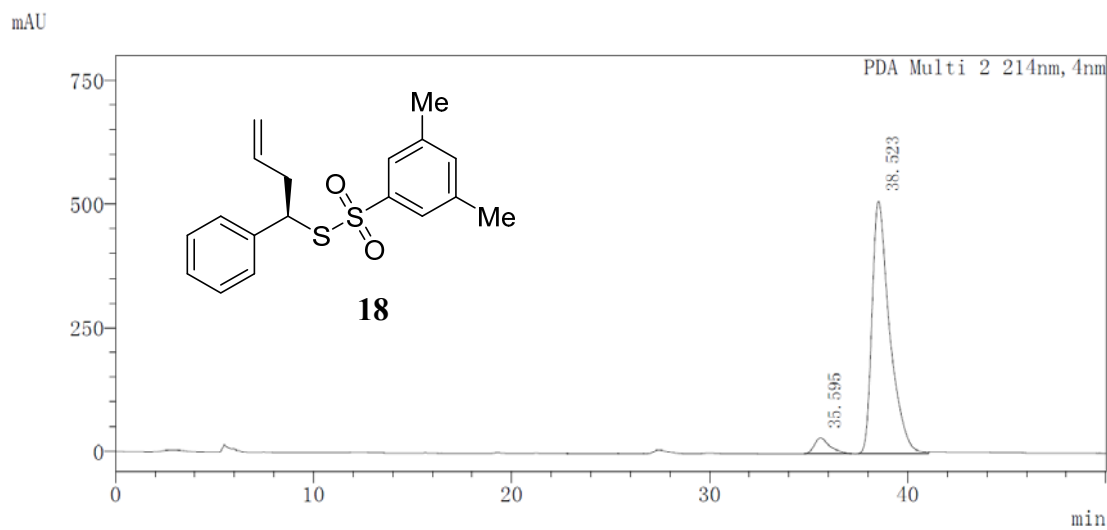

Peak Table

PDA Ch2 214nm

| Peak# | Ret. Time | Area     | Area%  |
|-------|-----------|----------|--------|
| 1     | 35.595    | 1679186  | 5.060  |
| 2     | 38.523    | 31506008 | 94.940 |

mAU

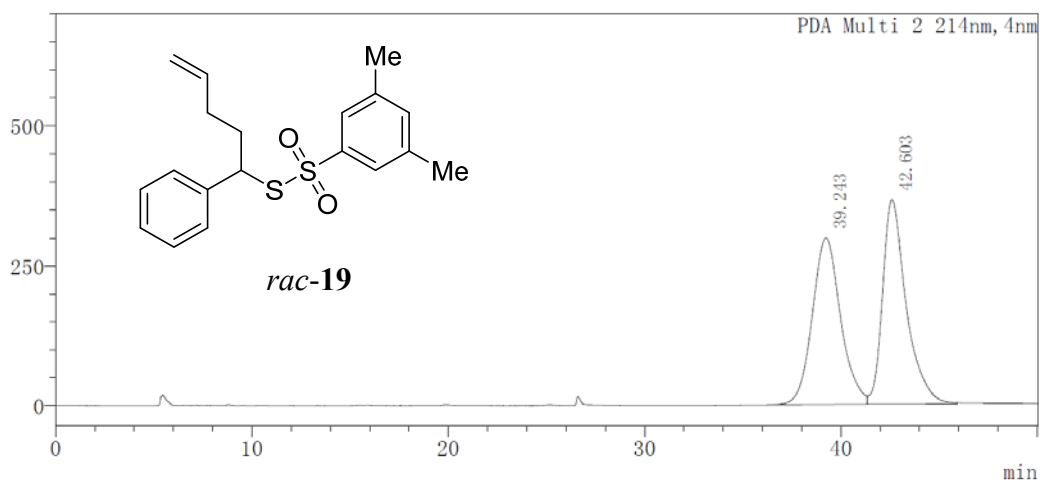

Peak Table

PDA Ch2 214nm

| Peak# | Ret. Time | Area     | Area%  |
|-------|-----------|----------|--------|
| 1     | 39.243    | 29907225 | 49.241 |
| 2     | 42.603    | 30829769 | 50.759 |

mAU

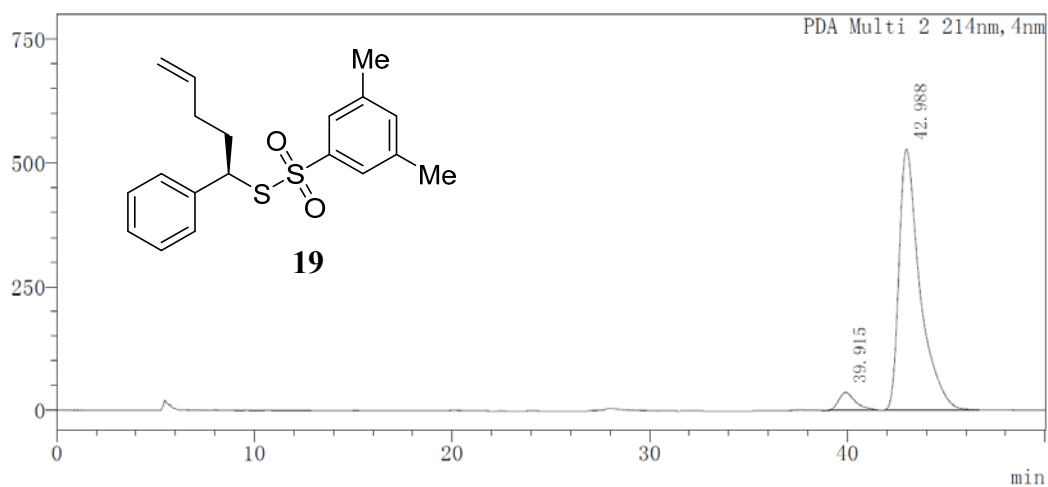

Peak Table

PDA Ch2 214nm

| Peak# | Ret. Time | Area     | Area%  |
|-------|-----------|----------|--------|
| 1     | 39.915    | 2092683  | 5.108  |
| 2     | 42.988    | 38878166 | 94.892 |



mAU

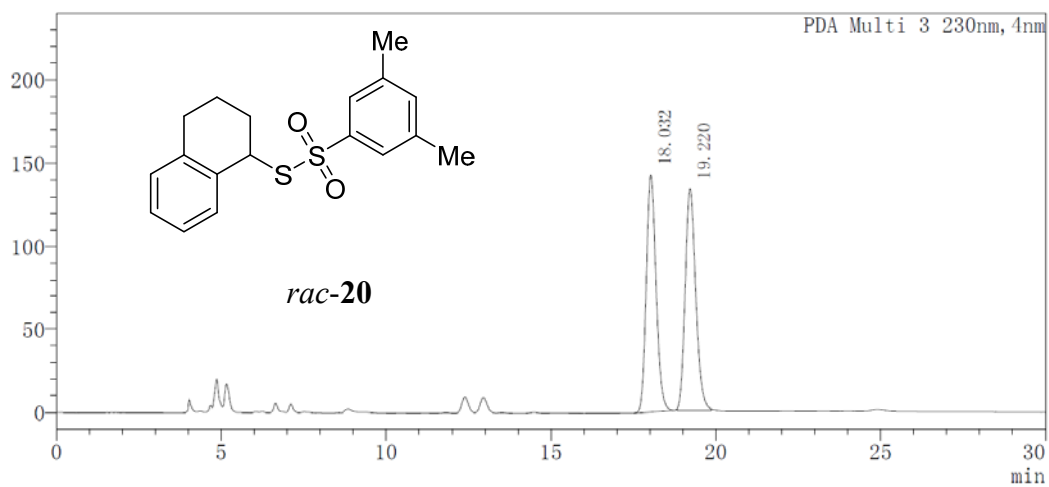

PDA Ch3 230nm

| T      | Hight  | Area    | Area%  |
|--------|--------|---------|--------|
| 18.032 | 142887 | 2954148 | 49.937 |
| 19.220 | 133485 | 2961615 | 50.063 |

mAU

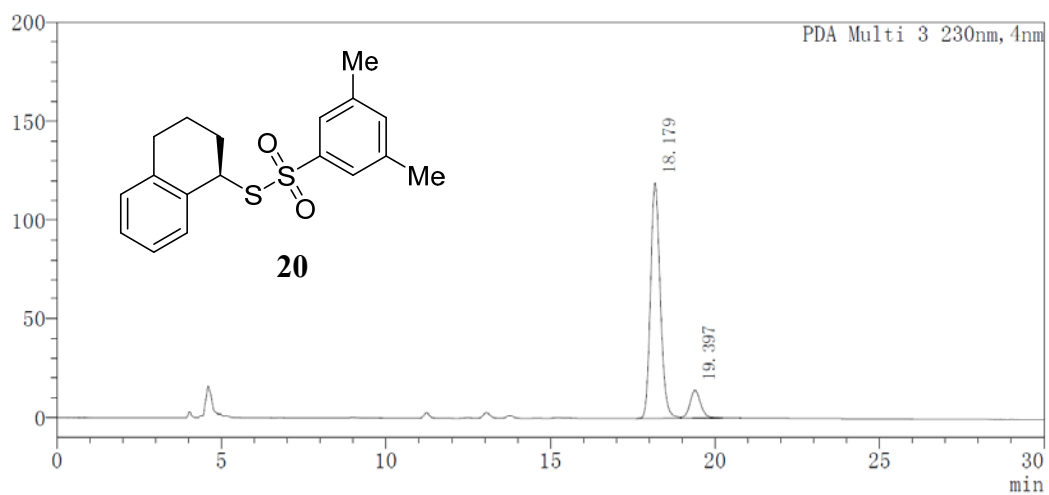

PDA Ch3 230nm

| T      | Hight  | Area    | Area%  |
|--------|--------|---------|--------|
| 18.179 | 119246 | 2453140 | 88.593 |
| 19.397 | 14074  | 315845  | 11.407 |

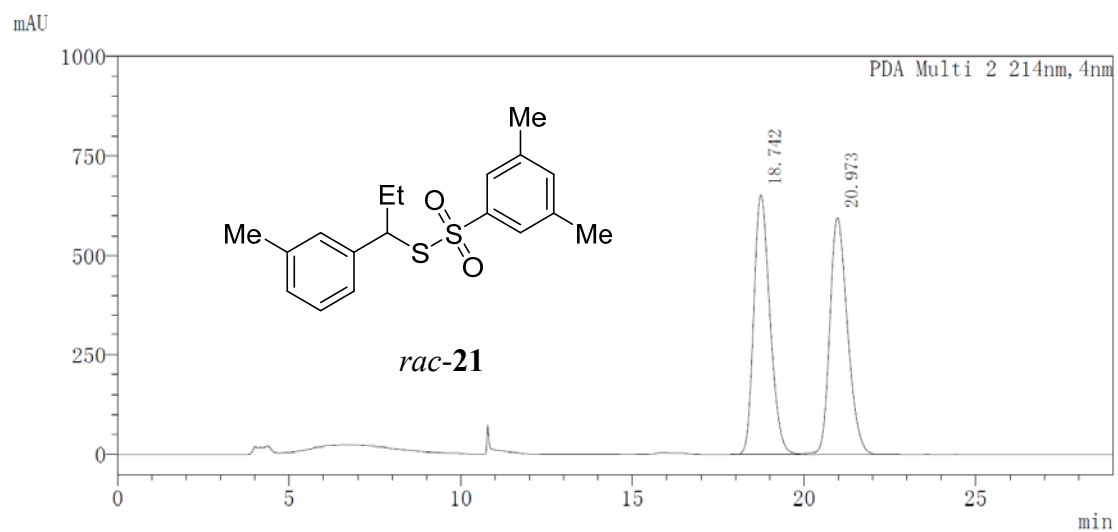

PDA Ch2 214nm

| T      | Hight  | Area     | Area%  |
|--------|--------|----------|--------|
| 18.742 | 653023 | 21351237 | 50.020 |
| 20.973 | 594982 | 21333921 | 49.980 |

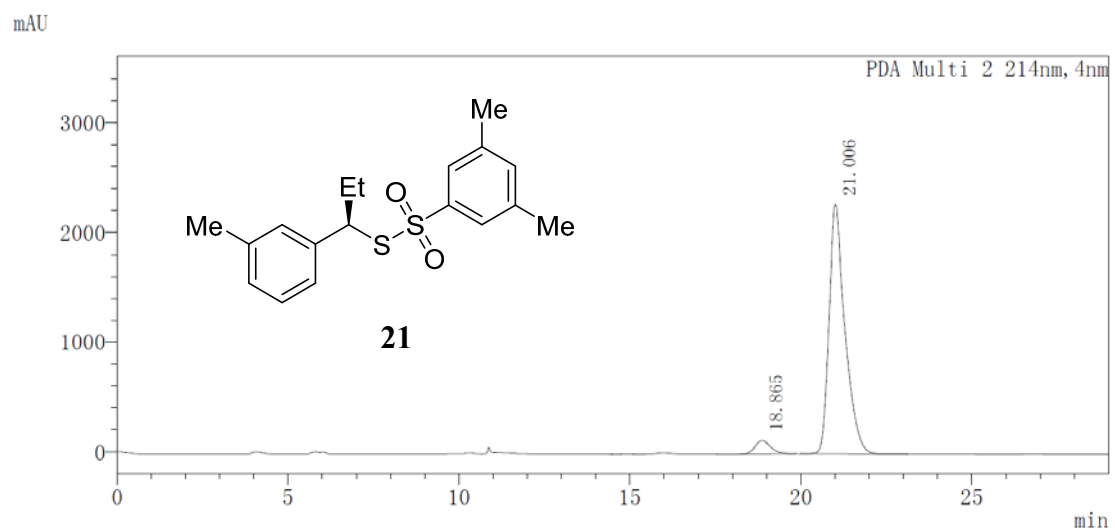

PDA Ch2 214nm

| T      | Hight   | Area     | Area%  |
|--------|---------|----------|--------|
| 18.865 | 123704  | 3862936  | 4.996  |
| 21.006 | 2273772 | 73457719 | 95.004 |

mAU

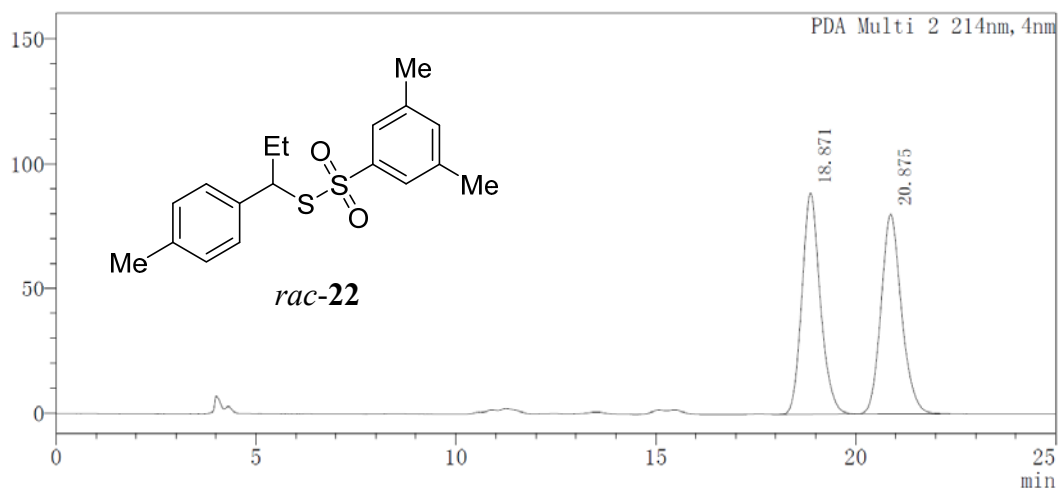

PDA Ch2 214nm

| T      | Hight | Area    | Area%  |
|--------|-------|---------|--------|
| 18.871 | 88502 | 2828989 | 49.913 |
| 20.875 | 79903 | 2838873 | 50.087 |

mAU

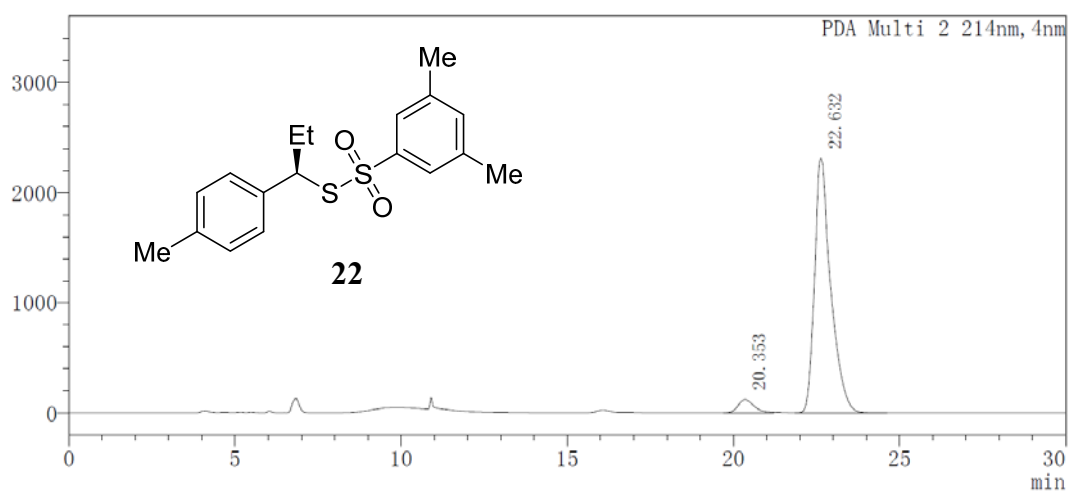

PDA Ch2 214nm

| T      | Hight   | Area     | Area%  |
|--------|---------|----------|--------|
| 20.353 | 122278  | 4163974  | 5.030  |
| 22.632 | 2311520 | 78614100 | 94.970 |

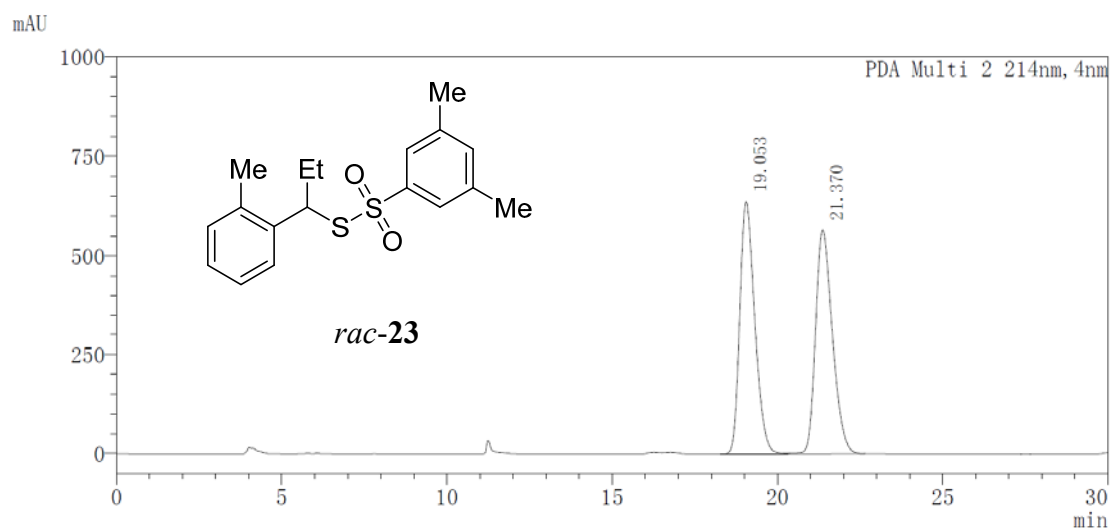

PDA Ch2 214nm

| T      | Hight  | Area     | Area%  |
|--------|--------|----------|--------|
| 19.053 | 636304 | 20093260 | 50.061 |
| 21.370 | 564731 | 20044651 | 49.939 |

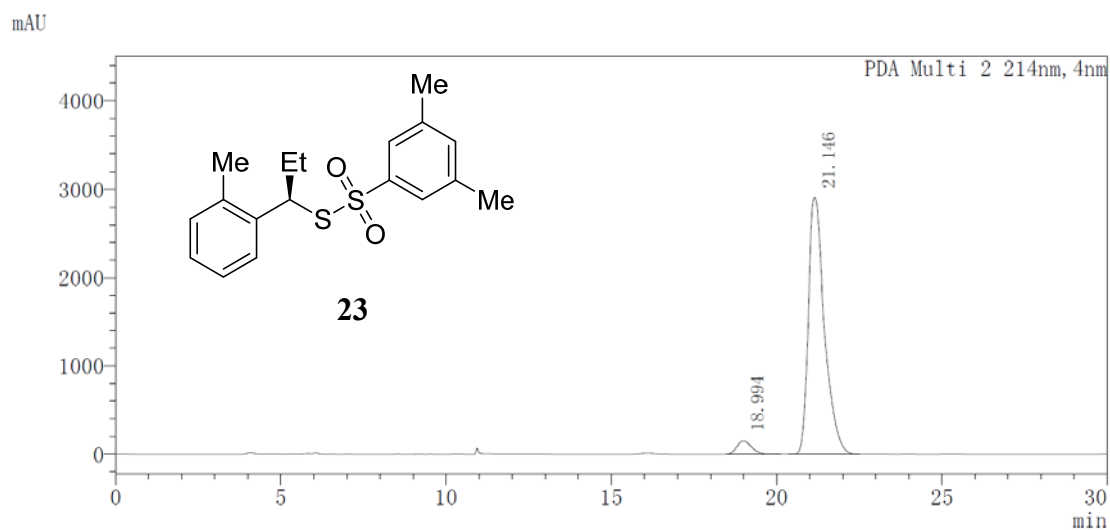

PDA Ch2 214nm

| T      | Hight   | Area     | Area%  |
|--------|---------|----------|--------|
| 18.994 | 153593  | 4777801  | 4.642  |
| 21.146 | 2907391 | 98146756 | 95.358 |

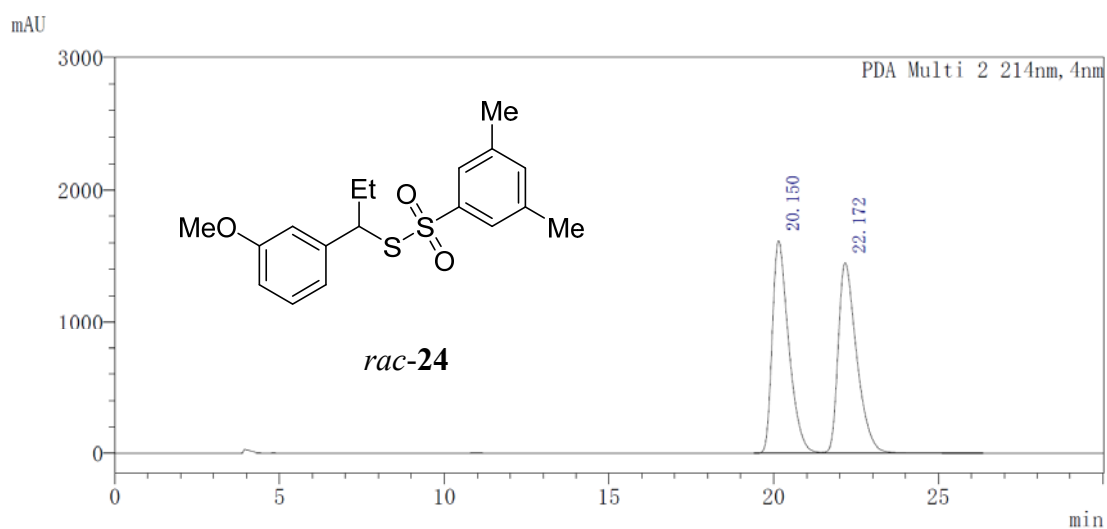

PDA Ch2 214nm

| T      | Hight   | Area     | Area%  |
|--------|---------|----------|--------|
| 20.150 | 1617825 | 56057133 | 49.749 |
| 22.172 | 1450152 | 56622997 | 50.251 |

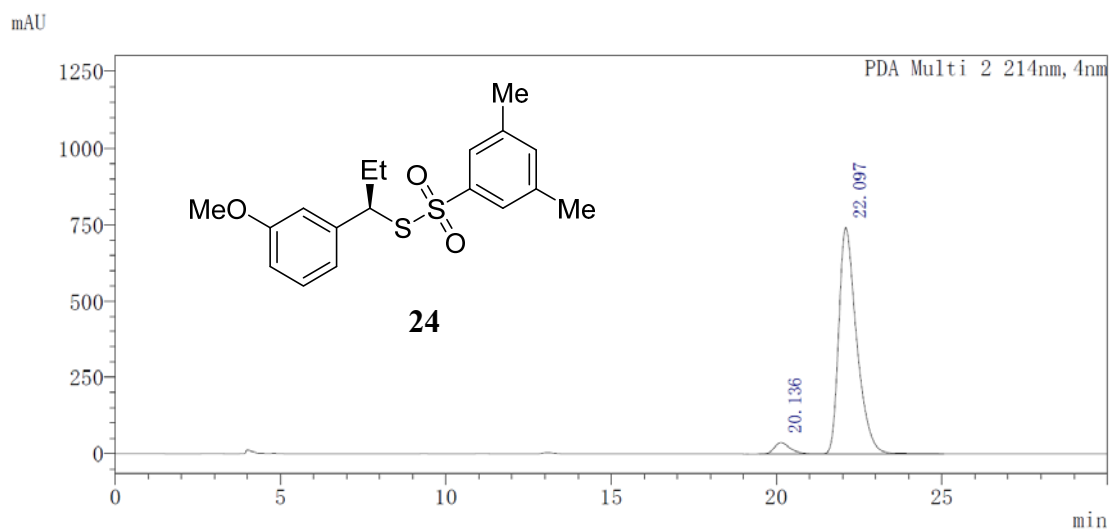

PDA Ch2 214nm

| T      | Hight  | Area     | Area%  |
|--------|--------|----------|--------|
| 20.136 | 37268  | 1228563  | 4.232  |
| 22.097 | 740827 | 27804243 | 95.768 |

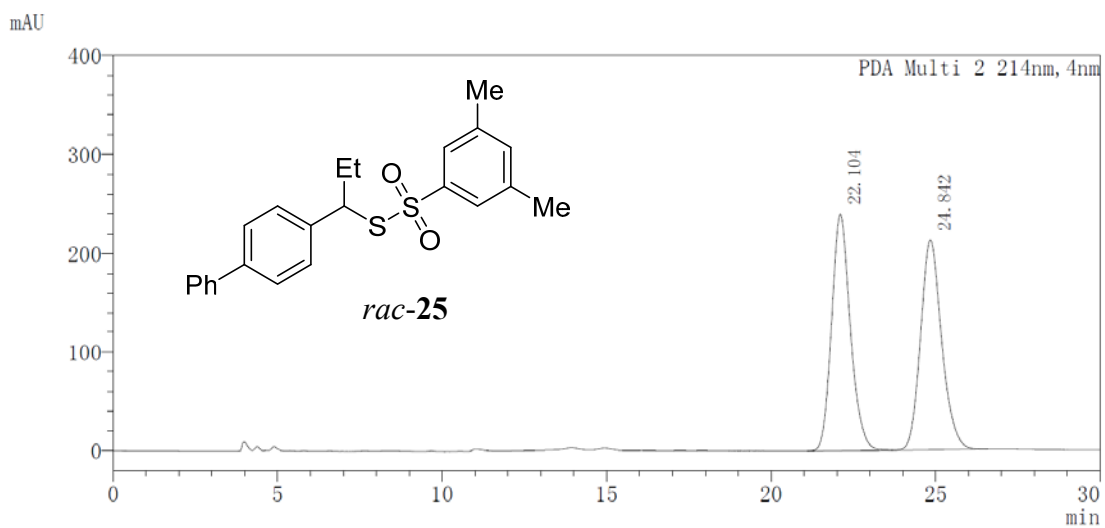

PDA Ch2 214nm

| T      | Hight  | Area    | Area%  |
|--------|--------|---------|--------|
| 22.104 | 239452 | 9480182 | 49.999 |
| 24.842 | 212830 | 9480530 | 50.001 |

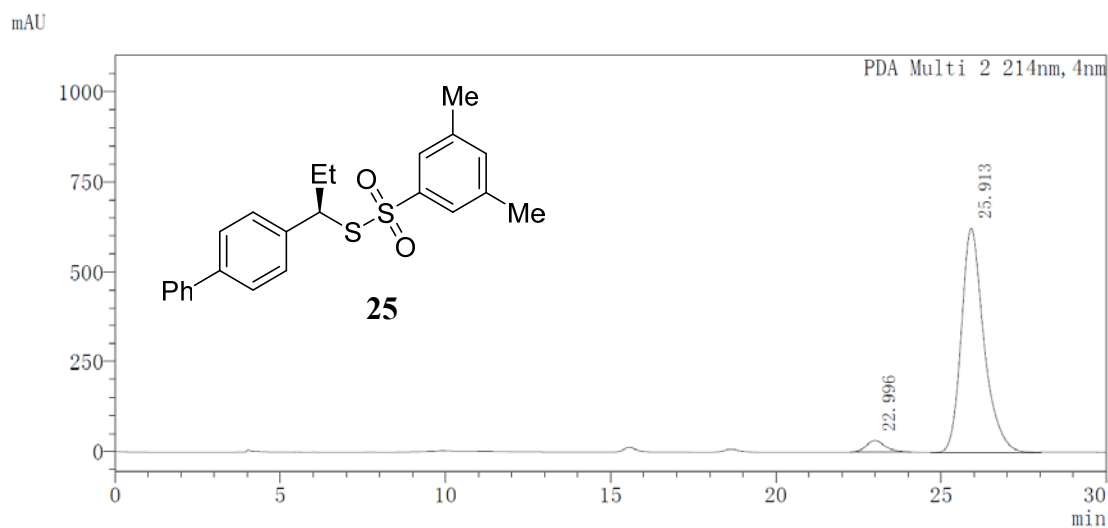

PDA Ch2 214nm

| T      | Hight  | Area     | Area%  |
|--------|--------|----------|--------|
| 22.996 | 32580  | 1305689  | 4.223  |
| 25.913 | 623333 | 29609744 | 95.777 |

mAU

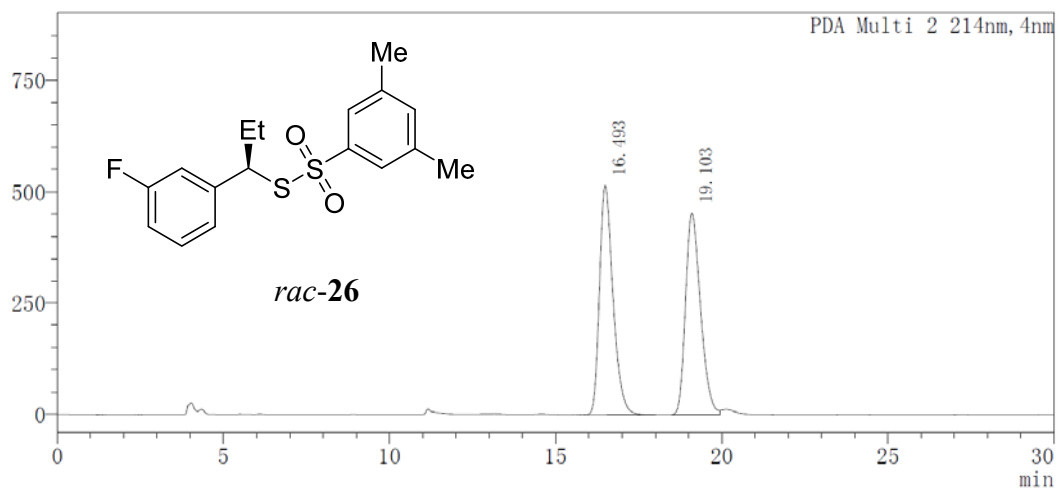

PDA Ch2 214nm

| T      | Hight  | Area     | Area%  |
|--------|--------|----------|--------|
| 16.493 | 514707 | 14562075 | 50.555 |
| 19.103 | 453383 | 14242460 | 49.445 |

mAU

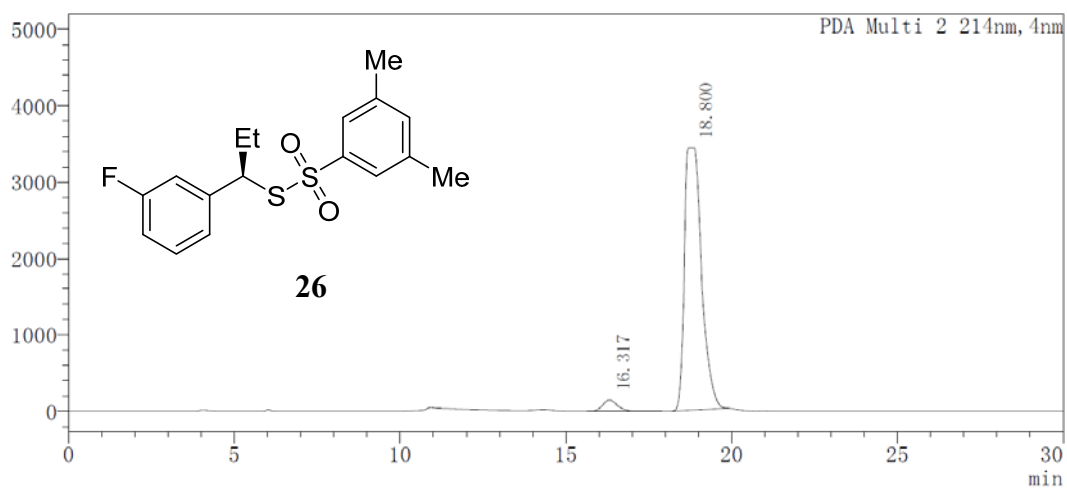

PDA Ch2 214nm

| T      | Hight   | Area      | Area%  |
|--------|---------|-----------|--------|
| 16.317 | 144950  | 4587210   | 3.593  |
| 18.800 | 3433945 | 123074142 | 96.407 |

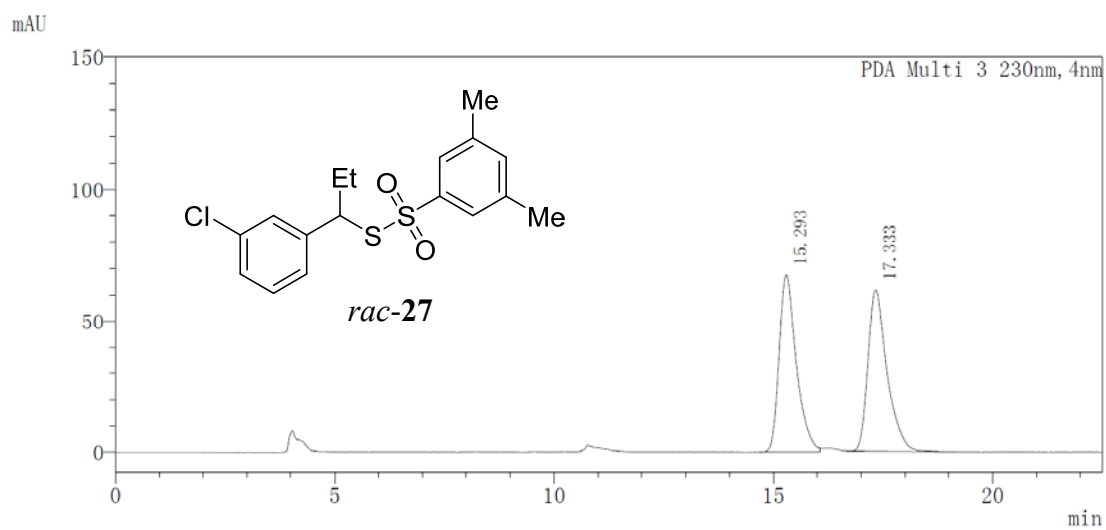

PDA Ch3 230nm

| T      | Hight | Area    | Area%  |
|--------|-------|---------|--------|
| 15.293 | 67656 | 1846037 | 49.684 |
| 17.333 | 61575 | 1869483 | 50.316 |

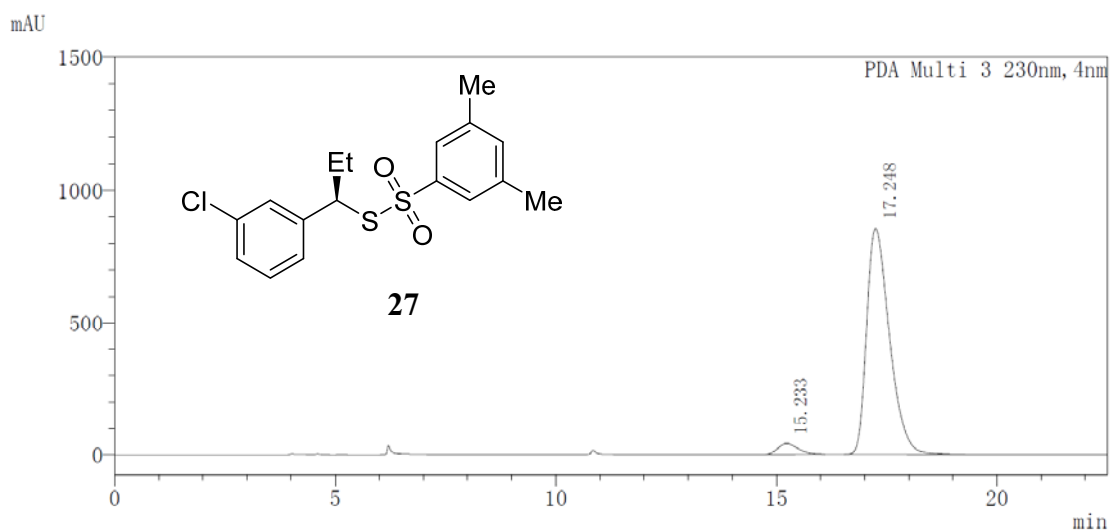

PDA Ch3 230nm

| T      | Hight  | Area     | Area%  |
|--------|--------|----------|--------|
| 15.233 | 41544  | 1296315  | 4.047  |
| 17.248 | 854397 | 30736560 | 95.953 |



mAU

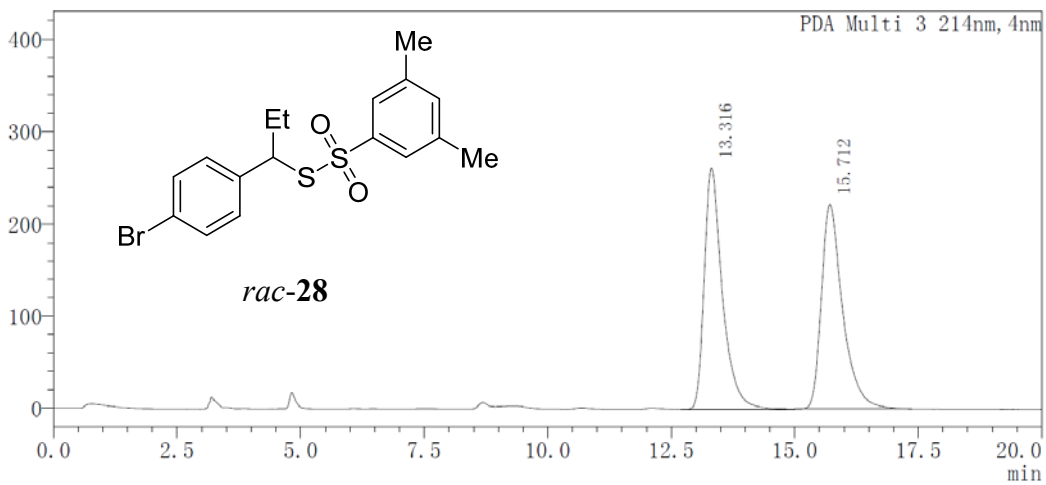

PDA Ch3 214nm

| T      | Hight  | Area    | Area%  |
|--------|--------|---------|--------|
| 13.316 | 260416 | 6662816 | 50.089 |
| 15.712 | 221452 | 6639180 | 49.911 |

mAU

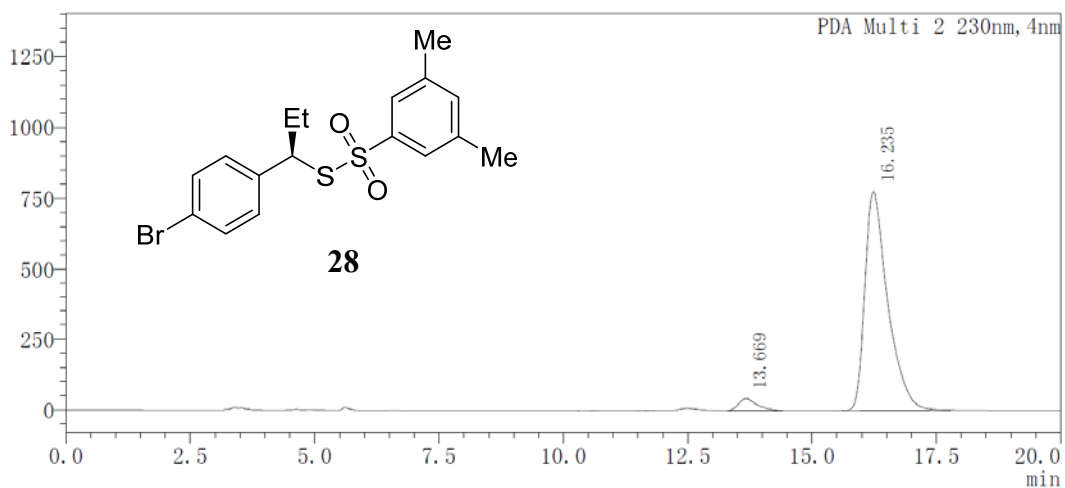

PDA Ch2 230nm

| T      | Hight  | Area     | Area%  |
|--------|--------|----------|--------|
| 13.669 | 42538  | 1066671  | 4.100  |
| 16.235 | 776407 | 24947828 | 95.900 |

mAU

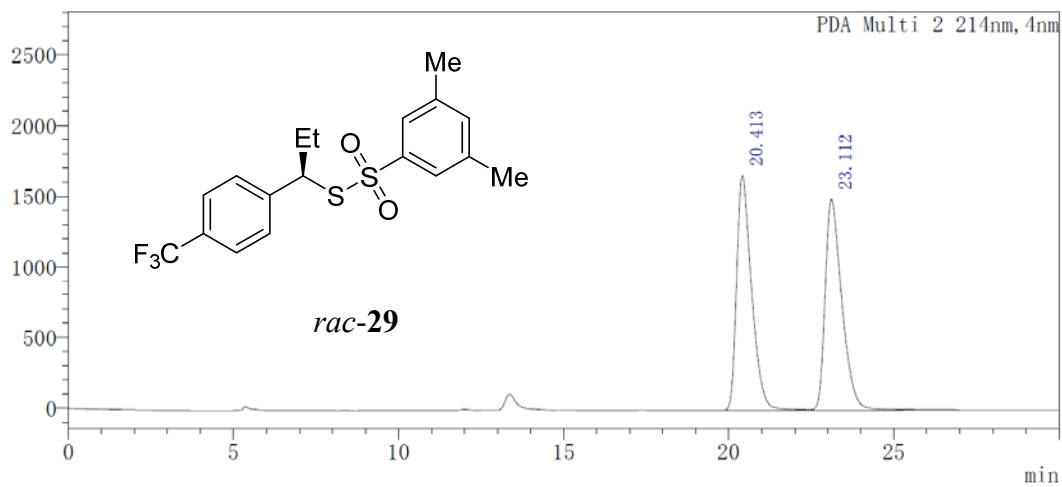

PDA Ch2 214nm

| T      | Hight   | Area     | Area%  |
|--------|---------|----------|--------|
| 20.413 | 1660533 | 52219775 | 49.851 |
| 23.112 | 1491375 | 52532813 | 50.149 |

mAU

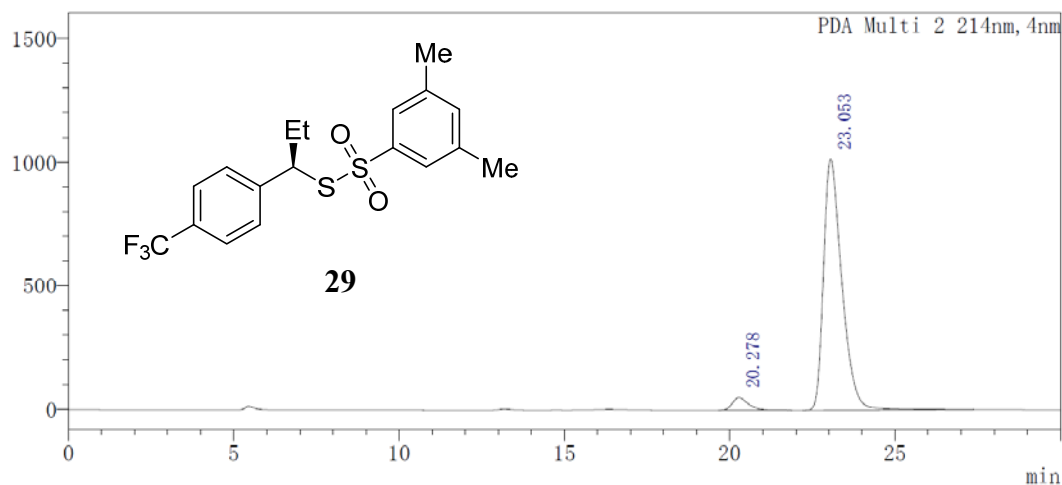

PDA Ch2 214nm

| T      | Hight   | Area     | Area%  |
|--------|---------|----------|--------|
| 20.278 | 50444   | 1673396  | 4.117  |
| 23.053 | 1014288 | 38972494 | 95.883 |

mAU

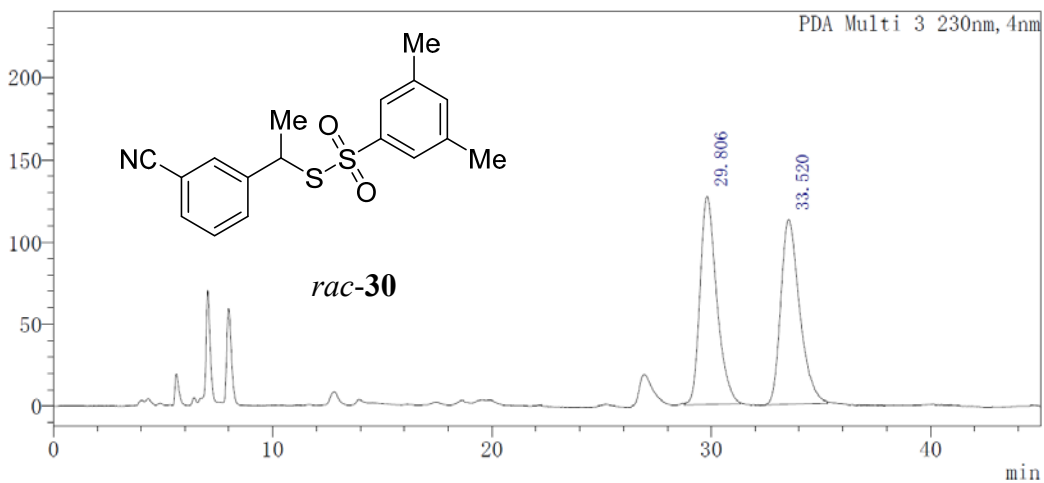

PDA Ch3 230nm

| T      | Hight  | Area    | Area%  |
|--------|--------|---------|--------|
| 29.806 | 126952 | 6709551 | 49.948 |
| 33.520 | 112676 | 6723391 | 50.052 |

mAU

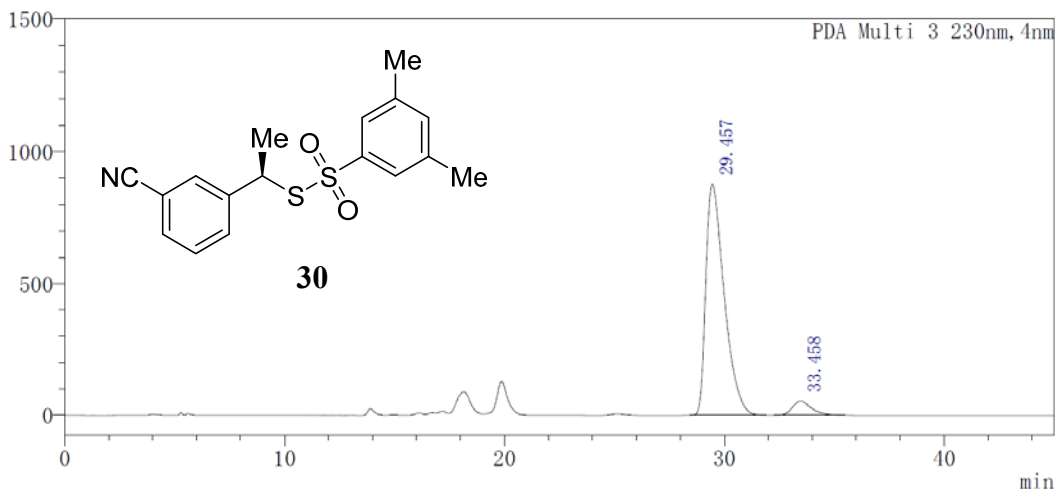

PDA Ch3 230nm

| T      | Hight  | Area     | Area%  |
|--------|--------|----------|--------|
| 29.457 | 876044 | 50972839 | 94.003 |
| 33.458 | 53484  | 3251874  | 5.997  |

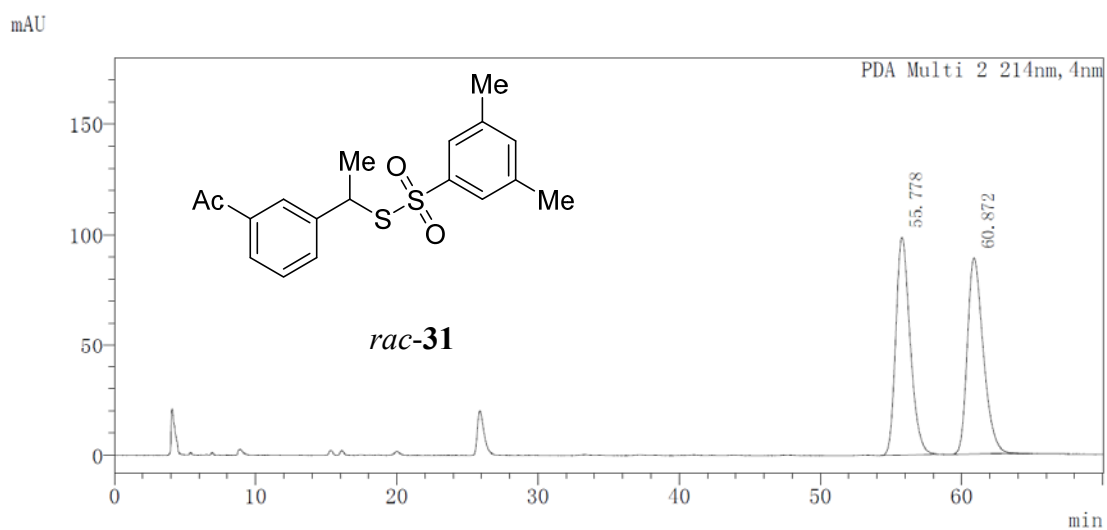

Peak Table

PDA Ch2 214nm

| Peak# | Ret. Time | Area    | Area%  |
|-------|-----------|---------|--------|
| 1     | 55.778    | 6982046 | 49.928 |
| 2     | 60.872    | 7002321 | 50.072 |

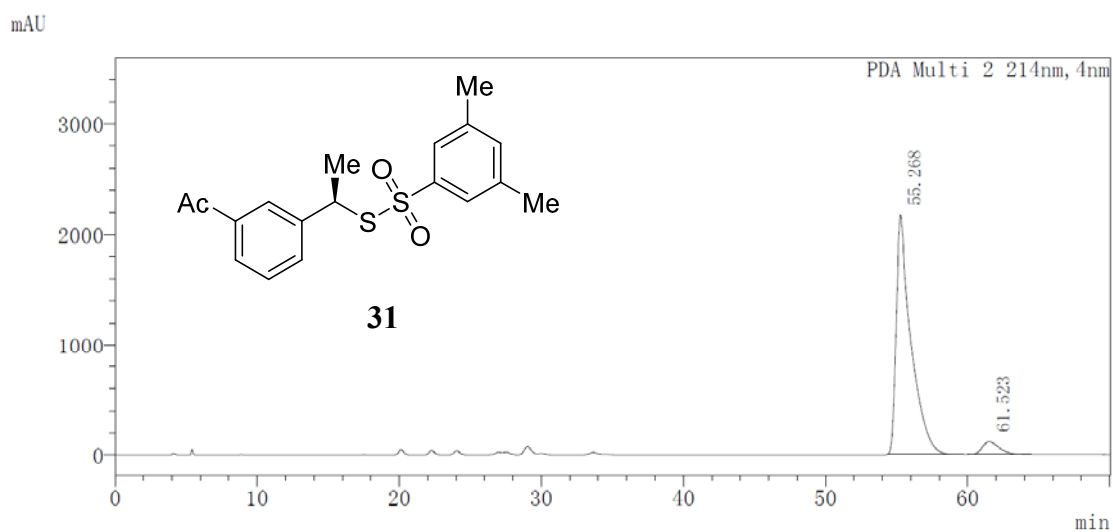

Peak Table

PDA Ch2 214nm

| Peak# | Ret. Time | Area      | Area%  |
|-------|-----------|-----------|--------|
| 1     | 55.268    | 155313083 | 94.276 |
| 2     | 61.523    | 9429281   | 5.724  |

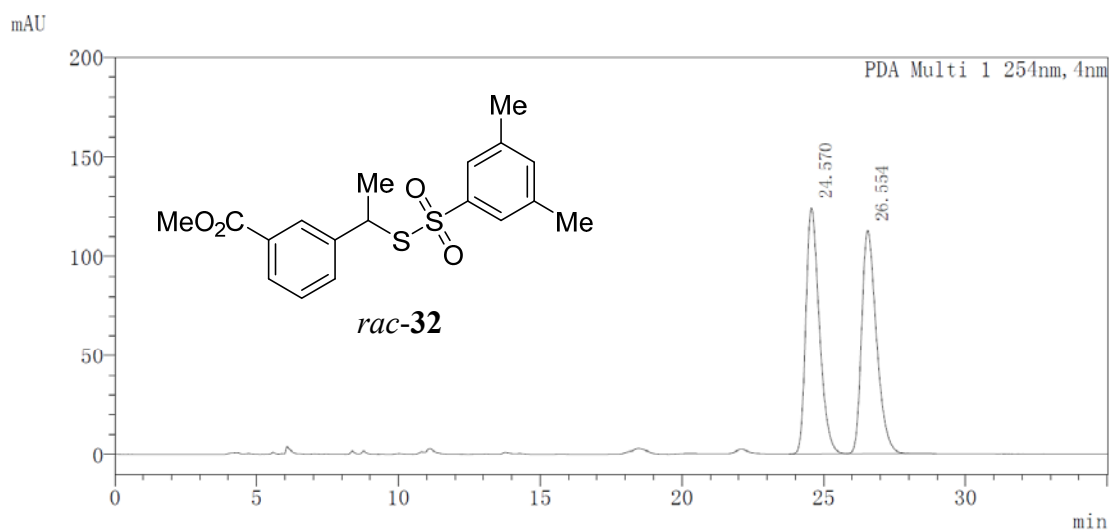

Peak Table

PDA Ch1 254nm

| Peak# | Ret. Time | Area    | Area%  |
|-------|-----------|---------|--------|
| 1     | 24.570    | 4108846 | 50.003 |
| 2     | 26.554    | 4108398 | 49.997 |

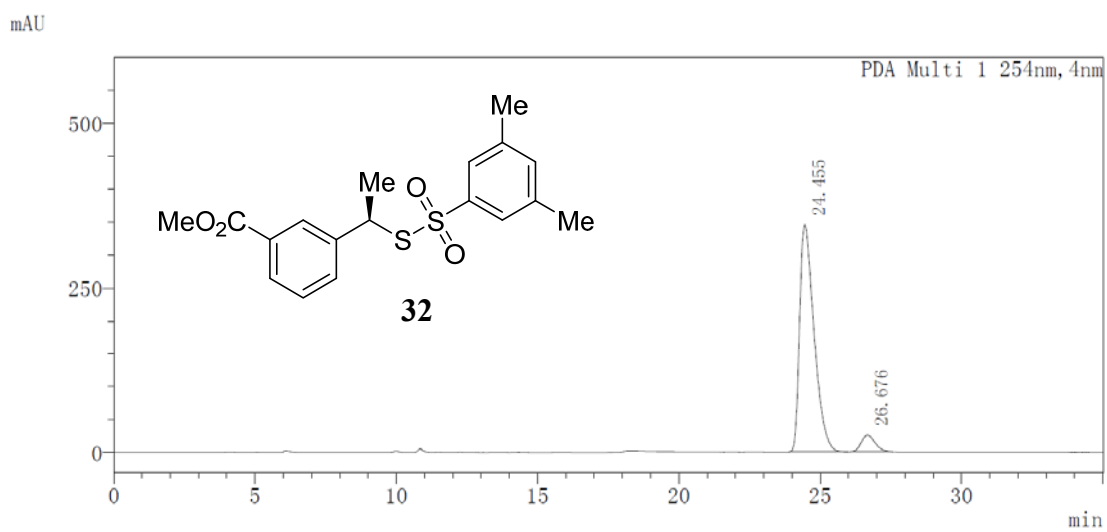

Peak Table

PDA Ch1 254nm

| Peak# | Ret. Time | Area     | Area%  |
|-------|-----------|----------|--------|
| 1     | 24.455    | 12278353 | 93.324 |
| 2     | 26.676    | 878330   | 6.676  |

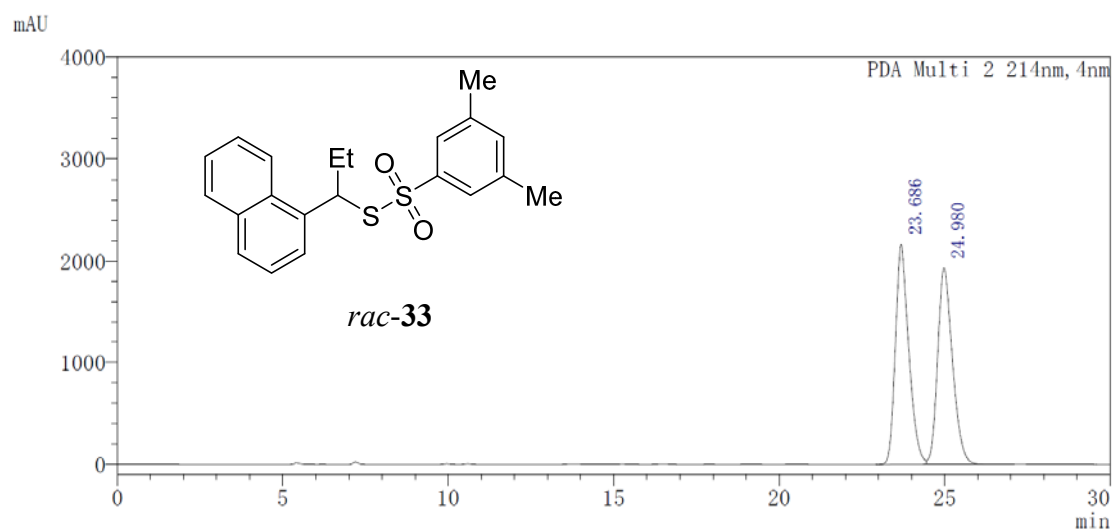

PDA Ch2 214nm

| T      | Hight   | Area     | Area%  |
|--------|---------|----------|--------|
| 23.686 | 2169874 | 60540714 | 50.228 |
| 24.980 | 1935396 | 59991702 | 49.772 |

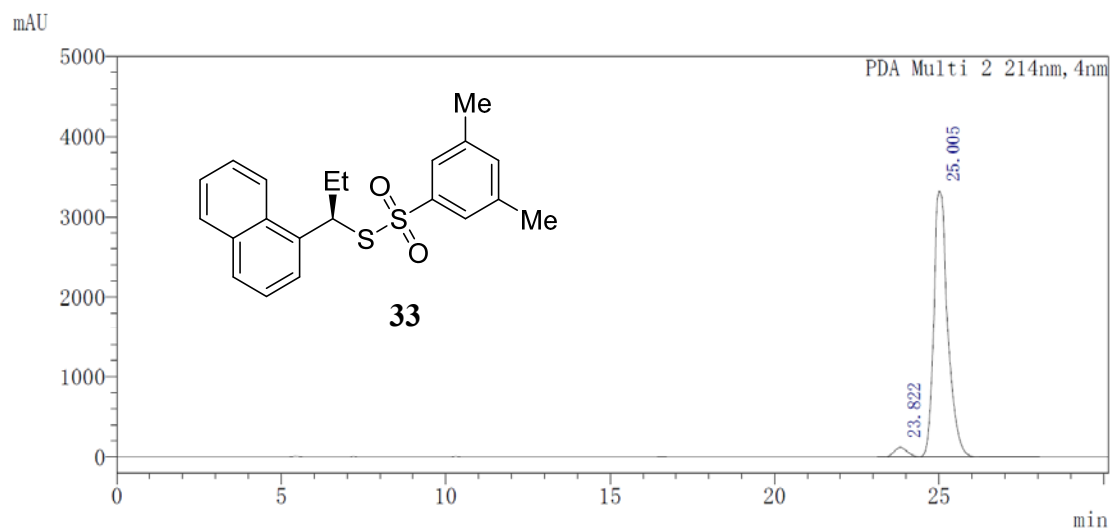

PDA Ch2 214nm

| T      | Hight   | Area     | Area%  |
|--------|---------|----------|--------|
| 23.822 | 116624  | 3327716  | 3.278  |
| 25.005 | 3323083 | 98196349 | 96.722 |

mAU

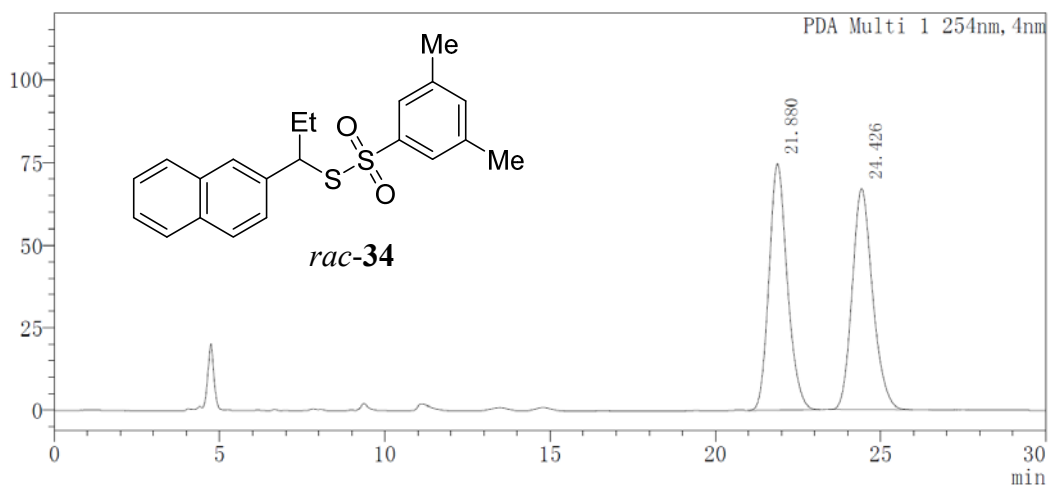

PDA Ch1 254nm

| T      | Hight | Area    | Area%  |
|--------|-------|---------|--------|
| 21.880 | 74501 | 2871647 | 49.886 |
| 24.426 | 66915 | 2884728 | 50.114 |

**34** was prepared from 2-(1-bromopropyl)naphthalene **E31**:

mAU

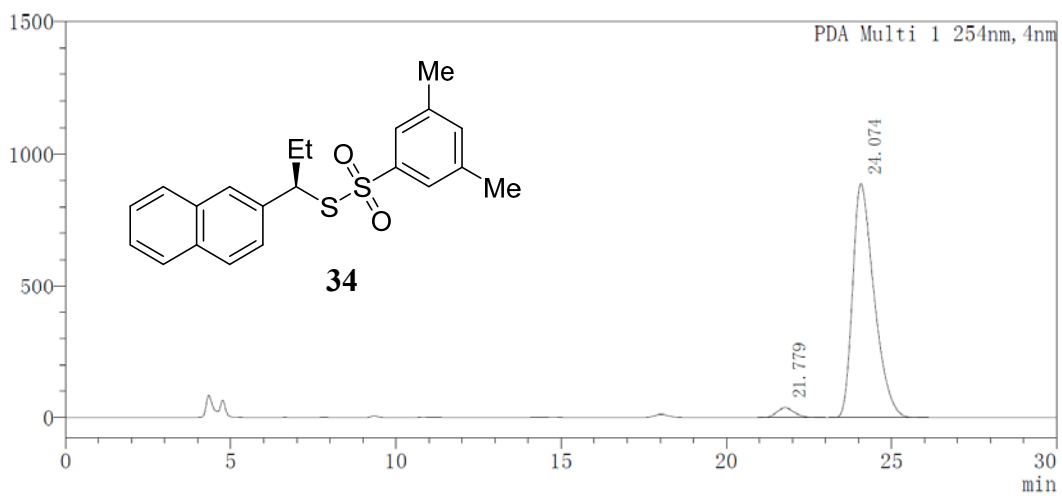

PDA Ch1 254nm

| T      | Hight  | Area     | Area%  |
|--------|--------|----------|--------|
| 21.779 | 37634  | 1424263  | 3.424  |
| 24.074 | 886600 | 40166670 | 96.576 |

**34** was prepared from 2-(1-chloropropyl)naphthalene **E36**:

mAU

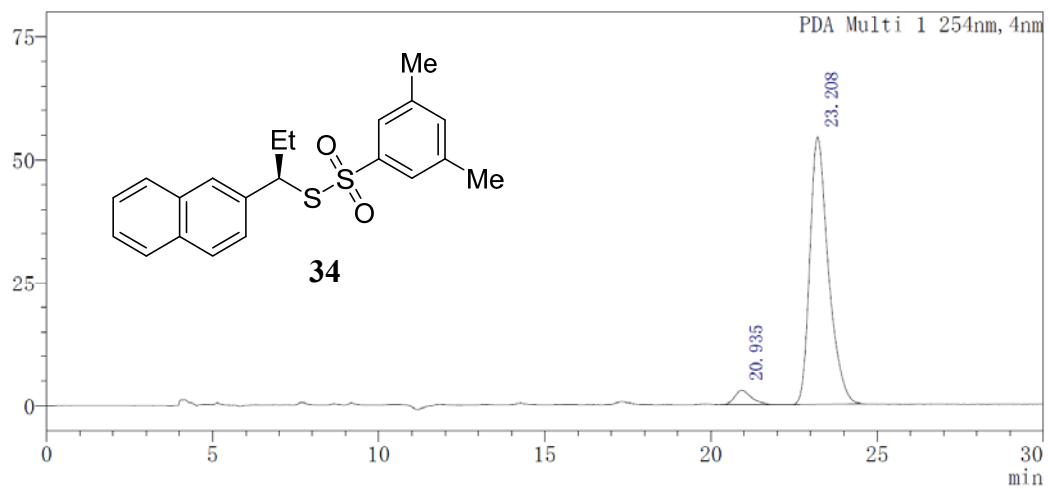

PDA Ch1 254nm

| T      | Hight | Area    | Area%  |
|--------|-------|---------|--------|
| 20.935 | 2880  | 99940   | 4.526  |
| 23.208 | 54349 | 2108424 | 95.474 |



mAU

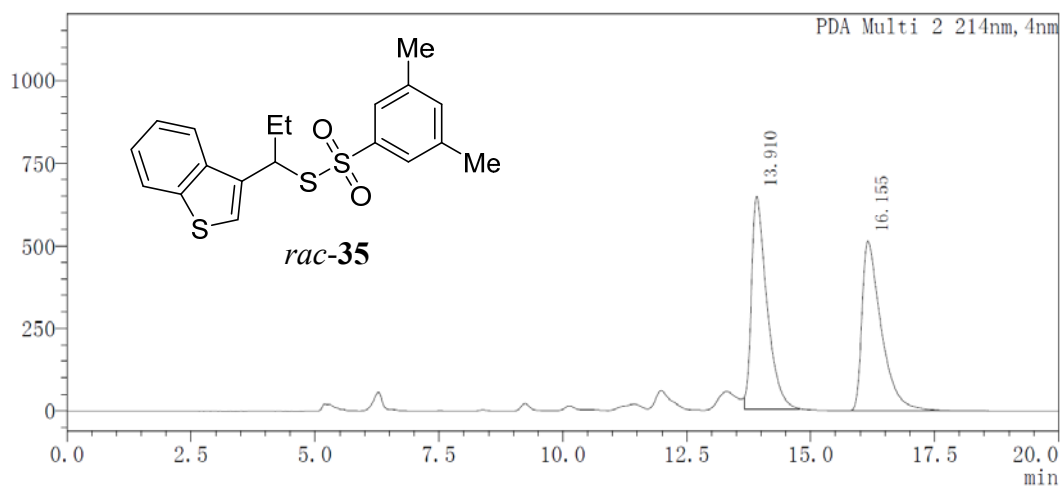

PDA Ch2 214nm

| T      | Hight  | Area     | Area%  |
|--------|--------|----------|--------|
| 13.910 | 644298 | 13988049 | 50.290 |
| 16.155 | 513572 | 13826774 | 49.710 |

mAU

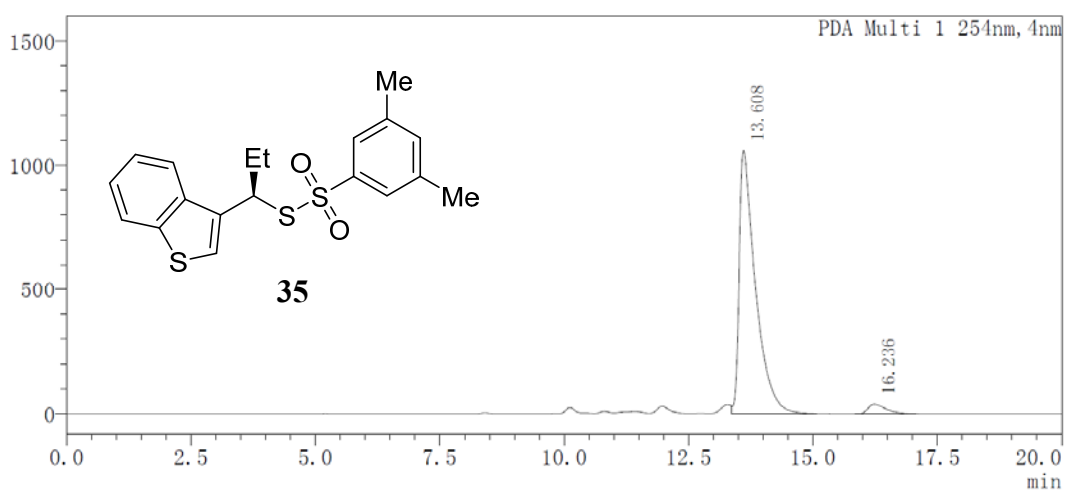

PDA Ch1 254nm

| T      | Hight   | Area     | Area%  |
|--------|---------|----------|--------|
| 13.608 | 1059304 | 24112620 | 96.053 |
| 16.236 | 39716   | 990840   | 3.947  |

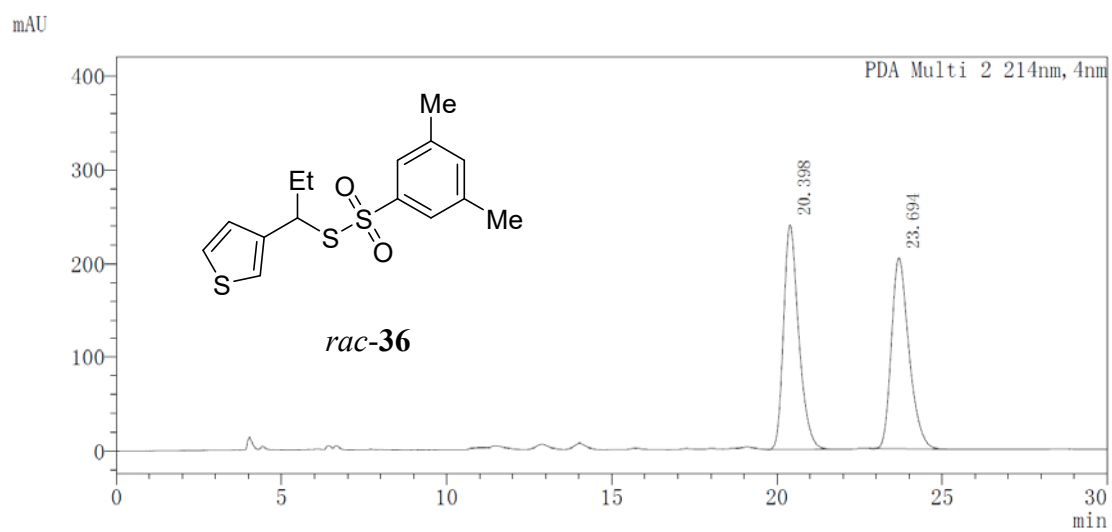

PDA Ch2 214nm

| T      | Hight  | Area    | Area%  |
|--------|--------|---------|--------|
| 20.398 | 237844 | 7572426 | 50.309 |
| 23.694 | 202687 | 7479463 | 49.691 |

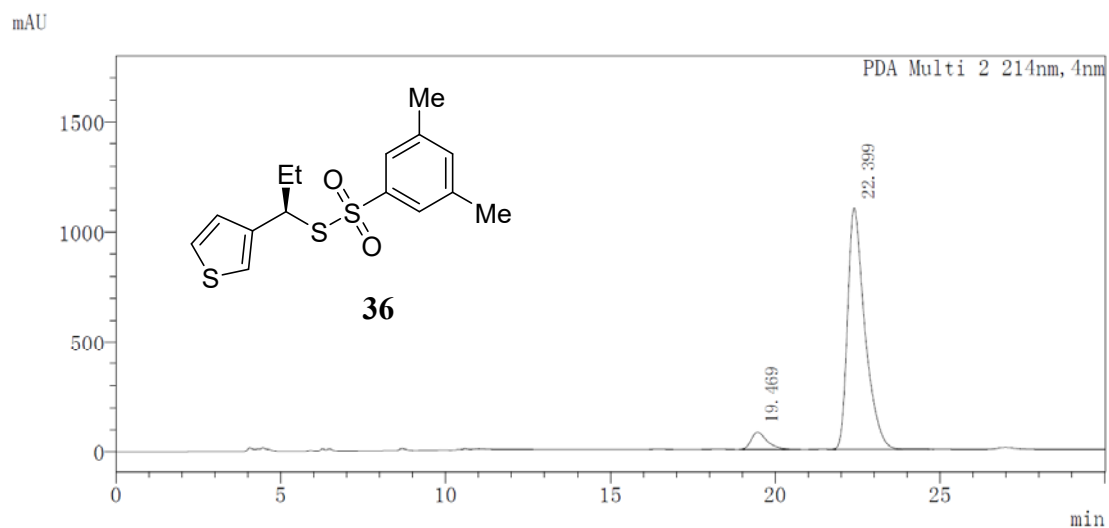

Peak Table

PDA Ch2 214nm

| Peak# | Ret. Time | Area     | Area%  |
|-------|-----------|----------|--------|
| 1     | 19.469    | 2622476  | 6.140  |
| 2     | 22.399    | 40090585 | 93.860 |

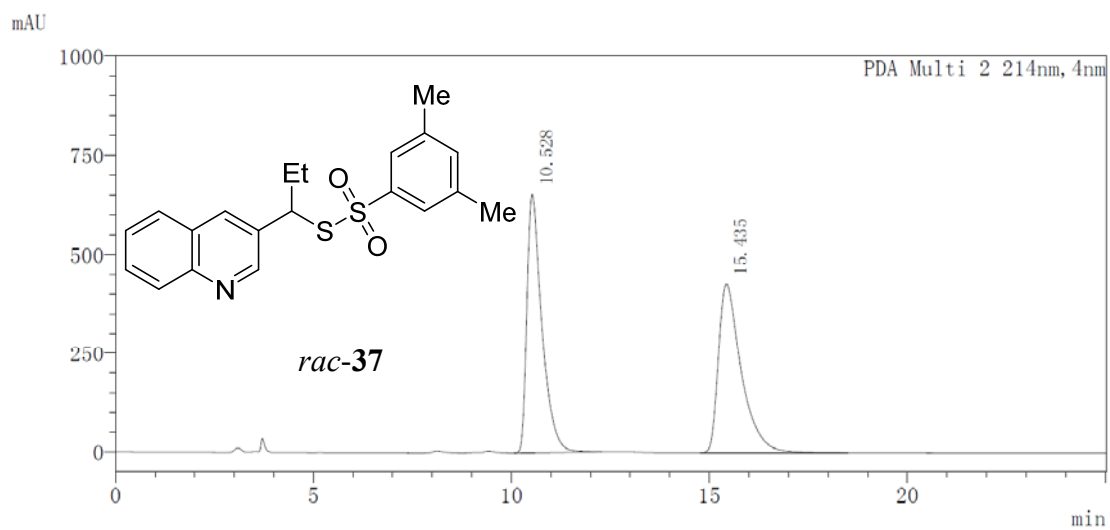

Peak Table

PDA Ch2 214nm

| Peak# | Ret. Time | Area     | Area%  |
|-------|-----------|----------|--------|
| 1     | 10.528    | 17233364 | 50.095 |
| 2     | 15.435    | 17168042 | 49.905 |

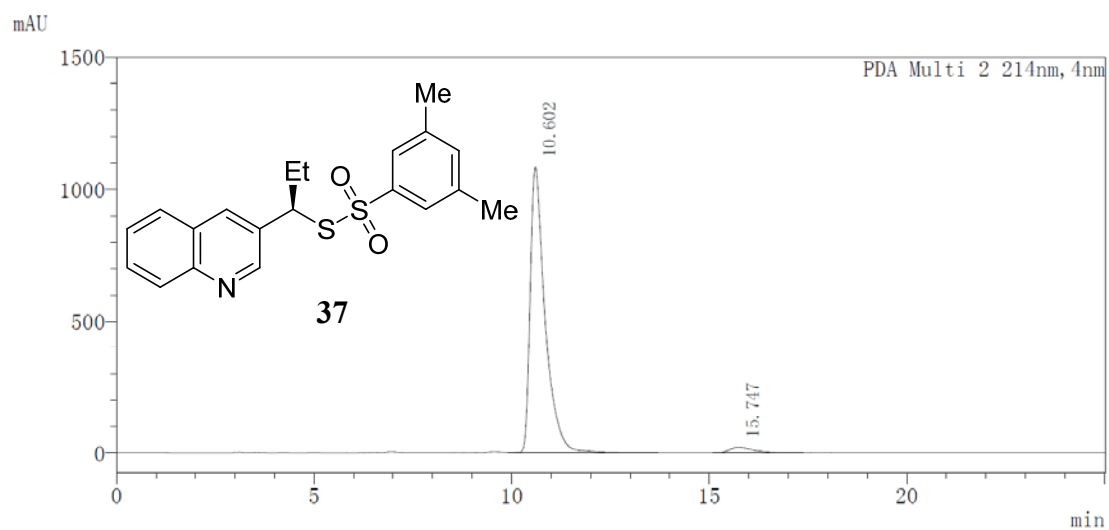

Peak Table

PDA Ch2 214nm

| Peak# | Ret. Time | Area     | Area%  |
|-------|-----------|----------|--------|
| 1     | 10.602    | 28366142 | 97.183 |
| 2     | 15.747    | 822199   | 2.817  |

mAU

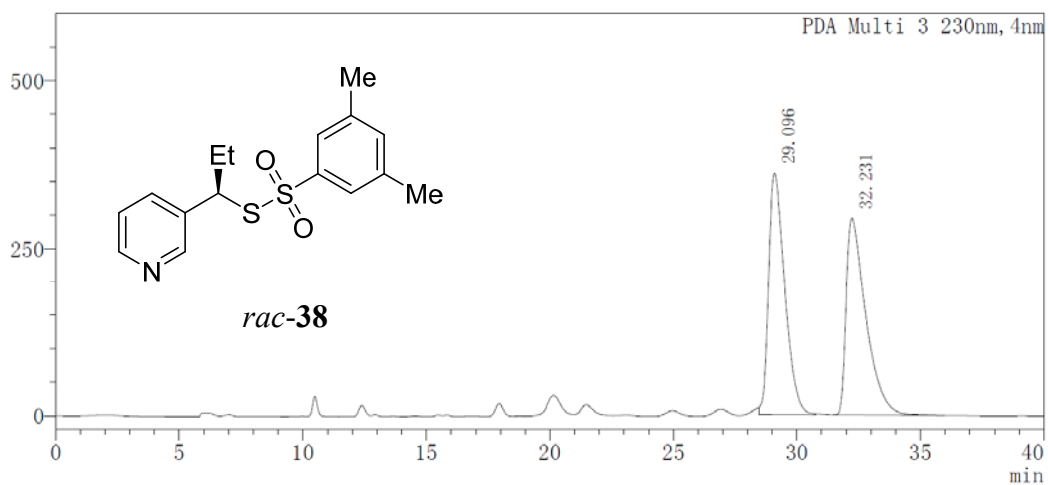

PDA Ch3 230nm

| T      | Hight  | Area     | Area%  |
|--------|--------|----------|--------|
| 29.096 | 360919 | 16416962 | 50.079 |
| 32.231 | 294449 | 16365268 | 49.921 |

mAU

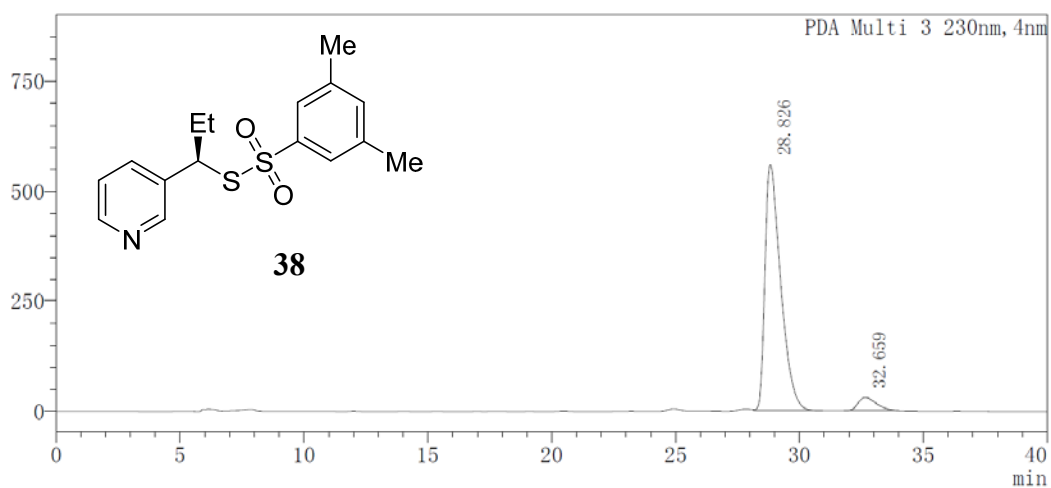

PDA Ch3 230nm

| T      | Hight  | Area     | Area%  |
|--------|--------|----------|--------|
| 28.826 | 559048 | 24716240 | 94.004 |
| 32.659 | 30352  | 1576603  | 5.996  |

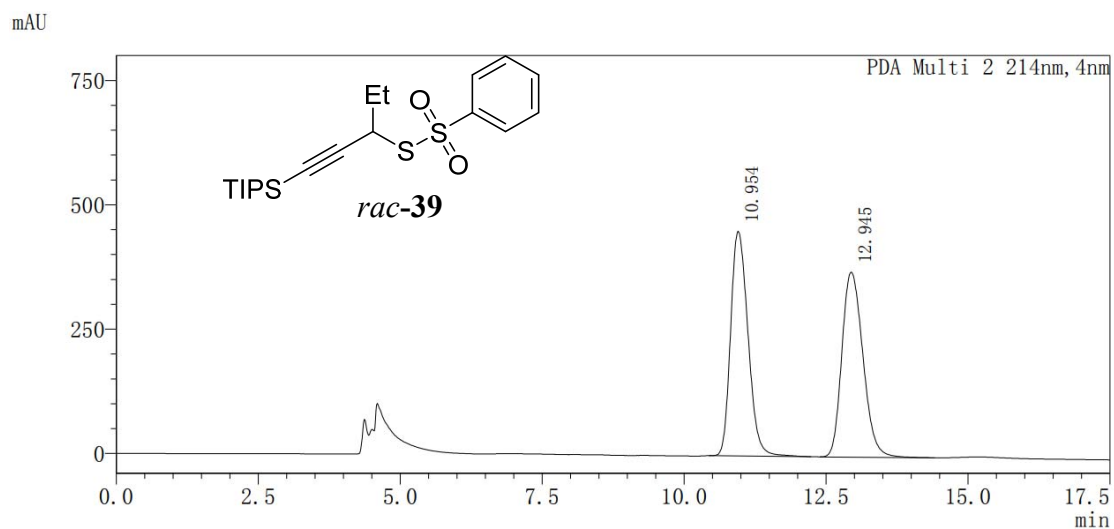

Peak Table

PDA Ch2 214nm

| Peak# | Ret. Time | Area    | Area%  |
|-------|-----------|---------|--------|
| 1     | 10.954    | 9626412 | 50.015 |
| 2     | 12.945    | 9620560 | 49.985 |

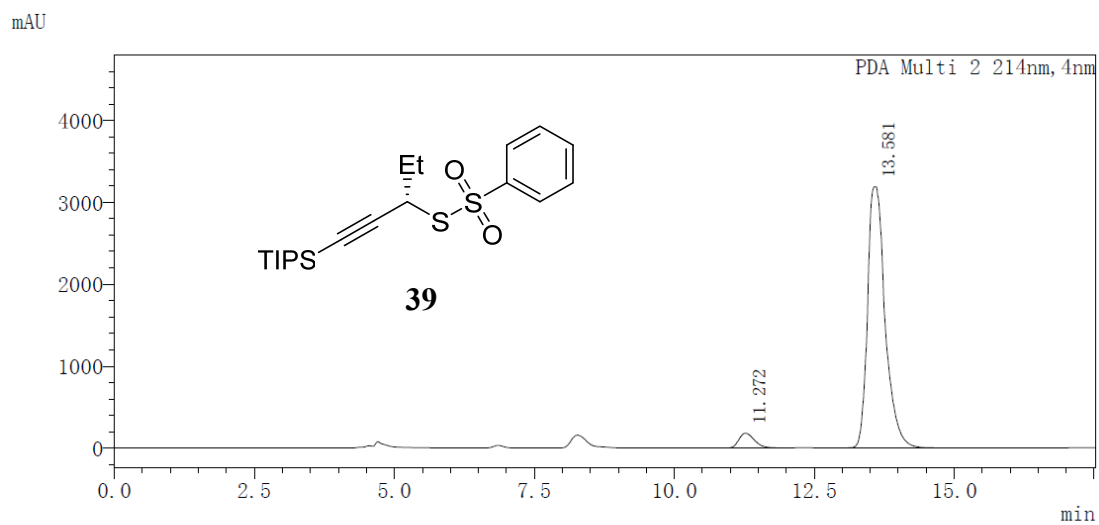

Peak Table

PDA Ch2 214nm

| Peak# | Ret. Time | Area     | Area%  |
|-------|-----------|----------|--------|
| 1     | 11.272    | 3495492  | 4.786  |
| 2     | 13.581    | 69535203 | 95.214 |

mAU

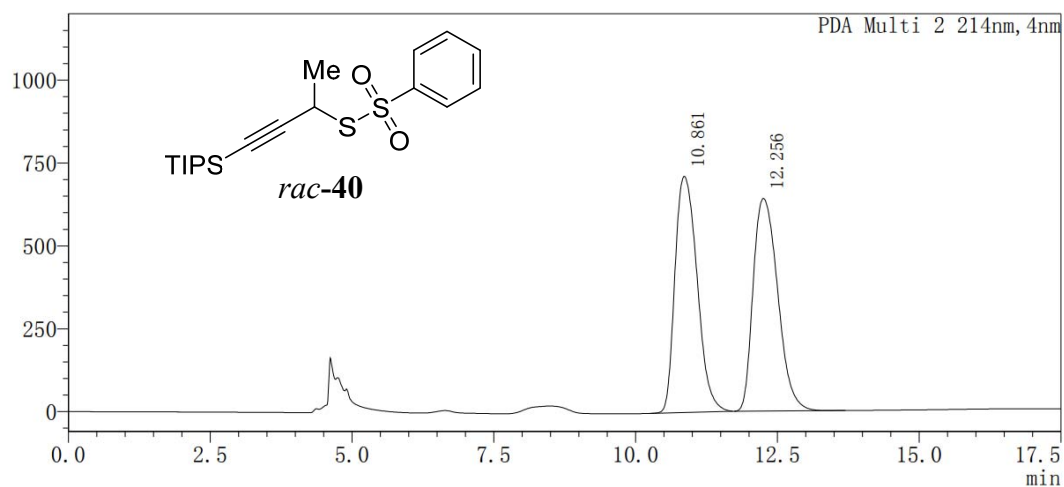

Peak Table

PDA Ch2 214nm

| Peak# | Ret. Time | Area     | Area%  |
|-------|-----------|----------|--------|
| 1     | 10.861    | 19373455 | 50.003 |
| 2     | 12.256    | 19371001 | 49.997 |

mAU

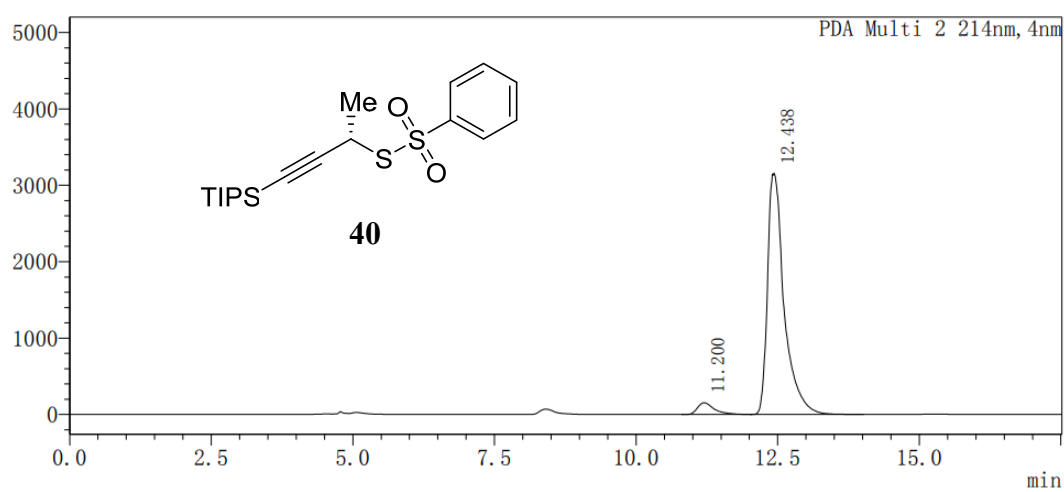

Peak Table

PDA Ch2 214nm

| Peak# | Ret. Time | Area     | Area%  |
|-------|-----------|----------|--------|
| 1     | 11.200    | 3172138  | 4.701  |
| 2     | 12.438    | 64300973 | 95.299 |

mAU

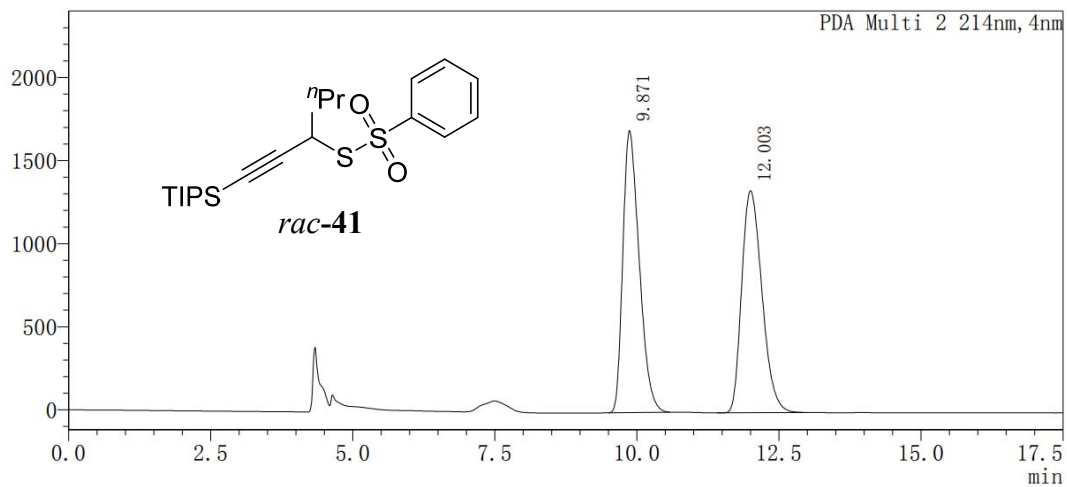

Peak Table

PDA Ch2 214nm

| Peak# | Ret. Time | Area     | Area%  |
|-------|-----------|----------|--------|
| 1     | 9.871     | 33951911 | 50.567 |
| 2     | 12.003    | 33190654 | 49.433 |

mAU

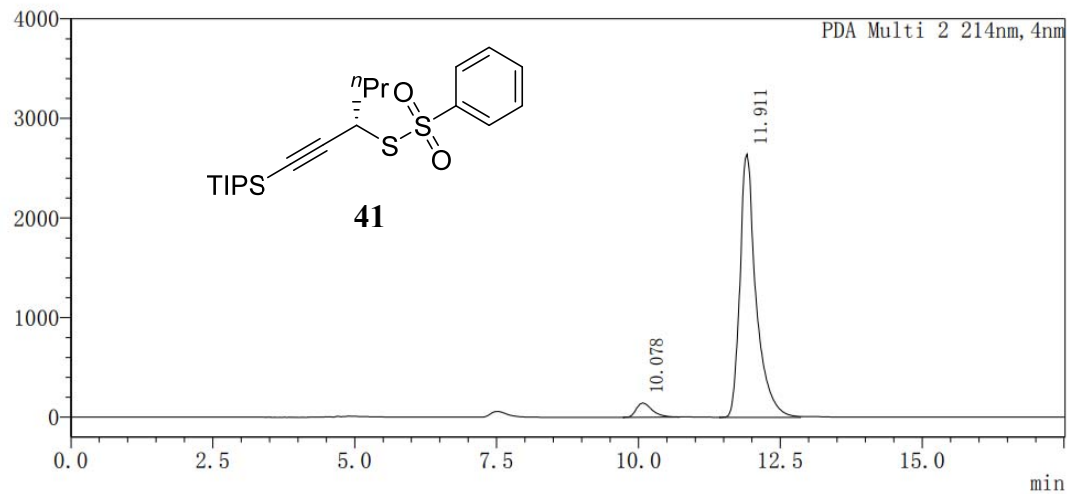

Peak Table

PDA Ch2 214nm

| Peak# | Ret. Time | Area     | Area%  |
|-------|-----------|----------|--------|
| 1     | 10.078    | 2753426  | 5.002  |
| 2     | 11.911    | 52288905 | 94.998 |

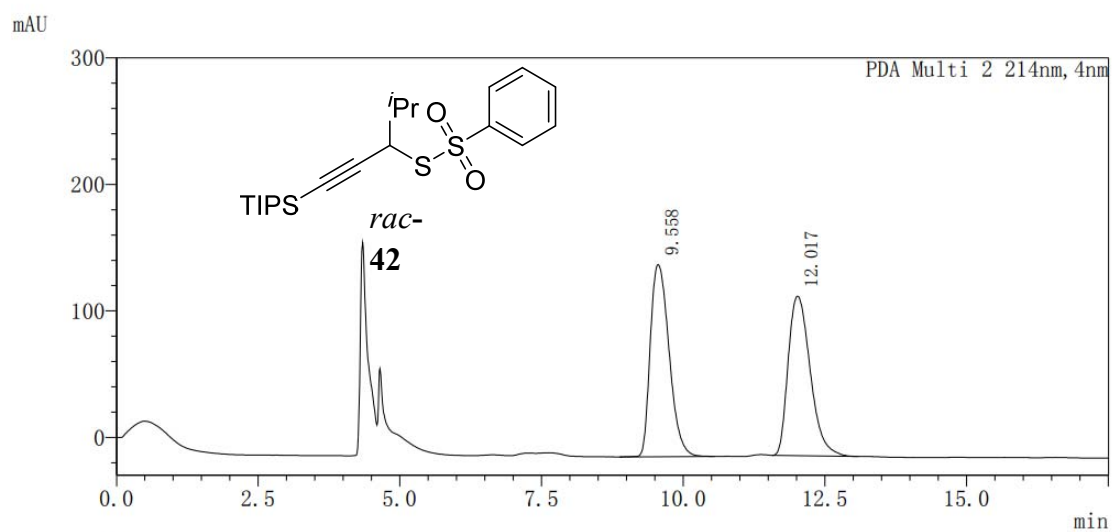

Peak Table

PDA Ch2 214nm

| Peak# | Ret. Time | Area    | Area%  |
|-------|-----------|---------|--------|
| 1     | 9.558     | 3512670 | 50.646 |
| 2     | 12.017    | 3423118 | 49.354 |

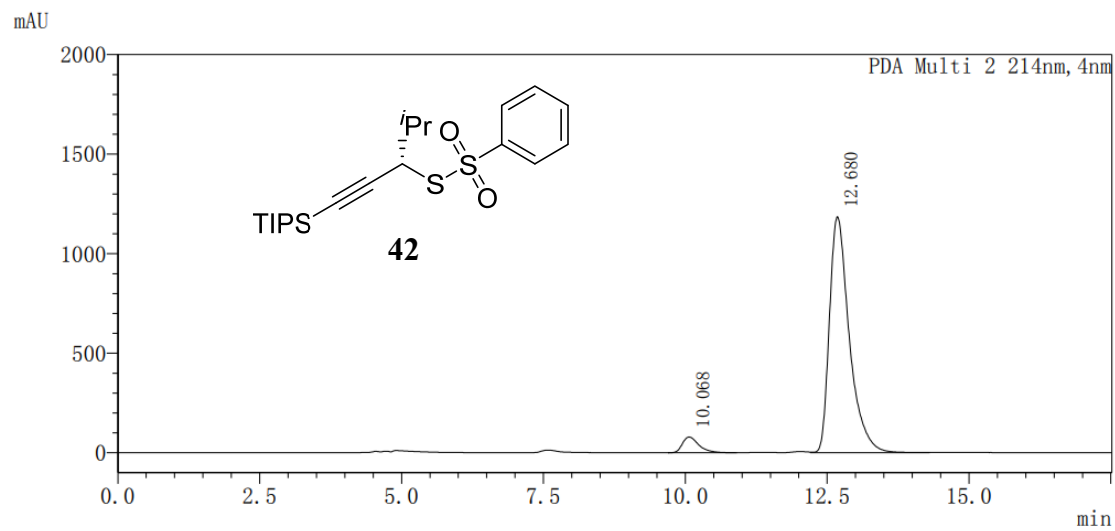

Peak Table

PDA Ch2 214nm

| Peak# | Ret. Time | Area     | Area%  |
|-------|-----------|----------|--------|
| 1     | 10.068    | 1585805  | 5.197  |
| 2     | 12.680    | 28928937 | 94.803 |



mAU

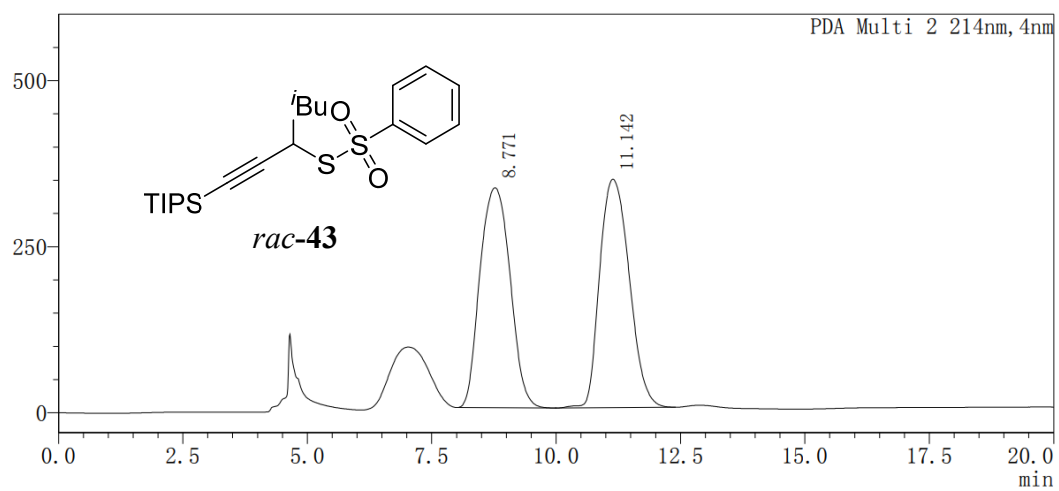

PDA Ch2 214nm

| T      | Hight  | Area     | Area%  |
|--------|--------|----------|--------|
| 8.771  | 331172 | 14016254 | 49.583 |
| 11.142 | 343906 | 14252136 | 50.417 |

mAU

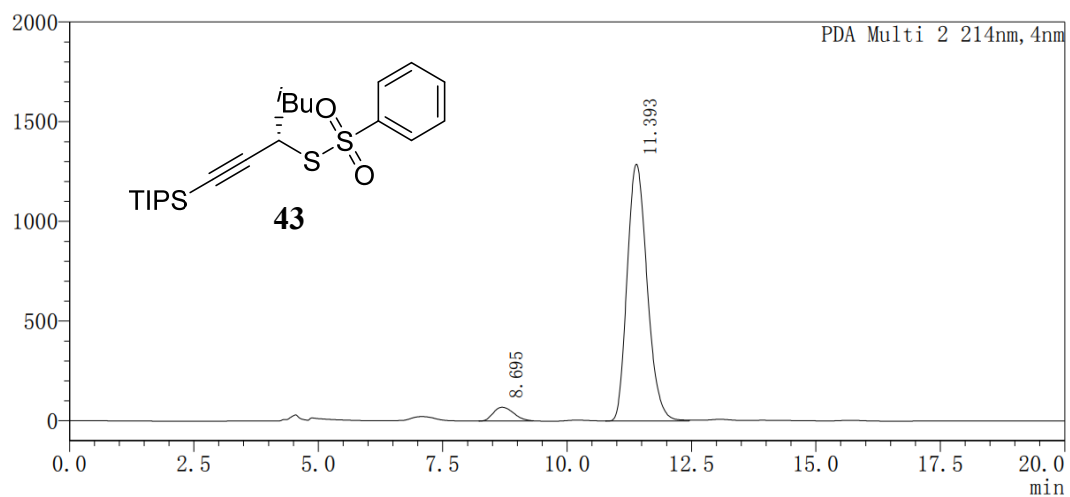

PDA Ch2 214nm

| T      | Hight   | Area     | Area%  |
|--------|---------|----------|--------|
| 8.695  | 68697   | 1949392  | 5.126  |
| 11.393 | 1288459 | 36081745 | 94.874 |

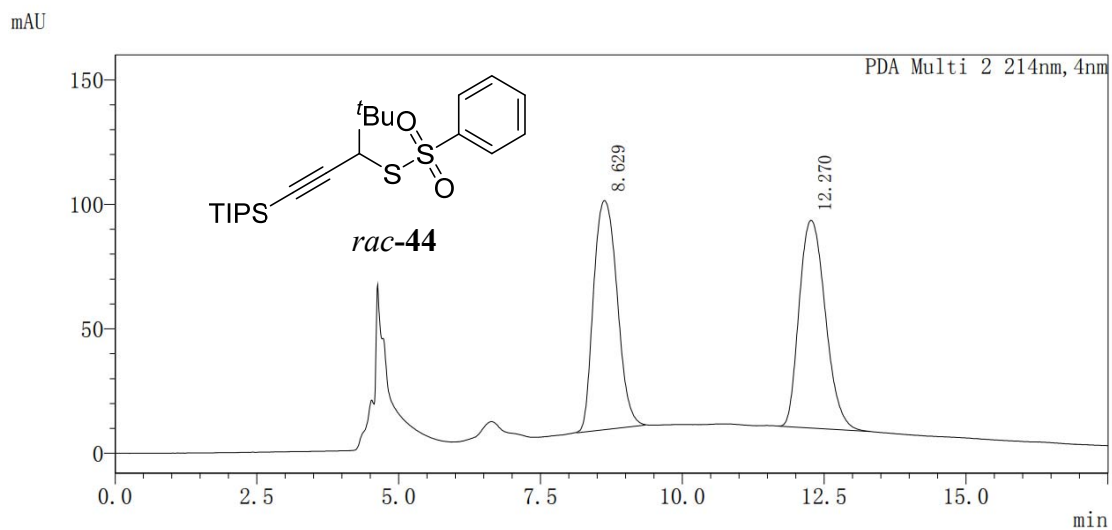

Peak Table

PDA Ch2 214nm

| Peak# | Ret. Time | Area    | Area%  |
|-------|-----------|---------|--------|
| 1     | 8.629     | 2666770 | 49.781 |
| 2     | 12.270    | 2690278 | 50.219 |

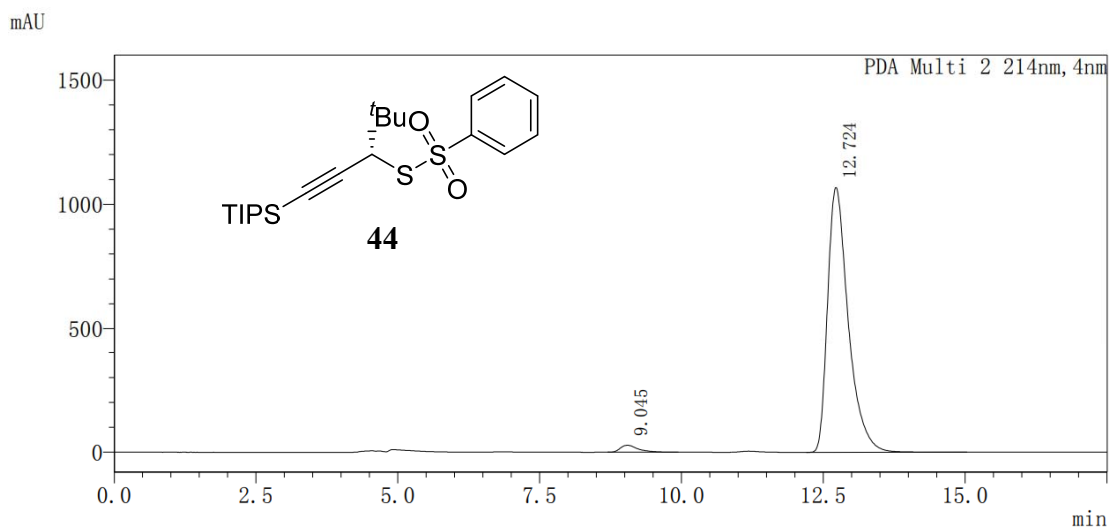

Peak Table

PDA Ch2 214nm

| Peak# | Ret. Time | Area     | Area%  |
|-------|-----------|----------|--------|
| 1     | 9.045     | 612506   | 2.208  |
| 2     | 12.724    | 27133258 | 97.792 |

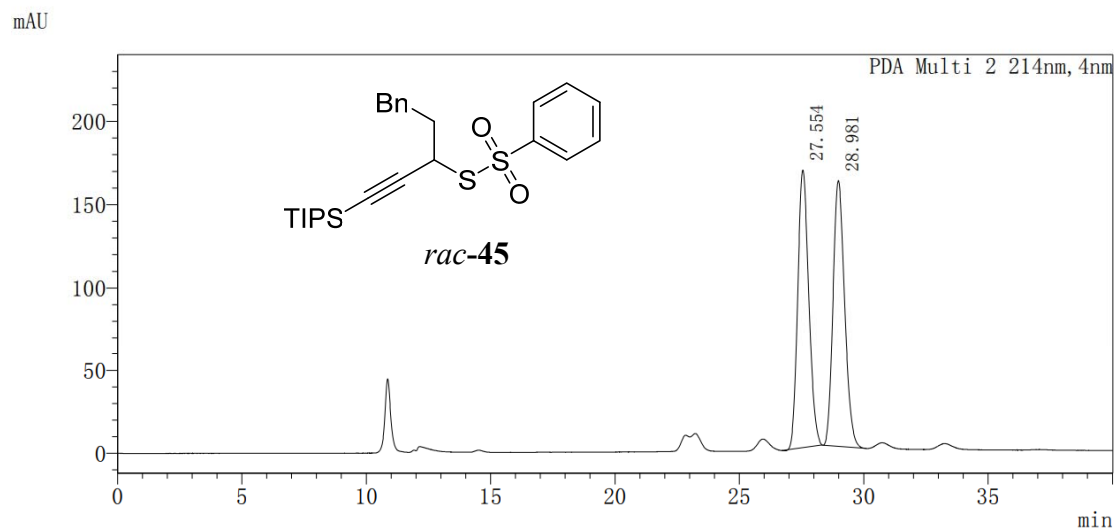

Peak Table

PDA Ch2 214nm

| Peak# | Ret. Time | Area    | Area%  |
|-------|-----------|---------|--------|
| 1     | 27.554    | 5176525 | 49.878 |
| 2     | 28.981    | 5201761 | 50.122 |

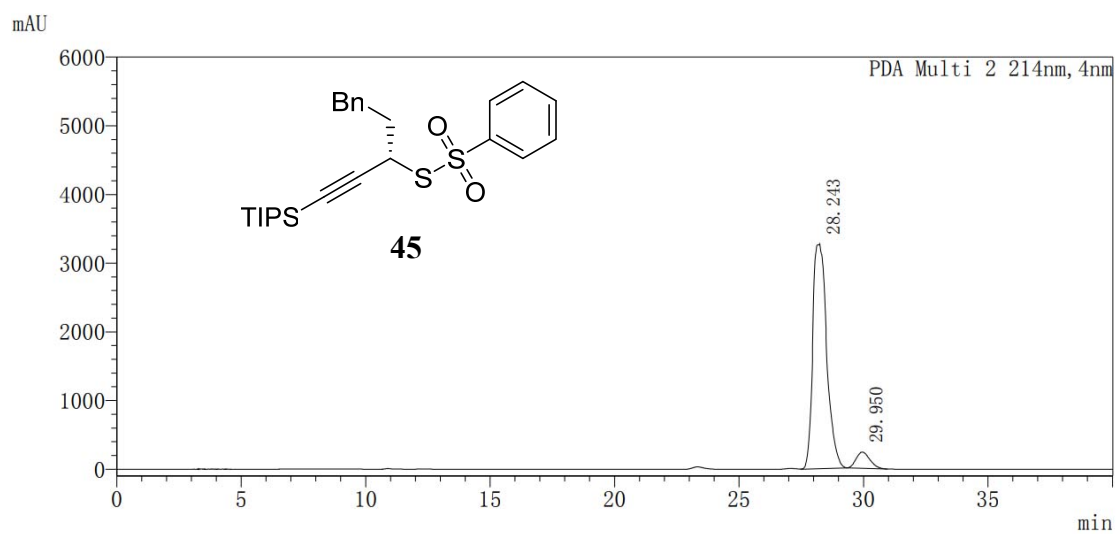

Peak Table

PDA Ch2 214nm

| Peak# | Ret. Time | Area      | Area%  |
|-------|-----------|-----------|--------|
| 1     | 28.243    | 127945881 | 93.363 |
| 2     | 29.950    | 9095280   | 6.637  |

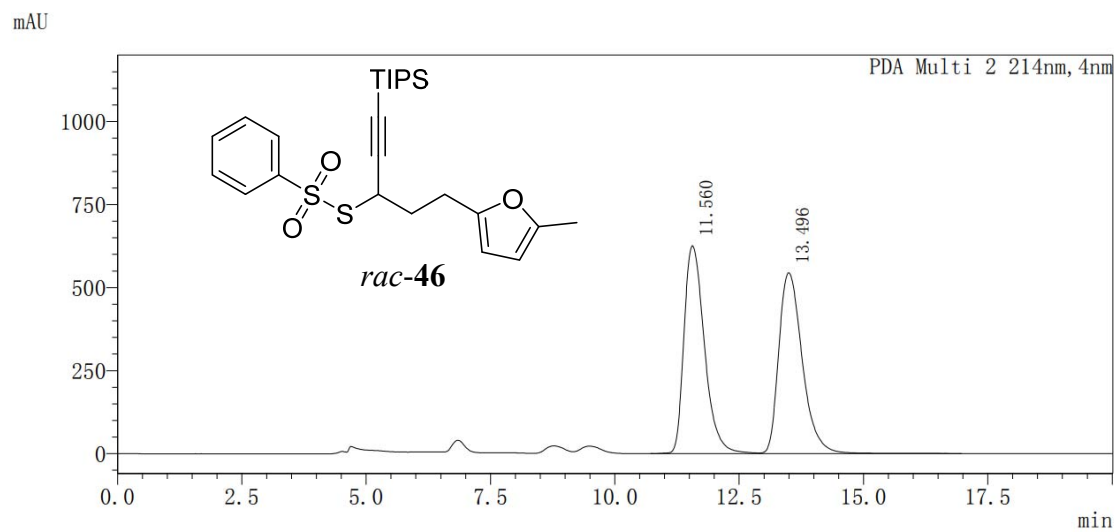

Peak Table

PDA Ch2 214nm

| Peak# | Ret. Time | Area     | Area%  |
|-------|-----------|----------|--------|
| 1     | 11.560    | 17924527 | 50.023 |
| 2     | 13.496    | 17908287 | 49.977 |

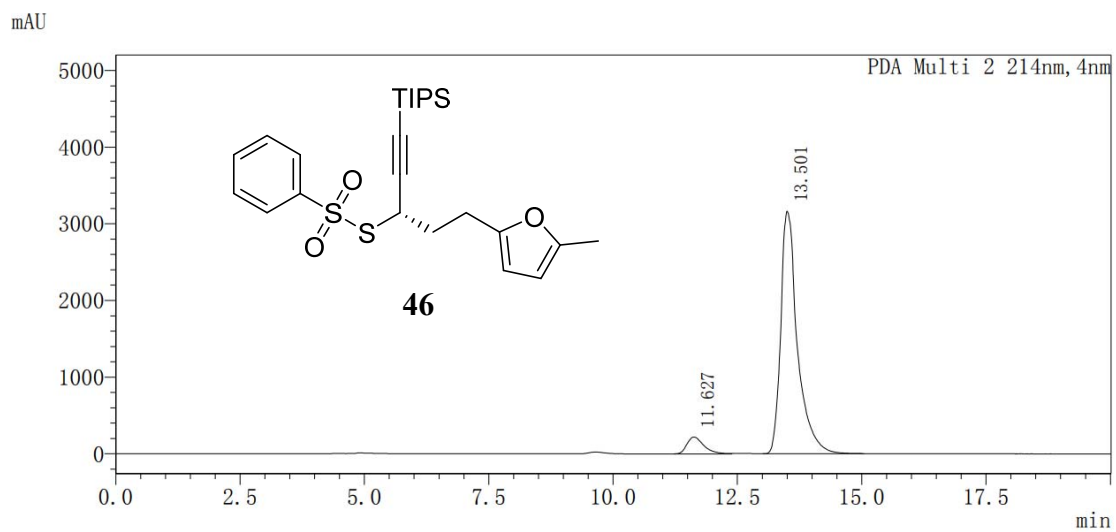

Peak Table

PDA Ch2 214nm

| Peak# | Ret. Time | Area     | Area%  |
|-------|-----------|----------|--------|
| 1     | 11.627    | 5177961  | 6.546  |
| 2     | 13.501    | 73928096 | 93.454 |

mAU

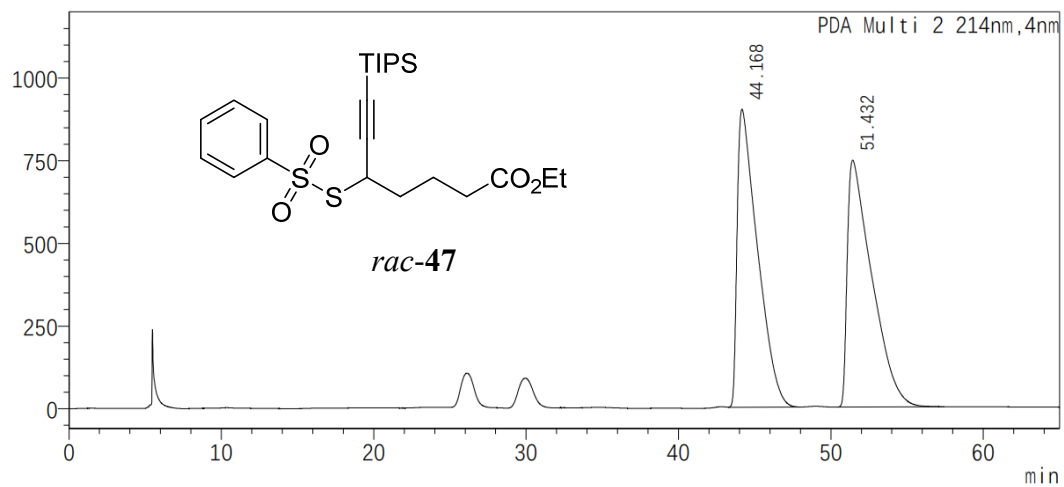

PDA Ch2 214nm

| T      | Hight  | Area     | Area%  |
|--------|--------|----------|--------|
| 44.168 | 901243 | 83368531 | 49.898 |
| 51.432 | 746750 | 83710518 | 50.102 |

mAU

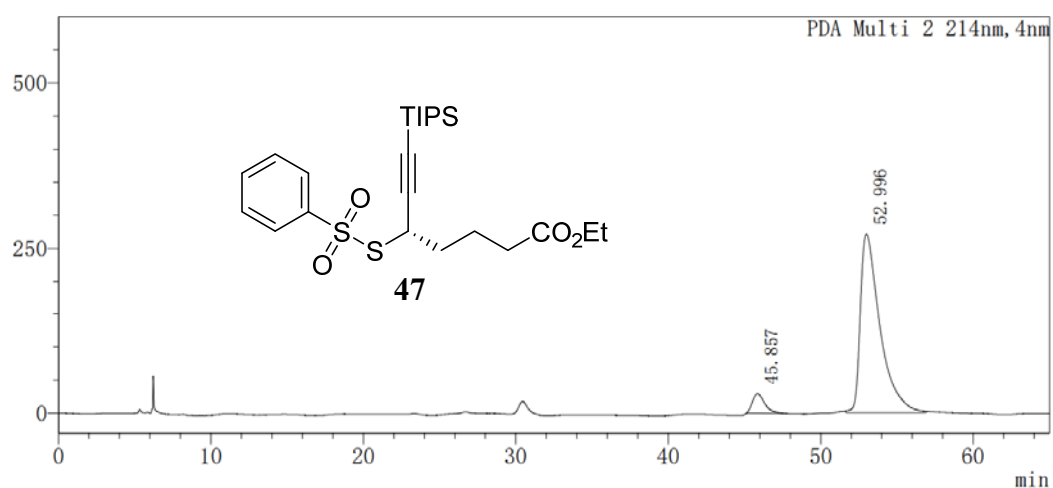

PDA Ch2 214nm

| T      | Hight  | Area     | Area%  |
|--------|--------|----------|--------|
| 45.857 | 29614  | 1663674  | 6.433  |
| 52.996 | 270900 | 24198370 | 93.567 |

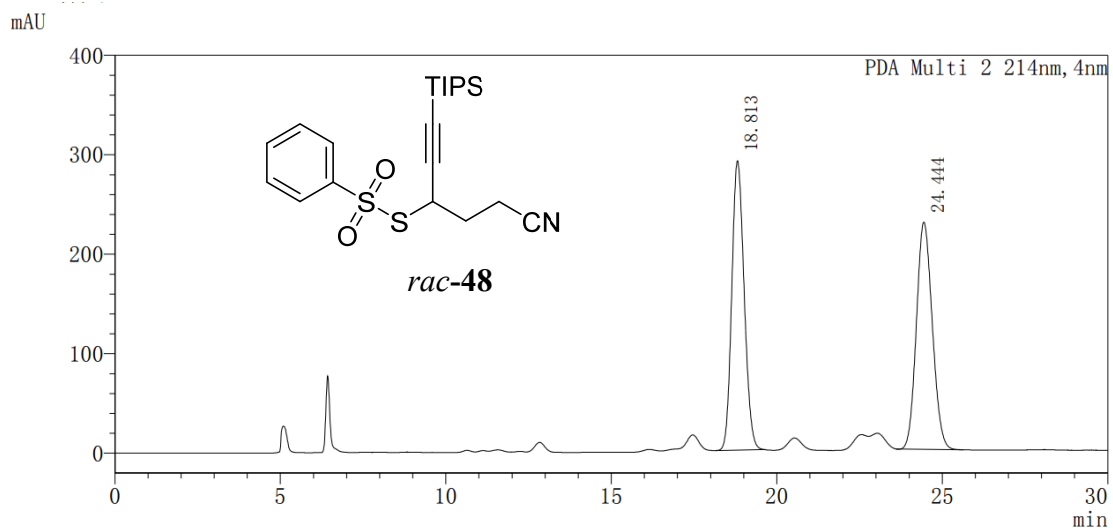

PDA Ch2 214nm

| T      | Hight  | Area    | Area%  |
|--------|--------|---------|--------|
| 18.813 | 290955 | 7555798 | 49.737 |
| 24.444 | 228412 | 7635770 | 50.263 |

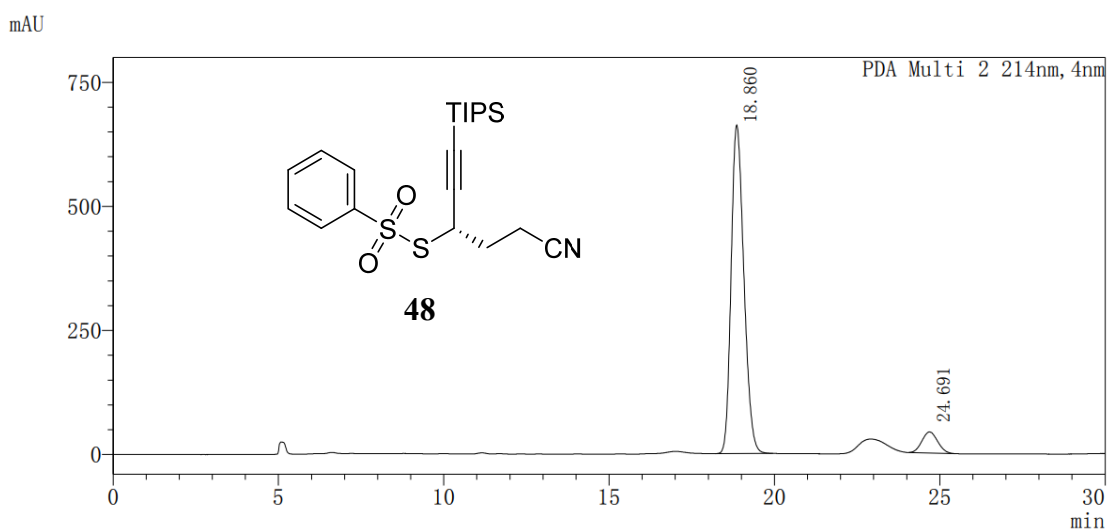

PDA Ch2 214nm

| T      | Hight  | Area     | Area%  |
|--------|--------|----------|--------|
| 18.860 | 661823 | 17748479 | 92.701 |
| 24.691 | 42449  | 1397547  | 7.299  |

mAU

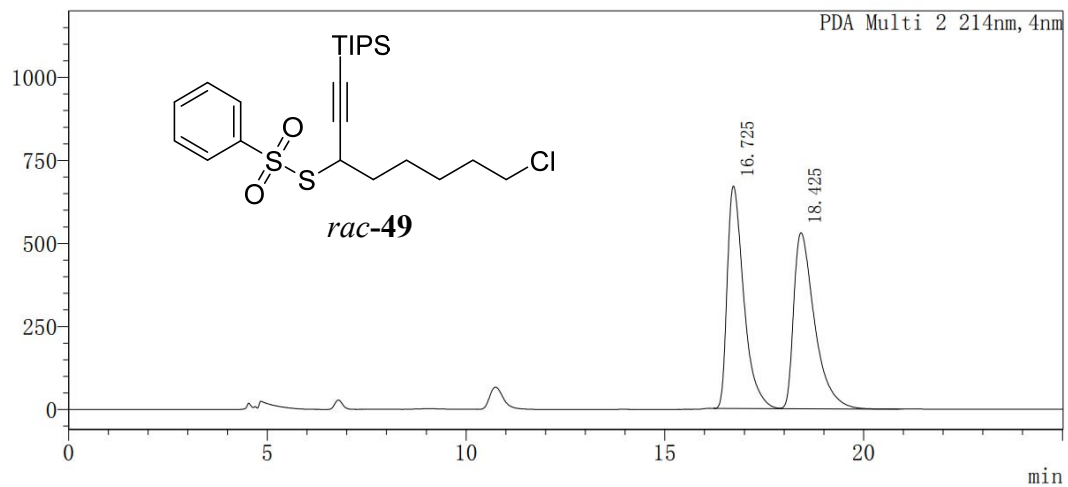

Peak Table

PDA Ch2 214nm

| Peak# | Ret. Time | Area     | Area%  |
|-------|-----------|----------|--------|
| 1     | 16.725    | 19402061 | 50.019 |
| 2     | 18.425    | 19387302 | 49.981 |

mAU

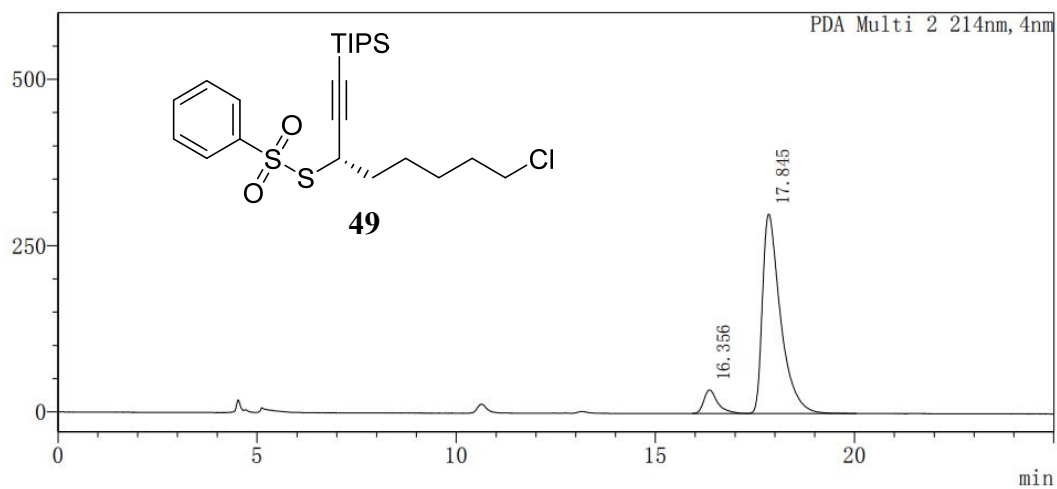

Peak Table

PDA Ch2 214nm

| Peak# | Ret. Time | Area    | Area%  |
|-------|-----------|---------|--------|
| 1     | 16.356    | 850585  | 8.239  |
| 2     | 17.845    | 9472794 | 91.761 |

mAU

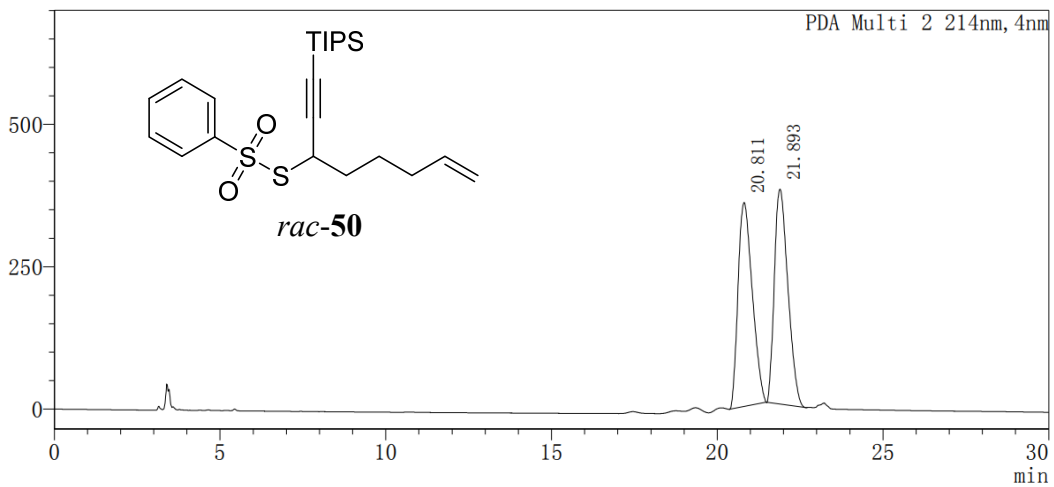

PDA Ch2 214nm

| T      | Hight  | Area     | Area%  |
|--------|--------|----------|--------|
| 20.811 | 357940 | 10691955 | 49.859 |
| 21.893 | 376878 | 10752490 | 50.141 |

mAU

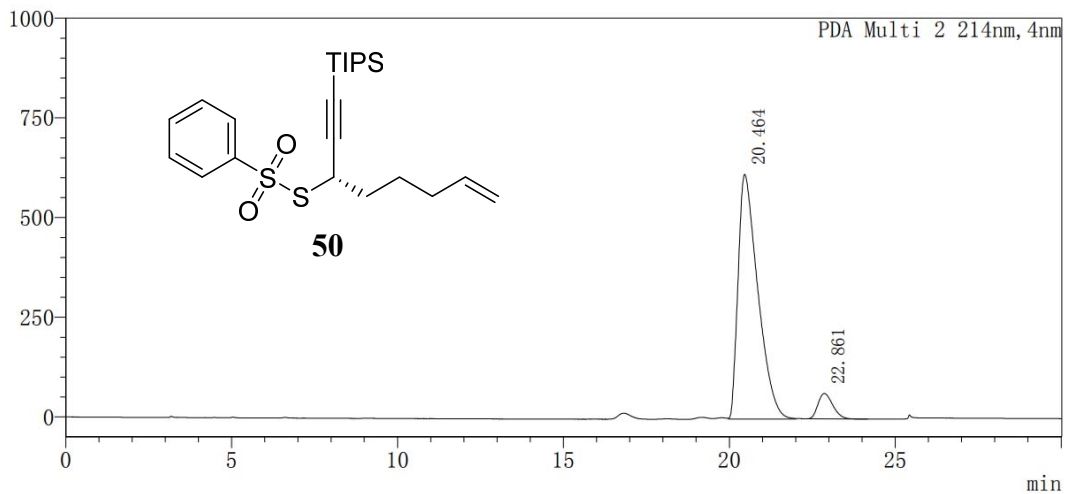

Peak Table

PDA Ch2 214nm

| Peak# | Ret. Time | Area     | Area%  |
|-------|-----------|----------|--------|
| 1     | 20.464    | 25422970 | 92.798 |
| 2     | 22.861    | 1972921  | 7.202  |



mAU

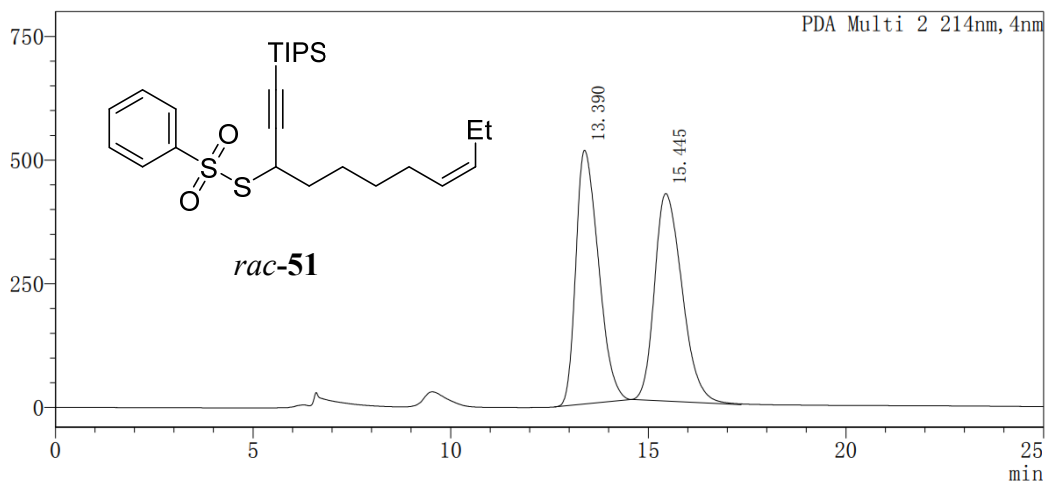

PDA Ch2 214nm

| T      | Hight  | Area     | Area%  |
|--------|--------|----------|--------|
| 13.390 | 513017 | 20440421 | 50.072 |
| 15.445 | 419559 | 20381397 | 49.928 |

mAU

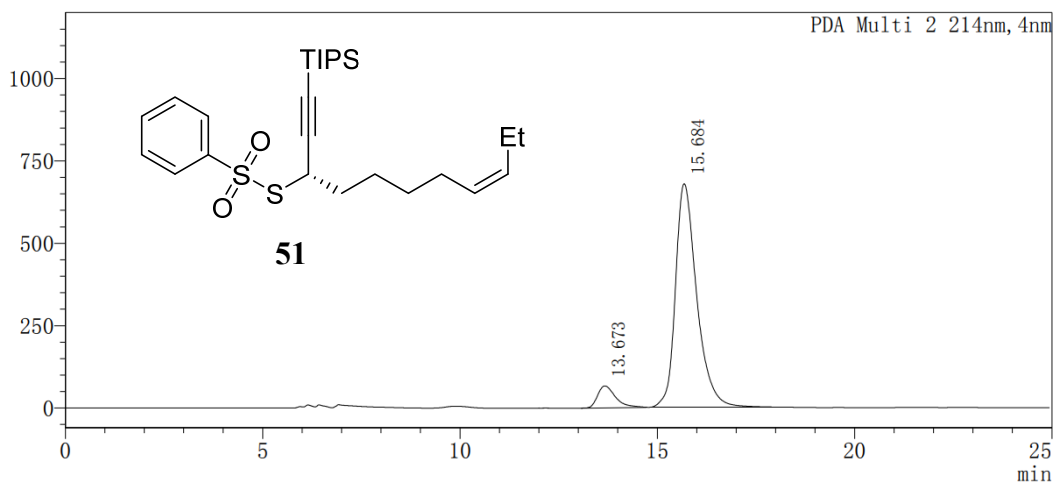

PDA Ch2 214nm

| T      | Hight  | Area     | Area%  |
|--------|--------|----------|--------|
| 13.673 | 66592  | 2100045  | 7.614  |
| 15.684 | 678286 | 25482564 | 92.386 |

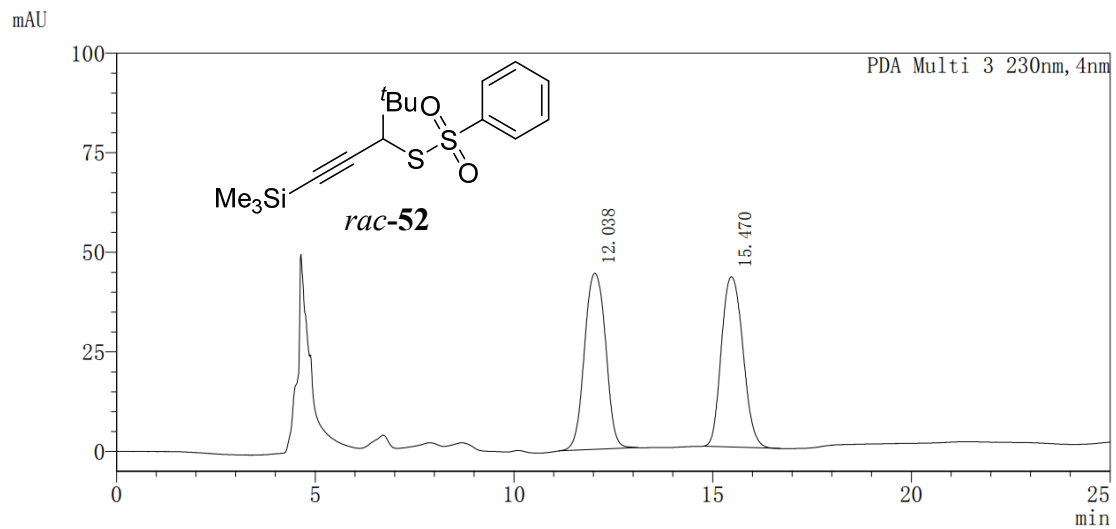

PDA Ch3 230nm

| T      | Hight | Area    | Area%  |
|--------|-------|---------|--------|
| 12.038 | 44204 | 1640057 | 50.342 |
| 15.470 | 42768 | 1617794 | 49.658 |

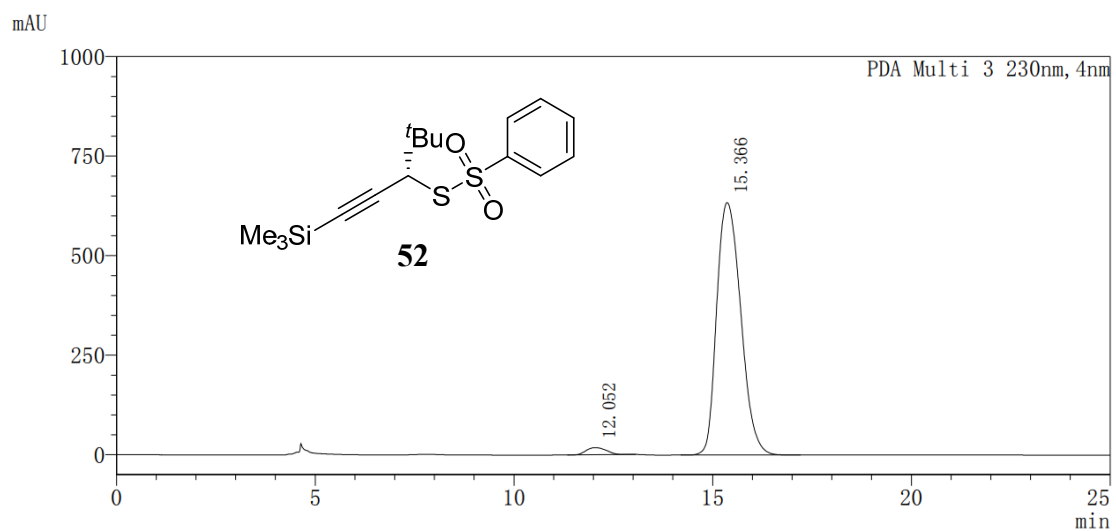

PDA Ch3 230nm

| T      | Hight  | Area     | Area%  |
|--------|--------|----------|--------|
| 12.052 | 17915  | 637380   | 2.327  |
| 15.366 | 634269 | 26750181 | 97.673 |

mAU

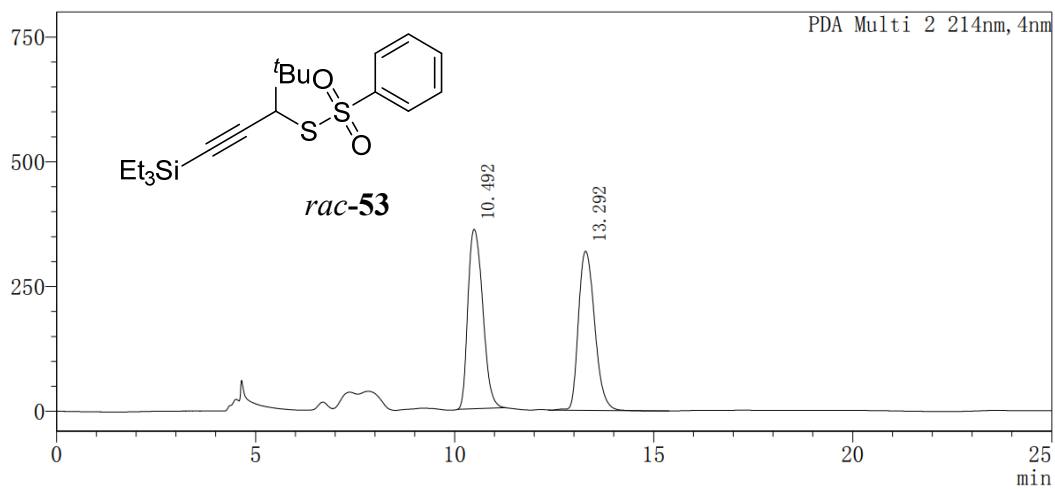

PDA Ch2 214nm

| T      | Hight  | Area    | Area%  |
|--------|--------|---------|--------|
| 10.492 | 359414 | 9298040 | 50.642 |
| 13.292 | 318856 | 9062274 | 49.358 |

mAU

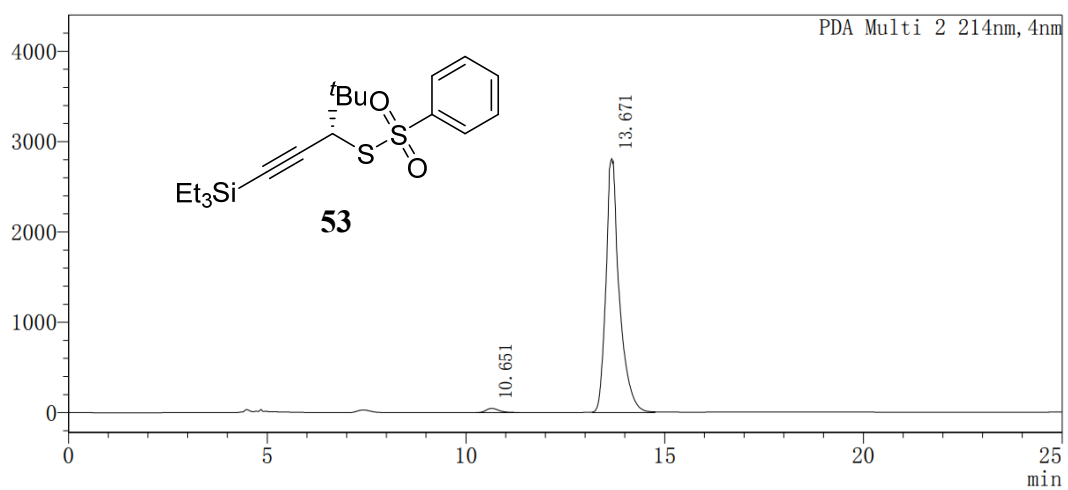

PDA Ch2 214nm

| T      | Hight   | Area     | Area%  |
|--------|---------|----------|--------|
| 10.651 | 46725   | 1041140  | 1.554  |
| 13.671 | 2808470 | 65961398 | 98.446 |

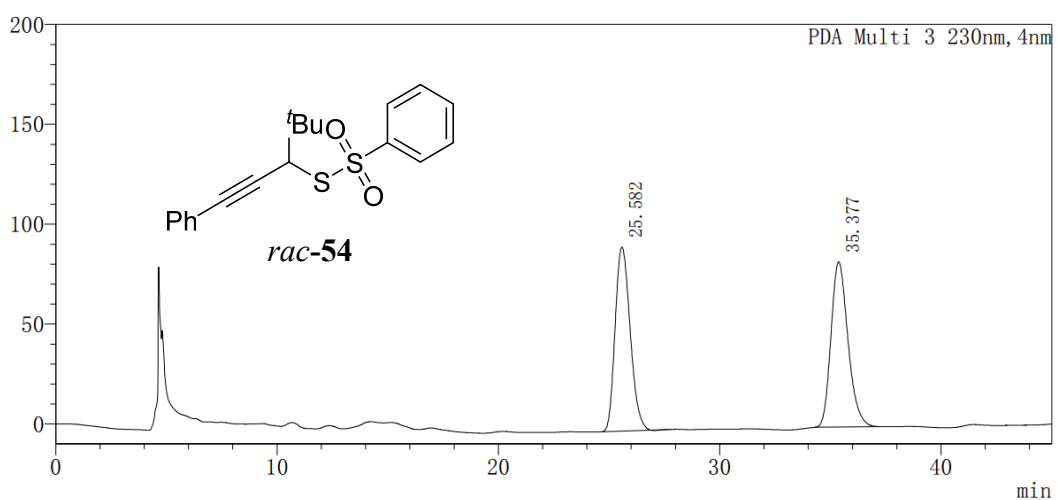

PDA Ch3 230nm

| T      | Hight | Area    | Area%  |
|--------|-------|---------|--------|
| 25.582 | 92158 | 4341491 | 49.614 |
| 35.377 | 82723 | 4409126 | 50.386 |

mAU

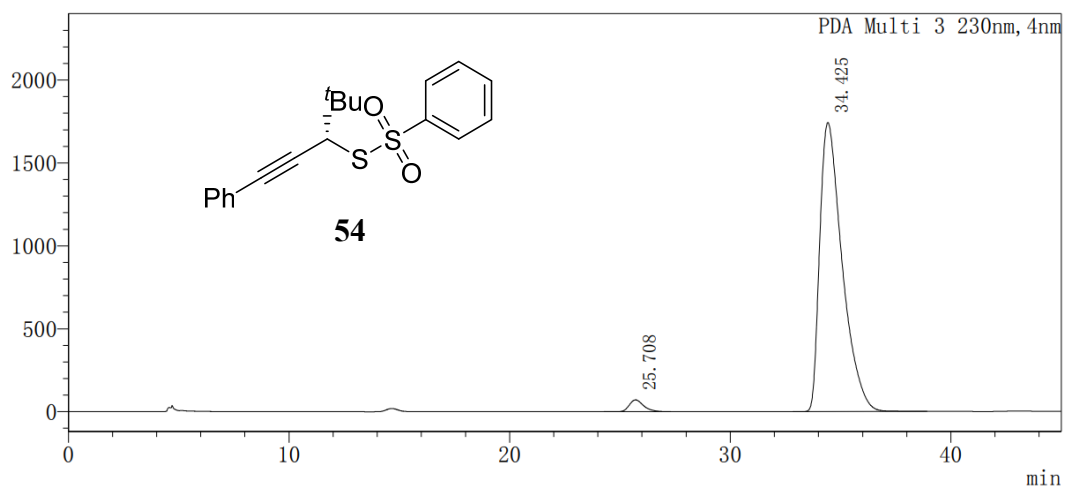

PDA Ch3 230nm

| T      | Hight   | Area      | Area%  |
|--------|---------|-----------|--------|
| 25.708 | 71352   | 3233865   | 2.557  |
| 34.425 | 1743639 | 123239984 | 97.443 |

mAU

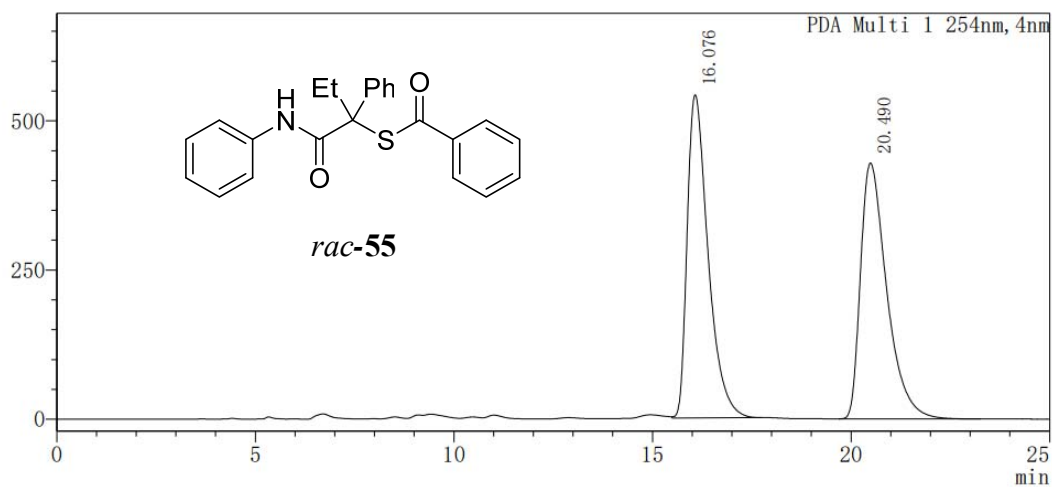

Peak Table

PDA Ch1 254nm

| Peak# | Ret. Time | Area     | Area%  |
|-------|-----------|----------|--------|
| 1     | 16.076    | 19840907 | 50.170 |
| 2     | 20.490    | 19706629 | 49.830 |

mAU

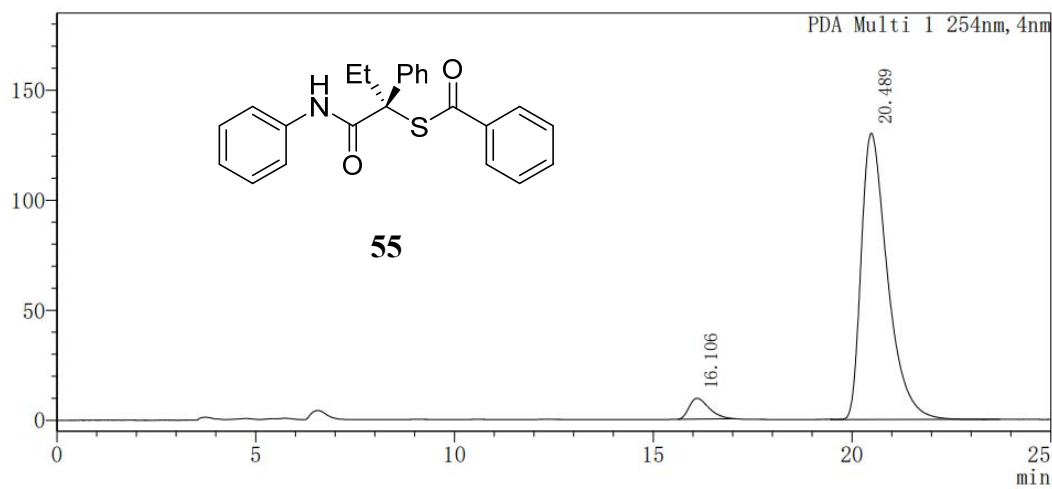

Peak Table

PDA Ch1 254nm

| Peak# | Ret. Time | Area    | Area%  |
|-------|-----------|---------|--------|
| 1     | 16.106    | 325087  | 5.148  |
| 2     | 20.489    | 5989633 | 94.852 |

mAU

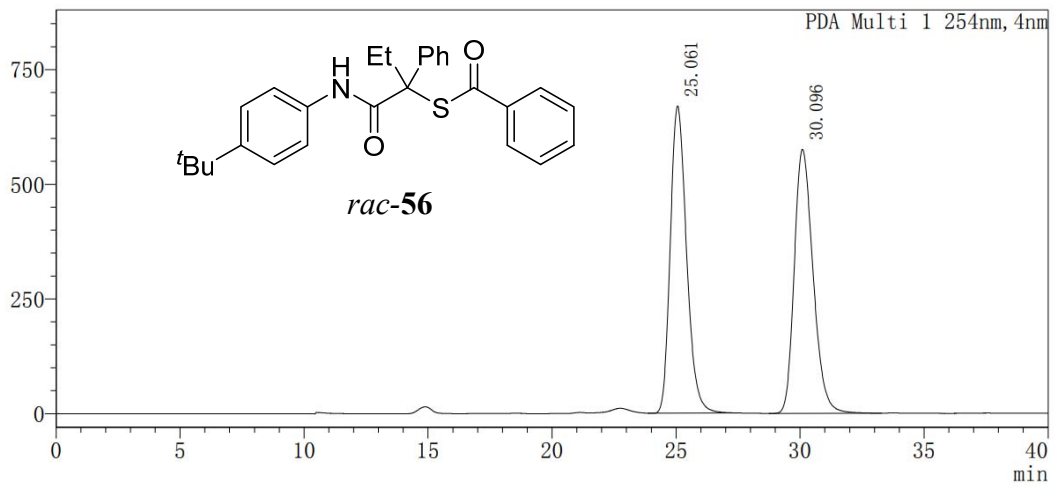

Peak Table

PDA Ch1 254nm

| Peak# | Ret. Time | Area     | Area%  |
|-------|-----------|----------|--------|
| 1     | 25.061    | 30562400 | 50.145 |
| 2     | 30.096    | 30386015 | 49.855 |

mAU

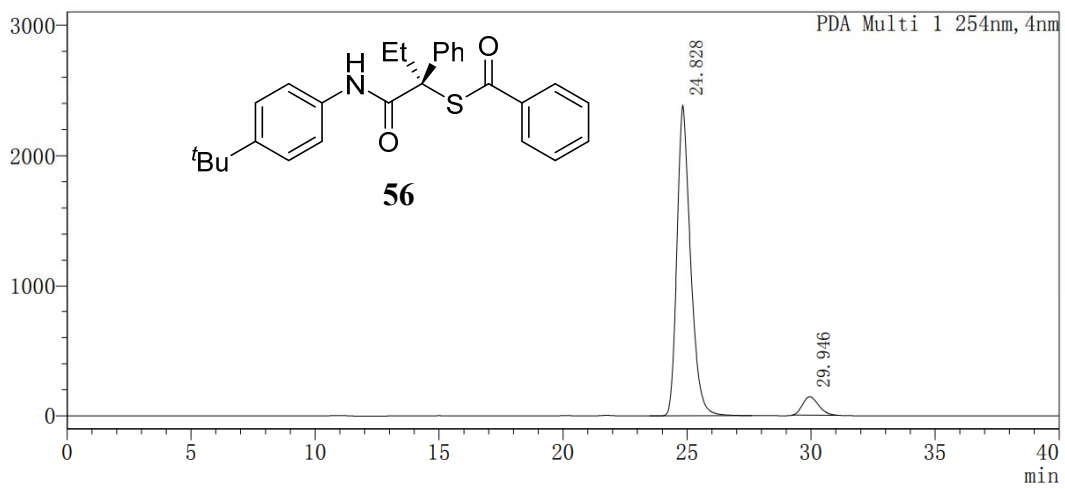

Peak Table

PDA Ch1 254nm

| Peak# | Ret. Time | Area     | Area%  |
|-------|-----------|----------|--------|
| 1     | 24.828    | 90639272 | 93.417 |
| 2     | 29.946    | 6386883  | 6.583  |

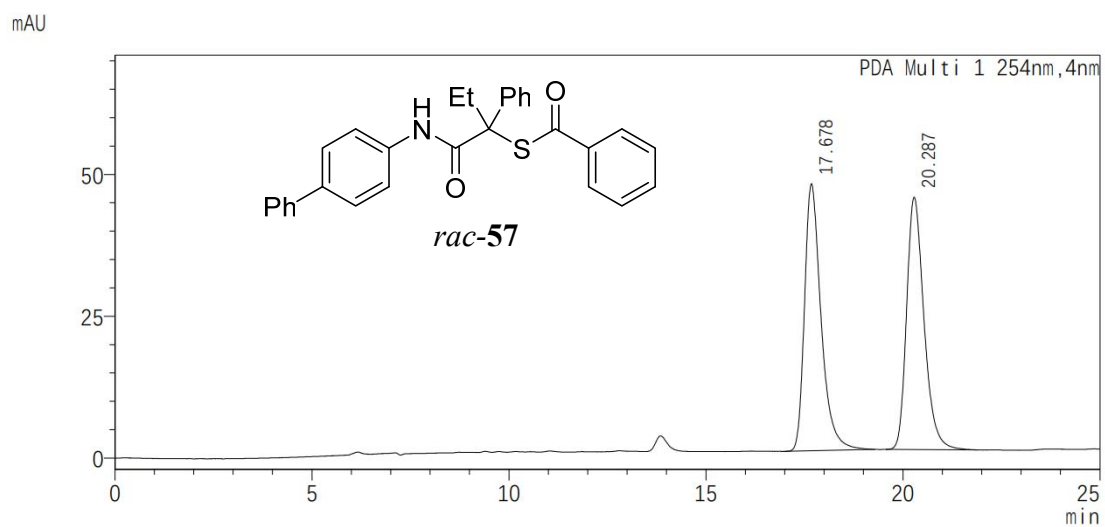

Peak Table

PDA Ch1 254nm

| Peak# | Ret. Time | Area    | Area%  |
|-------|-----------|---------|--------|
| 1     | 17.678    | 1378141 | 50.196 |
| 2     | 20.287    | 1367374 | 49.804 |

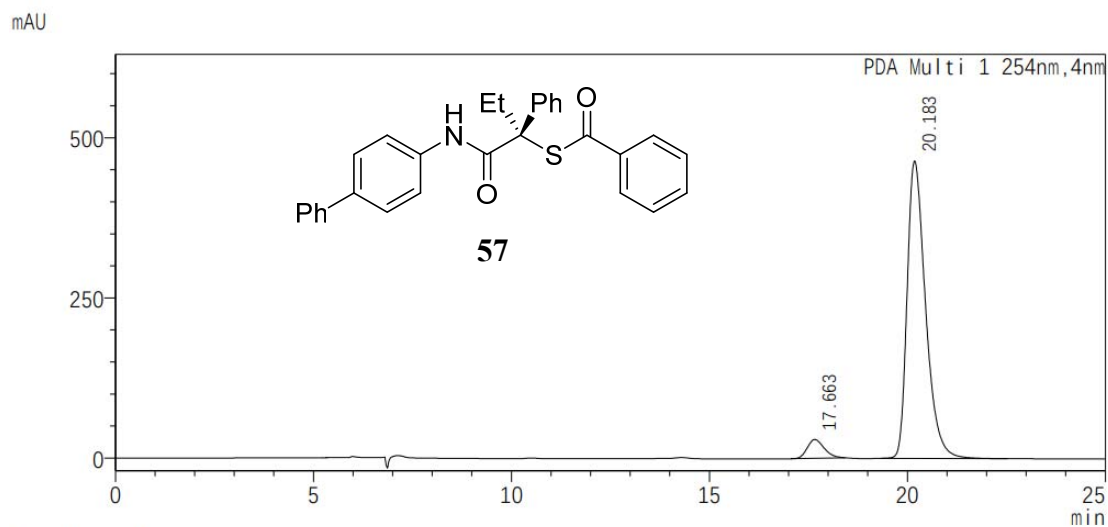

Peak Table

PDA Ch1 254nm

| Peak# | Ret. Time | Area     | Area%  |
|-------|-----------|----------|--------|
| 1     | 17.663    | 870371   | 5.471  |
| 2     | 20.183    | 15039201 | 94.529 |

mAU

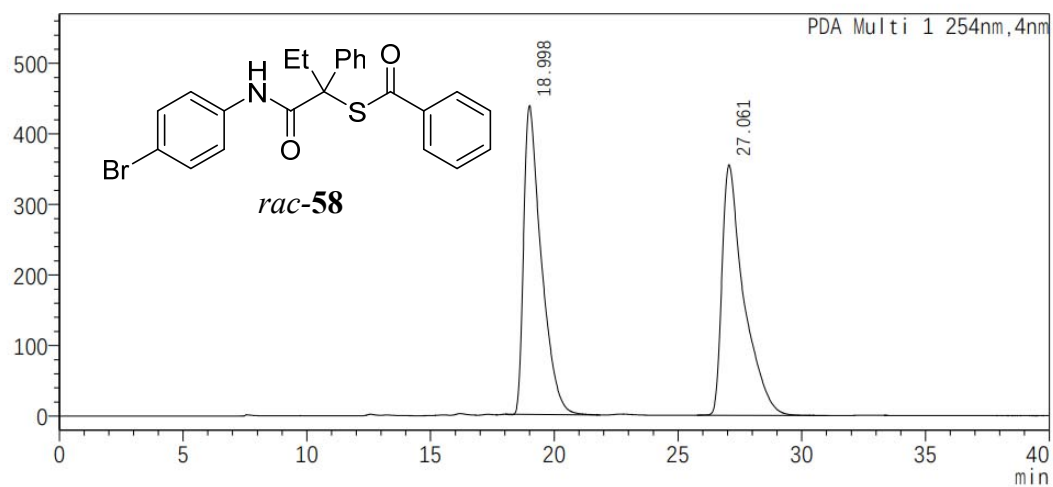

Peak Table

PDA Ch1 254nm

| Peak# | Ret. Time | Area     | Area%  |
|-------|-----------|----------|--------|
| 1     | 18.998    | 21698332 | 49.919 |
| 2     | 27.061    | 21769020 | 50.081 |

mAU

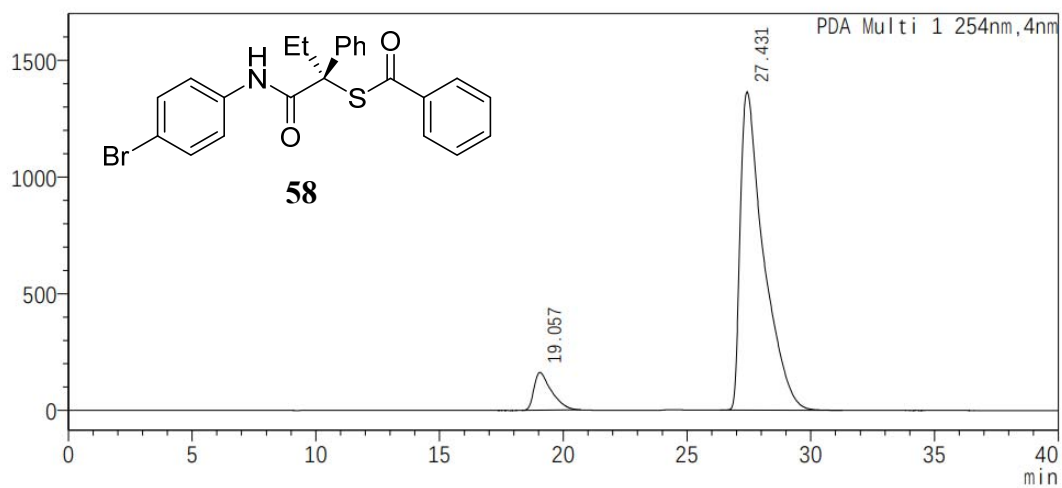

Peak Table

PDA Ch1 254nm

| Peak# | Ret. Time | Area     | Area%  |
|-------|-----------|----------|--------|
| 1     | 19.057    | 7914961  | 8.135  |
| 2     | 27.431    | 89385045 | 91.865 |



mAU

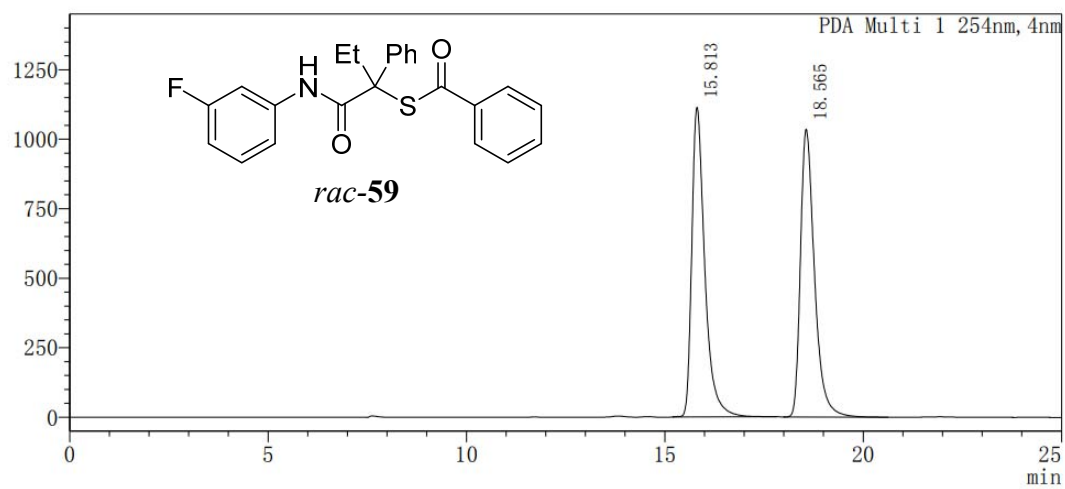

Peak Table

PDA Ch1 254nm

| Peak# | Ret. Time | Area     | Area%  |
|-------|-----------|----------|--------|
| 1     | 15.813    | 25409763 | 49.961 |
| 2     | 18.565    | 25449458 | 50.039 |

mAU

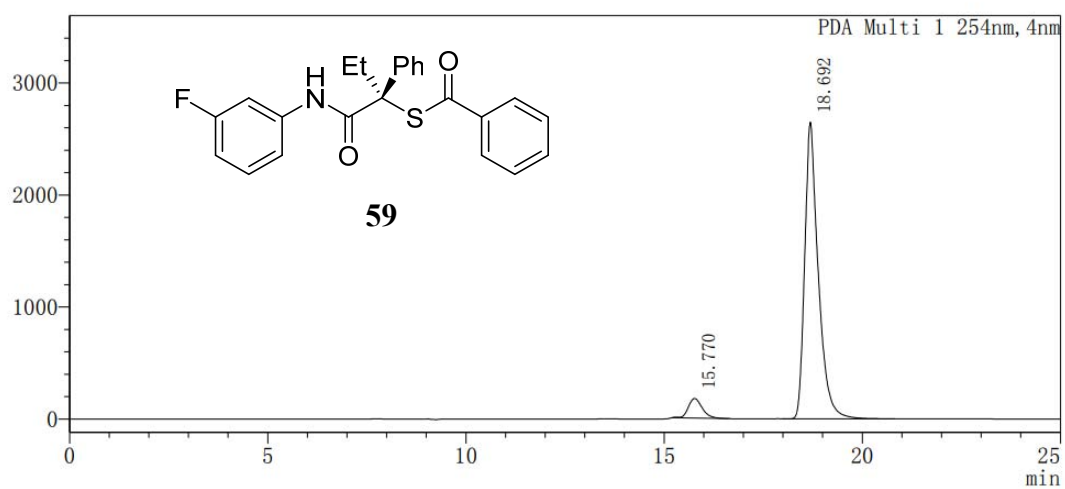

Peak Table

PDA Ch1 254nm

| Peak# | Ret. Time | Area     | Area%  |
|-------|-----------|----------|--------|
| 1     | 15.770    | 4276206  | 6.369  |
| 2     | 18.692    | 62869264 | 93.631 |

mAU

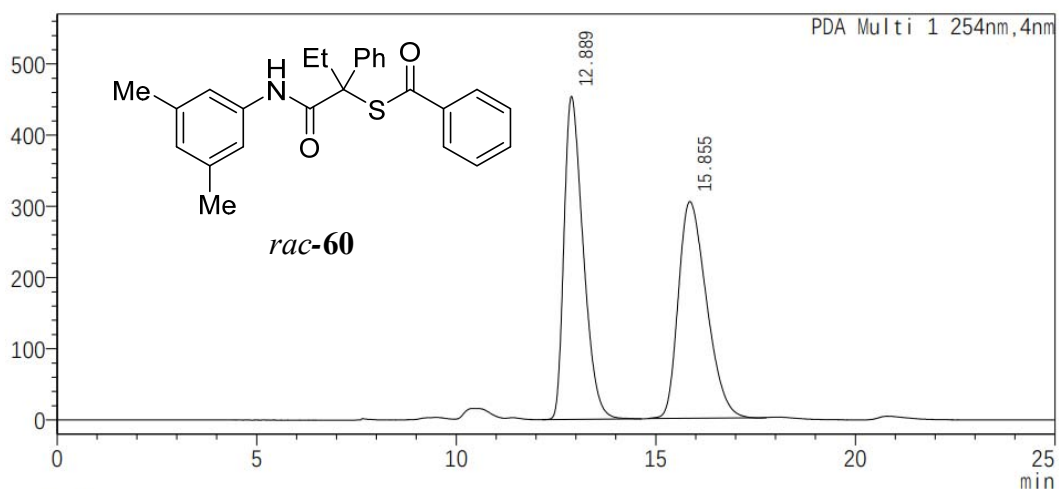

Peak Table

PDA Ch1 254nm

| Peak# | Ret. Time | Area     | Area%  |
|-------|-----------|----------|--------|
| 1     | 12.889    | 15208794 | 50.445 |
| 2     | 15.855    | 14940249 | 49.555 |

mAU

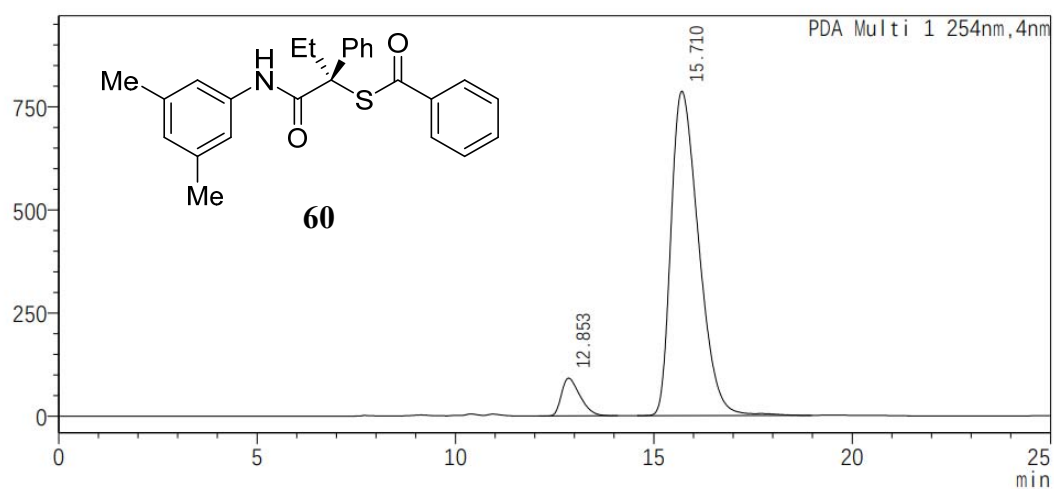

Peak Table

PDA Ch1 254nm

| Peak# | Ret. Time | Area     | Area%  |
|-------|-----------|----------|--------|
| 1     | 12.853    | 2975448  | 7.226  |
| 2     | 15.710    | 38199272 | 92.774 |

mAU

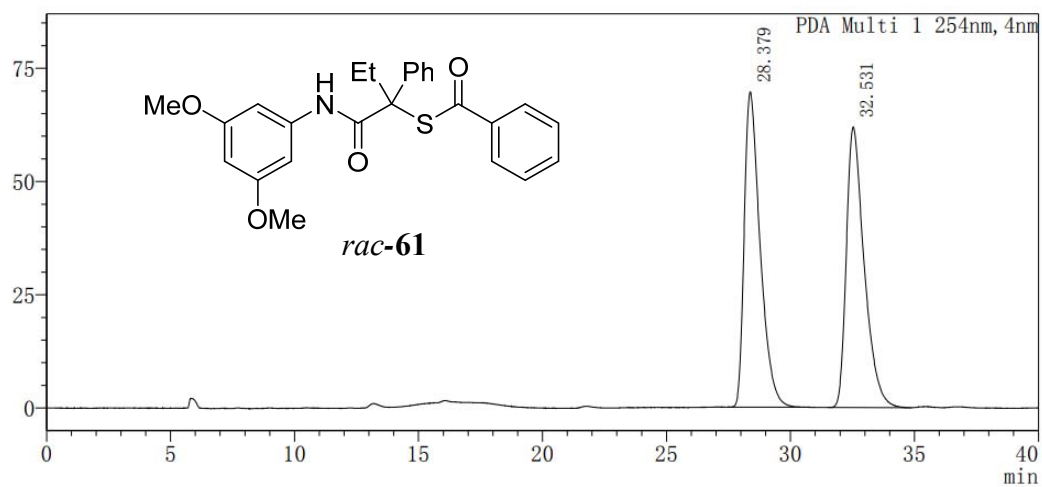

Peak Table

PDA Ch1 254nm

| Peak# | Ret. Time | Area    | Area%  |
|-------|-----------|---------|--------|
| 1     | 28.379    | 3097972 | 49.947 |
| 2     | 32.531    | 3104562 | 50.053 |

mAU

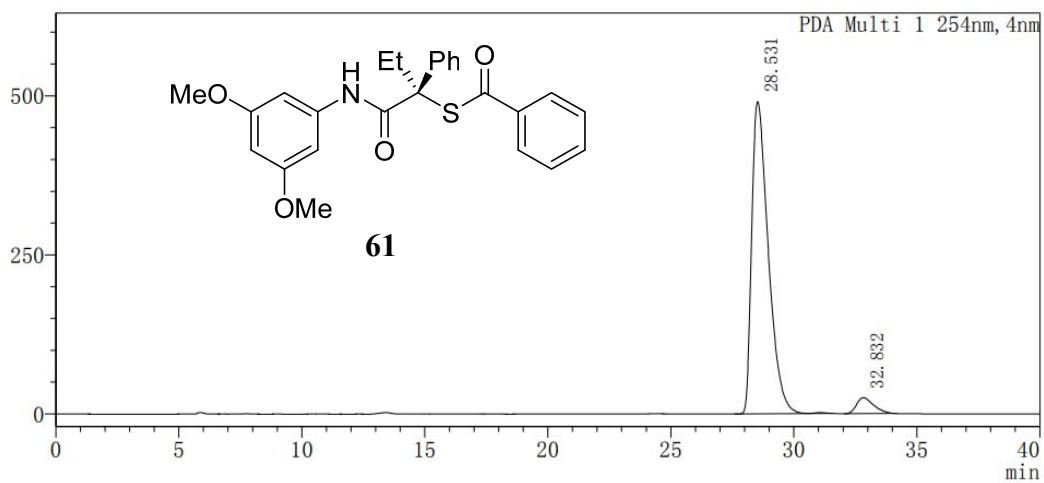

Peak Table

PDA Ch1 254nm

| Peak# | Ret. Time | Area     | Area%  |
|-------|-----------|----------|--------|
| 1     | 28.531    | 22985131 | 94.946 |
| 2     | 32.832    | 1223383  | 5.054  |

mAU

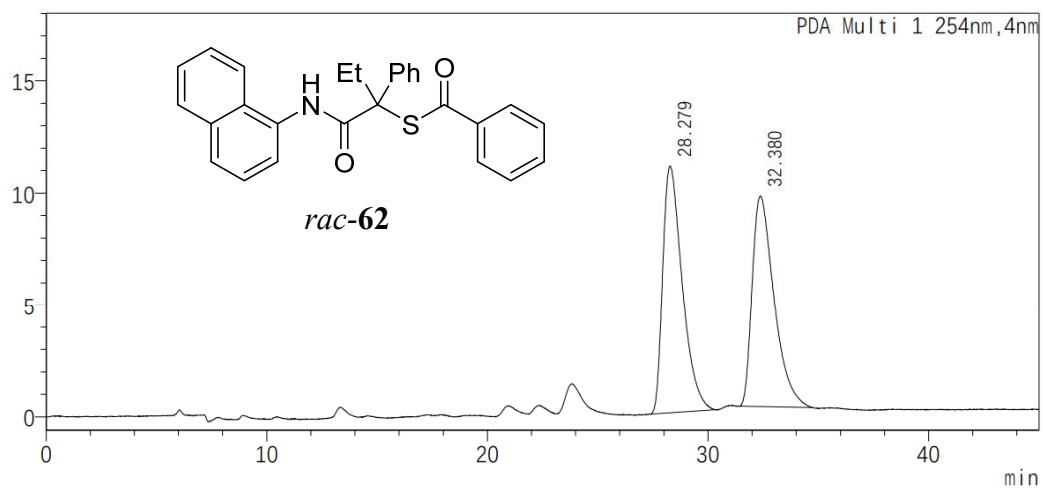

Peak Table

PDA Ch1 254nm

| Peak# | Ret. Time | Area   | Area%  |
|-------|-----------|--------|--------|
| 1     | 28.279    | 678941 | 51.095 |
| 2     | 32.380    | 649836 | 48.905 |

mAU

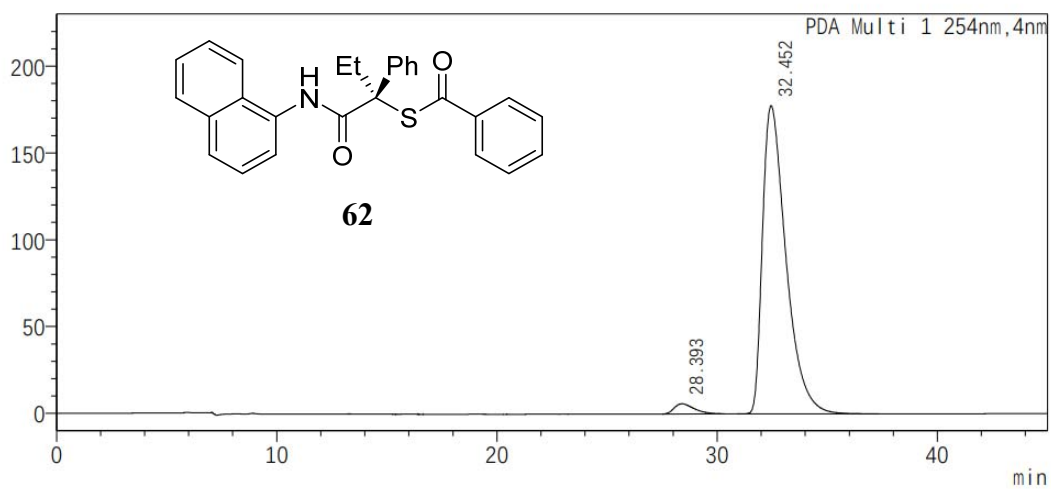

Peak Table

PDA Ch1 254nm

| Peak# | Ret. Time | Area     | Area%  |
|-------|-----------|----------|--------|
| 1     | 28.393    | 367108   | 2.713  |
| 2     | 32.452    | 13163809 | 97.287 |

mAU

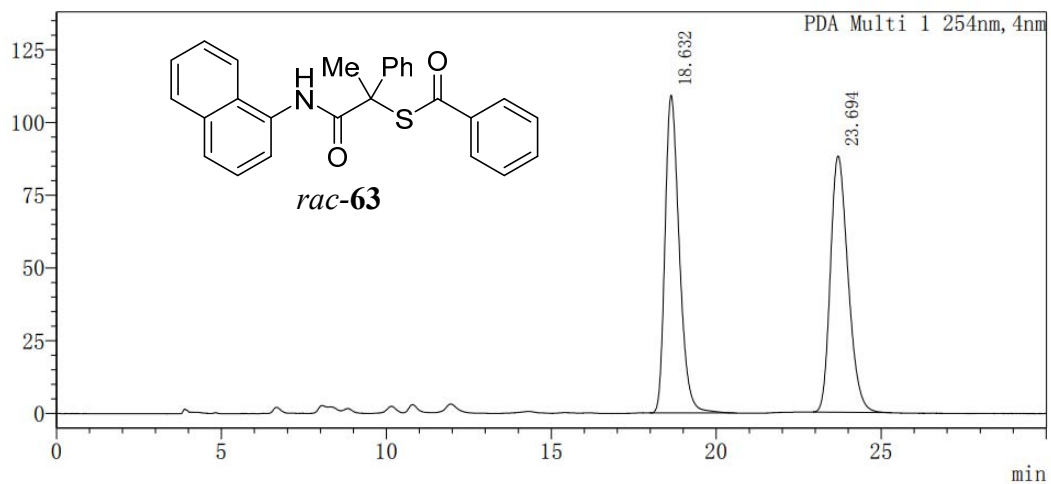

Peak Table

PDA Ch1 254nm

| Peak# | Ret. Time | Area    | Area%  |
|-------|-----------|---------|--------|
| 1     | 18.632    | 3282819 | 50.024 |
| 2     | 23.694    | 3279631 | 49.976 |

mAU

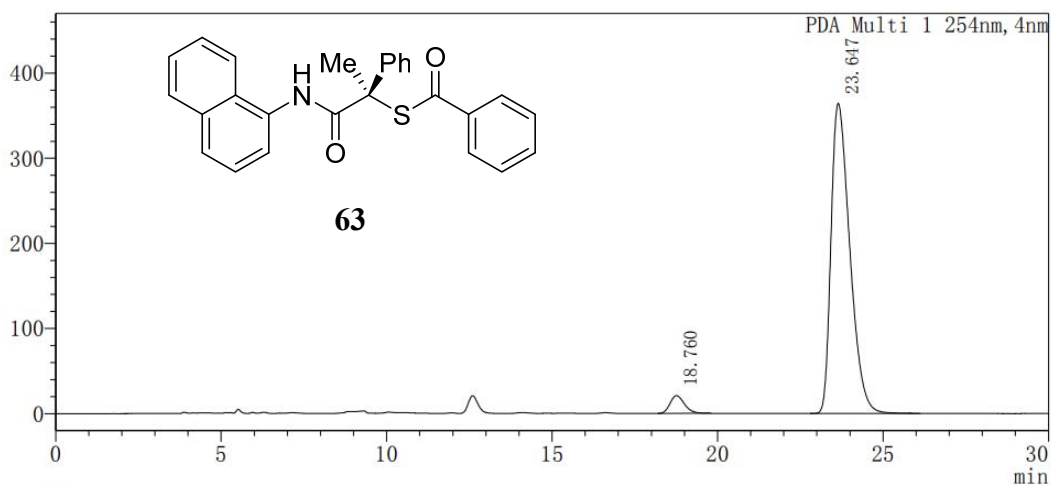

Peak Table

PDA Ch1 254nm

| Peak# | Ret. Time | Area     | Area%  |
|-------|-----------|----------|--------|
| 1     | 18.760    | 631139   | 4.206  |
| 2     | 23.647    | 14373000 | 95.794 |

mAU

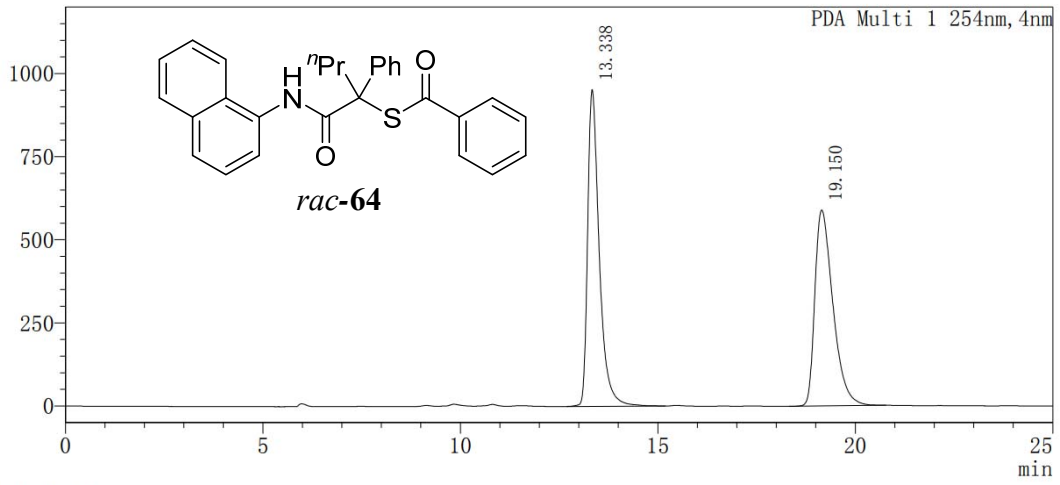

Peak Table

PDA Ch1 254nm

| Peak# | Ret. Time | Area     | Area%  |
|-------|-----------|----------|--------|
| 1     | 13.338    | 19519969 | 50.988 |
| 2     | 19.150    | 18763310 | 49.012 |

mAU

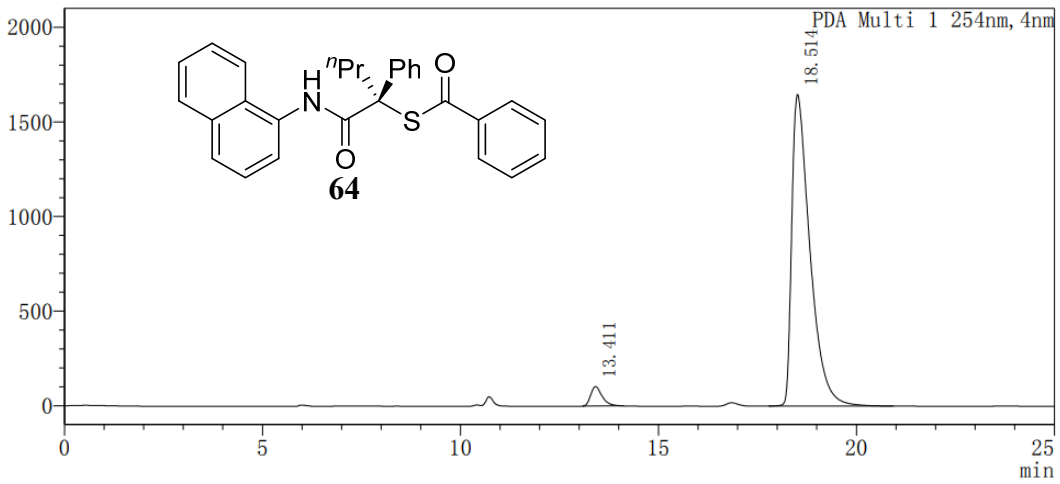

Peak Table

PDA Ch1 254nm

| Peak# | Ret. Time | Area     | Area%  |
|-------|-----------|----------|--------|
| 1     | 13.411    | 2060449  | 3.775  |
| 2     | 18.514    | 52527294 | 96.225 |

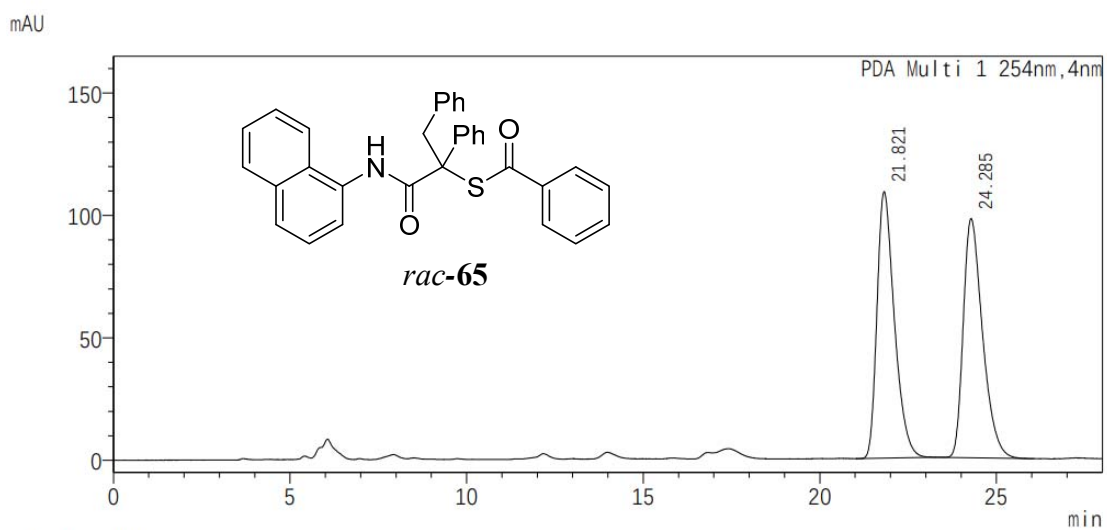

Peak Table

PDA Ch1 254nm

| Peak# | Ret. Time | Area    | Area%  |
|-------|-----------|---------|--------|
| 1     | 21.821    | 3723162 | 50.016 |
| 2     | 24.285    | 3720791 | 49.984 |

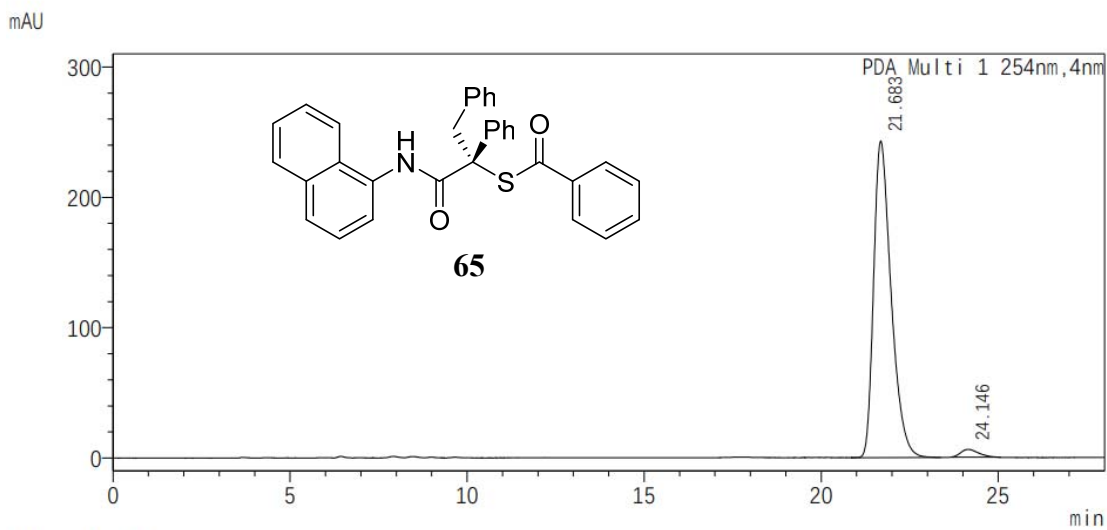

Peak Table

PDA Ch1 254nm

| Peak# | Ret. Time | Area    | Area%  |
|-------|-----------|---------|--------|
| 1     | 21.683    | 8347986 | 97.592 |
| 2     | 24.146    | 205975  | 2.408  |

mAU

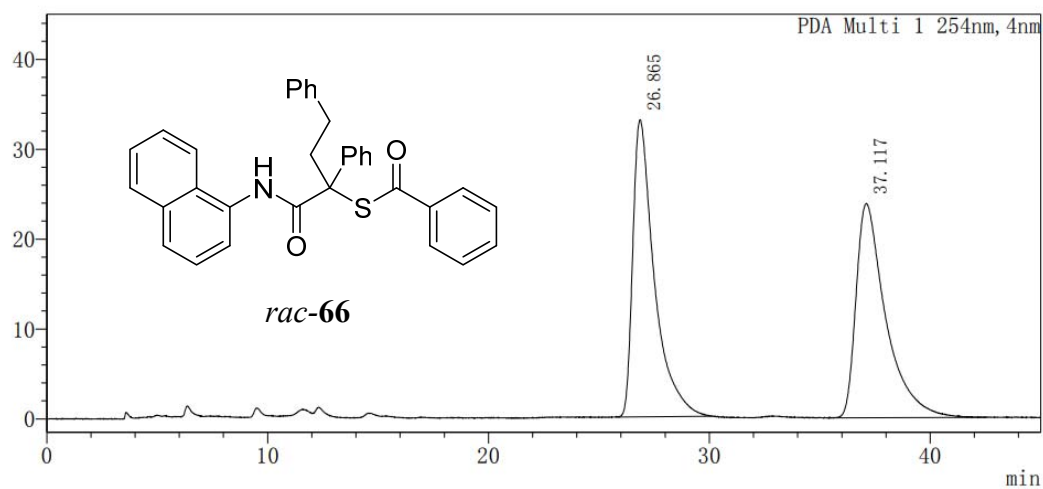

Peak Table

PDA Ch1 254nm

| Peak# | Ret. Time | Area    | Area%  |
|-------|-----------|---------|--------|
| 1     | 26.865    | 2239294 | 50.141 |
| 2     | 37.117    | 2226728 | 49.859 |

mAU

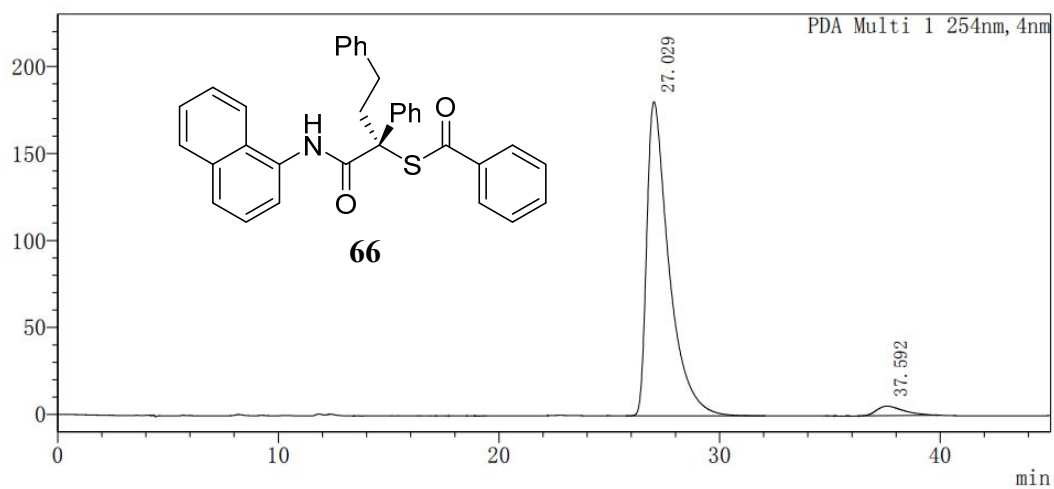

Peak Table

PDA Ch1 254nm

| Peak# | Ret. Time | Area     | Area%  |
|-------|-----------|----------|--------|
| 1     | 27.029    | 12610516 | 96.386 |
| 2     | 37.592    | 472828   | 3.614  |



mAU

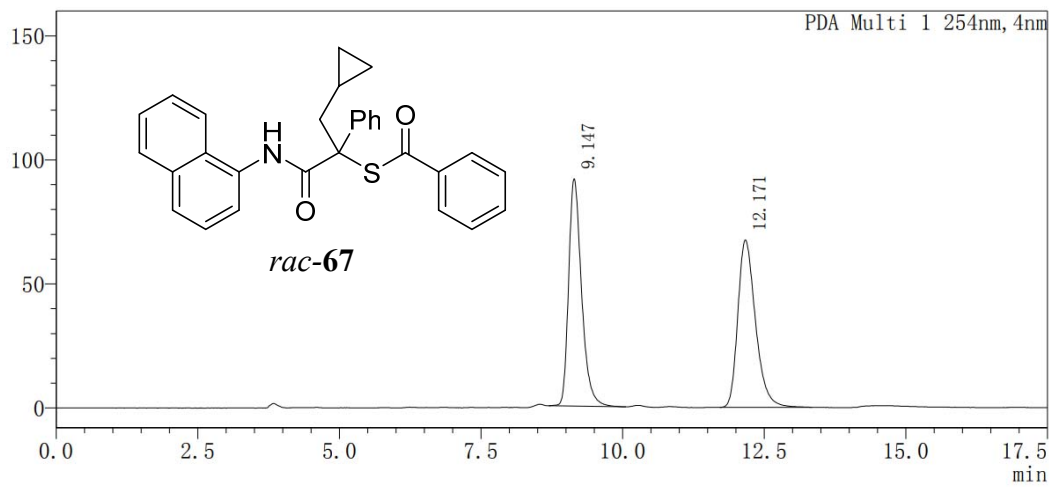

Peak Table

PDA Ch1 254nm

| Peak# | Ret. Time | Area    | Area%  |
|-------|-----------|---------|--------|
| 1     | 9.147     | 1456202 | 49.824 |
| 2     | 12.171    | 1466488 | 50.176 |

mAU

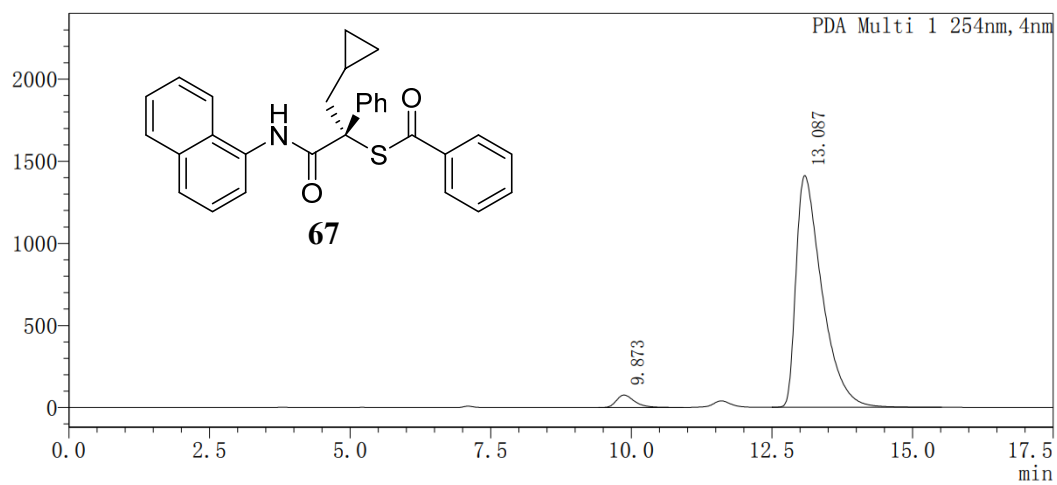

PDA Ch1 254nm

| T      | Hight   | Area     | Area%  |
|--------|---------|----------|--------|
| 9.873  | 76037   | 1722928  | 3.659  |
| 13.087 | 1411410 | 45365374 | 96.341 |

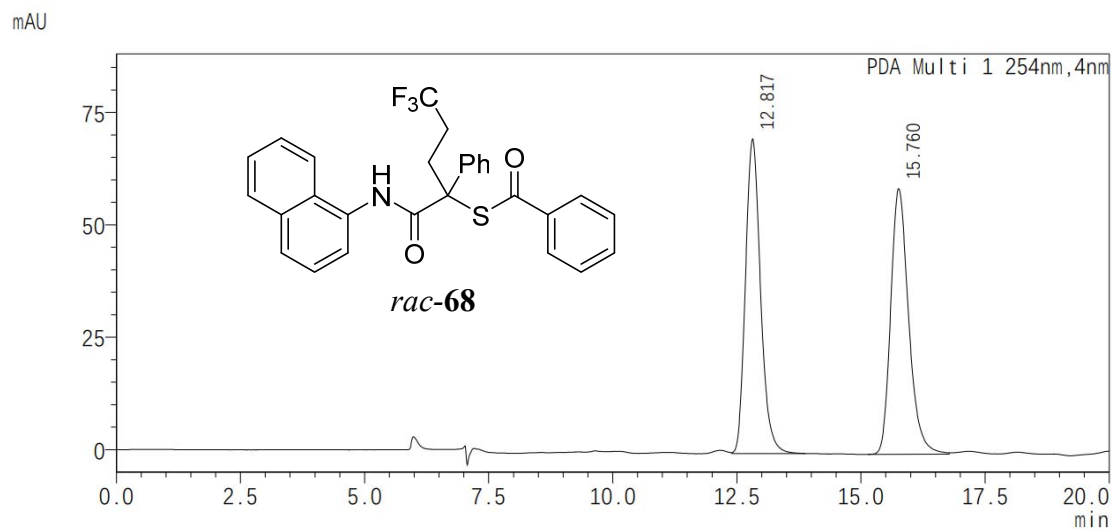

Peak Table

PDA Ch1 254nm

| Peak# | Ret. Time | Area    | Area%  |
|-------|-----------|---------|--------|
| 1     | 12.817    | 1481149 | 49.925 |
| 2     | 15.760    | 1485611 | 50.075 |

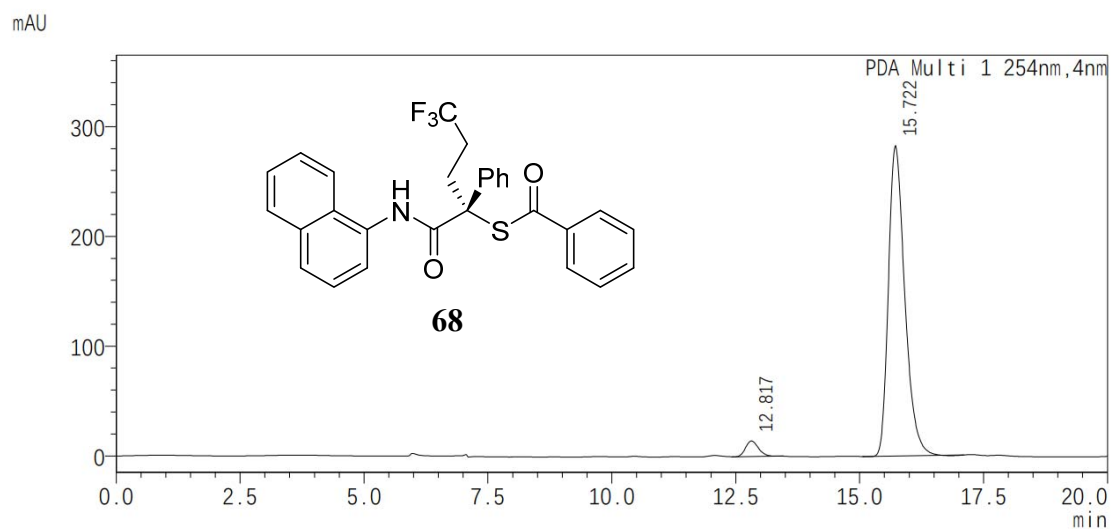

Peak Table

PDA Ch1 254nm

| Peak# | Ret. Time | Area    | Area%  |
|-------|-----------|---------|--------|
| 1     | 12.817    | 257100  | 3.809  |
| 2     | 15.722    | 6493207 | 96.191 |

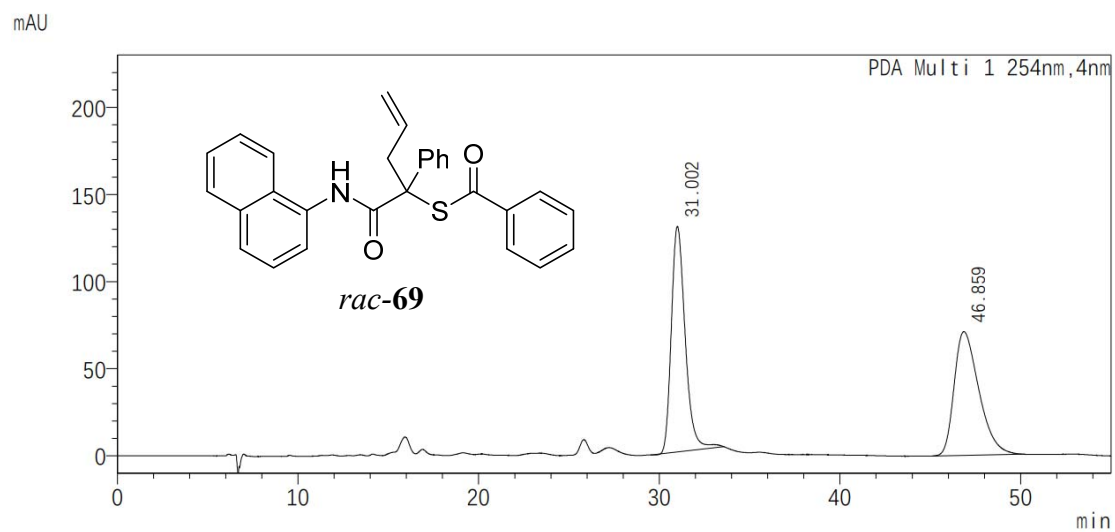

Peak Table

PDA Ch1 254nm

| Peak# | Ret. Time | Area    | Area%  |
|-------|-----------|---------|--------|
| 1     | 31.002    | 6885086 | 50.463 |
| 2     | 46.859    | 6758690 | 49.537 |

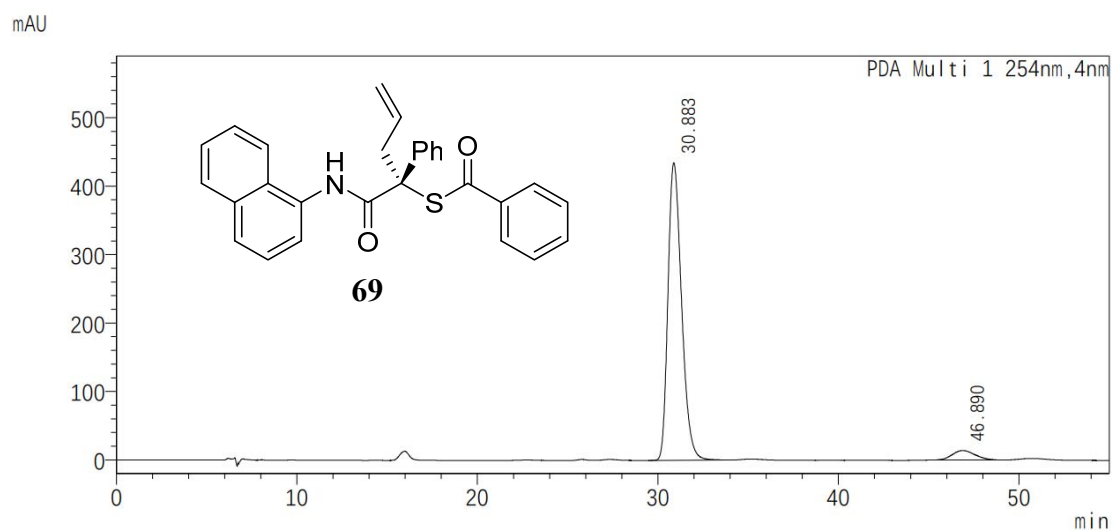

Peak Table

PDA Ch1 254nm

| Peak# | Ret. Time | Area     | Area%  |
|-------|-----------|----------|--------|
| 1     | 30.883    | 22619031 | 95.013 |
| 2     | 46.890    | 1187174  | 4.987  |

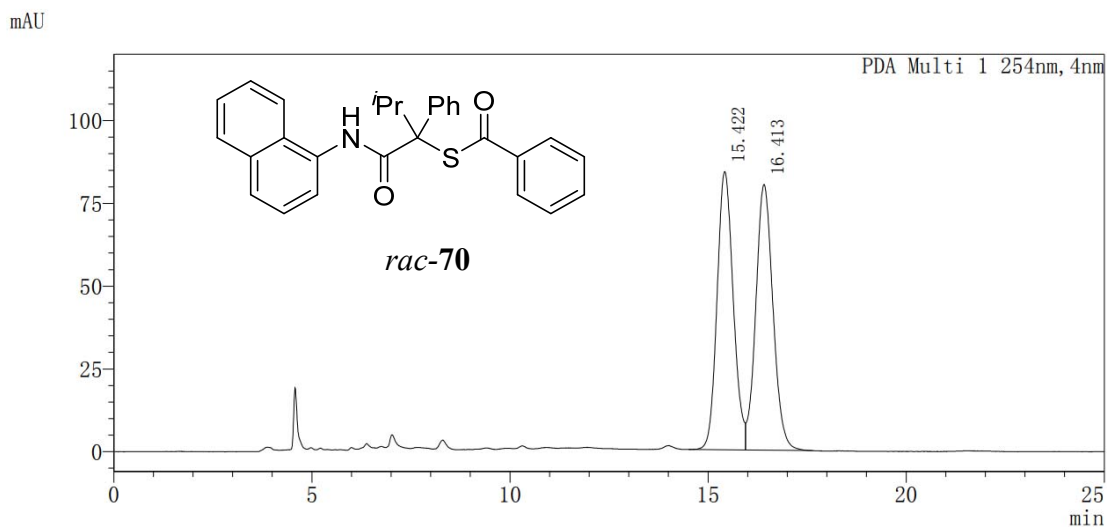

Peak Table

PDA Ch1 254nm

| Peak# | Ret. Time | Area    | Area%  |
|-------|-----------|---------|--------|
| 1     | 15.422    | 2391264 | 49.681 |
| 2     | 16.413    | 2421961 | 50.319 |

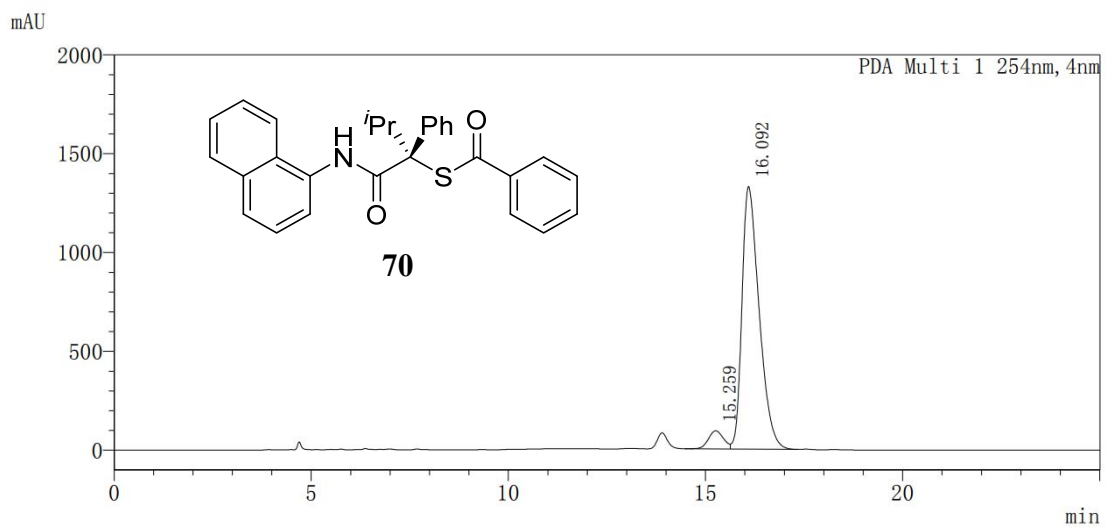

Peak Table

PDA Ch1 254nm

| Peak# | Ret. Time | Area     | Area%  |
|-------|-----------|----------|--------|
| 1     | 15.259    | 2448160  | 5.736  |
| 2     | 16.092    | 40230220 | 94.264 |

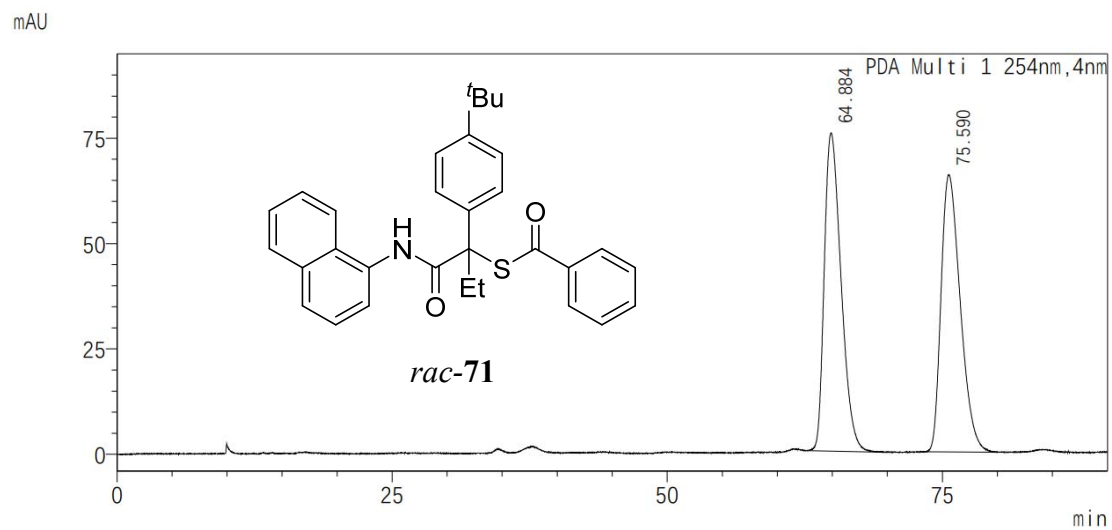

Peak Table

PDA Ch1 254nm

| Peak# | Ret. Time | Area    | Area%  |
|-------|-----------|---------|--------|
| 1     | 64.884    | 8023396 | 50.070 |
| 2     | 75.590    | 8001112 | 49.930 |

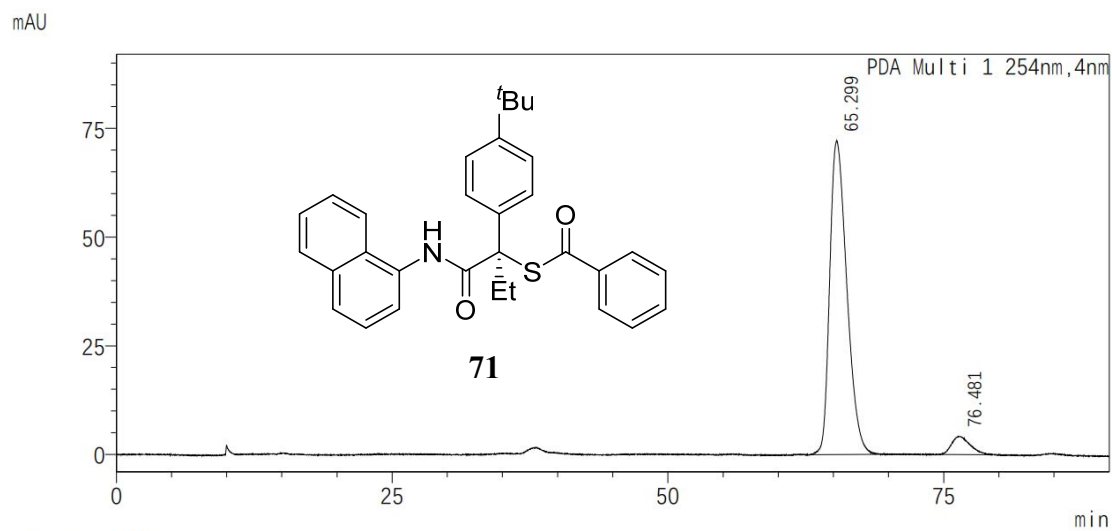

Peak Table

PDA Ch1 254nm

| Peak# | Ret. Time | Area    | Area%  |
|-------|-----------|---------|--------|
| 1     | 65.299    | 7788616 | 94.148 |
| 2     | 76.481    | 484108  | 5.852  |

mAU

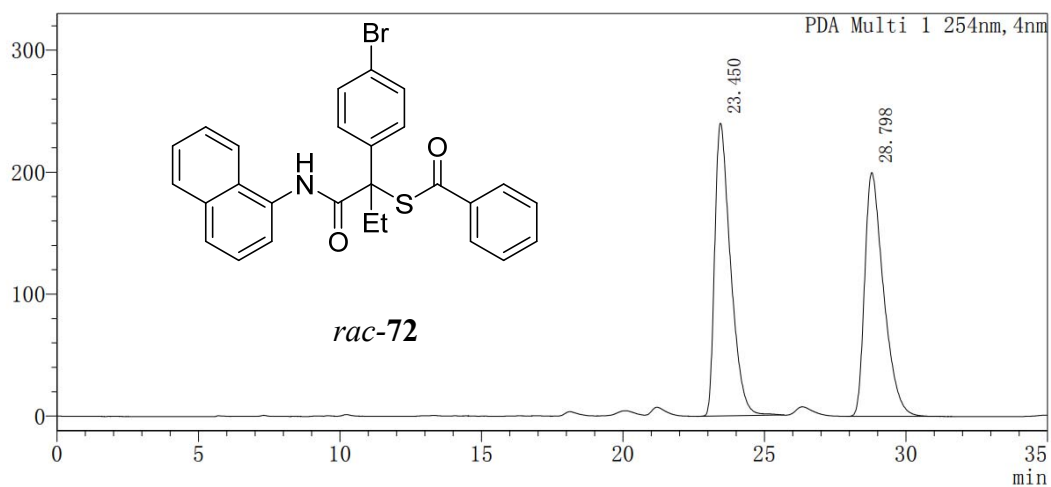

Peak Table

PDA Ch1 254nm

| Peak# | Ret. Time | Area    | Area%  |
|-------|-----------|---------|--------|
| 1     | 23.450    | 9356145 | 50.164 |
| 2     | 28.798    | 9294871 | 49.836 |

mAU

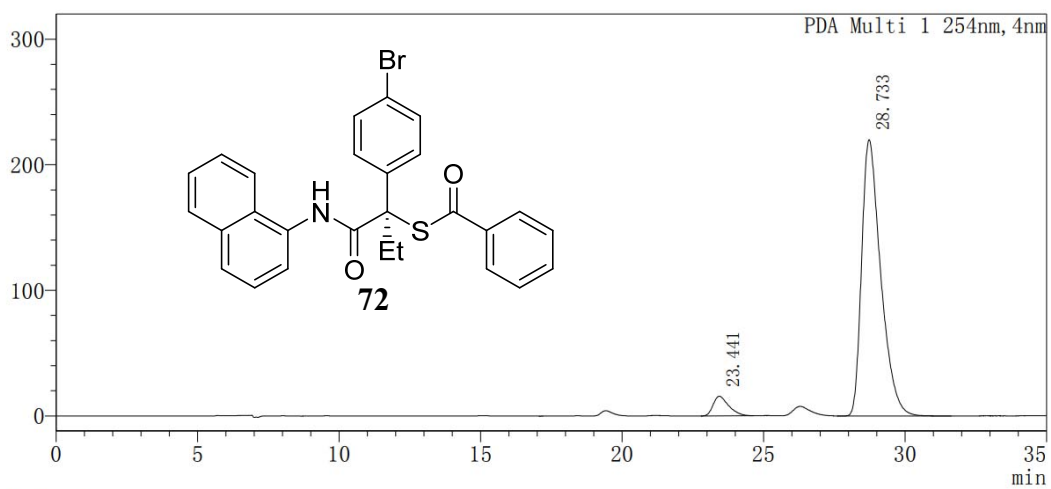

Peak Table

PDA Ch1 254nm

| Peak# | Ret. Time | Area     | Area%  |
|-------|-----------|----------|--------|
| 1     | 23.441    | 598561   | 5.477  |
| 2     | 28.733    | 10329282 | 94.523 |

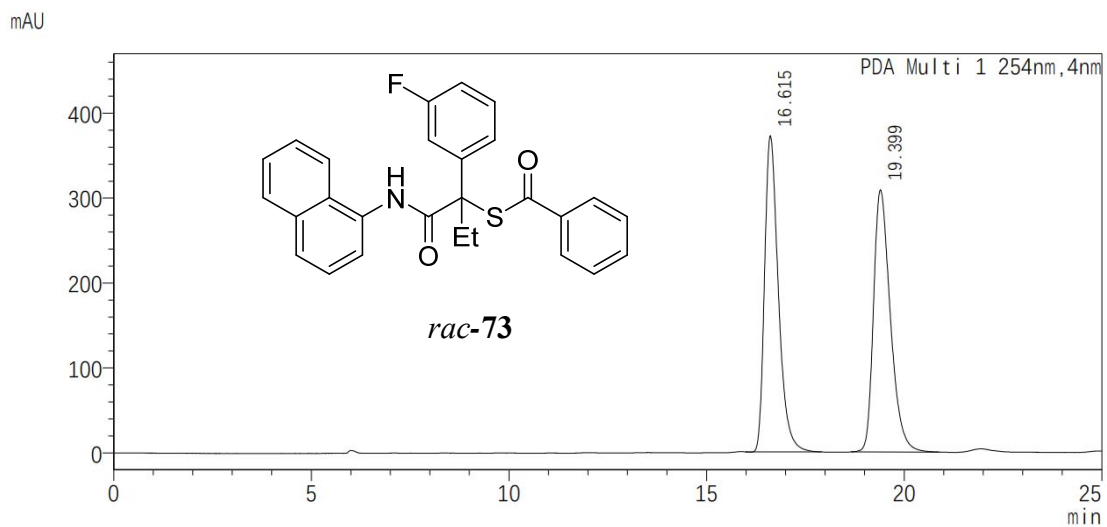

Peak Table

PDA Ch1 254nm

| Peak# | Ret. Time | Area    | Area%  |
|-------|-----------|---------|--------|
| 1     | 16.615    | 9035215 | 49.652 |
| 2     | 19.399    | 9161901 | 50.348 |

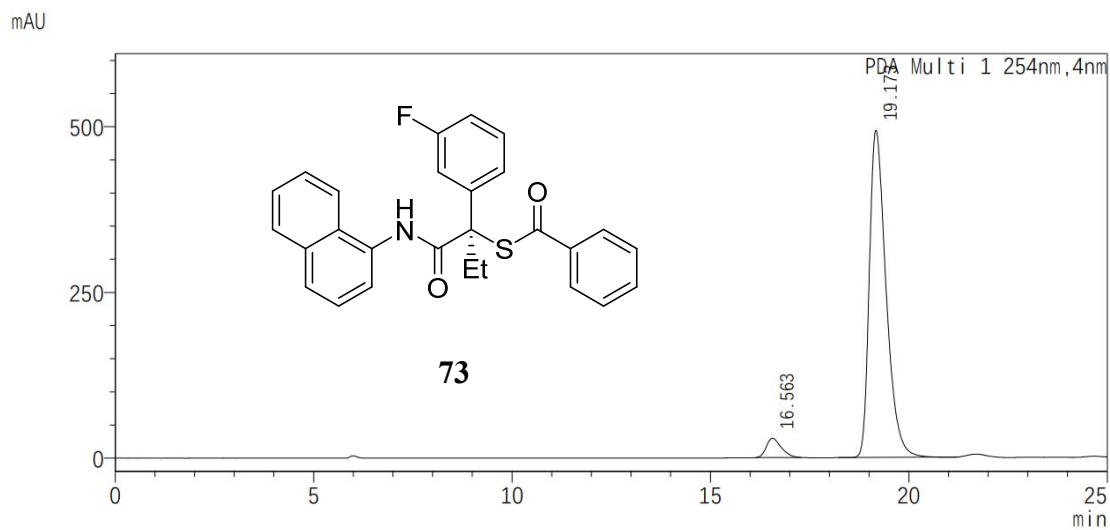

Peak Table

PDA Ch1 254nm

| Peak# | Ret. Time | Area     | Area%  |
|-------|-----------|----------|--------|
| 1     | 16.563    | 758940   | 4.983  |
| 2     | 19.173    | 14471460 | 95.017 |

mAU

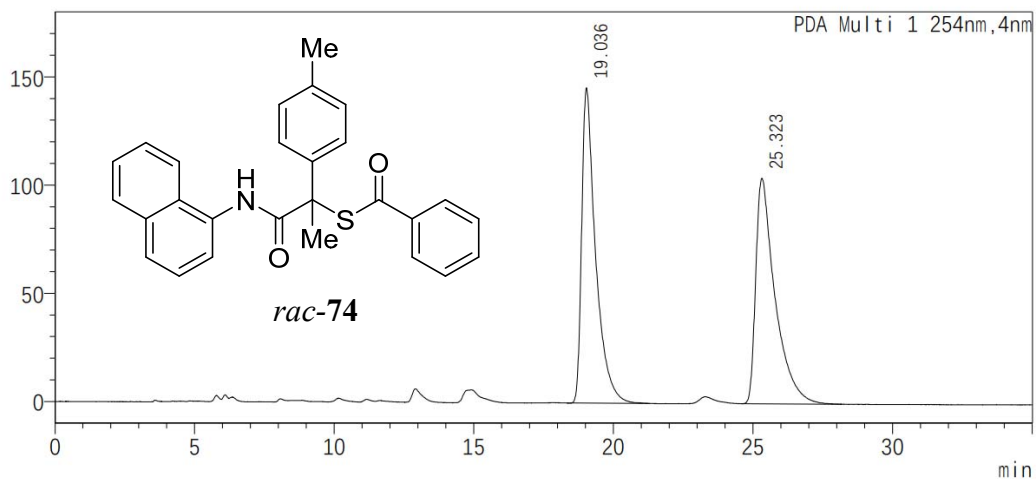

Peak Table

PDA Ch1 254nm

| Peak# | Ret. Time | Area    | Area%  |
|-------|-----------|---------|--------|
| 1     | 19.036    | 5047698 | 50.198 |
| 2     | 25.323    | 5007806 | 49.802 |

mAU

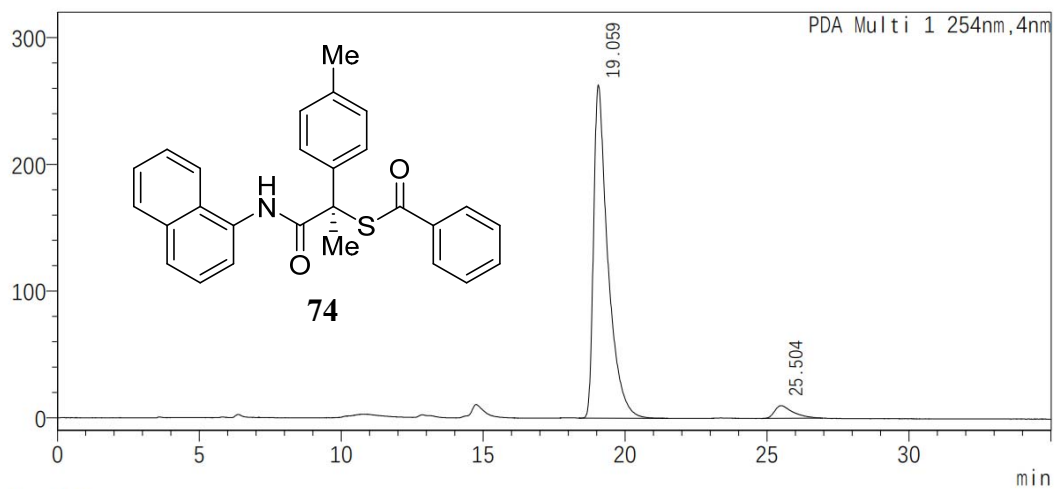

Peak Table

PDA Ch1 254nm

| Peak# | Ret. Time | Area    | Area%  |
|-------|-----------|---------|--------|
| 1     | 19.059    | 9202620 | 95.334 |
| 2     | 25.504    | 450450  | 4.666  |



mAU

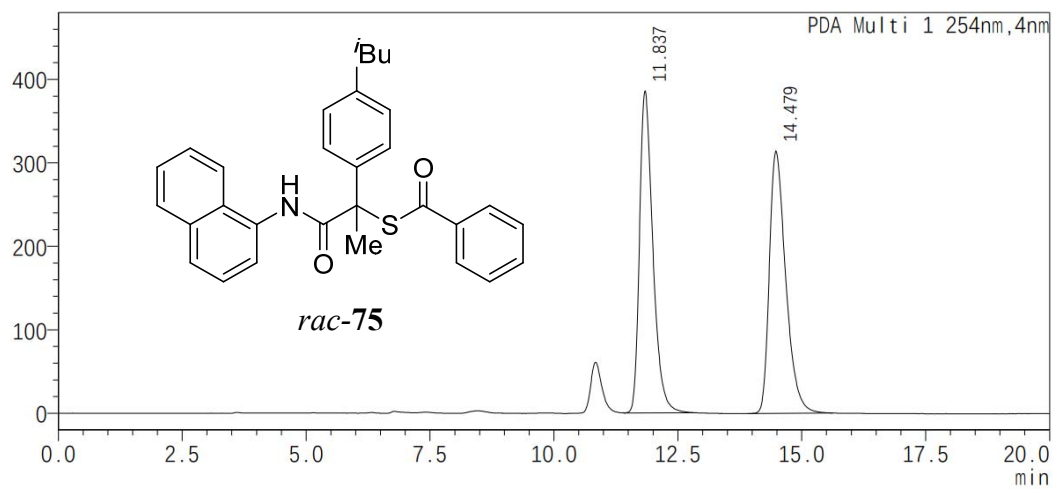

Peak Table

PDA Ch1 254nm

| Peak# | Ret. Time | Area    | Area%  |
|-------|-----------|---------|--------|
| 1     | 11.837    | 7229705 | 49.977 |
| 2     | 14.479    | 7236311 | 50.023 |

mAU

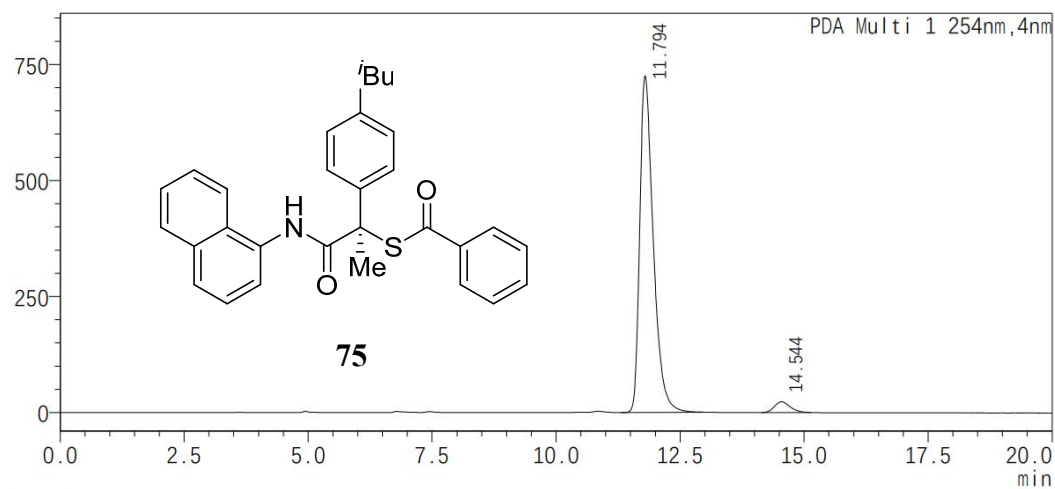

Peak Table

PDA Ch1 254nm

| Peak# | Ret. Time | Area     | Area%  |
|-------|-----------|----------|--------|
| 1     | 11.794    | 13774900 | 96.444 |
| 2     | 14.544    | 507968   | 3.556  |

mAU

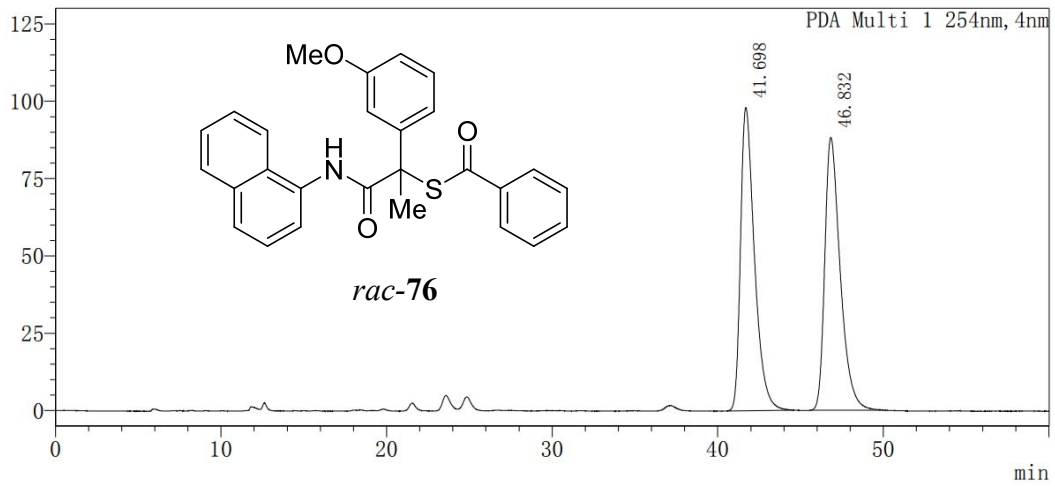

Peak Table

PDA Ch1 254nm

| Peak# | Ret. Time | Area    | Area%  |
|-------|-----------|---------|--------|
| 1     | 41.698    | 5733158 | 50.002 |
| 2     | 46.832    | 5732780 | 49.998 |

mAU

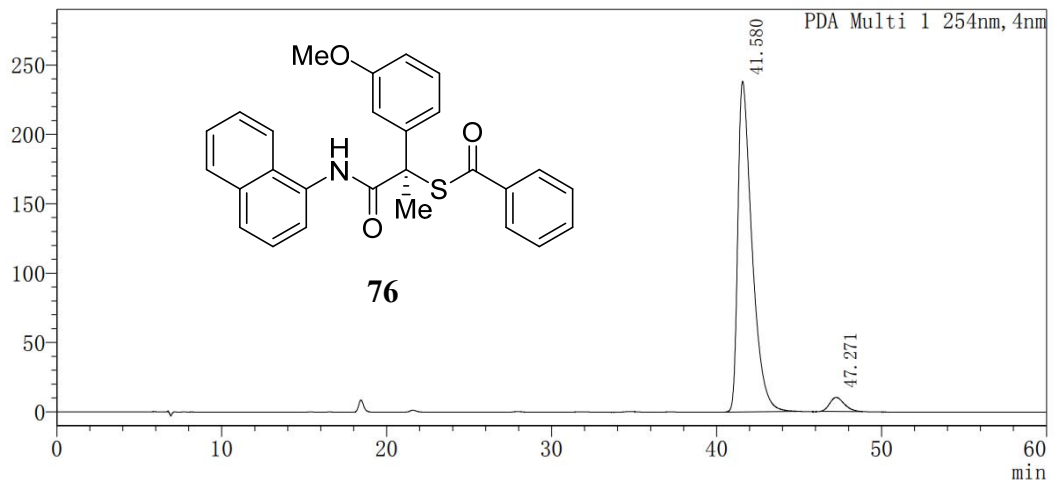

Peak Table

PDA Ch1 254nm

| Peak# | Ret. Time | Area     | Area%  |
|-------|-----------|----------|--------|
| 1     | 41.580    | 14254970 | 95.822 |
| 2     | 47.271    | 621487   | 4.178  |

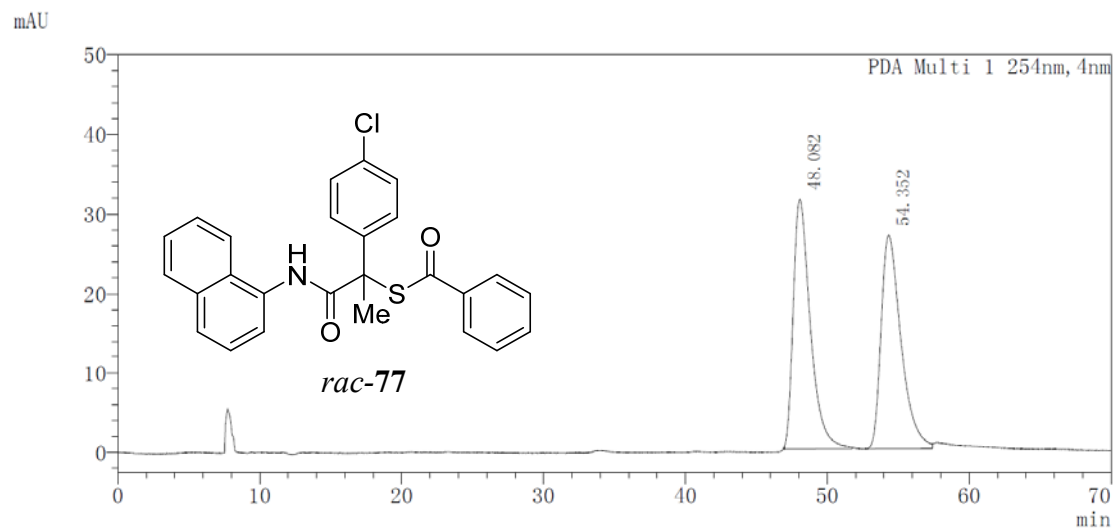

Peak Table

PDA Ch1 254nm

| Peak# | Ret. Time | Area    | Area%  |
|-------|-----------|---------|--------|
| 1     | 48.082    | 2633414 | 50.142 |
| 2     | 54.352    | 2618461 | 49.858 |

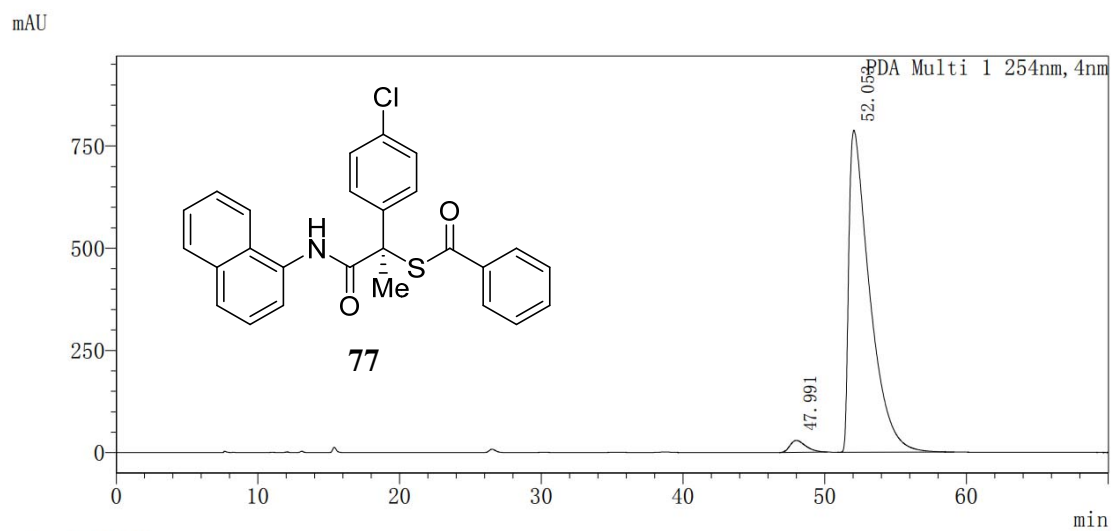

Peak Table

PDA Ch1 254nm

| Peak# | Ret. Time | Area     | Area%  |
|-------|-----------|----------|--------|
| 1     | 47.991    | 2261933  | 2.725  |
| 2     | 52.053    | 80750287 | 97.275 |

mAU

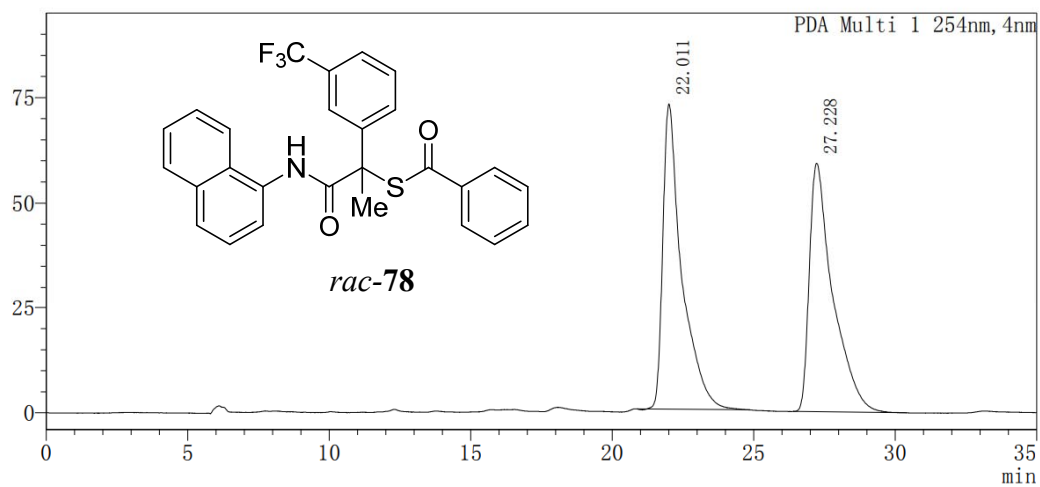

Peak Table

PDA Ch1 254nm

| Peak# | Ret. Time | Area    | Area%  |
|-------|-----------|---------|--------|
| 1     | 22.011    | 3393305 | 49.833 |
| 2     | 27.228    | 3416000 | 50.167 |

mAU

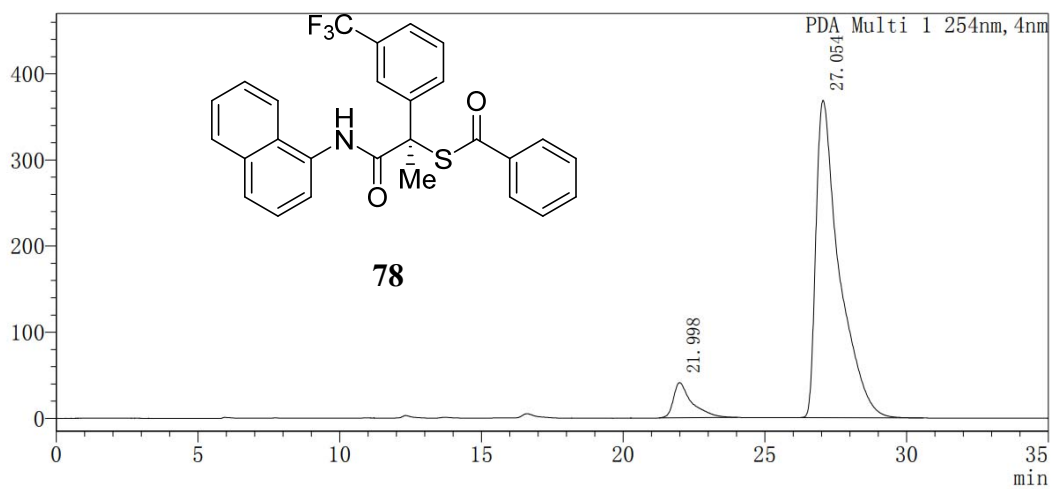

Peak Table

PDA Ch1 254nm

| Peak# | Ret. Time | Area     | Area%  |
|-------|-----------|----------|--------|
| 1     | 21.998    | 1845198  | 8.038  |
| 2     | 27.054    | 21110567 | 91.962 |

mAU

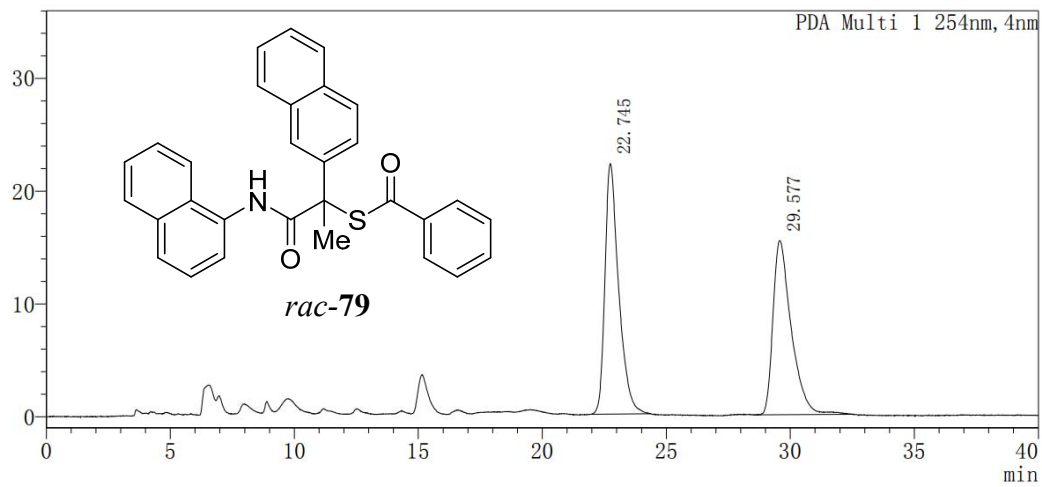

Peak Table

PDA Ch1 254nm

| Peak# | Ret. Time | Area   | Area%  |
|-------|-----------|--------|--------|
| 1     | 22.745    | 858869 | 51.953 |
| 2     | 29.577    | 794292 | 48.047 |

mAU

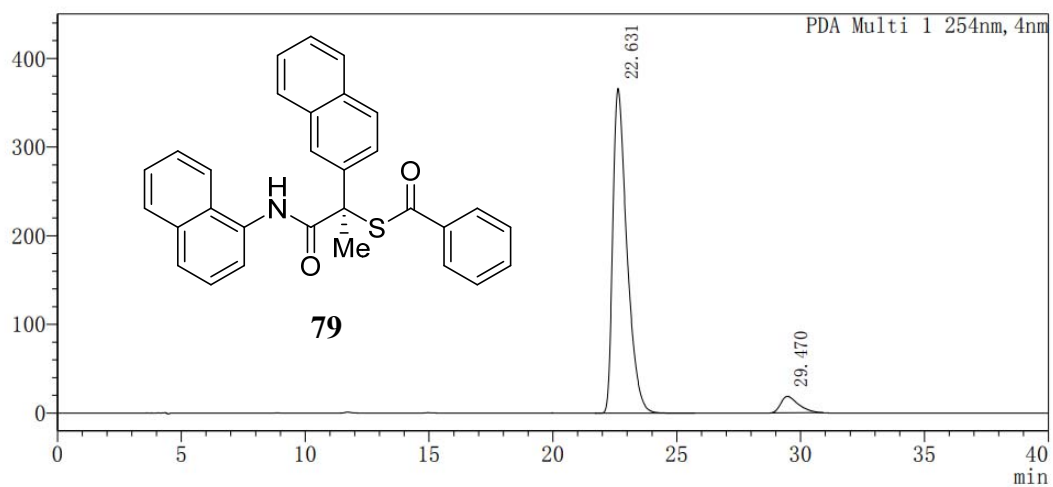

Peak Table

PDA Ch1 254nm

| Peak# | Ret. Time | Area     | Area%  |
|-------|-----------|----------|--------|
| 1     | 22.631    | 14512109 | 94.074 |
| 2     | 29.470    | 914167   | 5.926  |

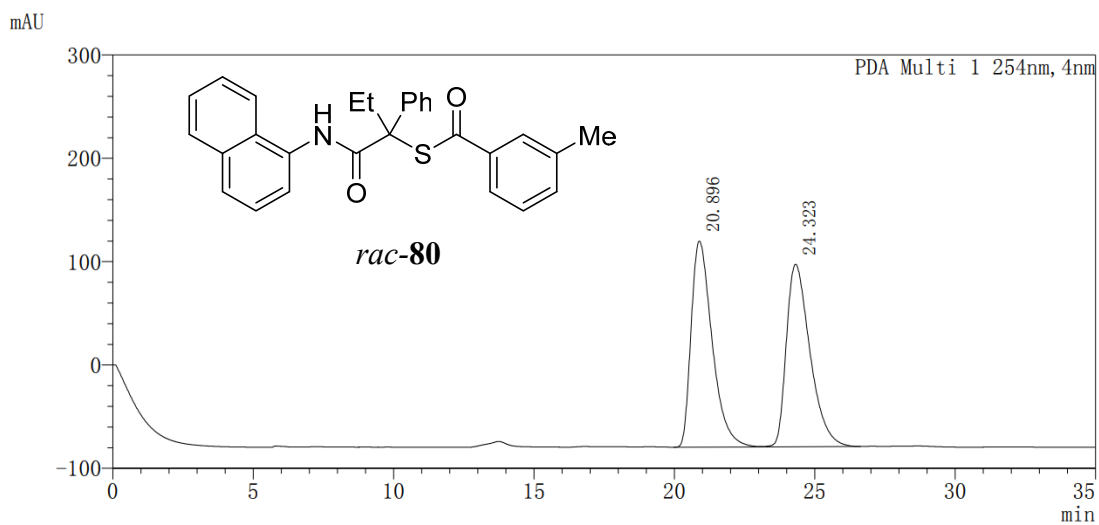

PDA Ch1 254nm

| T      | Hight  | Area     | Area%  |
|--------|--------|----------|--------|
| 20.896 | 199388 | 10394972 | 50.094 |
| 24.323 | 176623 | 10356150 | 49.906 |

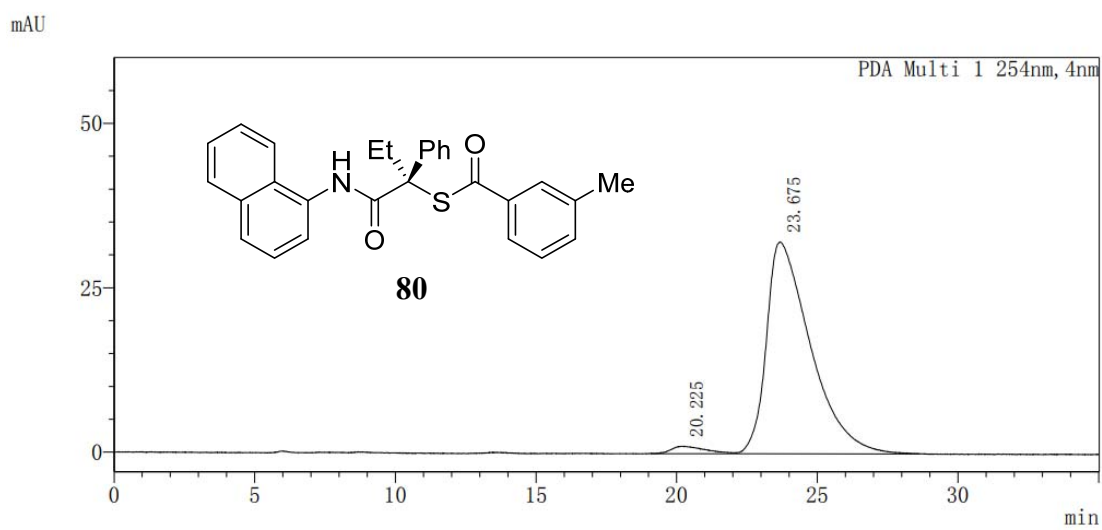

Peak Table

PDA Ch1 254nm

| Peak# | Ret. Time | Area    | Area%  |
|-------|-----------|---------|--------|
| 1     | 20.225    | 97047   | 2.685  |
| 2     | 23.675    | 3516725 | 97.315 |

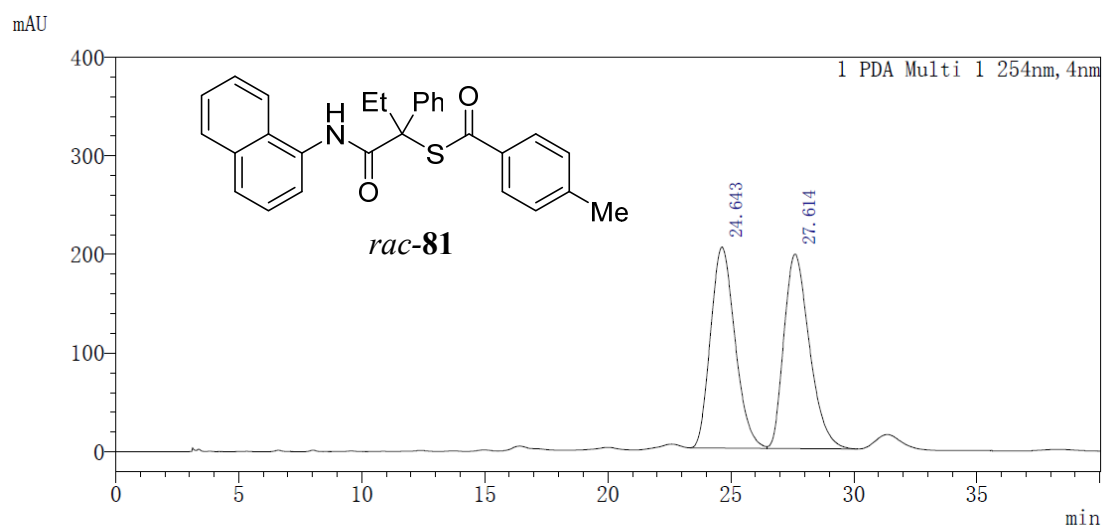

PDA Ch1 254nm

| T      | Hight  | Area     | Area%  |
|--------|--------|----------|--------|
| 24.643 | 203841 | 14153464 | 49.798 |
| 27.614 | 197139 | 14268054 | 50.202 |

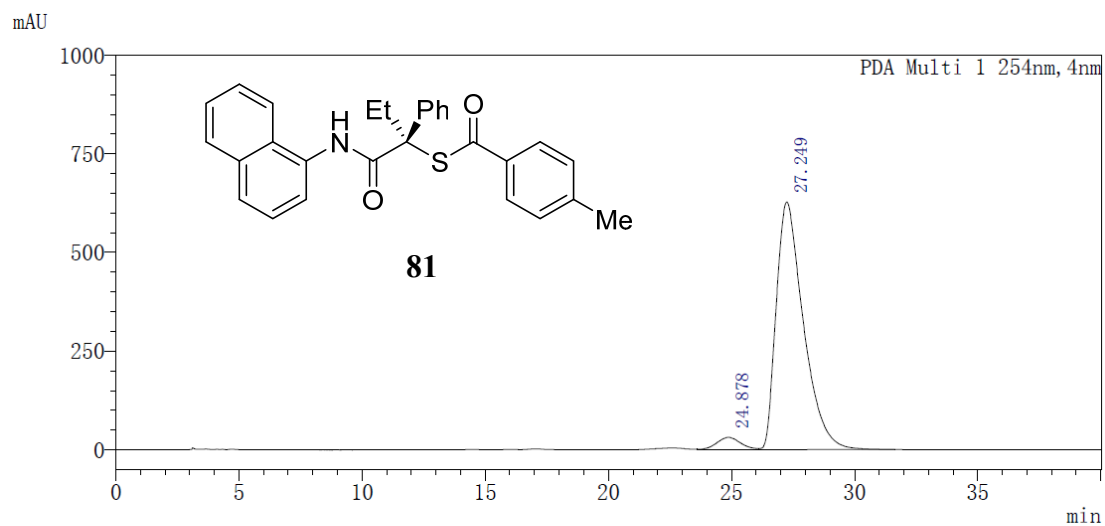

PDA Ch1 254nm

| T      | Hight  | Area     | Area%  |
|--------|--------|----------|--------|
| 24.878 | 30921  | 2084672  | 4.146  |
| 27.249 | 627362 | 48199881 | 95.854 |

mAU

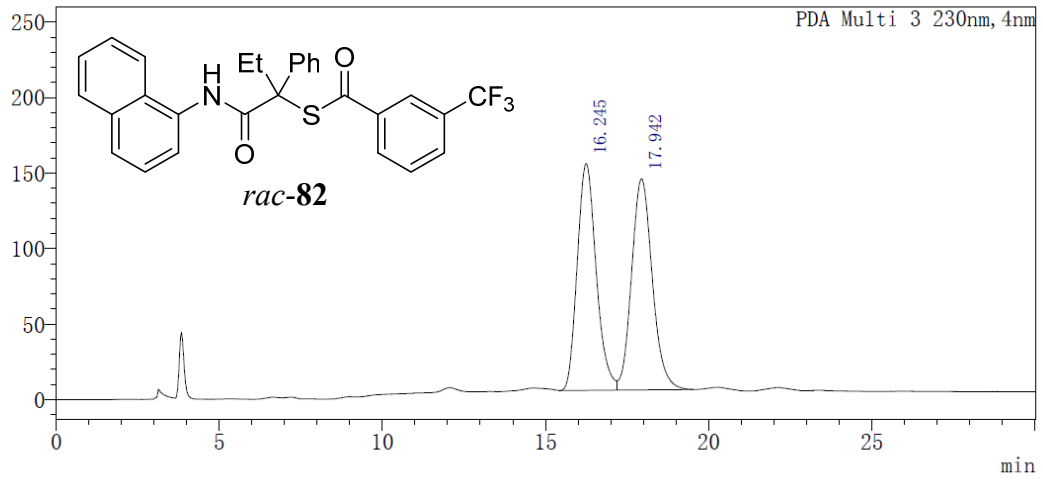

PDA Ch3 230nm

| T      | Hight  | Area    | Area%  |
|--------|--------|---------|--------|
| 16.245 | 150129 | 6069049 | 49.573 |
| 17.942 | 139732 | 6173721 | 50.427 |

mAU

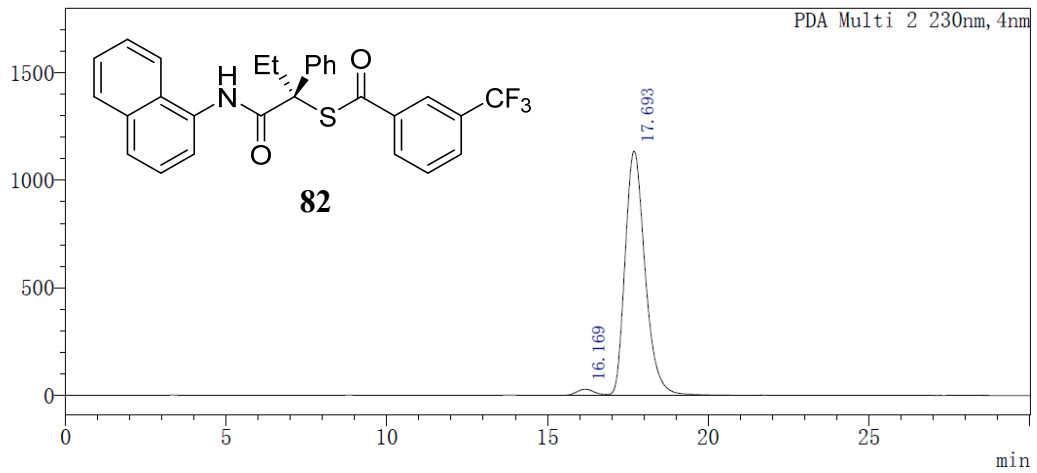

PDA Ch2 230nm

| T      | Hight   | Area     | Area%  |
|--------|---------|----------|--------|
| 16.169 | 28944   | 1095505  | 2.179  |
| 17.693 | 1136385 | 49190891 | 97.821 |



mAU

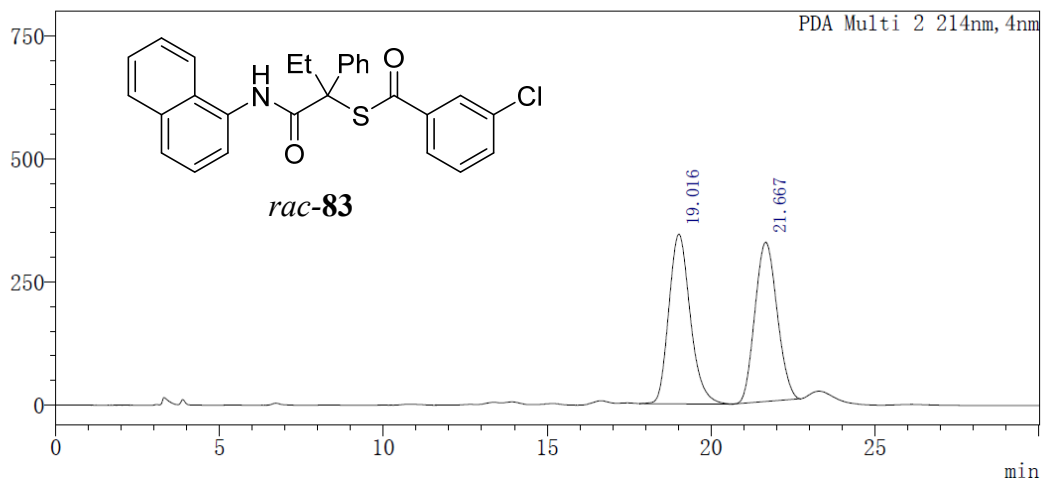

PDA Ch2 214nm

| T      | Hight  | Area     | Area%  |
|--------|--------|----------|--------|
| 19.016 | 344495 | 15655560 | 50.624 |
| 21.667 | 323551 | 15269473 | 49.376 |

mAU

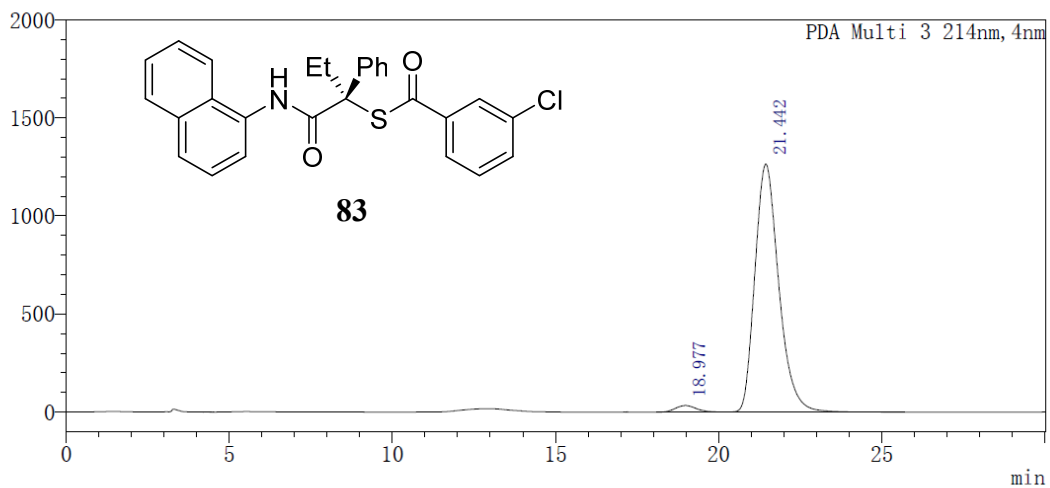

PDA Ch3 214nm

| T      | Hight   | Area     | Area%  |
|--------|---------|----------|--------|
| 18.977 | 34049   | 1562057  | 2.365  |
| 21.442 | 1266399 | 64481374 | 97.635 |

mAU

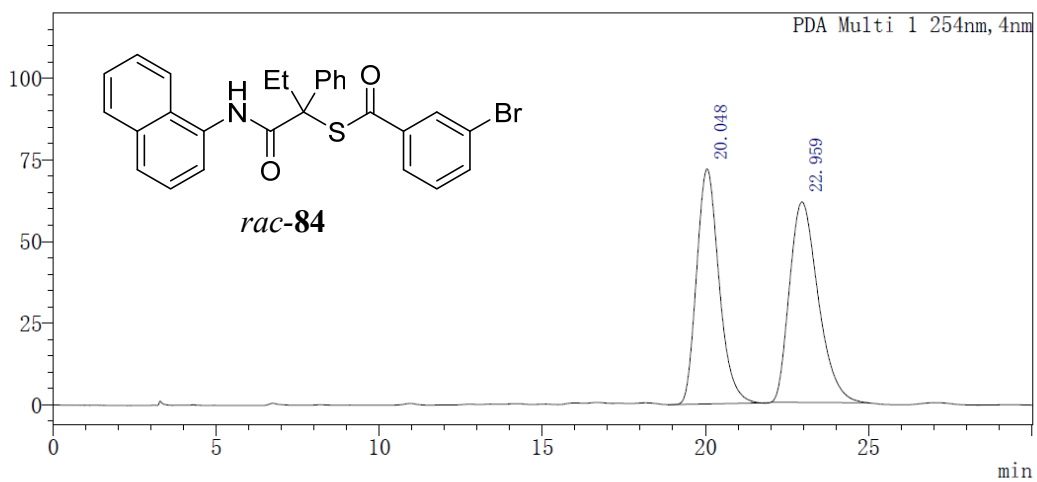

PDA Ch1 254nm

| T      | Hight | Area    | Area%  |
|--------|-------|---------|--------|
| 20.048 | 71930 | 3445433 | 47.831 |
| 22.959 | 61383 | 3757847 | 52.169 |

mAU

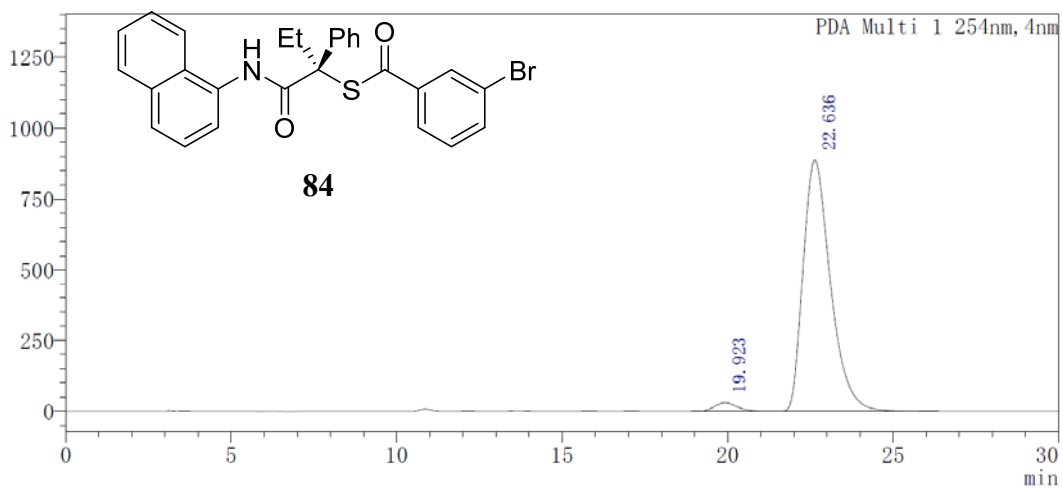

PDA Ch1 254nm

| T      | Hight  | Area     | Area%  |
|--------|--------|----------|--------|
| 19.923 | 30835  | 1541098  | 2.929  |
| 22.636 | 887479 | 51077690 | 97.071 |

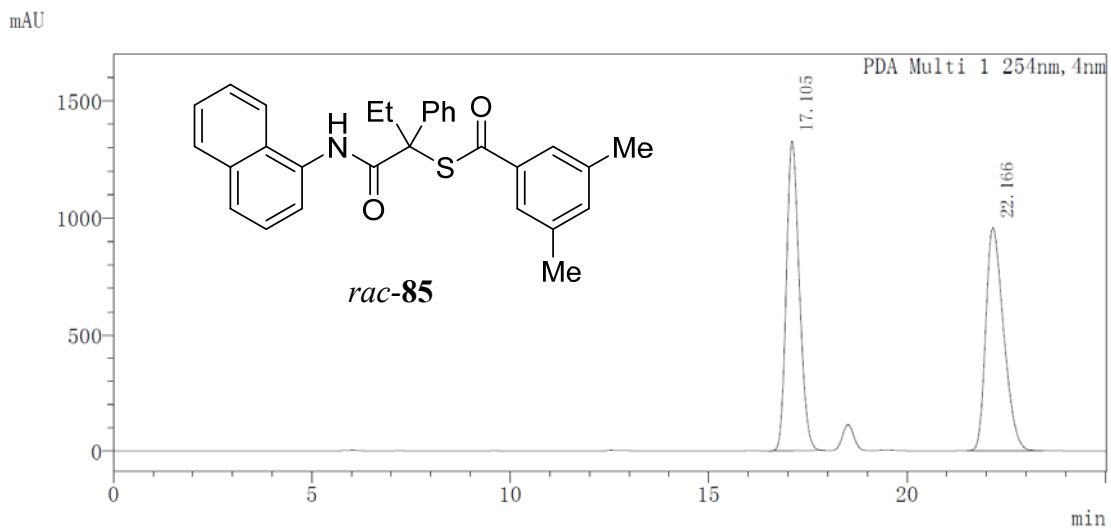

Peak Table

PDA Ch1 254nm

| Peak# | Ret. Time | Area     | Area%  |
|-------|-----------|----------|--------|
| 1     | 17.105    | 30284686 | 50.187 |
| 2     | 22.166    | 30058489 | 49.813 |

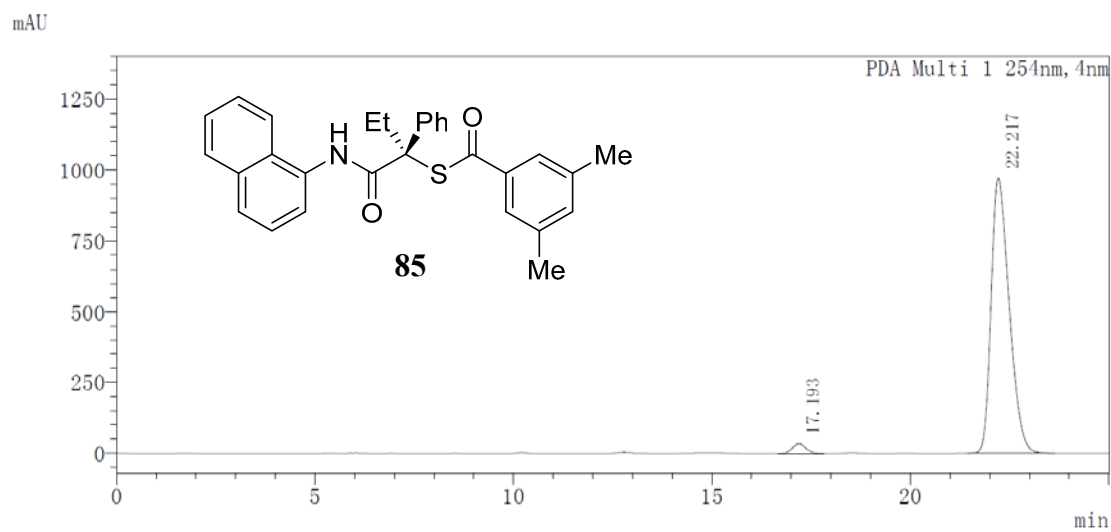

Peak Table

PDA Ch1 254nm

| Peak# | Ret. Time | Area     | Area%  |
|-------|-----------|----------|--------|
| 1     | 17.193    | 769141   | 2.445  |
| 2     | 22.217    | 30689465 | 97.555 |

mAU

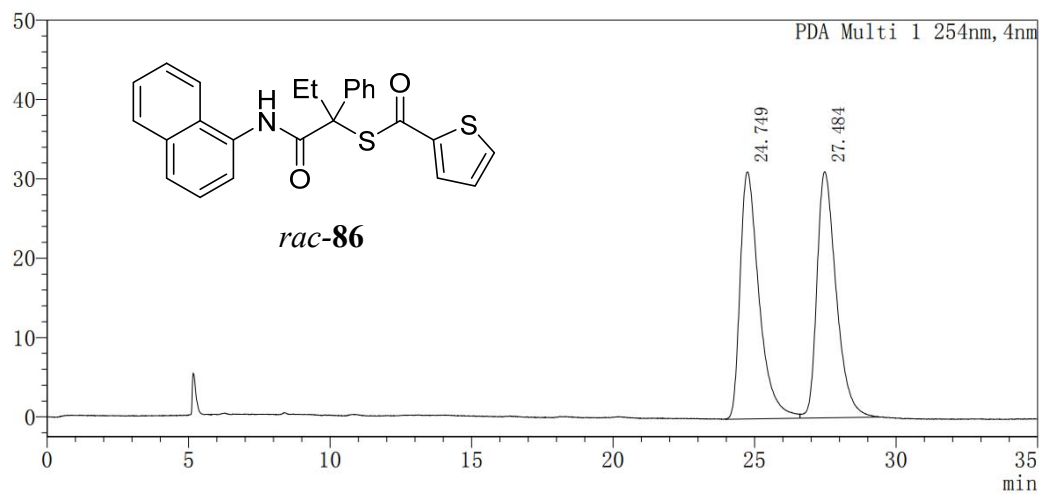

Peak Table

PDA Ch1 254nm

| Peak# | Ret. Time | Area    | Area%  |
|-------|-----------|---------|--------|
| 1     | 24.749    | 1457793 | 49.808 |
| 2     | 27.484    | 1469038 | 50.192 |

mAU

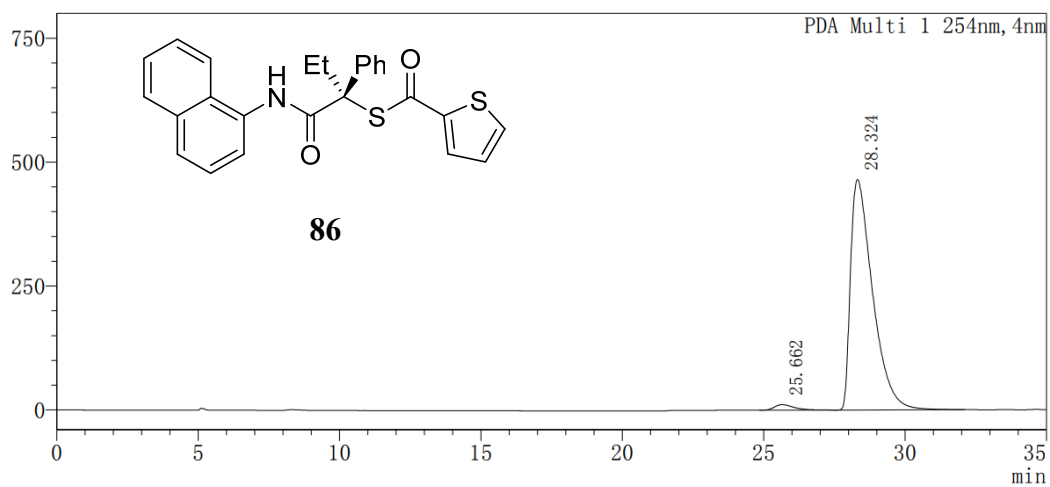

PDA Ch1 254nm

| T      | Hight  | Area     | Area%  |
|--------|--------|----------|--------|
| 25.662 | 11130  | 545562   | 2.112  |
| 28.324 | 464999 | 25285422 | 97.888 |

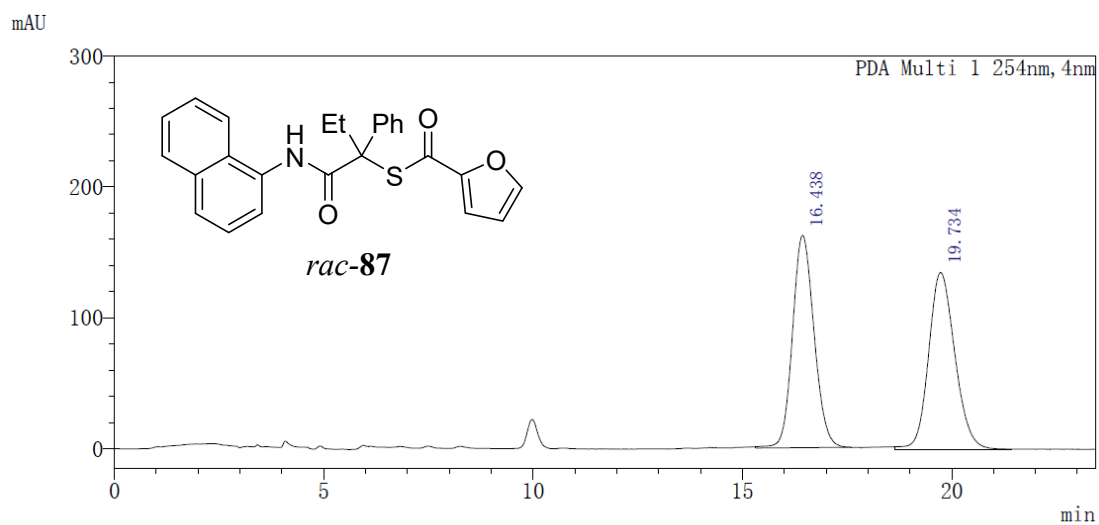

PDA Ch1 254nm

| T      | Hight  | Area    | Area%  |
|--------|--------|---------|--------|
| 16.438 | 162145 | 5802024 | 49.666 |
| 19.734 | 135039 | 5880076 | 50.334 |

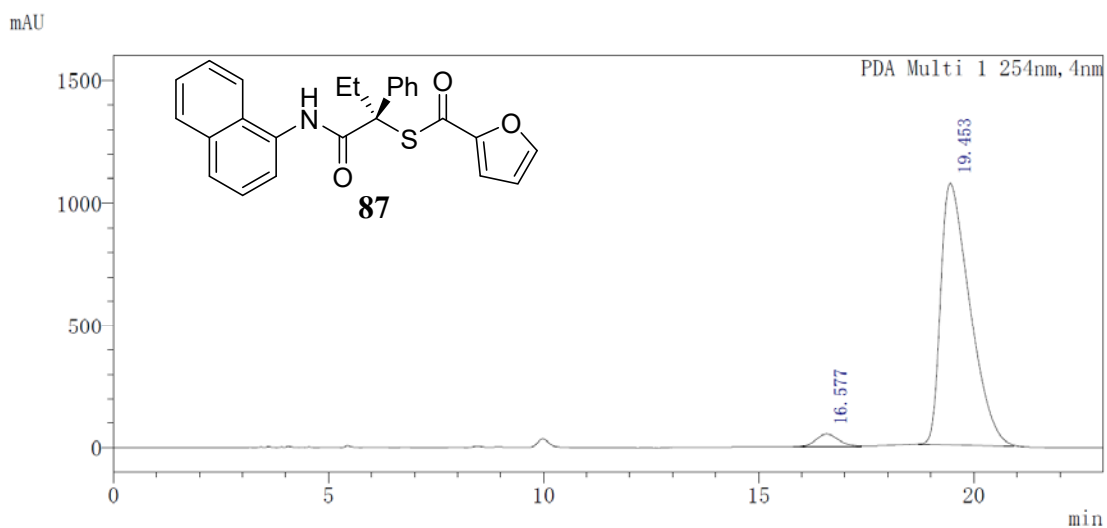

PDA Ch1 254nm

| T      | Hight   | Area     | Area%  |
|--------|---------|----------|--------|
| 16.577 | 53274   | 1990102  | 3.775  |
| 19.453 | 1070660 | 50725012 | 96.225 |

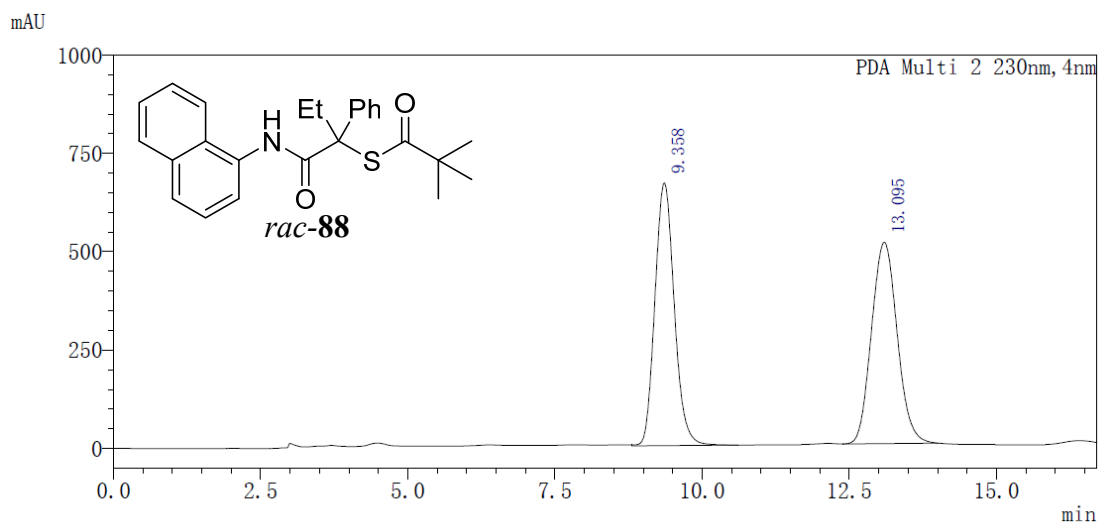

PDA Ch2 230nm

| T      | Hight  | Area     | Area%  |
|--------|--------|----------|--------|
| 9.358  | 668131 | 15303737 | 49.646 |
| 13.095 | 511963 | 15522271 | 50.354 |

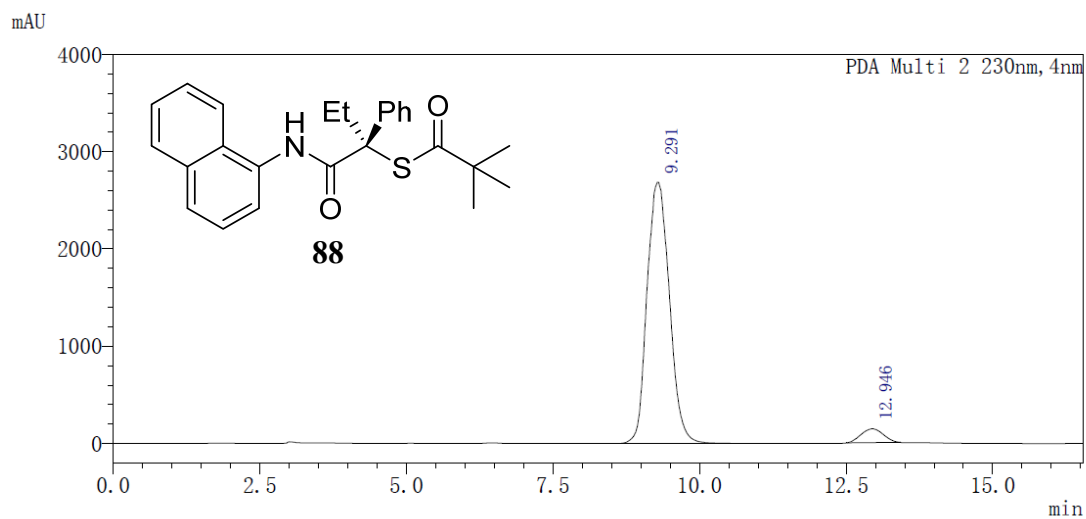

PDA Ch2 230nm

| T      | Hight   | Area     | Area%  |
|--------|---------|----------|--------|
| 9.291  | 2684726 | 71280710 | 95.012 |
| 12.946 | 141491  | 3742143  | 4.988  |

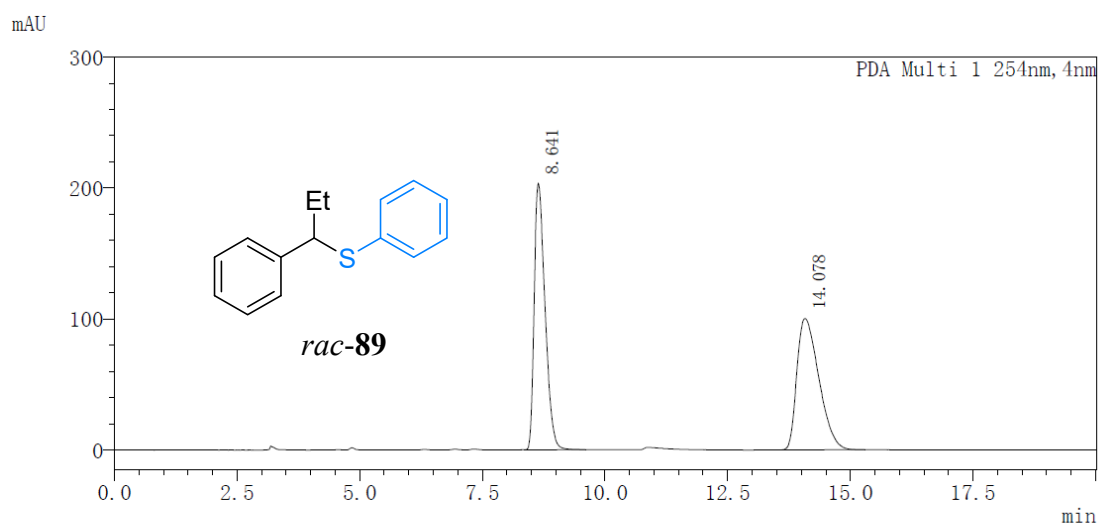

Peak Table

PDA Ch1 254nm

| Peak# | Ret. Time | Area    | Area%  |
|-------|-----------|---------|--------|
| 1     | 8.641     | 3131699 | 50.051 |
| 2     | 14.078    | 3125336 | 49.949 |

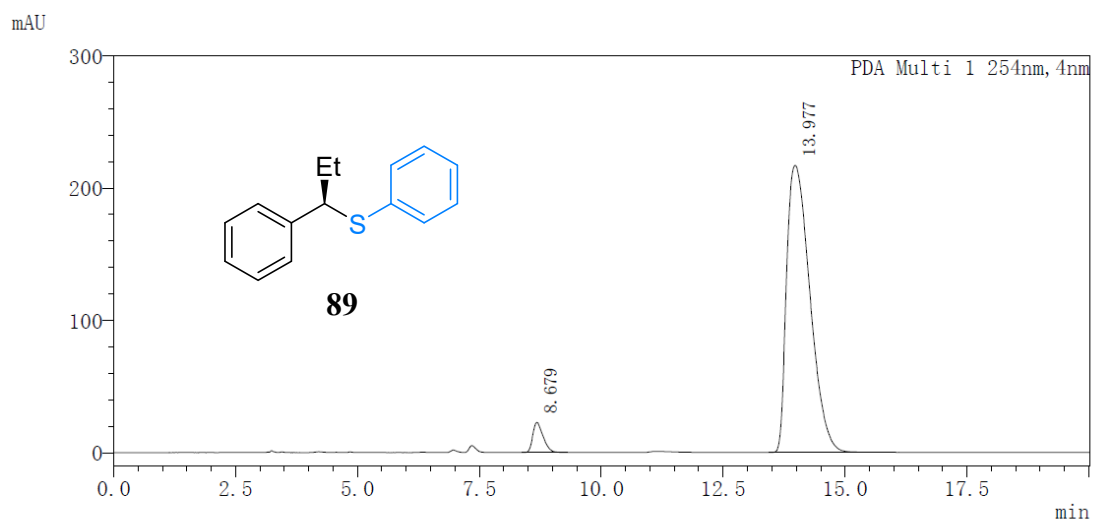

Peak Table

PDA Ch1 254nm

| Peak# | Ret. Time | Area    | Area%  |
|-------|-----------|---------|--------|
| 1     | 8.679     | 340295  | 4.488  |
| 2     | 13.977    | 7242389 | 95.512 |

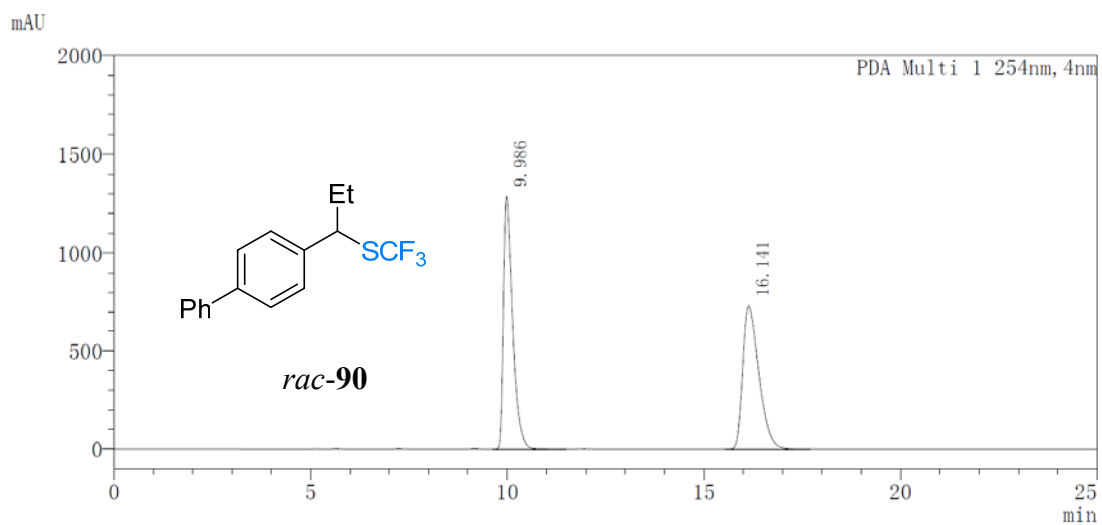

PDA Ch1 254nm

| T      | Hight   | Area     | Area%  |
|--------|---------|----------|--------|
| 9.986  | 1288359 | 20927958 | 50.052 |
| 16.141 | 733994  | 20884215 | 49.948 |

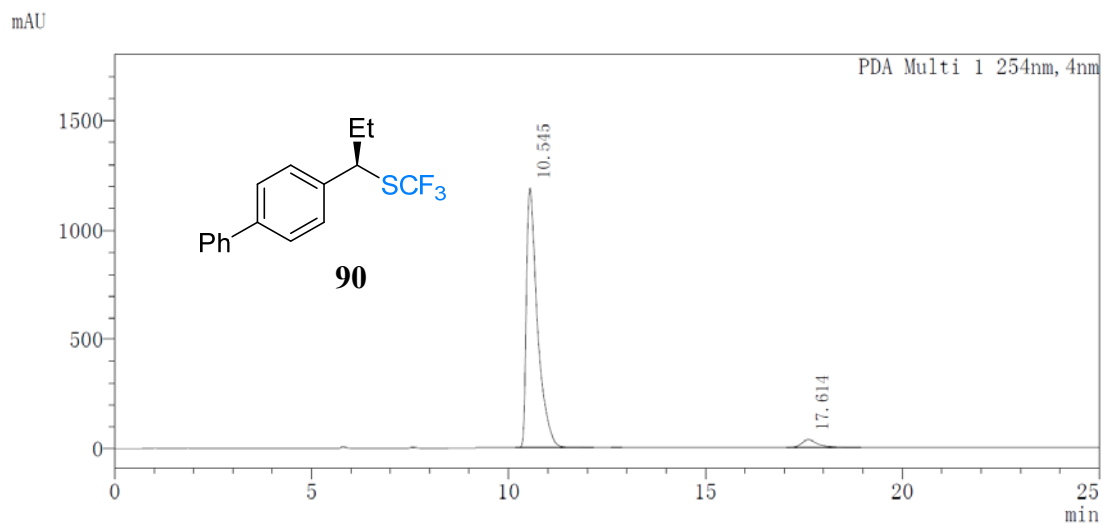

PDA Ch1 254nm

| T      | Hight   | Area     | Area%  |
|--------|---------|----------|--------|
| 10.545 | 1186227 | 23220545 | 95.653 |
| 17.614 | 37177   | 1055360  | 4.347  |



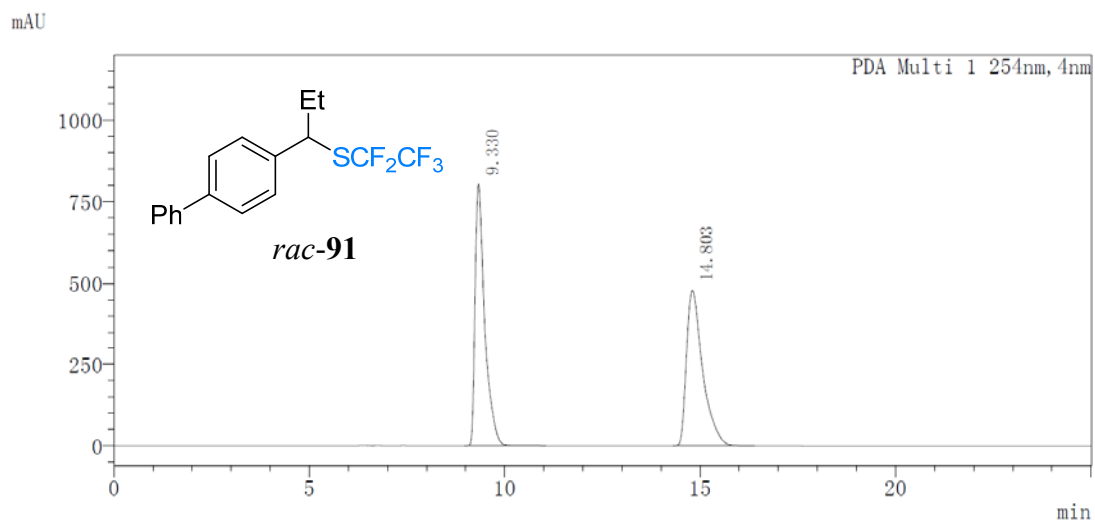

Peak Table

PDA Ch1 254nm

| Peak# | Ret. Time | Area     | Area%  |
|-------|-----------|----------|--------|
| 1     | 9.330     | 13766033 | 50.028 |
| 2     | 14.803    | 13750745 | 49.972 |

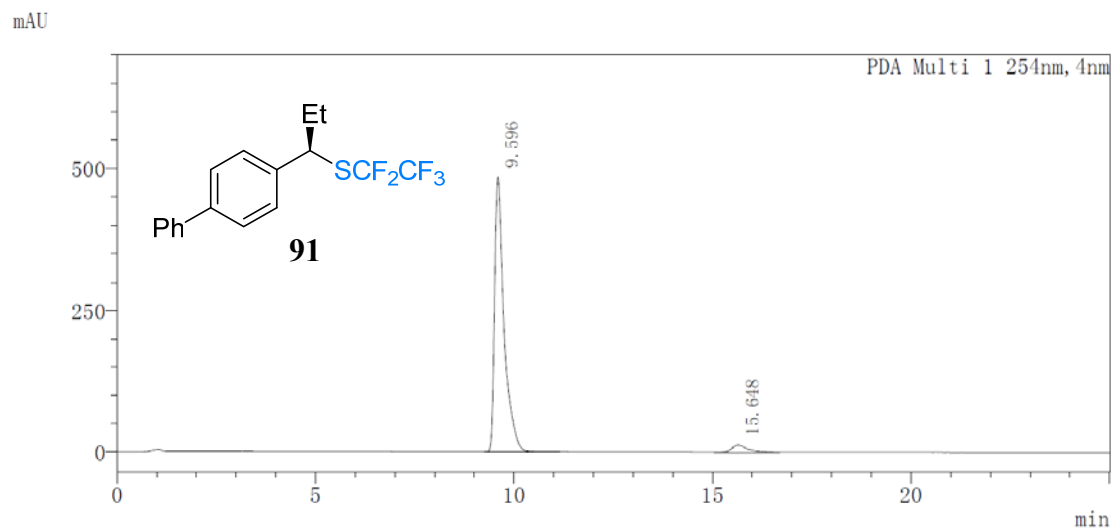

Peak Table

PDA Ch1 254nm

| Peak# | Ret. Time | Area    | Area%  |
|-------|-----------|---------|--------|
| 1     | 9.596     | 8033868 | 95.870 |
| 2     | 15.648    | 346105  | 4.130  |

mAU

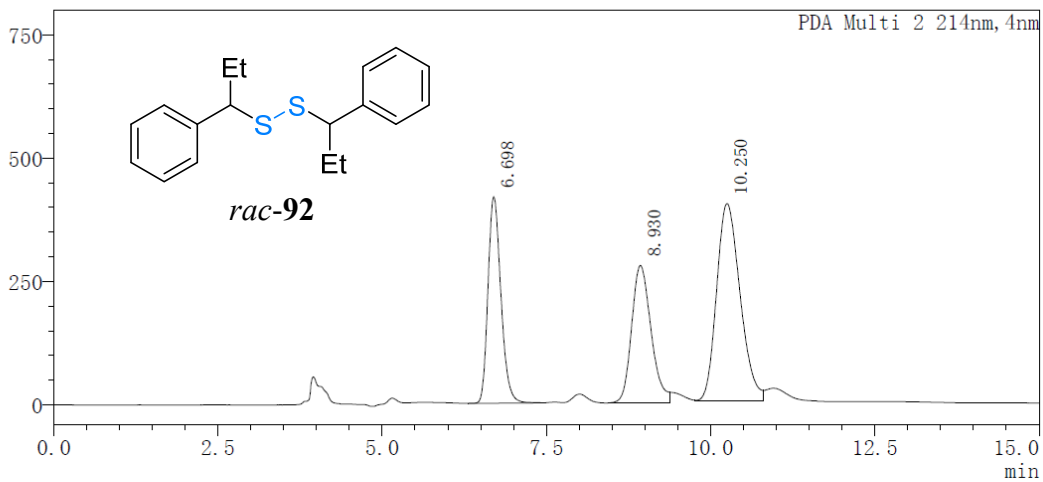

PDA Ch2 214nm

| T      | Hight  | Area    | Area%  |
|--------|--------|---------|--------|
| 6.698  | 418806 | 5732286 | 26.778 |
| 8.930  | 279018 | 5757785 | 26.898 |
| 10.250 | 399431 | 9916295 | 46.324 |

mAU

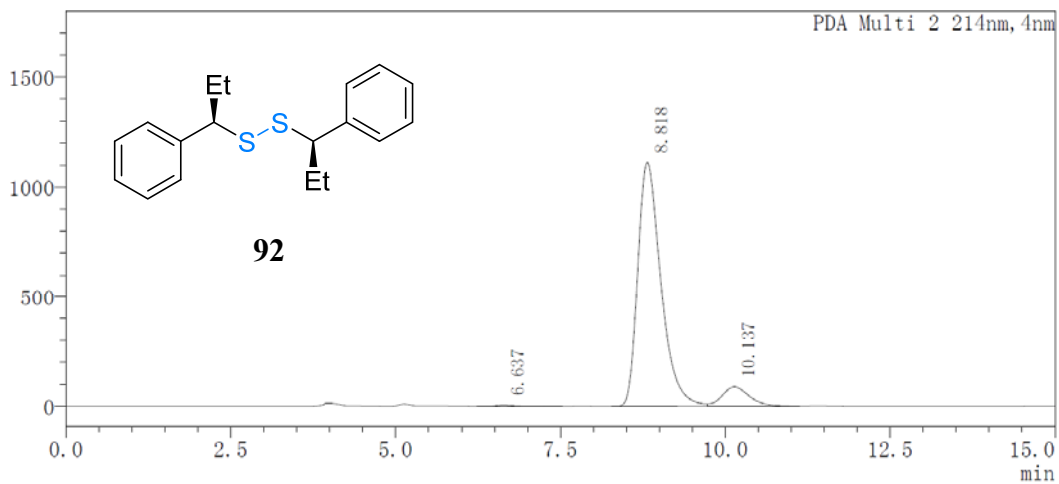

PDA Ch2 214nm

| T      | Hight   | Area     | Area%  |
|--------|---------|----------|--------|
| 6.637  | 5899    | 118100   | 0.396  |
| 8.818  | 1112107 | 27186171 | 91.189 |
| 10.137 | 87769   | 2508836  | 8.415  |

mAU

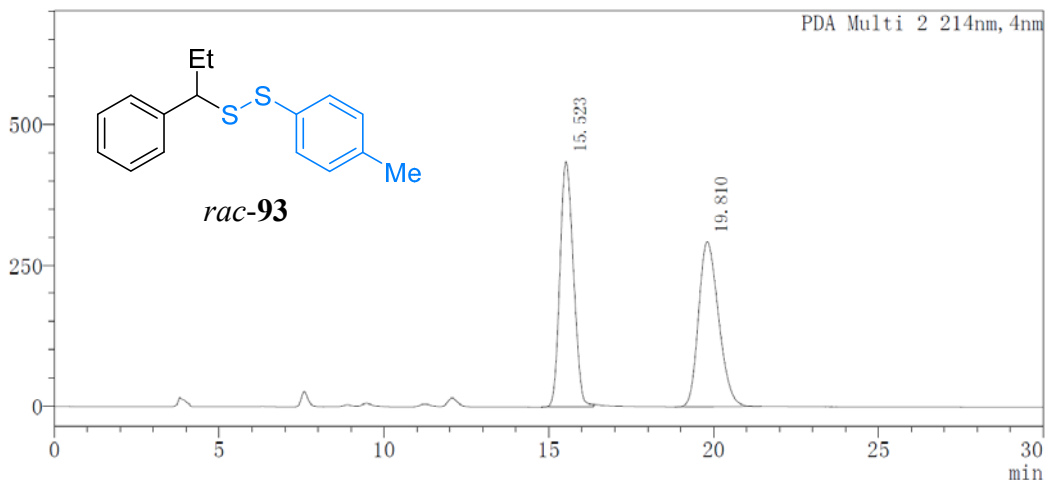

PDA Ch2 214nm

| T      | Hight  | Area     | Area%  |
|--------|--------|----------|--------|
| 15.523 | 434274 | 12397993 | 50.053 |
| 19.810 | 292959 | 12371532 | 49.947 |

mAU

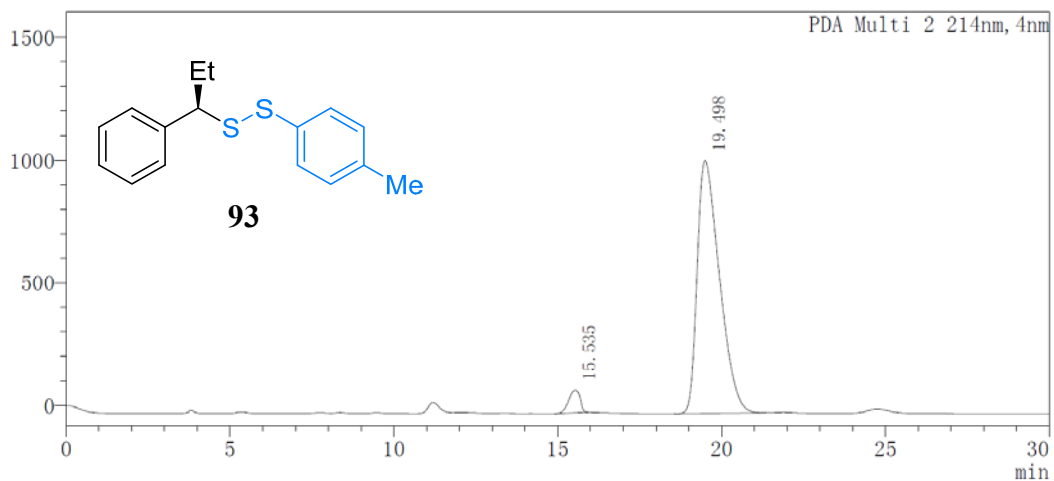

PDA Ch2 214nm

| T      | Hight   | Area     | Area%  |
|--------|---------|----------|--------|
| 15.535 | 93013   | 2260320  | 4.438  |
| 19.498 | 1029215 | 48668117 | 95.562 |

mAU

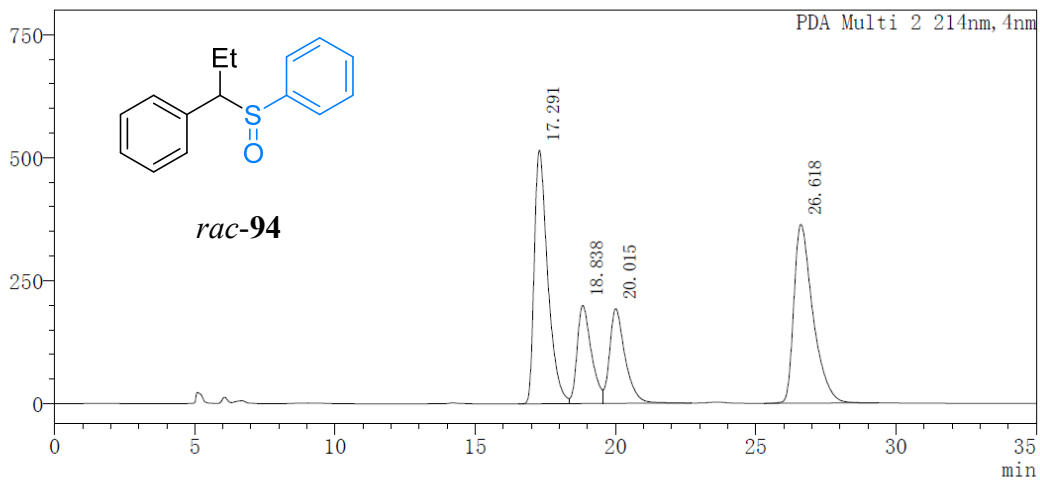

PDA Ch2 214nm

| T      | Hight  | Area     | Area%  |
|--------|--------|----------|--------|
| 17.291 | 514859 | 17218035 | 35.244 |
| 18.838 | 199311 | 7040740  | 14.412 |
| 20.015 | 192429 | 7422621  | 15.194 |
| 26.618 | 363244 | 17172036 | 35.150 |

mAU

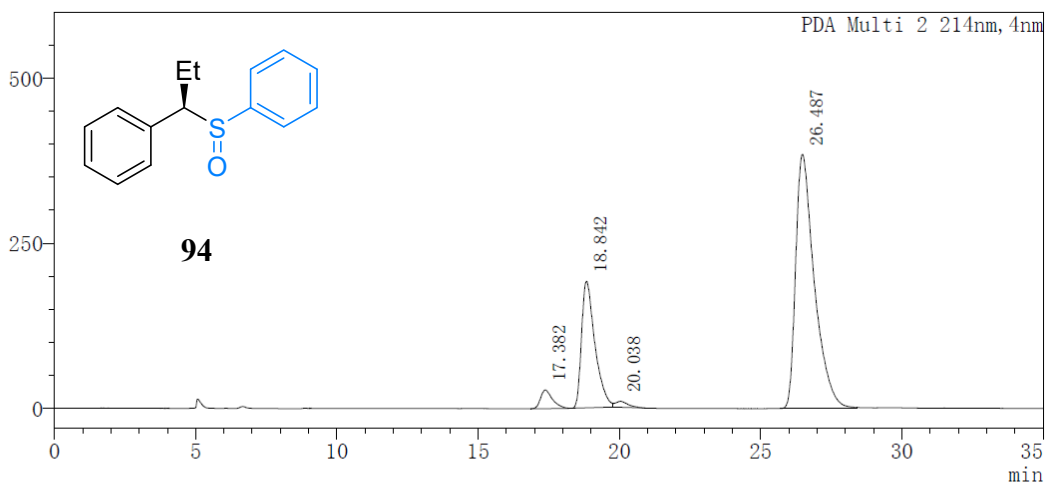

PDA Ch2 214nm

| T      | Hight  | Area     | Area%  |
|--------|--------|----------|--------|
| 17.382 | 28281  | 839026   | 3.336  |
| 18.842 | 191820 | 6298604  | 25.046 |
| 20.038 | 8882   | 287179   | 1.142  |
| 26.487 | 384871 | 17722909 | 70.475 |

mAU

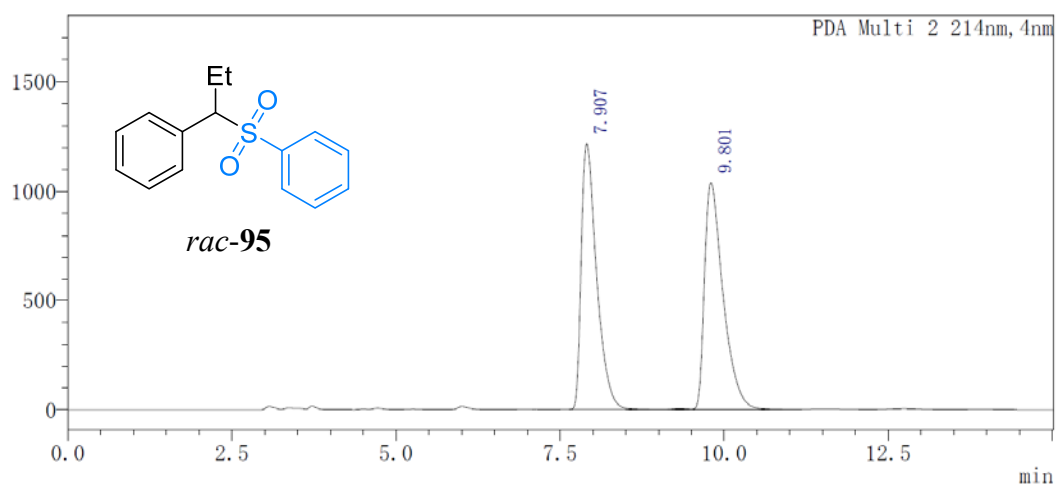

PDA Ch2 214nm

| T     | Hight   | Area     | Area%  |
|-------|---------|----------|--------|
| 7.907 | 1214541 | 19789818 | 49.164 |
| 9.801 | 1037398 | 20462937 | 50.836 |

mAU

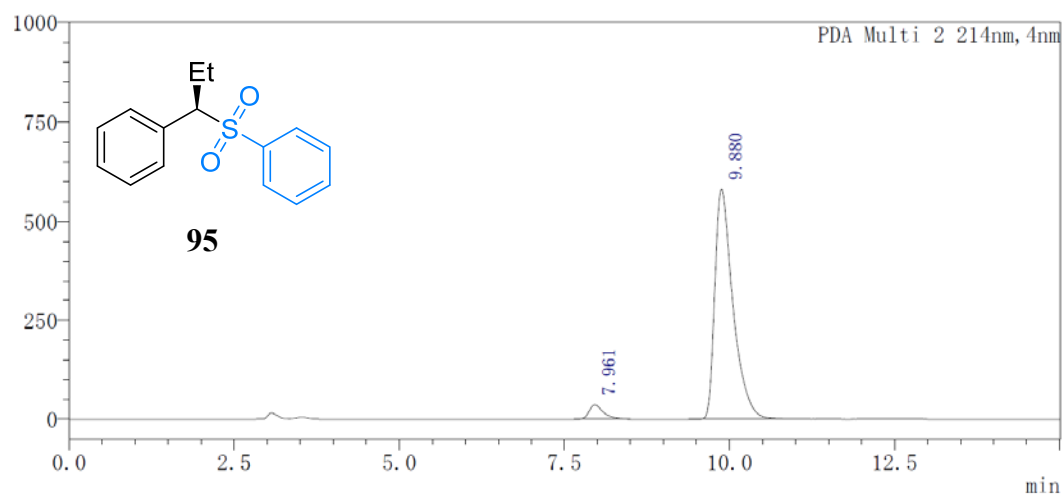

PDA Ch2 214nm

| T     | Hight  | Area     | Area%  |
|-------|--------|----------|--------|
| 7.961 | 37051  | 553977   | 4.731  |
| 9.880 | 581981 | 11156404 | 95.269 |

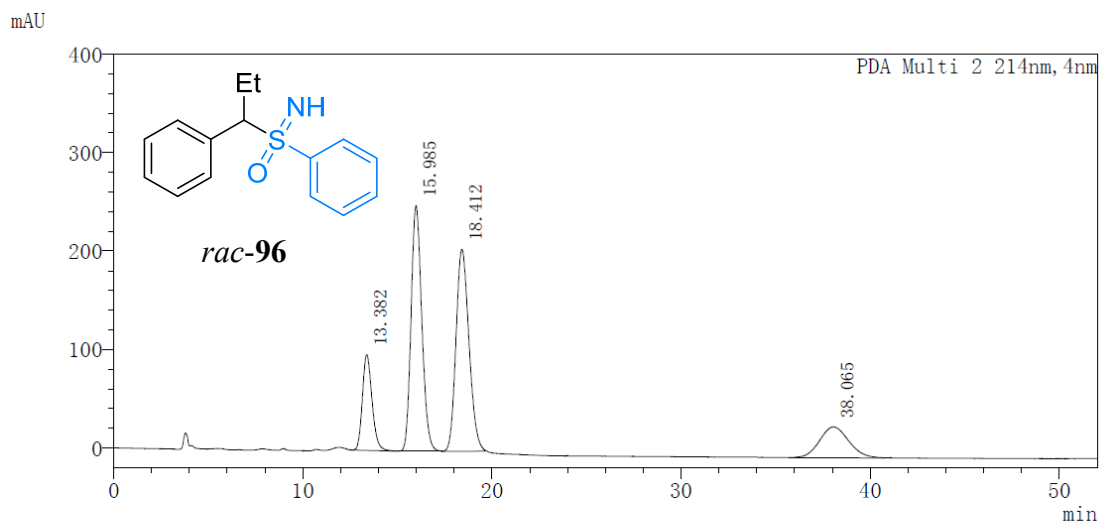

Peak Table

PDA Ch2 214nm

| Peak# | Ret. Time | Area    | Area%  |
|-------|-----------|---------|--------|
| 1     | 13.382    | 3455734 | 13.048 |
| 2     | 15.985    | 9841333 | 37.158 |
| 3     | 18.412    | 9795203 | 36.984 |
| 4     | 38.065    | 3392652 | 12.810 |

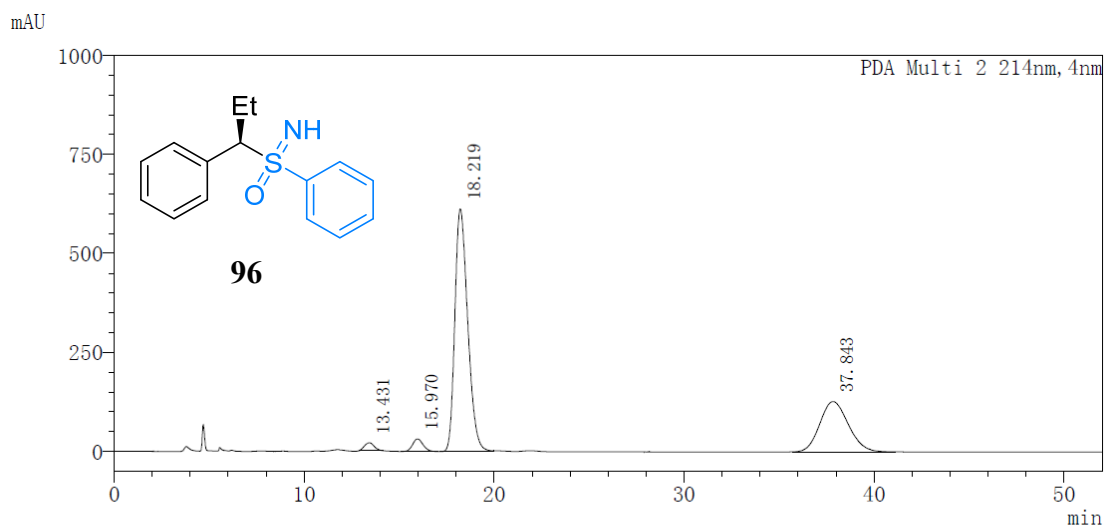

Peak Table

PDA Ch2 214nm

| Peak# | Ret. Time | Area     | Area%  |
|-------|-----------|----------|--------|
| 1     | 13.431    | 715117   | 1.619  |
| 2     | 15.970    | 1256124  | 2.843  |
| 3     | 18.219    | 28903736 | 65.425 |
| 4     | 37.843    | 13303643 | 30.113 |

mAU

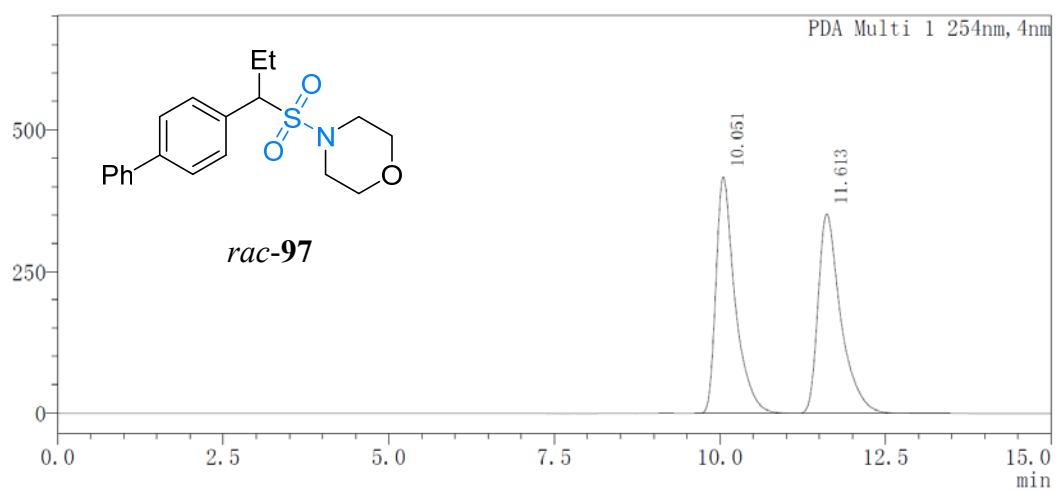

PDA Ch1 254nm

| T      | Hight  | Area    | Area%  |
|--------|--------|---------|--------|
| 10.051 | 416900 | 8398131 | 49.952 |
| 11.613 | 352296 | 8414379 | 50.048 |

mAU

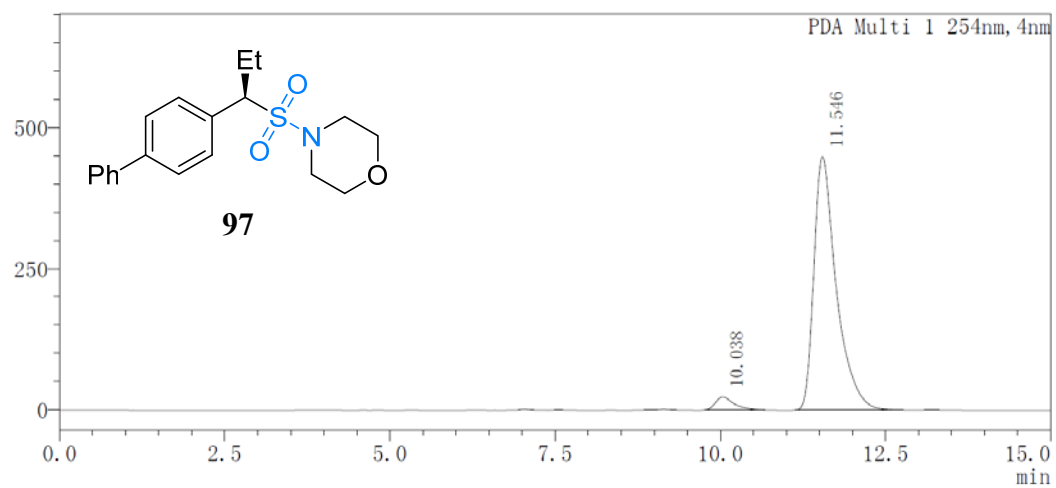

PDA Ch1 254nm

| T      | Hight  | Area     | Area%  |
|--------|--------|----------|--------|
| 10.038 | 23291  | 461349   | 4.183  |
| 11.546 | 448010 | 10566669 | 95.817 |

mAU

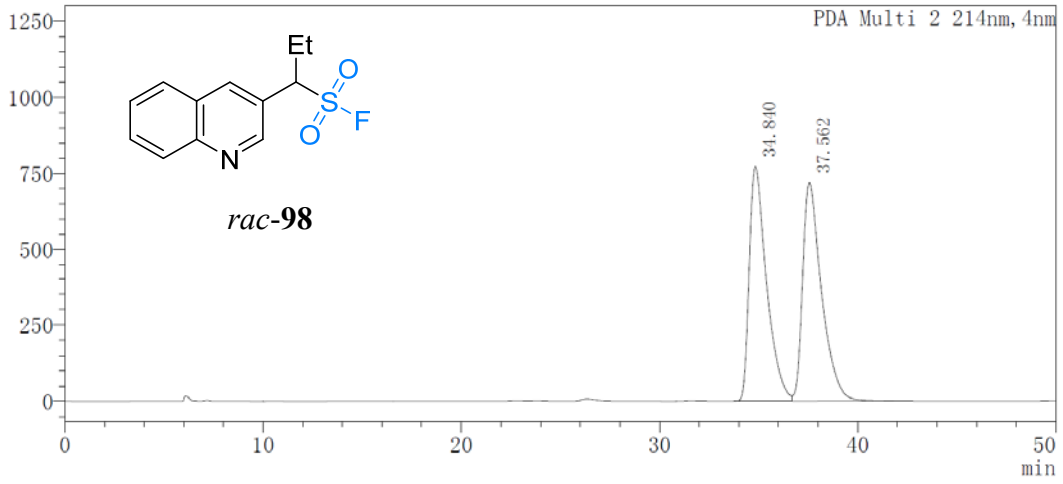

PDA Ch2 214nm

| T      | Hight  | Area     | Area%  |
|--------|--------|----------|--------|
| 34.840 | 771929 | 46942234 | 49.514 |
| 37.562 | 719003 | 47863740 | 50.486 |

mAU

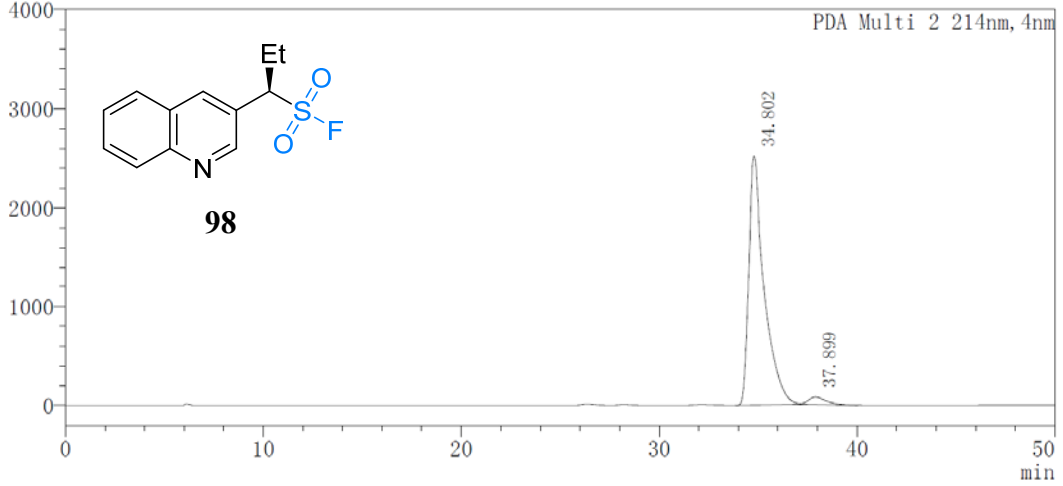

PDA Ch2 214nm

| T      | Hight   | Area      | Area%  |
|--------|---------|-----------|--------|
| 34.802 | 2519072 | 135790328 | 96.479 |
| 37.899 | 79130   | 4955636   | 3.521  |



mAU

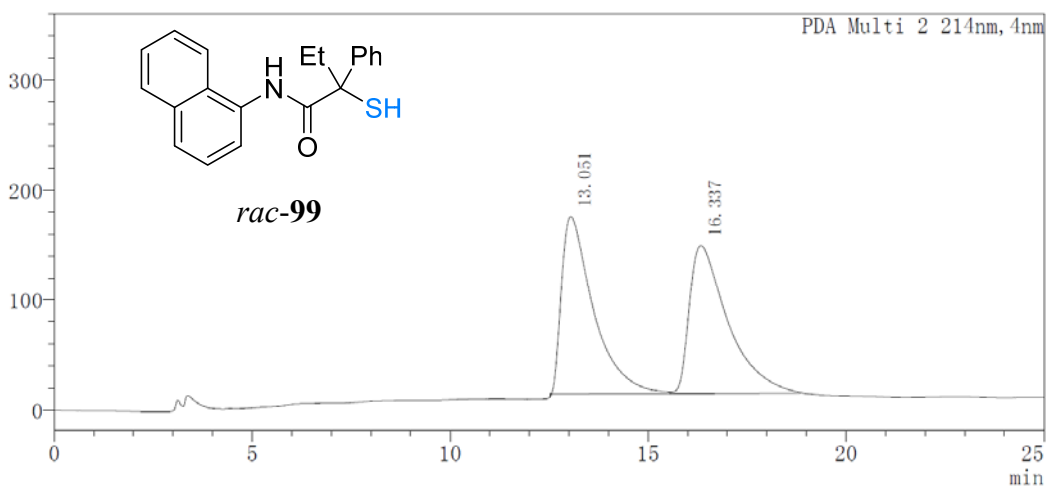

PDA Ch2 214nm

| T      | Hight  | Area    | Area%  |
|--------|--------|---------|--------|
| 13.051 | 161229 | 9036873 | 49.799 |
| 16.337 | 134858 | 9109928 | 50.201 |

mAU

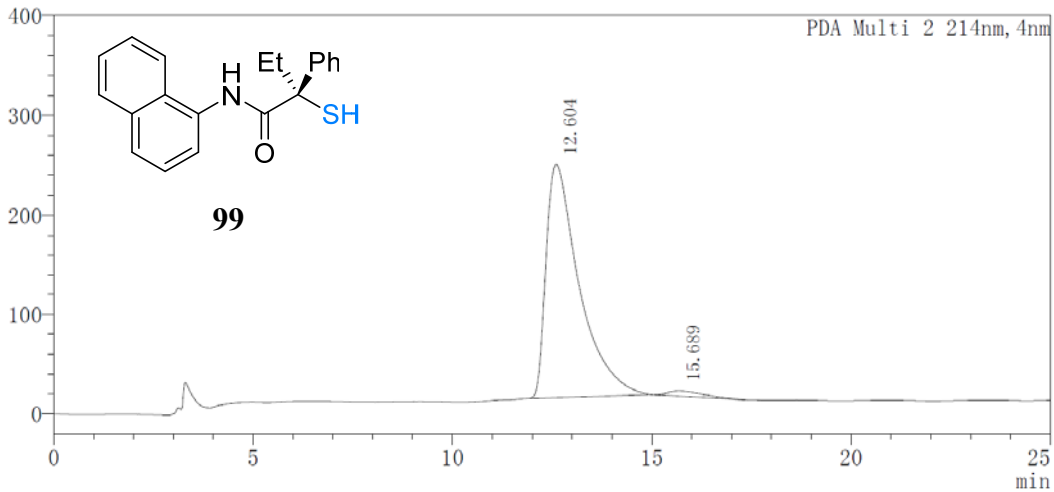

PDA Ch2 214nm

| T      | Hight  | Area     | Area%  |
|--------|--------|----------|--------|
| 12.604 | 234601 | 13552525 | 97.571 |
| 15.689 | 5472   | 337332   | 2.429  |

mAU

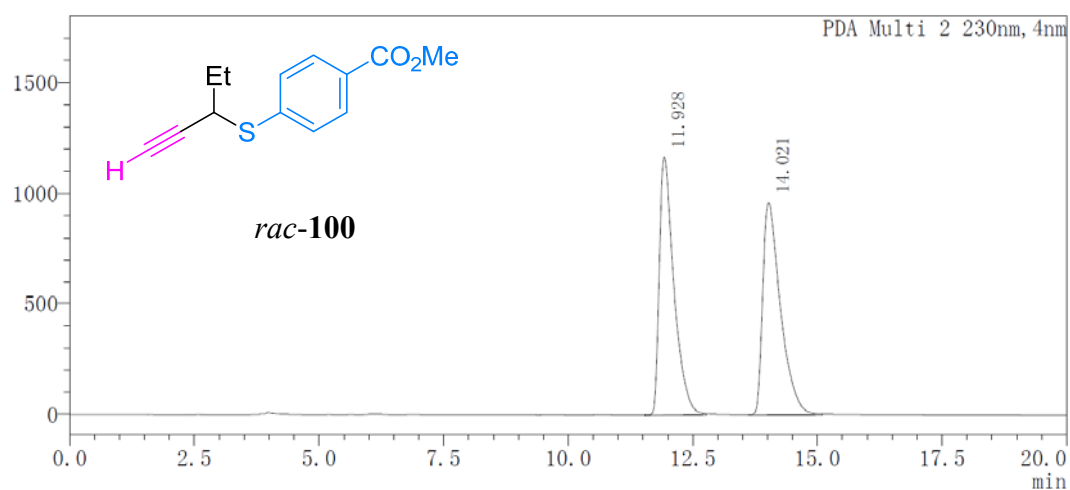

PDA Ch2 230nm

| T      | Hight   | Area     | Area%  |
|--------|---------|----------|--------|
| 11.928 | 1166215 | 23767531 | 49.956 |
| 14.021 | 960646  | 23808924 | 50.044 |

mAU

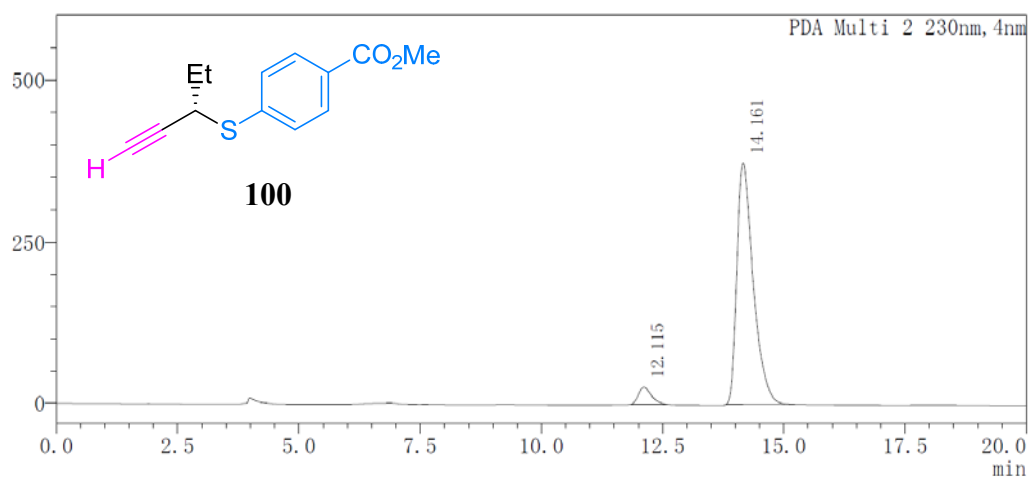

PDA Ch2 230nm

| T      | Hight  | Area    | Area%  |
|--------|--------|---------|--------|
| 12.115 | 26419  | 478091  | 5.178  |
| 14.161 | 373536 | 8754947 | 94.822 |

mAU

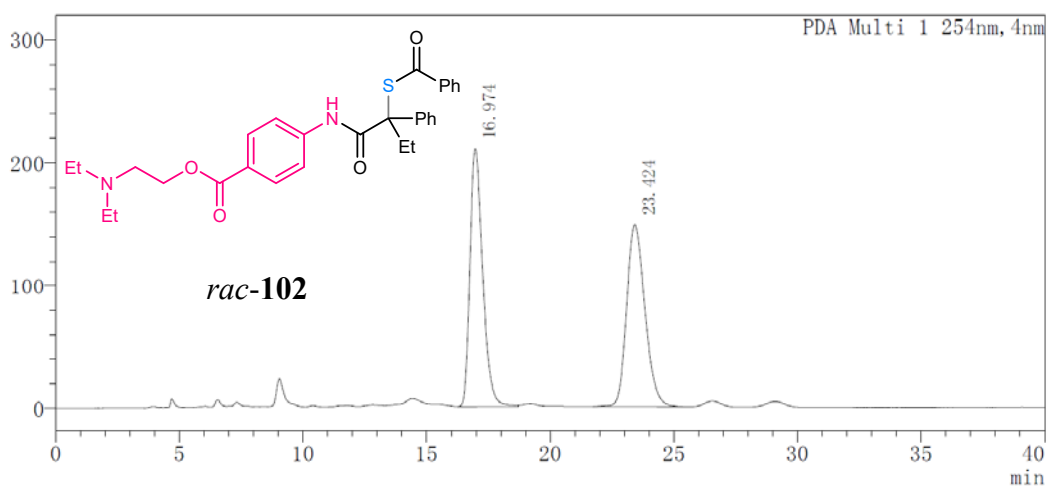

PDA Ch1 254nm

| T      | Hight  | Area    | Area%  |
|--------|--------|---------|--------|
| 16.974 | 210172 | 7549285 | 49.717 |
| 23.424 | 148599 | 7635268 | 50.283 |

mAU

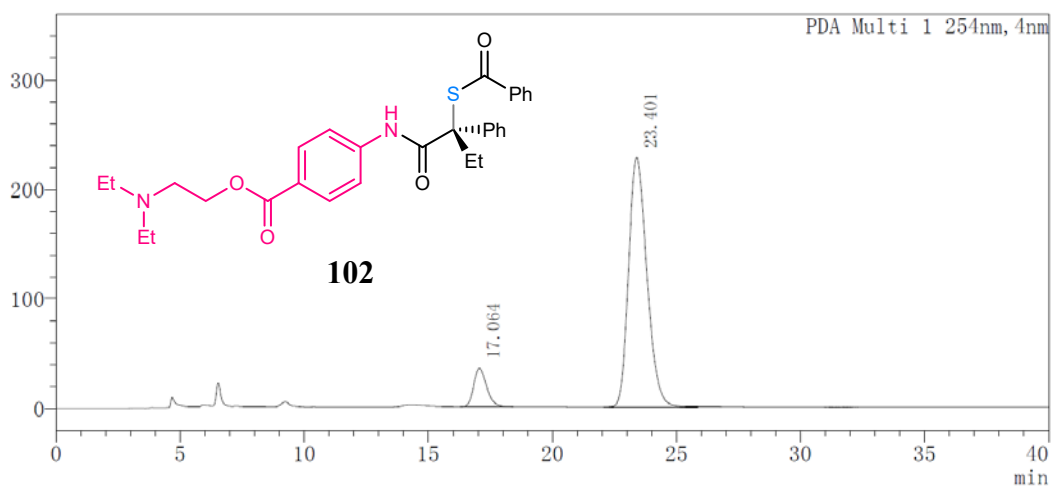

PDA Ch1 254nm

| T      | Hight  | Area     | Area%  |
|--------|--------|----------|--------|
| 17.064 | 34919  | 1263566  | 9.743  |
| 23.401 | 228113 | 11705287 | 90.257 |

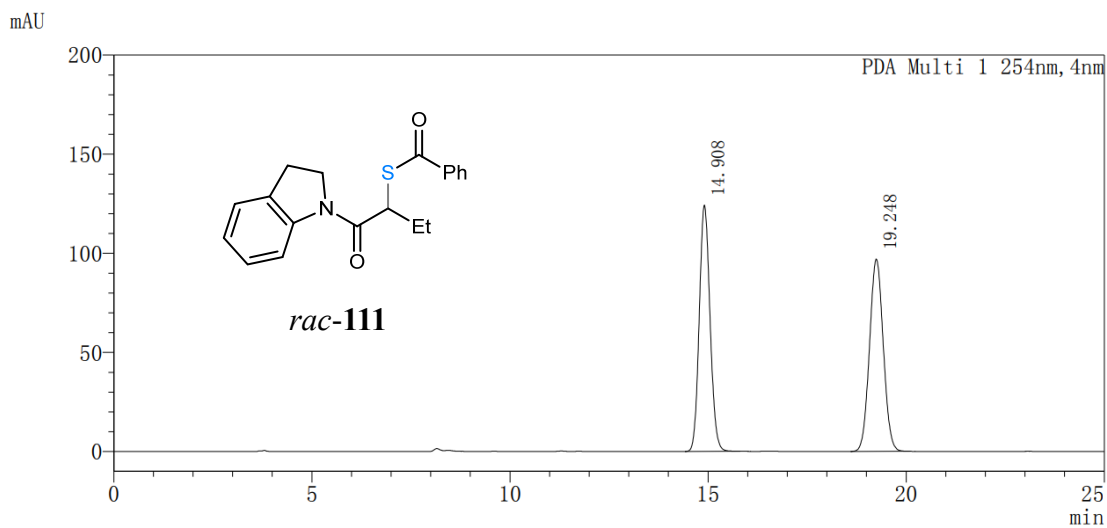

PDA Ch1 254nm

| T      | Hight  | Area    | Area%  |
|--------|--------|---------|--------|
| 14.908 | 124268 | 2349324 | 50.044 |
| 19.248 | 96985  | 2345233 | 49.956 |

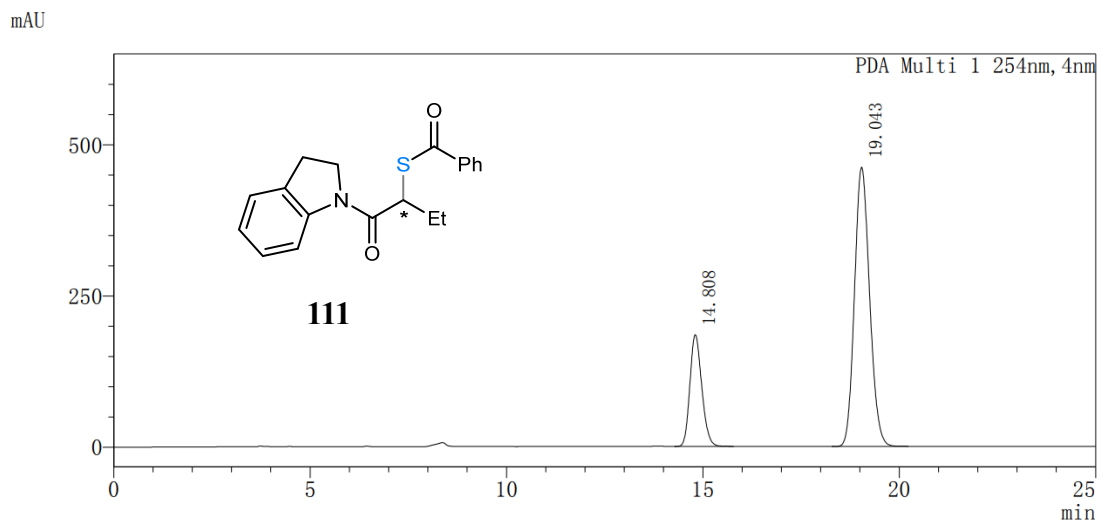

PDA Ch1 254nm

| T      | Hight  | Area     | Area%  |
|--------|--------|----------|--------|
| 14.808 | 184442 | 3874071  | 23.878 |
| 19.043 | 461333 | 12350262 | 76.122 |

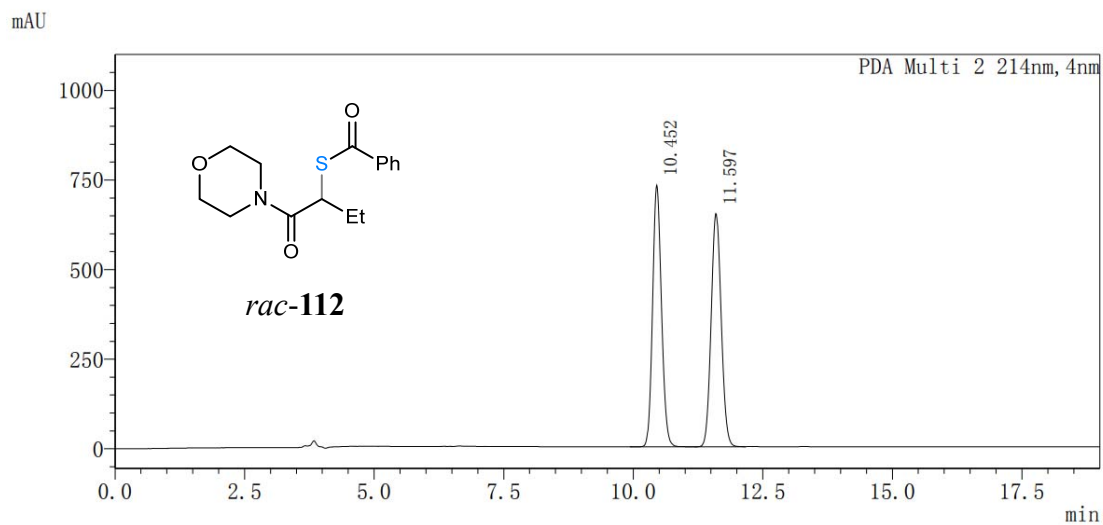

Peak Table

PDA Ch2 214nm

| Peak# | Ret. Time | Area    | Area%  |
|-------|-----------|---------|--------|
| 1     | 10.452    | 8806726 | 50.179 |
| 2     | 11.597    | 8743977 | 49.821 |

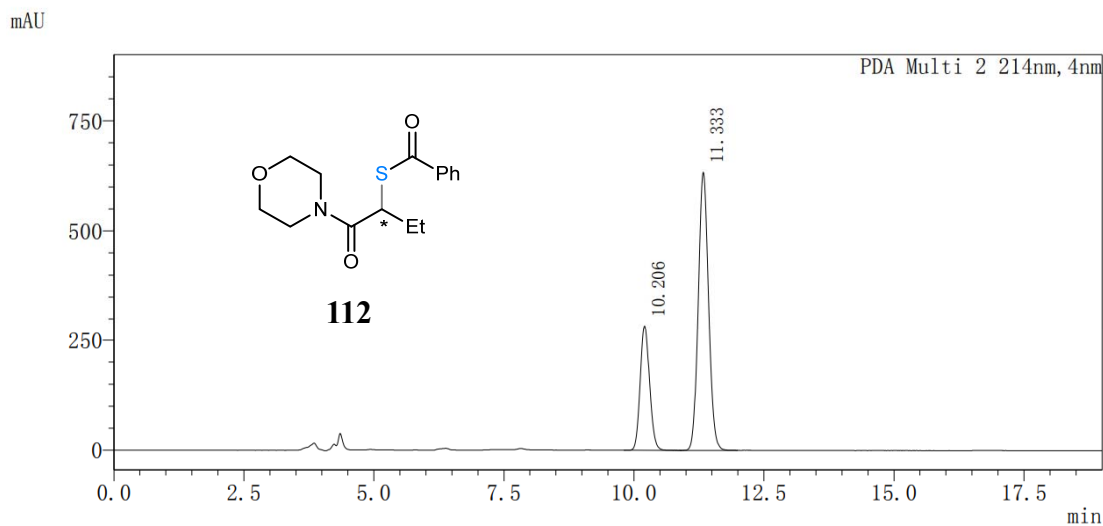

Peak Table

PDA Ch2 214nm

| Peak# | Ret. Time | Area    | Area%  |
|-------|-----------|---------|--------|
| 1     | 10.206    | 3558194 | 28.903 |
| 2     | 11.333    | 8752604 | 71.097 |

mAU

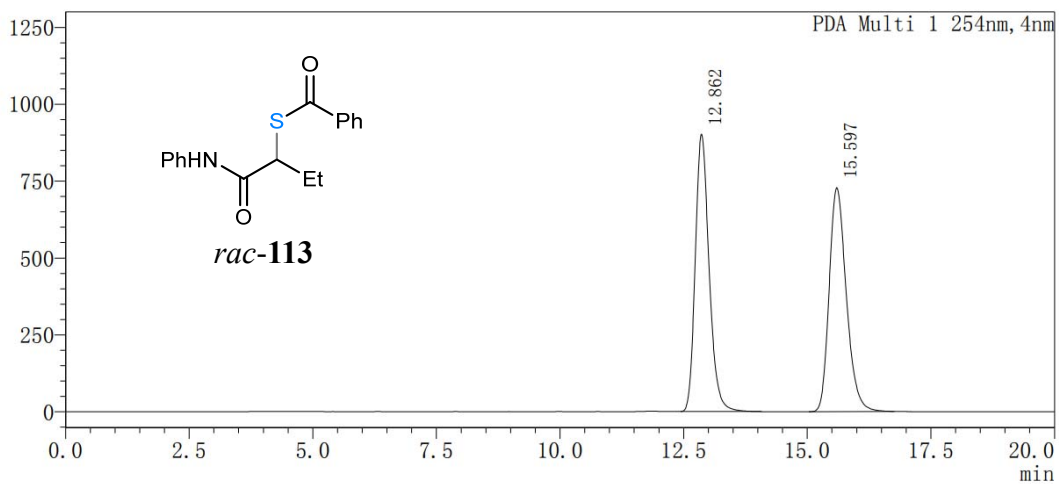

Peak Table

PDA Ch1 254nm

| Peak# | Ret. Time | Area     | Area%  |
|-------|-----------|----------|--------|
| 1     | 12.862    | 17535425 | 49.955 |
| 2     | 15.597    | 17567353 | 50.045 |

mAU

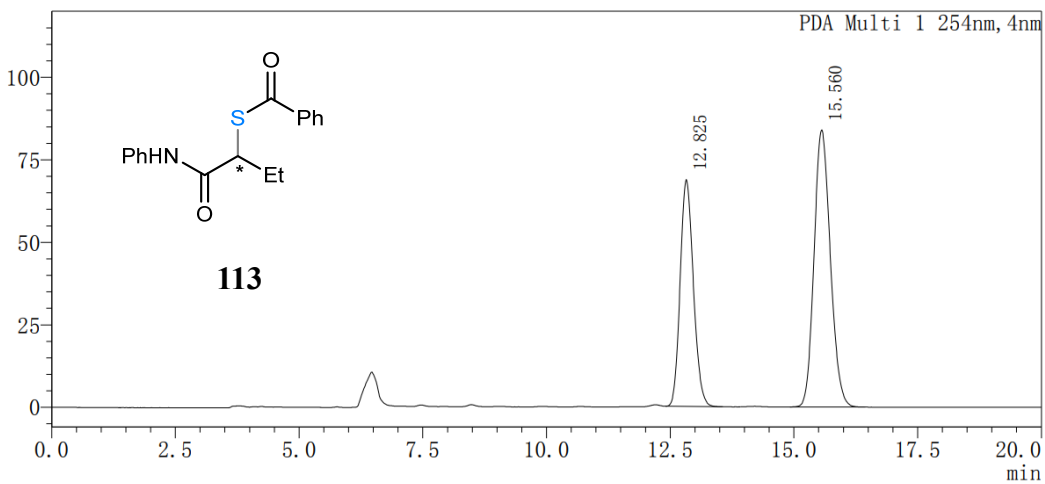

PDA Ch1 254nm

| T      | Hight | Area    | Area%  |
|--------|-------|---------|--------|
| 12.825 | 68691 | 1275356 | 39.857 |
| 15.560 | 83935 | 1924455 | 60.143 |

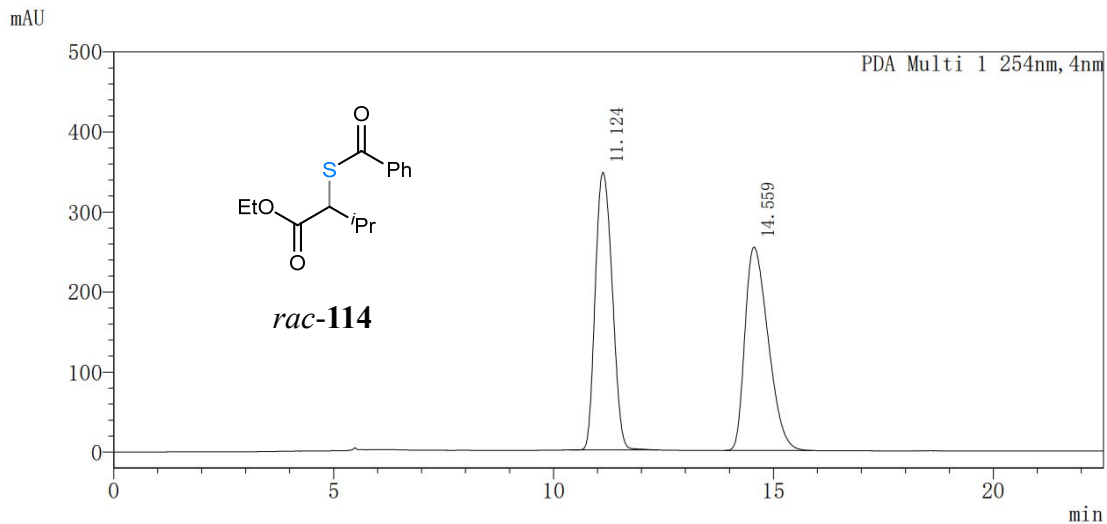

Peak Table

PDA Ch1 254nm

| Peak# | Ret. Time | Area    | Area%  |
|-------|-----------|---------|--------|
| 1     | 11.124    | 9307251 | 49.918 |
| 2     | 14.559    | 9337882 | 50.082 |

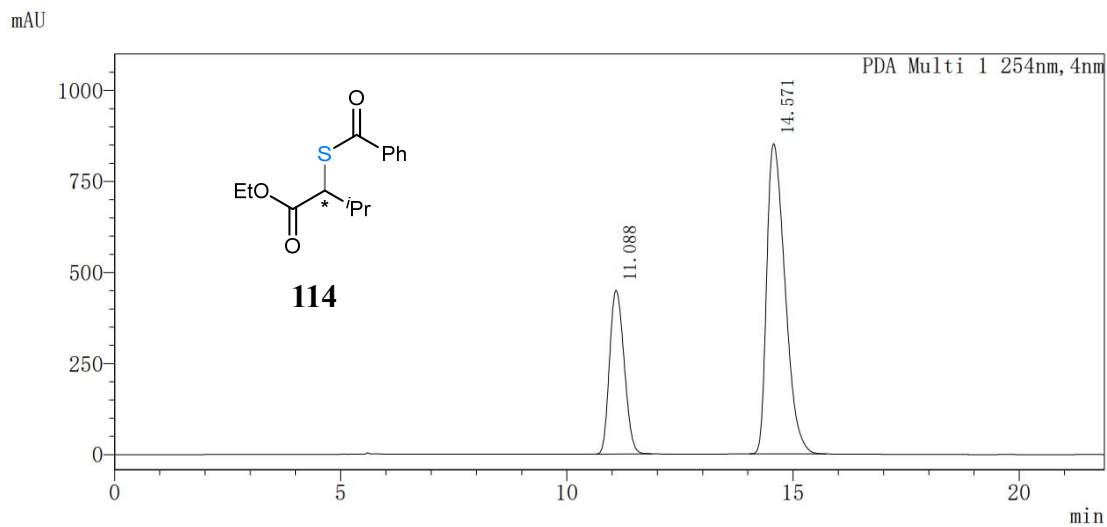

Peak Table

PDA Ch1 254nm

| Peak# | Ret. Time | Area     | Area%  |
|-------|-----------|----------|--------|
| 1     | 11.088    | 10092800 | 29.652 |
| 2     | 14.571    | 23944208 | 70.348 |

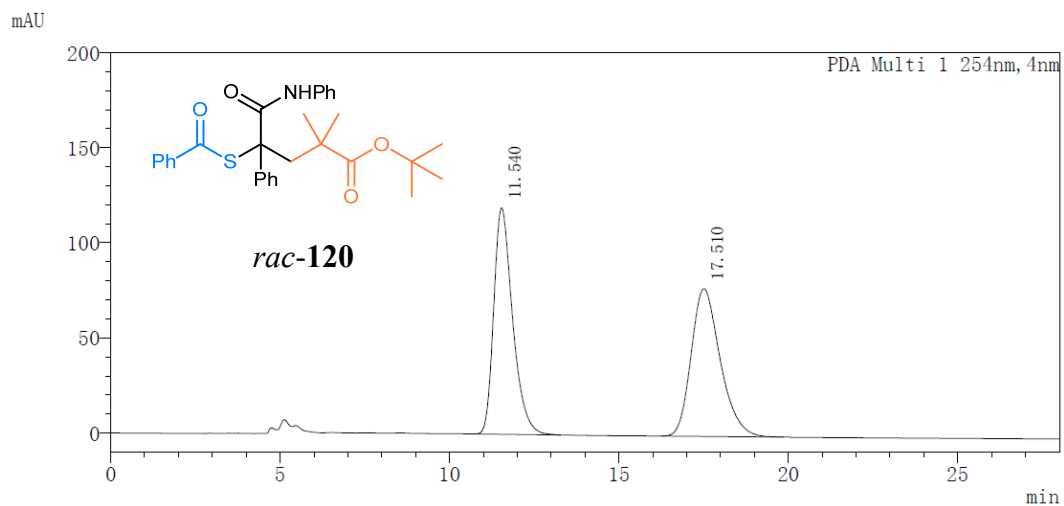

PDA Ch1 254nm

| T      | Hight  | Area    | Area%  |
|--------|--------|---------|--------|
| 11.540 | 119037 | 4614070 | 49.901 |
| 17.510 | 77640  | 4632398 | 50.099 |

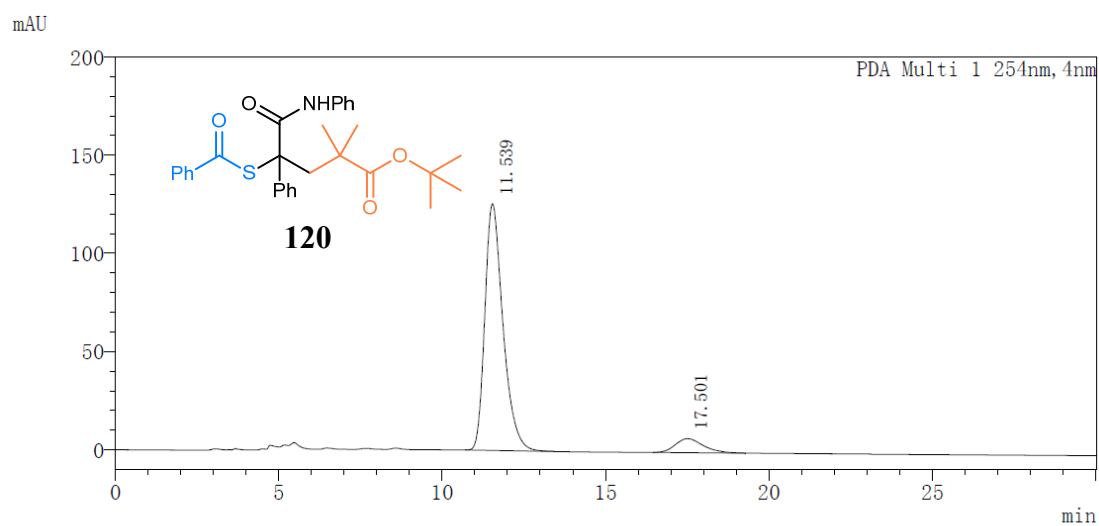

PDA Ch1 254nm

| T      | Hight  | Area    | Area%  |
|--------|--------|---------|--------|
| 11.539 | 125584 | 4850095 | 91.967 |
| 17.501 | 7146   | 423657  | 8.033  |



## 15. Reference

1. Song, Y., Fu, C. & Ma, S. Copper-catalyzed syntheses of multiple functionalized allenes via three-component reaction of enynes. *ACS Catal.* **11**, 10007–10013 (2021).
2. Lu, R. et al. Enantioselective copper-catalyzed radical cyanation of propargylic C–H bonds: easy access to chiral allenyl nitriles. *J. Am. Chem. Soc.* **143**, 14451–14451 (2021).
3. Guo, X., Shi, Z., Zhang, F.-H. & Wang, Z. Cr-catalyzed regio-, diastereo-, and enantioselective reductive couplings of ketones and propargyl halides. *ACS Catal.* **13**, 3170–3178 (2023).
4. Zhang, X. et al. An enantioconvergent halogenophilic nucleophilic substitution ( $S_N2X$ ) reaction. *Science* **363**, 400–404 (2019).
5. Xiao, X., Feng, M. & Jiang, X. New design of a disulfurating reagent: facile and straightforward pathway to unsymmetrical disulfanes by copper-catalyzed oxidative cross-coupling. *Angew. Chem. Int. Ed.* **55**, 14121–14125 (2016).
6. Dong, X.-Y. et al. A general asymmetric copper-catalysed Sonogashira  $C(sp^3)$ – $C(sp)$  coupling. *Nat. Chem.* **11**, 1158–1166 (2019).
7. Li, C. et al. Transition-metal-free stereospecific cross-coupling with alkenylboronic acids as nucleophiles. *J. Am. Chem. Soc.* **138**, 10774–10777 (2016).
8. Iwamoto, H. et al. Copper(I)-catalyzed enantioconvergent borylation of racemic benzyl chlorides enabled by quadrant-by-quadrant structure modification of chiral bisphosphine ligands. *Angew. Chem. Int. Ed.* **58**, 11112–11117 (2019).
9. Wang, P.-F. et al. Design of hemilabile N,N,N-Ligands in copper-catalyzed enantioconvergent radical cross-coupling of benzyl/propargyl halides with alkenylboronate esters. *J. Am. Chem. Soc.* **144**, 6442–6452 (2022).
10. Soler-Yanes, R., Arribas-Álvarez, I., Guisán-Ceinos, M., Buñuel, E. & Cárdenas, D. J.  $Ni^I$  catalyzes the regioselective cross-coupling of alkylzinc halides and propargyl bromides to allenes. *Chem. Eur. J.* **23**, 15840–11590 (2017).
11. Kainz, Q. M. et al. Asymmetric copper-catalyzed C–N cross-couplings induced by visible light. *Science* **351**, 681–684 (2016).
12. Wang, F.-L. et al. Mechanism-based ligand design for copper-catalysed enantioconvergent  $C(sp^3)$ – $C(sp)$  cross-coupling of tertiary electrophiles with alkynes. *Nat. Chem.* **14**, 949–957 (2022).

13. Deivaraj, T. C., Lai, G. X. & Vittal, J. J. Chemistry of thiocarboxylates: synthesis and structures of neutral copper(I) thiocarboxylates with triphenylphosphine. *Inorg. Chem.* **39**, 1028–1034 (2000).
14. Wu, H. et al. High-valent palladium-promoted formal Wagner–Meerwein rearrangement. *Org. Lett.* **18**, 5804–5807 (2016).
15. Gaussian 16, Revision A.03, Frisch, M. J., Trucks, G. W., Schlegel, H. B., Scuseria, G. E., Robb, M. A., Cheeseman, J. R., Scalmani, G., Barone, V., Petersson, G. A., Nakatsuji, H., Li, X., Caricato, M., Marenich, A. V., Bloino, J., Janesko, B. G., Gomperts, R., Mennucci, B., Hratchian, H. P., Ortiz, J. V., Izmaylov, A. F., Sonnenberg, J. L., Williams-Young, D., Ding, F., Lipparini, F., Egidi, F., Goings, J., Peng, B., Petrone, A., Henderson, T., Ranasinghe, D., Zakrzewski, V. G., Gao, J., Rega, N., Zheng, G., Liang, W., Hada, M., Ehara, M., Toyota, K., Fukuda, R., Hasegawa, J., Ishida, M., Nakajima, T., Honda, Y., Kitao, O., Nakai, H., Vreven, T., Throssell, K., Montgomery, J. A. Jr., Peralta, J. E., Ogliaro, F., Bearpark, M. J., Heyd, J. J., Brothers, E. N., Kudin, K. N., Staroverov, V. N., Keith, T. A., Kobayashi, R., Normand, J., Raghavachari, K., Rendell, A. P., Burant, J. C., Iyengar, S. S., Tomasi, J., Cossi, M., Millam, J. M., Klene, M., Adamo, C., Cammi, R., Ochterski, J. W., Martin, R. L., Morokuma, K., Farkas, O., Foresman, J. B. & Fox, D. J., Gaussian, Inc., Wallingford CT, 2016.
16. Lee, C., Yang, W. & Parr, R. G. Development of the colle-Salvetti correlation-energy formula into a functional of the electron density. *Phys. Rev. B: Condens. Matter Mater. Phys.* **37**, 785–789 (1988).
17. Becke, A. D. Density-functional thermochemistry. III. The role of exact exchange. *J. Chem. Phys.* **98**, 5648–5652 (1993).
18. Grimme, S., Antony, J., Ehrlich, S. & Krieg, H. A consistent and accurate ab initio parametrization of density functional dispersion correction (DFT-D) for the 94 elements H-Pu. *J. Chem. Phys.* **132**, 154104 (2010).
19. Grimme, S., Ehrlich, S. & Goerigk, L. Effect of the damping function in dispersion corrected density functional theory. *J. Comp. Chem.* **32**, 1456–1465 (2011).
20. Dunning Jr., T. H. & Hay, P. J. *Modern Theoretical Chemistry*, Ed. Schaefer III, H. F. Vol. 3 (Plenum, New York, 1977) 1–28.
21. Hay, P. J. & Wadt, W. R. Ab initio effective core potentials for molecular calculations. Potentials for the transition metal atoms Sc to Hg. *J. Chem. Phys.* **82**, 270–283 (1985).

22. Wadt, W. R. & Hay, P. J. Ab initio effective core potentials for molecular calculations. Potentials for main group elements Na to Bi. *J. Chem. Phys.* **82**, 284–298 (1985).
23. Hay, P. J. & Wadt, W. R. Ab initio effective core potentials for molecular calculations. Potentials for K to Au including the outermost core orbitals. *J. Chem. Phys.* **82**, 299–310 (1985).
24. Stoll, H., Fuentealba, P., Schwerdtfeger, P., Flad, J., Szentpály, L. V. & Preuss, H. Cu and Ag as one-valence-electron Atoms: CI results and quadrupole corrections for Cu<sub>2</sub>, Ag<sub>2</sub>, CuH, and AgH. *J. Chem. Phys.* **81**, 2732–2736 (1984).
25. Dolg, M., Wedig, U., Stoll, H. & Preuss, H. Energy-adjusted ab initio pseudopotentials for the first row transition elements. *J. Chem. Phys.* **86**, 866–872 (1987).
26. Häussermann, U. et al. Accuracy of energy-adjusted quasirelativistic ab initio pseudopotentials. *Mole. Phys.* **78**, 1211–1224 (1993).
27. Bergner, A., Dolg, M., Küchle, W., Stoll, H. & Preuß, H. Ab initio energy-adjusted pseudopotentials for elements of groups 13–17. *Mole. Phys.* **80**, 1431–1441 (2006).
28. Marenich, A. V., Cramer, C. J. & Truhlar, D. G. Universal solvation model based on solute electron density and on a continuum model of the solvent defined by the bulk dielectric constant and atomic surface tensions. *J. Phys. Chem. B* **113**, 6378–6396 (2009).
29. Legault, C. Y. *CYLView, 1.0b*; Université de Sherbrooke: Québec, Montreal, Canada, 2009; (<http://www.cylview.org>).
